# Supplementary material for: A Novel Prognostic Chemokine-Related lncRNAs Signature Associated with Immune Landscape in Colon Adenocarcinoma
Source: Hindawi journal article supplement (doi:10.1155/2022/2823042), 2022-11-03
Supplement: f1 [file 2823042.f1.zip]

Patients with age&gt;60

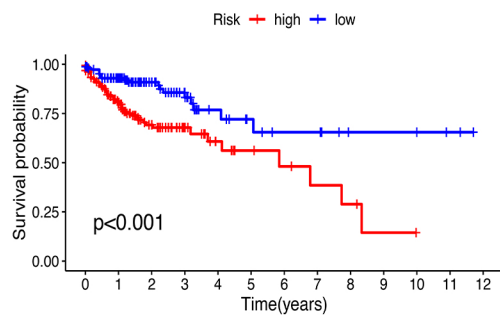

|      |      |     |    |    |    |    |   |   |   |   |   |   |   |   |
|------|------|-----|----|----|----|----|---|---|---|---|---|---|---|---|
| Risk | high | 156 | 95 | 54 | 26 | 13 | 8 | 6 | 4 | 3 | 1 | 0 | 0 | 0 |
| low  | 152  | 104 | 59 | 33 | 16 | 11 | 8 | 8 | 4 | 4 | 3 | 2 | 0 | 0 |

Time(years)

Patients with age&lt;=60

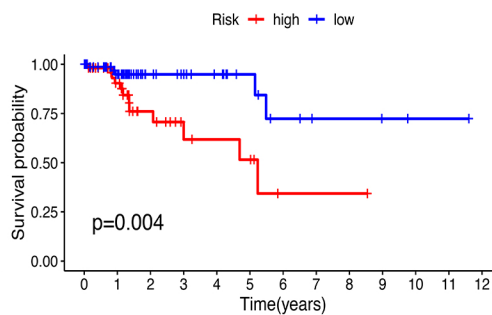

|      |      |    |    |    |    |   |   |   |   |   |   |   |   |   |
|------|------|----|----|----|----|---|---|---|---|---|---|---|---|---|
| Risk | high | 55 | 33 | 14 | 8  | 6 | 5 | 1 | 1 | 1 | 0 | 0 | 0 | 0 |
| low  | 75   | 49 | 22 | 18 | 14 | 8 | 5 | 5 | 3 | 3 | 2 | 1 | 1 | 0 |

Time(years)

Patients with FEMALE

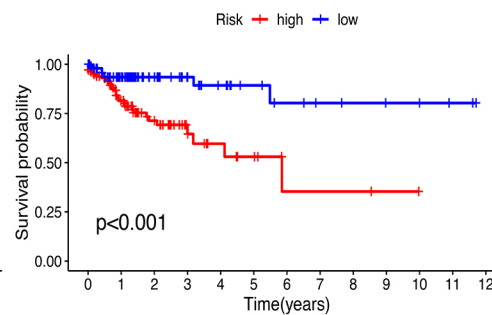

|      |      |     |    |    |    |    |   |   |   |   |   |   |   |   |
|------|------|-----|----|----|----|----|---|---|---|---|---|---|---|---|
| Risk | high | 105 | 60 | 35 | 15 | 9  | 6 | 2 | 2 | 2 | 1 | 0 | 0 | 0 |
| low  | 105  | 69  | 36 | 23 | 16 | 11 | 8 | 6 | 5 | 4 | 3 | 2 | 0 | 0 |

Time(years)

Patients with MALE

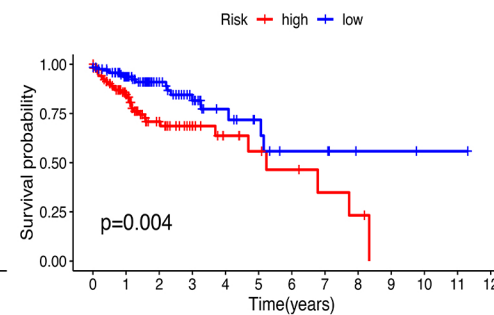

|      |      |     |    |    |    |    |   |   |   |   |   |   |   |   |
|------|------|-----|----|----|----|----|---|---|---|---|---|---|---|---|
| Risk | high | 106 | 68 | 33 | 19 | 10 | 7 | 5 | 3 | 2 | 0 | 0 | 0 | 0 |
| low  | 122  | 84  | 45 | 28 | 14 | 9  | 5 | 5 | 2 | 2 | 1 | 1 | 0 | 0 |

Time(years)

Patients with G1-G2

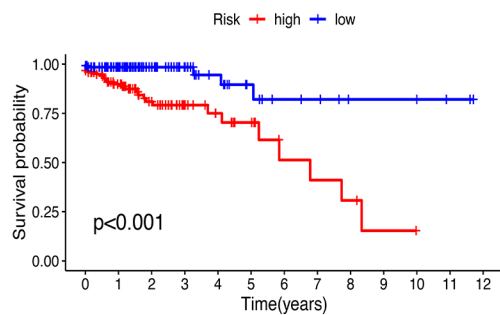

|      |      |     |    |    |    |    |    |   |   |   |   |   |   |   |
|------|------|-----|----|----|----|----|----|---|---|---|---|---|---|---|
| Risk | high | 121 | 81 | 47 | 26 | 16 | 11 | 5 | 4 | 3 | 1 | 0 | 0 | 0 |
| low  | 132  | 89  | 47 | 31 | 19 | 12 | 8  | 7 | 4 | 4 | 3 | 2 | 0 | 0 |

Time(years)

Patients with G3

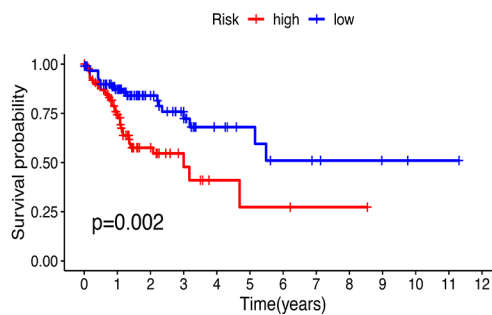

|      |      |    |    |    |    |   |   |   |   |   |   |   |   |   |
|------|------|----|----|----|----|---|---|---|---|---|---|---|---|---|
| Risk | high | 90 | 47 | 21 | 8  | 3 | 2 | 2 | 1 | 1 | 0 | 0 | 0 | 0 |
| low  | 95   | 64 | 34 | 20 | 11 | 8 | 5 | 4 | 3 | 2 | 1 | 1 | 0 | 0 |

Time(years)

Patients with T3-4

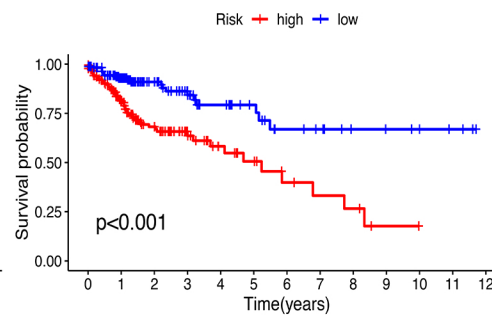

|      |      |     |     |    |    |    |    |    |   |   |   |   |   |   |
|------|------|-----|-----|----|----|----|----|----|---|---|---|---|---|---|
| Risk | high | 181 | 104 | 59 | 30 | 17 | 12 | 7  | 5 | 4 | 1 | 0 | 0 | 0 |
| low  | 173  | 117 | 65  | 42 | 27 | 20 | 13 | 11 | 7 | 6 | 4 | 3 | 0 | 0 |

Time(years)

Patients with N0

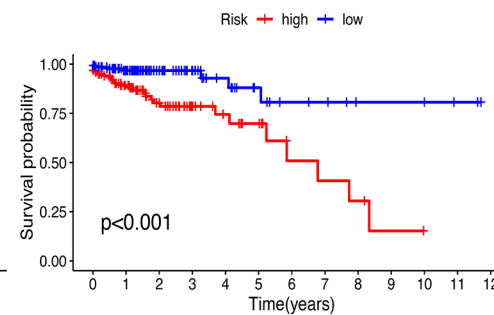

|      |      |     |    |    |    |    |    |   |   |   |   |   |   |   |
|------|------|-----|----|----|----|----|----|---|---|---|---|---|---|---|
| Risk | high | 123 | 81 | 47 | 26 | 16 | 11 | 5 | 4 | 3 | 1 | 0 | 0 | 0 |
| low  | 138  | 92  | 47 | 31 | 19 | 12 | 8  | 7 | 4 | 4 | 3 | 2 | 0 | 0 |

Time(years)

Patients with N1-2

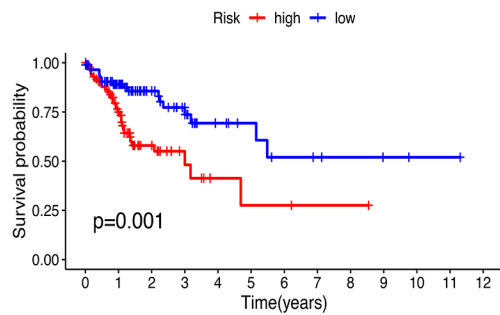

|      |      |    |    |    |    |   |   |   |   |   |   |   |   |   |
|------|------|----|----|----|----|---|---|---|---|---|---|---|---|---|
| Risk | high | 88 | 47 | 21 | 8  | 3 | 2 | 2 | 1 | 1 | 0 | 0 | 0 | 0 |
| low  | 89   | 61 | 34 | 20 | 11 | 8 | 5 | 4 | 3 | 2 | 1 | 1 | 0 | 0 |

Time(years)

Patients with M0

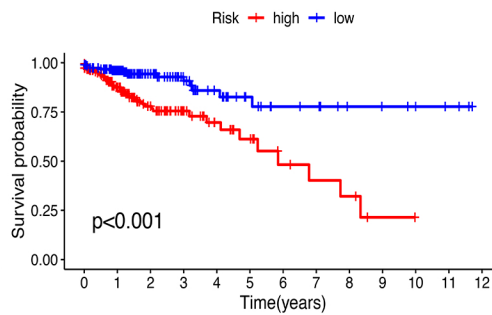

|      |      |     |     |    |    |    |    |    |   |   |   |   |   |   |
|------|------|-----|-----|----|----|----|----|----|---|---|---|---|---|---|
| Risk | high | 185 | 116 | 66 | 33 | 19 | 13 | 7  | 5 | 4 | 1 | 0 | 0 | 0 |
| low  | 192  | 132 | 70  | 45 | 26 | 17 | 12 | 11 | 7 | 6 | 4 | 3 | 0 | 0 |

Time(years)

Patients with M1

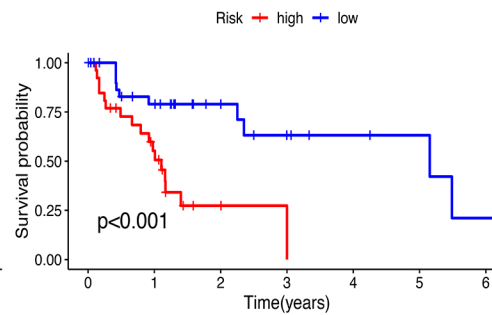

|      |      |    |    |   |   |   |   |   |   |   |   |   |   |   |
|------|------|----|----|---|---|---|---|---|---|---|---|---|---|---|
| Risk | high | 26 | 12 | 2 | 1 | 0 | 0 | 0 | 0 | 0 | 0 | 0 | 0 | 0 |
| low  | 35   | 21 | 11 | 6 | 4 | 3 | 3 | 3 | 1 | 1 | 1 | 1 | 0 | 0 |

Time(years)

Patients with Stage I-II

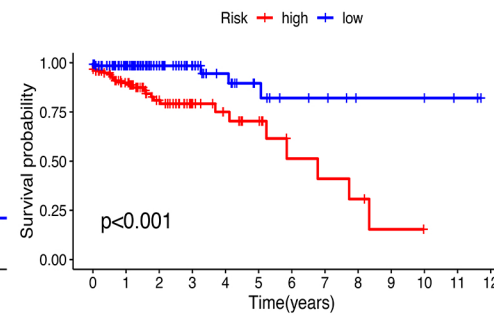

|      |      |     |    |    |    |    |    |   |   |   |   |   |   |   |
|------|------|-----|----|----|----|----|----|---|---|---|---|---|---|---|
| Risk | high | 121 | 81 | 47 | 26 | 16 | 11 | 5 | 4 | 3 | 1 | 0 | 0 | 0 |
| low  | 132  | 89  | 47 | 31 | 19 | 12 | 8  | 7 | 4 | 4 | 3 | 2 | 0 | 0 |

Time(years)

Patients with Stage III-IV

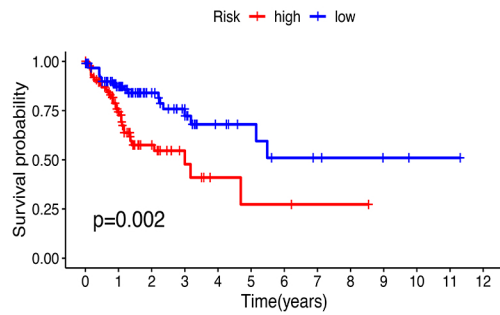

|      |      |    |    |    |    |   |   |   |   |   |   |   |   |   |
|------|------|----|----|----|----|---|---|---|---|---|---|---|---|---|
| Risk | high | 90 | 47 | 21 | 8  | 3 | 2 | 2 | 1 | 1 | 0 | 0 | 0 | 0 |
| low  | 95   | 64 | 34 | 20 | 11 | 8 | 5 | 4 | 3 | 2 | 1 | 1 | 0 | 0 |

Time(years)
