# Supplementary material for: A Novel Prognostic Chemokine-Related lncRNAs Signature Associated with Immune Landscape in Colon Adenocarcinoma
Source: Dis Markers. 2022 Nov 3;2022:2823042. doi: 10.1155/2022/2823042 (PMC9649319; doi:10.1155/2022/2823042)
Supplement: Supplementary Materials — Supplementary Figure S1: (A) Heatmap of the expression of prognostic chemokine-related lncRNAs between tumor tissues and normal tissues. (B) Boxplot of the expression of prognostic chemokine-related prognostic lncRNAs in COAD tissues and normal tissues. (C) Barplot showed the proportion of 22 kinds of TIICs in each COAD sample. (D) Correlation between 22 kinds of TIICs was visualized. ∗p < 0.05; ∗∗p < 0.01; ∗∗∗p < 0.001. Supplementary Figure S2: Survival analysis was conducted in high-risk and low-risk patients with different clinical parameters. Supplementary Figure S3: Risk stratification showed the differences in drug susceptibility between high-risk and low-risk groups. Supplementary Table S1: Clinical information of the COAD patients. Supplementary Table S2: The 64 chemokine genes. Supplementary Table S3: Expression of 52 chemokine-related lncRNAs in COAD. Supplementary Table S4: Immune cell content of COAD samples was calculated using the CIBERSORT algorithm. Supplementary Table S5: Immune, Stromal, and ESTIMATE scores for COAD samples. Supplementary Table S6: Expression of 10 chemokine-related lncRNAs and risk score in the entire cohort. Supplementary Table S7: The immune cell infiltration status in all tumor samples in RNA-seq. Supplementary Table S8: Tumor mutation burden data of the low-risk group. Supplementary Table S9: Tumor mutation burden data of the high-risk group. Supplementary Table S10. The immunotherapy score data was obtained from the TCIA database. Supplementary Table S11: Quantitative real-time PCR primer sequences of model lncRNAs. Supplementary Table S12: The correlation values of immune cell infiltration and patient risk score. Supplementary Table S13: The correlation values of chemokine-related lncRNAs and immune cells. [file 2823042.f1.zip › Supplementary Table 1 (1).txt]

Id	futime	fustat	age	gender	grade	stage	T	M	N
TCGA-AA-3712	0	0	65	MALE	unknow	Stage III	T3	M0	N2
TCGA-AA-3814	0	0	85	FEMALE	unknow	Stage IIA	T3	M0	N0
TCGA-AA-A03F	0	0	90	FEMALE	unknow	Stage III	T3	M0	N2
TCGA-AA-3529	0	1	78	FEMALE	unknow	Stage IIIC	T3	M0	N2
TCGA-AA-3984	0	0	61	FEMALE	unknow	Stage IIA	T3	M0	N0
TCGA-CK-6746	0	0	84	FEMALE	unknow	Stage IIB	T4b	MX	N0
TCGA-AA-3850	0	1	74	MALE	unknow	Stage I	T2	M0	N0
TCGA-AA-3852	0	1	88	MALE	unknow	Stage IIA	T3	M0	N0
TCGA-AA-3693	0	0	77	FEMALE	unknow	Stage IV	T4	M1	N1
TCGA-NH-A5IV	0	0	90	FEMALE	unknow	Stage IIA	T3	MX	N0
TCGA-AA-A022	0	0	88	FEMALE	unknow	Stage II	T4	M0	N0
TCGA-AA-3672	0	0	90	FEMALE	unknow	Stage III	T3	M0	N1
TCGA-G4-6302	0	0	90	FEMALE	unknow	Stage IIA	T3	M0	N0
TCGA-CK-5915	0	0	63	MALE	unknow	Stage I	T2	MX	N0
TCGA-AA-3684	0	0	65	FEMALE	unknow	Stage IV	T4	M1	N2
TCGA-G4-6298	0	1	90	MALE	unknow	Stage IIIB	T4a	MX	N1
TCGA-AA-3695	0	0	63	FEMALE	unknow	Stage IV	T3	M1	N2
TCGA-AA-3872	0	0	45	MALE	unknow	Stage IV	T4	M1	N2
TCGA-AA-3845	0	1	86	FEMALE	unknow	Stage IIA	T3	M0	N0
TCGA-AA-3527	0	0	90	FEMALE	unknow	Stage IIA	T3	M0	N0
TCGA-AD-A5EJ	0	0	74	FEMALE	unknow	Stage IIA	T3	MX	N0
TCGA-G4-6626	1	1	90	MALE	unknow	Stage IIA	T3	M0	N0
TCGA-AA-3492	1	1	90	FEMALE	unknow	Stage II	T3	M0	N0
TCGA-AA-3525	1	0	90	MALE	unknow	Stage IIIB	T3	M0	N1
TCGA-AY-6196	6	0	47	MALE	unknow	Stage IIIC	T3	unknow	N2b
TCGA-AM-5820	14	0	59	FEMALE	unknow	Stage IVA	T4a	M1	N2
TCGA-F4-6854	16	0	77	FEMALE	unknow	Stage IIA	T3	M0	N0
TCGA-AA-A02O	28	0	82	MALE	unknow	Stage II	T3	M0	N0
TCGA-AM-5821	28	0	68	FEMALE	unknow	Stage IIA	T3	M0	N0
TCGA-AY-4071	29	1	63	FEMALE	unknow	Stage I	T1	unknow	N0
TCGA-AA-3543	30	0	84	MALE	unknow	Stage I	T2	M0	N0
TCGA-AA-A00R	30	0	64	FEMALE	unknow	Stage I	T2	M0	N0
TCGA-AA-3856	30	0	59	MALE	unknow	Stage IIA	T3	M0	N0
TCGA-AA-3818	30	1	78	FEMALE	unknow	Stage IIA	T3	M0	N0
TCGA-AA-3518	31	0	81	FEMALE	unknow	Stage IIA	T3	M0	N0
TCGA-AA-3494	31	0	55	MALE	unknow	Stage IV	T3	M1	N0
TCGA-AA-A01Q	31	0	48	FEMALE	unknow	Stage II	T3	M0	N0
TCGA-AA-A01S	31	0	47	FEMALE	unknow	Stage III	T3	M0	N1
TCGA-AA-3514	31	0	81	FEMALE	unknow	Stage I	T2	M0	N0
TCGA-AA-3821	31	0	81	FEMALE	unknow	Stage I	T2	M0	N0
TCGA-AA-A01V	31	0	59	MALE	unknow	Stage I	T2	M0	N0
TCGA-AA-3496	31	0	83	FEMALE	unknow	Stage II	T3	M0	N0
TCGA-AZ-4323	43	1	37	MALE	unknow	Stage IV	T4	M1	N2
TCGA-F4-6704	47	0	60	MALE	unknow	Stage IIIC	T3	MX	N2b
TCGA-5M-AAT4	49	1	74	MALE	unknow	Stage IV	T3	M1b	N0
TCGA-AZ-6608	59	1	55	FEMALE	unknow	Stage IIIA	T2	M0	N1
TCGA-AA-A02H	61	1	74	FEMALE	unknow	Stage IV	T3	M1	N2
TCGA-AA-3952	61	1	68	MALE	unknow	Stage IIIC	T3	M0	N2
TCGA-AA-3966	61	0	89	FEMALE	unknow	Stage IIA	T3	M0	N0
TCGA-CK-6748	61	0	45	FEMALE	unknow	Stage IV	T3	M1	N1
TCGA-CM-5864	61	0	60	MALE	unknow	Stage I	T2	M0	N0
TCGA-AA-3930	61	1	66	MALE	unknow	Stage IV	T3	M1	N2
TCGA-AA-3666	61	1	68	MALE	unknow	Stage III	T3	M0	N1
TCGA-CA-5256	65	0	54	FEMALE	unknow	Stage IIA	T3	M0	N0
TCGA-CA-5254	68	0	42	FEMALE	unknow	Stage IIA	T3	M0	N0
TCGA-CK-6747	89	0	87	FEMALE	unknow	Stage IIA	T3	MX	N0
TCGA-AA-A02E	90	1	82	FEMALE	unknow	Stage IV	T3	M1	N1
TCGA-CM-6680	91	0	78	FEMALE	unknow	Stage IIIB	T3	M0	N2a
TCGA-CA-5255	93	0	45	MALE	unknow	Stage IIA	T3	M0	N0
TCGA-AZ-6607	97	1	69	MALE	unknow	Stage IV	T4	M1	N2
TCGA-CA-5796	99	0	52	FEMALE	unknow	Stage IIA	T3	M0	N0
TCGA-CA-5797	100	0	56	MALE	unknow	Stage IIA	T3	M0	N0
TCGA-CM-6678	122	0	63	FEMALE	unknow	Stage IVA	T4a	M1a	N1c
TCGA-CM-6167	122	0	57	FEMALE	unknow	Stage IIIC	T3	M0	N2b
TCGA-CM-6679	122	0	58	MALE	unknow	Stage IIA	T3	M0	N0
TCGA-AA-A00N	122	1	75	MALE	unknow	Stage IIB	T4	M0	N0
TCGA-CM-4752	123	0	58	MALE	unknow	Stage IIA	T3	M0	N0
TCGA-4N-A93T	146	0	67	MALE	unknow	Stage IIIB	T4a	M0	N1b
TCGA-D5-6537	146	1	64	MALE	unknow	Stage IIIB	T3	MX	N1a
TCGA-CM-6674	150	0	39	MALE	unknow	Stage IIA	T3	M0	N0
TCGA-AA-A02J	153	1	70	FEMALE	unknow	Stage IV	T3	M1	N0
TCGA-CM-5862	153	1	80	MALE	unknow	Stage IVA	T3	M1a	N1a
TCGA-CM-6676	153	0	82	MALE	unknow	Stage I	T2	M0	N0
TCGA-CM-6675	153	0	35	MALE	unknow	Stage IVB	T3	M1b	N2b
TCGA-AA-3696	153	1	75	FEMALE	unknow	Stage IV	T3	M1	N1
TCGA-CM-6677	153	0	75	FEMALE	unknow	Stage IIA	T3	M0	N0
TCGA-AZ-4616	156	1	82	FEMALE	unknow	Stage IV	T3	M1	N2
TCGA-AZ-6605	159	1	77	MALE	unknow	Stage IIIB	T4	M0	N1
TCGA-AZ-4614	172	1	71	FEMALE	unknow	Stage IVA	T4a	M1	N1
TCGA-AD-6899	176	1	84	MALE	unknow	Stage IIIC	T4a	MX	N2b
TCGA-DM-A285	179	1	71	FEMALE	unknow	Stage IV	T3	M1	N2
TCGA-CM-6168	181	0	84	FEMALE	unknow	Stage IIA	T3	M0	N0
TCGA-CM-6171	182	0	77	FEMALE	unknow	Stage I	T2	M0	N0
TCGA-AA-3681	182	0	77	FEMALE	unknow	Stage III	T3	M0	N1
TCGA-CM-4743	184	0	69	MALE	unknow	Stage IIA	T3	M0	N0
TCGA-AA-3662	184	0	80	FEMALE	unknow	Stage IV	T4	M1	N2
TCGA-F4-6570	188	1	78	FEMALE	unknow	Stage IIA	T3	M0	N0
TCGA-A6-6782	189	0	82	MALE	unknow	Stage IIB	T4a	MX	N0
TCGA-AZ-6599	206	1	72	MALE	unknow	Stage I	T2	MX	N0
TCGA-AA-3663	212	0	42	MALE	unknow	Stage II	T3	M0	N0
TCGA-CM-6165	212	0	74	MALE	unknow	Stage IIA	T3	M0	N0
TCGA-AA-3511	212	0	64	MALE	unknow	Stage II	T4	M0	N0
TCGA-CM-6172	212	0	70	FEMALE	unknow	Stage IIIB	T3	M0	N1a
TCGA-CM-6161	212	0	36	FEMALE	unknow	Stage I	T2	M0	N0
TCGA-CM-6162	212	0	48	FEMALE	unknow	Stage IIIB	T3	M0	N1a
TCGA-CM-4744	214	0	69	MALE	unknow	Stage I	T2	M0	N0
TCGA-AA-3489	214	1	75	MALE	unknow	Stage II	T3	M0	N0
TCGA-CM-4748	214	0	53	MALE	unknow	Stage IIIB	T4a	M0	N1a
TCGA-DM-A1DA	228	1	71	FEMALE	unknow	Stage IIIC	T3	M0	N2
TCGA-D5-6898	229	0	51	FEMALE	unknow	Stage I	T2	M0	N0
TCGA-A6-4107	231	0	57	FEMALE	unknow	Stage IIIB	T3	M0	N1b
TCGA-DM-A280	236	1	70	FEMALE	unknow	Stage IIA	T3	M0	N0
TCGA-CM-6170	242	0	73	FEMALE	unknow	Stage I	T2	M0	N0
TCGA-AA-3989	242	1	84	MALE	unknow	Stage IV	T3	M1	N2
TCGA-AA-3980	242	0	89	FEMALE	unknow	Stage I	T2	M0	N0
TCGA-CM-6169	243	0	67	MALE	unknow	Stage IIA	T3	M0	N0
TCGA-CM-4747	244	0	47	MALE	unknow	Stage IVA	T4a	M1a	N1b
TCGA-A6-3810	247	0	62	MALE	unknow	Stage IIA	T3	M0	N0
TCGA-G4-6295	254	0	70	FEMALE	unknow	Stage II	T3	M0	N0
TCGA-A6-6141	255	0	31	MALE	unknow	Stage IIA	T3	M0	N0
TCGA-A6-6651	259	0	55	FEMALE	unknow	Stage IIIB	T3	MX	N1b
TCGA-F4-6459	262	1	61	FEMALE	unknow	Stage IIIB	T3	M0	N2a
TCGA-CM-5341	273	0	82	FEMALE	unknow	Stage IIIA	T2	M0	N1a
TCGA-D5-6926	275	0	65	MALE	unknow	Stage IIIB	T4a	M0	N1
TCGA-AA-3519	276	0	63	MALE	unknow	Stage III	T3	M0	N1
TCGA-A6-6650	278	0	69	FEMALE	unknow	Stage IIA	T3	M0	N0
TCGA-A6-3808	279	0	73	MALE	unknow	Stage IIA	T3	M0	N0
TCGA-A6-6138	280	0	61	MALE	unknow	Stage I	T2	M0	N0
TCGA-A6-6653	282	0	82	MALE	unknow	Stage I	T2	M0	N0
TCGA-A6-5659	286	0	82	MALE	unknow	Stage I	T2	M0	N0
TCGA-D5-6927	287	0	34	MALE	unknow	Stage IIA	T3	M0	N0
TCGA-5M-AAT6	290	1	40	FEMALE	unknow	Stage IV	T4a	M1a	N2b
TCGA-A6-6781	293	0	43	MALE	unknow	Stage IIIC	T4b	MX	N1b
TCGA-A6-A5ZU	293	0	59	MALE	unknow	Stage IIIB	T3	M0	N1
TCGA-NH-A6GA	302	1	58	MALE	unknow	Stage IIIC	T4a	MX	N2a
TCGA-CM-5863	304	0	60	FEMALE	unknow	Stage IIIB	T3	M0	N1b
TCGA-CM-5860	304	0	44	MALE	unknow	Stage IIA	T3	M0	N0
TCGA-CM-5344	304	0	39	FEMALE	unknow	Stage IIIB	T3	M0	N1b
TCGA-AA-3811	306	1	84	FEMALE	unknow	Stage III	T3	M0	N2
TCGA-AA-3848	306	1	82	FEMALE	unknow	Stage IIIC	T3	M0	N2
TCGA-CA-6718	306	1	46	MALE	unknow	Stage IIA	T3	M0	N0
TCGA-A6-5661	306	0	80	FEMALE	unknow	Stage IIA	T3	M0	N0
TCGA-D5-6922	308	0	76	MALE	unknow	Stage IIIA	T3	M0	N1
TCGA-D5-7000	312	0	79	FEMALE	unknow	Stage I	T2	M0	N0
TCGA-A6-3809	314	0	71	FEMALE	unknow	Stage IIB	T4	M0	N0
TCGA-A6-5667	320	0	40	FEMALE	unknow	Stage IIIB	T3	MX	N1a
TCGA-A6-6649	328	0	66	MALE	unknow	Stage IIIB	T3	M0	N1b
TCGA-AD-6964	331	1	58	MALE	unknow	unknow	T4a	unknow	N2b
TCGA-A6-3807	333	0	53	FEMALE	unknow	Stage IIIC	T3	M0	N2
TCGA-NH-A50U	334	1	42	MALE	unknow	Stage IVA	T4a	M1a	N0
TCGA-CM-5349	335	0	68	FEMALE	unknow	Stage IIA	T3	M0	N0
TCGA-AA-3680	335	1	67	FEMALE	unknow	Stage IV	T4	M1	N2
TCGA-CM-5861	335	0	63	FEMALE	unknow	Stage IIA	T3	M0	N0
TCGA-F4-6461	338	1	41	FEMALE	unknow	Stage IIIC	T4b	M0	N2
TCGA-A6-5660	342	0	73	MALE	unknow	Stage IIIC	T3	M0	N2b
TCGA-A6-6648	344	0	56	MALE	unknow	Stage IVA	T3	M1a	N0
TCGA-D5-6932	346	0	69	MALE	unknow	Stage IIA	T3	M0	N0
TCGA-A6-6137	348	0	55	MALE	unknow	Stage IIIB	T3	M0	N1c
TCGA-4T-AA8H	349	0	42	FEMALE	unknow	Stage IIA	T3	MX	N0
TCGA-3L-AA1B	349	0	61	FEMALE	unknow	Stage I	T2	M0	N0
TCGA-D5-5541	350	0	63	MALE	unknow	Stage IIIB	T3	M0	N1a
TCGA-A6-6780	354	0	74	MALE	unknow	Stage IIA	T3	MX	N0
TCGA-D5-6928	354	0	80	MALE	unknow	Stage IIA	T3	M0	N0
TCGA-A6-6140	356	0	62	MALE	unknow	Stage IIA	T3	M0	N0
TCGA-AZ-6606	357	1	81	MALE	unknow	Stage IV	T4	M1	N2
TCGA-AY-6386	360	0	66	FEMALE	unknow	Stage IIIB	T3	M0	N1a
TCGA-A6-5666	362	0	78	MALE	unknow	Stage IIC	T4b	M0	N0
TCGA-T9-A92H	362	0	82	MALE	unknow	Stage IIA	T3	M0	N0
TCGA-A6-5664	362	0	80	MALE	unknow	Stage IIIC	T4a	MX	N2a
TCGA-D5-6931	365	0	77	MALE	unknow	Stage IIIC	T4b	M0	N2
TCGA-AA-A01G	365	0	63	MALE	unknow	Stage IIA	T3	M0	N0
TCGA-A6-5657	367	0	65	MALE	unknow	Stage IIIB	T3	M0	N1
TCGA-AZ-6600	368	1	64	MALE	unknow	Stage IV	T4	M1	N1
TCGA-A6-6142	368	0	56	FEMALE	unknow	Stage IVA	T3	M1a	N1a
TCGA-AD-5900	370	0	67	MALE	unknow	Stage I	T2	MX	N0
TCGA-CA-6716	371	0	65	MALE	unknow	Stage IIA	T3	M0	N0
TCGA-D5-5538	373	0	60	FEMALE	unknow	Stage IIIB	T3	M0	N1b
TCGA-D5-6920	377	0	77	FEMALE	unknow	Stage IIA	T3	M0	N0
TCGA-D5-6923	378	0	57	MALE	unknow	Stage I	T2	M0	N0
TCGA-D5-6539	380	0	45	FEMALE	unknow	unknow	T3	M0	N0
TCGA-CA-6715	383	0	63	MALE	unknow	Stage IIIB	T3	M0	N1
TCGA-DM-A1D8	383	1	50	FEMALE	unknow	unknow	T3	unknow	N1
TCGA-A6-2684	387	0	75	FEMALE	unknow	Stage I	T2	M0	N0
TCGA-CA-6717	388	0	57	MALE	unknow	Stage IIA	T3	M0	N0
TCGA-NH-A6GC	389	0	66	FEMALE	unknow	Stage IVB	T4b	M1b	N1b
TCGA-CM-5348	393	0	72	MALE	unknow	Stage IIIB	T3	M0	N1a
TCGA-AA-3939	395	0	83	MALE	unknow	Stage IIA	T3	M0	N0
TCGA-AA-3542	395	0	69	MALE	unknow	Stage IIIC	T3	M0	N2
TCGA-AA-3516	396	1	74	FEMALE	unknow	Stage III	T3	M0	N2
TCGA-AA-3552	396	1	85	MALE	unknow	Stage IIIC	T3	M0	N2
TCGA-AA-3973	397	0	69	MALE	unknow	Stage IV	T4	M1	N1
TCGA-A6-6654	399	0	65	FEMALE	unknow	Stage IIIB	T3	M0	N1
TCGA-F4-6809	403	1	52	FEMALE	unknow	Stage IVA	T3	M1	N1
TCGA-A6-5665	404	0	84	FEMALE	unknow	Stage IIA	T3	M0	N0
TCGA-DM-A1D7	405	1	82	MALE	unknow	Stage IIA	T3	M0	N0
TCGA-D5-6930	406	0	67	MALE	unknow	Stage IIA	T3	M0	N0
TCGA-F4-6460	407	0	51	FEMALE	unknow	Stage IIIB	T3	M0	N1
TCGA-D5-6929	408	0	49	FEMALE	unknow	Stage IV	T3	M1	N1
TCGA-F4-6569	409	0	60	MALE	unknow	Stage I	T2	M0	N0
TCGA-D5-5540	411	0	73	MALE	unknow	Stage IIA	T3	M0	N0
TCGA-F4-6463	415	0	51	MALE	unknow	Stage IIA	T3	M0	N0
TCGA-G4-6323	419	0	50	MALE	unknow	Stage IA	Tis	MX	N0
TCGA-AY-6197	423	0	60	MALE	unknow	Stage IIA	T3	unknow	N0
TCGA-A6-2670	424	0	45	MALE	unknow	Stage IIA	T3	M0	N0
TCGA-AA-A004	424	0	76	MALE	unknow	Stage IIA	T3	M0	N0
TCGA-A6-2682	424	1	70	MALE	unknow	Stage IV	T4b	M1	N1
TCGA-AA-3561	424	0	72	MALE	unknow	Stage IIA	T3	M0	N0
TCGA-CM-6166	424	0	48	FEMALE	unknow	Stage I	T2	M0	N0
TCGA-AA-3544	426	0	68	MALE	unknow	Stage I	T2	M0	N0
TCGA-AA-3667	426	0	36	FEMALE	unknow	Stage I	T2	M0	N0
TCGA-AA-A02K	426	1	50	MALE	unknow	Stage IV	T4	M1	N2
TCGA-CM-5868	426	0	59	FEMALE	unknow	Stage IVA	T4a	M1a	N1a
TCGA-DM-A288	427	1	68	MALE	unknow	Stage IIIC	T3	M0	N2
TCGA-CM-6163	427	0	74	MALE	unknow	Stage I	T1	M0	N0
TCGA-D5-6924	435	0	68	MALE	unknow	Stage IIA	T3	M0	N0
TCGA-CA-6719	435	0	77	MALE	unknow	Stage IIA	T3	M0	N0
TCGA-A6-2678	437	0	43	FEMALE	unknow	Stage IIIB	T3	M0	N1
TCGA-AU-3779	441	0	80	FEMALE	unknow	Stage IIA	T3	M0	N0
TCGA-A6-4105	442	1	79	MALE	unknow	Stage IIA	T3	M0	N0
TCGA-A6-2676	447	0	75	FEMALE	unknow	Stage IIB	T4	M0	N0
TCGA-A6-5662	453	0	46	MALE	unknow	Stage IVA	T3	M1	N2
TCGA-AA-3844	454	0	78	FEMALE	unknow	Stage IIIC	T3	M0	N2
TCGA-A6-6652	456	0	59	MALE	unknow	Stage IVA	T3	M1	N0
TCGA-AA-A00W	456	0	80	MALE	unknow	Stage I	T1	M0	N0
TCGA-AA-A01C	457	0	75	MALE	unknow	Stage IIIA	T2	M0	N1
TCGA-AA-3679	457	0	59	MALE	unknow	Stage IV	T3	M1	N2
TCGA-AA-A017	457	0	57	FEMALE	unknow	Stage IIA	T3	M0	N0
TCGA-D5-6535	460	0	80	FEMALE	unknow	Stage IIIB	T3	MX	N1
TCGA-A6-5656	462	0	74	MALE	unknow	Stage I	T2	M0	N0
TCGA-A6-2685	464	0	48	FEMALE	unknow	Stage IIA	T3	M0	N0
TCGA-A6-2683	472	0	57	FEMALE	unknow	Stage IV	T4	M1	N0
TCGA-AD-6888	472	1	73	MALE	unknow	Stage IIIB	T3	M0	N1b
TCGA-D5-6541	474	0	49	MALE	unknow	Stage IIA	T3	M0	N0
TCGA-CK-4952	475	0	48	FEMALE	unknow	Stage IIIC	T4	M0	N2
TCGA-NH-A6GB	476	0	71	FEMALE	unknow	Stage IIIC	T3	MX	N2b
TCGA-AY-5543	479	0	65	FEMALE	unknow	Stage IVA	T3	M1	N1a
TCGA-F4-6806	481	0	59	FEMALE	unknow	Stage I	T2	M0	N0
TCGA-AA-3833	485	0	63	FEMALE	unknow	Stage IIA	T3	M0	N0
TCGA-CM-6164	487	0	46	FEMALE	unknow	Stage IIA	T3	M0	N0
TCGA-A6-2686	488	0	81	FEMALE	unknow	Stage IIA	T3	M0	N0
TCGA-AA-3971	489	0	58	MALE	unknow	Stage III	T3	M0	N1
TCGA-D5-6540	491	0	66	MALE	unknow	Stage I	T2	M0	N0
TCGA-A6-A565	494	1	34	FEMALE	unknow	Stage IIIC	T3	MX	N2
TCGA-F4-6807	494	0	51	FEMALE	unknow	Stage IIIC	T3	M0	N2b
TCGA-AY-4070	496	1	50	FEMALE	unknow	Stage IIIC	T3	M0	N2
TCGA-F4-6805	496	0	58	FEMALE	unknow	Stage IIA	T3	M0	N0
TCGA-AD-A5EK	500	0	51	MALE	unknow	Stage I	T2	MX	N0
TCGA-A6-2672	503	0	82	FEMALE	unknow	Stage IIIB	T3	M0	N1
TCGA-NH-A8F8	511	1	79	MALE	unknow	Stage IV	T4a	M1	N2b
TCGA-AA-A00U	518	0	50	MALE	unknow	Stage IIIB	T3	M0	N1
TCGA-AA-3846	518	0	74	FEMALE	unknow	Stage IIA	T3	M0	N0
TCGA-CK-6751	518	0	88	FEMALE	unknow	Stage I	T2	MX	N0
TCGA-AA-3866	518	0	78	FEMALE	unknow	Stage I	T2	M0	N0
TCGA-D5-6538	521	0	79	FEMALE	unknow	Stage IIIB	T3	M0	N2
TCGA-A6-2680	522	0	72	FEMALE	unknow	Stage II	T3	M0	N0
TCGA-A6-2674	523	0	71	MALE	unknow	Stage IV	T3	M1	N2
TCGA-AY-A54L	525	0	74	FEMALE	unknow	Stage I	T2	M0	N0
TCGA-CK-4947	534	0	46	FEMALE	unknow	Stage IIIB	T4	M0	N1
TCGA-D5-6531	540	0	75	MALE	unknow	Stage IIA	T3	M0	N0
TCGA-A6-2677	541	0	68	FEMALE	unknow	Stage IIIC	T3	M0	N2
TCGA-AY-A69D	543	0	55	FEMALE	unknow	Stage IIA	T3	M0	N0
TCGA-D5-6536	543	0	73	MALE	unknow	Stage IIA	T3	M0	N0
TCGA-NH-A8F7	543	0	53	FEMALE	unknow	Stage IIA	T3	MX	N0
TCGA-AA-3554	546	0	62	FEMALE	unknow	Stage IIA	T3	M0	N0
TCGA-AA-3831	547	0	66	MALE	unknow	Stage IIA	T3	M0	N0
TCGA-AA-A00K	549	0	79	MALE	unknow	Stage IIA	T3	M0	N0
TCGA-AA-3875	549	0	78	FEMALE	unknow	Stage I	T1	M0	N0
TCGA-AA-A00J	549	0	80	MALE	unknow	Stage IIIB	T4	M0	N1
TCGA-A6-2681	552	0	73	FEMALE	unknow	Stage IIA	T3	M0	N0
TCGA-NH-A50T	553	0	68	FEMALE	unknow	Stage IIA	T3	MX	N0
TCGA-D5-6532	555	0	61	MALE	unknow	Stage IIA	T3	M0	N0
TCGA-DM-A1D6	570	1	88	MALE	unknow	Stage IIA	T3	M0	N0
TCGA-AY-A8YK	573	0	44	MALE	unknow	Stage IVA	T3	M1	N2a
TCGA-AA-A00D	578	0	70	MALE	unknow	Stage I	T2	M0	N0
TCGA-AA-3688	578	0	80	MALE	unknow	Stage IV	T3	M1	N1
TCGA-AA-3713	579	0	68	MALE	unknow	Stage IV	T3	M1	N0
TCGA-AA-3715	579	1	77	MALE	unknow	Stage II	T3	M0	N0
TCGA-AA-3530	580	0	80	MALE	unknow	Stage I	T2	M0	N0
TCGA-AA-3526	580	0	57	MALE	unknow	Stage I	T2	M0	N0
TCGA-AA-3986	580	0	73	MALE	unknow	Stage I	T2	M0	N0
TCGA-AY-A71X	588	0	54	FEMALE	unknow	Stage I	T2	M0	N0
TCGA-NH-A50V	588	0	69	MALE	unknow	Stage IIIB	T3	M0	N2a
TCGA-F4-6856	591	0	45	MALE	unknow	Stage I	T2	M0	N0
TCGA-A6-2679	595	0	73	FEMALE	unknow	Stage IIB	T3	unknow	N0
TCGA-D5-5539	596	0	60	MALE	unknow	Stage IIIA	T3	M0	N1
TCGA-CM-4751	607	0	62	MALE	unknow	Stage IIIB	T3	M0	N1b
TCGA-AA-3560	608	0	72	FEMALE	unknow	Stage IIIC	T3	M0	N2
TCGA-AA-3562	608	0	82	MALE	unknow	Stage IIIC	T3	M0	N2
TCGA-D5-6529	614	0	69	MALE	unknow	Stage IIA	T3	M0	N0
TCGA-D5-6530	621	0	53	MALE	unknow	Stage I	T2	M0	N0
TCGA-AA-3955	638	0	38	MALE	unknow	Stage IIIB	T2	M0	N2a
TCGA-AA-3558	638	0	70	MALE	unknow	Stage I	T2	M0	N0
TCGA-AA-3549	639	0	69	MALE	unknow	Stage I	T2	M0	N0
TCGA-CK-5916	643	1	71	FEMALE	unknow	Stage I	T1	M0	N0
TCGA-A6-2671	648	0	85	MALE	unknow	Stage IV	T3	M1	N2
TCGA-AD-6548	650	0	81	FEMALE	unknow	Stage I	T2	M0	N0
TCGA-QL-A97D	666	0	84	FEMALE	unknow	Stage I	T2	MX	N0
TCGA-AA-3968	669	0	55	FEMALE	unknow	Stage I	T2	M0	N0
TCGA-AA-A00Z	669	0	70	MALE	unknow	Stage IIA	T3	M0	N0
TCGA-CK-5914	669	0	81	MALE	unknow	Stage IIIB	T3	MX	N1
TCGA-AA-A02R	670	1	84	FEMALE	unknow	Stage IIA	T3	M0	N0
TCGA-G4-6321	672	0	60	FEMALE	unknow	Stage III	T2	MX	N1
TCGA-AD-6901	682	1	78	MALE	unknow	unknow	T3	MX	N0
TCGA-CM-4746	699	0	61	MALE	unknow	Stage I	T2	M0	N0
TCGA-AA-3556	700	0	78	MALE	unknow	Stage I	T2	M0	N0
TCGA-AA-3950	730	0	79	FEMALE	unknow	Stage IIA	T3	M0	N0
TCGA-AA-3979	730	0	84	MALE	unknow	Stage IIA	T3	M0	N0
TCGA-AA-3941	730	0	84	FEMALE	unknow	Stage IVA	T4	M1a	N1b
TCGA-AA-3553	730	0	61	FEMALE	unknow	Stage I	T2	M0	N0
TCGA-AA-3867	731	0	74	MALE	unknow	Stage IV	T3	M1	N2
TCGA-AA-3520	731	0	86	FEMALE	unknow	Stage II	T3	M0	N0
TCGA-DM-A0XD	743	1	65	MALE	unknow	Stage IIA	T3	M0	N0
TCGA-AD-6890	746	0	65	MALE	unknow	unknow	T1	MX	N0
TCGA-A6-A566	758	1	55	FEMALE	unknow	Stage IIIB	T4	M0	N1
TCGA-AA-3819	761	0	41	FEMALE	unknow	Stage IIA	T3	M0	N0
TCGA-AA-3977	761	0	65	MALE	unknow	unknow	T2	unknow	N0
TCGA-AD-6895	763	0	84	MALE	unknow	Stage IIIB	T3	M0	N1a
TCGA-D5-6533	775	0	68	FEMALE	unknow	unknow	T4b	M0	N0
TCGA-AA-3949	791	0	87	FEMALE	unknow	Stage IIIB	T3	M0	N1
TCGA-AA-A01X	791	0	80	FEMALE	unknow	Stage III	T2	M0	N1
TCGA-AA-3538	791	0	54	FEMALE	unknow	Stage I	T2	M0	N0
TCGA-G4-6322	792	0	65	MALE	unknow	Stage IIIB	T3	MX	N1
TCGA-G4-6588	796	0	58	FEMALE	unknow	Stage IIA	T3	M0	N0
TCGA-G4-6320	804	0	73	MALE	unknow	Stage III	T3	MX	N1
TCGA-AD-6965	805	0	62	MALE	unknow	Stage IIIC	T4a	M0	N2b
TCGA-DM-A28A	805	1	78	MALE	unknow	Stage IIIC	T3	M0	N2
TCGA-AA-3710	821	0	80	FEMALE	unknow	Stage IIA	T3	M0	N0
TCGA-AA-3994	822	0	69	MALE	unknow	Stage IIIB	T3	M0	N1
TCGA-AA-A00O	822	0	83	FEMALE	unknow	Stage IIIC	T3	M0	N2
TCGA-AA-3869	822	1	76	MALE	unknow	Stage IV	T4	M1	N2
TCGA-AA-3982	822	0	75	MALE	unknow	Stage IIIB	T3	M0	N1
TCGA-AU-6004	824	0	69	FEMALE	unknow	Stage I	T2	M0	N0
TCGA-AD-6963	834	0	58	MALE	unknow	unknow	T3	MX	N0
TCGA-A6-2675	846	0	78	MALE	unknow	Stage IIA	T3	MX	N0
TCGA-G4-6294	858	1	75	MALE	unknow	Stage IV	T3	M1	N1
TCGA-AA-3534	882	0	78	FEMALE	unknow	Stage IIA	T3	M0	N0
TCGA-AA-3532	882	0	63	MALE	unknow	Stage IIA	T3	M0	N0
TCGA-QG-A5YW	896	0	55	FEMALE	unknow	Stage IIIC	T3	MX	N2b
TCGA-AZ-6603	899	1	77	FEMALE	unknow	unknow	T2	MX	N1
TCGA-AA-3555	911	0	81	FEMALE	unknow	Stage IIA	T3	M0	N0
TCGA-AA-3870	912	0	71	FEMALE	unknow	Stage IV	T3	M1	N2
TCGA-AA-A00E	913	0	65	MALE	unknow	Stage IIA	T3	M0	N0
TCGA-AA-3862	914	0	82	MALE	unknow	Stage IIA	T3	M0	N0
TCGA-AA-3861	914	0	72	MALE	unknow	Stage IIA	T3	M0	N0
TCGA-AA-3967	943	0	77	MALE	unknow	Stage IIIB	T3	M0	N1
TCGA-AA-3877	943	0	83	FEMALE	unknow	Stage I	T1	M0	N0
TCGA-AA-A01K	943	0	74	FEMALE	unknow	Stage IIIC	T3	M0	N2
TCGA-AA-A01I	943	0	76	MALE	unknow	Stage I	T2	M0	N0
TCGA-AA-3860	945	0	53	FEMALE	unknow	Stage IIIB	T3	M0	N1
TCGA-AA-3858	945	0	67	MALE	unknow	Stage I	T2	M0	N0
TCGA-QG-A5Z2	952	0	61	MALE	unknow	Stage I	T2	M0	N0
TCGA-AA-A01F	974	0	72	MALE	unknow	Stage IIIB	T3	M0	N1
TCGA-AA-3855	975	0	72	MALE	unknow	Stage I	T2	M0	N0
TCGA-AZ-4615	1002	0	84	MALE	unknow	Stage IIIB	T3	M0	N1
TCGA-QG-A5YX	1003	0	61	FEMALE	unknow	Stage IIA	T3	MX	N0
TCGA-AA-3947	1004	0	60	FEMALE	unknow	Stage IIB	T4	M0	N0
TCGA-AA-A01T	1005	0	63	FEMALE	unknow	Stage III	T3	M0	N1
TCGA-AA-3815	1005	0	65	FEMALE	unknow	Stage IIA	T3	M0	N0
TCGA-AA-3851	1006	0	74	MALE	unknow	Stage IIA	T3	M0	N0
TCGA-F4-6808	1024	0	54	FEMALE	unknow	Stage I	T1	M0	N0
TCGA-AA-3548	1034	0	71	FEMALE	unknow	Stage IIIC	T3	M0	N2
TCGA-AA-A00F	1035	0	66	MALE	unknow	Stage IIIC	T3	M0	N2
TCGA-AA-3956	1035	0	65	MALE	unknow	Stage IIA	T3	M0	N0
TCGA-AA-3531	1035	0	75	FEMALE	unknow	Stage IIA	T3	M0	N0
TCGA-AA-3975	1036	0	80	MALE	unknow	Stage I	T2	M0	N0
TCGA-AA-A010	1064	0	46	FEMALE	unknow	Stage IIB	T4	M0	N0
TCGA-AA-3502	1065	0	73	MALE	unknow	Stage I	T2	M0	N0
TCGA-AA-A01R	1065	0	47	MALE	unknow	Stage III	T3	M0	N2
TCGA-AA-3812	1066	0	82	FEMALE	unknow	Stage IIA	T3	M0	N0
TCGA-F4-6855	1077	0	70	FEMALE	unknow	Stage IIA	T3	M0	N0
TCGA-G4-6586	1089	0	73	FEMALE	unknow	Stage IIA	T3	M0	N0
TCGA-F4-6703	1091	0	64	MALE	unknow	Stage IIA	T3	M0	N0
TCGA-G4-6314	1093	0	76	FEMALE	unknow	Stage IV	T3	M1	N2
TCGA-DM-A28F	1094	1	73	MALE	unknow	Stage IIIB	T3	M0	N1
TCGA-AA-3692	1095	1	47	FEMALE	unknow	Stage IV	T3	M1	N2
TCGA-G4-6317	1095	0	51	FEMALE	unknow	Stage IIIC	T3	MX	N2
TCGA-AA-3970	1096	0	65	MALE	unknow	Stage IIA	T3	M0	N0
TCGA-AA-3854	1096	0	71	FEMALE	unknow	Stage I	T2	M0	N0
TCGA-AA-3524	1096	0	85	MALE	unknow	Stage II	T3	M0	N0
TCGA-G4-6315	1117	0	66	MALE	unknow	Stage IV	T3	M1	N1
TCGA-AA-3841	1124	0	66	MALE	unknow	Stage IIA	T3	M0	N0
TCGA-AA-A01Z	1126	0	68	MALE	unknow	Stage II	T3	M0	N0
TCGA-AA-3842	1126	0	51	MALE	unknow	Stage IIIA	T2	M0	N1
TCGA-AA-3495	1127	0	79	MALE	unknow	Stage I	T2	M0	N0
TCGA-AA-3685	1127	0	69	MALE	unknow	Stage II	T3	M0	N0
TCGA-AA-3522	1127	0	67	MALE	unknow	Stage IIA	T3	M0	N0
TCGA-AA-A00L	1157	0	66	MALE	unknow	Stage IIA	T3	M0	N0
TCGA-AA-A00A	1157	0	80	MALE	unknow	Stage IIA	T3	M0	N0
TCGA-AA-A01P	1158	1	80	FEMALE	unknow	Stage III	T3	M0	N1
TCGA-DM-A0XF	1162	1	68	FEMALE	unknow	Stage IIIC	T3	M0	N2
TCGA-RU-A8FL	1177	0	51	MALE	unknow	Stage IIIB	T3	MX	N2a
TCGA-AA-3517	1186	0	60	MALE	unknow	Stage IIA	T3	M0	N0
TCGA-AA-3837	1186	0	67	MALE	unknow	Stage IIA	T3	M0	N0
TCGA-AA-A024	1188	1	81	MALE	unknow	Stage II	T3	M0	N0
TCGA-G4-6311	1199	0	80	MALE	unknow	Stage III	T3	MX	N1
TCGA-5M-AATE	1200	0	76	MALE	unknow	Stage IIA	T3	M0	N0
TCGA-AA-A02F	1216	0	68	FEMALE	unknow	Stage IV	T3	M1	N1
TCGA-AA-A02Y	1216	0	73	MALE	unknow	Stage I	T2	M0	N0
TCGA-CK-4950	1227	0	68	FEMALE	unknow	Stage IIIB	T3	M0	N1
TCGA-AA-A03J	1246	0	65	FEMALE	unknow	Stage I	T2	M0	N0
TCGA-AA-A02W	1247	0	73	FEMALE	unknow	Stage I	T2	M0	N0
TCGA-AA-A00Q	1278	0	66	FEMALE	unknow	Stage IIIB	T4	M0	N1
TCGA-QG-A5YV	1301	0	64	FEMALE	unknow	Stage IIIC	T4b	MX	N1a
TCGA-D5-6534	1316	0	62	FEMALE	unknow	Stage IIA	T3	M0	N0
TCGA-DM-A1DB	1348	1	68	MALE	unknow	Stage IIA	T3	M0	N0
TCGA-G4-6306	1359	0	71	MALE	unknow	unknow	T2	M0	N0
TCGA-G4-6310	1372	0	69	MALE	unknow	Stage IIIB	T3	M0	N1
TCGA-D5-5537	1381	1	83	MALE	unknow	unknow	T3	MX	N2
TCGA-AA-3678	1430	0	60	FEMALE	unknow	Stage III	T2	M0	N1
TCGA-AA-3675	1431	0	84	MALE	unknow	Stage II	T3	M0	N0
TCGA-G4-6627	1434	0	84	MALE	unknow	Stage IIA	T3	M0	N0
TCGA-CK-5912	1493	1	81	MALE	unknow	Stage I	T2	MX	N0
TCGA-AZ-6598	1503	1	77	FEMALE	unknow	Stage II	T3	MX	N0
TCGA-AA-3673	1522	0	53	FEMALE	unknow	Stage II	T3	M0	N0
TCGA-AZ-4313	1532	0	51	FEMALE	unknow	Stage I	T1	M0	N0
TCGA-AA-3972	1551	0	72	MALE	unknow	Stage IV	T3	M1	N1
TCGA-CK-5913	1561	0	58	FEMALE	unknow	Stage IIA	T3	MX	N0
TCGA-G4-6309	1574	0	40	FEMALE	unknow	Stage IIIB	T3	M0	N1
TCGA-AA-A029	1581	0	67	MALE	unknow	Stage II	T3	M0	N0
TCGA-G4-6628	1606	0	78	MALE	unknow	Stage I	T2	M0	N0
TCGA-AA-3864	1612	0	71	MALE	unknow	Stage II	T3	M0	N0
TCGA-G4-6304	1631	0	66	FEMALE	unknow	Stage IIB	T4	M0	N0
TCGA-AA-3664	1643	0	74	FEMALE	unknow	Stage II	T3	M0	N0
TCGA-G4-6307	1674	0	37	FEMALE	unknow	Stage IIIB	T3	M0	N1
TCGA-A6-A56B	1711	1	57	MALE	unknow	Stage IIIB	T3	M0	N1
TCGA-AA-3506	1765	0	77	MALE	unknow	Stage I	T2	M0	N0
TCGA-AZ-4315	1776	0	61	MALE	unknow	Stage IIA	T3	M0	N0
TCGA-SS-A7HO	1829	0	44	FEMALE	unknow	Stage IIB	T4a	M0	N0
TCGA-DM-A28G	1849	1	75	MALE	unknow	Stage IIA	T3	M0	N0
TCGA-AA-3655	1856	0	68	MALE	unknow	Stage II	T3	M0	N0
TCGA-AZ-5407	1868	0	51	FEMALE	unknow	Stage I	T1	M0	N0
TCGA-A6-A567	1881	1	56	MALE	unknow	Stage IV	T3	M1	N1
TCGA-AZ-5403	1910	1	43	MALE	unknow	Stage II	T3	MX	N0
TCGA-AA-3509	1915	0	54	FEMALE	unknow	Stage II	T3	M0	N0
TCGA-AA-3510	1946	0	70	MALE	unknow	Stage II	T3	M0	N0
TCGA-G4-6303	2003	1	54	FEMALE	unknow	Stage IV	T3	M1	N1
TCGA-AZ-4308	2048	0	47	FEMALE	unknow	Stage IIIB	T3	M0	N1
TCGA-AD-6889	2056	0	76	MALE	unknow	Stage IIA	T3	M0	N0
TCGA-WS-AB45	2130	0	52	FEMALE	unknow	Stage IIA	T3	MX	N0
TCGA-CK-4951	2134	1	79	FEMALE	unknow	Stage IIA	T3	M0	N0
TCGA-G4-6299	2268	0	69	MALE	unknow	Stage IIIC	T3	M0	N2
TCGA-AA-3660	2375	0	51	FEMALE	unknow	Stage II	T3	M0	N0
TCGA-DM-A28C	2475	1	74	MALE	unknow	Stage IIA	T3	M0	N0
TCGA-G4-6297	2506	0	55	FEMALE	unknow	Stage IV	T3	M1	N2
TCGA-AZ-4681	2549	0	79	FEMALE	unknow	Stage IIA	T3	M0	N0
TCGA-AA-3697	2587	0	77	MALE	unknow	Stage II	T3	M0	N0
TCGA-DM-A1HA	2600	0	82	MALE	unknow	Stage IIIC	T3	M0	N2
TCGA-G4-6625	2792	0	77	FEMALE	unknow	Stage IIA	T3	M0	N0
TCGA-DM-A1D4	2821	1	80	MALE	unknow	Stage IIA	T3	M0	N0
TCGA-DM-A28M	2895	0	63	MALE	unknow	Stage IIA	T3	M0	N0
TCGA-DM-A28K	2988	0	75	MALE	unknow	Stage IIA	T3	M0	N0
TCGA-AZ-6601	3042	1	68	MALE	unknow	Stage II	T3	M0	N0
TCGA-CK-4948	3116	0	45	FEMALE	unknow	Stage III	T3	M0	N1
TCGA-G4-6293	3275	0	49	FEMALE	unknow	Stage III	T3	M0	N1
TCGA-DM-A28H	3561	0	50	MALE	unknow	Stage IIIC	T3	M0	N2
TCGA-DM-A0X9	3641	0	71	FEMALE	unknow	Stage IIA	T3	M0	N0
TCGA-DM-A28E	3648	0	72	FEMALE	unknow	Stage IIA	T3	M0	N0
TCGA-DM-A1D0	3974	0	79	FEMALE	unknow	Stage IIA	T3	M0	N0
TCGA-DM-A1HB	4126	0	75	MALE	unknow	Stage IIIB	T3	M0	N1
TCGA-DM-A282	4233	0	60	FEMALE	unknow	Stage IIA	T3	M0	N0
TCGA-DM-A1D9	4270	0	67	FEMALE	unknow	Stage IIA	T3	M0	N0
TCGA-AA-3521		0	87	MALE	unknow	Stage II	T3	M0	N0
