# Supplementary material for: A Novel Prognostic Chemokine-Related lncRNAs Signature Associated with Immune Landscape in Colon Adenocarcinoma
Source: Dis Markers. 2022 Nov 3;2022:2823042. doi: 10.1155/2022/2823042 (PMC9649319; doi:10.1155/2022/2823042)
Supplement: Supplementary Materials — Supplementary Figure S1: (A) Heatmap of the expression of prognostic chemokine-related lncRNAs between tumor tissues and normal tissues. (B) Boxplot of the expression of prognostic chemokine-related prognostic lncRNAs in COAD tissues and normal tissues. (C) Barplot showed the proportion of 22 kinds of TIICs in each COAD sample. (D) Correlation between 22 kinds of TIICs was visualized. ∗p < 0.05; ∗∗p < 0.01; ∗∗∗p < 0.001. Supplementary Figure S2: Survival analysis was conducted in high-risk and low-risk patients with different clinical parameters. Supplementary Figure S3: Risk stratification showed the differences in drug susceptibility between high-risk and low-risk groups. Supplementary Table S1: Clinical information of the COAD patients. Supplementary Table S2: The 64 chemokine genes. Supplementary Table S3: Expression of 52 chemokine-related lncRNAs in COAD. Supplementary Table S4: Immune cell content of COAD samples was calculated using the CIBERSORT algorithm. Supplementary Table S5: Immune, Stromal, and ESTIMATE scores for COAD samples. Supplementary Table S6: Expression of 10 chemokine-related lncRNAs and risk score in the entire cohort. Supplementary Table S7: The immune cell infiltration status in all tumor samples in RNA-seq. Supplementary Table S8: Tumor mutation burden data of the low-risk group. Supplementary Table S9: Tumor mutation burden data of the high-risk group. Supplementary Table S10. The immunotherapy score data was obtained from the TCIA database. Supplementary Table S11: Quantitative real-time PCR primer sequences of model lncRNAs. Supplementary Table S12: The correlation values of immune cell infiltration and patient risk score. Supplementary Table S13: The correlation values of chemokine-related lncRNAs and immune cells. [file 2823042.f1.zip › Supplementary Table 3 (1).txt]

id	futime	fustat	AC008556.1	U62631.1	CYTOR	AL513318.2	LINC01301	MIR4435-2HG	AP003555.2	VIM-AS1	LINC02257	AL512306.3	AC004846.1	LINC01857	ATP2B1-AS1	AL662844.4	MYOSLID	AC138207.5	LINC02381	U62317.4	SNHG26	AC022706.1	AL512306.2	AL391422.4	AC025171.4	DUBR	LINC01679	AC019205.1	AC104971.3	AC243960.1	LINC02593	LINC00861	LINC01480	LINC00926	LINC02387	AC008972.2	AL356417.2	AL161935.3	LINC01215	AC015819.1	LINC01503	AC002091.2	AC138466.1	AC004540.2	PCED1B-AS1	AL137782.1	AC083967.1	LINC02084	AC024940.1
TCGA-D5-6532	1.52054794520548	0	0.04051791	0	1.680157	0	0.2380015	0.9845852	0.09129956	0.07261493	0.04141109	0.06050991	0	0	0.1080998	0.1456246	0.0343258	0.5557591	0.2867922	0	0.02359817	0.1736482	0.009312363	0.1571702	0.1578921	0.08843424	0.08862388	0.03723267	0	0.1148007	0.03981529	0.02166052	0.3600023	1.058833	0.5237453	0.08366046	0.1005554	0.05955082	0.05580592	0.1870057	0.3370561	0.05140332	0	0.0937149	0.2806901	0.9496204	0	0.01885414	0.01135392
TCGA-DM-A0XD	2.03561643835616	1	0.1833802	0	4.670011	0.03541567	0.1166686	3.988258	0.8395443	0.09837093	0.6247423	0.07824633	0.08176955	0.03620748	0.0931904	0.07532381	0.177549	0.08711042	0.4554367	0.4921017	0.8069569	0.2245472	0.008027977	0.3871224	0.3743169	0.09317874	0.03820032	0.01069915	0.07154249	0.111338	0.07722868	0.006224347	0.1862099	0.3301601	0.0615694	0.3606089	0.1300298	0.05133741	0.01374543	0	1.251679	0.04431363	0.4100428	0.1211842	0.3687261	0.2515631	0.1037713	0	0.3197399
TCGA-AA-3492	0.00273972602739726	1	0.045404394	0	2.505912659	0.506398909	0.03137702	1.819808119	1.22772412	0.11624619	0.232026463	0	0.030368841	0.094131061	0.051004936	0.261099265	0.076931033	0.45293381	0.811906187	0	0.141035347	0.389180522	0.146096158	0.201285688	0.221167536	0.110110514	0.115863965	0.020861478	0	0.128645784	0.078079811	0.00809093	0.053789178	0.214584954	0	0.093749964	0	0	0	0.069852914	0.842573388	0	0.236892491	0	1.318078403	0.487733177	0	0.380303229	0.042410698
TCGA-AA-A022	0	0	0.021284166	0	2.952439025	0.107901837	0.078445707	2.048388154	0.767358451	0.479534829	0.3480537	0.381432202	0.256247404	0.264754262	0.298869074	1.070958045	0.108188619	1.804730766	0.380596339	0.23988784	0.413206119	0.972990454	2.250232261	0.66049524	0.870882215	0.237435349	0.434507353	0.143428435	0	0.512593669	2.018304892	0.075855519	0.201717533	1.254425755	0.050022695	0.527364765	0.052822018	0	0.050254281	0.130979484	0.817183796	0	1.221526059	0.246143418	1.839579745	0.207849205	0	0.871563302	0.015904652
TCGA-AD-6899	0.482191780821918	1	0.2791191	0.1189975	4.019092	0.008575862	0.5572296	2.117245	0.3811775	0.4157743	0.6051225	0.126315	0.3790362	0.8066191	0.2090319	0.5775864	0.1003176	1.392183	1.399024	0.5243121	0.4729097	1.014979	0.1321896	0.6436897	0.3131214	0.9435487	0.3453394	0.145084	0.2078872	0.4193835	0.7023202	0.2321116	0.2104224	0.7524507	0	1.152638	0.2309014	0.09945034	0.1464514	0.1561505	0.790206	0.2146099	0.264777	0.3716985	1.908501	0.4831959	0.1675207	0.1574328	0.06320379
TCGA-AA-3844	1.24383561643836	0	0.068224066	0	3.315658031	0.023057835	0.240972086	2.559766963	0.068324543	0.093157359	0	0.0679244	0.015210611	0.094293425	0.204371652	0.29424333	0.077063729	0.567143826	0.23721443	0	0	0.259901205	0.125441275	0.722517818	0.221549021	0.077210308	0.19896654	0.146282232	0.372629438	0.257735361	0.022346997	0.121573284	0	1.226508423	0.10689485	0.18782334	0	0.133695576	0.089491445	0	2.619393256	0	0.11865055	0.262995266	0.525139966	0.455262557	0	0.0423288	0.110458012
TCGA-AD-6901	1.86849315068493	1	0.073804544	0	6.963168295	0.024943882	0.158676436	3.188356302	1.1086986	0.491289284	0.176006828	0.110220549	0.23036697	0.459028262	0.25563358	0.87535622	0.125050889	2.822256892	2.181250439	0.346595925	0.152834686	0.808335482	0.09046794	2.090371367	0.671078567	0.298306526	0.206272886	0.097962788	0.100777289	0.348521458	0.767553037	0.276186816	0.612037682	1.183206127	0.028909614	0.507966497	0.641075966	0.723156916	0.106492668	0.529878778	2.093752498	0.062421754	0	7.567894515	1.647474007	0.492501361	1.413034571	0.297642413	0.082725972
TCGA-AA-A01P	3.17260273972603	1	0.042144866	0.197644887	4.81373388	0.021365687	0.087373502	3.287299525	7.913800261	0.625825867	0.818404306	0.125879247	0.155037834	0.786361519	0.082850865	0.49985771	0.142816488	2.627613876	1.318835681	0.712504359	0.114546761	2.348071089	0.135608085	1.883925869	0.492696424	0.286176264	0.384093665	0.083910048	0.690566474	0.716462717	0.393433284	0.180242193	0.674024159	0.351494383	0	0.609138342	0.104593097	0.247768087	0.149263066	0.453867784	8.926568105	0	1.649146919	0.194955841	2.905705844	0.380695843	0.250414153	0.353001704	0.0472393
TCGA-G4-6293	8.97260273972603	0	0.132421539	0.338733466	2.074938507	0.195293649	0.022184441	1.193238449	0.180840768	0.172597625	0.123036955	0.035956334	0.056363028	0.249574962	0.324557396	0.294213529	0.081588626	0.480355527	0.574040644	0.542722128	0.186967463	0.515928074	0.066403361	0.55146937	0.211101802	0.110938029	0.403744142	0.058998622	0.295881642	0.784497299	0.561904323	0.368973299	0.270967102	0.836678124	0.05658566	0.745693613	0.029876127	0.070772842	0.161068286	0.296327919	1.15549763	0.183269972	0.12561727	0.083531212	1.532900397	0.83467234	0.047685779	0.246478047	0.242883062
TCGA-AA-3715	1.58630136986301	1	0.254055364	0	5.904802416	0.450784121	0.058522238	3.338287489	2.28986573	0.813053689	0.843881296	0	0.148684861	0.131675036	0.374577774	0.251101232	0.322844442	0.316792753	1.135733258	0.357923304	0.295930497	1.088808705	0.058390372	0.539672116	0	0.92416716	0.300998404	0.107000795	0	0.224944854	0.514902671	0.04527192	0.150485756	0.353143189	0	0.262283878	0.157625591	0	0.149963236	0.293140805	1.300559457	0.483463567	0.994129687	0.661062428	2.975208521	0.279108215	1.00635523	0.059109597	0.106787008
TCGA-AY-A71X	1.61095890410959	0	0.07644382	0	0.4762992	0	0.277831	1.078367	0.8421204	0.3653339	0.05208597	0.1014774	0.1306646	0.03521802	0.3244091	0.842552	0.05756567	0.5931093	0.5569026	0.04786537	0.1517043	0.07280364	0.2030234	0.9037038	0.976417	0.3048544	0.01238546	0.0598389	0.06958741	0.04813129	0.1544096	0.03027125	0.07043604	1.383725	0.09981144	0.2806035	0.0210794	0	0.0133698	0.1306732	0.2282764	0.04310265	0.08863051	0.5500719	0.3082146	0.1658905	0	0.07904774	0.1015517
TCGA-DM-A28C	6.78082191780822	1	0.08208869	0	1.679778	0	0.176487	1.149242	0	0.03736299	0.01864406	0	0.04270406	0	0.08709116	0.1835763	0.01545413	0.3184533	0.1223235	0	0.08499476	0.0260599	0.05031123	0.4784791	0.3198872	0.05751023	0.1729007	0.01955667	0	0.09044958	0.05825819	0.003250659	0.0864426	0.6136329	0.02143637	0.1883276	0.02263597	0.05362182	0.01435708	0.02806451	0.3501902	0	0	4.620048	0.05415942	0.409723	0	0.01697698	0.01703917
TCGA-AA-3560	1.66575342465753	0	0.1737538	0	5.367463	0.02936197	0.7071009	2.001643	0	0.02965677	0	0	0.01936927	0	0.03253099	0.2914263	0.1472	0.8666447	0.4315287	0	0.02248812	0.5791792	0	0.6846943	0.338546	0.0842743	0.1266825	0.02661094	0.2372541	0.0410252	0.04268517	0.04128322	0.06861357	1.014392	0.4083614	0	0	0	0	0.0891045	0.5559249	0.1469559	0	0	1.089052	0.07069924	0	0	0.07573882
TCGA-AA-3552	1.08493150684932	1	0.3105503	0	1.497039	0.7609409	1.454565	1.428531	1.555038	0.371039	0	0	0.1384749	0.4292159	0.08721402	0.8929143	0	1.936194	0.7712718	0.7291928	0.02009652	0.2218217	0.1665412	1.701784	0.6555074	0.1882794	0.3584981	0.1347583	0.2120223	0.4766085	0.5467541	0.2121334	0.2759245	1.194294	0.1824662	0.1068695	0.06422574	0.3042856	0.1222073	0.4777697	2.285292	0	1.620263	0.3591398	1.707424	0.6191681	0	0.1445079	0.0386766
TCGA-CM-6166	1.16164383561644	0	0.0275303	0	2.843842	0	0.1585417	2.025129	0	0.1409684	0.1125487	0.08222814	0.03682742	0	0.2242143	0.12863	0.1399381	0.3432874	0.5127997	0.07757157	0.08551476	0.039329	0.1138928	0.4271634	0.1072814	0.2537029	0.1304688	0.08432705	0.1127747	0.03900126	0.2975819	0.01962328	0.1630715	0.6658597	0.06470255	0.3410637	0.2049701	0	0.01083368	0.08470862	0.2818661	0	0	1.400862	0.1634723	0.3360568	0	0	0.2057209
TCGA-AZ-5403	5.23287671232877	1	0.343612	0	4.364042	0.05619256	0.05106569	3.381142	0.1998105	0.2837837	0.3172008	0	0.09637853	0.6434277	0.4046731	0.2629289	0.1502451	0.3870005	0.8754054	0.1873913	0.08607494	0.2533545	0.02038025	1.031908	0.1079842	0.2741812	0.145466	0.1018553	0	0.1413243	0.08169034	0.02370219	0.02626235	0.9059546	0.1042022	0.0915461	0.4951508	0.5213115	0.008723722	0.03410541	1.106479	0.05624847	0.05783091	0.1794594	0.4753469	0.5520374	0	0.04126257	0.1076756
TCGA-G4-6299	6.21369863013699	0	0.1572825	0	3.435093	0.2505978	0.09833961	2.302616	1.215109	0.3796707	0.5511416	0.1006661	0.1427698	1.117966	0.3281255	0.6783431	0.1713162	0.7284547	1.272309	0.3798614	0.322793	0.5777724	0.09295392	0.5893516	0.350232	0.5884872	0.2621107	0.09979442	0	0.5252112	0.4802246	0.1681637	0.4125827	0.343556	0.02640358	1.25262	0.7527911	0.198141	0.1768388	0.7604868	1.107095	0.3420643	0.2344584	0.2858292	1.667729	0.9105885	0.9345329	0.3763955	0.0503699
TCGA-AA-3496	0.0849315068493151	0	0.08637537	0.09001571	3.110113	0.8465816	1.08769	1.842674	0.1730052	0.1474278	0.1765589	0.1719919	0.3979875	1.193806	0.2856983	0.5932853	0.09756686	1.148856	1.387222	0.2704201	0.3130162	0.5209943	0.105877	0.475101	0.2056949	0.3584256	0.3358699	0.09113077	0.07862818	0.6526139	0.2452017	0.2804735	0.2046524	0.4108853	0.04511156	0.6737512	0.2858163	0.2821097	0.113301	0.2657704	0.6264111	0.1948101	0	0.088791	1.101761	0.4826656	0	0.1786352	0.1398458
TCGA-A6-5661	0.838356164383562	0	0.028375299	0	3.06913223	0.2067255	0.0320557685	2.739387144	2.2410200415	0.5976975465	7.210575795	0.0296889655	0.059835433	0.247287358	0.0446642365	0.0397548115	0.2734878	1.3919584725	0.2221792915	0.0560153685	1.0889177895	0.267489242	0.09372055	0.622606976	0.077469201	0.92174004	0.071418356	0.216033425	0.0814359975	0.3410748825	0.2811629995	1.0143373075	0.214770277	0.472732811	0.023361248	0.2052384955	0.049337137	0.058436782	0.046938804	0.0917536805	0.3101925335	0.64666	0.051860776	0.147567604	0.9015143235	2.893886126	0	0.9198134265	0.051993752
TCGA-G4-6304	4.46849315068493	0	0.06110847	0	1.034035	0	0.2909139	0.7479677	0.1835954	0.04172064	0.04163703	0	0.06812092	0.3378354	0.1487332	0.4392575	0	0.5079922	0.1517668	0	0.7908976	0.2327942	0.09363173	0.07525129	0.4762609	0.3062688	0.07425618	0.01247861	0	0	0.4203415	0.0217787	0.1447866	0.4077229	0.09574599	0.1682338	0	0	0.03206309	0.06267535	0.547446	0	0	0.2826786	0.4300518	0.1889711	0	0.07582803	0.06849521
TCGA-CM-5864	0.167123287671233	0	0.08894802	0	2.318928	0.01503098	0.5327239	1.974646	0.04453951	0.09109134	0	0	0.3172965	0.3073407	0.1831859	0.2664053	0.02511821	0.5175948	0.6406336	0.08354234	0.03453634	0.2964934	0.01362881	0.8762717	0.2310779	0.1509959	0.09727696	0.02724534	0	0.2520194	0.08012177	0.07396795	0.01756233	0.5934716	0.06968278	0.3060964	0.03679115	0.08715368	0.04667026	0.09122874	0.7968492	0	0	1.577264	0.4694798	0.6659392	0	0	0.2603277
TCGA-AY-A8YK	1.56986301369863	0	0.2106887	0.1040061	1.178194	0.0112432	0.08684787	1.25881	0.06663127	0.09084866	0	0.03312052	0.04450095	0.09195657	0.6228336	0.2869512	0.03757694	0.6083973	0.2809075	0	0.04305542	0.1900951	0.0407775	0.4833965	0.1512409	0.1021885	0.1131874	0.04075913	0.1816973	0.2199295	0.1198625	0.1027523	0.2233231	1.263933	0.2084914	0.09158428	0.08255955	0.1303822	0.1396378	0.1705982	0.5818532	0.2250877	0.05785503	0.3334208	0.4535969	0.4060792	0.08784977	0.06191966	0.04143098
TCGA-DM-A28K	8.18630136986301	0	0.1015719	0	1.965213	0	1.325849	1.235115	1.593637	0.1040195	0.7612807	0.1011258	0.04529109	0	0.1331174	0.5678675	0.05736621	0.6754906	0.3531647	0	0.1226957	0.03224506	0.1660061	0.5169954	0.989526	0.06568608	0.1316539	0.1590175	0	0.07994088	0.08872051	0.008044365	0.0133699	0.7718249	0.07957249	0.233026	0	0.06634862	0.00888232	0.03472545	0.2888704	0	0.05888228	0.1566189	0.2903932	0.4243104	0.0894096	0.06301909	0.05903326
TCGA-CK-5913	4.27671232876712	0	0.093985335	0.044075881	2.840445679	0.019058656	0.264126809	1.310531511	0.028237126	0.202125088	0.403440055	0.028071755	0.081721019	0.155878117	0.147809536	0.202674507	0.111470979	0.843799878	0.434158699	0.052964111	0.226251716	0.295382481	0.017280765	0.291657497	0.109873973	0.218807513	0.137047951	0.020151811	0	0.14646048	0.129297744	0.03014624	0.055670756	0.334443318	0.044177439	0.194058789	0.093299311	0.110507253	0.07396994	0.144592823	0.613440041	0.143082152	0	0.152166733	0.620084357	0.284520468	0	0	0.03160386
TCGA-AZ-6605	0.435616438356164	1	0.3626211	0.1062855	3.806027	0.5744805	0.06264796	3.051457	0.3064122	0.5454335	0.6485758	0.06769282	0.3941275	1.127663	0.4964575	0.627208	0.09600123	1.808673	2.414715	0.5108751	0.1759962	0.7446684	0.0208356	1.046591	0.3532699	0.4671786	0.4709344	0.1631387	0.09283974	1.139801	0.5066608	0.2665493	0.3624632	0.8001829	0.133163	0.7487319	0.5062138	0.5995789	0.2051286	0.3835416	2.001355	0.2300209	0.05912301	0.4193578	2.041063	0.420512	0.4039881	0.1476457	0.2243967
TCGA-CM-4751	1.66301369863014	0	0.3363165	0.1911768	3.639536	0.2479977	0.08451412	1.543387	0.3980503	0.4383534	0.5208035	0.06087986	0.1635972	0.3803135	0.3091095	0.4981509	0.1554105	0.9149842	0.865637	0.05743225	0.3007377	0.4076563	0.2154939	0.6325244	0.5162868	0.2520956	0.2229143	0.0842857	0.08349588	0.5197618	0.5357853	0.2615154	0.1931751	0.9973081	0.02395216	0.5471177	0.2529255	0.2396596	0.2566725	0.34494	0.9782218	0.258588	0.1063451	0.1885757	1.566682	0.4329275	0.04036985	0.07587764	0.1523112
TCGA-CM-6677	0.419178082191781	0	0.1437753	0.0749174	3.309827	0	0.02943909	1.587279	0.4319612	0.2617596	0.09796314	0	0.1389042	0.06623795	0.1704825	0.3330102	0.02706733	0.7171189	1.071226	0.1800501	0.1240543	0.3651436	0.1028046	0.4013141	0.3423876	0.3021811	0.2212982	0.0636123	0	0.5657825	0.2197721	0.153722	0.1703261	0.2931151	0.112635	0.1979093	0.1982304	0	0.1131565	0.1966158	0.3884519	0.08106734	0.166696	0.03694906	1.254237	0.5304109	0	0.08920366	0.05968694
TCGA-G4-6627	3.92876712328767	0	0.203784	0.3716521	2.278812	0.09183112	0.1147474	1.77428	0.2380982	0.5217363	0.5785452	0.03381483	0.1893076	0.5633055	0.4260463	0.4882775	0.1534586	0.8470242	0.8603885	0.1913994	0.2813311	0.6145868	0.1457131	0.6357334	0.3088227	0.2361169	0.4870036	0.07629153	0.4637656	0.6415424	0.3226254	0.5043572	0.1877685	1.472977	0.1596465	0.2337604	0.1404837	0.3327886	0.2494887	0.278679	0.767919	0.05745156	0.1181357	0.3404102	1.74785	0.6301795	0.04484568	0.2739433	0.09728884
TCGA-A6-2677	1.48219178082192	0	0.148542255	0.04204957	2.0088175	1.151198	0.40050065	2.692372	0.57026897	0.510022495	2.00442285	0.29362825	0.36785745	0.32878237	0.49149125	0.30067585	0.166568205	1.6445146	0.52608465	0	2.95625005	0.268532	0.372733735	0.33053275	1.7575909	1.38716455	0.06513817	0.431367775	0.2469352	0.425461525	0.64469375	0.8301703	0.329422335	0.50965985	0.25211945	0.24001135	0.19947075	0.70243045	0.39281209	0.030913455	0.26863486	0.1984538	0.19839995	0.17840455	1.23712245	1.71849065	0.2302245	0	0.27721355
TCGA-AA-3526	1.58904109589041	0	0.1030339	0	5.479757	0.06268065	0.8117059	2.472813	0.3095569	0.2848949	0.3159155	0.09232319	0.1033717	0.3417709	0.1851887	0.4888119	0.06983027	0.4111279	0.322423	0.7548228	0.1040144	0.8242711	0.08525021	0.3958651	0.1405276	0.4847443	0.1802909	0.1199277	0	0.5108763	0.141746	0.08445754	0.2807404	1.489484	0.145292	0.3403872	0.1022818	0.3634394	0.07298233	0.1585137	0.8966663	0.2091434	0.1075136	0.2621406	0.9924842	0.2616045	0.04081342	0.1726006	0.08084197
TCGA-CA-5255	0.254794520547945	0	0.092704001	0.054343725	2.537691549	0	0.192191221	1.651985294	0.452597589	0.106805061	0.023686894	0	0.054254637	0	0.136682248	0.083296407	0.078536612	0.520185041	0.379890025	0.065302542	0.053992052	0.099325715	0.021306463	0.171238828	0.248361721	0.399050389	0.033794882	0.031945298	0	0.082081667	0.125257573	0.020649476	1.578713602	0.715177635	0.599158346	0.334972958	0.02875854	0	0	0.249587694	0.385588159	0.058804777	0.060459131	0.268021771	0.259942978	0.260272362	0.045901981	0.237257958	0.142876221
TCGA-AA-3977	2.08493150684932	0	0	0	2.487931	0	0.1745438	2.034493	0	0.9214808	0.09680359	0	0.0316754	0.3927235	0.3457956	0.476582	0.1604817	2.125892	0.4234185	0.2668784	0.2574305	0.1353081	0	0.1749547	0	0.1837565	0.1726411	0.05802401	0	0	0.4188294	0.1012683	0	0.500297	0.5565091	0.3911335	0	0	0.2236342	0.4371493	1.393996	0	0	0.4381405	0.9061092	0.231235	0.1875922	0.2644434	0.3361886
TCGA-AA-A01F	2.66849315068493	0	0.02571832	0	0.5920571	0	0.260668	1.93196	0.1545372	0.02633804	0	0	0.05160528	0	0.08667186	0.2957878	0.04357589	0.1282772	0.1916193	0	0	0.1469618	0.0236437	0.1140138	0.3507713	0.0374218	0	0.0472661	0	0.03643428	0.05054467	0.02749757	0.03046769	0.5433862	0.1813319	0	0	0.151197	0.02024127	0	0.3291428	0	0	0	0.1527129	0.4646287	0	0.04786986	0.06726329
TCGA-D5-5540	1.12602739726027	0	0.1257567	0	7.21529	0	0.1274607	2.508091	0.1133477	0.1803018	0.1542347	0	0.04205634	0.4171442	0.1412685	0.244069	0.1917685	0.1254492	0.1311764	0.1417368	0.1367191	0.3952353	0.02312246	0.06504185	0.1715192	0.4086644	0.04584411	0.3197166	0	0.2137864	0.04325158	0.03585516	0.07449003	0.7831259	0.4433358	0.2077277	0.06241938	0.2957276	0.0593851	0.03869437	0.2575093	0	0	0.2326927	0.5144148	0.7491222	0.5977716	0.1638509	0.03289021
TCGA-5M-AAT4	0.134246575342466	1	0.101227	0	3.34014	0	0.4337125	1.902258	0.3041283	0.1762326	0.7242094	0	0.2640532	0.04197218	0.1478271	0.2037381	0.01715142	0.7068567	0.2413477	0	0.6131421	0.05784401	0.1768166	0.2318579	0.4141897	0.270035	0.05904307	0.1085227	0.08293298	0.04302149	0.154181	0.03246905	0.2878092	0.3545843	0.04758137	0.2090113	0.02512204	0	0.01593388	0.06229355	0.2850106	0	0.0528141	0.3043697	0.1936802	0.1779347	0.0400977	0.03768305	0.0869885
TCGA-AA-3864	4.41643835616438	0	0.155561624	0	1.613488869	0	0.286671828	1.71740033	0.13353491	0.204827268	0.181703815	0.06637643	0.13377571	0.276433548	0.212196237	0.239614703	0.075307478	1.108437699	0.331154871	0.125235088	1.069956725	0.06349454	0.04086084	0.443334933	0.086600004	0.355696234	0.113418768	0.040842434	0	0.094448129	0.141945165	0.031680714	0.052654009	0.39540018	0	0.73417169	0.165456576	0.391946126	0.034980788	0.205136208	0.369734206	0.112773885	0.231893104	0.205601369	0.410537792	0.292974569	0.264087972	0.20682072	0.041515661
TCGA-CA-6717	1.06301369863014	0	0.1805116	0.348574	1.341301	0.08612878	0.225028	1.788976	0.2871171	0.5437095	0.1736384	0.1585753	0.376411	1.937197	0.3459142	0.3587333	0.1439295	1.271084	1.313291	0.5385428	0.4782491	1.243861	0.08785601	0.5727205	0.227579	0.6746652	0.2012852	0.1496132	0.5219611	0.6468331	0.537361	0.2611174	0.5534849	0.7320829	0.07486655	0.7015834	0.2898726	0.4369732	0.4094938	0.3920613	0.6794664	0.3233043	0	0.2947128	2.732193	0.1140619	0	0.7115054	0.07537845
TCGA-CM-6161	0.580821917808219	0	0.1011942	0.04745661	2.102591	0.2667665	0.09324131	1.12447	0.09120895	0.3938041	0	0.1511246	0.1218312	0.6713374	0.2103012	0.4291663	0.03429174	1.312309	0.5428565	0.05702659	0.3300465	0.404777	0.07442497	0.9121776	0.276037	0.2404987	0.4943256	0.1022882	0.08290613	0.573434	1.859517	0.2813073	0.2277752	0.270072	0.02378298	0.4596759	0.0753417	0	0.08760798	0.1868201	0.4662299	0.1027046	0.052797	2.317142	1.054881	0.5632775	0	0.03767085	0.03780884
TCGA-AA-3819	2.08493150684932	0	0.1476095	0	2.341636	0.01870797	0.04250275	1.470191	0.0554351	0.188958	0	0	0.3208693	0.2295148	0.3212702	0.3315753	0	1.196395	0.3849277	0	0.1002981	0.1054354	0.1526651	0.3271896	0.0719015	0.1252891	0.09416834	0.01695515	0	0.2875311	0.3807558	0.1315179	0.2185856	0.933573	0.08672911	0.3047808	0.04579128	0	0.1452177	0.1135458	0.9445529	0	0	0.4267623	0.596501	0.270276	0	0.03434346	0.04825696
TCGA-AA-3861	2.5041095890411	0	0.11458451	0	1.04836874	0.20331348	0.15836884	1.07938613	0.1721299	0.14668198	0	0	0	0.35632989	0.19307743	0.20591298	0	1.14304357	0.25612025	0	0.13347111	0.08184608	0	0.42331114	0.05581481	0.08336391	0.2715137	0.01754898	0	0.64931225	0.07037344	0.12251175	0.30542562	1.62460792	0	0.11829575	0	0.33681903	0.29309234	0	0.54991941	0	0	2.38522868	1.05838737	0.2098065	0	0.31991662	0.17124719
TCGA-D5-6926	0.753424657534247	0	0.1157215	0.09867166	2.105124	0.01066654	0.5185944	1.67144	0.1264276	0.3339828	0.8816679	0.09426539	0.1970198	0.7415416	0.1772667	0.5369053	0.1604234	1.25933	1.269794	0.2964238	0.114372	0.5109782	0.1450727	0.777294	0.1639816	0.2143047	0.2837956	0.2900147	0.0861891	0.2980706	0.1964165	0.07873564	0.1620175	0.6902175	0.07417426	0.4778784	0.8093597	0.3092376	0.05795818	0.2265876	1.35983	0.2135431	0.05488769	0.09732919	0.9647772	0.3441582	0.04167201	0.1762315	0.09433444
TCGA-AA-3531	2.83561643835616	0	0.138368644	0	1.633518719	0	0.012749414	1.381472546	0.582004195	0	0	0.247969577	0.018509642	0	0.124348914	0.576877308	0	0.138030335	0.329901575	0	0.021490067	0.237203391	0.356179224	0.143129608	0.053920159	0.080534104	0.141236901	0.059336464	0	0	0.149566107	0.019725509	0	0.73856951	0	0	0.068679327	0.162692815	0.043560499	0.085149935	0.425001809	0	0	0.256029056	0.310389689	0.972885902	0	0	0.031018905
TCGA-AA-3685	3.08767123287671	0	0.1876681	0	7.02555	0.1001473	0.2366262	4.722124	0	0.2326513	0.2019001	0	0.1849802	0.3685907	0.1830776	0.3833967	0.117149	1.034577	0.382681	0.2783098	0.1687445	0.7337399	0.036322	0.3648973	0.05773532	0.3305574	0.3240648	0.09076409	0.2427666	0.6436687	0.1989727	0.08096461	0.2106233	2.421909	0.162497	0.2447323	0.1470776	0.5806809	0.1554755	0.09117479	0.8595826	0.05012345	0.05153357	0.7538976	1.270756	0.9983181	0.03912549	0.05515409	0.07380816
TCGA-AA-3712	0	0	0.1475494	0	2.90317	0.2194173	0.05891311	1.971259	0.05910667	0.1511048	0.1809623	0.02938025	0.0921095	0.081572	0.1104995	0.2969704	0.1333336	0.4906287	0.5130277	0.2217316	0.4888731	0.2529418	0.01808627	0.3924674	0.01916591	0.1622131	0.1434361	0.07833852	0	0.0836113	0.2416512	0.03856287	0.1281846	0.4594178	0.04623667	0.3655879	0.1220603	0.05782914	0.02322536	0.03026654	0.3399004	0.09983439	0.102643	0.2047624	0.493231	0.7156391	0.03896449	0	0.09188055
TCGA-AA-3837	3.24931506849315	0	0.08766429	0	2.74255288	0.44442134	0.16154937	1.38860231	0	0.71821344	0	0	0.11726895	0.36348607	0.19695501	0	0	0.87449949	0.26126391	0	0.06807581	0.25046939	0.08059268	0.64771875	0.34161442	0.29763339	0.19174605	0	0	0.37257322	0.43072049	0	0	1.07232849	0	0	0	0	0.06899504	0	1.34631227	0	0	0	0.52054215	0.21402004	0	0	0
TCGA-AZ-4616	0.427397260273973	1	0.1026999	0.0481627	6.953281	0.4373422	0.3217373	3.354589	0.3394087	0.1577619	0.2729059	0.03067463	0.2678952	0.2129144	0.1672832	0.2805248	0.1914107	0.8195902	0.8723113	0.1157501	0.2631806	0.7042277	0.2077139	0.5084034	0.3001544	0.2689828	0.1123165	0.066061	0.08413966	0.1745898	0.1513784	0.01098049	0.4258288	0.6052827	0.4344631	0.2968733	0.229388	0	0.06466288	0.03159996	0.8674725	0.05211635	0.1607476	0.07126114	0.6572526	0.3961492	0.36613	0.2485037	0.1611598
TCGA-D5-6928	0.96986301369863	0	0.165781631	0.63168518	4.409690651	0.063033274	0.210034993	2.434503252	2.583776305	1.421877092	0.296513238	1.76400879	0.471254669	4.210246911	0.325903317	2.54718394	0.245780907	3.359206033	1.791022881	1.926867991	0.458628856	2.249893564	1.428829966	0.857429081	0.585460918	0.477420353	1.125602765	0.472888369	1.018658215	3.14121653	0.432721201	1.80574253	0.490990893	3.024532006	0.073054693	1.583147459	0.540000386	0.670053999	0.848095844	1.179600067	1.829942157	1.261919878	0.43247382	0.119825159	9.21503523	0.172011338	0.574602352	3.317145227	0.06194039
TCGA-AA-A02J	0.419178082191781	1	0.07880399	0	1.000099	0.1797765	1.071008	0.7565183	0	0	0	0	0	0.1633741	0.1549175	0.3398734	0.03338043	0.3930566	0.08807166	0.1110222	0.0458965	0	0.1086707	0.262014	0.0383859	0.04777703	0.08618306	0.01810362	0	0	0.05807808	0.02106396	0	0.8105921	0.09260377	0.3254254	0.04889299	0	0	0	0.3781998	0	0	0.2278347	0.09098649	0.432875	0	0	0.05152569
TCGA-D5-6538	1.42739726027397	0	0.1105244	0.04712013	0.587161	0	0.439756	0.5859804	0.1509371	0.06173873	0.061615	0.03001063	0.03360206	0.08332218	0.1410879	0.2238953	0.0510729	0.5011554	0.1796692	0	0.1950634	0.08612293	0.03694864	0.1484771	0.8613938	0.1364534	0.04395409	0.01231066	0	0.01423421	0.1431648	0.03580932	0.07141901	0.5977668	0	0.2074621	0.04987167	0.1181398	0.02372368	0.03091592	0.1414491	0.0509882	0	0.627467	0.1325825	0.5740017	0.079601	0.01870188	0.05631115
TCGA-NH-A6GB	1.3041095890411	0	0.01406628	0.131932	1.162422	0.1996685	0.0064804	2.022168	0.6339148	0.2736993	0.02875272	0	0.06585786	0	0.3950332	0.2831099	0.0714997	0.7717539	0.1886464	0.07926854	0.3932347	0	0.09052117	0.6651552	0.2740708	0.1637387	0.3179241	0.03877731	0	0.259054	0.1658683	0.1052759	0.2499583	0.8603089	0.066118	0.2323499	0	0	0.07749478	0.3462469	0.2700302	0.1427622	0	0.06506851	0.6960352	1.195061	0.05571886	0.05236352	0.09985513
TCGA-A6-2682	1.16164383561644	1	0.08905514	0	4.520785	0.2708834	0.06154217	3.376971	0.4013383	0.2280026	0.4550914	0	0.1786942	0	0.3751497	0.2560571	0.3017815	1.998841	1.725159	0	0.3112014	0.5088865	0.04093566	0.7566945	0.2602758	0.1727746	0.1298588	0.1500298	0	0.1261614	0.3937987	0.03173873	0.369253	1.485466	0	0	0.4420255	0.2617759	0.1401794	0.4110237	2.906304	0	0	1.132878	1.263247	0.891404	0.3527621	0.2486393	0
TCGA-AA-A02Y	3.33150684931507	0	0.044272356	0	0.517433158	0	0.318185061	0.894655765	0.026602535	0.054406991	0	0	0.029611674	0.036713661	0.114386505	0.11456525	0	0.397476993	0.131943909	0.049898125	0.0137519	0.075895467	0	0.399076563	0.103513588	0.017178432	0.083924437	0.005424361	0	0.100350673	0.004350463	0.015778408	0.04195847	1.147099271	0.208100474	0.365650226	0	0	0.013937593	0.027244527	2.538355794	0.044933137	0	0.163837834	0.350513347	0.860354502	0	0.14832855	0.079398335
TCGA-AA-3850	0	1	0.1212628	0	3.561041	0.06147516	0.1396658	2.350072	0.273243	0.1552309	0	0	0.0811069	0.2513984	0.3235232	0.915239	0.05136546	1.512078	1.400412	0.5125194	0.3060419	0.5196976	0.1114809	0.9631628	0.2362713	0.1911489	0.9725291	0.08357299	0	0.6871557	0.1489499	0.3133257	0.3950546	1.011349	0.07124886	0.1251903	0.150472	0.1782248	1.264557	0.2798371	0.892354	0.3076816	0.1581688	0.2804717	2.460159	0.3848598	0	0.2821351	0.3284755
TCGA-CK-6747	0.243835616438356	0	0.05799453	0	1.824124	0.3528097	0.1679439	1.159228	0.3982625	0.1357531	0	0	0.1274522	0.06870432	0.2233647	0.2143924	0.05615038	0.8264677	0.5555565	0.1400657	0.08363777	0.2603836	0.007616613	0.3244357	0.06457025	0.1205511	0.1449715	0.04821682	0	0.05868494	0.2157435	0.05610133	0.09814903	0.2441447	0.1752435	0.410557	0.0411223	0.09741362	0.03260275	0	0.3180915	0.08408589	0.08645148	0.5940353	0.4591546	0.3600317	0	0.2621546	0.09905503
TCGA-A6-6782	0.517808219178082	0	0.1462051	0.1285597	2.481172	1.232243	0.1599737	2.526424	0.4941689	0.3181723	0.07471403	0.2183444	0.16502	0.3788852	0.2514913	0.5714518	0.1083788	1.504054	1.879093	0.1029898	0.1206317	0.6527014	0.1848154	1.053249	0.5697391	0.2703543	0.5529719	0.1091599	0.07486406	0.3754121	0.574679	0.3452065	0.2814576	1.072031	0.1718078	0.7547025	0.7030118	0.3223254	0.1294524	0.1405818	1.122679	0.3245972	0	0.1902158	1.790563	0.6112584	0.5429461	0.4252087	0.04438369
TCGA-CM-5860	0.832876712328767	0	0.06761504	0	3.153021	0.05484481	0.08099146	2.521771	0.2437727	0.2769773	1.022762	0	0.262302	0.6167811	0.3417985	0.1166467	0.1145637	1.281545	1.108314	0.152414	0.1785222	0.3863717	0.0497286	0.6894237	0.1317428	0.511598	0.2859261	0.09527021	0	0.4214671	0.4252322	0.04819521	0.3844869	0.4210598	0.03178219	0.614284	0.671215	0.3975063	0.04257244	0	1.003791	0	0	0.1876662	0.6602307	0.4423947	0.2678344	0.05034113	0.05557808
TCGA-AA-A00R	0.0821917808219178	0	0.02556231	0.2397568	3.349728	0	0.1177667	2.509196	0.07679987	0.7591698	0.1045032	0	0.1367793	1.059901	0.1435768	0.9738537	0	1.27499	0.6094622	0.2881056	1.012373	2.044985	0.1880022	0.3399667	0	0.0743896	0.335471	0.1174484	0	1.557171	0.02511903	0.1730949	0.3331116	0.6964318	0	0.105561	0.1268786	0	0.4627251	0.7865326	1.046868	0	0.5334743	0.1773711	3.018866	0.3369966	0.202513	0.5233743	0.03820301
TCGA-A6-6653	0.772602739726027	0	0.114296184	0	2.138687964	0.34766036	0.084250845	1.017693219	0.446411604	0.105345278	0.023363148	0.034138245	0.122315654	0.094782201	0.096295794	0.213610627	0.154926388	0.741108751	0.562046683	0.064410004	0.133135258	0.293904472	0.052538129	0.202678057	0.178157948	0.072066923	0.224997634	0.024506749	0	0.080959797	0.061772793	0.016293796	0.013540314	0.114389639	0.026862237	0.37759387	0.141827381	0	0.026986599	0.035168057	0.658242764	0.174003145	0.178898374	0.105743408	0.316717239	0.474364726	0.135823814	0.085096429	0.021352034
TCGA-AD-6890	2.04383561643836	0	0.0706426	0	3.586093087	0.200551953	0.032545371	1.54283438	0.212239917	0.202565527	0.057759881	0	0.066149267	0.292908341	0.246004296	0.660127465	0.14363213	0.916108434	0.589496757	0.238857851	0.351088612	0.322937599	0.038966445	0.678537395	0.440453574	0.185021132	0.226621864	0.125501988	0	0.160123226	0.312379126	0.065459181	0.167376195	1.24903972	0.265642219	0.233377982	0.455825243	0.08306104	0.022239337	0.130417107	0.777511776	0.071696967	0.073714017	0.359460304	0.671150392	0.676058811	0.223861598	0.05259522	0.063345452
TCGA-D5-6539	1.04109589041096	0	0.157998	0	1.352309	0.09154102	0.09878699	1.327183	0.1695329	0.3004954	0	0.134832	0.1207741	0.09358767	0.2915854	0.6246433	0.07648693	1.238378	0.5045121	0	0.05258295	0.3869339	0.103752	0.2751701	0.1099454	0.1970548	0.1645645	0.09333473	0.2773803	0.447661	0.4990441	0.1970835	0.05347867	0.3890431	0	0.4194395	0.02800799	0.1990424	0.07105731	0.208349	0.4621845	0.2290803	0.05888125	0.1044107	0.744585	0.4243029	0.04470401	0.06301798	0.07589857
TCGA-AD-A5EK	1.36986301369863	0	0.08814491	0.04133692	3.459994	0.008937158	0.3329919	3.492654	0.1059297	0.06318822	0.05405279	0.07898197	0.07074713	0.03654789	0.2079366	0.5068798	0.07467426	0.439647	0.3152355	0	0.1026736	0.1511056	0.1458621	0.3256349	0.3091386	0.2394121	0.1799441	0.08639789	0	0.1873079	0.2208718	0.09110155	0.3445944	2.225028	0.1035804	0.5095989	0.1312523	0.1554602	0.01387466	0.08136453	0.2933002	0.04473025	0.5978524	0.6523922	0.2268049	0.5250719	0	0.01640653	0.04939989
TCGA-A6-3808	0.764383561643836	0	0.32354573	0.12644316	4.2493463	0.10934945	0.29811802	1.98009989	0.16201112	0.82835504	0.055113	0.08053115	0.23443806	0.22358851	0.36345446	0.34885481	0.1370501	2.01721667	1.24549745	0	0.25124983	0.30813879	0.17351033	0.95622354	0.26266846	0.51001146	0.23589467	0.1321388	0	0.45835645	0.52989186	0.1153098	0.03194122	0.97442909	0.1267345	0.33402495	0.80296021	0.95105662	0.10610103	0.16592089	1.31123302	0	0	0.62361422	1.47646517	0.25013229	0	0.20074005	0.04029507
TCGA-AA-3506	4.83561643835616	0	0.235572047	0	1.501771802	0	0.086823302	1.741348575	0.283102785	0.048249696	0.096306007	0.140722394	0.126050355	0	0.158777635	0.270932756	0.079828401	0.469992153	0.280828036	0.265506617	0	0.673062993	0.043313833	0.626599463	0.183597699	0.06855449	0.103052247	0	0	0.066745413	0.486122664	0.050373897	0.390704859	1.152627254	0.110729718	0.389123058	0.233852543	0	0.111242356	0.144967414	1.386830673	0	0.24581431	0	1.056874334	0.92018569	0	0	0.08801593
TCGA-G4-6298	0	1	0.109509	0	2.750821	0.1357069	0.2634678	3.331993	0.1096702	0.4112084	0.5471791	0.07268531	0.8626673	0.05045129	0.1640222	0.2274041	0.04123261	0.1820687	0.5802082	0.1371383	0.1606298	0.2085885	0.07830294	0.5304237	0.4504476	0.2360631	0.1419416	0.07454064	0.09968688	0.05171257	0.2092416	0.008672967	0.1297319	0.4397471	0	0.2009881	0.241577	0.07153323	0.03830561	0.1123169	1.136768	0.1234927	0	0.1407145	0.2568904	0.415879	0.1927925	0.02264784	0.1091078
TCGA-AZ-6608	0.161643835616438	1	0.08353633	0	1.643655	0.1882197	0.2223611	1.209606	0.8365935	0.0665383	0.09486423	0	0.02483266	0	0.3128012	0.3335959	0	0.6481384	0.1106495	0.05230635	0.01441561	0	0.02559923	0.2263136	0.4521227	0.04952066	0.06090568	0.01421539	0	0.1051939	0.07752729	0.01323194	0.3078846	0.9031364	0.1527008	0.4216273	0	0.05456744	0.007305131	0.05711886	0.2375772	0	0.338988	0.1073407	0.1530959	0.8429611	0.0367668	0.05182911	0.03121137
TCGA-AA-3678	3.91780821917808	0	0.1070669	0	1.421983	0.01809282	0.2630732	1.700223	0.1072246	0.2558426	0	0.05329832	0.107418	0.2959573	0.3006835	0.3848071	0.03023484	1.424069	0.4520429	0.1005601	0.02771432	0.05098425	0.1148352	0.6064928	0.1043059	0.1471343	0.2471952	0.08198818	0.1461958	0.328636	0.5786565	0.1780708	0.2959573	0.4861638	0.04193866	0.2947591	0	0.1049071	0.1263984	0.05490611	3.699652	0	0.09310167	0.1238189	0.8712172	0.3572314	0	0.09964257	0.1000076
TCGA-A6-5665	1.10684931506849	0	0.13654882	0.05154725	4.9394545	0.027646865	0.16768955	5.6040375	1.91275395	2.7878765	2.1274575	0.25758015	0.166399785	1.0096344	0.4407024	0.42876895	0.33807955	0.67790495	1.1509061	0.06194215	1.2609306	0.54413735	0.441688945	0.5269311	1.4089009	0.28787357	0.13068585	0.134215135	0	0.3311874	0.246857885	0.37160936	0.5506398	0.4913727	0.038749515	0.4469096	0.14792968	0.06337435	0.1412388	0.0845515	0.65410765	0.2745937	0.1433699	0.07577895	1.23976575	11.4754712	0	0.1719299	0.19569664
TCGA-G4-6306	3.72328767123288	0	0.04879342	0	0.7008407	0	0.1198899	0.7924052	0.1954611	0.09993833	0	0	0.0326356	0.1348761	0.2557893	0.3974996	0	0.4056177	0.04847265	0.1833123	0.1389322	0.1858797	0.02990494	0.06008607	0.1267604	0.03155447	0.0474332	0.009963822	0	0.1612894	0.4155432	0.1681003	0.1156081	0.9314503	0.03822526	0.2686601	0	0	0.1152067	0.1000891	0.1248916	0	0.08485812	0.07523702	0.5579998	0.833856	0	0.06054658	0.2066124
TCGA-F4-6806	1.31780821917808	0	0.174388802	0.148695154	1.862239006	0.096444918	0.438227588	1.312672073	0.333414392	0.292239723	0.518496128	0.047351678	0.021207342	0.328670691	0.267135429	0.546996972	0	0.395369144	0.49610308	0.446701602	0.061555379	0.271774756	0.072873357	0.445116062	0.401562128	0.123028801	0.10402815	0.058272425	0	0.718693244	0.2882043	0.079101458	0.093905912	1.427984124	0.037259442	0.130936016	0.236067124	0.186404588	0.137250446	0.048780084	0.97388796	0	0.165428113	0.293344181	1.056423284	0.348337439	0	0.236067124	0.08884944
TCGA-AA-A01T	2.75342465753425	0	0.1427967	0.1339335	1.989238	0	0.06578712	1.055554	0.3432169	0.05849505	0.1167557	0	0.01910199	0	0.1924925	0.7390411	0.09677919	0.2848952	0	0	0.04435559	0.2447944	0	0.4642316	0.2225829	0	0.2915136	0.05248745	0	0.08091815	0.1403205	0.03053515	0.03383337	0.7304468	0.06712105	0.2358748	0	0	0	0.08787492	0.5117033	0	0.1490053	0.06605564	0.2072677	0.613568	0	0	0.03201158
TCGA-A6-6651	0.70958904109589	0	0.2397237	0.3459142	2.949805	0.05609072	0.1571672	2.226111	0.2216093	0.5759811	0.1130807	0.1652336	0.2898449	1.987952	0.4919778	0.7820551	0.2030881	1.471616	2.679161	0.3117528	0.4653942	1.106417	0.1695276	1.560044	0.3054006	1.028552	0.6991226	0.2880671	0	0.8490213	1.372628	0.4008925	0.469681	0.8663766	0.06500836	0.533051	0.7551093	0.7588681	0.4934483	0.6241326	1.887989	0.7018316	0	1.919295	2.852995	0.3241394	0.073045	0.4118778	0.07234264
TCGA-AA-3812	2.92054794520548	0	0	0	1.225593	0	0.08696001	0.8969608	0.3402583	0.1159816	0.07716612	0	0.0757493	0	0.3180553	0.1356797	0.2558531	0.1882929	0.5062864	0.2127397	0.08794647	0.1078596	0.1735281	0.585747	0	0.1647898	0.1926671	0.05781666	0	0.1069608	0.8161172	0.04036257	0.1788892	0.293858	0	0.6235772	0	0	0	0.1161565	1.159525	0	0.1969611	0.1746299	1.270246	0.2027596	0.2990749	0	0.07052362
TCGA-F4-6809	1.1041095890411	1	0.233792489	0.438562462	2.461964795	0.369791857	0.249885522	2.262363158	0.533831922	0.430966877	0.057347096	0.111727479	0.206411939	1.667339605	0.367682461	0.799936077	0.158450723	1.679190259	2.773130719	0.158100556	0.341317455	0.774855107	0.232127811	1.3335571	0.692400907	0.376469275	0.259093549	0.117443867	0.153232668	0.967121596	0.992469387	0.756566218	0.520697418	1.939464495	0.131871892	0.386183545	0.557006339	0.714717788	0.448968169	0.402842443	1.340449383	0.237281929	0.048791476	0.410965845	1.789283784	0.529675966	0.666785258	0.313316066	0.038434458
TCGA-AD-5900	1.01369863013699	0	0.1200745	0.1689324	2.622461	0.02434911	0.1714885	1.371731	0.3246787	0.1598582	0.4172529	0.07172826	0.07228092	0.7965919	0.1011641	0.2589345	0.06103456	0.4192333	1.377743	0.2706652	0.1585148	0.4459911	0.1655827	0.4258492	0.1871649	0.1455968	0.113809	0.09194896	0.1967486	0.4082534	0.2536835	0.1369403	0.1564734	0.7210362	0.08466084	0.1983417	0.08939855	0.1411827	0.2362577	0.4433521	0.4149125	0.06093334	0.2505903	0.05554468	1.117019	0.3517741	0	0.3352446	0.04934931
TCGA-D5-6930	1.11232876712329	0	0.184641812	0.494803675	4.538653282	0	0.583305145	2.377131449	0.237746243	0.378182026	0.161753205	0.039392313	0.1764259	0.382794001	0.14815501	0.369729754	0.067038912	0.723605007	0.78611979	0.445938395	0.235559134	0.866686059	0.109123276	0.526210536	0.205577458	0.211094471	0.298089151	0.19794933	0.216104015	0.541835795	0.34343987	0.122209765	0.312484899	0.850633464	0.15498243	0.163390384	0.39277299	0.232607635	0.34253987	0.527548036	1.130885595	0.066927736	0.275242453	0.366053739	2.392904657	0.341302619	0.156727863	0.049096624	0.147829395
TCGA-AA-A03J	3.41369863013699	0	0.09361543	0.109756	2.307068	0.07118867	0.2156453	1.752481	0	0.07190342	0.0956791	0	0.1408836	0.09704039	0.1445987	0.4710459	0	0.5836659	0.5579999	0	0.05452288	0.1337363	0.2151594	0.3458448	0.1368019	0.0794596	0.1365086	0.0430125	0.1917425	0.1657773	0.7934314	0.100092	0.5267907	0.8198048	0.05500446	0.09664751	0.1161651	0	0.05525911	0.2880475	0.9884239	0	0.3663213	0.1623941	0.802937	0.3428234	0	0.1306858	0.0262329
TCGA-AA-3815	2.75342465753425	0	0.10239534	0	1.58659452	0.10382033	0.28304404	1.35161854	0	0.57674486	0.05232628	0	0.1540966	0.31842455	0.21567301	0.90164188	0	1.7875373	0.99179128	0.14425863	0.23854568	0.80453485	0.02353386	0.20805429	0.04987739	0.17382376	0.3172865	0.08625193	0	0.29012014	0.1006197	0.1094793	0.09097844	0.55509496	0.06016316	0.31713538	0	0	0.54397527	0.07876565	0.68798879	0.51961816	0.13355914	0.11841638	1.89159833	0.21248627	0	0.1429424	0
TCGA-CM-6169	0.665753424657534	0	0.1742782	0.1167578	1.719442	0.05048674	0.2294022	2.12719	0.1496013	0.5099363	0.2544572	0	0.4163087	0.7226171	0.2796787	0.5547848	0.2109205	1.490161	1.817891	0.2806058	0.1546697	0.2845359	0	0.6438385	0.2425485	0.5554741	0.5808681	0.0915129	0.2039745	0.8112237	0.3669773	0.3105587	0.1474729	0.498345	0	0.3084392	0.617879	0.1463679	0.1175687	0.2298175	0.6372604	0.2526849	0	0.2303386	1.823303	0.4619452	0	0.2317046	0.05581281
TCGA-A6-6650	0.761643835616438	0	0.06925444	0	1.41517526666667	0.06979241	0.14548481	1.6084795	0.8362274	0.29322501	0.0390238666666667	0.0589281366666667	0.163276616666667	0.0145162966666667	0.669591466666667	0.1763791	0.16233279	1.09644223333333	0.302512763333333	0.0362405	0.66540869	0.12658145	0.0819049666666667	0.351995633333333	0.4606212	0.317210733333333	0.190316233333333	0.123229966666667	0.0784797866666667	0.308364	0.188265346666667	0.505034303333333	0.194788433333333	0.744509166666667	0.15421982	0.299892396666667	0.103447253333333	0.19663834	0.128886793333333	0.0708062766666667	0.126398846666667	0.227843753333333	0.751037	0.0295929666666667	0.668500333333333	5.38165933333333	0.01273695	0.0243462466666667	0.21372534
TCGA-F4-6855	2.95068493150685	0	0.1175917	0.06893305	3.123529	0.02980704	0.5417503	2.233066	0.6182655	0.2709567	0.6009194	0.08780638	0.157303	0.4266283	0.1073283	0.3592388	0.2241469	2.346083	2.037025	0.08283392	0.1369739	0.2099851	0.05405296	1.042609	0.4868767	0.6844138	0.09645207	0.1260668	0	0.1665882	0.2527711	0.04190898	0.2786144	0.5966119	0.03454594	1.031903	1.057896	0.08641463	0.03470588	0	2.031666	0.1491835	0	0.03399759	1.086164	0.2368439	0.407575	0.05471876	0.03295151
TCGA-CM-4748	0.586301369863014	0	0.3357606	0	1.9819204	0	0	1.7728161	0	0.3438512	0.6863243	0	0.8982973	0	0.377176	2.1721512	0.5688967	0	1.0006599	0	0.2607353	0	0.3086758	0.9923241	0.6542041	0	0.2448005	0.7199192	0	0.4756609	1.4847218	0.1196631	0.3977652	0.933431	0.7891148	1.3865419	0.8332745	0	0.7927682	0	3.0079434	0	0	0	0.4430477	0.6557699	0	0	0
TCGA-AA-3517	3.24931506849315	0	0.1002416	0.1175246	2.204097	0	0.02309088	1.666015	0.2258757	0.2566426	0	0.07485096	0.117332	0.2078179	0.2111366	0.6484973	0.08492227	1.624943	0.4107781	0.423673	0.1946068	0.3580057	0.4146993	0.2036781	0.4882828	0.2430966	0.2740701	0.2763417	0	0.3905245	0.3817002	0.0803824	0.2671945	1.490919	0.1177954	0.3104648	0.2487747	0.4419874	0.05917038	0.2313267	0.5131564	0	0.1307499	0.05796282	0.661361	1.064557	0.09926836	0.04664526	0.1591748
TCGA-D5-5541	0.958904109589041	0	0.1361888	0.07983484	2.431775	0.3193195	0.2980284	1.954991	0.3580222	0.2004888	0.05219662	0.02542325	0.1309422	1.199957	0.1434257	0.3915789	0.1009539	1.485923	1.17959	0.1439012	0.1850758	0.3647915	0.09390217	0.5282805	0.0663384	0.1981635	0.2172061	0.04692994	0	0.2894013	0.2049229	0.1031409	0.242008	0.9607271	0.3000705	0.8435989	0.3379869	0.2001623	0.03349552	0.2095213	0.5882435	0.3023596	0.0444094	0.07874865	1.106314	0.5818504	0.1348666	0.1425882	0.0190814
TCGA-A6-2686	1.33698630136986	0	0.04079884	0.2391656	3.293302	0.8893822	0.2443508	2.036678	0.3370861	0.5640562	0.5212276	0.06092945	0.2592398	1.903117	0.2979034	0.5718738	0.1209733	0.9666033	1.337511	0.4023532	0.8158215	0.6702666	0.2156694	0.3315922	0.1192402	0.6332259	0.5354301	0.09997553	0.08356389	0.982572	0.2455595	0.3271605	0.5437476	0.6294964	0.071915	0.3790823	0.5568893	0.05996371	0.2568816	0.5335233	0.6396255	0.1552792	0.7982381	0.1179558	2.691773	0.4930429	0.2020137	0.7024399	0.4839818
TCGA-NH-A50U	0.915068493150685	1	0.3799902	0.03494163	1.750418	0	0.1201414	1.992043	0.2686234	0.08393357	0.1370706	0.02225418	0.1644548	0.2471481	0.1841362	0.8729866	0.01262426	1.56084	0.6772652	0.2519272	0.144648	0.2128797	0.0616478	0.253235	0.5371399	0.09757237	0.1358078	0.04108002	0	0.01055528	0.6113522	0.01858792	0.06178702	0.9403954	0.1575996	0.7692109	0.2773651	0.1314087	0.08209664	0.045851	0.5435242	0.1890498	0	0	0.2408735	0.698498	0.0590276	0.01386825	0.04732478
TCGA-AA-3543	0.0821917808219178	0	0.166003911	0.111214443	2.883659204	0.048089744	0.131106457	1.252143784	0.356246558	0.267149151	0.387801864	0	0.095170392	0.688308898	0.253080223	0.477305113	0.040181298	1.655980332	0.600752961	0	0	0.880837077	0.174414719	0.280352235	0.323446015	0.138026484	0.190193391	0.094432083	0	0.335960296	0.372857669	0.050710988	0.196659685	0.764769798	0.055735349	0.881385715	0.117708717	0.139418682	0.093322304	0.510781264	0.69805552	0.361031959	1.113566606	0.109701321	2.127893412	0.312640888	0	0.617970763	0.017720983
TCGA-AA-3518	0.0849315068493151	0	0.09532663	0	2.138229	0.02416331	0.8454103	0.8007437	0.4296016	0.2196532	0	0.2135428	0.111579	0.2964426	0.3346406	0.4796562	0.1211377	0.9509356	0.6037121	0.2685999	0.6662341	0.5447236	0.2190923	0.2112999	0.04643418	0.4161191	0.2085057	0.06569809	0	0.2363306	0.2107655	0.1189085	0.1411631	1.152805	0.2240396	0.1968283	0.1774328	0.1401054	0.07502559	0.4399691	0.4574961	0.2418735	0.2486782	0.2204834	0.7704439	0.3141809	0.09440113	0.1330746	0.03561654
TCGA-AA-3984	0	0	0.34671	0.1016219	2.059343	0.1098547	0.04991591	1.424978	0	0.332873	0.04429412	0	0.04348085	0.1796973	0.3651338	0.264797	0.03671556	0.9727378	0.678098	0.1221147	0.3365476	0.6810376	0.01992137	0.3202139	0.1688845	0.1156112	0.2211856	0.07301213	0	0.4604743	0.09582123	0.1699024	0.07701312	0.7951935	0	0.08948488	0.161334	0	0.0341092	0.13335	0.5823815	0.109964	0	0.05011965	0.943585	0.3491581	0.08583598	0	0.2671763
TCGA-CM-4752	0.336986301369863	0	0.07302434	0	3.419635	0.5923247	0.2242843	2.044681	0.1462638	0.2991358	0.1990243	0	0.08140418	0.7064956	0.2050794	0.2449583	0.1237289	0.8498676	0.4352656	0.2743456	0.07560952	0.8345639	0.1118895	0.5755196	0.2371373	0.1416735	0.2839545	0.06710345	0	0.4138046	0.05979835	0.06072604	0.3748752	0.6361019	0	0.2010387	0.2416377	0.2862049	0.2107338	0.3744838	0.747652	0.2470475	0	0	1.509611	0.2971311	0.09642049	0.09061414	0.08185146
TCGA-AA-3663	0.580821917808219	0	0.062941335	0	2.102852513	0.025526903	0.521952533	1.169198236	0.226922515	0.064457993	0	0	0.07577724	0.417562026	0.190903564	0.425286482	0.149302701	0.753449328	0.412681827	0.070939405	0.195508676	0.215798862	0.092582477	0.102311014	0.122636412	0.146533892	0.064246052	0.026991059	0.10313279	0.19616716	0.247399466	0.013459153	0.104390507	0.083990399	0	0.467855428	0.062481909	0.07400595	0.019814865	0.154932516	0.273877728	0.191642273	0	0.116462878	0.323907671	0.405668804	0.099728406	0.046861432	0.06584632
TCGA-AA-3549	1.75068493150685	0	0.2403861	0	1.986524	0	0.3523768	1.757004	0	0.179039	0.04467004	0	0.07308312	0.09061118	0.1963908	0.2827529	0.1481086	0.3269978	0.683853	0.2463022	0.2036423	0.3121898	0.04018089	0.2583452	0.1703179	0.08479449	0.1593306	0.04016279	0	0.09287646	0.04294865	0.03894191	0.1812224	0.6804359	0.3081615	0.270733	0.1627033	0	0.3955849	0.06724088	0.7551311	0	0	0.05054501	0.6199774	1.429826	0	0	0.1551343
TCGA-AA-3561	1.16164383561644	0	0.1768865	0	4.059024	0.3811148	0.2139176	1.99528	0.06643014	0.113218	0	0	0.08873324	0	0.07451442	0.3973402	0.03746351	1.543973	0.5601191	0	0.05151054	0.1895213	0.0203272	0.2123791	0.08616249	0.3002781	0.08060411	0.08127218	0	0.03132365	0.07604587	0.01576033	0.104776	0.504047	0.05196551	0.1826156	0.1646207	0	0	0	1.075301	0	0	0.153422	0.5105796	1.414288	0	0.1646207	0.0495671
TCGA-G4-6626	0.00273972602739726	1	0.1379244	0	1.891302	0	0.1368605	1.685648	0.2868802	0.1412478	0.06506066	0.1584445	1.20636	0	0.4111791	0.4499532	0	0.6350175	0.2371459	0.1793661	0.7332595	0.06062609	0.1658133	0.1411022	0.2067193	0.2778768	0.1237656	0.09099375	0.1738435	0.1653324	0.03648955	0.01890593	0.08798176	0.2005668	0.02493492	0.4819406	0	0	0.0417506	0.03264482	0.353031	0	0	0.02453913	0.2799937	0.528396	0.04202624	0.01974773	0.06738823
TCGA-AA-3821	0.0849315068493151	0	0.1838546	0	2.697628	0.5326091	0.5082159	1.746093	0.8680194	0.3765696	0.05368785	0.3137949	0.01756737	0.1089034	0.1917803	0.4342322	0.2670123	1.572043	0.587076	0	0.7342585	0.07504268	0.3380471	0.1552495	1.330556	0.7388653	0.07659824	0.136767	0	0.1860433	0.4774753	0.05616402	0.124461	0.9638351	0.06172865	0.1084625	0.5866475	0.1544106	0.02067148	0.1616304	0.5714354	0.1332848	0.2740689	0	0.4852048	0.3975574	0	0.04888729	0.09813273
TCGA-CK-4952	1.3013698630137	0	0.04891232	0	1.258813	0	3.344065	0.9860723	0.2939061	0.1703092	0	0.05843697	0.04580117	0.2433686	0.2197822	0.372685	0.08287469	0.2439636	0.4664713	0.1653831	0.5773404	0.1956493	0.03597337	0.2891159	0.2668454	0.128107	0.09272013	0.005992861	0	0.04157547	0.1105475	0.003486413	0.05794491	0.6037452	0	0.363575	0.02427765	0.05751074	0.03849581	0.06019978	0.1377155	0.3971388	0.05103894	0.3620177	0.3356157	0.3868967	0.07749991	0.07283294	0.0548248
TCGA-A6-2681	1.51232876712329	0	0.115733953	0	1.833124019	0.07822971	0.248822772	1.398066157	0.405665404	0.256799234	0.275998807	0.115225605	0.116113409	0.239936245	0.151677758	0.124787138	0.065364691	0.962091544	0.776068439	0	0.04493667	0.330668438	0	0.570076699	0.187915684	0.355511811	0.07031727	0.05317506	0	0.081978217	0.246408514	0.027497934	0.045702142	0.450444496	0	0.159309895	0.143611475	0.113399263	0.045543454	0.178052236	1.184929812	0.097884438	0.10063822	0.223069978	1.361708029	0.452077099	0	0.107708606	0
TCGA-AY-6197	1.15890410958904	0	0.06741543	0.04516502	0.6423861	0.1074128	0.1286713	1.248149	0.2893488	0.09862843	0	0.05753084	0.05797411	0.07986497	0.2055555	0.2907558	0.03263585	0.9126867	0.1865655	0.1628186	0.2767153	0.275165	0.08853891	0.3059803	0.03752967	0.1448051	0.09830413	0.03834958	0	0.1773668	0.09463768	0.09610586	0.07986497	0.3801912	0.06790363	0.1988541	0.04780239	0	0.05305844	0.05926631	0.2465092	0.04887259	0.3517327	0	0.4638471	1.11918	0.07629819	0.1254813	0.2338903
TCGA-AY-6386	0.986301369863014	0	0.074299466	0	1.152821084	0	0.044010137	1.622700344	0.861017169	0.076089815	0.02169638	0.031702763	0.02839736	0.088020274	0.333856633	0.122074629	0.053952626	0.582354182	0.36378284	0	0.098909725	0.333589441	0.009757993	0.61955306	0.041361962	0.123554849	0.208945911	0.026009594	0	0.195478358	0.057365814	0.068091155	0.037722974	0.814421436	0.224512541	0.788975246	0.026341834	0.12480108	0.066830208	0.16329553	0.29884926	0.107726305	0	0.98199489	0.511212184	0.502714162	0.336357085	0.039512751	0.146732698
TCGA-AU-3779	1.20821917808219	0	0.82578	0	2.499869	0	0.0978276	1.90826	0.2126562	0.3745147	0.09645526	0.2466459	0.03156143	0.4402242	0.2517875	0.9327747	0.09994015	2.177083	1.107474	0.3323976	0.1648955	0.2022318	0.1409881	0.7321657	0.1838822	0.7266595	0.1806209	0.07949594	0.1932979	0.5347909	0.3187879	0.2060122	0.1956552	1.200328	0.249528	0.5845892	0.08783062	0.06935328	0.2506832	0.2177881	0.4831235	0.1197293	0.1846465	0.8185574	1.167477	0.5068865	0	0.02195765	0.2512342
TCGA-CM-4744	0.586301369863014	0	0.0391603	0.03672966	4.086812	0.1032337	0.0108248	1.319545	0.02353078	0.1363533	0.1440848	0	0.04190794	0.4221671	0.09677941	0.3152694	0.02654053	0.351581	0.2100754	0.2206823	0.2493618	0.3356597	0.007200271	0.2141122	0.04578052	0.04178588	0.06281323	0.01679306	0	0.3550534	0.01154437	0.0474521	0.1298976	0.1567693	0.2761072	0.2587433	0.01943723	0	0.06780533	0.1927892	0.2606101	0.03974478	0.1225888	0.09057484	0.8371084	0.5430328	0.1861445	0.3790259	0.4126032
TCGA-AD-A5EJ	0	0	0.178642085	0.049280575	2.01592631	0.010654598	0.382458665	2.108396941	1.483860621	0.118377285	0.515520246	0.031386604	0.021085623	0.087142481	0.123947702	0.294589485	0.089024295	0.36689328	0.391472795	0.059218371	0.481456401	0.300238799	0.028982042	0.341626299	0.204747376	0.107032348	0.107261867	0.032187763	0	0.133981564	0.077445991	0.033706054	0.099591406	0.42652076	0.123485312	0.347158708	0.104316546	0.185334728	0.024811401	0.194000455	1.008644146	0.106651991	0.219304862	0.072915137	0.415984157	0.348903642	0	0	0.047114396
TCGA-AA-A00F	2.83561643835616	0	0.4164027	0.1301857	3.113382	0	0.102314	2.032045	0.9174352	0.4264365	0.2837213	0.08291475	0.1299723	0	0.4833574	0.5188161	0.5644263	0.6923077	0.7445974	0	0.08622881	0.2379444	0.1276043	0.8819715	0.4327089	0.1077143	0.1214384	0.1020374	0.4548656	0.2752885	0.4637395	0.0593614	0.1315465	1.09588	0.3262141	0.3439116	0.3444694	0.3264021	0.02184829	0.1708319	1.563208	0	0	0	0.6959797	0.6235078	0	0.1033408	0.1866949
TCGA-AA-3866	1.41917808219178	0	0.092244018	0.108148159	3.811471559	0.561166389	0.127491732	1.760015855	0.346424514	0.448717134	0.141416179	0	0.215941733	0.573712792	0.272008102	0.629911579	0.117220388	1.955392744	0.859102428	0.259914083	0.125356354	0.724774424	0.042401486	0.545245334	0.134797848	0.134220967	0.453967163	0.042382386	0.18893353	0.163348781	0.101974962	0.197251358	0.136598284	0.333375763	0.054198674	0.47615839	0.171695069	0.271149562	0.254098104	0.21287081	1.151024786	0.234051985	0	0.373368643	1.338910578	0.371581335	0.091348445	0.386313906	0.103394393
TCGA-AA-A01K	2.58356164383562	0	0.1494999	0	2.029669	0	0.04591686	2.128878	0.8983204	0.4593069	0.2037273	0	0.09999337	0.4132517	0.3638709	0.3940307	0	1.242786	0.7425853	0	0.5804716	0.2847617	0.1374402	0.8100392	0.1941928	0.2417021	0.2179984	0.03052851	0	0.4941802	1.101806	0.08880147	1.180719	0.7481106	0.7027184	0.2057893	0.1236739	0	0.1961032	0	0.4464363	0	0.7799994	0.1152607	1.742554	0.07299659	0.3947958	0	0.0558571
TCGA-CM-5863	0.832876712328767	0	0.130590496	0	1.434960739	0.04074088	0.68956791	1.393501047	0.784696942	0.185174661	0.472275788	0	0.147815926	0.166607012	0.174909839	0.361040565	0.187225321	1.052190493	0.718515557	0.226438259	0.343234544	0.373115703	0	1.53639302	0.469745844	0.267973475	0.124508671	0.052308598	0	0.142310156	0.335621639	0.078762854	0.14280601	0.647901021	0.047218116	0.456314346	0.249302463	0.413396649	0.01581224	0.278180938	1.067058334	0.152930317	0.104821803	0.627326402	0.689274546	0.127527339	0.477498931	0.056093054	0.521699649
TCGA-A6-3809	0.86027397260274	0	0.0390906466666667	0.01669752	2.935625	0.00871938	0.0491450533333333	1.67800866666667	0.180834523333333	0.407757066666667	0.5771883	0.0319037533333333	0.258240043333333	0.852859833333333	0.2901219	0.220634533333333	0.0451821433333333	2.13468866666667	0.5701863	0.2407764	2.821576	0.3968784	0.01796866	0.18410446	0.26637145	0.537988	0.1399075	0.24337818	0	0.572873433333333	0.0515515033333333	0.9292643	0.553338933333333	0.161757466666667	0.0167359933333333	0.337866333333333	0.234765566666667	0.334912666666667	0.3532371	0.21282384	0.442987366666667	0.10802938	0.4338033	0.285287356666667	1.69149566666667	2.772033	0	0.2218025	0.115007006666667
TCGA-NH-A8F7	1.48767123287671	0	0.0630015	0.02224432	0.82123075	0.294723905	0.07267759	1.065981	0.30328913	0.030516635	0.01106414	0.062668095	0.059344815	0.03933447	0.19206865	0.297951	0.02524466	0.3039358	0.194830145	0.026730055	0.100967125	0.05420885	0.06474191	0.29854615	0.14243099	0.3095435	0.050326905	0.067771295	0	0.033598195	0.087103771	0.02629122	0.14755078	0.77681785	0.09232917	0.18734705	0.04874799	0.0836566	0.0111994	0.064558535	0.28237585	0.079005695	0	0.1877893	0.08129073	0.5868682	0	0	0.043533635
TCGA-D5-6932	0.947945205479452	0	0.2064512	0	3.122029	0.009967824	0.1494633	1.64925	0.1181459	0.1812222	0.1406682	0.02936349	0.02630198	0.1630509	0.1159583	0.5370683	0.1332576	0.7845579	0.6885298	0.1108026	0.1145142	0.280886	0.04518987	0.5375188	0.4405645	0.19073	0.1863606	0.05420341	0	0.208909	0.1110961	0.09810401	0.1514044	0.6450043	0.02310514	0.2435862	0.2683794	0.1155923	0.03094948	0.1814956	0.6165043	0.1496661	0.05129223	0.06821518	0.6291593	1.363259	0.03894226	0.09149298	0.03305812
TCGA-AA-3675	3.92054794520548	0	0.08151915	0	5.576451	0.0275512	0.2587208	3.112945	0.02721307	0.2875542	0.1110882	0.05410739	0.1635729	0.2253375	0.05087465	0.2083459	0.07673453	0.4065992	0.5128938	0.3062598	0.09847257	0.05175819	0.09992433	0.4684669	0.1235375	0.1098293	0.2839671	0.05548851	0.07420753	0.1154855	0.1201583	0.01936863	0.03219107	0.5993031	0.06386293	0.3366378	0.1348735	0.2662489	0.07841606	0.0278698	0.9621374	0	0	5.530732	0.2629423	0.3140055	0.03587898	0.1011552	0.04061027
TCGA-A6-2680	1.43013698630137	0	0.201110924	0	1.912571093	0	0.092652729	2.075464734	0.201407111	0.022884108	0	0	0.239135175	0.092652729	0.351427312	0.192749018	0.113584243	0.780185817	0.266385056	0.125925809	0.034705095	0.510757902	0.020543102	0.412759351	0.26123291	0.04335249	0.325840906	0.03422308	0	0.094969047	0.329372419	0.103530198	0.344138708	0.59637145	0	0.276832851	0	0	0.017586861	0.068755871	0.629155044	0.113395877	0.233172086	0.310103012	0.427545	1.811185662	0	0	0.050093563
TCGA-CM-5862	0.419178082191781	1	0.06923615	0	2.027081	1.432073	0.1275897	2.000648	0.04160287	0.08508539	0.1415248	0	0.2222821	0.1148307	0.1011092	0.308562	0.1876967	0.3453344	0.6396632	0.2341024	0.04301233	0.1186905	0	0.6138722	0.5665858	0.2753643	0.1009591	0	0.1134472	0.1373184	0.06123197	0.0345455	0.03280877	0.2078783	0	0.2287316	0.1030962	0	0.01089828	0	0.4075985	0	0	0.3523037	0.1918549	0.7504947	0.05485117	0.05154808	0.1241686
TCGA-AA-3555	2.4958904109589	0	0.1513043	0	1.551788	0.01917624	0.3920995	1.180173	0.3977587	2.924684	0.07731982	0.1129798	0.03795009	0.0784199	0.3186888	0.7749146	0.2243174	0.3773358	0.3945626	0	0.234991	0.2701862	0.06954951	0.9921637	0.1105518	0.3485826	0.05515738	0.2664864	0	0.1607608	0.157973	0	0.1568398	0.2418642	0.04444999	0.2343072	0.1877498	0	0	0.1163879	0.3388684	0.1919532	0.1973534	1.137355	0.3618678	0.3786228	0	0.4224371	0.007066408
TCGA-DM-A28G	5.06575342465753	1	0.09262315	0	1.077066	0.01878243	0.2218939	1.013668	0.1391393	0.1612535	0.03786598	0.08299468	0.2230244	0.07680944	0.1664768	0.3395529	0.03138725	0.6929751	0.3174491	0.1043929	0.08631194	0.07939127	0.110697	0.7254194	0.5594544	0.08535599	0.3444072	0.06525342	0.3794201	0.2886755	0.2320933	0.1089341	0.1536189	0.6488922	0	0.1912462	0.1379206	0.1089056	0.03644892	0.08549829	0.4267405	0	0	1.842381	0.5072106	0.2668291	0.6237225	0	0.1280439
TCGA-5M-AATE	3.28767123287671	0	0.03230596	0	1.782997	0.01637777	0.1339515	2.830002	0.1941212	0.03308442	0	0	0.06482376	0.06697577	0.08165438	0.1277212	0.02736884	0.563972	0.1684913	0	0.163067	0.1846055	0.1633497	0.3103057	0.06294571	0.4308998	0.1531012	0.2572835	0.1323377	0.2059505	0.1666651	0.04605462	0.1530875	0.6376663	0.1138897	0	0.04008769	0.09496277	0.03813898	0.04970148	0.6615223	0	0	0.4856883	0.3943166	0.9622197	0.06398462	0.03006577	0.08449251
TCGA-DM-A28H	9.75616438356164	0	0.2631511	0	0.7498797	0.1104055	0.3678852	0.8994322	0.1090505	0.08363547	0	0.02710295	0.05462356	0.1504985	0.2905135	0.3391785	0.01537485	1.086239	0.5949583	0	0.1902572	0.1814835	0.06673751	0.1340914	0.2475248	0.09242455	0.05292728	0.2279171	0	0.0642754	0.01337523	0.05821169	0.03224968	0.4843517	0.1492848	0.4121953	0.0450397	0.2133869	0.02142513	0.05584108	0.2322624	0	0	0.06296366	0.3532237	0.3721758	0	0.03377977	0.06102632
TCGA-AA-A024	3.25479452054795	1	0.1289079	0	0.5630768	0.2614036	0.2494315	0.7053839	0	0.02640282	0	0.231015	0.03448814	0	0.362021	0.2779832	0	0.3857781	0.1920906	0.1452884	0.02002071	0.1473233	0.07110556	1.523924	0.4018675	0.1250462	0.09398573	0.01579412	0	0.0365239	0.1773415	0.0183768	0.06108527	0.9317626	0.06059264	0.5323321	0.1919504	0	0.04058211	0	0.131981	0.2616638	0	0.5366777	0.1871082	0.2769452	0	0	0.01926535
TCGA-CM-4747	0.668493150684932	0	0.2067765	0	0.8543888	0	0.04082694	0.6026057	0.354996	0.211759	0.06038133	0	0.01975756	0	0.1825072	0.276035	0.1001006	0.442009	1.232502	0.1664657	0.04587786	0.3375942	0.02715663	0.3492101	0.3453328	0.4584732	0.2584442	0	0	0.1255428	0.4499223	0.0210554	0.1049836	0.2299395	0.06942462	0.2439699	0	0	0.02324868	0	0.4536555	0.1499019	0.3082382	0.2049679	1.110884	0.3173127	0.1170108	0	0.01103673
TCGA-G4-6314	2.99452054794521	0	0.195230631	0	2.016705299	0.029692134	0.350780239	1.621195157	0.469243578	0.449853712	0.33920833	0.058311931	0.326451218	0.323797144	0.219311942	0.4911722	0.08269736	0.8277015	1.687340264	0.055009736	0.2349902	0.474131532	0.05384459	0.569782116	0.266274442	0.288807652	0.185043471	0.200331251	0	0.276576727	0.916060488	0.100889624	0.43943898	0.472193136	0.022941848	0.483729336	0.266482686	0.229550713	0.076826869	0.120141927	1.06188806	0.09907226	0.05092973	0.090310768	0.689116139	0.462329311	0.3093363	0.09084637	0.094826306
TCGA-AA-3930	0.167123287671233	1	0.1928913	0	2.599791	0	0.2369758	1.566278	0.3863508	0.09876966	1.31429	0	0.3225396	0.1332989	0.2527981	0.3004157	0.3268259	1.282798	0.5269639	0.1811687	2.14699	0.4592651	0.08866569	0.2137803	0.1879171	0.4833749	0.1171963	0.01969461	0	0.1366314	0.236933	0.1260331	0.3046832	1.143994	0	0.5310369	0.1595695	0.7560006	0.1771147	0.1978373	0.5760118	0.3262839	0	0.4461432	0.5090535	0.7848618	0.1273457	0.05983855	0.06005774
TCGA-CA-6718	0.838356164383562	1	0.105567691	0.090013831	4.469632074	0.00973062	0.159170798	2.704068423	3.517698081	0.727295484	0.196172427	1.719883588	0.198989591	0.795853991	0.269521038	0.551881837	0.19512965	1.48390771	0.943863067	0.757160537	0.34282009	0.658084308	1.888099932	0.723273029	0.411381261	0.442204179	0.328865756	0.382153313	0	0.625408594	0.117882997	0.246264254	0.648052535	0.474909438	0	0.475579146	0.119087641	0.225683091	0.166171366	0.79729445	0.90889122	0.487015129	2.753939768	0.177578305	1.912211665	0.36082016	0.760310997	0.375126069	0.060957168
TCGA-AD-6963	2.28493150684932	0	0.08277305	0	3.385935	0.1426724	0.09152142	2.238845	0.09947394	0.2288725	0.03383908	0.02472284	0.4096859	0.2059232	0.1766676	0.5176378	0.07012334	0.371568	0.2836896	0.09329117	0.09641626	0.3547416	0.0228288	0.2813264	0.1128939	0.1124108	0.1388031	0.06338476	0	0.1758927	0.1220065	0.1150493	0.09805866	1.095338	0.3112572	0.1709079	0.06162665	0.04866196	0.07166	0.2292177	0.6885637	0.2100212	0.2159297	0.2105926	0.8082418	1.378177	0	0.1848799	0.2876136
TCGA-AA-3982	2.25205479452055	0	0.10147	0.1189648	2.919905	0.05144106	0.0467477	1.881254	0	0.441639	0.05185341	0.1515365	0.1187698	0.631094	0.2422205	0.4011605	0.04298148	1.771384	0.6048176	0.142955	0.1575933	0.6523072	0.02332118	0.4310913	0.2471333	0.1968605	0.1109715	0.02331068	0	0.9343697	0.3614502	0.2712249	0.2704688	1.50919	0.05961947	1.466591	0.06295584	0	0.1597213	0.2341616	0.3246531	0.2574612	0.2647044	0.1760194	1.305458	0.2229523	0.1004849	0.5193857	0.06634577
TCGA-CM-6680	0.249315068493151	0	0.11724849	0.049986817	1.679895503	0.497135292	2.897271134	1.775355315	0.768574918	0.240147509	0.065363523	0.095509218	0.128326812	0.574543598	0.293356003	0.796830021	0.072240084	1.329111576	0.68298277	0.180201094	0.107603902	0.517720605	0.088192153	1.141948019	0.290754265	0.372227082	0.186512641	0.137125998	0	0.362404423	0.408490535	0.182341848	0.151527982	1.689047598	0.100203988	0.528200779	0.185170143	0.375981534	0.125834869	0.229577463	0.654783399	0.162270637	0	0.665640777	0.963442548	0.57249143	0.042221875	0.396793164	0.019912331
TCGA-DM-A1D6	1.56164383561644	1	0.02468274	0.05787677	0.8195441	0	0.4662296	1.402473	1.557303	0.04423564	0.1261342	0	0.02476367	0.02558577	0.2460799	0.7806634	0.02091063	0.123112	0.1103421	0.03477403	0.6181491	0.01763053	0.005672915	0.3282688	0.6252018	0.5626679	0.013497	0.1001764	0	0.02622541	0.1000507	0.006597588	0.0365511	0.2127196	0.02900506	0.3057862	0.03062822	0	0.03885246	0.03797345	0.2527116	0	0	2.583292	0.1628486	0.3645696	0.04888621	0.01148558	0.0599438
TCGA-AZ-6603	2.46301369863014	1	0.1208207	0.04047197	1.711627	0.4112572	0.294217	1.5037	0.2074263	0.1767601	0.1234841	0.1546586	0.07503901	0.2862652	0.4750331	0.6265455	0.04386704	1.506567	1.015938	0.09726689	0.07371845	0.1479438	0.07140503	0.5483725	0.4203751	0.2385883	0.1887631	0.1295285	0.2828162	0.2567441	0.2925737	0.1261037	0.2351464	1.281171	0.06084784	0.3563827	0.1499235	0.202943	0.1494278	0.106216	0.6737288	0.08758859	0.04502636	0.1596853	0.8085232	0.5140851	0.03418506	0.06425295	0.01934649
TCGA-A6-6142	1.00821917808219	0	0.1043507	0	3.480168	0.1719297	0.1201871	2.876948	0.6270262	0.187014	0.1599765	0	0.174488	0.4867577	0.3370136	0.5719432	0.2210085	0.910836	1.55497	0.07350669	0.03038762	0.1490724	0.02398326	1.503466	0.1524895	0.2024492	0.2853048	0.1158669	0	0.1478301	0.1474029	0.01394624	0.1390736	0.5439375	0.1226241	0.2693261	0.517945	0.07668422	0	0.2006744	1.168544	0.1985778	0	0.03016941	0.3872652	0.4649325	0.1550063	0.02427867	0.03898817
TCGA-AZ-4315	4.86575342465753	0	0.07894661	0	5.793987	0.106727	0.09698952	2.85471	0.5534402	0.1077986	0	0	0.05280364	0.1091132	0.1034653	0.1891603	0.08917558	0	0.7450623	0	0.04087073	0.2255618	0.09677097	0.4277585	0	0.2807992	0.1151187	0.08866677	0	0.03728035	0.258592	0	0.155876	0.965692	0.1236952	0.7607002	0.06530863	0.3094161	0.0207113	0.1619418	0.6062149	0	0	0	0.8854685	0.8480431	0	0	0.1376505
TCGA-AD-6895	2.09041095890411	0	0.482245	0.105189	3.85944	0.0454843	0.3565094	2.118289	0.4380292	0.379013	0.252169	0.03349722	0.1200189	0.1860049	0.1007868	0.5643066	0.07600864	1.118758	0.6851882	0.4424039	0.1828895	0.6408572	0.1134135	0.3977446	0.3059221	0.07615322	0.1308283	0.06870451	0	0.3177584	0.3912285	0.08393617	0.07971638	0.3491964	0.05271567	0.4168166	0.2783285	0.1977977	0.07943959	0.5866308	0.8898829	0.1138239	0.1170261	0.2334551	1.139491	1.117098	0.04442447	0.3966181	0.04609242
TCGA-CA-5796	0.271232876712329	0	0.122994294	0	0.490055388	0	0.212490141	0.424330313	0.508098665	0.283405526	0	0	0.041132518	0.191241127	0.25042478	0.187871833	0.026049456	0.306733935	0.25200803	0.346558507	0.023877842	0.351412267	0.01413409	0.886040021	0.05991126	0.119309728	0.044837091	0.037673928	0.755748069	0.392044311	0.105753764	0.038355139	0.072853763	0.632570815	0	0.825356444	0	0.090384855	0.060500665	0.047305498	0.137732004	0.078018768	0	0.106678724	0.699897993	0.255232294	0	0.114465492	0.022976956
TCGA-A6-2672	1.37808219178082	0	0.05498767	0.14742195	4.787729	0.063696255	0.3927532	5.0961595	5.0402585	0.4786074	0.98782695	0.95055095	0.29429485	0.5536504	0.28009745	0.39812895	0.23968315	0.9992525	0.8779102	0.08857535	0.28375307	0.5497363	1.3760005	0.4062834	1.59239945	0.5068529	0.4065869	0.361039045	0	0.32827955	0.4573051	0.4466807	0.28380055	1.2866416	0.101557285	0.29198205	0.5264202	0.13846195	0.194748	0.132958805	0.8946728	0.5183276	1.1270035	0.19077355	1.886511	6.960267	0.24904295	0.33630365	0.159995655
TCGA-AA-3510	5.33150684931507	0	0.06006768	0	1.536453	0.0406024	0.1106938	1.023553	0	0.2255553	0.1227836	0	0.1205292	0.3320815	0.3036461	0.6908418	0.06785053	0.8988122	0.5668914	0.6770058	0.1088398	0.3432439	0.2577036	0.4734055	0.03901243	0.06797958	0.1751795	0.03679822	0.1640402	0.1134612	0.05902604	0.07849514	0.0237201	0.4007786	0.09411525	0.4961055	0	0.1177119	0.07879248	0.1232157	0.4356225	0	0	0.1852427	0.9643465	0.9189865	0.07931266	0.03726827	0.01496191
TCGA-AA-3527	0	0	0.02181903	0	0.50229225	0.154858721	0.030156383	0.44510821	0.065553492	0.067034369	0.133800063	0	0.072968559	0	0.171572548	0.188206431	0.073938241	0.108828413	0.71529442	0	0	0.062340085	0.08023582	0.145091412	0.042512723	0.063496178	0.27043744	0.033416532	0	0.030910292	0.525296297	0.031104697	0.103393312	0.169842326	0	0.270308629	0.108298834	0	0	0	0.726023428	0	0.34151525	0.15139735	1.741852955	0.543334578	0.086428779	0	0.008152165
TCGA-F4-6807	1.35342465753425	0	0.142357413	0.278169658	3.361216696	0.036084633	0.464558405	2.724720885	0.320775909	0.388767232	0.436486657	0.035433031	0.166628185	1.032959277	0.333160245	0.622500175	0.261303889	1.597605197	2.209711488	0.334264644	0.11054782	0.677892443	0.119967716	1.069356301	0.208029457	0.535109534	0.397868109	0.145349911	0	0.705855506	0.419666362	0.384743043	0.238915751	0.844289263	0.05576212	0.734840897	0.50050234	0.348714124	0.401478661	0.328517107	1.745977054	0.240803584	0	0.137192518	2.261972737	0.185357666	0.234958837	0.375376755	0.18172732
TCGA-G4-6310	3.75890410958904	0	0.3503156	0	1.861052	0.5683053	0.07262641	1.319989	0.3157484	0.2152542	0	0	0.4334725	0	0.3049829	0.7176656	0	0	0.6525236	0.09870771	0.408057	0.4003607	0.04830851	0.7117967	0.1706408	0.5607049	0.2171005	0.1233995	0	0.04962805	0.3958769	0.01872756	0.08300161	0.6330315	0.2058306	0.3616619	0.2608189	0.2059492	0.08271341	0.05389471	0.425917	0	0.09138668	0.04051269	0.173345	0.3078887	0	0.03260237	0.03926615
TCGA-AA-A00K	1.5041095890411	0	0.074619888	0.233294363	1.541626162	0	0.091673937	1.319279623	0.523108494	0.050945305	0.203372841	0	0.049909696	0.103133179	0.097794787	0.339707172	0	0.248124811	0.444775959	0	0.115892327	0.14213312	0	0.238913369	0.145391186	0.072384485	0.145079411	0.068569627	0	0.211423016	0.268861639	0.044323484	0.147333113	0.49787268	0.233831908	0.308146907	0.061729348	0	0.156609642	0.076533219	0.57299086	0.378668089	0	0	0.508728086	0.352203014	0	0	0.102226513
TCGA-D5-6529	1.68219178082192	0	0.1256875	0.09068171	3.315747	0	0.1158096	1.501289	0.3195228	0.495062	0.3359675	0	0.310399	0.801759	0.2063558	0.2501895	0.08190727	1.494918	1.498335	0.2724209	0.1351423	0.7182144	0.07999524	0.9500888	0.169541	0.3048057	0.2960605	0.1421497	0	0.821803	0.5130331	0.2549829	0.2977962	0.5160627	0.2272266	0.6787361	0.383908	0.0568394	0.2054507	0.4462279	1.101237	0.4906286	0.2017726	0.2236199	2.289992	0.3918218	0.03829761	0.2339439	0.2059023
TCGA-AA-A01I	2.58356164383562	0	0.03431474	0	2.957263	0.6784495	0.1264717	2.462426	0.1030958	0.2108496	0.03507118	0.05124602	0.0229515	0.1422806	0.07709479	0.1356629	0	0.4278855	0.2556686	0.09668794	0.1199122	0.2941263	0.09464002	0.2028311	0.4345878	0.01664338	0.08756513	0.05780951	0	0.1701439	0.03371969	0.06726264	0.08130321	0.5056023	0.1612951	0.07085229	0.04258033	0.1008675	0.04051046	0	0.3732858	0	0	0.1190511	0.4980742	0.1926816	0	0.03193525	0.1025671
TCGA-AA-A01Z	3.08493150684932	0	0.053934829	0	3.581609741	0	0.273328266	1.715127564	0	0.027617232	0	0	0.018037222	0	0.242350333	0.329538385	0.228461485	0.134507398	0.241111142	0	0.020941578	0.154099512	0	0.338728698	0.05254396	0.052319092	0.039323464	0.033041157	0	0.152815349	0.397496572	0.009611028	0	0.479812706	0.190138913	0.222726824	0.06692643	0	0.063673062	0.16595332	0.207077261	0	0	0	0.124545498	0.645204106	0.32046714	0.100389645	0.060454424
TCGA-G4-6588	2.18082191780822	0	0.0836748	0	2.547184	0.0121199	0.1597045	1.612294	1.077403	0.1713821	0.1954728	0.03570312	0.08794673	0	0.1812779	0.5241363	0.1012676	0.5962159	0.3740612	0.134725	0.3156063	0.2732239	0.01098929	0.1943046	0.3027774	0.1449431	0.1220133	0.08421325	0	0.1693419	0.1761939	0.03408138	0.04248298	0.392131	0.02809358	0.2961769	0.02966573	0.1405489	0.235197	0.1103404	1.101466	0.3032989	0.8731284	0.0552953	0.4653068	0.554475	0.09469992	0	0.1205863
TCGA-CK-5912	4.09041095890411	1	0.1045615	0	1.365563	0	0.4756983	1.210823	0.07853664	0.1472365	0.02671662	0	0.01748406	0.108387	0.4111065	0.4039877	0.06643652	0.5215294	0.4674336	0.07365522	0.02029935	0.2240604	0	0.8401657	0.1527976	0.177501	0.2096462	0.05604875	0	0.1296127	0.03210885	0.03726512	0.07741925	0.7775855	0.03071796	0.3238444	0.09731091	0.2305175	0.0822938	0.04021597	0.1839994	0.1326527	0	0.06046075	0.2155821	0.9700347	0.1553196	0.04865546	0.009766736
TCGA-CM-6679	0.334246575342466	0	0.1409419	0	2.756523	0.009526887	0.1255363	1.78376	0.2822989	0.2982987	0.5377823	0.05612913	0.06284622	0.2727168	0.4222048	1.357571	0.1751238	0.984181	1.330145	0.4236043	0.102152	0.5637675	0.103658	1.083022	0.4393833	0.2779966	0.2329218	0.1007332	0.2309409	0.3993353	0.5539912	0.1741336	0.2894138	1.1807	0.1324984	0.2716127	0.6762467	0.4419158	0.1626922	0.1734669	1.034163	0.09536366	0.09804653	0.282523	1.946566	0.5505437	0.07443921	0.122424	0.1895746
TCGA-AA-3519	0.756164383561644	0	0.073370729	0	1.342582441	0	0.050703349	1.672852626	0.220436359	0.150277397	0	0	0.098148385	0	0.309078237	0.501030561	0.062157927	0.731913387	0.437330278	0	0.028488064	0	0.033726068	0.162632692	0.142957295	0.088965934	0.267470135	0.022473917	0	0.103941866	0.378516623	0.052297794	0.043460014	0.632320103	0.344876239	0.151494218	0.091043971	0.215671884	0.895054961	0.112878045	0.328649314	0.186164537	0	0	0.532483559	1.074745962	0.145316784	0	0.068533099
TCGA-AZ-6607	0.265753424657534	1	0.1641072	0.05920047	6.631789	0.6399654	0.1802887	4.711139	1.896333	0.5171126	2.322343	0	0.2701871	0.3140513	0.4183315	0.4174072	0.2352776	0.6296383	1.392011	0.3556935	0.2548753	0.2524726	0.01160532	2.285147	0.3689428	0.5816594	0.8559525	0.06573386	0	0.3219026	0.1798685	0.01799595	0.02990965	0.1824904	0	0.4691698	0.09398616	0.519497	0.04967632	0.1553678	2.859561	0.3203011	0.06586242	0.1167901	0.8162084	0.8505994	0	0.1409792	0.2075269
TCGA-A6-5659	0.783561643835616	0	0.17797689	0.0941613566666667	2.291582	0.296353733333333	0.324429433333333	1.76402733333333	0.08486845	0.172220133333333	0.103109573333333	0.0417127866666667	0.157663866666667	0.0280552433333333	0.3038866	0.331376733333333	0.0299653033333333	0.7099257	0.561211466666667	0.0344484833333333	0.214599536666667	0.143457233333333	0.0483380183333333	0.2662164	0.5733658	0.414725866666667	0.07321548	0.0722881866666667	0	0.134851876666667	0.127096526666667	0.40491808	0.298585933333333	0.6964232	0.336051166666667	0.25339759	0.141879556666667	0.147591433333333	0.0647527833333333	0.0356076533333333	0.271081566666667	0.0554105666666667	0	0.09668122	0.772920533333333	1.95207526666667	0.229822863333333	0.0288295833333333	0.0339913
TCGA-CM-5344	0.832876712328767	0	0.218111817	0	4.139201853	0.14374566	0.080388095	2.025822553	1.0484786	0.223367523	0.245211882	0.097719203	0.051059619	0.316528124	0.355272441	0.290047215	0.12934538	1.08789268	0.828793039	0.061456921	0.372624984	0.155794155	0.130336309	0.676849708	0.446223029	0.597707275	0.198779533	0.08017083	0	0.139046283	0.15538891	0.031093508	0.142114668	0.509343703	0.102522605	0.630493268	0.757819159	0.12822712	0.034332416	0.134222656	0.795547115	0.166025413	0	0.580147757	0.338172073	0.415341698	0.431988452	0.121792365	0.220029283
TCGA-AA-3831	1.4986301369863	0	0.215047034	0	2.469511082	0	0.027019953	1.1166806	0.058735567	0.380395356	0.039961373	0	0.02615177	0.081059858	0.351378414	0.154579264	0	2.047702812	0.203922681	0.220339503	0.030362733	0.558563725	0	0.173334806	0.152364661	0.237050939	0.470367352	0.029941029	0	0.387736319	0.259344689	0.111478546	0.416879268	0.22826668	0.045946371	0.322926721	0.048517579	0.229864265	0.076931809	0.060153017	0.950749749	0.198415174	0	0	0.877082341	0.324549856	0	0.072776369	0.233737436
TCGA-DM-A0X9	9.97534246575342	0	0.06871379	0.0322244	1.614297	0.01393401	0.6204725	1.17583	0.5161124	0.1125913	0.04213711	0	0.05515127	0.1424554	0.1003464	0.1580562	0	0.8910952	0.6553157	0.1548908	0.0480238	0.2748552	0.1137075	0.2284653	0.3480974	0.1099813	0.0651283	0.03999019	0	0.3893781	0.06077	0.0636719	0.4558573	0.7908547	0.1453439	0.1418787	0.1023183	0.04039658	0.01081606	0.2748552	0.3957294	0.06973937	0	0.2542878	0.7117611	0.2918938	0	0.2557959	0.04621191
TCGA-D5-6541	1.2986301369863	0	0.237651015	0.035951655	3.013759843	0.007772848	0.568625603	1.920833492	0.737035405	0.392544428	0.51712025	0.114487335	0.107678154	0.858236158	0.064588257	0.303080814	0.259783555	3.517812322	1.485073849	0.259209447	0.214314016	0.700906218	0.133907359	0.674044705	0.358486418	0.249122917	0.268288263	0.08923136	0.251228434	0.39097425	0.071565614	0.114751352	0.163473554	0.426246116	0.108103479	0.759788016	0.703943905	0.450690778	0.054301979	0.283058281	3.796914297	0.272320373	0.079994731	0.088656293	1.58311695	0.172185883	0.121467728	0.185498732	0.037235643
TCGA-A6-3810	0.676712328767123	0	0.2355468	0	4.08583533333333	0.0630807166666667	0.359203133333333	4.19757833333333	0.6384914	0.527084433333333	2.58290056666667	0.3568478	0.2947984	0.977510866666667	0.458917533333333	0.4726449	0.437797766666667	1.516532	0.875467833333333	0.0460573	1.31005473333333	0.354925633333333	0.438120866666667	0.797311733333333	1.30415733333333	2.16899356666667	0.197130366666667	0.226682666666667	0.206023766666667	0.536330466666667	0.169924273333333	0.98970796	0.590222633333333	0.508973866666667	0.0746435333333333	0.4027023	0.4238089	0.530727733333333	0.658247536666667	0.309501766666667	0.7095747	0.284302266666667	0.0966988333333333	0.58146869	1.3322287	4.92602596666667	0.260281396666667	0.203607733333333	0.490936133333333
TCGA-A6-4107	0.632876712328767	0	0.140062477	0	4.771572868	0.040574759	0.04609102	2.184974637	0.240460722	0.327857088	0	0.059763115	0.214128302	0.829638364	0.179815892	0.345185687	0	1.497000275	1.2224591	0	0.03107591	0.457346863	0.018394866	0.51743472	0.077971743	0.184390381	0.393885491	0.03677316	0.327857088	0.680303458	0.314591195	0.064179572	0.308151392	1.479646115	0.141076754	0.165255901	0.29794312	0.117631722	0.125982122	0.184697771	0.845044446	0	0	1.064420377	1.531342843	0.635036737	0.079258655	0.14897156	0.044855173
TCGA-AA-3875	1.5041095890411	0	0.03099983	0	3.44012	0.4714686	0.01428176	2.031109	0	0.507949	0.06336639	0	0.4354206	0.2570718	0.2960006	0.4679467	0	1.082341	0.6929108	0.5240855	0.04814591	0.08857095	0.2279933	0.6184247	0.4228057	0.2556049	0.1130087	0.1899089	0	0.1756657	0.2893915	0.2541076	0.1468982	1.327188	0.1457135	0.8961085	0.3846694	0.1822468	0.1463881	0.1907682	1.071186	0	0.1617382	0.2151009	1.063539	0.3027269	0.1227954	0.2308017	0.2779765
TCGA-G4-6295	0.695890410958904	0	0.1378787	0.5290392	1.990275	0.4066835	0.121268	0.9476025	0.5272212	0.474949	0	0.03743811	0.07545313	1.091412	0.295691	0.9100046	0.06371319	1.000302	0.5229849	0	0.07786898	0.501377	0.04609324	0.2037468	0.0976895	0.0851125	0.2924401	0.07294809	0.2053833	0.5682273	0.1170121	0.3216381	0.207888	0.5993566	0	0.3623312	0.03110733	0.2947577	0.2762216	0.4628095	0.3047894	0.3180376	0	0.05798237	1.438945	0.7772664	0	0.513271	0.06088149
TCGA-DM-A28F	2.9972602739726	1	0.1148839	0.07696653	2.518783	0	0.0302443	1.230899	0.4684303	0.2184968	0.03354754	0	0.04390877	0.4082981	0.4102091	0.7078317	0.01390384	0.3274371	0.3423858	0	0.06372372	0.1875655	0.02263211	1.200494	0.447685	0.09552194	0.1256414	0.03518965	0.0672298	0.2557534	0.1411146	0.0614159	0.09721382	0.6661412	0.1350018	0.2710967	0.02036523	0	0.09041786	0.0757476	0.525101	0.04164234	0.08562772	0.01897984	0.5359902	0.6571077	0	0.01527392	0.02146182
TCGA-CM-4743	0.504109589041096	0	0.06371468	0	7.446654	0	0.01761219	4.737314	1.64626	0.2870999	0.2344292	0.07612179	0.03409258	0.2113463	0.2791377	0.3114341	0.1079551	0.6991479	0.5886511	0.07181102	0.3760306	0.5461259	0.21087	0.3107043	0.02482864	0.2225015	0.4180849	0.1053875	0	0.3971549	0.02504392	0.05449809	0.1962501	0.3471747	0	0.2631133	0	0.299661	0.06017498	0.1176271	0.978504	0	0.1329698	0.02947346	0.6557749	1.319068	0.1009538	0.09487442	0.01428329
TCGA-F4-6808	2.80547945205479	0	0.05438865	0	3.057945	0.2895141	0.1002284	2.454016	0.1225547	0.0139248	0.138969	0	0.01818899	0	0.0840089	0.2541203	0.1151919	0.1356392	0.4660181	0.07662489	0.02111778	0.07769807	0.07500192	0.3717181	0.1059721	0.2703915	0.1387902	0.02498938	0	0.07705058	0.01336137	0.01453785	0.06443254	1.323027	0.1597823	0.2807511	0.1687239	0	0.1070147	0	0.4872458	0.06900052	0	0.1257969	0.2780998	0.7568588	0	0.02530859	0.03048155
TCGA-AA-A00U	1.41917808219178	0	0.07240911	0	2.521748	0	0.8562198	1.876844	0.2175473	0.1235899	0	0	0.06457468	0	0.2575787	0.1214473	0.1226865	0.3611604	0.395632	0	0.09371564	0.1379221	0.06656809	0.3210024	0.09405577	0.1053599	0.1231835	0.05175186	0	0.1367728	0.04743564	0.06021443	0.1143744	0.3623416	0	0.1993449	0	0	0.05698865	0	0.957581	0.1224831	0	0.05582562	0.3662608	0.318198	0.09560815	0.08985072	0.1442878
TCGA-AA-A017	1.25205479452055	0	0.1771596	0	1.947679	0.08981251	0.0510114	1.24366	0	0.1587499	0.09053245	0	0.0296234	0	0.1990119	0.6208076	0	0.331362	0.725979	0	0.1031801	0.3796277	0.1221515	0.5563106	0.1294432	0.07518541	0.2098942	0.04748196	0	0.1882321	0.1196851	0.07892329	0.1049377	0.6648916	0.1040915	0.09144877	0.7694157	0.2603786	0.15686	0.0681383	0.8218915	0.1123773	0.2310777	0.1024392	0.3652627	0.443323	0	0	0.06619149
TCGA-AA-A01X	2.16712328767123	0	0.05877908	0.1837691	2.62533	0.03973139	0.6408885	1.612898	0.176597	0.02006515	0.04004988	0.0585209	0.1441533	0.08123938	0.08803916	0.3661784	0.03319749	0.2931768	0.9050862	0	0.07607495	0.2799004	0.1801252	0.2461015	0.8016861	0.1235395	0.2714174	0.1860455	0	0.02775679	0.5390914	0.06284556	0.06963376	0.7407863	0.1381444	0.2427314	0	0	0.07710219	0.1205725	3.711121	0	0.1022245	3.716011	0.4007319	0.3061352	0	0	0.007320472
TCGA-CM-5861	0.917808219178082	0	0.06176412	0	2.369769	0	0.2703226	1.530515	0	0.06325241	0.1578141	0	0.02065554	0.06402378	0.1734565	0.3995734	0.05232508	1.309278	0.3451392	0.2610472	0.2158335	0.08823445	0.04258635	1.163698	0.2105997	0.4193969	0.06754761	0.02837811	0	0.04374958	0.0455198	0.01100618	0.01829251	0.377756	0.07257995	0	0.0383208	0	0.02430532	0.04751086	0.6323654	0	0.2416857	0.03571395	0.2241246	0.1583278	0	0.1724436	0.04038423
TCGA-D5-5537	3.78356164383562	1	0.1761865	0	4.277825	0	0.3030344	2.252368	0.5999164	0.180432	0.2160845	0	0.1335552	0.1948079	0.158335	0.3461649	0.0597044	0.703023	0.8051299	0.3309581	0.00912119	0.2349154	0.03239482	0.5033536	0.2975146	0.2620596	0.102765	0.08634727	0.09623039	0.3660764	0.6059594	0.07535021	0.08348908	0.6138916	0.02760526	0.1940192	0.3789511	0.06905293	0.02773306	0.07228165	1.142449	0.05960539	0.3064113	0.4075062	1.139172	0.3096969	0	0	0.05705087
TCGA-CK-4948	8.53698630136986	0	0.1222469	0.035831	2.692457	0.1859223	0.1865591	1.604491	0.3213708	0.289508	0.3279721	0	0.09198582	0.2534388	0.2746517	0.247143	0.2071294	0.9146104	0.6603478	0.08611318	0.3619245	0.1746385	0.06321693	0.5250066	0.04466042	0.1593483	0.1002705	0.08191096	0.06259633	0.1731832	0.51054	0.08441318	0.04525693	0.4375601	0.3591356	0.3470675	0.3792332	0.08983565	0.1142528	0.1880722	0.8507053	0.2326341	0.07972627	0.05301526	0.9023224	0.7200076	0.1815901	0.04266374	0.2141001
TCGA-AA-3968	1.83287671232877	0	0.04945269	0	1.444946	0.2005636	0.02278308	2.023604	0.07428829	0.3291881	0.05054283	0	0.1819211	0.1025239	0.4860851	0.8353637	0.04189514	2.466589	0.9948336	0.1393418	0.3456229	0.2825868	0.04546349	0.5298119	0.09635482	0.311813	0.4146391	0.06059069	0	0.5254349	0.4738025	0.2908067	0.4979731	1.044855	0.1162252	0.4084352	0.3681879	0.1453653	0.3308294	0.5325675	0.9493428	0.3764309	0.3870211	0.05719019	0.7830543	0.4587808	0	0.09204698	0.1016226
TCGA-D5-6530	1.7013698630137	0	0.068553948	0.053582396	0.755362944	0.034753989	0.378997436	0.899427796	0.343274555	0.351029251	0.09342021	0.136505665	0.12991535	0.236873397	0.089844932	0.279240182	0.058077265	1.538692522	0.357542139	0.193163058	0.195197385	0.293802634	0.168063757	0.363005693	0.244882297	0.249375987	0.208258955	0.027998009	0	0.307540627	0.039296338	0.081440749	0.162427472	1.696191712	0.053705858	0.754926066	0.056711295	0	1.303900321	0.210935224	0.453299003	0.231923804	0.059612129	0.184986844	0.919669392	0.195258971	0.090517834	0.233934092	0.042689272
TCGA-AA-3818	0.0821917808219178	1	0.018511373	0	2.097955612	0.037537973	0.383772368	1.919259157	0.222463629	0.189574302	0.529744303	0	0.111432396	0.076754474	0.207947142	0.172981541	0	0.830975083	0.66202836	0.20863647	0.057500116	0.158668912	0.136144934	0.177805727	0.07213601	0.134676181	0.107971983	0.028350752	0	0.131122226	0.190998849	0.072570792	0.219298496	0.802815394	0.21752996	0.535106087	0.045940634	0.326483006	0.014569136	0.056958071	0.54488935	0	0	1.498539723	0.73279174	0.488083498	0.293306416	0.172277377	0.013832674
TCGA-G4-6315	3.06027397260274	0	0.07604738	0	1.518747	0.03855285	0.1284631	1.560492	0.03807969	0.1168198	0	0	0.02543224	0.3153184	0.3203538	0.3462058	0.02147517	0.4425251	0.2455292	0.07142572	0.09842447	0.07242608	0.04660858	0.2715781	0.1481725	0.08606408	0.1016502	0.03105839	0.1038398	0.2513788	0.04981909	0.0225857	0.03003032	0.5708217	0.1489407	0.3140418	0	0.1490266	0.0598521	0.03899866	0.2757552	0	0.06612816	0.3517838	0.2843169	0.556977	0.05020604	0.09436536	0.08050437
TCGA-AA-3562	1.66575342465753	0	0.23108117	0	2.951244995	0.319495925	0.512944406	1.421779418	0.126229907	0.086054324	0.343527482	0	0.112406697	0.435518835	0.212387379	0.317109274	0	1.152580897	0.500862567	0.118384125	0.163133054	0.180063249	0.019312778	0.279388251	0.163725132	0.112079312	0.260377379	0.077216312	0	0.267844084	0.319967884	0.02246072	0.223981115	1.214752126	0.098744363	0.520506721	0.104270203	0.123501595	0.033067171	0.258552358	0.376393191	0	0.219207434	0.048588496	0.928618556	1.271906802	0	0	0.039244554
TCGA-AA-3872	0	0	0.4499691	0.168816	3.378518	0.03649849	0.1326738	1.736521	0.2163033	0.2949195	0.4414927	0.1075182	0.1565007	0.5970322	0.323502	0.4916364	0.121985	1.526154	1.528777	0.202859	0.2096544	0.5142504	0.09928115	1.981494	0.631246	0.3230021	0.3936828	0.1102627	0	0.407972	0.7251525	0.1282931	0.149258	0.920689	0.2961087	0.1486538	0.6253585	0.3174422	0.1274912	0.3322849	1.796715	0.182674	0	0.04162979	1.424999	0.6239686	0	0.1675067	0.3362406
TCGA-AA-3845	0	1	0.159689566	0	6.818226936	0.026985314	0.122616198	4.790686966	6.077140461	2.61660011	0.544032588	0	0.160213138	0.110354578	0.239182609	0.459149702	0.18038024	1.592991265	0.912178526	0	0.227346393	0.152085301	0.097871928	0.196647781	0.46671449	0.955251895	0.155237891	0.138589443	0	0.52786273	0.248457272	0.256105907	0.283768914	0.488339309	0	1.20898578	0.066051645	0	0.188522404	0.737028764	1.4305941	0.135060827	0	0.923375039	1.158937209	0.311887711	0.105426121	0.346771137	0.049720194
TCGA-AA-A010	2.91506849315068	0	0.3454059	0	1.998077	0	0.2864341	1.774005	0	0.2829831	1.270872	0	0	0.2864341	0.3104088	0.14897	0	0.3445614	0.1029405	0.3892972	0.5900958	0	0.06350861	0.5104151	0.5383977	0.1340234	0.05036655	0.04232	0	0.19573	0.2036497	0.1723409	0.245515	0.3072785	0.9741401	0.570549	0	0.4061256	0	0	0.9725104	0	0.3604235	0	0.7748173	0.4722256	0	0.2571635	0.02581055
TCGA-AA-3529	0	1	0.07163494	0	1.930993	0.3873698	0.06600509	1.352468	0	0.07336108	0.04880938	0.1426406	0.06388427	0	0.2145892	0.2746258	0.08091654	0.5954982	0.17791	0	0.5006538	0.06822375	0.175617	0.4763555	0.09305016	0.1621409	0.2959614	0.2267364	0	0.1014828	0.7508556	0.03404036	0.0282879	0.4115739	0.1122391	0.09860679	0.05926004	0.1403797	0.05637935	0.2938869	1.589091	0.1211735	0	0.44183	0.4726238	0.1748866	0	0	0.0535294
TCGA-A6-2675	2.31780821917808	0	0.06407324	0	2.216311	0.1169369	0.09446028	1.685383	0.4235062	0.2362218	0.576274	0	0.1114244	1.115812	0.2807085	0.3039754	0.1519877	1.150499	0.916589	0.2888606	0.1194148	0.4759727	0.1413712	0.7953344	0.1747786	0.3045536	0.2989779	0.08635457	0	0.417544	0.4596237	0.09134131	0.1669923	0.6270062	0.1204695	0.6879443	0.4452389	0.452021	0.1311128	0.3154375	0.8528092	0.3251478	0.1337181	0.2074753	0.9807433	0.375422	0.05076094	0.1431125	0.01915156
TCGA-AA-A01R	2.91780821917808	0	0.02123293	0	1.905066	0	0.1173853	1.462524	0	0.2174457	0.1736079	0.063419	0.1278153	0.2641169	0.2146677	0.3663017	0	0.2118101	0.3796801	0.3589655	0.4286999	0.9706482	0.1171208	0.282388	0.0827415	0.2162669	0.1857692	0.02601512	0.1739565	0.3007998	0.2503767	0.128644	0.150924	0.6020916	0.04990228	0.2630476	0.05269486	0.1248276	0.0501333	0.1306642	1.277173	0.1077492	0.886244	0	2.829775	0.4769024	0	0.3556903	0.01586636
TCGA-A6-5664	0.991780821917808	0	0.09208376	0.2878941	1.872228	0.05186958	0.1461251	1.62313	0.2766581	0.3562545	0.08365659	0.03055977	0.2942655	0.7636215	0.3275667	0.2868289	0.08667907	1.735107	1.189219	0.2882917	0.1509608	0.7015906	0.1504989	1.292708	0.2192889	0.4267759	0.4177448	0.07834955	0.08382458	0.3188827	0.3619477	0.2990095	0.2787824	0.9557236	0.07213935	0.7605299	0.1269606	0.3007539	0.43484	0.3777795	1.649882	0.259606	0.1067638	0.5679543	1.316333	0.2248096	0	0.03808817	0.7225034
TCGA-AA-A02H	0.167123287671233	1	0.5168602	0.6925418	2.135638	0	0.1020514	1.612604	0	0	0	0	0	0	0.290307	0.6369042	0.2502124	0.3682832	0.2200553	0	0.172015	1.054817	0	0.7637775	0.1438661	0.3939387	0.1615023	0	0	0	0.2176703	0	0.2624178	0.9031923	0.3470688	0	0.3664911	1.302258	0	0	0.1889935	0	0	0	0.4384381	0.2523683	0.8774437	0	0.05517503
TCGA-AA-3862	2.5041095890411	0	0.316226646	0	2.501264926	0	0.131118365	1.282615275	0.095007711	0.356231221	0	0	0.042301794	0.131118365	0.28418606	0.227308794	0	0.315453475	0.565465908	0	0.073669854	0.722803761	0	0.700944249	0.246457443	0.076688345	0.322781737	0.009686222	0	0.223993874	0.124297179	0.033810396	0	0.98462066	0.222961644	0.652937608	0.078479605	0	0.298658499	0.389202025	0.890354571	0	0	0	0.813680205	0.262487795	0	0.294298521	0.200856045
TCGA-D5-7000	0.854794520547945	0	0.1019834	0.08695763	1.740285	0.1880048	0.1793943	1.415159	0.5292377	0.5032149	0.2274142	0.05538297	0.1178205	0.1153249	0.1874665	0.2998935	0.1413784	0.9248549	0.483539	0.05224664	0.2303864	0.2384027	0.1193267	0.3014069	0.1987069	0.1618826	0.1013936	0.07099581	0.07595696	0.3283556	0.3143103	0.1387767	0.1098332	0.6598256	0.0217895	0.497718	0.2070797	0	0.02189037	0.1426341	0.5220731	0.1881919	0.04837157	0.1072182	0.8074235	1.009493	0.1468993	0.1898231	0.121239
TCGA-CA-6716	1.01643835616438	0	0.09922179	0	3.976796	0	0.1508494	1.621681	0.2086726	0.08129014	0.04056362	0.02963579	0.06636474	0.08228148	0.189483	0.4992555	0.08405833	0.3464272	0.4435627	0	0.09246096	0.1133963	0.06385251	0.3665564	0.4253175	0.09624938	0.1808546	0.07294142	0	0.09839494	0.1803772	0.003536206	0.05877249	0.4468631	0.02331941	0.5736385	0.07387316	0	0.02342737	0.06105956	0.3809519	0	0.1035358	0.61963	0.1505655	0.3730435	0	0	0.0296575
TCGA-AA-A01G	1	0	0.12646669	0	1.17947755	0.02564533	0.20974964	1.18979864	0	0.07770845	0	0	0.06767005	0.10487482	0.21309916	0.19999384	0.04285582	0.12615748	0.18845292	0.28507409	0.05892472	0.21680004	0.16277101	0.22425966	0.44353934	0.17174934	0.05532353	0.17819271	0	0.25082561	0.13670099	0.08112958	0.2696781	0.84380066	0	0.10445022	0	0.14869859	0.05972038	0.15565131	0.51792633	0	0	0.1170032	0.28369113	0.50635108	0	0	0.09450258
TCGA-D5-6535	1.26027397260274	0	0.1152645	0	1.034179	0.163616	0.3292379	1.18953	0.06926056	0.1534546	0.1413665	0.1377099	0.09251394	0.6690964	0.2524902	0.3231305	0.01952987	0.4599308	1.064913	0.1948671	0.07160704	0.1646636	0.02119329	0.2725269	0.1572089	0.2683476	0.1344615	0.07414312	0	0.5062033	0.1642353	0.1643184	0.3140657	0.390938	0.2438083	0.09519822	0.02860579	0.06776358	0.06350221	0.07093201	1.460403	0.1169849	0.120276	0.1066393	0.8669442	0.664109	0.09131635	0	0.1679569
TCGA-CK-6748	0.167123287671233	0	0.08499378	0.03985915	1.550251	0	0.2584364	1.531928	0.4341067	0.1044502	0.2606022	0	0.07958762	0.1762066	0.276885	0.1405183	0.1872122	0.8478597	0.848572	0	0.03300101	0.1457036	0.007813759	0.8415031	0.08280197	0.2761995	0.1797081	0.0390512	0.06963346	0.07224471	0.2589117	0.03937867	0.03020685	0.3733333	0.03995099	0.2456905	0.2531202	0.1499026	0.02006798	0.0784558	0.7396699	0.2156559	0.04434458	0.01965843	0.5775839	0.8217015	0.06733488	0.04746003	0.01587796
TCGA-D5-5539	1.63287671232877	0	0.1037544	0.09731447	2.0088	0.02103966	1.434004	1.840188	0.4675824	0.2656363	0.2544998	0.0309896	0.2012495	0.731342	0.2331046	0.2088249	0.05273895	0.8797561	0.7575814	0.1169387	0.04834236	0.2075088	0.07630788	1.264894	0.1617261	0.2566478	0.1815517	0.06356125	0	0.1763825	0.1427373	0.07395492	0.159789	0.8768647	0.2926161	0.3427676	0.2059941	0.1219936	0.114322	0.223471	0.6373671	0.1579545	0	0.3359666	0.6708467	0.2938301	0.1643953	0.09655975	0.03488884
TCGA-A6-4105	1.21095890410959	1	0.118704521	0	3.188123171	0.060178237	0.131250528	2.43581678	0.035663803	0.389007588	0.072792753	0	0.349341569	0.295313687	0.260025653	0.290110839	0.140789084	1.420971484	0.884431058	0.200682782	0.940237412	0.678311551	0.043651595	0.56132062	0.138772048	0.385747361	0.302912896	0.134531791	0	0.403595373	0.495745761	0.143839022	0.323438801	0.983413092	0.47427106	0.245098405	0.23567613	0.418715661	0.065397398	0.146097873	1.610330346	0.301190577	0.061932794	0.302010143	1.065115861	0.562212798	0.04702082	0.441892744	0.146358762
TCGA-G4-6307	4.58630136986301	0	0.02698051	0.09489696	2.412788	0.3214328	0.2113108	1.515225	0.04053037	0.0690766	0	0	0.07218392	0.279676	0.2803536	0.9018221	0.02285724	0.3027886	0.08040941	0.1140336	0.1414243	0	0.08681426	0.3189583	0.1708508	0.0425299	0.1131099	0.08677515	0.1105226	0.1242228	0.08948016	0.05288632	0.1038797	0.7538217	0.2694943	0.3063981	0.0502192	0.1189631	0.1327166	0.06226271	0.2503399	0.034229	0.07038394	0.1248078	0.2047098	0.4544969	0	0.0125548	0.03024189
TCGA-AA-3970	3.0027397260274	0	0.5550747	0.1301554	2.260773	0.2532597	0.1917941	1.538667	0.1667677	0.852675	0	0.331582	0.07425262	0.5753823	0.3897138	0.3790468	0.1410738	1.522723	0.3308553	0.6256091	0.5603571	0.6343711	0.3827239	0.3691116	0.05407605	0.34999	0.1821153	0.2040275	0.68214	0.4324957	0.2863608	0.2176079	0.2959109	0.6326853	0.6522767	0.3438317	0	0	0.196589	0	0.674865	0	0	0.5135385	1.153593	0.4065411	0	0	0.09332575
TCGA-CK-5914	1.83287671232877	0	0.08521624	0	3.040431	0.009600239	0.01744867	1.958837	0.3129197	0.1939325	0.3677334	0	0.04433107	0.1177785	0.1967732	0.5376811	0.08021463	0.3778128	0.4373894	0	0.1691133	0.243475	0.008704679	0.2448565	0.1291402	0.1882889	0.1380678	0.06670581	0	0.281687	0.06978209	0.02362155	0.100953	0.5317209	0.06675927	0.2346034	0.0234984	0.1669944	0.05216426	0.116535	0.2060016	0	0	0.02189987	0.3748192	1.539522	0	0.1233666	0.05660273
TCGA-A6-5666	0.991780821917808	0	0.08130721	0	1.24784	0.3650858	0.187293	1.407776	0.1744863	0.08326642	0	0.03469289	0.07768932	0.2889664	0.09133629	0.1586362	0	0.3476075	0.3115518	0.1963694	0.1352983	0.06637323	0.02135669	0.1716425	0.04526312	0.4901299	0.05928045	0.01423138	0	0.08227515	0.02282779	0.01241889	0.09632213	0.7749875	0.1364933	0.2877965	0.1441317	0.273144	0.03656673	0.1072183	0.2824402	0.05894339	0	0.2149228	0.1149511	0.4253574	0.04601018	0.06485924	0.01735915
TCGA-4N-A93T	0.4	0	0.7194864	0.1007207	1.343817	0.01088805	0.1038938	1.061833	0.9033712	0.2089499	0	0.03207431	0.2298413	0.2226296	0.6212542	0.5094593	0.05458493	2.035346	0.2400301	0.06051589	0.1250861	0.1534086	0.1184682	1.150481	1.569251	0.4791776	0.03914716	0.1052577	0.08797892	0.2586214	0.09497146	0.1186424	0.4579808	1.176241	0.05047638	0.7982217	0.0533011	0.06313185	0.3380671	0.1321674	0.3848112	0	0.5042475	0.02483759	0.3825888	0.4876323	0	0.01998791	0.05617115
TCGA-CM-6171	0.498630136986301	0	0.1513406	0.2027814	1.786659	0	0.1095652	0.9884701	0.1948673	0.1328463	0	0.09686302	0.04338193	0.2241106	0.2428687	0.2175721	0.03663203	0.4852624	0.596013	0.1218369	0.2098637	0.1235433	0.2484507	0.1038328	0.06318763	0.1835085	0.07093364	0.02317828	0	0.3369129	0.2230742	0.115579	0.1664822	0.6371118	0.07621826	0.133922	0.02682784	0	0.02552371	0.06652332	0.2628589	0.3291415	0.1692006	0.4500506	0.3708697	0.3219726	0	0.1408461	0.1332842
TCGA-G4-6309	4.31232876712329	0	0.079855661	0	2.262577064	0.067472477	0.067448097	1.514063334	0.159946538	0.081779894	0.108821342	0.238514712	0.044509713	0.165554419	0.067279274	0.239173051	0.067651806	0.597453112	0.118996018	0.075002555	0.299724712	0.190132526	0.244713157	0.236009487	0.077796346	0.077463409	0.106740591	0.122301463	0	0.188548089	0.071931641	0.033203437	0.268040488	0.525406285	0.187679203	0.329768317	0.033030322	0	0.052374469	0.040951621	0.54506248	0	0.208319116	0.092350084	0.702481883	0.123472372	0.105440485	0.049545483	0.034808878
TCGA-AA-3697	7.08767123287671	0	0.04460318	0.06972451	2.097485	0.1055224	0.02739852	2.258705	0.04466887	0.2892937	0.09117283	0.08881453	0.06961021	0.06164667	0.1920688	0.7694755	0.05038233	0.3707844	0.4652545	0.2513549	0.1500922	0.1274377	0.05467357	0.3844823	0.2027804	0.1081675	0.2709986	0.1275142	0.1218079	0.5055027	0.2556733	0.1324693	0.1937467	0.6447949	0.03494258	0	0.110694	0.2622204	0.1404174	0	0.2093048	0	0	0.03438794	0.7651205	1.451899	0	0.08302051	0.1388744
TCGA-G4-6586	2.98356164383562	0	0.041105584	0.096385507	2.972304795	0.156291111	0.231984764	2.051990739	0.216122141	0.252576478	0.210058594	0	0.041240356	0.213047233	0.144299612	0.84209959	0.087059168	0.563819865	0.107192793	0.173733544	0.039900738	0.645944887	0	0.068335614	0.040045554	0.014952816	0.097401723	0.084988572	0	0.349397462	0.030294578	0.062261602	0.024348255	0.354254172	0.289822779	0.212184693	0.025503464	0	0.032351617	0.379436157	1.433537892	0.208595499	0.053615979	0.071305604	1.098364595	0.592085694	0.081413001	0.248658777	0.111346444
TCGA-AA-3544	1.16712328767123	0	0.2123723	0	4.512911	0	0.03669033	2.287249	0.07975689	0.2718621	0.05426346	0	0.2130686	0.330213	0.2534785	0.3243953	0.08995835	0.6620407	1.780111	0.598397	0.06184423	0.9101669	0.04881021	0.5099704	0.1034478	0.2188858	0.3096779	0.04065685	0	0.4136835	0.1956464	0.1040713	0.220142	1.018449	0.2495619	0.6577522	0	0.3121322	0.1462517	0.08168164	1.189098	0.1347138	0.1385037	0.1842004	2.066715	0.531439	0	0.2470572	0.02975546
TCGA-A6-A567	5.15342465753425	1	0.1418246	0.1108514	2.944009	0.2636302	0.04355949	3.159852	0	0.169449	0.144951	0.2118024	0.04742986	0.1960177	0.2920837	0.6796386	0.4005013	0.1178982	0.2465614	0.1332054	0.03671135	0	0.3476907	1.205072	0.5987246	0.8254555	0.1034032	0.3185729	0	0.1339454	0.197434	0.1010909	0.1120101	0.8017012	0.05555341	0.3904482	0.1759867	0	0.09301767	0.2909222	1.81507	0.1199511	0	0.1640148	0.3430944	0.9925684	0	0	0.1501366
TCGA-CM-6676	0.419178082191781	0	0.09286403	0	1.157218	0.02092364	0.232929	1.490777	0.06200053	0.2113371	0.04218272	0.03081871	0.1104219	0	0.278183	0.1928396	0.06993083	1.13223	0.784155	0.0581469	0.2003158	0.02948064	0.1422883	0.8538602	0.2613556	0.3903557	0.1805505	0.1327426	0.08453486	0.1461749	0.5272434	0.1103206	0.09778945	0.2352184	0.3152527	0.1704387	0.2560727	0.1819814	0.05684578	0.03174839	0.3697472	0	0	0.3102487	0.2859203	0.3879337	0	0.03841091	0.3431093
TCGA-AA-3672	0	0	0.06256454	0	1.03405274	0.25374086	0.20176639	0.60061954	0.18797003	0.38443269	0.25577486	0	0	0	0.31626786	0.26983436	0	0.31205783	0.83906857	0	0.24292283	1.43004653	0.05751764	0.32358623	0	0.21241597	0.22807658	0.07665565	0	0	0.30739801	0	0.07411827	0.24350547	0.29408215	0	0	0	0.09848121	0	0.72063041	0	1.30569466	0.43412127	2.39412544	0.24438804	0	0.23290448	0.02337576
TCGA-AA-3553	2	0	0.04148998	0	4.236877	0.02103369	0.3249487	2.354972	0.06232663	0.2336936	0.08480919	0	0.0693767	0.08601582	0.2213865	0.3429722	0.03514932	1.241656	0.6491713	0	0.1610955	0.5927141	0.01907156	0.6284358	0.04042004	0.1509265	0.1663751	0.06354322	0	0.2644987	0.2955862	0.09611412	0.0983038	0.1730163	0.09751102	0.4283379	0.3089035	0.121959	0.1469437	0	0.6637356	0.1052731	0	0.1439448	1.081262	0.5368474	0	0.07722588	0.1705193
TCGA-A6-A56B	4.68767123287671	1	0	0.1334967	2.604461	0.02886236	0.06557257	2.015408	0.08552441	0.2332172	0.1745623	0.1700471	0.03807939	0.1180306	0.2877972	0.9412506	0.1929271	1.135864	0.3393488	0	0.4863204	0.08133203	0.2093594	1.640545	0.665571	0.4003949	0.2075449	0.183107	0	0.6855613	0.9091088	0.08116153	0.4721225	0.7755472	0.06690216	0.5877639	0.07064607	0.1673518	0.02240396	0	0.4007414	0	0.8911162	0.3950413	0.2441539	0.4308768	0	0.05298455	0.09572155
TCGA-D5-6927	0.786301369863014	0	0.02725282	0	2.638224	0.01381604	0.09416625	2.089746	0	0.3070047	0.2785358	0.1627987	0.2460796	0.3389985	0.229608	0.6562571	0.2077914	1.223378	0.670073	1.535794	0.455009	0.973315	0.238017	0.3322455	0.2124002	0.1850548	0.2583077	0.08347711	0	0.5598184	0.2276319	0.1311221	0.1775706	0.4848907	0	0.6189811	0.1690868	0.3204366	0.06434694	0.1677097	0.8545144	0.4148937	0.2132829	0.0945506	1.537334	0.6986063	0.4857881	0.05072605	0.05091186
TCGA-AA-A00E	2.5013698630137	0	0.07064134	0.66256705	2.16829667	0	0.13017916	1.5767147	0	0.21703062	0	0	0.09449727	0.58580623	0.11903221	0.20311252	0.11969131	1.40937245	0.8421232	0	0.49370955	0.2018324	0.12988583	0.20877701	0.68819643	0.4454133	0.1030081	0.02163789	0	0.30022569	0.41649807	0.12588079	0.16737321	1.45325928	0	0.87515182	0	0	0.2223894	0.43471593	0.45203367	0.35847844	0.36856351	0	1.2117777	0.20695309	0	0	0.13196734
TCGA-AA-3814	0	0	0.1266683	0	2.91601	0.2996725	0.05835667	1.930425	0.1902823	0.3026813	0.1294606	0.1261119	0.2259264	0.612745	0.2608697	0.2883288	0.2861609	0.9476895	1.006685	0.3569107	0.09836442	0.4222277	0	0.5459445	0.08226785	0.2764658	0.2770586	0.1163979	0	0.2093545	0.4252784	0.1279075	0.62525	0.9860034	0.2976997	0.4359031	0.4715389	0.2482261	0.09969264	0.0649581	1.269862	0.3213972	0	0.2441452	1.002859	0.7112586	0	0.1964746	0.02366331
TCGA-A6-2674	1.43287671232877	0	0.184521566666667	0.6462391	8.63241833333333	0.292092083333333	1.384753	5.66686466666667	4.3734463	1.65037353333333	4.95026933333333	0.342259366666667	0.865855333333333	0.991381366666667	1.03308233333333	0.5565012	0.595576566666667	3.80480133333333	1.5827786	0.592868466666667	4.26878266666667	0.647990966666667	0.265662066666667	0.700807966666667	2.25164796666667	0.7578851	0.214216333333333	0.407067566666667	0.0671263	1.172768	0.16811409	1.07039716666667	0.494610666666667	1.12873063333333	0.01925628	0.676127933333333	0.9319698	0.696876633333333	0.830602533333333	0.220667833333333	2.871056	0.621165533333333	0	2.16104633333333	4.336961	9.4151232	1.60125216666667	0.113511106666667	1.213454
TCGA-A6-2676	1.22465753424658	0	0.02373462	0	4.525236	0.2406492	0.06560789	1.669018	0.1426174	0.2187588	0.04851565	0	0.1269997	0.590471	0.09331783	0.8189196	0.201074	1.065446	0.4951503	0.2675062	0.01843115	0.5425056	0.06546006	0.2455127	0.0462451	0.115118	0.3114851	0.1017809	0	0.2017443	0.2332304	0	0.1968237	0.1715568	0	0.0980134	0.05890343	0	0.05604007	0.07302959	0.4556332	0.361333	1.114495	0.1097928	1.080493	0.1738342	1.034184	0.2650654	0
TCGA-AA-A02K	1.16712328767123	1	0.2296023	0.04307022	1.67514	0.3072928	0.3511857	1.154991	0.19315	4.796752	0.05631928	0.08229377	0.03685681	0.1142411	0.5106881	0.5611422	0.09336651	0.7329309	0.862191	0.2070226	1.055524	0.1836818	0.05910267	0.156073	0.3399956	0.6726266	0.04687235	0.01687887	0	0.05204319	0.1940338	0.02291209	0.09792098	0.3523447	0.4316946	0.5688931	0.09117055	0.2159717	0.02891288	0.05651749	0.9638111	0	0.239585	0.1911791	0.351443	0.3811684	0	0	0.04803986
TCGA-F4-6570	0.515068493150685	1	0.162427	0.04760792	4.614083	0.03087889	0.1028924	2.051453	0.7624979	3.867426	0.8922906	0.6670685	0.1833295	1.136494	0.1653562	0.744314	0.3440107	3.645672	1.603507	0.2288336	0.1261329	1.218203	1.129267	0.6150577	0.5538342	0.2806558	0.24425	0.1088334	0	0.6327885	0.2344277	0.1519561	0.3247125	0.4007551	0	1.634956	0.4282975	0.4774511	0.04793853	0.6247193	1.234252	0.2060641	0	0.07044028	2.230351	0.4014995	3.297426	0.3590141	0.01137882
TCGA-DM-A1D9	11.6986301369863	0	0.07290337	0	3.317863	0.007391793	0.3358692	2.621022	0.08761289	0.2986403	0.1043146	0	0.1170278	0.06045645	0.2948251	0.4663966	0.09881918	0.5454384	0.5105898	0.04108367	0.0283066	0.1041477	0.04021349	0.5925214	0.4829587	0.1697265	0.03720729	0.07815767	0	0.05163989	0.2973025	0.04157173	0.2504624	0.4904734	0.1199378	0.391376	0.07237123	0.04285962	0.03442659	0.08972722	0.6717721	0	0	0.9105482	0.3607444	0.565987	0	0.01356961	0.06809655
TCGA-CK-4951	5.84657534246575	1	0.1969438	0	2.941164	0.03993692	0.08165963	2.495672	0.4733613	4.255647	0.4830846	0	0.06586318	0.08165963	0.1327419	0.5521089	0.03336922	2.946934	1.173894	0.5549246	0.351755	0.337618	0.07242278	0.6402636	0.3069841	0.4489532	0.3015394	0.2955932	0	0.2790037	0.2515872	0.02105689	0.1399879	0.3504086	0.277718	0.4066451	0.2932594	0.1157825	0.2170029	0.1817943	3.52868	0.09994164	0	0.3644131	1.013509	0.2981026	0.0780127	0.1099723	0.05150838
TCGA-AA-3956	2.83561643835616	0	0.2005165	0	1.893767	1.185957	0.6158591	1.732462	0.4016236	0.1368988	0	0	0.06705797	0	0.1689374	0.3603362	0	1.333508	0.6473944	0	0.02595189	0.09548404	0.09217072	0.6420014	0.325576	0.3403918	0.1218292	0.1023658	0	0.8521951	0.1970393	0.2262992	0.03959094	1.133473	0	0	0	0	0.05260463	0.2056579	0.7270924	0	0	0.386483	1.234746	0.342673	0	0.06220402	0.06243187
TCGA-A6-2683	1.29315068493151	0	0.07343306	0	0.6935345	0	0.4736333	0.4875955	0.2206236	0.07520253	0.1000691	0	0.01637196	0	0.1099878	0.1055697	0	0.3662676	0.4012267	0	0.01900818	0.279745	0.02250315	0.1989422	0.1430787	0	0.01784649	0.02999068	0	0.03467672	0.2044524	0.01744741	0.05799591	0.3130262	0	0.2021639	0	0	0	0.07531596	0.1879592	0	0.383129	0	0.3875898	0.7290578	0	0	0
TCGA-AA-3713	1.58630136986301	0	0.1246271	0.26975	2.518174	0.2235627	0.2870815	1.833744	0.2880246	0.3141666	0.01959606	0.1718027	0.1603022	0.2782482	0.2638455	0.9716416	0.08121625	0.4781631	0.7142758	0	0.290338	0.4656398	0.09694709	0.2549972	0.09339481	0.06044682	0.2446356	0.06166581	0.1570833	0.7741262	0.287324	0.2528317	0.3520691	0.762233	0.02253096	0.633421	0.07137545	0	0.1886272	0.4129656	0.2821882	0.2432447	0	0.04434665	1.208073	0.622562	0.03797451	0.1605948	0.05372767
TCGA-AA-3955	1.74794520547945	0	0.032601573	0.305780271	5.080411797	0	0	1.971743137	0	0.166935766	0.19992147	0	0	0.135177254	0.201426018	0.538994294	0	1.13826519	0.631551291	0	0.025316791	0.093147352	0.029971703	0.337233222	0.127043379	0.173937066	0.190156423	0.059916404	0	0.415670056	0.064072456	0.058095046	0.115866218	0.16314115	0	0.538519911	0	0	0	0	0.041723469	0	0	0.377024994	0.451698379	0.557145121	0	0	0.060904038
TCGA-AZ-6598	4.11780821917808	1	0.202421528	0	2.748153377	0	0.472111185	1.187202259	0.608158934	0.116605775	0.103441863	0	0.067695068	0.262283991	0.284237277	1.682388224	0.064307504	1.51444957	0.716385903	0.071294875	0.835075487	0.361467013	0.0232616	0.308471053	0.12325093	0.104314946	0.166031953	0.085254112	0	0.125459176	0.043511853	0.031562057	0.08992594	1.709328149	0.029733577	0.522444226	0.188384998	0	0.129442007	0.038927217	0.518117837	0.128401715	1.254133377	0.819325231	0.767918667	0.518892906	0.651482877	0.04709625	0.009453753
TCGA-A6-6780	0.96986301369863	0	0.052357582	0.1444004	1.849928228	0.00780494	0.156141174333333	1.27213724966667	0.264429763333333	0.810966072	0.200293238666667	0.343940703666667	0.143105249	1.900848908	0.268639017666667	0.353175508666667	0.187677046	2.344982969	0.451273227666667	0.550954675333333	0.709314825666667	0.780903916333333	0.097195998	0.207117523	0.563943536666667	0.236120763333333	0.118712598333333	0.105444571666667	0	0.785437597666667	0.200966153333333	0.737404882	0.477735867333333	0.222234505333333	0.0723665666666667	0.948126684	0.074724599	0.131758148666667	0.225373836333333	0.272568205666667	0.386684844	0.283811429333333	0.153537262333333	0.596458662	1.91262606066667	1.68774506733333	0.0914769333333333	0.244079916666667	0.108247538
TCGA-F4-6704	0.128767123287671	0	0.2985354	0	1.152471	0.5024654	0.09627565	2.317113	0.8251713	0.2690416	0.3783443	0	0.1916891	0.7426979	0.3923703	0.7896988	0.2427956	1.10188	1.663774	0.1682354	1.251871	0.6994259	0.01097814	1.451395	0.616574	0.8253376	0.5397965	0.1719134	0.04891665	0.3637157	0.5192446	0.05107021	0.2051261	0.8797397	0	0.5670965	0.6371661	0.2808126	0.03289418	0.4776567	1.214968	0.3332903	0.03115152	2.140519	1.622982	0.230311	0.7331798	0.2889474	0.03569303
TCGA-CM-6163	1.16986301369863	0	0.1817357	0.08971347	2.348749	0.02909445	0.08813315	1.538058	0.1149495	0.3722298	0.1173107	0.371398	0.1343496	0.5948988	0.2793666	0.5019118	0.04861963	1.669789	1.183019	0.1078049	0.2228323	0.5465737	0.1582822	0.9470116	0.5591026	1.136616	0.1743449	0.1845794	0.2350925	0.9485331	0.4417611	0.5215654	0.5099132	0.9626043	0.1573603	0.2764955	0.427285	0.3936276	0.3538179	0.4414634	0.4896532	0.242695	0.6487592	2.367185	1.142236	0.2942314	0.0378887	0.2670531	0.11436
TCGA-AA-3869	2.25205479452055	1	0.188369675	0.098154313	3.051559658	0	0.134995431	1.622490797	0.062882366	0.171474403	0.128348075	0	0.12599152	0.694262215	0.188093067	0.31594068	0.141850918	1.774697178	0.561393917	0.117947863	0.097519131	0.597998967	0.038483214	0.402073626	0.244682672	0.121817764	0.152598736	0.076931759	0	0.355809385	0.370206297	0.141727009	0.024795079	0.733147711	0	0.259294289	0.207771904	0.246092947	0.131781254	0.064399889	2.276822917	0.637270541	0	0.09681888	0.869960851	0.132853672	0.331628165	0.077914464	0.070379878
TCGA-AA-3538	2.16712328767123	0	0	0	1.192816	0.06470187	0.3037929	1.837838	0.1278156	0.2178383	0.3043624	0	0.02845468	0.1763959	0.2150553	0.3975434	0	0.8487704	0.3803657	0.1198712	0.08259114	0.06077505	0.01955538	0.8015439	0.1657818	0.2372915	0.2016133	0.06515524	0	0.0301343	0.4075968	0.06064764	0.02519941	0.4376003	0.09998476	0	0.3167401	0.125053	0.0669651	0.1309001	0.9800263	0	0.2219611	0.04919885	0.3929543	0.3427434	0	0	0.1271601
TCGA-DM-A1DA	0.624657534246575	1	0.04384344	0	2.889912	0	0.2322871	2.058888	3.358963	0.05986655	0.1493664	0	0.0146624	0.2120882	0.02873001	0.3046486	0.1114293	0.58315	0.163332	0.04117892	0.4596302	0.2087783	0.02015336	0.34014	0.7973058	0.04961835	0.02131061	0.004476508	0	0.06211155	0.0287221	0.005208515	0.02596998	0.3737866	0.0343474	0.2414052	0.03626952	0.04295899	0.01150214	0.04496763	0.280554	0	1.105617	0.0845055	0.2989068	0.6564973	0	0.05440427	0.0982864
TCGA-AA-3494	0.0849315068493151	0	0.1177722	0	2.317276	0.07960742	0.2712909	2.157586	0.0589728	0.12061	0.08024556	0	0.131287	0	0.2204985	0.1552036	0	0.783228	0.2632453	0	0.289611	0.05608198	0.1624078	0.4060815	0.1147351	0.2189677	0.1001779	0.2044213	0	0.1112293	0.183239	0.06995551	0.139521	0.4256361	0.1383959	0.08105776	0	0	0.1235881	0	0.4019326	0	0	0.7717949	0.246057	0.5079594	0	0.07307032	0.1540097
TCGA-CM-6168	0.495890410958904	0	0.128505546	0.417216944	2.450666657	0.07015825	0.063757181	2.647609644	0.356385608	0.52640826	0.70720641	0.177149215	0.297523559	0.573814632	0.366443296	0.362381877	0.251231133	1.725652805	1.38462794	0.111411523	0.568041849	0.310672748	0.109051747	0.861835315	0.250383298	0.594512653	0.237834534	0.118086177	0.080985886	0.756205711	0.378831378	0.433325425	0.234210054	0.873892673	0	0.326566569	0.490644419	0.232455166	0.210057142	0.456232707	0.809655634	0.250814498	0.051574132	0.365813798	1.389148914	0.458525882	0.195781414	0.220789989	0.07755956
TCGA-AA-3852	0	1	0.1831661	0	1.868912	0.02653073	9.764604	1.651635	0.3930769	0.2143769	0.5883549	0.07815496	0.03500317	0.1084956	0.1910622	0.3949882	0.04433541	0.1305131	0.6628614	0	0.6502302	1.046663	0.3608371	0.6186725	0.1529508	0.2792098	0.03815571	0.1442698	0	0.2594853	0.2699847	0.06527933	0.06199749	1.774963	0	0.2161127	0.3246949	0	0.06178222	0	1.607423	0.2655713	0.409564	3.933888	0.8459289	0.3577395	0	0.5844508	0.3226254
TCGA-AA-3851	2.75616438356164	0	0.045780554	0.107347505	3.594091375	1.04439732	0.305824023	2.730352214	0.206315897	0.515720694	0.093579488	0.136738403	0.168412397	0.474554519	0.154282482	0.26326238	0.193920949	0.68502931	1.330277882	0	0.159979247	0.457805536	0.08417515	1.014766345	0.133799899	0.166534111	0.183580347	0.119194414	0.187534798	0.324278921	0.134960013	0.122369404	0.081352203	3.130895748	0.430379398	0.189053298	0.113615972	0.403713239	0.108092974	0.140863242	2.138532006	0	0	0.264717487	1.298793712	0.201180221	0	0.127817969	0.6157736
TCGA-A6-6654	1.09315068493151	0	0.2691987	0.04855574	5.011526	0.02099577	0.1860316	2.852678	0.4354999	0.8800728	0.7407426	0.06184992	0.3116323	1.073259	0.3372966	0.312584	0.1228009	1.49763	1.851431	1.166947	0.1045233	1.272038	0.0761487	1.124555	0.2017359	0.4720505	0.6341053	0.09831444	0	0.3520291	0.2899662	0.3062727	0.3066456	0.431761	0.121669	0.6841052	0.4111289	0.2434783	0.2363158	1.019451	1.205821	0.31525	0.1080396	0.1676329	1.817071	0.4246593	0.2050655	0.4432483	0.04642142
TCGA-DM-A28E	9.99452054794521	0	0.03027814	0	0.744688	0	0.1115942	1.492107	0	0.08268728	0	0.1205806	0.02700214	0.04184783	0.1417204	0.3554854	0.01710061	0.2517009	0.1353559	0	0.01567502	0	0.08350707	0.3579422	0.2556435	0.04405663	0.05150962	0.04946338	0	0.05719204	0.01983539	0.01798492	0.1315218	0.5106599	0.1423212	0.08335681	0.02504761	0.05933468	0.007943338	0.186327	0.2066663	0.05121675	0.1053153	0.1167184	0.166471	1.222141	0	0.01878571	0.08295988
TCGA-AA-3509	5.24657534246575	0	0.147332681	0	2.522049024	0	0.155147074	1.631604208	0.252942285	0.431093904	0.086045998	0	0.056310758	0	0.20097142	0.166422298	0	0.524901624	0.219546143	0.118610367	0.065377926	0.240543153	0.116098115	0.233268487	0.410095061	0.163336007	0.10741911	0.038681939	0.344875123	0.238538627	0.217166669	0.045007288	0.074803054	1.462828865	0.148399607	0.173833817	0	0.123737616	0.049695547	0.129523236	0.646478587	0	0	1.995935449	0.48602631	0.996860801	0	0.078352104	0.039319554
TCGA-F4-6459	0.717808219178082	1	0.6010547	0	2.483525	0.06197484	0.08917398	1.92908	0.4284996	0.1043285	0.2082388	0.1521393	0.1499046	0.3379225	0.4005386	0.3148823	0.2071319	1.930867	1.184086	0.05740948	0.4667498	0.1746406	0.3746234	1.076371	0.1389452	0.5089324	0.1708332	0.1216977	0	0.1298889	0.3353587	0.07261436	0.1327553	0.2435639	0.4309679	0.6731087	0.4045203	0.1796735	0.02405351	0.1567287	1.016947	0.2584855	0	0.07068786	0.6519652	0.1840456	0	0.03792378	0.0494815
TCGA-A6-6781	0.802739726027397	0	0.188480311	0.118198566666667	4.96373521833333	0.176229605333333	0.186675871666667	3.792501828	1.10187889266667	0.789821972	1.103573269	0.112531548333333	0.453695853	0.684552507333333	0.919075030333333	0.766485132666667	0.581990408	3.30116503133333	1.82196679366667	0.383470794333333	0.860554884	0.776386245666667	0.391000535	1.68735027566667	0.559026631333333	1.275699081	0.119521806333333	0.319488902666667	0.171520426666667	0.658592796333333	0.287490909666667	0.925018154666667	0.258183461666667	0.613614948	0.242096151	1.053631059	0.788302173666667	0.40250608	0.181487649	0.519785934666667	1.48826860966667	0.604933027666667	0.480981804666667	0.408405772	2.86372551766667	4.208811086	0.396416411	0.241602275	0.290491007666667
TCGA-DM-A1D0	10.8876712328767	0	0.223119912	0	2.300681993	0	0.356561038	1.439123433	0.020948298	0.028562037	0.057009597	0.020825614	0.004663572	0.086731063	0.168399631	0.185441893	0.070883195	0.556435967	0.238969738	0	0.027072506	0.039842841	0.025640188	0.381227159	0.380390681	0.226581294	0.005083593	0.068343036	0	0.039510818	0.181567053	0.002484957	0.06608081	0.558255872	0.081934876	0.028793308	0.15573607	0.204955251	0.005487614	0.021453838	0.972650244	0	0	0.048380593	0.124206064	0.878354417	0.276192124	0.025956012	0.302192628
TCGA-AA-A02W	3.41643835616438	0	0.1222025	0.09551457	2.055802	0.4956124	0.6662076	1.676618	0.06119122	0.2920099	0.1248963	0.1216657	0.06811285	0.08444886	0.2631121	0.3660046	0	1.42221	0.5462959	0.1147758	0.4270341	0.1745749	0.1872413	0.7072783	0.7936741	0.3852603	0.04454843	0.05614708	0	0.317387	0.2301597	0.174209	0.2171542	0.2604588	0.04786732	0.4205348	0.05054603	0	0.1282372	0	0.4431181	0	0.106263	0.04710753	0.483751	0.5966803	0	0.03790952	0.1521935
TCGA-AA-3524	3.0027397260274	0	0.05837424	0	3.34233	0.1775598	0.1075731	1.597119	0	0	0.1193221	0	0.03904375	0	0.06557458	0.1678414	0	0	0.4349286	0	0.2266529	0.1667835	0	0	0	0.05662551	0.0851204	0.0178804	0	0.2480905	0.05736197	0	0	2.109682	0.5487716	0.7231788	0.1448704	0	0	0	0.4482438	0	0	0	0.3081072	1.25411	0.69369	0	0.1308609
TCGA-AA-3841	3.07945205479452	0	0.288713111	0	1.846226779	0.048788498	0.421202958	0.854590808	0.144569157	0.147835027	0.098359176	0	0.032184412	0.798068762	0.135135542	0.172943019	0	0.960024036	0.57363014	0.27116701	0.037366752	0.137482434	0.0884745	0.213319358	0	0.140032037	0.420996959	0.014739108	0	0.20450512	0.425559788	0	0	0.802636612	0.113090389	0	0	0	0.037871319	0	0.554242233	0	0	0	1.682603576	0.516891831	0	0	0.017978472
TCGA-CK-4950	3.36164383561644	0	0.186086738	0	2.245188181	0.015094113	0.106306462	1.187977734	0.111816479	0.320158869	0	0	0.184207567	0.216042164	0.188136151	0.278225245	0.025223717	0.891032438	0.67659996	0.629199356	0.225429172	0.340272892	0.061587247	0.329982133	0.159533387	0.389906135	0.325618537	0.034199725	0.304913209	0.41125169	0.204802976	0.053056177	0.255723378	0.550439397	0.104963211	0.430334998	0.036945688	0.043759878	0.105449151	0.274835797	0.51441192	0.226636982	0.077670986	0.275459008	1.173718627	0.221700657	0.058969623	0.096982431	0.022248612
TCGA-G4-6294	2.35068493150685	1	0.08358189	0	1.825452	0.01059313	0.1636529	2.374562	0.1569469	0.08559592	0	0.1248222	0.6009675	0	0.2699382	0.4130501	0.05310644	1.406996	0.7472917	0	0.04867922	0.08955203	0.08644455	1.412658	1.038188	0.1925603	0.06093891	0.1088071	0	0.2516163	0.06673265	0.0930878	0.09901688	1.051437	0.1473275	0.258867	0.02592869	0.06142185	0.1480096	0.09644065	0.9760834	0	0.2725497	0.1933187	0.4135844	1.03047	0	0.01944652	0.1210101
TCGA-A6-3807	0.912328767123288	0	0.2250814	0	4.65012	0.6194374	0.08888233	3.071397	0.6762388	0.1975758	0.6572661	0	0.1290397	0.266647	0.2889655	0.3929238	0.1634431	1.764173	0.6228905	0.1812021	0.3246049	0.1837399	0.1478034	0.7602482	0.2506023	0.5146553	0.1875487	0.03939649	0	0.4099698	0.4107597	0.03437902	0.4571091	0.6257374	0.07557046	0.2655675	0.1595989	0	0.1771474	0.3957476	0.8230259	1.63172	0	0.6693384	0.487933	1.271711	0	0	0.01201377
TCGA-AA-3846	1.41917808219178	0	0	0	2.343062	1.066778	0.07711518	2.565299	0.2155266	0.4897677	0.1955145	0	0.03198745	0.1982962	0.2686171	0.5328424	0.04051566	1.431223	0.3206923	0.2695075	0.07427615	0.2049616	0.1099163	0.2296817	0.2329554	0.1391751	0.2092103	0.05859563	0	0.4742584	0.1292364	0.2897535	0.1416401	0.8642016	0.2809957	0.3949867	0.2373764	0	0.2634769	0.07357596	0.7650699	0.2426908	0	0.2212284	0.9939179	1.015781	0	0.04450808	0.1429476
TCGA-F4-6703	2.98904109589041	0	0.2249012	0.07273854	6.596508	0.09435765	0.1071859	3.597798	0.8387964	0.7386139	0.07926169	0.06949034	0.4201545	0.9003612	0.2482864	0.507286	0.4730422	3.984169	8.748151	0.8303647	0.5179195	1.107887	0.2067591	1.52419	0.2568775	0.6657756	0.5484637	0.2541753	0.3812201	0.6811661	0.3086395	0.3869477	0.459368	0.3018382	0.03645307	0.9927928	1.21253	0.683889	0.1403837	0.5965548	3.841019	0.9445154	0	0.161435	3.346279	0.348372	2.426854	0.2598279	0.6606418
TCGA-AZ-4313	4.1972602739726	0	0.2432865	0	3.141395	0	0.7145306	1.569198	0	0.06228721	0.06216239	0	0.02034035	0	0.08540482	0.2623174	0.2061065	0	0.1812653	0.1713759	0.04723111	0.1737761	0	0.1572859	0.2962658	0.04424969	0.04434458	0.009315025	0	0	0.01494173	0	0	0.879253	0.1429448	0	0	0	0	0	0.9340737	0	0.1586651	0	0.2808968	0.9354711	0	0	0.1136228
TCGA-F4-6461	0.926027397260274	1	0.09694847	1.136637	1.559423	0.03686162	3.495005	1.422234	0.3640922	0.4219594	0.1981712	0.1809799	0.1296884	1.256192	0.3131072	0.9320786	0.1026655	1.571561	1.173792	0	0.1035175	0.3462445	0.1559739	0.8595793	0.2125088	0.3056435	0.1236977	0.1039357	0.4964229	0.8583979	0.6906878	0.4146224	0.2297037	3.011903	0	1.050929	0.1503763	0.3562228	0.6771806	0.3355909	0.6358822	0.5534745	0	5.549805	1.3992	0.3846149	0.09600722	0.1127822	0.2445019
TCGA-A6-5656	1.26575342465753	0	0.109789666666667	0.138534566666667	2.54959266666667	1.742543	0.637675	2.44278	0.35724356	0.546658166666667	1.81882373333333	0.558437373333333	0.478584916666667	0.876296666666667	0.577276966666667	0.473067666666667	0.294130896666667	3.23589056666667	0.8853003	0.189676903333333	1.0449656	0.09573359	0.424977666666667	0.371589633333333	1.36284066666667	0.962942396666667	0.1704962	0.18548758	0.1613455	0.744347683333333	0.177804723333333	1.70476932	0.342665393333333	0.459560766666667	0.23835115	0.513497733333333	0.362904276666667	0.45275027	0.19445037	0.135219066666667	0.416291466666667	0.0708657033333333	0.260684466666667	0.4076289	1.53762456666667	3.55519116666667	0.344061846666667	0.0487046066666667	0.26520141
TCGA-AA-3664	4.5013698630137	0	0.07085852	0	1.652135	0.03592231	0.53864	2.100246	0.2128886	0.2902638	0	0	0.1184847	0	0.3382948	0.7894807	0	2.473984	0.5807396	0	0.4952274	0.3036794	0.3257129	0.2617736	0.7593434	0.1546555	0.0258312	0.03255662	0	0.2509573	0.2088893	0.07576068	0.2518317	1.59562	0.1665338	0.4389212	0	0	0	0	0.4080811	0	0.1848483	0.6555618	0.7246269	0.4151787	0	0.06594497	0.09266114
TCGA-G4-6317	3	0	0.21023365	0	2.837544	0.36798265	0.380241075	1.990673	0.39604754	0.07987606	0.026430505	0.05606965	0.034038045	0.10378205	0.2038339	0.76636395	0.031806955	0.16019675	0.152285865	0.143392355	0.12436195	0.05600853	0.04217784	0.33069555	0.21374055	0.230606095	0.11922428	0.013798515	0	0.064994885	0.045083155	0.011446622	0.06868511	0.52876195	0.0940953	0.26869525	0.236033625	0.0735746	0.009849685	0.038507365	0.2583556	0.0952626	0.10010955	0.060773855	0.23336755	0.60856625	0.04957356	0.037260355	0.07090398
TCGA-D5-6929	1.11780821917808	0	0.1240006	0.06461336	3.993184	0.3213005	0.01904256	2.235318	0.3311554	0.366856	0.3942839	0.08230399	0.1935223	0.7997873	0.1160799	0.3367271	0.2567898	1.443137	2.073622	1.087004	0.2781793	0.4723834	0.2659951	0.6820559	0.3221411	0.2405719	0.2109518	0.1181668	0.4515151	0.5270027	0.2978564	0.1325793	0.2285107	0.8503288	0	0.3982747	0.6496708	0.3239978	0.03253103	0.1271801	1.269567	0.06991744	0	0.03186713	3.072478	0.5920056	0.1091527	0.1795143	0.02573884
TCGA-A6-6648	0.942465753424658	0	0.1555661	0	1.325985	0.04416469	0.1032048	1.020016	0.4486902	0.1210792	0.241673	0.07434375	0.05826844	0.07740363	0.2796078	0.2952138	0.08434681	0.6517802	0.2596329	0	0.4638914	0.3200217	0.04004478	0.216091	0.206114	0.259558	0.1678646	0.03430863	0.0509807	0.2820932	0.198729	0.1286274	0.1253202	0.5950944	0.07312324	0.1284838	0	0.03658269	0.07835923	0.09573299	0.1672385	0.315776	0.06493194	0.1295326	0.3366507	0.780854	0	0	0.06742338
TCGA-F4-6569	1.12054794520548	0	0.072789517	0.042669717	2.529625264	0.147604984	0.121562438	1.622478329	0.601397922	0.251584249	0.539357191	0	0.310369727	1.24496704	0.229972386	0.241990518	0.154163844	0.998408776	2.711662057	0.3076463	0.247295941	0.90986896	0.016729452	1.828569679	0.053184317	0.441305915	0.298520266	0.119840398	0	0.141787913	0.800211342	0.084310709	0.183241902	0.490719187	0	1.052059008	1.106453786	0.320945132	0.093093074	0.167975808	2.084364802	0.461724547	0.047471424	0.294624235	1.248627416	0.191033282	0.144165645	0.220161723	0.047593146
TCGA-AA-3966	0.167123287671233	0	0.1737901	0	6.006889	0.1174724	0.8985173	2.55819	0.2320614	0.4746075	0.7104846	0.05767558	0.2970576	0.2401977	0.314532	0.5829746	0.2617437	1.541024	1.409955	0.761732	1.109646	0.9930863	0.1952756	0.9701865	0.7524818	0.1498523	0.2111817	0.07097734	0.316405	0.355626	0.1138509	0.0550558	0.2745117	0.4294622	0.04538298	0.637934	0.6709172	0.2270457	0.09118617	0.6535696	1.482776	0.1959822	0	0	1.363192	0.3771414	0.07649014	0.2515939	2.489082
TCGA-A6-2684	1.06027397260274	0	0.0683765306666667	0.113232866666667	4.00048193	0.0658093373333333	0.162462663666667	3.84145660233333	1.99209661633333	0.357414297333333	1.61749087666667	0.301750263333333	0.344728019666667	0.588382933333333	0.311724741666667	0.501866402666667	0.146364704	2.49776189	1.51863056033333	0	1.46932302766667	0.403150112666667	0.220046377333333	0.441509441	1.0087	1.12754677066667	0.191362872	0.218221745666667	0.062402236	0.684649953	0.658936591333333	0.989942985333333	0.432072879333333	0.825010204666667	0.0888461	0.828687250666667	0.357017436666667	0.346747233333333	0.182455785	0.116287567666667	0.492169080666667	0.199341364666667	0.02375286	0.724589866666667	2.300158009	3.843374962	0.423310433333333	0.0311249036666667	0.126142746
TCGA-3L-AA1B	0.956164383561644	0	0.06645697	0.3116603	1.876409	0.6962787	0.0663369	1.664082	0.06655484	0.4310361	0	0.3308253	0.2074329	0.1377766	0.3670503	0.5573206	0.07506767	1.43638	1.171856	0.06241814	0.1720241	0.3164617	0.3054804	0.6628848	0.4316212	0.429774	0.07267988	0.1051736	0	0.5021193	0.4680158	0.371063	0.9185109	1.810586	0.1041261	0.2744377	0.2199063	0.2604653	0.2789552	0.272644	0.4819589	0.1124148	0.1155773	0.6148399	1.636922	0.5732669	0	0.04123242	0.215194
TCGA-AA-A00A	3.16986301369863	0	0	0	2.38869088	0.04508835	0.21511663	2.2305895	0.13360494	0.13662313	0.27269866	0.19923372	0.14871763	0.09219284	0.08742074	0.31965382	0	0.5545095	0.69578994	0	0.17266417	0.38116704	0.12264681	0.5585664	0.60651794	0.08627461	0.11347825	0.02043193	0	0.1574961	0.46975716	0.06339466	0.13170406	0.65522499	0	0.64273713	0.11036223	0	0.08749783	0.13682919	0.76831223	0.22566606	0	0	1.04155249	0.34741122	0	0.20692918	0.04984492
TCGA-AA-3950	2	0	0.027184493	0	7.333205763	0.082688418	0.125240212	2.948973799	0.163347174	0.417593115	0.166702502	0	0.14545932	0.563580952	0.442795871	0.039081301	0.368480835	0	1.296277357	0	0.063330452	0.69902982	0.024991602	0.522225827	0.05296692	0.50103231	0.554960057	0	0	0.115534095	0.026713086	0.087195544	0.128818503	0.256952362	0.255559289	0.11225985	0.40479099	0	0.106976014	0.167289188	0.834976648	0	0	0.125751396	0.842965455	0.331835601	0.646093581	0.354192117	0
TCGA-DM-A285	0.49041095890411	1	1.37491603	0.037928718	1.642260813	0.221407949	0.637156209	1.719777321	0.534577072	0.140804654	1.421756856	0.072469952	0.07573308	0.067069075	0.981217607	0.587173442	0.13703482	0.685777188	0.66285214	0	0.244941265	0.138646995	0.089223933	1.35649086	0.535783897	0.219672747	0.123830893	0.190754116	0.066261013	0.068745801	0.321873406	0.017294541	0.10539426	0.539623626	0.095040279	0.467582779	0.38136357	0.142642585	0.025461408	0.12442679	0.869457565	0.656676313	0.168787646	0.037412681	0.266801299	0.639740728	0.256295027	0.045161475	0.160155054
TCGA-CM-5349	0.917808219178082	0	0.149763557	0.409698007	1.966946718	0.050615914	0.172491902	1.779191059	0.037496031	0.306744635	0.127554132	0.111829303	0.692840587	1.759417399	0.11215773	0.367812542	0.084584069	2.365458628	2.306074349	0.070330952	0.203523372	0.570527837	0.114735488	0.663928265	0.218852189	0.338979806	0.209283598	0.038227935	0.204496423	0.229845459	0.214617814	0.102301801	0.295700403	1.151901767	0	0.41230453	0.154864992	0.14674239	0.353608399	0.038400912	0.814585973	0.189998543	0	0.519587851	0.666961249	0.091406671	0.049436514	0.069689246	0.35438556
TCGA-AA-A00J	1.5041095890411	0	0.04750999	0	1.640579	0	0.1860486	1.413897	0	0.04865481	0.2913438	0.1419039	0.07944293	0	0.2535087	0.324434	0.120748	1.066361	0.5309736	0	0.3504924	0.3393571	0.9827438	0.2457235	1.018266	0.6106491	0.2251546	0.06548674	0	0.2019175	0.4551896	0.02539842	0.1688508	0.2773682	0.05582971	0.1961951	0.117908	0	0	0.1461846	0.7904422	0	0.2478782	0.1648306	0.4545102	0.1739834	0.1881949	0	0.01775099
TCGA-AY-6196	0.0164383561643836	0	0.97594025	1.30766379	4.59214744	0.16963233	0.2119638	2.89770603	1.75927963	1.05656871	0.08549605	0.62463442	0.62478461	3.75754	0.54816027	2.00434724	0.47245328	7.37119525	6.98057483	0.78568197	0.54133398	1.35436606	0.65368457	4.15139442	1.43974157	0.63564399	0.8132005	0.43132289	0.34267093	2.96267577	1.20562066	2.30554558	1.71773257	3.97671998	0.13106768	1.55450518	1.55702668	1.55732582	1.40452777	1.45854807	5.94170758	0.63675419	0.14548178	0.32246811	7.22080355	0.27229954	5.08084512	1.08991868	0.23440951
TCGA-AA-3534	2.41643835616438	0	0.02392849	0.11221636	2.54240181	0.72784465	0.04409586	1.41273791	0.07189118	0.07351523	0.04891194	0.07147015	0.20806016	0	0.1478401	0.189202	0.04054328	1.31284905	0.96273272	0.13484562	0.14865357	0.47856975	0.24198074	0.58343563	0.18649136	0.18569326	0.71528903	0.16124783	0	0.16949345	0.47027085	0.06822378	0.28347337	0.17295816	0	0.59288398	0	0.42202405	0.03766521	0.07362612	0.3062366	0	0.12484428	2.04775765	0.59991474	0.26872299	0	0.1781537	0.51853822
TCGA-G4-6302	0	0	0.3673634	0	2.175459	0.04806139	0.07643367	1.450493	0.1780183	0.3640795	0.3149032	0	0.3249738	0.6387671	0.4925498	0.7240538	0.2208668	1.477682	2.666477	0	0.5797554	0.812601	0.1198394	2.495415	0.3694346	0.8449137	0.760325	0.2141618	0	0.2518217	1.34499	0.1013622	0.07019419	0.3096809	0.111405	0.636181	0.4705573	0.6966824	0.04663364	0.5834058	2.820908	0.3006826	0.185485	0.5481832	1.27442	0.1620145	0.1408245	0.1323442	0.0265658
TCGA-A6-6141	0.698630136986301	0	0.06780784	0.1271981	1.32084	0.371258	0.7310016	1.396299	1.263083	0.3194321	0.4989787	0.040506	0.1360603	0.3373853	0.1751951	0.5946446	0.02297807	0.8117046	0.7275102	0.1528486	0.126375	0.4262207	0.07480558	1.342698	0.4492026	0.131553	0.1977527	0.1080038	0.2222136	0.9029744	0.2198855	0.2899958	0.4016492	1.296943	0.2231097	0.4480259	0.2355951	0.07972795	0.2241426	0.417279	0.4512582	0.1376398	0.070756	0.6900716	1.386859	0.2781128	0	0.5048467	0.1672097
TCGA-DM-A280	0.646575342465753	1	0.1891245	0	2.469947	0.02396956	0.04901093	1.903538	0.2130784	0.04842043	0.0241617	0	0.05534218	0	0.08630889	0.152939	0.2002772	0.5306122	0.3698911	0.06661154	0.2386554	0.2026334	0	0.4366783	0.1151546	0	0.07756268	0.007241254	0	0.0167454	0.07549949	0	0.09802186	0.3680428	0.02778039	0.3416875	0.2053451	0.138982	0.018606	0	0.9530381	0.119967	0.1850131	0	0.1871672	0.3058901	0.2341105	0	0.1104092
TCGA-AA-3939	1.08219178082192	0	0.1030903	0	5.020282	0.9668557	0.130609	2.634988	0	0.3695104	0.263407	0	0.1379044	0.2137238	0.2895157	0.1111544	0.08733562	0.6427389	0.5760706	0	0.1200823	0.5890873	0.07108073	0.437975	0.0502159	0.2125042	0.1315341	0.04736581	0	0.1825557	0.2405937	0.04592597	0.2747877	1.203703	0.121143	0.6385754	0.1279223	0.6060639	0.08113587	0.1586004	0.6266906	0.1307862	0	0.2384401	0.6291441	0.4152727	0.1020894	0.04797084	0.1829569
TCGA-A6-2679	1.63013698630137	0	0	0	1.696218	0	0.03309694	1.206909	0	0.2207127	0	0	0.2883014	0.5957449	0.7666607	0.1032792	0	0	0	0	0.0557873	0	0	0.2123191	0	0	0.2618893	0.04400998	0	0.1017731	0.03529702	0	0	0.3195492	0.1688401	1.779999	0	0	0	1.547319	0.4597027	0	0	0	3.744407	2.981576	0	0	0
TCGA-AA-3502	2.91780821917808	0	0.3210491	0	0.5211474	0.02712641	2.908873	0.6420981	0.4822828	0.1095951	0	0.07990973	0.05368362	0	0.1352437	0.4423192	0	0.8006603	0.1594692	0	0.1869833	0.5350818	0.2213633	0.2767464	0.3648982	0.3763129	0.0195062	0.01638989	0	0.4169179	0.1314507	0.05721	0.06338948	1.79994	0.06287827	0.2209649	0	0.1572863	0.1052823	0.2469608	0.239679	0.135767	0	0.1856406	1.164997	0.2612654	0.4239095	0.04979776	0.0899643
TCGA-D5-6533	2.12328767123288	0	0.1276111	0	2.691193	0.09409965	0.1656838	1.506275	0.1045629	0.1900889	0	0.1039505	0.05431555	0.1443053	0.1824476	0.2835258	0.0196562	1.330854	0.6396233	0.5230069	0.03603512	0.1988745	0.03199558	1.011443	0.06781107	0.1575487	0.287579	0.02487424	0	0.279391	0.3077956	0.1157669	0.1374336	0.3999171	0.02726505	0.04790701	0.08637249	0.06820191	0.09130425	0.03569542	0.5641847	0	0	0.1073291	0.4898538	0.8043516	0	0	0.1213644
TCGA-AA-3693	0	0	0.0656846	0	2.42326	1.631668	0.0680877	1.812895	0	0.2522526	0.03356628	0	0.4942497	0.0680877	0.19369	0.661012	0.02782321	0.900955	0.5383354	0	0.08926305	0.2345879	0	1.213298	0.3199536	0.3424782	0.05986266	0.04526912	0	0.06978989	0.1048865	0.05852402	0.2334435	0.4291251	0	0.2034361	0.08150644	0.09653933	0.06462027	0	0.4623471	0	0.6854045	0.1139427	0.4116971	0.6574749	0.2601875	0.1222597	0.1411136
TCGA-AD-6548	1.78082191780822	0	0.03747494	0.2196807	4.794645	0.3609664	0.1079055	2.718432	0.1125904	0.2590512	0.6894188	0	0.08772822	0.4273057	0.3052062	0.4512046	0.1428654	0.7009372	0.6282322	0.7391466	0.7711821	0.3747494	0.05167793	0.3461105	0.1095256	0.127233	0.2254122	0.05739405	0	0.3583541	0.1749192	0.1068468	0.2330759	0.333383	0.06605606	0.8511515	0.0930035	0.1101569	0.1179767	0.1153075	0.6954258	0.3803427	0	0.4333837	0.9828082	0.6084072	0.1855555	0.08719078	0.07350854
TCGA-CM-6170	0.663013698630137	0	0.0982032	0.2302696	0.8984911	0.02987095	0.05881547	1.249145	0.1180174	0.1910821	0.100368	0.1173262	0.05911511	0.6514944	0.1930536	0.5153073	0.06655632	0.5877786	0.6877811	0.2213641	0.04575589	0.02805806	0.05416887	0.3700493	0.3252805	0.5287002	0.2076376	0.02707223	0.08045563	0.2643303	0.2846757	0.1994945	0.1512398	0.5842408	0	0.3649819	0.1462296	0.1154666	0.1004764	0.09064911	0.653538	0.1495034	0	0.340705	0.8617235	0.5034736	0.03889991	0.07311479	0.06604435
TCGA-AA-3684	0	0	0.229636253	0.61537991	1.549133453	0.066523425	0.060453988	1.91319804	0.098560479	0.134382661	0.603510107	0.097983258	0.263301896	0.272042948	0.294813062	0.660264914	0.055583526	0.490874561	1.319875281	0	0.331173714	0.374916331	0.090476654	0.799871297	0.383510402	0.350046703	0.406606007	0.130629632	0	0.278844022	1.756878517	0.058457866	0.155453113	0.291840023	0.077099729	0.270941559	0.162828626	0	0.129094454	0.100939012	2.309122387	0.665896171	0	0.075875924	2.099446579	0.224249859	0.649733642	0	0.02451376
TCGA-AA-3941	2	0	0.07305646	0	4.671724	0.8888778	0.3702319	3.232018	0.1463281	0.07481686	0.04977795	0	0.04886399	0.1009723	0.1914916	0.4901322	0.08252225	0.6073153	0.4717452	0	0.05673208	0.2087327	0.08955096	0.4498225	0.4270349	0.09449053	0.0532649	0.03729609	0	0.4484855	0.1435792	0.1388634	0.08654773	1.475864	0.4006322	0.3016907	0.120872	0	0.09583024	0.07492971	0.8726443	0	0	0.2252988	0.3534685	0.8204426	0.7717032	0.135981	1.128227
TCGA-A6-5660	0.936986301369863	0	0.1340348	0	2.574369	0.05226925	0.5272536	2.063723	0.2168366	0.09502927	0.1053765	0	0.1930912	0.2992521	0.2026873	0.2964503	0.1222857	0.8228125	0.4148246	0	0.05604569	0.1178327	0.05687196	0.5104023	0.1004448	0.2150322	0.1127581	0.08842764	0	0.1606699	0.1823683	0.06981652	0.01221437	0.6305931	0.0726952	0.383195	0.2047021	0.1818428	0.06491712	0.2855178	0.5014175	0.05232126	0	0.09538842	0.5305903	0.7400365	0.5309338	0.01919083	0.04237447
TCGA-A6-6652	1.24931506849315	0	0.05303663	0	2.266579	0	0.156379	2.891981	0.03186884	0.1086292	0.02168231	0.0316822	0.02128421	0	0.1072415	0.2287415	0.07189018	0.5290696	0.3003214	0	0.08237132	0.03030665	0.11702	0.963995	0.3720162	0.4630302	0.1314732	0.09747272	0	0.07513523	0.067752	0.02646272	0.05026468	0.3538666	0.09971864	0.1752141	0.07897425	0.06236007	0.02504508	0.2611034	2.185615	0	0.05534257	0.9077562	0.3919084	0.818323	0.2521042	0	0.1466375
TCGA-CM-5868	1.16712328767123	0	0.1937943	0	2.138642	1.648818	0.2833731	2.56213	0.6581835	0.2329796	0.2411243	0	0.157798	0.1746821	0.1987682	0.3694544	0.1427634	0.9666025	0.8161187	0.09496528	0.1046895	0.2407383	0.04647692	0.7595158	0.1313369	0.4209314	0.1474372	0.03871332	0.06903098	0.09549286	0.1448952	0.05104964	0.3693278	0.6699336	0.1386187	0.2435648	0.5227711	0.1486056	0.1259975	0.1296283	0.7979705	0.171032	0	0.5651618	0.5169956	0.6829408	0.3337615	0.0470494	0.06296233
TCGA-CM-6164	1.33424657534247	0	0.09677471	0.04125818	2.819846	0.01784027	0.05674398	1.70605	0.5022075	0.1982133	0.05394983	0.2627717	0.08826546	0.1459131	0.2520134	0.4806186	0.05962561	0.8337381	0.7472583	0.1983128	0.2801065	0.2010903	0.2345525	0.6500293	0.2056998	0.2389561	0.153944	0.07275936	0	0.1495609	0.09941911	0.06584443	0.09380127	0.2592552	0.02067662	0.435967	0.1310023	0.05172135	0.09693763	0.08120955	0.6080017	0.0892901	0	0.0813937	0.5862478	0.872021	0	0.0982517	0.03287053
TCGA-AZ-6606	0.978082191780822	1	0.1254442	0.1810123	2.392285	0.6163819	0.1289222	1.801764	0.1739477	0.4743394	1.242646	0.0288215	0.02581651	0.5201344	0.1246578	0.09017129	0.06539896	0.4331682	0.1869292	0.1087574	0.3896553	0.2205612	0.05322691	0.2709284	0.3760284	0.1544479	0.05628331	0.02955719	0.1581131	0.1640424	0.05689332	0.04814661	0.0457261	1.985141	0.2721441	0.2390901	0	0	0.03037822	0.02969093	1.580735	0	0.201382	0.9373851	0.30559	0.4381793	0.2293408	0.03592169	0.04326393
TCGA-DM-A1HA	7.12328767123288	0	0.14312	0	3.759385	0	0.07829907	3.091393	0.1343726	0.7603251	0	0.05343427	0.005982886	0.1112671	0.1205802	0.578683	0.0909359	0.4015409	0.2799152	0	0.2292263	0.1789	0.4934061	1.387917	1.010862	0.1605251	0.006521731	0.09315696	0	0.1140488	0.07471403	0.02869152	0.4662621	0.4028542	0.02102282	0.4802054	0.02219927	0.1051747	0	0.3027539	0.6983162	0	0	0.04137824	0.2950809	0.5459491	0.283461	0.06659782	0.0300788
TCGA-G4-6323	1.14794520547945	0	0.067459736	1.455269343	1.329987437	0	0.130531847	1.013515076	0.567496337	0.442145741	0	0.402980562	0.126337709	3.524359875	0.356169576	0.387929138	0	0.471063586	0.36188773	0	0.146680629	0.501129469	0.707004788	1.006838395	0.44689659	0.078526597	0.24592184	0.08265337	0.994827917	2.255403846	0.18561176	0.447185924	0.847125049	3.300728219	0.221964293	0.445725868	0	0.079318652	1.932596516	0.249082103	1.10508697	0.205399794	0.070392768	0.21844105	2.314401298	0.250334071	0	0.075338246	0.312538734
TCGA-AA-3542	1.08219178082192	0	0.1189105	0	6.685621	0.1205653	0.2465218	3.196315	0.08931424	0.03044396	0	0	0.0397668	0.1232609	0.1502751	0.1923183	0.1511072	0.1482747	0.2214915	0	0.02308503	0.1698722	0	0.2196464	0.1737661	0.1009298	0.08669674	0.009105761	0	0.1263424	0.1314546	0	0	1.570241	0.2096004	0	0.07377661	0	0.02339675	0.09146964	0.5326356	0	0	0	0.3334264	0.9870314	0	0	0.07774919
TCGA-D5-6924	1.19178082191781	0	0.2323555	0.1556668	2.272843	0.03365559	0.2370332	1.748641	0.0498638	0.5099024	0.3392537	0.09914354	0.06660496	0.3440805	0.3449142	0.4414123	0.196846	1.572843	1.013994	0.1870581	0.180436	0.379356	0.1830961	0.7357665	0.09701295	0.3863911	0.7502381	0.1677625	0	0.4467312	0.3098713	0.4140507	0.2359409	0.5629078	0.2340382	0.4112249	0.411892	0.3902884	0.1175608	0.35747	1.380639	0.5053361	0.1731842	0.1535488	1.927207	0.5024333	0	0.09267569	0.1302212
TCGA-F4-6856	1.61917808219178	0	0.123178364	0	1.443801958	0.249785152	0.178353497	1.45702408	0.158605426	0.270313966	0.071939268	0	0.047078944	0.072962794	0.177907077	0.164436234	0.059630722	0.877694248	0.576880412	0.198329805	0.040994703	0.15083065	0.01617742	0.36404761	0.137144966	0.13655804	0.012829769	0.07546062	0	0.199431637	0.207501126	0.056442916	0.062539538	0.2348173	0	0.290669593	0.174684646	0	0.055397677	0.054144336	0.427889711	0.089297748	0.275429883	0.203501671	0.766250922	0.317906823	0	0.229273598	0.039448016
TCGA-QG-A5YV	3.56438356164384	0	0.04812557	0	3.261176	0.4977121	0.07981801	1.649359	0.433768	0.1084275	0.0983729	0.02874851	0.1287556	0.199545	0.1567791	0.4082025	0.08154166	0.3840632	0.2151413	0	0.06726954	0.2750032	0.1061842	0.4764797	0.4313375	0.07936256	0.224563	0.1061364	0	0.2863471	0.1466022	0.07889768	0.1026232	0.6207923	0.02262123	0.1987372	0.04777429	0.05658568	0.05302725	0	0.5296832	0.04884386	0.100436	0.8459624	0.4127717	0.4605679	0.03812666	0.08957679	0.1330593
TCGA-AA-3688	1.58356164383562	0	0.0963182	0	2.285551	0.05859517	0.1242479	1.239037	0.2893802	0.2367339	0	0	0.02576907	0.2396209	0.2596773	0.1800112	0.06527878	1.345158	0.287055	0	0.0149592	0.1651169	0.0708388	0.2561973	0.1876687	0.2055521	0.1123598	0.1003098	0	0.1364508	0.1987607	0.02059635	0.06846311	0.9746804	0.09054799	0.2386508	0.1912303	0.3397507	0.227418	0.05927274	0.5177254	0.09775579	0.1005059	0.7128857	0.5973473	0.5925713	0.07630646	0.03585568	0.05038183
TCGA-AA-3980	0.663013698630137	0	0.1338059	0	2.185187	0	0.08219334	1.327355	0.6030134	0.3882521	0.2735111	0	0.05966428	0.36987	0.2630436	0.4328183	0.1511429	1.223555	0.4652419	0.3770222	0.5022179	0.5097368	0.08200813	0.4119342	0.1303553	0.2920443	0.1463353	0.04781653	0	0.3475237	0.1972284	0.1510109	0.1320964	0.2479913	0.2096498	0.3683726	0.05534551	0.1311067	0.0351034	0.06861842	0.4566526	0	0	0.3610636	0.7798133	0.3266683	0	0.08301827	0.8748848
TCGA-AA-3525	0.00273972602739726	0	0.367916051	0	2.809671409	0.02331476	0.370782606	1.561803638	0.345429282	0.235488437	0.047003303	0	0.107660681	0.381376395	0.29705777	0.380166956	0	1.146926566	0.6510421	0.259167384	0.571411302	0.26279718	0.084559345	0.271839459	0.268821184	0.133835368	0.083826477	0.070434379	0.188390749	0.195455402	0.531006006	0.04917117	0.027241171	0.971683439	0.216171874	0.09495809	0.114134542	0.135185293	0.036195445	0.21225926	0.294286679	0.233379585	0.239945251	0.053185143	0.47030666	0.157187686	0	0.128401359	0.008591446
TCGA-AA-3994	2.25205479452055	0	0.1804171	0	5.031945	0.09146392	1.007818	1.932267	0.06775604	0.5773889	0.2304927	0.1347184	0.04525215	0.561053	0.2786728	0.3242167	0.152845	0.7873947	1.008174	0.2541787	0.4903608	0.06443466	0.08293168	0.4998879	0.1757645	0.492222	0.06577034	0.0345393	0	0.03194885	0.2216105	0.02411234	0.427469	1.040754	0	0.2793908	0.1679064	0.5303326	0	0	1.154488	0	0.2353266	3.859943	0.5654079	0.4514745	0.625329	0.1679064	0.02527821
TCGA-AY-4070	1.35890410958904	1	0.3227193	0.108103	2.993478	0.53756	0.169918	2.257191	0.7618158	0.4721367	0.1413572	0	0.07708986	0.4778944	0.6862101	0.5468002	0.2343429	0.8048256	3.984571	0.3897084	1.038233	0.1975832	0.1483433	0.9537811	0.3593109	0.4024948	0.3025185	0.1835804	0.3777093	0.8490591	1.359099	0.1725229	0.5188568	1.986603	0.6501126	0.6663435	0.3432468	0	0.1088537	0.4964912	1.268549	0.4679086	0	0.1599483	1.703357	0.8441505	0	0.1287176	0.03445041
TCGA-AA-3495	3.08767123287671	0	0.0811789	0.1269004	2.411878	0.3841069	0.07479899	1.993754	0.08129846	0.2216934	0	0	0.05429671	0.1121985	0.1215895	0.4279198	0.1833942	0.9447716	0.5241939	0.1524908	0.546343	0.2319397	0.02487682	0.279907	0.2108946	0.1706185	0.09864484	0.03315415	0.2216934	0.3450103	0.1196568	0.1350145	0.1923403	1.293906	0.3815783	0.2234885	0	0	0.04259387	0	0.692618	0	0	1.063977	1.69604	0.3567364	0.1071877	0.05036647	0.06066116
TCGA-D5-6531	1.47945205479452	0	0.06545274	0	1.918886463	0.09954542	0.070360217	1.722716117	0.196647407	0.178746439	0.423672045	0	0.043778226	0.407084115	0.116416492	0.13330403	0.184833319	0.707337679	0.568946389	0.122949898	0.220252083	0.187007829	0.050144055	0.249863049	0.233804439	0.476189692	0.151116762	0.036755743	0	0.216357668	0.209032595	0.06220526	0.116309747	0.242615771	0.05127634	0.315339112	0.243656185	0.256529471	0.025756865	0.100696523	0.349026531	0.055358039	0.056915426	0.756936449	0.66214803	0.527319107	0	0.507617053	0.057061363
TCGA-CA-5254	0.186301369863014	0	0.042185706	0.039567283	2.007043542	0.05132734	0.066079507	1.285820311	0.27883571	0.164168469	0.206955126	0.252002459	0.073361634	0.104949805	0.123211995	0.121295052	0.100068418	1.009981493	0.942938346	0.475463203	0.288282371	0.216955058	0.193913564	0.411436684	0.263026062	0.196425312	0.061514539	0.041349593	0.069123566	0.239052333	0.203125392	0.069159794	0.309851804	0.942917786	0.118975354	0.139366542	0.46065559	0.14880491	0.013280685	0.077881303	1.544092106	0.042815343	0.176079467	0.097572381	1.046511117	0.140067044	0.066841817	0.109929175	0.018914031
TCGA-QL-A97D	1.82465753424658	0	0.05630432	0.1056191	1.522172	0.05708787	0.2127052	1.516163	0.1353294	0.1614509	0	0.1009026	0.09791413	0.4202225	0.3099218	0.7851655	0.01907987	0.6178332	0.3859457	0	0.06995709	0.2895651	0.08281987	0.2828879	0.3071731	0.1201587	0.3776695	0.03794201	0.276773	0.7657387	0.0885247	0.2688915	0.1600847	0.8828222	0.1323281	0.930047	0.02794667	0.06620219	0.2038425	0.06929762	0.2882329	0.1142894	0.352514	0	0.9658412	0.8467479	0.04460614	0.2096	0.1009765
TCGA-AA-A02R	1.83561643835616	1	0.042704564	0	3.629887916	0	0.029511284	1.583485223	1.090570155	0.37173551	0.741981097	0	0.128533736	1.150940071	0.179895326	0.230225449	0.036178285	0.852003032	0.795446585	0	0.364785082	0.610065196	0.255188155	0.26819889	0.1664132	0.455677798	0.217948953	0.032701693	0	0.423486924	0.629460332	0.045658968	0.101181545	0.118720782	0	0.617227905	0.052991064	0.125529265	0.033610073	0.065699329	0.737819125	0.216709726	1.114032097	0.04938623	1.803204347	0.375325893	0.253739738	0.317946387	0.007977776
TCGA-CK-6751	1.41917808219178	0	0.033740072	0	2.682023321	0.022806411	0.274614317	1.638417899	0.202738577	0.115176953	0.09195691	0	0.112835651	0.13989786	0.170558294	0.299119173	0.076223419	0.785343487	0.921752151	0.063379141	0.235808041	0.385600824	0.020678909	0.390558748	0.197219905	0.152736798	0.081998746	0.051673984	0	0.111529683	0.182352413	0.0440908	0.066618028	0.356436411	0.079296944	0.139331472	0.139557476	0	0.061960935	0.103815606	0.806036351	0.114145517	0.058678386	0.026012754	0.593615757	0.389892456	0.22274999	0.167468971	0.012606181
TCGA-F4-6805	1.35890410958904	0	0.185973588	0.249186286	3.457946408	0.121218229	0.642591667	2.795980062	0.319281397	0.340097999	0.488759674	0	0.2132381	0.77111	0.156684796	0.32465338	0.247582304	1.523905128	1.247069058	0.07485914	0.237258164	0.455445522	0.036636785	0.834268645	0.103530119	0.405905264	0.377720277	0.142412207	0	0.338737607	0.372023962	0.099419843	0.188843265	0.531787576	0.093660168	0.60341922	0.296704474	0.312380502	0.115003509	0.163493264	1.581058845	0.202231407	0	0.245795996	1.279578025	0.259444793	0.368336039	0.098901491	0.134006086
TCGA-AA-3696	0.419178082191781	1	0	0	2.04094801	0	0.9439615	1.84405656	0	0.78687152	0.26176488	0	0.0856529	0	0.28771073	0.09205121	0	0.6387319	0	0	0.19888949	0	0.35318794	0.37847352	0.24951418	0.24844636	0	0.62760684	0	0.3628352	0.69211339	0.04563965	0	0.21360699	0	0	0	0	0.20157511	0	0.32778086	0.64985409	0	1.18476801	0.67591551	0.18758354	0	0	0.239232
TCGA-A6-5662	1.24109589041096	0	0.2142772	0	1.240739	1.158716	0.1786334	1.405658	0.03065611	0.1567432	0.1460005	0.03047657	0.525506	0.04230792	0.1547408	0.7627948	0.1728862	0.3562555	0.4105321	0	0.05546573	0.2332269	0.009380576	0.5805119	0.1789298	0.7670951	0.0371971	0.062509	0	0.01445521	0.1153074	0.0727306	0.07252786	0.1475069	0.1918479	0.4213663	0.1772609	0.2399481	0.08833737	0.2825633	0.7835193	0.1553395	0.1064731	1.085615	0.269282	0.7622717	0.04041844	0.03798448	0.04574835
TCGA-AZ-6601	8.33424657534247	1	0.165697136	0.437097619	2.255681721	0	0.028626538	1.297408579	0.995647006	0.593914435	0.169349779	0	0.283994027	1.459953428	0.168685342	0.431758395	0.228108807	2.376072629	1.157398735	0.350161076	0.313638756	0.562186713	0.218975598	0.428496036	0.504450451	0.135618733	0.302021228	0.079303247	0.339379677	0.674870629	0.183176748	0.32848502	0.331249937	0.927050414	0.267730684	0.727021343	0.539725162	0.365297722	0.268970178	0.191189004	1.073549045	0.42042557	0.054031675	0.119764087	1.981452659	0.444978906	0.12306632	0.212034885	0.034823711
TCGA-AA-3556	1.91780821917808	0	0.04492436	0	1.020937	0.06832433	0.52777	1.266867	0.1349716	0.2990447	0	0	0.1201911	0.09313588	0.239712	0.3713621	0.03805885	0.5601815	0.4686048	0.1265825	0.06977214	0.1283553	0.1032511	0.1991576	0.1750634	0.3704177	0.04913101	0.03440154	0.1840275	0.06364285	0.1876176	0.03202156	0.07983075	0.2747623	0	0.6493117	0	0.1320543	0.05303571	0.2073432	0.2874708	0.1139872	0	0.6753935	0.311216	0.2741913	0	0.04180917	0.04196232
TCGA-DM-A1D4	7.72876712328767	1	0.02577829	0	1.607861	0.2962198	0.3562854	1.387903	0.8519366	0.1759964	0.01756437	0	0.05747292	0	0.246143	0.2223582	0.07279585	0.771458	0.1920662	0.1936933	0.02001817	0.1473045	0.04739768	0.4761655	0.6864363	0.04167675	0.04385443	0	0.1407971	0.292154	0.008443757	0.03981134	0.07125707	0.8504238	0.2221447	0.2838743	0.02132511	0	0.1623078	0.1321964	0.7258029	0	0.1344954	0.07949769	0.2721227	0.3230616	0	0.03198766	0.05457822
TCGA-RU-A8FL	3.22465753424658	0	0.08605381	0	2.603277	0	0.227961	2.579033	0	0.1542229	0	0.1606422	0.02158399	0	0.1631279	0.5335154	0	0.2146085	0.04808704	0.06061801	0.2171819	0.06146701	0.1186682	0.2066413	0.6916359	0.2086897	0	0.006589706	0	0.0152387	0.05813606	0.04600361	0.03822948	0.2631572	0.1264039	0.3553639	0.02669552	0.1264768	0.008465942	0	0.1927303	0	0	1.51765	0.08516321	0.7458134	0.04260917	0.02002164	0.1406649
TCGA-AA-3975	2.83835616438356	0	0.2248558	0	0.9585866	0.02533167	0.149633	1.451069	0.1501246	0.230274	0.05106945	0.07462271	0.1169742	0.4143684	0.3367884	0.5387665	0.04233166	1.246145	0.6701327	0	0.03880268	0.1427656	0.1607802	0.4245738	0.1947175	0.206002	0.2003719	0.1147912	0	0.3893336	0.773348	0.1068497	0.1775865	1.125198	0.1761543	0.2063454	0.1860121	0.1468799	0.07865326	0.3843689	0.8952853	0	0	0.1155721	0.6758279	0.8417292	0	0.09300605	0.009334673
TCGA-F4-6460	1.11506849315068	0	0.1418531	0.2217474	1.332746	0.1078704	0.1198127	1.202915	0.1775776	0.4600257	0.1691435	0.07061503	0.1660379	0.5881715	0.4182949	1.419031	0.1602328	1.179219	1.14498	0.06661611	0.1193359	0.303971	0.1630128	0.5065816	0.3915526	0.4472117	0.1896107	0.09052189	0.193695	0.4019172	0.5924213	0.1811576	0.2800817	0.9398881	0.05556459	0.4881585	0.1760221	0.3474788	0.1674655	0.181863	0.5597592	0.4799011	0	0.5194848	0.8969045	0.9465929	0.0468253	0.0660083	0.05741674
TCGA-AZ-4308	5.61095890410959	0	0.0714613	0	1.940373	0.09660772	0.01097418	1.257719	0	0.1219721	0.04869107	0	0.3505118	1.086444	0.1471725	0.3082052	0	0	0.567932	0	0.07399114	0.06805838	0	0.4928009	0.09282461	0.2772821	0.1910402	0.02188905	0	0.3374561	1.182072	0.01697893	0.253974	1.364173	0	0	1.004979	0.1400394	0	0.5863491	2.012035	0	0	0.1101898	0.5657738	1.325917	0.28307	0	0
TCGA-AA-3972	4.24931506849315	0	0.1736147	0	2.3717	0.07544176	0.1371173	3.244114	0.07451587	0.1269987	0.05069767	0.1481589	0.1327115	0	0.1393069	0.249594	0.08404697	0.7422436	0.2217514	0	0	0	0.02280139	0.7146884	0.67655	0.2405909	0.1446641	0.01519408	0	0.0702726	0.207162	0.02651796	0.2644405	1.103217	0.1165813	0.2048432	0.1846579	0	0.01952017	0.07631414	0.5078672	0	0	0	0.2127269	0.3996355	0	0.04616448	0.07413374
TCGA-AA-3858	2.58904109589041	0	0.369026034	0.108162803	3.267418011	0.046770198	0.106257496	1.704900278	0.13858857	0.212579003	0.141435329	0	0.185117978	0.478158733	0.233181373	0.265261843	0.039078754	1.150386781	0.653006258	0.129974639	0.519403792	0.32948753	0.042407228	0.391948151	0.0449387	0.234918499	0.235422256	0.120099689	0.188959114	0.163370901	0.203977541	0.024659759	0.054646712	0.320597025	0	0.476222868	0.228957758	0	0.072609289	0	0.708418861	0	0.361003729	0.160036801	0.547810316	0.382893216	0	0.257577478	0.034469465
TCGA-AA-3679	1.25205479452055	0	0.09391072	0	4.600973	0.03173921	0.0432651	2.637013	0.1880981	0.06411575	0.1279745	0	0.02093747	0.1297953	0.2461536	0.5400363	0.05303928	0.7806759	0.6530534	0	0.3403236	0	0	0.4163228	0.1219853	0.1214632	0.4108174	0.04794241	0	0.1773869	0.1691841	0.02231282	0.2595906	1.496838	0.1471412	0.1292698	0.0776877	0.1840325	0	0	0.4006229	0	0.489969	0.2172085	0.5163267	0.6419555	0	0.05826577	0.08187088
TCGA-AY-5543	1.31232876712329	0	0.076125281	0.039666813	1.697546783	0.463108073	0.210427607	1.956927232	0.076237395	0.303176321	0.121027501	0	0.079203571	0.070142536	0.299303144	0.212800293	0.014331448	0.4218842	0.226874469	0	0.032841766	0.193334048	0.023328162	0.206235822	0.214246255	0.143587074	0.123338554	0.031090205	0.069297445	0.287584396	0.016623375	0.066319253	0.260529418	0.333908293	0.039758211	0.593797741	0	0.099452817	0.113169786	0.052051474	0.541250432	0.042923044	0.176522391	0.078254257	0.502249592	0.954025785	0	0.094462028	0.069525898
TCGA-AU-6004	2.25753424657534	0	0.067493365	0.40695507	1.906620614	0.009776091	0.146588378	1.809593544	0.405556599	0.385095536	0.098544564	0.17279205	0.13542931	0.439765133	0.151637076	0.42970708	0.147031109	0.913741824	0.660918022	0.271678108	0.351909504	0.523417935	0.168418389	0.484435228	0.469663206	0.205767423	0.126537138	0.115181728	0	0.61467172	0.478472784	0.192433914	0.251294362	1.308083072	0.271928503	0.278717541	0.239288261	0.170053271	0.341484289	0.237339307	1.542463539	0.244645461	0.603667367	0.089204059	0.922405169	0.442540099	0.305545554	0.179466196	0.079254376
TCGA-DM-A28A	2.20547945205479	1	0.2325145	0	5.692815	0.02050003	1.397224	2.215156	0.2126086	0.1759998	0.6405951	0.1207791	0.04733154	0.2095836	0.1873788	0.3924044	0.1712876	0.4033844	0.6327007	0	0.09420493	0.02888379	0.1022322	0.5826137	0.3348534	0.3040009	0.140042	0.06812412	0	0.157537	0.2731856	0.04323486	0.1317383	1.551364	0.095037	0.2922292	0.1254442	0.1188647	0.02386925	0.06221125	0.4140131	0.05130107	0.05274432	0.07014636	0.3068109	1.016837	0	0.0564499	0.07176512
TCGA-AA-3848	0.838356164383562	1	0.10138203	0	1.1968712	0	0.38922641	1.32202169	0.60918805	0.17304162	0	0	0.02260321	0	0.1138873	0.38866684	0	0.50567077	0.40286213	0	0.23618501	0.19310863	0.3106795	0.22472221	0.19753519	0.13112655	0.1478337	0.07245923	0	0.0957497	0.54793179	0.03613196	0.08006943	0.82675126	0.07942371	0.13955421	0	0.39734744	0.05319428	0	0.0864991	0	0.35263315	0	0.89184711	0.5280213	0.13386365	0	0
TCGA-AA-3667	1.16712328767123	0	0.11642341	0	1.69514643	0.47217447	0.07151574	0.95932891	0.34978462	0.19871466	0.07932657	0	0.07787009	0	0.23977068	0.19526971	0.19726226	0.38712919	0.17348704	0.21869591	0.09040874	0.44351776	0.0356773	0.37275732	0.07561406	0.13175831	0.11317787	0.0475483	0	0.10995544	0.13347193	0.01383087	0.0919488	0.60417055	0	0	0.09631134	0	0.03054318	0.11940863	0.54632818	0.19693512	0.2024755	0.35903819	0.81933164	0.70110412	0.15372412	0	0.05799848
TCGA-AA-3811	0.838356164383562	1	0.09835645	0	2.264247	0.04986261	0.1812531	1.947458	0.147752	0.2518162	0.05026231	0.1468866	0.1151254	0.2039097	0.7734197	1.078178	0	1.349095	0.8427474	0.277137	0.9738299	0.6322915	0.2486614	0.4178635	0.3353701	0.4651236	0.3226991	0.0903816	0	0.243842	0.2174644	0.08763415	0.3204295	0.5058561	0	0.4061683	0.1830722	0	0.2902881	0.6809293	0.4090987	0	0	0.1137456	1.443855	0.7203704	0	0.4576806	0.009187141
TCGA-G4-6303	5.48767123287671	1	0.05853405	0.07842986	1.786798	0.05934864	0.3813891	1.432913	0.2512297	0.222651	0.6153364	0.04995167	0.05033654	0.03467174	0.3569509	0.4087306	0.1275137	0.4587859	0.8348569	0	0.1753252	0.07167434	0.0999371	0.4324863	0.9449786	0.2595681	0.2072869	0.08452407	0.06850801	0.2369235	0.2177505	0.104306	0.1783118	0.311507	0.07861057	0.5870332	0.1037621	0.04915992	0.09213693	0.02572925	0.3745591	0.08486813	0.08725572	0.1740663	0.4468752	0.5226154	0	0.1089502	0.01562133
TCGA-QG-A5Z2	2.60821917808219	0	0.02513824	2.318497	1.3602	0.4163053	0.3937644	0.8607335	0.3272785	0.3432531	0.01712826	0.1251391	0.08967347	1.563476	0.320042	0.933605	0.04259304	0.9612766	0.2622163	0.2361051	0.4229579	0.4548825	0.2388077	0.235267	1.044906	0.2438517	0.2321559	0.1488667	0.4119038	1.41263	0.2017356	0.4210788	0.7147319	1.975432	0.2166291	0.3806358	0	0.09852453	0.7386299	0.2062625	0.3217191	0.1275672	0.08743737	0.1938096	2.128458	0.2536688	0	0.2183541	0.05948464
TCGA-CA-5256	0.178082191780822	0	0.02075465	0	4.37361	0	0.06693234	2.221578	0	0.1275286	0.04242433	0	0	0.3442234	0.1282308	0.2237816	0.03516568	0.6211171	0.4639096	0.3508797	0.04835114	0.415093	0	0.3066967	0	0.1811961	0	0.03814368	0.3400762	0.4998411	0.2039474	0.06657151	0.2458739	0.08077852	0	0.1714149	0	0.2440316	0.06533871	0	0.3187414	0	0	0.2400197	0.6025024	0.5877669	0	0.03863092	0.0465269
TCGA-CM-5341	0.747945205479452	0	0.08284451	0.09712805	13.88796	0.1049968	0.1622091	7.008646	0.2488996	1.760446	0.8467074	0	0.04155807	1.11638	0.1628606	0.6997121	0.1403678	1.136327	1.357948	0.3501439	0.192999	0.5325718	0.03808085	0.5202911	0.04035406	0.6529471	0.1359029	0.08247134	0.3393631	0.7922006	0.1424638	0.07381324	0.3680375	0.9097316	0.3407315	0.4276387	0.7195983	0.4870398	0.114103	0.3186327	1.192774	0.2102025	0	0.5748395	1.858375	0.7281116	0	0.1927495	0.1470262
TCGA-F4-6854	0.0438356164383562	0	0.1091164	0	1.729134	0.1276557	0.1469443	1.714303	0.07565339	0.1633207	0.06862879	0.05014021	0.06736872	0.2436183	0.1602913	0.2956382	0	0.6698438	0.8505158	0.04730078	0.1108066	0.3597244	0.06944838	0.5705561	0.2453135	0.1791267	0.2080693	0.04113606	0	0.2972723	0.1979524	0.05982838	0.09943602	0.4853584	0.0789073	0.3119554	0.3332921	0.1973819	0.03303025	0.1807846	1.632797	0.04259424	0.08758508	0.0582411	0.7199142	0.7745871	0.1662416	0.1562307	0.04390483
TCGA-AA-3947	2.75068493150685	0	0.04867919	0	3.074564	0	0.7176553	3.504902	0.1462526	0.5982262	0.09950456	0	0.162796	1.412884	0.05468367	0.3849052	0.1649594	0.9712034	0.7979262	0.5486494	0.5292264	0.4172502	0.04475239	0.2517707	0.0948477	0.9444179	0.03549162	0.01491074	0	0.06896218	0	0.01734898	0.2306749	0.3247933	0	0.2010234	0	1.144733	0.2681863	0	0.6852955	0	0	0.5629566	0.5781047	0.02376868	0	0.1812145	0.07275132
TCGA-CM-6162	0.580821917808219	0	0.153349659	0.095887603	3.982831421	0.507913582	0.075358821	2.711221971	0.399296314	0.513013116	0.146281438	0.030535218	0.246163912	0.339114693	0.378983078	0.293947197	0.242506437	1.580738783	1.462478559	0.115224053	0.222289875	0.379722965	0.046993136	1.012185507	0.159354755	0.431391623	0.529215263	0.169099083	0.083757243	0.622770004	0.175805486	0.13845406	0.096889912	0.369476965	0	0.633265798	0.558177834	0.36061476	0.193106978	0.314563403	1.478467729	0.518794866	0	0.993121601	1.524370996	0.25457952	0.404962206	0.152230318	0.042016683
TCGA-AA-3867	2.0027397260274	0	0.670768685	0	2.329953727	0	0.166398736	2.210440807	0.310041491	0.15852272	0.474615117	0.077056432	0.172555879	0.213941232	0.173886155	0.259624243	0.08742449	1.029428714	1.114869794	0	0.080136343	0.515975912	0.04743537	1.73462094	0.201067977	0.412927941	0.131667906	0.015804668	0.422727253	0.219289763	0.253514176	0.036778157	0.061126066	0.774596708	0	0.213075073	0.128052416	0.303340306	0.020304608	0.158761819	1.320691167	0.261838522	0.269204824	0	0.561699521	0.314920674	0.102193287	0.192078624	0.038556442
TCGA-CA-6719	1.19178082191781	0	0.1102335	0.1550872	2.329449	0.1452979	0.2742395	1.875734	0.3643064	0.2257795	0.5182522	0	0.117968	1.096958	0.2724274	0.4833496	0.1867744	0.8247301	1.002006	0.3727233	0.1027224	0.4724294	0.05067066	0.5294084	0.2147817	0.2512884	0.2089631	0.1586966	0	0.2654791	0.2383083	0.05892988	0.1175312	0.263551	0.05181484	0.5007369	0.2735723	0.06480588	0.02602736	0.101754	1.241476	0.05593941	0.05751315	0.07648857	0.8872873	0.355238	0.08733064	0.1231075	0.03706754
TCGA-NH-A50V	1.61095890410959	0	0.1482769	0.04635783	2.100589	0.1102496	0.5328324	2.341589	1.425555	0.3745629	0.1616486	0.05905024	0.1454572	0.2869098	0.1499099	0.4405464	0.08374443	1.183315	0.8101616	0.2228249	0.2149366	0.3954051	0.09996495	1.599522	0.7704167	0.2684919	0.1585577	0.05752965	0.08098658	0.5461532	0.2816975	0.1831961	0.2693439	0.8189379	0.02323232	0.244927	0.4170513	0.2905714	0.07779961	0.1216631	1.454862	0.05016333	2.114557	0.2514991	1.010892	0.1834119	0.1174699	0.1287953	0.1735872
TCGA-AA-A01C	1.25205479452055	0	0.33740813	0	2.98746784	0	0.19985848	2.23267781	0.14481645	0	0.09852743	0	0.03223947	0	0.08122002	1.10872863	0.08166974	0.72124966	0.57461137	0	0	0.27543521	0.13293876	0.4273685	0.28174891	0.23378595	0.10542927	0.0738216	0	0.13656996	0.40260508	0.01717861	0.22840969	1.07201276	0	0.99524666	0.35886996	0.28337282	0.0758722	0.14831127	0.43181467	0	0	0.11148568	0.6678324	0.44717018	0	0	0.01800923
TCGA-AA-A02F	3.33150684931507	0	0.183573471	0	3.155965789	0.093064086	0.264291074	2.208388854	0	0.093998464	0.046905045	0.068537679	0.07673973	0	0.128885559	0.626788912	0	0.228905795	0.341937436	0	0.089096374	0.131123908	0.063286933	0.610360182	0.625938196	0.178074123	0.10038149	0.077315854	0	0	0.112743822	0.032712254	0.217473798	0.663446231	0	0.379038341	0.056947975	0	0.01805989	0.211815543	0.881014461	0.116445858	0	1.592218879	0.196813084	1.041992547	0	0.128132943	0.154322753
TCGA-AA-A03F	0	0	0.19829284	0	1.21729771	0	0.10962531	0.86614312	1.19150925	0.20307098	0.40532805	0	0.07957719	0.16443796	0.3341278	0.3705938	0	0	0.17729031	1.11745136	0.18478145	0	0.29167545	0.32232461	0.07727171	0.09617627	0.14457376	0.04859068	1.29965427	0.05618297	0.19485423	0.08480448	0.23491138	2.05070141	0	0	0.09842272	0	0	0.24405272	0.65981507	0	0.20691427	0.0917273	1.09894764	0.19364164	0	0.36908521	0.04445246
TCGA-AA-A00O	2.25205479452055	0	0.1979604	0	3.258863	0.04460341	0.2736039	3.674146	0.264336	0.3829355	0	0.1970909	0.08827088	0.09120129	0.1976697	0.7747289	0.0372683	2.742728	0.4916475	0	0.1024843	0.3770675	0.4044257	0.7150762	0.2999974	0.3947285	0.272626	0.1010609	0.1802049	0.3427648	0.2917914	0.07839104	0.2084601	0.4647313	0	0.09083205	0.3821134	0.387934	0.1211795	0.4060727	2.702396	0	0.2295193	0.559616	0.594991	0.128878	0	0.1637629	0.4437794
TCGA-AZ-4615	2.74520547945205	0	0.076029152	0	2.243915956	0	0.078810707	1.788205665	0.17131753	0.369840606	1.320987478	0	0.025426143	0.23643212	0.192166195	0.23226665	0.03220504	0.568824465	0.736410928	0.107112894	0.265682383	1.140437286	0.087370139	0.308963089	0.074068515	0.202816712	0.207870985	0.110618992	0	0.376977881	0.084049569	0.067740859	0.090069379	0.179660058	0.044671507	0.392458175	0.518885091	0.111743135	0.029918879	0.35090378	0.681114364	0.19290979	0.297505379	0.26377461	1.191336492	0.658931453	0.150582011	0.566056463	0.014203248
TCGA-AA-3854	3.0027397260274	0	0.036137195	0	0.757249898	1.025922747	0.174810007	0.928003162	0.054285624	0.129527897	0	0.053967699	0.048340903	0	0.274013861	0.259759963	0	0.540732597	0.24232246	0	0.042093573	0.206498256	0.033222117	0.961215351	0.668900511	0.210327753	0.158084083	0.016603576	0	0.051194359	0.266329037	0.06439542	0	0.803705395	0.042465367	0.671537344	0	0.212449214	0.014220655	0.055595684	2.081175961	0.275074169	0	0.668661019	0.41723734	0.247026875	0	0.168156655	0.07425995
TCGA-AA-A01V	0.0849315068493151	0	0.063459409	0	1.023870563	0.021447514	0.282615075	0.659977857	0.190658608	0.194965655	0	0	0.070741637	0	0.166336337	0.197667787	0.035840862	0.105507086	0.535858855	0	0.032852987	0.90656299	0.038893554	0.265697491	0.04121528	0.010259724	0.15422587	0.07127273	0.173302805	0.35960332	0.66516221	0.060310829	0.150356789	0.646874328	0.149144234	0.174706066	0	0	0.149834716	0.065086574	1.488947245	0.107344274	0	0.097851243	0.628026496	0.299525982	0	0.039372626	0.047420218
TCGA-AA-A00D	1.58356164383562	0	0.1569671	0.1226869	2.856837	0.106101	2.820303	1.940113	3.851357	0.4554566	0.1604273	0.0781388	0.0524939	1.193205	0.1616346	0.507737	0	0.9134025	1.13053	0	0.4063099	1.121193	0.1924067	1.62368	1.019461	0.2791521	0.3242565	0.1282133	0.2143325	1.000665	0.2570752	0.3263291	0.3099234	1.265491	0.1229696	0.324102	0.06492555	0	0.3088472	0.4829756	1.506647	0	1.501424	0.1815265	3.106851	0.5237245	0	0.3895533	0.01954901
TCGA-A6-5657	1.00547945205479	0	0.1068039	0.6344398	2.420889	0.1082903	0.3509961	1.857534	0.3636681	0.4010509	0.2183166	0.1276018	0.2190706	2.302797	0.3199413	0.5425248	0.1930277	0.5682282	1.145899	0	0.2432869	0.4272157	0.1963767	1.020614	0.2497192	0.2935457	0.4153062	0.11123	0.4666774	1.049052	0.76265	0.4770724	0.4133225	2.648528	0.06693702	0.2352281	0.318073	0.1255793	0.7509239	0.6791634	0.9659256	0.108398	0.1485968	0.625808	1.517362	0.2885598	0.1128181	0.2385547	0.1117333
TCGA-AA-3522	3.08767123287671	0	0.092696851	0	1.956128851	0.422940899	0.224205797	1.418261813	1.253250498	0.142395764	0.094740268	0	0.077500646	0.192176397	0.221278	0.41644991	0	0.462351039	0.55252469	0	0.089979813	0.331060181	0.063914458	1.198579342	0.541838324	0.078679923	0.067584552	0.042590445	0.569583058	0.426791749	0.170792608	0.082591534	0.082361313	1.443130036	0.217858957	0.574195066	0.115025289	0.681201639	2.024524965	0	0.889750197	0	0	0.375201538	0.550425025	0.463927991	0	0.086268967	0.008658497
TCGA-AA-3877	2.58356164383562	0	0.045561031	0.106832763	4.047496473	0	0.167921416	2.389220478	0.273768789	0.676553867	0.046565383	0.068041364	0.030473608	0.188911593	0.511808941	0.671375027	0.154392863	1.817985403	1.086276157	0.256752773	0.583777812	0.5206975	0.146600164	0.370296828	0.355088839	0.872873965	0.199309157	0.034889078	0	0.548630751	0.145505606	0.032475368	0.296861075	0.582644749	0.321236764	0.376293537	0.169606759	0.669628989	0.179291095	0.140187788	1.720114718	0.462410466	0.118854864	0.790344419	1.337655374	0.344815655	0.090237382	0.212008448	0.085114014
TCGA-D5-6923	1.03561643835616	0	0.3257239	0.03636982	1.528985	0.01572651	0.2894062	2.48853	0.3262036	0.2620928	0.6658083	0.06949139	0.1971125	0.09646874	0.2918498	0.5072937	0.07884156	0.8123187	1.086313	0.08740814	0.5119049	0.4210036	0.02851892	0.8881693	0.2266601	0.2971586	0.2431371	0.1377794	0	0.1318406	0.6096676	0.1050303	0.11025	0.9270885	0.07290725	0.2241824	0.4041829	0.04559329	0.06103732	0.07158766	1.012377	0.2361324	0	0.0179375	0.4246871	0.6513141	0.1843209	0.02887021	0.1014159
TCGA-AZ-6599	0.564383561643836	1	0.08085923	0.0541717	0.3818353	0.1991052	5.369642	0.4435706	4.164599	0.08280765	0.02361191	0.2070105	0	0	0.3049396	0.6559586	0.019572	0.05761538	0.1549176	0	0.01794038	0.1980226	0.2230097	0.742531	0.9002747	0.06162901	0.06737581	0.1096855	0.09463731	0.1145506	0.05107953	0.04528504	0.06842245	1.451518	0.05429652	0.3816144	0.02866751	0	0.02727395	0.1421701	0.07391685	0	0	0.3740427	0.297226	0.3553316	0	1.247037	0.1165287
TCGA-D5-6922	0.843835616438356	0	0.08226127	0	1.70489	0.3706936	0.1263272	1.29205	0.137304	0.2340096	0.6912804	0.1910999	0.1039279	0.265287	0.2361539	0.6110175	0.06194647	1.367669	0.7218642	0	0.1419557	0.4439497	0.1176397	0.9522166	0.4274129	0.3635194	0.1399441	0.2043768	0.07488308	0.2848677	0.6332057	0.1498447	0.2165608	0.6962351	0.1288886	0.1887236	0.2041521	0.2686727	0.05035541	0.08437053	0.6901552	0.1391484	0.2384385	0.1057023	0.6512794	0.709597	0.07241121	0.102076	0.1912399
TCGA-AA-3692	3	1	0.1594481	0.08308406	5.061493	1.455003	0.9059878	2.262037	0.2129106	0.2721504	0.18107	0	0.2606933	0.2938339	0.3582314	0.2801672	0.03001791	1.502217	0.5015995	0.2995157	0.4540052	0.2024738	0.03257464	0.4057909	0.3797108	0.6444645	0.06458464	0.352733	0	0.2509831	0.1305692	0.1704791	0.2728457	1.083557	0.0832755	0.5852885	0	0.5207719	0.1952091	0.05451217	0.6802051	0.1798088	0.09243367	0.245861	1.005231	0.3633188	0	0	0.08605135
TCGA-4T-AA8H	0.956164383561644	0	0.147723476	0	0.542564618	0.232989975	0.347846305	0.606651074	0.197254715	0.067236923	0	0.049024872	0.010978357	0	0.165944874	0.117984453	0.055621242	0.245603823	0.04891744	0	0.229429684	0.093792683	0.060358698	0.242549713	0.383770634	0.183103119	0.04786846	0.010055252	0	0.255780463	0.153226341	0.076046793	0.097224123	1.250287908	0.192880114	0.33890676	0	0	0.038754616	0.151511257	0.147043861	0	0.256910393	0.037963705	0.324876984	0.577033778	0	0.061102168	0.049060788
TCGA-AA-A01Q	0.0849315068493151	0	0.1588706	0.1241747	1.266	0.3221631	0.08539116	0.9977075	0	0.2440482	0.05412426	0.1581728	0.01771017	0.1097886	0.2082115	0.5900269	0	1.320685	0.5129351	0.298431	0.143933	0.6052214	0.68159	0.1956393	0.6706859	0.4366487	0.05791566	0.008110512	0	0.5251556	0.1561156	0.1132411	0.3136818	0.382779	0.1244609	0.1093441	0.1314258	0.1556657	0	0.1629442	0.2710967	0.2687364	0.5525934	0.1224853	0.9433585	0.09050073	0	0.04928468	0.08903738
TCGA-AA-3979	2	0	0.02211363	0	4.098701	0.2690565	0.1018785	1.92654	0.06643861	0.09058597	0	0	0.04437228	0.09169068	0.1987305	0.1589564	0.03746828	0.3308935	0.1318095	0.1246183	0.2919303	0.1263636	0	0.1143726	0.3016072	0.1072559	0.128983	0.006773546	0	0.03132765	0.0543254	0.01576234	0	0.3688619	0	0.1826389	0	0	0.08702125	0	0.3679132	0	0	0.1534415	0.189668	0.4103037	0	0	0.08262237
TCGA-A6-A565	1.35342465753425	1	0.253561912	2.378235865	3.825989528	0.136579385	0.135069819	3.217700664	0.452322336	0.819589238	0.226757522	0.520674351	0.264992982	2.595530853	0.529621161	1.930863239	0.228237311	1.620409408	0.814722762	0.357228108	0.879913887	0.498068042	0.641046565	1.112375465	0.710191315	0.257495558	0.387071593	0.264555306	0.843933472	3.614577882	0.459397756	5.108614702	1.66151523	7.027116972	0.037245557	0.752601525	0.530953091	0.279502684	2.550659685	0.853333358	0.547607831	0.884628313	0.165366464	0.329889222	3.753610162	0.45653889	0	0.427712213	0.168751025
TCGA-A6-5667	0.876712328767123	0	0.08298535	0.04864658	1.702208	0	0.1051373	1.336894	0.1246613	0.09560812	0.06361101	0	0.09019555	0.1720428	0.2680116	0.4026456	0.0351516	0.6208684	0.5410111	0	0.2899907	0.08891287	0.04768198	0.3678887	0.06063399	0.216342	0.1285709	0.06990207	0	0.1028673	0.1987691	0.03696936	0.06144386	0.2941468	0.04875867	0.4283657	0.07723089	0.1829504	0.03265627	0.03191744	0.2389603	0.1579199	0	0.07197709	0.2532234	0.6787002	0	0.07723089	0.01162707
TCGA-AA-3842	3.08493150684932	0	0.3161891	0	2.405574	0.6767997	0.06474212	1.846544	0	0.07195735	0.5745052	0	0.09399282	0.1456698	0.1578624	0.42931	0	0.1752311	0.1047035	0	0.1091276	0	0.1291925	0.2336203	0	0.2726373	0.1280728	0.04304476	0	0.09954101	0.1035687	0	0.1248598	0.7618183	0	0.58032	0.1743784	0	0.02765028	0	0.6744309	0	0.7331921	0	0.4635804	0.1372322	0.1391641	0.0653919	0.03937886
TCGA-A6-A5ZU	0.802739726027397	0	0.08395078	0.1312334	1.585737	0	0.1289217	1.820053	0.5044465	0.05731579	0.05720093	0.3343281	0.168452	1.276325	0.1414589	0.5431065	0.2844844	1.535334	0.7922893	0	0.1086535	0.3198125	0.2829886	1.19921	0.9269064	0.4478971	0.265234	0.0342862	0.2292632	0.277504	0.5499665	0.2593029	0.1989078	1.493679	0	0.6933586	0.5555866	0.658058	0.1321447	0.4305168	0.3223204	0	0	0.1941719	1.273923	0.6968437	0.3325429	0.3646037	0.07318786
TCGA-AA-3870	2.4986301369863	0	0.04518783	0	4.66784	0.5498003	0.1561368	4.744722	0.4072894	0.1619684	0.3232877	0	0.07555998	0.1873642	0.152285	0.4385035	0.0765641	1.126934	1.144714	0.1273248	0.03509066	0.1936621	0.1038567	0.6844459	0.748383	0.1315024	0.3953531	0.02076198	0	0.1600402	0.188718	0.03220936	0.2141305	0.4271229	0.1593027	0.2799084	0.1682175	0.1328288	0.08891124	0.1390395	1.532531	1.146557	0	0	1.103098	0.7612062	0.3579929	0.08410874	0.02532505
TCGA-NH-A6GC	1.06575342465753	0	0.4597211	0	2.891062	0	3.739008	1.638022	1.912423	0.1629688	0.2891417	0.1056235	0.1300901	0.07331388	0.4667704	1.919181	0.08987648	1.587452	0.8167884	0.1992841	0.05492262	0.1010376	0.2438289	1.463197	2.411585	0.2229746	0.103132	0.04874382	0	0.6011738	0.755811	0.06301612	0.1256809	0.9142954	0.1246674	0.4381024	0.7021008	0.1039494	0.08349636	0.1088097	2.127114	0.08972743	0	2.290186	1.026584	0.1813018	0	0	0.03963783
TCGA-AA-3511	0.580821917808219	0	0.08405011	0.1751849	2.690122	0.06628206	0.06883959	1.730312	0.08417389	0.08607541	0.1145372	0	0.1124342	0.3097782	0.188835	0.4497678	0.1582339	0.6987051	0.5149016	0.1052561	0.1450427	0.1334129	0.1201978	1.179928	0.3821189	0.1857122	0.1293695	0.05435072	0	0.1984516	0.412963	0.09984988	0.1327621	0.4829044	0.08779428	0.462786	0.2085915	0.2196122	0.05880049	0.08620524	0.7410189	0.1421743	0.0487247	0.06480054	0.394336	0.533511	0	0.01738263	0.04187112
TCGA-CM-6167	0.334246575342466	0	0.1486481	0.3485542	1.864553	0.1632765	0.1883279	2.253505	0.03721676	0.685035	0.2532082	0.0369988	0.3728387	0.7704323	0.5983578	0.7212419	0.2308737	2.842123	2.436569	0.1396142	0.5386867	1.76962	0.2163738	1.958645	0.7482097	1.159568	0.4786703	0.3376946	0.2029733	1.123119	1.716327	0.375256	0.4108972	2.651681	0.1164524	0.4092337	1.014496	0.8010719	0.4484677	0.4954937	2.837743	0.2514446	0.06462961	0.6876239	1.348506	0.108871	0.1962732	0.2075106	0.06016709
TCGA-CM-5348	1.07671232876712	0	0.118435143	0.138854995	1.945818117	0.040027782	0.177331752	2.283429554	0.652352628	0.293115087	0.423660782	0	0.290457334	1.964290174	0.598697473	1.9509665	0.08361285	1.47681963	2.323716535	0.055618713	0.084306706	0.507579184	0.117954784	1.779315366	0.307682511	0.78506224	0.1439169	0.133017248	0.161718669	0.349548165	1.086225973	0.084419179	0.128614238	0.587172322	0.023195823	1.10043989	0.759310466	0.406160865	0.031070948	0.182207912	1.13679905	0.550929645	0	0.182621082	1.380466542	0.35179036	0.469141148	0.275556217	0.276565581
TCGA-AA-3949	2.16712328767123	0	0.34701032	0	3.66650141	0	0.30375158	2.71500875	0.20851283	0.46198362	0.28372788	0	0.37135793	0.14388233	0.23388801	0.42404221	0.17638731	0.69232377	1.24102449	0	0.78146671	1.18974967	0.06380361	1.25632567	0.06761233	0.25246115	0.53130529	0.08503316	0	1.22899489	0.10229784	0.1113052	0.20554618	0.28941171	0	0.71649904	0.25835805	0.40801213	0.19117698	0.64063444	1.90964525	0	1.08629318	0.08026089	2.03761946	0.28804016	1.23710864	0.25835805	0.05186088
TCGA-AA-3952	0.167123287671233	1	0.273874415	0	2.794442819	0.079338797	0.396550644	2.347494988	0.058773807	0.320541484	0.879722571	0	0.07850639	0.324450527	0.417533525	0.829646749	0.165728467	0.585438848	0.612166334	0.440965909	0.470928762	0.50303464	0.053953242	1.488759045	0.190579822	0.389016644	0.128365523	0.065913148	0	0.166280895	0.384464497	0.013943891	0.48667579	0.33718448	0.459762843	0.242352721	0.388393331	0.230013918	0.015396379	0.060192179	2.128061642	0.198544352	0.612389997	0.316725514	0.593706688	0.324761154	0.309960503	0.036411875	0.043854302
TCGA-AA-3532	2.41643835616438	0	0.141699143	0	2.174688229	0.492586624	0.074607369	2.672040973	0.425723492	0.414610228	0.165511738	0.060461462	0.121854626	0.92326619	0.250135994	0.363770073	0.102894963	1.817391727	0.995427974	0.342225238	0.267231838	0.578363847	0.074439259	0.388871657	0.512738608	0.294544784	0.295176402	0.1364105	0.165844091	0.458835319	0.308321421	0.216431754	0.16786658	1.238067499	0.047575091	0.501560875	0.100474887	0.119006279	0.302703856	0.24914135	0.803105733	0.102724325	0	0.327739513	1.562592466	1.077351478	0.080184813	0.113034248	0.068068976
TCGA-AA-3989	0.663013698630137	1	0.184304905	0	2.23021734	0	0.053068824	1.094771136	0.138432256	0.212339235	0.141275804	0.068810762	0.123272789	0.286571651	0.20703855	0.347763484	0.195173384	0.689453557	0.583609761	0.649140204	0.089451372	0.197469541	0.063539095	0.340440064	0.179552056	0.167609668	0.503907264	0.084680632	0.188745987	0.489559904	0.13583165	0.172423614	0.136462691	0.640470847	0	0.190274295	0.114349759	0.406320612	0.018131848	0.141773004	0.825556475	0.233819656	0.120198851	0.053285432	1.702376484	0.472452258	0	0.171524638	0.07746882
TCGA-AA-3530	1.58904109589041	0	0.05051614	0.2369033	2.072389	0	0.3141857	1.945882	0.3035432	0.3880004	0.7228161	0.07544137	0.1351514	0.4189143	0.1844284	0.5083653	0	1.385797	0.4516563	0.2846766	0.05884255	0.2164977	0.5108527	0.2612714	0.3937074	0.1347577	0.2578164	0.2707847	0	0.9303388	0.1861505	0.3600731	0.3291469	1.685248	0	0.5215229	0	0.1484912	0.3180646	0.1554343	0.1939515	0	0	0.5257802	0.8998799	0.3576513	0	0.1410396	0.0943708
TCGA-NH-A5IV	0	0	0.202934482	0.090637404	1.819632434	0.352729063	0.525340781	1.495917039	1.451666818	0.366166923	0.059259425	0.202043115	0.161587175	0.881504022	0.135694076	0.541812389	0.147361062	1.879784304	0.936001681	0.108915113	0.682885733	0.69025334	0.595229189	0.278461347	0.941434355	0.10780162	0.648196732	0.177600319	0	0.602361082	0.189919416	0.192865755	0.343443125	0.92953364	0	0.997653613	0.239825248	0.284058147	0.022816708	0.654147781	0.606002594	0.294233364	0.705859068	0.223510605	1.54291713	0.259514109	0.535904652	0.323764085	0.068600563
TCGA-CK-4947	1.46301369863014	0	0.071505697	0	2.032024491	0.217502418	0.065886008	1.257683057	0.276213885	0.188302438	0.041761128	0.061021385	0.06149155	0.550618781	0.166389122	0.440566661	0.017307976	0.968061757	0.547988978	0.287828772	0.245908982	0.408603982	0.028173235	0.400020487	0.23884015	0.153590798	0.29790998	0.065707938	0.669519778	0.651212596	0.185702243	0.283966918	0.121015117	0.53957108	0.072023513	0.21091906	0.101405368	0.300270938	0.14471391	0.157155378	0.457564685	0.155513456	0.159888515	0.023626761	1.071594337	0.548652068	0	0.133094545	0.034349675
TCGA-AA-3554	1.4958904109589	0	0.09637021	0.22597152	3.38466897	0.12213918	0.07769685	2.55573794	0.14476821	0.39476953	0.19698921	0.07196018	0.27394417	1.19875138	0.28417537	0.43295284	0.04082127	1.32185054	1.36424737	0.13577018	0.50514571	1.03253795	0.04429816	0.42722614	0.14082753	0.10516863	0.24591969	0.0442782	0	0.30718004	0.33144667	0.11162377	0.1997919	0.26791391	0.16986915	0.19898302	0.29895868	0.28327842	0.37923462	0.07413093	1.17167795	0.48904285	0	0.27862135	1.68492028	0.54113095	0.09543458	0.1345314	0.03600645
TCGA-D5-5538	1.02191780821918	0	0.1032317	0	2.525433	0.03488944	0.3857589	1.701258	0.413535	0.2819179	0.4454755	0.1370377	0.283859	1.284102	0.2512578	0.3545331	0.2137799	1.029793	1.299005	0.4524705	0.1068863	0.6882114	0.06326954	0.5847678	0.2234879	0.3059808	0.2425219	0.07729461	0.09397264	0.4549842	0.09580592	0.08993398	0.2853559	0.4336726	0.1347879	0.3789342	0.1423308	0.1348656	0.6770598	0.1058787	0.9101315	0.1746208	0	0.6367125	1.619478	0.5264537	0.9087063	0.06404887	0.04714122
TCGA-AY-A54L	1.43835616438356	0	0.01932358	0	1.876333	0.8522734	0.3739033	1.641731	0.02902805	0.1682082	0.05924864	0	0	0.1201832	0.4070081	0.4097579	0.04911141	0.04819083	0.08638443	0.05444764	0.06002298	0.1104204	0.0266472	0.1427747	0.1317768	0.1733884	0.021133	0.088784	0.07915682	0.1779379	0.09968955	0.04820766	0.04578408	1.257059	0.2270743	0.1994944	0.02397816	0.05680129	0.01520837	0.05945716	0.2720333	0	0.05040933	0.04469399	0.1657378	0.5708271	0.07654387	0.05395086	0.1263465
TCGA-A6-2671	1.77534246575342	0	0.19036407	0	2.10127568	0.63694381	0.16663305	1.70870794	0.22877332	0.17545605	0.0389121	0	0.06366274	0.07893145	0.28869089	0.24630616	0.03225438	0.47474659	0.7942729	0	0.11826196	0.54389736	0.0350016	0.90017869	0	0.49858551	0.27758593	0.02332389	0	0.08090473	0.28994759	0.04749125	0.02255184	0.50805261	0	0.23583566	0.09448728	0	0	0.05857356	0.63343228	0.19320533	0	1.45298294	0.45214546	1.37565154	0	0	0
TCGA-NH-A8F8	1.4	1	0.1907336	0.2385266	1.943982	0.01289253	0.07029748	2.047716	0.6494493	0.4036811	0.2599175	0.03797916	0.1275726	0.2108924	0.1714082	0.3290457	0.1077233	1.648983	0.7958147	0.07165682	0.2567316	0.1089906	0.2104172	0.5073334	0.4955066	0.265195	0.2224998	0.1012664	0.1041758	0.2521922	0.4685652	0.167675	0.5573586	0.862538	0.02988453	0.3675676	0.4102397	0.3737719	0.02001525	0.3912484	0.6509352	0.1290536	0	0.05882034	0.5620843	0.3104329	0.1511055	0.02366767	0.06176136
TCGA-AA-3516	1.08493150684932	1	0.04683523	0	4.119224	0	0.05394302	2.478521	2.321758	0.239819	0.287206	0	0.03132586	0.2912923	0.1315307	0.6733184	0.03967769	0.3504054	0.4536415	0.1319667	1.127469	0.2676299	0	0.3287457	0.0912549	0.4883959	0.1878096	0.01434593	0	0.09952487	0.06903459	0.04172951	0.1387106	0.2083268	0.0550368	0.1934087	0.1162334	0	0.03686106	0.2161626	1.138854	0	0.1221789	0.2166528	0.5407561	0.2629858	0	0.2179377	0.05249664
TCGA-G4-6628	4.4	0	0.070846	0.04746333	6.207108	1.067217	0.1258936	3.813539	0.3040729	0.507872	0.1655034	0.151146	0.06092425	0.629468	0.2217003	0.5310776	0.06859319	1.514417	0.9652149	0.3992427	1.037436	1.359087	0.1674799	0.3664183	0.2957958	1.070126	0.4943956	0.06510173	0.08291787	1.21872	0.2088524	0.1803507	0.0719392	0.3432651	0.02378635	0.3761517	0.05023491	0.1785004	0.1672753	0.4359754	0.7512546	0.359517	0.3168269	0.2340879	2.510706	0.3162708	0	0.3579238	0.02646994
TCGA-AD-6964	0.906849315068493	1	0.1953275	0.1526698	1.960057	0.3795878	0.4799375	3.152586	0.6846532	0.6501112	0.1996333	0.243087	0.2504035	1.484807	0.3382737	0.8775285	0.1930563	3.734624	1.673624	0.9172839	0.1769621	2.278821	0.5686416	1.154562	0.2854356	0.5447437	0.4035	0.244306	0.2667123	0.553428	0.2559205	0.2726532	0.3856641	0.6063724	0.03825539	2.218193	0.9695089	0.1913872	0.1152975	0.6010078	2.562295	0.8260119	0.08492501	0.1129445	3.758728	0.2702233	0.9026786	0.7271316	0.07297951
TCGA-AD-6888	1.29315068493151	1	0.02569376	0	2.649074	0	0.217016	1.385408	0	0.04385481	0.1225474	0.0255809	0.01718534	0.0355117	0.03367354	0.13544	0.01451143	0.2990276	0.1914364	0.09652905	0.00665084	0	0.07873708	0.2151538	0.2002494	0.1370823	0.1623537	0.04459758	0	0.02426633	0.1304491	0.01220947	0.0101462	0.4523895	0.1006438	0.2829434	0	0	0.04718453	0.07905773	2.367566	0.04346208	0.0446848	0	0.1130127	0.7360051	0	0	0.07039902
TCGA-AA-3973	1.08767123287671	0	0	0	1.47451	0	0.2762009	0.7613884	0.3002007	0.05116372	0	0	0.03341578	0.7250273	0.09821406	0.3411636	0.08464961	2.118103	0.7816949	0	0.2521766	0.2141137	0.04592976	0.4798753	0.292029	0.6784849	0.1457014	0.2754544	0	0.07077648	0.2945611	0.02670811	0.3255225	0.8889016	0	0.309468	0.061994	0	0.1769412	0.3843067	0.3836316	0.3802915	0	0.1155534	0.7581232	0.463486	0	0	0.06533213
TCGA-AA-3680	0.917808219178082	1	0.089464921	0	1.689892961	0.665206374	0.28851831	0.901806408	0.627176769	0.610804685	0	0	0.07978511	0.247301409	0.234500565	0.278671567	0	1.041205443	1.199836346	0	0.138948184	0.255614061	0.301576211	1.123739035	0.174315606	0.188033739	0.15219908	0.036538226	0	0.506967888	0.512828789	0.116910834	0.459274045	2.122383964	0	0.615750472	0.148019821	0	0.117353678	0.275276681	0.915977113	0	0	1.310529235	0.727987524	0.276660312	0	0.055507433	0.111421514
TCGA-AA-3514	0.0849315068493151	0	0.04370665	0	0.5675794	0.6647233	0.03020378	0.5192349	0.4595957	0.02237991	0	0	0.1023165	0	0.11047	0.09425112	0	0.7629962	0.8141121	0	0.0678809	0.06243806	0	0.3713719	0	0.08479463	0.07966544	0.05355048	0	0.09287662	1.546154	0.01557679	0.1035558	0.3159172	0	0	0.2711726	0.1284749	0.01719937	0	0.5873252	0.1108975	0	0.3538157	1.153448	0.5228478	0.08656462	0.04067589	0.03265991
TCGA-QG-A5YW	2.45479452054795	0	0.170759084	0.040040061	1.506889623	0.450152177	0.389414008	1.274545802	0.538683295	0.253566953	0.191975643	0.07650407	0.182740213	0.354012735	0.364461569	0.270037621	0.202528216	1.19239106	0.496186732	0	1.379072981	0.512277251	0.18838136	0.264951798	0.332711109	0.34371051	0.255223191	0.054919813	0	0.508008274	0.32720599	0.237344387	0.343898085	0.574409543	0.060198479	0.951964609	0.06356725	0	0.134393723	0.15762377	0.502635898	0.216634659	0.178183392	0.315962386	0.957620477	0.075039176	0	0.095350875	0.121220185
TCGA-AY-A69D	1.48767123287671	0	0.079495203	0.149122036	1.947356443	0.443308238	0.201430934	1.402295377	0.286604207	0.407053749	0.064998082	0.213694279	0.031902337	0.164807128	0.25004218	0.439996704	0.067346434	0.475805028	0.177688328	0.044798402	0.098771352	0.113564575	0.241172467	0.387657881	0.18586844	0.748003363	0.127510533	0.124184398	0.1953858	0.270283689	0.281220024	0.206820853	0.499130158	1.440923676	0	0.164139892	0.059186209	0.046734932	0.187697007	0.09784025	0.213649591	0.040340849	0.041475758	2.518970439	0.67133853	0.919921988	0	0.207151733	0.305925495
TCGA-AA-3673	4.16986301369863	0	0.1907341	0.0813161	2.937473	0.01758077	0.6550463	1.860177	0.41676	0.2841165	0.2126603	0	0.08118279	0.2875813	0.1266086	0.423772	0.1468958	0.4324267	0.6717933	0	0.0673249	0.148624	0.01594074	0.3843445	0.3040616	0.0841001	0.06321033	0.02655593	0	0.2947708	0.4089307	0.09269523	0.08216609	0.9544502	0	0.1432085	0.08606448	0.2038761	0.08188079	0.2134088	1.020787	0	0.1809335	0.320839	0.8808805	0.5757133	0.06868447	0.06454836	0.05182784
TCGA-AA-3855	2.67123287671233	0	0.08030143	0	2.085607	0.2239021	0.1572298	1.652603	0.06031477	0.3495047	0.0410358	0	0.06713726	0.3329572	0.3044468	0.3319013	0.06802945	0.9011823	0.5384713	0.1131319	0.1247163	0.5162235	0.1291916	2.106277	0.3520378	0.1363177	0.1756414	0.07379051	0	0.6825622	0.3353629	0.1001664	0.3805225	0.814833	0.04718172	0.1658046	0.04982206	0.2360446	0.2054007	0.06177033	0.4110789	0.2037499	0.104741	0.2785968	1.15232	0.5097161	0	0.07473308	0.4125376
TCGA-CM-6172	0.580821917808219	0	0.159097887	0	0.684215614	0.115222838	0.261775462	0.766397249	0.034142614	0.186207509	0.116146468	0.067885315	0.068408365	0.188478333	0.255317565	0.473785915	0.019254846	0.56681748	0.541892416	0.06404098	0.352993299	0.194813739	0.041789698	0.688515923	0.376416613	0.870872068	0.140853536	0.069618123	0	0.321983818	0.368513272	0.04455122	0.282717499	0.713998459	0.026708335	0.140786447	0.141014811	0.133618645	0.044719975	0.24476598	0.538121012	0.115337487	0.059291138	0.289128327	0.352391087	0.249695446	0.045015213	0.063456665	0.046705345
TCGA-AZ-6600	1.00821917808219	1	0.1145598	0.089541	3.967164	0.01935901	0.1495383	2.93044	0.430232	0.3128541	0.4097981	0.05702831	0.1149354	0.9104245	0.2895537	0.3499766	0.2749816	1.190414	0.9104535	0.1613964	0.815481	0.4909706	0.06143586	0.6066152	0.241812	0.2546682	0.3897818	0.07602919	0.3910676	0.4733548	0.2251465	0.2857991	0.3505983	0.9129815	0.08974732	0.4336576	0.5923105	0.3367464	0.3155699	0.3231174	1.038513	0.3875655	0.2490431	0.1987262	1.354192	0.5640247	0.07563172	0.1066159	0.03923569
TCGA-F4-6463	1.13698630136986	0	0.1738713	0	1.163167	0.01175273	0.1014642	1.176761	0.2786037	0.4985706	0.189551	0	0.1628119	0.1922479	0.5924644	0.1666419	0.05891983	1.040677	0.777277	0.1306436	0.06300931	0.8941951	0.03196912	0.7022863	0.203265	0.3598135	0.3718533	0.1242684	0	0.1806329	0.8827568	0.09501561	0.09612395	0.5284853	0	0.4786739	0.3452043	0.06814551	0.04561438	0.2139954	1.023593	0.05882212	0	2.895489	0.8794782	0.311287	0.2295776	0.08630107	0.3421379
TCGA-AA-3971	1.33972602739726	0	0.1044926	0	3.269023	0.1059468	0.5295426	1.736668	0.3924245	0.3477842	0.05339804	0	0.05241762	0.1083155	0.1760724	0.4882214	0.1327855	0.9120751	0.7785427	0	0.2231457	0.2985504	0.1200794	0.3860286	0.152697	0.2280652	0.2856929	0.04000844	0	0.5181093	0.3080419	0.3072346	0.6189459	1.960839	0.3683727	0.4315081	0.0648312	0.1535771	0.2055989	0.4018948	0.4011888	0	0.2725895	0.6646301	1.171994	0.3826561	0	0.243117	0.05856181
TCGA-AA-3666	0.167123287671233	1	0.081277673	0	3.406324712	0.769148559	0.074889997	2.139228362	0	0.277453905	0	0	0.144967391	0.449339983	0.13695467	0.253169356	0.091808668	0.810789504	0.444088383	0	0.084155033	0.154814616	0.049814167	0.520459712	0.158363375	0.459916459	0.217282701	0.041493107	0	0.038381124	0.133113723	0.038622514	0.064191426	1.009269773	0.127347507	0	0.134474009	0.318552264	0.063968539	0	1.664305682	0.137484622	0	0	0.428994705	0.687883803	0.107318093	0.050427754	0.273307341
TCGA-D5-6898	0.627397260273973	0	0.1427248	0.08366624	2.422109	0.009044437	0.3945237	1.554273	0.08040091	0.2740573	0.0729355	0	0.1193273	0.369866	0.2956077	0.487316	0.1057989	0.711879	0.8241338	0.2010763	0.2424474	0.3313253	0.1148101	0.9820404	0.1738052	0.3504493	0.208119	0.06011155	0	0.2653788	0.2936479	0.1176282	0.1373788	0.3223852	0.167718	0.3683686	0.1328278	0.1573263	0.07722665	0.08234121	0.4680638	0.4074046	0	0.02063198	0.700353	0.4791084	0.03533477	0.08301737	0.06665717
TCGA-D5-6537	0.4	1	0.08186558	0	1.679239	0	0.05657377	1.883727	0.2767032	0.07335846	0.2300931	0.03056475	0.041067	0.04243033	0.1379453	0.1618273	0.190725	0.5104089	0.1829866	0	0.2701845	0.05847541	0.04703858	0.1134139	0.07975443	0.4864053	0.08953133	0.02507594	0	0.1014792	0.01508361	0.01458821	0.07273771	1.007087	0.2645541	0.1267756	0	0	0.07248515	0.06297352	0.4976647	0.1038593	0.1067812	0.5207096	0.2903157	0.3647505	0.2026769	0.03809438	0.7226212
TCGA-SS-A7HO	5.01095890410959	0	0.07186974	0	1.042396	0.6350092	0.1513633	0.9166472	0.3393135	0.08411604	0	0.03066602	0.0961405	0	0.2595045	0.3321072	0.01739609	0.8193602	0.4130841	0	0.01594587	0.1466729	0.009438889	0.1289617	0.04000935	0.1095548	0.1272563	0.05031807	0	0.07272533	0.1261133	0.08050099	0.1216312	0.8905434	0.09652025	0.29679	0.05096082	0.06035993	0.04040296	0.03159109	0.1839577	0	0	6.625426	0.1490258	1.348534	0	0.03822061	0.09206547
TCGA-CK-5915	0	0	0.126874	0	1.640791	0	0.1275304	0.9577831	0.1386118	0.1181192	0.02357651	0.06890001	0.007714542	0	0.1619587	0.09948987	0	0.05752898	0.1890598	0.1299964	0.03582696	0.03295428	0.02120717	0.06817633	0.06741935	0.06713083	0.1513683	0.01413174	0	0.03267966	0.03966895	0.02877454	0.04099191	0.814453	0	0.3810422	0.02862452	0.06780794	0.01815537	0.1064677	0.3395076	0	0	0.5068682	0.1750243	0.3829574	0	0	0.02585643
TCGA-AA-A00L	3.16986301369863	0	0.1500398	0	3.926389	0	0.03456201	2.2626	0	0.1024368	0	0.07469038	0	0.103686	0.1264102	0.6650812	0	0.1247275	0.1117901	0	0.09709465	0	0.3448413	0.3141	0.1461706	0.08490126	0.05469642	0.1148953	0	0.2125564	0.08600547	0.01782443	0	1.863127	0	0.1032663	0.06206025	0	0.07872458	0.153887	0.3840416	0	0	0.2313539	0.2474783	0.6471319	0	0	0.03737255
TCGA-G4-6321	1.84109589041096	0	0.087957973	0.117855018	1.045809827	0.17836408	0.075256338	1.170092349	0.075503583	0.167286678	0.025684836	0	0.033617661	0.677307039	0.254076209	0.44257923	0.021290254	0.501388096	0.187242267	0	0.097576956	0.430814561	0.06931086	0.222818976	0.342758863	0.030472499	0.073290826	0.038488688	0.102945648	0.480627495	0.203734198	0.11195609	0.178630428	0.908244926	0.236253147	0.363227257	0	0.073871661	0.237346911	0.193314226	0.160812211	0.063764842	0.065558738	0.20344021	0.853896196	0.386526659	0	0.163717395	0.037558193
TCGA-AA-3489	0.586301369863014	1	0.230545452	2.786114265	3.993596493	0.017981064	0.322725184	3.028303179	0.932420146	0.926241458	0.181252012	1.218289514	0.290609374	8.382684528	0.433298106	1.1217954	0.480769457	2.476726763	3.184395287	1.049359026	0.502662128	1.013386601	1.010829158	1.323421973	0.293707893	0.468781655	0.814584633	0.285186162	0.871756666	2.763589709	1.11095435	1.270398014	2.804732793	11.586000119	0.062519415	0.54925964	1.606439672	0.886202202	0.970047903	0.900355018	2.723555958	0.989942582	0.231316507	0.143563102	4.94345519	0.290081308	0.597110998	0.495135515	0.212031658
TCGA-AA-A01S	0.0849315068493151	0	0	0	0.9522634	0	0.0772187	0.8749242	0.4406242	0.0214561	0.5995669	0	0.05605318	0.08687104	0.258891	0.1054207	0	0	0.3746433	0	0.01626972	0.1795821	0.05778353	0.07740049	0.1224658	0.04064722	0.1527539	0.0192525	0	0.02968094	0.02058793	0.007466903	0.09928119	0.116491	0.09848053	0.08651934	0.1559874	0	0	0	0	0	0	0.4361281	0.08293768	0.3785066	0	0	0
TCGA-DM-A1HB	11.3041095890411	0	0.09120201	0	3.386681	0	0.2024464	1.43668	0.07472973	0.08490877	0.1694772	0	0.0332731	0.0343777	0.2328445	0.2383908	0.04214409	0.2067705	0.2470976	0.09344656	0.1738384	0.09475534	0.0304891	0.1347715	0.1130819	0.02412814	0.05440474	0.01523768	0	0.1174571	0.02036829	0.005909793	0.5107544	0.2996454	0.05845793	0.4451007	0.02057643	0	0.01957619	0.02551105	1.25209	0	0.08651574	0.2109434	0.1859865	0.5465215	0.1313695	0	0.1022264
TCGA-D5-6931	1	0	0.06628291	0.155422	3.945137	0.07840622	0.08652105	1.328309	0.5642345	0.4751606	0.5645338	0	0.1108337	0.3664421	0.1551224	0.4685113	0.1310244	1.102014	0.4280065	0.373528	0.2745177	0.2840696	0.08124809	0.3101685	0.1937208	0.1928918	0.2013598	0.06090862	0.3620271	0.719906	0.4342233	0.2283541	0.1701338	0.472959	0.07789005	0.8667765	0.08224886	0.1298916	0.1304178	0.2719299	0.8058738	0.1681805	0.1152746	0.2555123	1.246342	0.7389799	0	0.1028111	0.08667765
TCGA-T9-A92H	0.991780821917808	0	0.059926238	0.046838899	1.898357798	1.10381033	0.069020735	1.066687038	0.390094216	0.235252601	1.16369789	0	0.03340151	0	0.252442578	0.351786866	0	0.448347894	0.133947618	0	0.209411064	0.085608912	0.036728113	0.280422672	0.447586611	0.213147057	0.101947424	0.021415082	0	0.084895504	0.073608818	0.046274279	0.496949292	0.888522037	0.37557458	0.164979117	0	0.058717351	0.047164169	0.122925617	0.14060485	0.101367766	0.521097723	0.277209809	0.303119781	0.91194596	0	0.074361025	0.022390023
TCGA-AD-6965	2.20547945205479	0	0.285620477	0	2.429306739	0	0.508403041	1.751113178	0.312044864	0.199433794	0.079613651	0.077554342	0.112886066	0.215323641	0.189593889	0.699915641	0.109986744	1.165590566	0.831882204	0.146324905	0.282289539	0.333842116	0.02387094	0.470030998	0.227663105	0.201501153	0.08519059	0.035790281	0	0.496590147	0.363592015	0.064777657	0.09228156	0.844568689	0.152562257	0.214451885	0.032219961	0.228975284	0.091961138	0.159787679	0.515074682	0	0	0.480450029	0.539632243	1.166396516	0.102853623	0.096659883	0.116416738
TCGA-DM-A1D7	1.10958904109589	1	0.117918203	0	2.176300534	0	0.325952756	1.515013069	0.165328614	0.177114088	0.144621122	0	0.047321928	0.162976378	0.494529203	0.491616693	0.013319664	1.019459083	0.210857385	0.132902284	0.018313904	0.08984244	0.065043659	0.609877557	0.367607463	0.12963713	0.418403115	0.024079393	0	0.167050787	0.131323162	0.089654091	0.167632846	0.869811458	0.166280968	0.35709642	0.097547905	0.09243156	0.068057728	0.120941746	0.975895189	0.039892725	0.041015027	2.672812596	0.456418192	0.322426412	0	0.087793114	0.229098223
TCGA-A6-6140	0.975342465753425	0	0.1182237	0	1.084836	0	0.1386412	0.8408927	0.2906127	0.07704609	0	0.1284048	0.03594281	0.08912649	0.3259792	0.4944353	0.03642046	0.1608199	0.09609255	0.06056662	0.05842246	0.1535372	0.01976126	0.2223482	0.06282268	0.172023	0.1410479	0.06913325	0	0.274064	0.1108929	0.07277729	0.1018588	0.1553701	0.1010374	0.266297	0	0.06318477	0.1015052	0.09920867	0.2613408	0.1636203	0.1121489	0.2734425	0.4750915	0.8816227	0	0.1000233	0.02007795
TCGA-AA-3662	0.504109589041096	0	0.1230462	0.2098343	3.85607	0.02268338	0.4380433	3.275267	0.1344299	0.4238558	0.04573042	0.06682132	0.1197088	0.4638106	0.2701646	0.4502787	0.07581223	1.450627	0.7667612	0.1891117	0.1737303	0.5113609	0.1439715	0.4463064	0.5666729	0.2766984	0.1875797	0.1164958	0.366578	0.2377029	0.6485305	0.1395321	0.198776	2.133301	0.07886917	0.6467059	0.2498483	0.3945732	0.1056457	0.1720926	0.8589516	0.3405893	0.1750855	1.164259	1.077505	1.299913	0	0.1041035	0.3343514
TCGA-A6-2678	1.1972602739726	0	0.171601792	0	2.577337105	0.115993259	0.412857067	1.876179596	0.05728484	0.331947242	0.038974355	0	0.114776281	0	0.203477896	0.178172404	0.032305985	1.711822281	0.397771868	0	0.05922559	0.708197873	0.192816795	0.267668134	0.148601361	0.212700272	0.16681804	0.035041807	0	0.054022786	0.103049246	0.061157871	0.112939623	0.964724167	0.044811528	0.787376645	0.047319229	0.448373559	0.030012659	0.117334559	0.390428168	0	0	0.132300702	0.792520568	0.46549074	0	0.106468265	0.03561942
TCGA-CM-6675	0.419178082191781	0	0.06518998	0.05095309	2.700027	0.330486	0.3553943	2.425067	0.261144	0.4228185	2.509618	0	0.06540372	0.1801999	0.2624112	0.9293822	0.1104548	0.4335373	0.5180913	0.1224563	0.1603073	0.1241714	0.00998855	1.196133	0.6350886	0.2318693	0.1267453	0.03328017	0	0.1385287	0.3363125	0.01548888	0.2059428	0.2778881	0.204282	0.4935436	0.1617853	0.1916247	0.01710231	0.1002923	1.390501	0.0551358	0.2834347	0.02512992	0.3082398	0.2334232	0.04303804	0	0.03247559
TCGA-AY-4071	0.0794520547945206	1	0.06667253	0.1042237	2.190779	0.06760038	0.02047756	1.461462	0.1335414	0.3869149	0	0.06637968	0.08918817	0.4607451	0.4119305	0.5271781	0.1129667	1.108492	0.5961079	0.1252412	0.05177463	0.8254694	0.1634514	1.215126	0.3897191	0.107792	0.2754591	0.06807405	0.1820776	0.629685	0.5241309	0.2296964	0.184298	1.06269	0.05223194	0.5506557	0.2206196	0.2613102	0.27986	0.2735283	0.881717	0	0.1159522	0.2056114	1.642232	0.5642749	0	0.2068308	0.04151769
TCGA-CA-5797	0.273972602739726	0	0.06621015	0	2.484523	0.01918045	0.04357617	1.759298	0.0852527	0.1743572	0.05800259	0.02825114	0.1265281	0.5490598	0.2178185	0.4011403	0.01602619	1.085079	0.2537031	0.1066051	0.1101762	0.5134664	0.02608679	0.4822135	0.1474348	0.1651543	0.1517161	0.1651419	0	0.1607961	0.07900385	0.03033888	0.1008477	0.5101298	0.2445286	0.7030759	0.2347388	0.1112134	0.01488852	0.1746202	0.4720989	0.09599765	0	0.04375403	0.5554017	0.1847346	0	0.05281623	0.00353398
TCGA-AA-3681	0.498630136986301	0	0.17583936	0	1.33202383	0	0.06750834	1.75135999	0.17609832	0.45019112	0.05990519	0.175067	0.11761059	0.121515	0.23045026	0.21066026	0	1.02322168	0.65506261	0.49545896	0.18206435	0.08373303	0.05388498	0.19488172	0.11420321	0.1705717	0.25640621	0.04488392	0	0.37365863	0.31678188	0.1462256	0.20831143	0.48884204	0	0.24204608	0	0	0.18452278	0.45087014	0.48758466	0.29743971	0.15290379	0.3389194	0.98611075	1.20200383	0	0.32729223	0.08759763
TCGA-AA-A00Q	3.5013698630137	0	0.1392326	0	4.040808	0	0.06414511	1.771039	0.1394377	0.2376461	0.04743396	0	0.01552101	0.6735237	0.4170845	0.2668871	0.1179546	0.8102045	0.3457932	0.261542	0.1261415	0.3315063	0.04266705	0.9258642	0.1808561	0.168827	0.06767562	0.07818769	0	0.1643719	0.2736364	0.1075137	0.1099631	0.5290005	0	0.3833125	0.1727704	0.1364239	0.07305416	0.1428027	0.4157762	0	0	0.1073449	0.6124074	0.260603	0	0.1727704	0.01734033
TCGA-AM-5820	0.0383561643835616	0	0.2254059	0	2.213503	0	0.2218519	1.974556	0.09234732	0.07344826	0.1466021	0.1530108	0.04797014	0.04248227	0.07481184	0.1178367	0.1215191	2.197445	0.5648994	0.1154767	0.1432139	0.05854699	0.1412885	0.3860794	0.05988905	0.7901339	0.05976062	0.0627666	0	0.0580591	0.1308847	0.01095455	0.1213779	0.1310246	0.02407981	0.2538617	0.07628203	0.1204685	0	0.06305061	0.7474108	0.05199323	0.05345595	0.04739519	0.2703917	0.3501889	0.121755	0.01907051	0.02679651
TCGA-CK-6746	0	0	0.07307258	0	1.626735	1.058421	0.3510765	1.15747	0.9722511	0.3314049	0.384086	0.4676889	0.05585688	0.3895507	0.4456094	1.583276	0	1.822348	0.233332	0.4117902	0.7538925	0.9544173	0.3550839	0.2313883	0.6305239	0.6328886	0.1369971	0.03197513	0	0.3697124	0.2308031	0.08184829	0.1731336	0.4237031	0	0.7328389	0	0.06137013	0.008215832	0.09635944	0.2805547	0.1589212	0.5446403	0.5794677	0.9435559	0.1529112	0.08270072	0.3303124	0.02340158
TCGA-AA-A00W	1.24931506849315	0	0.1946116	0.1140826	1.751842	0	0.1120731	1.266921	0	0.1494758	0	0	0.03254161	0.1008658	0.1639624	0.3672111	0	0.7280091	0.1812489	0	0.03778146	0.2085124	0.04472821	0.197713	0.2369912	0.09439078	0.159626	0.08941613	0	0.1033874	0.1075707	0.1040376	0.2305503	1.122637	0	0.2009148	0.0603722	0.1430143	0.07658326	0.07485061	1.899111	0.1234476	0	0.1125305	0.3370456	0.6414077	0	0	0.06362302
TCGA-AZ-4323	0.117808219178082	1	1.475381	3.431837	4.514665	6.055455	0.1685692	1.464522	0.2836903	0.9669965	0.1206323	0.5993113	0.4499863	5.285462	1.544665	1.493223	0.09999258	2.119354	8.301619	1.529831	0.5407745	1.652426	0.8029688	1.316845	0.7129175	0.8071869	2.45257	0.9436057	2.127392	4.782201	5.851377	2.629085	1.510132	6.496983	3.190086	0.7311199	0.4100912	0.2775587	2.916882	1.815853	1.404814	0.8984408	0.3694867	18.12691	8.044242	0.3746012	0.09350763	1.31815	23.88418
TCGA-CM-4746	1.91506849315068	0	0.04464024	0	1.581009	0.2489381	0.4113193	2.565921	0.4023539	0	0	0	0	0	0.1629762	0.1283525	0	0.2226555	0.03326008	0	0.121329	0.06377177	0.02051962	0.5936942	0.04348906	0.05412868	0.1301874	0.06153114	0	0.09486051	0.0328996	0.00795476	0	2.010453	0	0	0	0	0.01756676	0.1373546	0.3427833	0	0	1.135745	0.1619869	0.2724572	0	0.166179	0.008339386
TCGA-A6-6137	0.953424657534247	0	0.204243282	0.10082427	1.129459379	0	0.148572349	0.877171149	0.290667907	0.286225526	0	0.096321869	0.100658984	0.178286819	0.332078835	0.224083539	0.05464106	0.911485913	0.816941721	0.181734354	0.066781207	0.184279653	0.118590061	0.428895709	0.293228178	0.125131405	0.352686756	0.102073219	0.088069393	0.39594531	0.369713273	0.455902196	0.127347728	0.771021247	0.101056584	0.35513002	0.080033864	0.252787075	0.160747028	0.429985858	0.371449514	0.109100889	0	0.22376815	1.007101417	0.509128779	0	0.080033864	0.052212568
TCGA-AA-3860	2.58904109589041	0	0.8132705	0	3.538695	0.424074	0.09634563	2.219531	0.4188694	0.452128	0.5224675	0	0.1398749	0.3853825	0.3393319	0.2505394	0.1181114	1.738462	1.073385	0.1309449	0.09022088	0.5975049	0.1708952	0.3605372	0.3621933	1.003039	0.5251836	0.04270455	0	0.4608533	0.1712502	0.1159379	0.3303279	0.8139355	0	0.1919111	0.1730002	0	0.09143914	0.4289778	0.743445	0	0	0.2687191	1.318427	0.1021107	0	0.04325005	0.1215437
TCGA-AA-3986	1.58904109589041	0	0.108545043	0.305423293	1.358320606	0	0.060008642	0.719002364	0.456560593	0.555802931	0	0	0.101640866	0.720103699	0.256061103	0.764634425	0.147130822	0.974516864	0.549940407	0.611690297	0.067432627	0.868360343	0.15966247	0.769918914	0.253790129	0.178998673	0.823049189	0.099744093	0.177856938	1.230177153	0.565312622	0.541587426	0.642949732	0.832859103	0	0.448242687	0	0	0.615088576	0.333984747	1.361375469	0.110165118	0.113264393	1.004226247	2.305985375	0.243797674	0	0.242443672	0.113554814
TCGA-CM-6165	0.580821917808219	0	0.1108066	0.05773829	1.497086	0	0.09642608	1.743357	0.1849496	0.2647788	0.1761654	0.03677329	0.1070525	0.8678347	0.2558639	0.3008983	0.06258179	1.535217	0.8622786	0.1387633	0.1051685	0.3165902	0.03395605	0.7641279	0.5517398	0.3403759	0.1705529	0.04148314	0.1008681	0.3313937	0.2238193	0.166739	0.1458546	0.4654943	0.05787133	0.5592667	0.3666592	0.4342851	0.04844938	0.2651781	0.7563209	0.124956	0.0642357	0.2562873	0.9585079	0.5831181	0	0.1604134	0.01840012
TCGA-AA-3520	2.0027397260274	0	0.204403	0	1.675758	0.6677977	0.2929715	3.123278	0	0.1860697	0.09284839	0	0.3190027	0.0941694	0.2296157	0.4897605	0.1154436	0.9062366	1.286042	0	0.176366	0.1297797	0	0.3859547	0.1327546	0.2643729	0.2318223	0.1043499	0.1860697	0.2252218	0.2789701	0.01618845	0.08071663	0.7576672	0.05337713	0.1875763	0.2254567	0.2670395	0.0357495	0.06988137	0.7266522	0.1152521	0	0.6303585	0.6892762	0.7651659	0	0.04227313	0.02545678
TCGA-G4-6625	7.64931506849315	0	0.09991249	0.8329869	2.28041	0.3714441	0.1432049	2.243369	0.03335321	0.5798135	0.04538443	0.09947364	0.1633542	0.8285426	0.3741217	1.204958	0.05642898	1.550394	1.07527	0.5004825	0.1120704	0.4440555	0.1428822	0.5413585	0.2811928	0.1669167	0.2994756	0.15982	0.09095113	1.368246	0.272722	0.4352117	0.5260588	2.715892	0.07827246	0.5959693	0.2755089	0.1957939	0.3756998	0.5123718	0.440434	0.563354	0.3475217	0.1540601	2.204624	0.677562	0	0.2686212	0.07051211
TCGA-DM-A28M	7.93150684931507	0	0.07856118	0	2.341832	0.461996	0.1809675	1.668639	0.09441226	0.04022711	0.0160586	0.02346483	0.005254584	0.03257415	0.1235522	0.2992965	0.09317721	0.2351073	0.2458408	0	0.02440271	0.06733815	0.04333433	0.3656893	0.1071493	0.01524154	0.05155051	0.004812757	0.06436338	0.0556475	0.01543977	0	0.0279207	0.3494463	0.05539106	0.1622113	0.01949694	0.04618582	0.03091528	0.09669068	0.713852	0	0.1639538	0	0.1554963	0.2493349	0	0.0146227	0.1262159
TCGA-D5-6920	1.03287671232877	0	0.163970144	0.128160572	2.043300791	0.027708672	0.058754734	1.28333966	0.054737211	0.298526634	0.018620524	0.054416641	0.121857593	0.188854502	0.322342188	0.641706037	0.108042343	0.636102596	0.434379149	0.256675179	0.290032205	0.416432112	0.083746205	0.262494761	0.159741688	0.061855911	0.292231755	0.069757068	0	0.387151729	0.326729205	0.159081213	0.269792145	0.486234714	0.149865185	0.564269726	0.0452148	0.214216519	0.050186335	0.140145422	0.477989085	0.23113536	0	0.021069482	0.919547961	0.653839779	0.108252134	0.0339111	0.037438848
TCGA-DM-A288	1.16986301369863	1	0.038451908	0.120217461	1.316443806	0.246917821	0.059049904	1.159709555	0.115525616	0.065630767	0.183397879	0.038283013	0.060010191	0.106289828	0.208775229	0.414597743	0.152019172	0.767157878	0.2864934	0.216690312	0.328458631	0.036620865	0.02356674	0.340928184	0.174814789	0.055949995	0.037379982	0.039260207	0	0.090789228	0.056677668	0	0.060737045	0.299314936	0.391606993	0.158789257	0.127237458	0	0.020175384	0	0.44289651	0	0.066872884	0.029645462	0.21141088	0.438083015	0.304628711	0	0.095777647
TCGA-AA-A02O	0.0767123287671233	0	0.01906943	0	2.273765	0.01933481	0.3865565	1.858125	0.4010478	0.0585868	0.0389796	0.05695701	0	0.2372051	0.1713729	0.2056112	0	0.4755701	0.4830737	0.1074631	0.04442517	0.4903568	0.7187774	0.1268072	0.3715534	0.07399265	0.08342024	0.02336435	0	0.1891052	0.2810812	0.08835103	0.3388644	1.272335	0.2240878	0.4724895	0.04732559	0.1121085	0.01500835	0.1173503	0.4881008	0	0.1989854	0.6174863	0.6919761	0.139666	0.07553716	0.03549419	0.04274905
TCGA-AA-A02E	0.246575342465753	1	0.1208424	0.1133418	2.353909	0	0.2894977	1.983749	1.96053	0.2227576	0.1482075	0	0.04849543	0	0.2579213	0.6949076	0.1228497	0.3616408	0.8643452	0	0.2064487	0.2071584	0	1.660718	0.423814	0.4337224	0.1585894	0.05922365	0	0.1369547	0.451238	0.06890802	0.1717899	0.6584576	0	0.1996101	0	0	0	0.2230936	0.4330312	0	0	0.3353993	0.4305303	0.5900394	0	0.5398214	0.1896296
TCGA-AA-3710	2.24931506849315	0	0.16566743	0	4.87319169	0.05599098	0.07632375	3.26033493	1.16137989	0.36759539	0.67727765	0	0.12927491	1.25934181	0.31017029	0.77404865	0	0.82631185	0.41144576	1.24479391	1.47946624	1.02556025	0.17768746	0.08160366	0.1075968	0.18748857	0.20131138	0.15223493	0.22621255	1.05612984	0.33915537	0.27553352	0.39252212	0.73690171	0	0.11402211	0.27409696	0	0.43462133	0.16991531	1.16611575	0.28023346	0	0.44703908	2.18603847	0.39097195	0.10937267	0.51393179	0.13411172
TCGA-AZ-4614	0.471232876712329	1	0.07866069	0	3.668101	0.9171867	0.3080344	2.204072	0.4135768	0.02013903	0.5225655	0	0.3419806	0.08153852	0.1656812	0.197899	0	0.2942564	0.2051268	0	0.1527101	0.1123724	0	0.1307688	1.379379	0.05722817	0.02867545	0.0361414	0	0.195013	0.08695871	0.02803421	0.1397803	0.754448	0.4159592	0.1624168	0.04880408	0	0.01547722	0.6050822	0.2265072	0	1.12861	0.2729044	0.2205654	0.4416897	0.07789699	0.1464122	0.3526765
TCGA-G4-6320	2.2027397260274	0	0.01346592	0.06315051	0.8187091	0	0.1550953	1.089123	0.4045725	0.4275023	0.05505105	0.1206609	0.03602685	0.3350058	0.1815229	0.5323735	0	1.208969	0.2809252	0.1517706	0.4810208	0.2308443	0.06189831	0.3283323	0.6034583	0.03918755	0.1178147	0.07424452	0	0.1716904	0.1786375	0.1199793	0.1116686	1.100616	0.03164801	0.2780412	0.06683813	0.1583312	0.1377763	0.1657344	0.2240377	0	0.07025696	0.2491653	0.3642592	0.3156014	0	0.0250643	0.05031222
TCGA-AA-3856	0.0821917808219178	0	0.1577166	0	2.699802	0.01776794	0.08880762	1.350054	0.2632482	0.3948194	0	0	0.1172102	0.5086254	0.2263847	0.453477	0.02969195	0.8740612	0.3655861	0.1975089	0.1496917	0.7510316	0.1449941	1.087622	0.2390102	0.1019946	0.3705232	0.08588373	0.1435707	0.6951214	0.2583028	0.3185193	0.2491227	1.227688	0.1235568	0.361833	0.08698079	0.1030234	0.2068814	0.1617606	0.7176733	0.2667843	0.09142993	0.1621275	1.849889	0.4706081	0	0.09785338	0.07856946
TCGA-A6-6138	0.767123287671233	0	0.1514906	0	3.717382	0.03291404	0.05483691	2.321702	0.1300404	0.421097	0	0	0.1736998	0.8075982	0.1823322	0.287791	0.1100051	1.619146	0.8223461	0.06097887	0.07562587	0.4637469	0.009947882	0.6795798	0.1897509	0.209932	0.3550199	0.05634594	0	0.3525764	0.1435471	0.1426888	0.1538282	0.5174146	0.07629384	1.072438	0.1611266	0.06361484	0.1362614	0.2330625	0.8032072	0.3843792	0.1129123	0.2502761	1.292192	0.4490952	0	0.2014083	0.02021461
TCGA-A6-2685	1.27123287671233	0	0.08584403	0.1006447	3.357008	0	0.2867284	1.993298	0.2579114	0.4615409	0.219341	0.06410023	0.172251	0	0.397785	0.4627955	0	2.033811	1.087316	0.241881	0.1999868	0.4905373	0.1578385	1.157542	0.292706	0.3226805	0.578941	0.06573642	0.3516502	0.3040309	0.917365	0.08413435	0.3559387	1.050063	0.1008766	0.7089952	0.7456525	0.1261685	0.1689061	0.3962032	1.510618	0.7623462	0.2239409	0.1489131	1.784068	0.3353218	0	0.07989134	0.02405519
TCGA-QG-A5YX	2.74794520547945	0	0.047562054	0.044609927	0.729945418	0.983768617	0.162149226	1.066151012	0.971694873	0.077933005	0.427772546	0	0.095435991	0.078883407	0.28317232	0.437611122	0.048352122	0.379566126	0.155922937	0.053605851	0.140350607	0.054356634	0.139921177	0.140567318	0.463355258	0.17993519	0.048547973	0.005827423	0.077933005	0.161710985	0.042063551	0.030511507	0.146497756	0.772193093	0.134138144	0.157128083	0.023607443	0	0.052406338	0.058537913	0.09739181	0.048271936	0.04962997	0.022001495	0.244763069	0.306546434	0	0	0.067527664
TCGA-DM-A1D8	1.04931506849315	1	0.05804899	0	3.302292	0.02207131	1.420745	2.309189	0.08720173	0.1114646	0.04449647	0.04334552	0.1698647	0	0.2812148	1.074459	0.02458886	0.5066868	0.3784421	0	0.09015603	0.04146357	0.08004954	0.7613017	0.8765565	0.08798439	0.005290384	0.01111298	0	0.2364287	0.1140847	0.0387906	0.06017274	1.097378	0.01705356	0.3595747	0.1440632	0.04265848	0.06853006	0.02232654	0.5293238	0.03682212	0.07571608	0.1846116	0.4260744	0.368468	0	0.1350592	0.04879943
TCGA-AM-5821	0.0767123287671233	0	0.09409808	0.05516095	14.00403	0.0238519	0.1246353	8.97978	1.554905	1.047975	0.7212929	0	0.1416099	0.2926221	0.1255246	0.07609412	0.2989412	0.4106726	0.5608768	0.5302765	0.4018959	0.3024581	0.0324403	0.2781023	0.1145894	0.4449859	0.2486974	0.07565995	0.192731	0.3665905	0.03467487	0.02096	0.543441	0.1307986	0.05528805	0.4371561	0.05838202	0.1382998	0.05554401	0.5428736	1.791347	0	0.1227366	3.264627	1.218375	0.8270181	2.096651	0.1313596	0.1450248
TCGA-CK-5916	1.76164383561644	1	0.02496546	0.05853971	1.716809	0.01265645	0.04600682	1.530882	1.162604	1.112166	0.3827371	0.03728371	0.08349106	0.776365	0.1752807	0.2691837	0.1269009	2.303659	0.6696361	0.07034468	0.2132566	0.713299	0.01147579	0.2674677	0.07296497	0.4359162	0.1729202	0.03441186	0	0.3359935	0.09813015	0.06228281	0.1478791	0.1388104	0	0.6185775	0.09293713	0.2935421	0.04912186	0.2304504	0.5910895	0.06334521	0.651273	0.05774325	1.235354	0.3230333	0.09889232	0.1858743	0.01865551
TCGA-NH-A50T	1.51506849315069	0	0.04868878	0	1.362271	0.04936635	0.0314036	2.007536	0.3803318	0.1196688	0.7165739	0.02908495	0.06513122	0.04037606	0.1695528	0.1399931	0.03299837	0.4371276	0.05804243	0.1097515	0.6503204	0.05564432	0.0447612	0.1942613	0.09486638	0.5478703	0.06389749	0.02386189	0	0.09656607	0.08612003	0.01041144	0.5306568	0.2761287	0.04577194	0.201063	0.07250008	0	0.02299192	0.08988697	0.2617098	0	0.2032227	0.0225227	0.06424651	0.3946378	0	0	0.167361
TCGA-WS-AB45	5.83561643835616	0	0.618620489	0.040293289	4.275390736	0.174230423	0.221667685	4.039591794	0.309765782	0.83590369	0.56200659	0.179638453	0.563181276	0.213750982	0.530846326	0.457026413	0.888025259	2.699847367	3.456863946	0.145256192	0.487062573	1.153776309	0.126381833	2.717060654	0.18414841	0.720939475	0.858212485	0.231595659	0	0.53556496	0.11820141	0.199037864	0.152679273	0.281855342	0.04038613	1.348275425	0.788954355	0.252558797	0.114957125	0.449425142	1.990271063	0.610413252	0.044827572	0.238470483	1.456852586	0.104880209	0.340341369	0.23988477	0.012840718
TCGA-AA-A00Z	1.83287671232877	0	0.1576763	0.1056353	2.965033	0.3425798	0.1349069	1.713716	0.3383753	0.2998834	0.04604345	0.06727872	0.1506602	0.1867942	0.1644735	0.4047865	0	0.4494021	0.4027877	0	0.1224437	0	0.144957	0.3495033	0.5266632	0.08740155	0.2791899	0.2897834	0.1845436	0.2552854	0.2766821	0.1284455	0.213479	2.442223	0.05293936	0.1860379	0.0559019	0	0.2127378	0.1386165	1.066625	0	0	0.2083962	0.356673	0.373946	0.08922595	0.08385286	0.08416001
TCGA-CM-6674	0.410958904109589	0	0.076878788	0.060089168	1.731997232	0.038974336	0.206607402	1.506824245	0.192480029	0.183706341	0.392867554	0	0.248532738	0.371893324	0.10075524	0.193415978	0.13025974	1.150362305	0.706453728	0.144413193	0.129350683	0.5491342	0.04711814	0.814174488	0.049930827	0.447454287	0.280258627	0.054946401	0.209950104	0.127063552	0.094432037	0.059364822	0.106255235	0.569938139	0.030113811	0.582037788	0.445186169	0.150655838	0.030253227	0.078850039	0.672327669	0.130043721	0.13370224	0.059271628	0.752377789	0.287789431	0.050754928	0.214643331	0.114895771
TCGA-AA-3833	1.32876712328767	0	0.318490866	0	4.656567846	0	0.180591027	2.022661993	1.177698184	0.200717135	0.250393621	0	0.262182645	0.203164905	0.357776083	0.193715375	0.249062625	0.244393969	1.058713246	0.414187017	0.30439934	0.979971896	0.090092054	0.760267947	0.095470041	0.641664908	0.178622469	0.060034314	0.401434271	0.242951366	0.457414628	0.06111984	0.174141347	0.626605088	0	0.303513563	0.121602352	0	0.019281854	0.226147361	1.222813112	0.248649586	0.639112106	0.169995125	1.196123524	0.610078243	0.194091521	0.045600882	0.018307167
TCGA-A6-A566	2.07671232876712	1	0.47529422	0	7.695239744	0.041306456	0.087588095	5.224434061	0.693591565	0.667538869	1.66550279	0.040560561	0.336067519	0.675679587	0.526293379	0.400217543	0.598234585	3.589857563	3.419856728	0.306108984	0.474544666	0.853589619	0.049937563	1.294338768	0.502726264	0.737689174	0.594057107	0.166383562	0.111256478	0.461714385	0.407002565	0.150032976	0.804380461	0.513435456	0.063831482	1.514124095	1.314369416	0.878188743	0.096190497	0.543193394	3.024026459	0.344562974	0.425107873	0.157045709	1.989015396	0.351424544	1.613759014	0.252763349	0.04566406
TCGA-CA-6715	1.04931506849315	0	0.125382	0	2.415905	0	0.1155282	1.442252	0.02690715	0.09171663	0.1098394	0.05349913	0.05391134	0.0742681	0.1509082	0.4441955	0.09104628	0.6253774	0.4003642	0.05046948	0.02781873	0.1023527	0.02470025	0.2448346	0.1395985	0.1042508	0.08488541	0.04663501	0.0733733	0.02537493	0.1320083	0.06383631	0.1379265	1.473945	0.315725	0.2219023	0.06667866	0.05265116	0.02819437	0.05511298	0.2177723	0	0	0.3521419	0.1654459	1.062613	0	0	0.06357676
TCGA-NH-A6GA	0.827397260273973	1	0.08556417	0	1.914201	0.008675492	0.1773891	2.519694	0.7712116	0.2015397	0.06996028	0.051113	0.5265142	0.03547783	0.4229207	0.5227916	0.0869855	0.3840973	0.8160159	0.1928739	0.1860459	0.3422567	0.1022606	0.5879476	0.6335181	0.1369515	0.09357625	0.09173095	0	0.2545534	0.7020713	0.1982147	0.2939591	1.02761	0	1.130694	0.06370471	0.2012114	0.154887	0.1316372	2.573366	0.08684124	0.4910639	0.07916141	0.7056553	0.4804537	0.1016801	0.1433356	0.2429646
TCGA-AA-A004	1.16164383561644	0	0.3881971	0	2.356911	0.05622849	0.3065901	1.171246	0.1666152	0.3407582	0	0	0.2596466	0	0.2180402	0.7574006	0	0.5532114	0.2479147	0	0.215325	0.4753434	0.1529496	0.7375484	0	0.1344885	0.1617323	0.01698675	0	0.3142548	0.2179802	0	0	0.7400277	0	0.2290116	0	0	0	0	4.258409	0	0	0.1282673	0.9147132	1.028963	0	0	0
TCGA-AD-6889	5.63287671232877	0	0.04409375	0	1.782888	0	0.6805255	1.272546	0.1987141	0.09031251	0.1577302	0	0.03686527	0	0.2043221	0.4833533	0.01867759	0.7147716	0.4599407	0.2484841	0.1027232	0.1259822	0.07093948	0.1628962	0	0.1015855	0.1285936	0.02363584	0	0.2186315	0.04332912	0.007857377	0.1567095	0.3677484	0.05181524	0.3186532	0	0	0.03470342	0.1695914	0.3103713	0.05593984	0.7476767	1.121841	0.4581928	0.4898016	0.2619939	0.02051808	0.0782543
TCGA-D5-6536	1.48767123287671	0	0.04698665	0.0550878	2.55857	0.8456196	13.17218	1.325024	0.4235027	0.2405943	0.09604486	0	0.1335653	0.04870567	0.1517493	0.1857612	0.2985447	1.171794	0.6826621	0.19859	0.2827784	0.4698665	0.06479457	0.6509378	0.2288748	0.3019613	0.085644	0.09714807	0	0.03328221	0.02308593	0.004186442	0.02783181	1.09072	0.1380368	0.2910509	0.1749138	0.2071746	0.06471541	0.1807179	1.172603	0.2384397	0.06128694	0.543383	0.4185033	0.1491247	0.1395914	0.04372845	1.088438
TCGA-G4-6322	2.16986301369863	0	0.02562361	0	2.178007	0.008660066	0.543026	1.482069	0.7185176	0.5510619	0	0	0.02856402	0.141659	0.3454107	0.5034434	0.05788722	1.278048	0.4836479	0.1443982	0.1392863	0.2196309	0.07066988	1.672356	0.6323916	0.2899866	0.1556831	0.02092979	0.06997611	0.08470026	0.08812743	0.05174858	0.09106648	0.4796482	0.08029517	0.5996131	0	0.1506402	0.0470557	0.1314031	0.1748964	0	0.2673768	1.086534	0.55225	0.09174944	0.1014993	0.7948929	0.04467706
TCGA-AA-A029	4.33150684931507	0	0.03915396	0	0.9938037	0	0.01803841	0.6765805	0	0.1202923	0	0	0.02618823	0	0.3298765	0.225156	0	0.1952912	0.4084139	0	0.3648607	0	0	0.289294	0	0.2088956	0.02854685	0.03597932	0	0.05546812	0.1346625	0.01395424	0.1391535	0.8490295	0.09202084	0.1616884	0	0	0	0	0.4008737	0	0	0	0.4391525	0.4588267	0	0	0.02925791
TCGA-AZ-5407	5.11780821917808	0	0.1871763	0	1.515237	0.0271116	0.5974715	1.610786	0.1205049	0.1779947	0.6012363	0	0.06259668	0.2771775	0.2778491	0.2690907	0	0.3334262	0.2988415	0	0.2387926	0.5729888	0.03687373	0.3062304	0.2083994	0.1945383	0.1754599	0.05323806	0.3286056	0.9470232	0.0985342	0.138182	0.1583871	1.984799	0.1256879	0.4968996	0	0.393001	0.4103767	0.2056883	0.6844233	0.06784643	0.1395103	0.4329249	0.8997333	0.3786279	0	0.04977056	0.03496701
TCGA-AA-A00N	0.334246575342466	1	0.326982567	0.12778629	3.072084474	0	0.238517094	2.145005638	0.491196197	0.251146249	0.501285899	0.081386583	0.018225258	0	0.168352808	0.352560484	0.184674539	1.630915492	0.690269991	0.307110698	0.190439028	0.311411968	0.250504896	0.805317441	0.265458626	0.237890312	0.178800331	0.150235233	0	0.115806326	0.629236683	0.048556111	0.29052458	0.545416546	0.128080729	0.787670556	0.540993054	0	0.085782463	0.167683368	1.56927016	0.829657259	0	0.315119254	1.006750982	0.199570499	0.323807979	0.253590494	0.050903879
TCGA-D5-6540	1.34520547945205	0	0.077207688	0.103450695	4.518334839	0.022366328	0.106709813	2.880067358	0.762168046	0.293681567	1.4203739	0.065887339	0.132789991	0.091465554	0.315949019	0.919683243	0.205569592	0.440108093	0.821786933	0.372936899	0.813684809	0.189080052	0.121679277	0.407470595	0.386828531	0.203285781	0.144749633	0.020270744	0	0.234380482	0.081288028	0.039309095	0.091465554	0.60099525	0.155533591	0.409928616	0.054745806	0	0.034723034	0.033937445	1.185724092	0.167914375	0.115092206	0.051021601	0.545776024	0.527776824	0.043690342	0.061589032	0.074177559
TCGA-AA-3548	2.83287671232877	0	0.33918292	0.244715528	2.772168092	0	0.673133499	1.703220076	0	0.400795387	0.213329168	0	0.104706152	0.432728678	0.205164863	0.637657269	0.132621995	1.041088066	1.43853047	0.14703212	0.202609925	0.521819876	0	0.751828855	0.305017922	0.088582832	0.152181922	0.095902031	0	0.258735689	0.294843312	0.148778833	0.370910295	2.32109577	0.061319847	0.538720925	0.259005486	0.460163925	0.143742049	0.160559962	1.10191073	0	0	0	1.170550667	0.471361468	0	0.097127057	0.087734551
TCGA-A6-6649	0.898630136986301	0	0.197595	0.3564048	1.745053	0.1232891	0.262595	2.462338	0.981819	0.3813638	0.04660403	0.1588949	0.2287417	0.2520912	0.2902658	0.5954521	0.0772605	0.9855594	1.823288	0.1284829	0.2360656	0.3908472	0.1117881	0.5334454	0.2961529	0.5787129	0.277048	0.1629508	0.06226348	0.4198893	0.8438861	0.2464759	0.2070749	1.838122	0.2143356	0.2824544	0.1320258	0.2680739	0.1914026	0.3273763	0.7780982	0.2313971	0.3965117	1.124978	1.108117	0.8720315	0.03010409	0.1980388	0.2725909
TCGA-DM-A282	11.5972602739726	0	0.07106523	0	2.695174	0.4773592	0.184163	1.643739	0	0.1546525	0.0363159	0.02653241	0.03564912	0	0.2345035	0.2043313	0.01505119	0.9304507	0.3176912	0	0	0.07614132	0.0734992	0.4922574	0.5538609	0.08186188	0.1036262	0.06258222	0	0.03775341	0.2007696	0.006331808	0.1262832	0.7112334	0.06263238	0.2934678	0.1322747	0.1044475	0.006991371	0.1093311	0.4774835	0.04507869	0.04634689	0.4520136	0.2344325	0.1821706	0.07037528	0	0.02987083
TCGA-AA-3655	5.08493150684932	0	0.1285777	0	2.573584	0	0.2315603	1.677589	0.351183	0.3830575	0.1672518	0.03491263	0.09381768	0.2423306	0.2429177	0.1932497	0.03961018	0.9328245	0.4702877	0.06587107	0.2632335	0.3339682	0.05372989	0.1813661	0.3416236	0.3515003	0.2130569	0.1861797	0	0.2152703	0.304384	0.05415605	0.0692373	1.039862	0.192301	0.434429	0.1160357	0.06871852	0.04599793	0.1078974	0.7629308	0.05931673	0.121971	0.8381011	0.5706838	0.4965398	0	0	0.03930548
TCGA-G4-6311	3.28493150684932	0	0.1867648	1.284598	5.093232	0.08836983	0.1491419	2.773084	0.1870399	0.2677712	0.9671348	0.03718889	0.657902	1.239025	0.3286896	0.5369982	0.1687709	0.5589245	0.9462386	0.2104973	0.2900649	0.142297	0.08012623	0.8647596	0.242598	0.5797435	0.2904934	0.1106007	0.3060243	0.3880558	0.2263489	0.06656188	0.295006	1.481494	0.05852538	0.6170044	0.2781023	0.07319889	0.4017749	0.1532429	0.7808034	0.06318411	0	0.2303856	0.9364817	0.4620395	0.1479612	0.09270078	0.2046888
TCGA-G4-6297	6.86575342465753	0	0.1217332	0.1037976	2.397392	0.5498127	0.07137844	2.536478	0.3324887	0.2039998	0.6107731	0.09916244	0.3256863	0.3670891	0.2921451	0.3738799	0.206259	0.82797	1.005942	0.06236459	0.1289074	0.1264761	0.05086972	1.005739	0.2803131	0.4562431	0.2420584	0.1050834	0.0906666	0.3135553	0.2120576	0.1104346	0.1704342	0.8060653	0.1560552	0.2742022	0.3021117	0.06506047	0.07838883	0.3745638	0.6515026	0.336955	0.05773909	0.3071562	0.7374431	1.080708	0.1315106	0.1647882	0.05375234
TCGA-5M-AAT6	0.794520547945205	1	0.277352	0.07226028	5.429871	0.03124575	0.1774685	3.801571	0.7406945	1.025682	0.5669319	0.1840892	0.1752016	0.8944413	0.2336721	0.4430334	0.5743612	3.765838	1.745015	0.6078248	0.8974084	0.8364583	0.2124824	1.03601	0.3602662	0.8370235	0.3145569	0.1415911	0.5049514	0.938631	0.7570622	0.516199	0.2007929	0.942397	0.1086402	1.2726	1.376638	0.3623426	0.1697782	0.4741059	2.918518	0	0.1607838	0.4276629	2.704152	0.4589341	0.6713892	1.433997	0.08635501
TCGA-D5-6534	3.60547945205479	0	0.176350528	0.18795981	2.441519614	0.048764921	0.059087637	3.22048127	1.155994354	0.902999689	0.73733733	0.263363892	0.445002553	2.326575696	0.342177936	0.558912204	0.258054457	3.758277079	5.70963963	0.406553953	0.25521608	1.648991946	0.147386241	2.197312127	0.593500603	0.57929696	0.683789458	0.265175732	0	1.078810992	1.429662514	0.505659174	0.303879275	0.815619551	0.113035738	0.959964778	0.97478427	0.329877591	0.239735776	0.764596693	2.964788896	0.854235255	0.083644519	0.407885574	3.940043686	1.268121379	0.635048678	0.507285691	0.04492446
TCGA-DM-A1DB	3.69315068493151	1	0.1041018	0	1.552611	0	0.3676947	1.009371	0.04170204	0.120825	0.01418622	0.1451024	0.06498683	0.1726566	0.3742161	0.4739236	0.1411081	0.8307781	0.3516192	0.1564403	0.7383421	0.218118	0.1914084	0.2563898	0.2569236	0.1245459	0.02023995	0.3932734	0.1705764	0.2851232	0.01022966	0.2127139	0.0739957	4.838903	0.7176787	0.1719576	0.01722365	0	0.1310911	0.2776048	0.2664588	0.03521852	0.03620932	0.2889356	0.6318831	0.5828505	0.02749096	0.1291774	0.04926722
TCGA-CM-6678	0.334246575342466	0	0.1339584	0	2.583041	0.633839	0.1193162	2.612725	0.187818	0.1371863	0.09127427	0.106696	0.03583937	0.1110875	0.1404498	0.1797441	0.07565758	0.7572417	0.5988499	0	0.07628542	0.1786112	0.1395727	0.3563168	0.3480104	0.5024555	0.06511203	0.07112267	0	0.1138647	0.1974532	0.0286452	0.08463807	0.486617	0.167911	0.1843962	0.1329806	0.05250243	0.01405736	0.0549573	0.6286129	0	0.04659423	1.487212	0.2121153	0.5014623	0.2122526	0.03324515	0.1034375
TCGA-AA-3660	6.50684931506849	0	0.1718819	0.05373778	1.8533	0.02323652	0.9977533	1.548312	0	0.129084	0.1171139	0.03422538	0.04598545	0.1900482	0.1673387	0.5848102	0	0.6286926	0.3244286	0.06457441	0.3648319	0.163697	0.03160334	0.5333879	0.08930634	0.2389836	0.1086087	0.035099	0.1877585	0.227266	0.669975	0.06534154	0.1357487	1.197786	0.1615848	0.3785576	0.1137515	0.2694632	0.07214795	0.07051564	0.8652322	0	0	0.2385299	0.6652918	0.6266407	0.09078033	0.06398522	0.02996915
TCGA-DM-A0XF	3.18356164383562	1	0.03057187	0	2.742976	0	0.1690152	1.915022	0.1148133	0.08609848	0.7030304	0.04565637	0.05623218	0.2535228	0.2876213	0.2527188	0.07769926	0.6480637	0.3188943	0.2153543	0.07122186	0.08734819	0.04918502	0.4461211	0.3871852	0.1334521	0.1504555	0.05618613	0	0.2165507	0.5107092	0.05992598	0.0633807	1.253621	0.3053664	0.1893723	0.1707115	0	0.03609179	0.09406728	0.9488019	0	0.03987635	0.03535522	0.4235766	0.459017	0.09082515	0.04267788	0.09709087
[truncated: 5 more columns]
