# Supplementary material for: A Novel Prognostic Chemokine-Related lncRNAs Signature Associated with Immune Landscape in Colon Adenocarcinoma
Source: Dis Markers. 2022 Nov 3;2022:2823042. doi: 10.1155/2022/2823042 (PMC9649319; doi:10.1155/2022/2823042)
Supplement: Supplementary Materials — Supplementary Figure S1: (A) Heatmap of the expression of prognostic chemokine-related lncRNAs between tumor tissues and normal tissues. (B) Boxplot of the expression of prognostic chemokine-related prognostic lncRNAs in COAD tissues and normal tissues. (C) Barplot showed the proportion of 22 kinds of TIICs in each COAD sample. (D) Correlation between 22 kinds of TIICs was visualized. ∗p < 0.05; ∗∗p < 0.01; ∗∗∗p < 0.001. Supplementary Figure S2: Survival analysis was conducted in high-risk and low-risk patients with different clinical parameters. Supplementary Figure S3: Risk stratification showed the differences in drug susceptibility between high-risk and low-risk groups. Supplementary Table S1: Clinical information of the COAD patients. Supplementary Table S2: The 64 chemokine genes. Supplementary Table S3: Expression of 52 chemokine-related lncRNAs in COAD. Supplementary Table S4: Immune cell content of COAD samples was calculated using the CIBERSORT algorithm. Supplementary Table S5: Immune, Stromal, and ESTIMATE scores for COAD samples. Supplementary Table S6: Expression of 10 chemokine-related lncRNAs and risk score in the entire cohort. Supplementary Table S7: The immune cell infiltration status in all tumor samples in RNA-seq. Supplementary Table S8: Tumor mutation burden data of the low-risk group. Supplementary Table S9: Tumor mutation burden data of the high-risk group. Supplementary Table S10. The immunotherapy score data was obtained from the TCIA database. Supplementary Table S11: Quantitative real-time PCR primer sequences of model lncRNAs. Supplementary Table S12: The correlation values of immune cell infiltration and patient risk score. Supplementary Table S13: The correlation values of chemokine-related lncRNAs and immune cells. [file 2823042.f1.zip › Supplementary Table 4 (1).txt]

Mixture	B cells naive	B cells memory	Plasma cells	T cells CD8	T cells CD4 naive	T cells CD4 memory resting	T cells CD4 memory activated	T cells follicular helper	T cells regulatory (Tregs)	T cells gamma delta	NK cells resting	NK cells activated	Monocytes	Macrophages M0	Macrophages M1	Macrophages M2	Dendritic cells resting	Dendritic cells activated	Mast cells resting	Mast cells activated	Eosinophils	Neutrophils	P-value	Correlation	RMSE
TCGA-A6-2682-11A-01R-A32Z-07	0.151273776135719	0	0.0726950503540222	0.0793755584230692	0	0.167429318764483	0	0.0168018630928235	0.0299548608636659	0	0	0.0511851337901102	0	0.0187828417175182	0.0134163258985729	0.154578741261232	0.0392811077080338	0	0.12650731825879	0	0.0787181037319603	0	0.00700000000000001	0.317346874856792	0.951473673167714
TCGA-AA-3522-11A-01R-A32Z-07	0.0367462234380999	0	0.0651476105119445	0.0790109986925859	0	0.154816830250445	0	0.00655102793022599	0.08440416012684	0	0	0.0233687906448663	0	0	0.020671209886088	0.223691992027159	0.0999023712004786	0	0.171949801121352	0	0.0337389841699152	0	0.037	0.18129326425003	1.00286266008529
TCGA-A6-5667-11A-01R-1723-07	0.0691675069108126	0.0498124052474965	0.0193729330368044	0.107628426670099	0	0.270517034497277	0	0.039403230275622	0.0212643586935857	0	0	0.0215043733694995	0.015581590893451	0	0.011030760199648	0.171867698391145	0.0921370275459106	0.00550305228912457	0.000293847862656121	0.104915754116869	0	0	0.024	0.209058398233139	1.00059113840489
TCGA-AZ-6603-11A-02R-1839-07	0.00815178983536479	0	0	0.139574768306333	0	0.133510740780273	0.0281662860747011	0.00989340077058577	0.0204715165921912	0	0.00975140432274203	0	0.0979044622533257	0	0.158814777560533	0.30348551512579	0.00345247931007709	0	0.0868228590680828	0	0	0	0.193	0.0630371216580061	1.06625036479198
TCGA-AA-3713-11A-01R-1723-07	0.106778958945703	0	0.030334758961645	0.137723550704347	0	0.188736704066813	0.00889190227535952	0.00692947888362655	0	0	0	0.0388764826847056	0.023397869164624	0	0.0224690763324985	0.15384987989595	0.0960924600048943	0	0.112845996523964	0	0.0730728815558699	0	0.026	0.2038243456258	0.994583011104707
TCGA-A6-5665-11A-01R-1653-07	0.0724354636631995	0.0287663709816738	0.05702389759178	0.111621740497059	0	0.26091413204633	0.0289642927100494	0	0.0114673596640686	0	0.0206736957305177	0	0	0.00555926274212592	0.0243655359015437	0.200585596491957	0.0294685869236532	0.018878248851452	0.083649953408369	0	0.0456258627962213	0	0.018	0.226155711020039	0.988423947850057
TCGA-AA-3514-11A-01R-A32Z-07	0.0298548204603989	0	0	0.0703501364479994	0	0.194822468590158	0.018800202188456	0	0.00753827426278044	0.0446112081387499	0	0.0908778412479193	0	0.0339303386137182	0.185106770428364	0.102617414820273	0.0281350645984019	0	0.1772728415674	0	0.0160826186353818	0	0.102	0.103525148556447	1.06089677246161
TCGA-A6-2684-11A-01R-A32Z-07	0.0206264468097161	0.00591730826056148	0.0838101751177582	0.0604054427255682	0	0.214431708488276	0	0.0413351657665072	0.0475663258510921	0.0158107615572449	0	0.0676835580561871	0	0.0442857967741176	0.0223603536943657	0.163218763237971	0.0491573634905923	0.002602846546191	0.125822925551473	0	0.0349650580723785	0	0.037	0.181893887173929	1.00618035404815
TCGA-AA-3531-11A-01R-A32Z-07	0.163842560234174	0.00442408094466937	0.0595381792721681	0.0535743530483741	0	0.136820115147327	0	0.0834436933028372	0.0448214036736391	0.00554636984999481	0	0.0652100673856162	0.000548286384554132	0.0575288788843943	0.0302057332710343	0.113102974264477	0.0570257929908458	0.0016095240937675	0.112543000406872	0	0.0102149868452554	0	0.016	0.236176842775622	0.986635623632267
TCGA-AA-3660-11A-01R-1723-07	0.0351500697655783	0	0.0183077927045059	0.167441345523191	0	0.205543568761188	0	0.0140232170656364	0.0886717472057951	0	0	0	0	0	0.0327787777082268	0.148709734329517	0.145872038503517	0	0.116411997351542	0	0.0270897110813008	0	0.096	0.107050358866883	1.03890120213479
TCGA-AA-3663-11A-01R-1723-07	0.045655133317036	0	0.0385091781611032	0.0763230206529611	0	0.262506899243976	0	0.012129654635275	0.0544295104215594	0	0	0.0299886018849928	0.0629569893047632	0.00898537713322688	0.0116196894924024	0.188955700440969	0.0321997779769977	0.000489669706351035	0.154208631517612	0	0.0210421661107742	0	0.0580000000000001	0.146583469384819	1.01956535363077
TCGA-A6-2675-11A-01R-1723-07	0.0974057216502862	0	0.0476227028187925	0.132815583244836	0	0.299764553606421	0	0	0.0149801774413423	0	0	0.0423339992885713	0.0451303302661835	0	0.017881657691906	0.212861939808733	0	0.0144776872079089	0.0739105882738702	0	0.000815058701148116	0	0.035	0.188250035010921	1.01025196371193
TCGA-AA-3525-11A-01R-A32Z-07	0.102743791461424	0.0157303650816248	0.076970917026801	0.189072776769825	0	0.135251165456848	0.0121196054051929	0.0688894643096314	0.0698048250488405	0	0	0.0227155072354093	0.014536676611487	0.0389045438371379	0.0490394889826007	0.0958607580681457	0.0524519189588373	0	0.0510490363308801	0	0.00485915941531471	0	0.01	0.271048803725259	0.976562781582584
TCGA-AA-3496-11A-01R-1839-07	0.0280715401296306	0	0.0373996548115791	0.0826570532310558	0	0.119923780955651	0	0.0349272998954796	0.00172451685622376	0	0	0.0127678510105477	0.0698957207849176	0	0.0313156039452486	0.239073356399328	0.133141926244489	0	0.172833109728226	0	0.0362685860076234	0	0.082	0.11713525384017	1.02460535994217
TCGA-AA-3489-11A-01R-1839-07	0.0119930889046594	0	0.011834215706783	0.0755753402537643	0	0.187241940334446	0.0207083837242308	0.015664225029791	0	0	0	0.013018751470834	0.0425774760678363	0	0.232700014072291	0.166493345868165	0.0926070849919003	0	0.104216851917812	0	0.0225073174041464	0.00286196425334059	0.05	0.161949575519345	1.034264273511
TCGA-AA-3527-11A-01R-A32Z-07	0.0193957580078524	0	0.0607190766872168	0.101990493537717	0	0.17730051276773	0	0.0349958279288645	0.0280909933046895	0.00601468410527819	0	0.044811549460663	0.0214325285313274	0.0759461047122746	0.0835655254682078	0.153585572964933	0.0784070216765529	0	0.112051321310873	0	0.00169302953582012	0	0.0610000000000001	0.143644037755615	1.01940528148105
TCGA-AZ-6600-11A-01R-1774-07	0.231613512621517	0	0.216134203544046	0.0207489914200851	0	0.220104744747508	0	0.0190047567995949	0.0131219174500439	0	4.80446653592463e-05	0.00801987591872091	0	0	0.0374810752272518	0.100529104596226	0	0.0121135256136183	0.103862023550912	0.0172182238451166	0	0	0.001	0.488301645964046	0.874177518910765
TCGA-AA-3517-11A-01R-A32Z-07	0.279861106183576	0	0.125113036856969	0.0920318293993173	0	0.117756232714715	0	0.0117197765562707	0.0920244868630066	0	0	0.0339818297780827	0	0.0386902470153259	0.010542326104187	0.0919178492563886	0.0557369169284114	0.0016328924273225	0.048991469916428	0	0	0	0.001	0.515812205361292	0.855912355345333
TCGA-A6-5659-11A-01R-1653-07	0.021900166947582	0.0574120704363212	0.172730309863698	0.0514554420945416	0	0.176606667472252	0.0121083121687505	0.00884216816217078	0.0203883399191703	0	0.00707896514675268	0	0.00581530028318646	0.0414631493912097	0.0231159762187153	0.115681356634332	0.0825528471418606	0	0.145679151580334	0	0.0506120316261656	0.00655774491295836	0.005	0.379865931295063	0.925264252413892
TCGA-AZ-6605-11A-01R-1839-07	0.0379110443317928	0	0.00312961691002243	0.0933622338085509	0	0.30419349032004	0	0	0	0	0	0.0284572063074897	0.0755001468608682	0	0.0173764427043118	0.2566799289144	0.000671494431627525	0	0.182718395410897	0	0	0	0.129	0.0863719182274951	1.04789010722668
TCGA-A6-2680-11A-01R-A32Z-07	0.01922026750432	0	0.0102966945753679	0.13339323582205	0	0.238180669846689	0	0.00134205717237058	0.0645541434910588	0	0.0399920277796974	0.0138522042284207	0.00671701391131553	0	0.0229378822182796	0.233636712393147	0.0380514324621871	0	0.138877694330509	0	0.0389479642645864	0	0.694	-0.00795086509982394	1.08537313707268
TCGA-AA-3516-11A-01R-A32Z-07	0.0166682855695521	0	0.0580010676651882	0.320916666053042	0	0.117571388504905	0.0196955313877217	0.0703876368587823	0.0562870687997093	0	0	0.00584469850139417	0.00342396113794959	0	0.0497325180957018	0.167344057538871	0.0617838275984683	0	0.0454879174989066	0	0.00685537478980797	0	0.0570000000000001	0.14719269733447	1.03785363867948
TCGA-AZ-6599-11A-01R-1774-07	0.0266702275986135	0	0.0825168323916061	0.0296961086374418	0	0.264240685963696	0	0	0.0231564354997795	0.004737998789627	0	0.0397960885264079	0.00670471473916275	0.0457633280341802	0.0291358318396522	0.22742604090156	0.0170289526971564	0	0.203126754381117	0	0	0	0.052	0.158260842499373	1.0153084724858
TCGA-AA-3712-11A-01R-1723-07	0.00981551582861158	0	0.110948317402406	0.0539731551215304	0	0.24808079162784	0	0	0.0105385677543749	0	0.00553035481261964	0.00768557350778522	0	0	0.0101000161867001	0.285231145424109	0.0669973813063836	0	0.144474224865533	0	0.0466249561621063	0	0.013	0.250317419925817	0.978078487916877
TCGA-AA-3697-11A-01R-1723-07	0.0916532025676666	0	0.0249783327845781	0.0964771668421854	0	0.0605477346632229	0.0075863180726438	0.054782301191838	0.0385912629324683	0	0	0.0305553876758842	0.033618181353141	0.222818618610074	0.0162679341996948	0.226536256455327	0.0133936677420509	0.0246517385325093	0.0575418963767154	0	0	0	0.036	0.184533796497253	1.01030849999425
TCGA-AA-3655-11A-01R-1723-07	0.0348591816729916	0	0.0376474401054315	0.203707693408845	0	0.103771457664062	0.0139780680341128	0.0315738054126079	0.0452985013117973	0	0	0.00491398393073063	0.00650823108669526	0	0.0251935862804389	0.204822429176563	0.111821592142791	0	0.142694565032829	0	0.033209464740104	0	0.051	0.160650467373778	1.01201472248459
TCGA-AZ-6601-11A-01R-1774-07	0.125756388711208	0	0.0855596705869497	0.173991425068314	0	0.158367043179586	0	0.0715657086424331	0.0579296463971148	0	0	0.00633807609061972	0.0102953313106888	0	0.00629317303807928	0.194796230047704	0.0668103326233824	0.00789617301021318	0.0344008012937073	0	0	0	0.00700000000000001	0.315801688268902	0.956706851121053
TCGA-AA-3518-11A-01R-1672-07	0.0353293188025539	0	0.0765968865314123	0.185793116924188	0	0.180009132487761	0	0.0153563553625611	0.0474706917769317	0	0.00823485327796632	0.0135783974866212	0	0.0110588230848588	0.0415412638743124	0.212419193027414	0.0304935447535625	0	0.129451880120835	0	0.012666542489021	0	0.04	0.173017787939897	1.01238414150485
TCGA-A6-2671-11A-01R-A32Z-07	0.0214747835219829	0	0.09524747852237	0.20218183541934	0	0.188199147036105	0	0.00967987511708077	0.0501710903670285	0	0	0.0150079746741386	0.00181179322801804	0	0.0192634094182903	0.168417639293387	0.127523592128027	0	0.101021381274232	0	0	0	0.028	0.198734016234429	1.00294551614477
TCGA-AA-3534-11A-01R-A32Z-07	0.160440900059225	0	0.0559925080338784	0.0755430993936065	0	0.205540072870076	0	0.0200760411739022	0.0795590213246714	0	0	0.048521201080828	0	0.0698657940263158	0.0111462621507266	0.168270328028733	0.00752106326918955	0	0.0897733798556482	0	0.00775032873320004	0	0.00700000000000001	0.294627942143959	0.963934546143365
TCGA-AZ-6598-11A-01R-1774-07	0.22665162249271	0	0	0.152856723116032	0	0.259212298014307	0	0.0343288849677237	0.0013420448695736	0	0	0.0562721054729232	0	0.0568315405221521	0.0449212061208583	0.120266491440379	0	0	0.0415906353534205	0	0.00572644762992061	0	0.00700000000000001	0.306621399105492	0.965284407307551
TCGA-A6-2678-11A-01R-A32Z-07	0.0303453350535807	0	0.0917375202235168	0.126748520428357	0	0.203519049807202	0	0	0.00782124106567093	0	0.00826194487262374	0	0.00682040947207687	0	0.00874138567335223	0.30807517584414	0.0453567846397102	0	0.126147530973252	0	0.0364251019465173	0	0.017	0.235502734545718	0.984606499701498
TCGA-A6-2679-11A-01R-A32Z-07	0.0259687792232169	0	0.0408355369618985	0.39198940720168	0	0.0448248662505374	0.0538587962243511	0.0560688613883807	0.0476667972476692	0	0.00358134906416725	0	0.00698012307083261	0.0438007146511648	0.0691190640679618	0.137906699104145	0.0239384941575592	0	0.0360328330537808	0	0.0174276783326544	0	0.0669999999999999	0.138786077230483	1.04357006289382
TCGA-A6-2686-11A-01R-A32Z-07	0.0175241945686191	0	0.0780024942016412	0.101940431242009	0	0.240374823338626	0	0.0103226509156117	0.0549016606346789	0	0.0285409329113904	0.00558162185834362	0.00281964109841928	0.0569772455491827	0.0289092210886813	0.188590088865722	0.0171690828760543	0	0.128775689216141	0	0.0359277662360842	0.00364245539879471	0.038	0.177572419339337	1.00826241236724
TCGA-F4-6704-11A-01R-1839-07	0.106124051083079	0	0	0.105476718912168	0	0.328019244356952	0	0.0145411924193077	2.81875209543733e-05	0	0	0.0132180566886788	0	0.0154292603914179	0.0141678763969818	0.207343790524003	0	0.00695682513972997	0.141134737602729	0	0	0.0475600589639988	0.0649999999999999	0.141035845944816	1.02865252957584
TCGA-A6-2685-11A-01R-A32Z-07	0.0138209085475306	0	0.0304080760718601	0.317999252582241	0	0.180871145115415	0.0640390823272096	0.0212701199610906	0.0458264780199757	0.00952794814873714	0	0	0	0	0.0299379939215086	0.102514651457732	0.0976312042199619	0	0.0665113611186174	0	0.0196417785081214	0	0.088	0.112267035460352	1.05465510146619
TCGA-A6-2683-11A-01R-A32Z-07	0.0120543855776649	0	0.148122038532142	0.0669866194251967	0	0.324700441746576	0	0	0.0288547751456855	0	0	0	0	0	0.0103585995426374	0.19125200738712	0.0191924963621961	0	0.144521618619809	0	0.0521043274051845	0.00185269025578869	0.01	0.271738123355713	0.974020542084132
TCGA-A6-5662-11A-01R-1653-07	0.127949577365813	0	0.0452317551255847	0.123560843869646	0	0.227712818240979	0.00912142315812545	0.0270031828109645	0.0221022267154623	0	0	0	0.00452516768119714	0.0137711973016796	0.00730445174585765	0.143286051531625	0.095516732395967	0.0015127795066246	0.0788692157196225	0	0	0.0725325768308507	0.018	0.22730297261062	0.989359072336719
TCGA-AA-3511-11A-01R-1839-07	0.206107829952271	0.0874895642646582	0.0388815397699652	0.112952815122503	0	0.151760135385536	0.00190909126618142	0.0415949837397985	0.0618817675821567	0	0	0.0164707953580679	0	0.0465450647766514	0.0045984274063461	0.131000637701713	0	0	0.0988073476741507	0	0	0	0.002	0.450457556488516	0.892233611724672
TCGA-AA-3662-11A-01R-1723-07	0.0240704762519935	0.0230364420021266	0.00791052687118253	0.177776743358848	0	0.096685725240667	0	0.0125726521882813	0.0269906213332992	0	0	0.000549548059790874	0.00264215312049761	0	0.0191469936819701	0.396180232958244	0.020916271260984	0	0.180373143742562	0	0.0111484699295531	0	0.073	0.124359618602561	1.03323158142885
TCGA-AA-3520-11A-01R-A32Z-07	0.022648423167014	0.0229766914463478	0.0891649571304769	0.115108846722992	0	0.137840839944491	0	0.0436996543280474	0.0429232628275798	0.01224421729774	0	0.0267656256706718	0	0	0.0594187409845769	0.183030804561232	0.0659397013017446	0	0.13982532550385	0	0.0384129091132356	0	0.017	0.230263598818691	0.985067855223735
TCGA-D5-6532-01A-11R-1723-07	0	0.021415470309247	0.0399428659197335	0.103301827778027	0	0.214293587679036	0.129144224841692	0.000298142271147781	0	0	0.0466052802769724	0	0.0132994951155458	0.121817341025347	0.143956017790425	0.0971471944754178	0.0166866105616211	0	0.0488330886814117	0	0	0.00325885327437597	0.143	0.0808707769981523	1.05459753919719
TCGA-DM-A0XD-01A-12R-A155-07	0.0151695119307737	0.0894346638081273	0	0.110099313189326	0	0.0155049365335606	0	0	0.0271250090826622	0	0.0521381640983367	0.03529863753732	0	0.347224621286849	0.0267693414432013	0.12888012633503	0.00897285743245556	0.0418276458887845	0.0413609167998102	0.042391776958387	0	0.0178024776753766	0.317	0.0367735971584411	1.09002349319066
TCGA-AA-3492-01A-01R-1410-07	0.0409069824231768	0	0.0103293977020965	0.151988557984832	0	0.180751004991612	0.0713253242015069	0.014060535845808	0	0	0.0594703874166087	0	0.00509086785448425	0.125624279198865	0.0922116349807719	0.132387544236822	0.0534820703389406	0	0	0.0509597688378726	0	0.011411643986603	0.0649999999999999	0.140588088273746	1.02906551624259
TCGA-AA-A022-01A-21R-A16W-07	0.00378876652544053	0	0.00605318687018911	0.474699828635319	0	0	0.210059254335995	0.0287152515033515	0.00192758643012058	0	0.0536908483886895	0	0.0116571498427884	0.0442897819918608	0.0758032055172339	0.0486241041931911	0.00441089567567548	0	0.0362801400901451	0	0	0	0.052	0.158485198963605	1.05455193210878
TCGA-AD-6899-01A-11R-1928-07	0.0691800764582292	0	0.00748493524745137	0.0716848585470057	0	0.266082039408373	0.0101311416281747	0.00519307047857615	0.0150925077634353	0	0	0	0	0.289129351881279	0.101250763664645	0.153293575536831	0.00240415972944162	0	0.00872194491277831	0	0.00035157474377975	0	0.0600000000000001	0.145109904765626	1.04159403409087
TCGA-AA-3844-01A-01R-1022-07	0.0178830983671541	0	0.000821070333680788	0.0335796453084036	0	0.416977465728863	0.0869036820749959	0.0353145529660722	0.0038026877485172	0.017830854043465	0.0390674111579625	0	0	0.108364790168323	0.0271572215502403	0.0717273871214364	0.020842687785623	0.0243720763860021	0	0.0953553692592617	0	0	0.182	0.0682615079982782	1.07278981224447
TCGA-AD-6901-01A-11R-1928-07	0.00651206881571163	0.000575418078688466	0	0.0640065397801074	0	0.111719480667681	0.0059290290839493	0.0259327687586203	0.0106145652374577	0	0	0.059093715636279	0	0.3537232320021	0.136417786680977	0.147944115263121	0.0168758638906456	0	0.0606554161046617	0	0	0	0.00700000000000001	0.300558368478494	0.975058063054762
TCGA-AA-A01P-01A-21R-A083-07	0.0680699442097278	0	0.0741651760581605	0.232240615491538	0	0.0731215111871036	0.111645056950892	0.0190007010483753	0.0351941254182009	0	0.0185552322382841	0.0207185909547382	0	0.126548069905031	0.0925539554767479	0.107312117927485	0	0	0	0	0	0.0208749031337157	0.017	0.232532656850191	0.993686599202496
TCGA-G4-6293-01A-11R-1723-07	0	0.0223274300894188	0.0580004676590269	0.14111210320003	0	0.268735274820219	0.166000721497142	0.00230423381919058	0.0359044826393746	0	0.00594893913223174	0	0	0.16593211410717	0.0605614582709363	0.0398401024914103	0	0.00390277766928384	0.0137545767911212	0.0156753178134456	0	0	0.054	0.154317724484034	1.03025089834136
TCGA-AA-3715-01A-01R-0905-07	0.0441643242054999	0	0	0.126075701518274	0	0.114942410602237	0.0198660337982142	0.0127591939017701	0.036339168063298	0	0.03858923901966	0.0180030427937201	0	0.27800414496738	0.0662531249561845	0.133058536763545	0.000982514193839227	0	0	0.0867270486506882	0	0.024235516565689	0.034	0.191133337716916	1.01752718649162
TCGA-AY-A71X-01A-12R-A37K-07	0.0251327377546655	0	0.0280056575919198	0.043029998733121	0	0.255719557810549	0	0	0.0445007945610819	0	0	0.0764134374560452	0	0.33145200860775	0.0132663976095594	0.107139770128583	0	0	0	0.0753396397467251	0	0	0.4	0.0242944275140019	1.10111075702925
TCGA-DM-A28C-01A-11R-A32Y-07	0.000863822320113866	0.0354938689193103	0.00316492378999452	0.117178972778094	0	0.314848262440968	0	0	0.00948157446195072	0	0.027989701056509	0.0165689749253479	0.0652960923467486	0.285465136645722	0.0646397902250453	0	0.0243293476528457	0	0	0.0103236690788518	0.0243558633584986	0	0.365	0.0284839723521759	1.09187072025742
TCGA-AA-3560-01A-01R-0821-07	0.0404688968055523	0	0.00864281868939233	0.0467934903403158	0	0.377368933727323	0.105898200523961	0	0.00255824859834001	0	0.0421935969557369	0	0.0120895040070442	0.0768899351919853	0.040601304976571	0.121898027583782	0.0823313482536907	0	0.0205789384572334	0	0.00938739637913659	0.0122993595099351	0.106	0.100674755523187	1.04410588651875
TCGA-AA-3552-01A-01R-0821-07	0.157070486076916	0	0.145759208995708	0.0942403013451899	0	0.171046974768154	0.0267966386274851	0.0107801273965448	0.0564035506065681	0	0	0.0164226132499951	0.0267255174131415	0.0579173193283508	0.0724197323775899	0.112213510458615	0.0303788707274984	0	0.0218251486282438	0	0	0	0.003	0.400195790983275	0.917592529006954
TCGA-CM-6166-01A-11R-1653-07	0.0165363371714911	0	0.00307542631357956	0.0285195036164395	0	0.0751975550655136	0.119339854809451	0.0183565222041692	0.0392755956524996	0	0.0776357440078598	0	0	0.521205804598065	0.0104606461391653	0.0191919668620867	0.00436243245945812	0	0	0.0668426111002216	0	0	0.038	0.175371572302074	1.0536184062902
TCGA-AZ-5403-01A-01R-1653-07	0.0247651901935572	0	0	0.042878629244818	0	0.167250846703832	8.6695725270348e-05	0.00516457931159861	0.0103042445669601	0	0.0466997261363966	0	0	0.432452713714375	0.0226758603379409	0.139718588551007	0.0297627389208257	0	0	0.0593116571165696	0	0.0189285294768484	0.013	0.253683406846161	1.00574773912186
TCGA-G4-6299-01A-11R-1774-07	0.0216773991098891	0	0.0482504267550467	0.274647517579708	0	0.0714668430753417	0.0859569875196446	0.0199736236157626	0.0379465892084157	0	0.033687305934051	0	0.00641092132806432	0.174243476620092	0.0532909597840381	0.141799903701854	0.00651864830970632	0	0.0241293974583853	0	0	0	0.035	0.187598730617499	1.01313540926664
TCGA-AA-3496-01A-21R-1839-07	0.0494709108667047	0	0.0121055574870603	0.0825320319542509	0	0.233410489686227	0.145071739913708	0.0100107131997361	0	0	0.0263032522062357	0	0.00478057538836212	0.138122086409042	0.0659676791595666	0.144957255414344	0.0403672849462501	0	0.0314214849598332	0	0	0.0154789384086799	0.054	0.153817623325721	1.01798200466722
TCGA-A6-5661-01A-01R-1653-07	0.044700556936737	0	0.0544213394586069	0.0897525741609193	0	0.292557200419819	0.0998353157806525	0.076156576801798	0	0.00701493360320823	0.00669132796040969	0	0	0.118386321445986	0.0616140645116162	0.107345906427243	0.0143581822420051	0.0140798069716597	0.00668378970151746	0	0.00640210357782249	0	0.0590000000000001	0.146448911813716	1.03073825977442
TCGA-G4-6304-01A-11R-1928-07	0.00368493163462303	0	0	0.187466138808198	0	0	0.178774361212388	0	0	0	0	0.0485771570934977	0.00281155031601464	0.222544340580604	0.141917734764332	0.149664599547515	0.0281716240788328	0	0.0313503617723924	0	0.00503720019160264	0	0.036	0.1847567506284	1.02063935726386
TCGA-CM-5864-01A-01R-1653-07	0.0334276538764552	0	0.00366650754218151	0.0233674780787621	0	0.359376989537255	0.188264804027917	0	0	0	0.0394633634311044	0	0.00954224556224753	0.247090163353144	0.0660787981890946	0.0141172681452293	0.00910014074530874	0	0	0.0065045875113007	0	0	0.188	0.0649432051886215	1.07121713925961
TCGA-AY-A8YK-01A-11R-A41B-07	0	0.0374845331786151	0.0269268106972973	0.0281552415848103	0	0.293041282084587	0.0712800183962467	0.00122703806133763	0.0419187092673775	0	0.038370234283522	0	0	0.231431523824854	0.0163867720189639	0.137771821464837	0	0.0639196620555463	0.0120863530820056	0	0	0	0.135	0.0847026712299488	1.05563117078601
TCGA-DM-A28K-01A-21R-A32Y-07	0	0	0	0.0374637457372227	0	0.18784773974835	0	0.00653950322560429	0.0268908433920599	0	0	0.0516365340294531	0	0.488300623384315	0.0104242280980137	0.113702539139766	0	0	0	0.0656508734360565	0.0115433698091582	0	0.072	0.129836685903369	1.08257680277799
TCGA-CK-5913-01A-11R-1653-07	0.0123281737084891	0	0.00059898361464454	0.0737110326046139	0	0.153013519561944	0.0411811239268911	0.0746711400960793	0.042530208321154	0	0.0563638795531728	0	0	0.198503703872975	0.0611834002486672	0.0637577787447327	0.0361619639045978	0.0151352840287578	0	0.128983042422742	0	0.0418767653905395	0.036	0.184688558040077	1.01504263410773
TCGA-AZ-6605-01A-11R-1839-07	0.114261630760737	0	0.0166063226530283	0.0526293466955275	0	0.131469199680753	0.0155914615585406	0.0372839870095684	0.0510028172326507	0	0	0	0	0.352381619639109	0.0804643342433879	0.102752971903105	0	0	0.0347020614383483	0.0108542471852443	0	0	0.029	0.198157350096305	1.01639388068258
TCGA-CM-4751-01A-02R-1839-07	0.0735922045767563	0	0.0037176900052041	0.193018854236169	0	0.231466603675429	0.0588755446931348	0.0338881664565391	0.00932710374007267	0	0	0.0290339457605359	0.0125378331906768	0.0588979971746598	0.118617507749974	0.059831151204324	0.031102348211166	0	0.0860930493253589	0	0	0	0.0669999999999999	0.139571191023338	1.03795158915325
TCGA-CM-6677-01A-11R-1839-07	0.0522887253799725	0	0	0.110587808986457	0	0.164983311574444	0.135382976083767	0.00247623945935151	0	0	0	0.00680611805022687	0	0.207809655397751	0.0873103566873479	0.129988097438549	0.030707299239392	0	0.0716594117027406	0	0	0	0.143	0.0816949742551345	1.04897407152994
TCGA-G4-6627-01A-11R-1774-07	0.106168129484039	0	0.0503170239729008	0.175611589022802	0	0.217184074302274	0.0907845349490178	0.0166413172794462	0	0.00197288383404448	0	0	0	0.0557602969823938	0.098301565816985	0.0983100699498566	0.00664883297694364	0.0203014128742314	0.0340390242517445	0.0139942858318185	0.013964958471502	0	0.01	0.267767858421573	0.976970532318228
TCGA-A6-2677-01B-02R-A277-07	0.0494720377790097	0	0.00390564587035732	0	0	0.460906531014479	0.0563385302881617	0	0	0	0.0633528482013914	0	0.0131505340485963	0.107013168012679	0.0295633442602659	0.123503364796257	0.0340166018617131	0	0.00326715517253411	0.00482829631293281	0.0506819423816236	0	0.332	0.0341976250761517	1.07831781775974
TCGA-AA-3526-01A-02R-A32Z-07	0.0202685960495141	0	0.000707508564364446	0.155189726876425	0	0.109936140118157	0.142861794549159	0.0689130753540854	0	0	0.030146347882848	0	0	0.110666806431436	0.118428841551785	0.127220260917441	0.00847529190560869	0	0	0.0831515298779405	0.0240340799212358	0	0.011	0.26086022513788	0.980598497682749
TCGA-CA-5255-01A-11R-1839-07	0.181949963555626	0	0.0172872707856574	0.140838699365816	0	0.211569067781944	0	0.0315611733439396	0.00807568660866426	0	0	0.00259204228515475	0.00209085585072604	0.0917600011324706	0.0876392240322238	0.0410900208588939	0.108468693680937	0.0314462515422212	0.0172082168099234	0.0264228323658024	0	0	0.132	0.0850754896210821	1.05509653444301
TCGA-AA-3977-01A-01R-1022-07	0.0408235789268813	0	0.00475626552720738	0.0678414075759634	0	0.188756205048007	0.0873078174540517	0.107100112332409	0	0.0560291282435389	0.0123419075940476	0	0	0.134049871347492	0.0738741562355627	0.145128371727753	0.0390620323438611	0	0	0.0368270823890644	0.000597297121936026	0.00550476613222477	0.051	0.160582738745031	1.0211165182387
TCGA-AA-A01F-01A-01R-A002-07	0.00109409619004354	0	0	0.0265427544765411	0	0.274885053996435	0.186000763577402	0.0101087619390033	0	0	0	0.0895614412454462	0	0.21249544371007	0.0652171916587843	0.077344179386825	0.0124429945926422	0	0.0399657648819496	0	0	0.00434155434485812	0.549	0.0069816426384797	1.09337021226009
TCGA-D5-5540-01A-01R-1653-07	0	0	0	0.175446627277777	0	0.0926226083696795	0.211858158756715	0.0706577490533014	0	0	0.015104733554061	0	0	0.111329658740716	0.12567991578911	0.150802816774227	0.0138663201454209	0	0	0.0121212492091838	0.0157750439465365	0.0047351183832715	0.025	0.206291990732485	1.00638385071949
TCGA-5M-AAT4-01A-11R-A41B-07	0.0795533445821569	0	0	0.322801993664333	0	0.036296355779994	0	0.0391467750414529	0.0154184434179054	0	7.11400613189895e-05	0	0.0266891010509261	0.207440260146665	0.0461903319398068	0.108549665957389	0	0.00125315137761462	0	0.0981197061831533	0.0184697307972833	0	0.455	0.0173606259746222	1.09065410991461
TCGA-AA-3864-01A-01R-1022-07	0.0530988200878735	0	0	0.0452437354484493	0	0.302747354314825	0.0198552918031065	0.0481133060172811	0	0	0.000998671882670952	0.0310943515931503	0	0.165191964038654	0.0990594658699711	0.174290718492562	0.00353904462729814	0	0.0214109864680946	0	0.000956202567478953	0.034400086788585	0.106	0.101082532598716	1.05107200085744
TCGA-CA-6717-01A-11R-1839-07	0.0370784141457967	0	0.0454865810827682	0.0840605188761222	0	0.161821775071718	0	0.0503000287485928	0.0586938552528636	0.0164489405681803	0	0.00854468588923101	0	0.272150777868687	0.059503108576952	0.117325897392117	0.0470256229583601	0	0.00666722386598771	0.0348925697026223	0	0	0.054	0.150778452989549	1.03097667227121
TCGA-CM-6161-01A-11R-1653-07	0.0396090569962681	0	0.00764689873864896	0.117669926801633	0	0.239634422263806	0.13561069828267	0.0297602456410465	0.00406524863349234	0	0.00874696493281859	0	0	0.176142908318134	0.0201352254451149	0.127925546935062	0.0386711166704029	0.00652879806438588	0.022972552936727	0	0.0248803893397893	0	0.051	0.160841006040792	1.0204829368066
TCGA-AA-3819-01A-01R-0905-07	0.0265331652415173	0	0.0048098381819786	0.0323161432460241	0	0.249834606690753	0.0927941224864376	0.0229209456765419	0.0327760831732422	0	0.00888168989327797	0	0	0.0689359858039099	0.0115975719435997	0.176015588238626	0.144361427853876	0.0523514015190246	0.0408457612744954	0	0.0206050657375615	0.0144206030391338	0.229	0.055127090117996	1.05207994048978
TCGA-AA-3861-01A-01R-1022-07	0.200569382124492	0	0.240364908736847	0.104310120330435	0	0.235795782675721	0.00368304014425083	0.00519137756100408	0.0231430619765701	0	0	0.0123949744727087	0.0154526481589105	0.0369737926480849	0.0540091492791285	0.0296611641590943	0.0295841187726726	0	0	0.00625661443539097	0.00260986452469005	0	0.001	0.5124072386329	0.860666137816363
TCGA-D5-6926-01A-11R-1928-07	0.0230325305628762	0	0.00670265303606737	0.010214543502271	0	0.0503742623778429	0.0505713840485902	0.00674740855447258	0.0262852974861164	0	0.0459061286673623	0	0	0.499984700991428	0.0751947397365541	0.0840755260111611	0.00287085686248989	0	0	0.0947382767758944	0	0.0233016913868732	0.069	0.135541548377359	1.08116875629729
TCGA-AA-3531-01A-01R-0821-07	0.0206064944975285	0	0.010351882236418	0.133243097893295	0	0.113786188175744	0	0.0223323590758548	0.0636510706625036	0	0.0325693429680328	0.000576642103130318	0	0.305163843196784	0.0889444128557475	0.114164495031862	0.0206884969285589	0	0	0.0739216743745406	0	0	0.222	0.0567551223426579	1.08121754643034
TCGA-AA-3685-01A-02R-A32Z-07	0.0442817013540639	0	0.0142645766118204	0.119550465816585	0	0.196525878108581	0.0819593371853348	0.0554681113740819	2.95078321568086e-05	0	0	0.0286263948440272	0.00500267137641529	0.0539429370783805	0.134013304210555	0.191403787095033	0.0107478519120268	0.00699056617772874	0	0.00806383698786318	0.0491290720353465	0	0.054	0.154043508866202	1.02712091646966
TCGA-AA-3712-01A-21R-1723-07	0.00546745643511627	0	0.00326367298259329	0.0946834551060778	0	0.127149962523981	0.15969671172327	0.022795722259657	0	0	0.0406400109327332	0.00476205434807823	0	0.228877209804052	0.103430052321716	0.161851782855168	0.00887043820671979	0	0.02960388548683	0	0	0.00890758501400752	0.109	0.0979247362960745	1.05088562080973
TCGA-AA-3837-01A-01R-0905-07	0.0754331081315981	0	0.00507218216878168	0.159875318255408	0	0.288352002743725	0.147806817431299	0	0	0	0	0.0078814074931717	0.0348602544008501	0.0447960214237425	0.0867337068231362	0.0852753497169829	0.0501321936430112	0	0.0137816377682935	0	0	0	0.073	0.124948989358358	1.04050402943229
TCGA-AZ-4616-01A-21R-1839-07	0.0294337698747703	0	0.00448880944892104	0.255613369050619	0	0.0754650395295844	0.171097912489563	0.0178489928940225	0.0262142206067182	0	0.0243254524680869	0.0312728486960959	0	0.122352287217659	0.160033901344324	0.0539012419158027	0	0.00823861215944707	0.0197135423043863	0	0	0	0.015	0.243425950094379	1.00013092469781
TCGA-D5-6928-01A-11R-1928-07	0.0406716706744174	0.00122180060440014	0	0.266872269566907	0	0.0855875919319216	0.1129446894367	0.0536697513856579	0.0469661088427474	0	0.0327374712161012	0.00255934276341701	0	0.129255250942864	0.0696917989357901	0.0897490518836076	0.0112594861122035	0	0.0358951187256704	0	0	0.0209185969775944	0.136	0.084321434105009	1.06099627148353
TCGA-AA-A02J-01A-01R-A00A-07	0.0409987503862944	0	0.0142233200874234	0.02908280760846	0	0.191682192406276	0.205452063939148	0.0377652338984199	0	0	0.0432949428487886	0	0.0164803567777267	0.299938937479129	0.0196460091712936	0.00908000107008439	0.000733333785511948	0.0251971526608893	0	0.063812311484161	0.00261258639639338	0	0.267	0.0484006963255007	1.07192427590366
TCGA-D5-6538-01A-11R-1723-07	0.022319164913163	0.01248222287471	0	0.0317240274331413	0	0.171389392683062	0.115847676090139	0.0255329460584567	0	0	0.0348441146947503	0.0194252819648738	0.0278619203747611	0.411334522094612	0.00448269869140344	0.070855865327464	0	0.0161848494848495	0.0318606946304726	0	0.00385462268414185	0	0.546	0.0073053916789954	1.10722999299296
TCGA-NH-A6GB-01A-11R-A37K-07	0	0.0086045011795707	0.0643688356929291	0.0552295381750764	0	0.183241793142284	0.175738232344494	0.0688070046149833	0.00491087301226132	0	0.0455877748474479	0.00374350998668237	0	0.228085680106146	0.0442973951668728	0.0510813430167862	0	0	0.0312853631211824	0	0	0.0350181555932833	0.443	0.0193138204554704	1.07579629558275
TCGA-A6-2682-01A-01R-1410-07	0.0123899598192285	0	0.00271795762468438	0.0170531200137165	0	0.0354032832112913	0.0513154761388076	0.0177602503126029	0.0163936812636042	0	0.029263229826405	0	0	0.370170606609605	0	0.023296569307992	0	0	0	0.390040478742221	0	0.0341953871298414	0.0570000000000001	0.147308714219326	1.10783211818329
TCGA-AA-A02Y-01A-43R-A32Y-07	0	0	0.0037922308473327	0.276198001550579	0	0.188662165159843	0.169230592723352	0.0500876350742249	0	0	0	0.0270759189537485	0.00820995852543325	0.0576791134278701	0.130828835327834	0.0477380016248293	0.0197942964637851	0	0.0207032503211687	0	0	0	0.076	0.121281509820964	1.0651803694941
TCGA-AA-3850-01A-01R-1022-07	0.00780590542403091	0	0.145057115525494	0.0574941814932416	0	0.182019036137494	0.0812778153620667	0.0677583072303247	0.0267579901568963	0	0.0422157665561259	0	0	0.189035110288205	0.0273331526008302	0.144134473240982	0	0	0	0.0178174511701675	0.000328377877413268	0.0109653169367288	0.012	0.255972647629311	0.982519795156358
TCGA-CK-6747-01A-11R-1839-07	0.108664735706103	0	0.103037558452206	0.0916517503389563	0	0.204836082271001	0.0613921096751732	0.0250466219279768	0.0547331010953242	0	0.00859793909257645	0.00243306274562479	0.00505622266803623	0.0761823586384184	0.0725838697303044	0.0807474028921808	0.0682203452472982	0	0.03681683951882	0	0	0	0.00600000000000001	0.346273088392801	0.94043661233997
TCGA-A6-6782-01A-11R-1839-07	0.097105633081025	0	0.0477734103501013	0.179200672040342	0	0.124291415264235	0.0536098964123281	0	0	0	0.00118892459864091	0.0142125165284386	0.0191632473701522	0.194758763205281	0.147737023172924	0.104342192513879	0.0067900548999509	0	0	0.00548011233686592	0	0.00434613822583503	0.026	0.204554103062285	1.00966222795607
TCGA-CM-5860-01A-01R-1653-07	0.0206108193607204	0	0.00457170660249353	0.0527479282908401	0	0.168970721815425	0.0376093653934873	0.0201636339361102	0.0349534351510365	0	0.0104635624657097	0	0	0.351795218220914	0.100421688574529	0.122800743722792	0.0141799752254235	0	0.0517996359916352	0.00891156524888447	0	0	0.032	0.196337377423768	1.01989365897696
TCGA-AA-A00R-01A-01R-A002-07	0.0274060694186125	0	0.00251214219057581	0.216713108907579	0	0.110374696352964	0.159070006231371	0.0584197670544317	0	0	0.0502918932631796	0.0221799702629786	0	0.124009532744223	0.0861079728927916	0.0785128559397398	0.0115997208575206	0	0.0408142855442396	0	0	0.0119879783397927	0.051	0.159884933001186	1.02780036123306
TCGA-A6-6653-01A-11R-1774-07	0.0590787633399457	0	0.00987627608529413	0.0280447982115341	0	0.238455207975296	0	0	0.0056529711610148	0	0.00589310653615847	0.0379146548283958	0	0.352925822613546	0.044344366218365	0.0662632184576265	0.0180190248951842	0	0	0.119540785862714	0.00554738014535583	0.00844362366957052	0.027	0.202971231323176	1.01895974635125
TCGA-AD-6890-01A-11R-1928-07	0.0691490696184062	0	0.0101337436011066	0.112102829141834	0	0.103404841654566	0.156179916021774	0	0.00927389546479701	0	0.0498416643585798	0	0.0216442388637788	0.282250037356103	0.0866291129584789	0.0550512137626577	0.0167614263706783	0	0.0167001172364552	0	0.0108778935907842	0	0.053	0.157101587078334	1.02384718753526
TCGA-D5-6539-01A-11R-1723-07	0.00580201390078574	0	0.109731520118512	0.0909578492459774	0	0.253418020596622	0	0.0150459013254254	0.0518191125163038	0	0	0.00908879697841431	0.0063827361372514	0.0440977149048656	0.0464823342163686	0.141388171023925	0.09233209595844	0.0196629573026108	0.0799516058487999	0	0.0338391699256973	0	0.028	0.19897803066434	0.999372128874947
TCGA-AD-A5EK-01A-11R-A28H-07	0.0338675830774797	0	0.0025253084970573	0.0121833217513339	0	0.432048715350258	0.0517971172092992	0.0464063764234693	0	0	0.0277917682799242	0	0	0.197974978167691	0.0189899568881395	0.108903309329287	0	0.0459418320360719	0.0215697329899902	0	0	0	0.207	0.0601111599902599	1.07594149979616
TCGA-A6-3808-01A-01R-1022-07	0.118916898562565	0	0.0110671492889034	0.0391206500521459	0	0.209434110524128	0.0253984470493532	0.0362845466226185	0.0142401679504881	0	0	0.0162380959508014	0	0.213396125603506	0.061269289577962	0.115990826030759	0.00548244350854808	0	0	0.0957486611355365	0.0141370532398647	0.0232755349028208	0.01	0.273668958565294	0.973653374116784
TCGA-AA-3506-01A-01R-1410-07	0.0414926484544389	0	0.00381833413747588	0.193741234279521	0	0.054863821416545	0.00360596536452188	0.0143175567123432	0.0710684328978115	0	0.00519989420170537	0	0	0.248803757898291	0.0764398531291309	0.180815701679796	0.0198214597276497	0	0	0.0637140734376485	0.0222972666631205	0	0.095	0.108076636566076	1.05226161052931
TCGA-G4-6298-01A-11R-1723-07	0.0342224388139309	0.00853680262471129	0	0.0712014442327101	0	0.0643519757190932	0.124665215671366	0	0.0262598216964265	0	0.0418620743521501	0.0325798082822287	0.00982120329206036	0.350471153455949	0.00441313874808494	0.105483991593856	0.0216182943612541	0.0100606137609628	0	0.087832702621477	0.00151710474753977	0.0051022160261984	0.371	0.0276330340662975	1.0958040926745
TCGA-AZ-6608-01A-11R-1839-07	0.106116143406122	0	0.0241339424804503	0.0354555973718801	0	0.22105347940619	0.195313824421186	0.0585486441339122	0.0143819596501649	0	0	0	0	0.254895309460095	0.0285783408540382	0.0529623403247558	0	0.00621678553704422	0.00234363295416086	0	0	0	0.255	0.0511679675336736	1.06934039751063
TCGA-AA-3678-01A-01R-0905-07	0.0651790302570914	0	0.00606264149278481	0.068929133205975	0	0.250537631765244	0.173592665545253	0	0	0	0.035371614205881	0	0.0156117811795976	0.210783838372224	0.0343360645059084	0.068577868651831	0	0.0454345144442786	0	0.0255832163739309	0	0	0.085	0.113988805958219	1.03962594545665
TCGA-A6-5665-01A-01R-1653-07	0.0930596439911742	0	0	0.256424284944771	0	0.193273874836078	0.101737229487192	0.017498385250171	0.000438001124162437	0	0.03879890019234	0	0.0114416742623237	0.0843085856714913	0.0477861386249005	0.0619345973014577	0	0.0190761673039789	0	0.0609960125006515	0.0132265045093076	0	0.053	0.156734156043089	1.03295838668135
TCGA-G4-6306-01A-11R-1774-07	0.0113694811353938	0.0138323587733787	0.00170149698102608	0.298612880486394	0	0.189949582570487	0.0336519168596161	0.00905857531501041	0.0386011379925404	0	0	0.0965636706879563	0.0238782313721373	0.131747507359601	0.0983743106710743	0	0.0179126228880189	0	0.0300360736245945	0	0.00471015328277136	0	0.123	0.0894807674754108	1.08586667288922
TCGA-F4-6806-01A-11R-1839-07	0.246786636310389	0	0.0113224916042941	0.117647458193464	0	0.232287887167947	0	0.0391111402773309	0.0560994331763431	0	0	0	0.01985877648467	0.0979277550381737	0.0328175586231315	0.0270745278765385	0.0346478939061086	0	0	0.0762501590082951	0.00816828233331498	0	0.00700000000000001	0.30119186592479	0.967146112721908
TCGA-AA-A01T-01A-21R-A16W-07	0.0325006383914552	0	0.0367290502518299	0.069668644409356	0	0.234380910453391	0.0140797582638613	0	0.10426581339071	0	0	0.0809905568615187	0	0.192318079360466	0.14002844025814	0.0316688678042679	0	0.0106594326428231	0	0.05270980791218	0	0	0.338	0.0332797608722613	1.09538767525188
TCGA-A6-6651-01A-21R-1839-07	0.101164349426703	0	0.0866083791359003	0.0665060179445084	0	0.0836981511271238	0.0628890378675226	0	0.0335331049659287	0	0.0135603964437426	0	0	0.343256679656292	0.0365253544809544	0.102669347230556	0.00863418562416183	0	0.0602444406394648	0	0	0.000710555457141324	0.00800000000000001	0.285880218393722	0.972527393448253
TCGA-AA-3812-01A-01R-0905-07	0.0109239172151224	0	0.00370368220598701	0.0562781918677561	0	0.0348265268891842	0.00027029825261222	0.0165055166688859	0.0581021159019026	0	0	0	0	0.701281740914682	0.0149602542954059	0.0627860259022574	0.0026150738128249	0	0	0.0377466560733794	0	0	0.001	0.55787424000854	0.840722249043157
TCGA-F4-6809-01A-11R-1839-07	0.154788176048491	0	0	0.120189015812929	0	0.21112022410531	0	0.0245149637738778	0.0690093085934599	0	0	0.0106878691114242	0	0.168015530774725	0.102754921560723	0.102465581084203	0.00412673209054671	0	0	0.0323276770443103	0	0	0.01	0.268756502600716	0.980306504763649
TCGA-AD-5900-01A-11R-1653-07	0.103945686045788	0	0.00717697752293009	0.175515219969537	0	0.168473559392274	0.045690662190092	0.0454257339546069	0.00470282890958891	0	0.0104709572784649	0.0184392097203893	0	0.154497588399872	0.0738803560251243	0.142263827552617	0	0	0.0495173930387163	0	0	0	0.018	0.22663304498945	0.993933995179981
TCGA-D5-6930-01A-11R-1928-07	0.131845376042085	0	0.0190931028934483	0.148267637106326	0	0.175607784731879	0.0196379396597007	0.0483320956789934	0.0150008225313105	0	0.0133414118483235	0.0403094473436028	0	0.179501816511329	0.121448153287352	0.0674209455850867	0.00839277676305305	0	0	0.0118006900175094	0	0	0.031	0.196686550515509	1.01496039947356
TCGA-AA-A03J-01A-21R-A16W-07	0.0125258980259908	0.0117875205921612	0	0.271251952802906	0	0	0.160205397625382	0.0241913848878778	0.0409918001250324	0	0.0137760314333517	0.0409071493554374	0	0.189200277511604	0.055883100828896	0.131939525425886	0.0258872060615595	0	0.0214527553239147	0	0	0	0.0629999999999999	0.141995246971021	1.03480985759112
TCGA-AA-3815-01A-01R-1022-07	0.0679964351880175	0	0.0012476994572449	0.217452926674184	0	0.147451877521205	0.104815009940991	0.0165750844024282	0.0142922681171058	0	0	0.050706116080874	0	0.112634885539572	0.0905653727261378	0.122959469515774	0.003211138224297	0.00513742526825762	0.044954291343912	0	0	0	0.017	0.232412445321189	0.994487128431846
TCGA-CM-6169-01A-11R-1653-07	0.0398832489438666	0	0.00572792077775241	0.0128636999121349	0	0.156800082221656	0.144457241954306	0	0	0	0.0371133367814622	0	0	0.341747727302234	0.0578952934391065	0.145640311295452	0.00367989808610188	0	0.0357739104980706	0	0.0184173287878564	0	0.07	0.133826440233479	1.04127954693038
TCGA-A6-6650-01B-02R-A277-07	0.107253817427276	0	0.15854176053495	0	0	0.428476389608005	0.041927920695934	0.0012942688825031	0	0	0.0216847381509806	0	0.00269507894842481	0.0051364089594239	0.0294456381106544	0.124110404604946	0.0148066768714826	0.0239439246197392	0	0.0159679322176584	0.0232164198145891	0.00149862055343225	0.049	0.164836075480946	1.03276320707112
TCGA-F4-6855-01A-11R-1928-07	0.0050477435721377	0.00814395055903709	0	0.0354203965264027	0	0.180772008193975	0	0.00788096826435326	0.0294308507216634	0	0	0.0585712869011771	0	0.298194361646467	0.0360485669415505	0.281372857899555	0.0162421900105181	0	0.0428748187631631	0	0	0	0.054	0.150872879948134	1.04337311114783
TCGA-CM-4748-01A-01R-1410-07	0.0700869101381911	0	0.00446766085179565	0.0316855549202837	0	0.0869616550823185	0.0190327379743426	0.0367927917813103	0.0479344101710852	0	0.0180114141129376	0	0	0.368987576835219	0.0346196333511644	0.138408748154067	0.0229201091435068	0	0	0.120090797483779	0	0	0.015	0.242546509614754	1.00234658801873
TCGA-AA-3517-01A-01R-0821-07	0.0359335139336817	0	0.00856855330979311	0.0529424412619416	0	0.112958399229059	0.106264843585566	0.000851526171170717	0.00415279105373791	0	0.0551822816996977	0	0	0.3498946380429	0.0181266268540757	0.18096700207758	0	0	0	0.0741573827807978	0	0	0.105	0.102237701534084	1.06444035877117
TCGA-D5-5541-01A-01R-1653-07	0.0570638645946449	0	0.0360116121276996	0.0816922115850385	0	0.128540978876914	0.0330926945378238	0.0254065609620805	0.00371962745448252	0	0	0.000156818125261184	0	0.448519267598032	0.0671414976261837	0.112120756957757	0.00197560634254089	0	0	0.00455850321154189	0	0	0.01	0.277043789527112	0.991211321113034
TCGA-A6-2686-01A-01R-A32Z-07	0.0745957602402292	0	0.0101020635341931	0.181904409373164	0	0.159335251831402	0.121910546273437	0.0436296726002571	0.0233764985849783	0	0.0371298522988075	0	0	0.109809986671125	0.061439427461472	0.0996564272516581	0.0539959274557354	0	0.0017438293343866	0	0.0190238806198463	0.00234646646930915	0.00900000000000001	0.280816165809091	0.97017565213888
TCGA-NH-A50U-01A-33R-A37K-07	0.0067826318578282	0.0160270746432975	0	0.0372268809760869	0	0	0	0.00462352912525893	0.0657076265988242	7.88473193707082e-05	0.09308188957413	0	0	0.477753346502476	0.0139122418769269	0.0867331518576438	0	0	0	0.198072779668157	0	0	0.049	0.164440535964507	1.07368826185815
TCGA-AA-3543-01A-01R-0826-07	0.0133019415533791	0	0.00148042285973368	0.302662936986581	0	0.106403811207784	0.110065649745891	0.063591135608007	0.0394811129865372	0	0.0325540633231086	0	0.00303138590019572	0.0782396156383735	0.117197875824845	0.0943457487771375	0.0099850097472	0	0.0211152078855673	0	0	0.00654408195565895	0.074	0.123304097719579	1.05742779675261
TCGA-AA-3518-01A-02R-0826-07	0.0767674156956636	0	0.0444293651262425	0.114225795534528	0	0.161938791993162	0.0508911010506899	0.0299404526732741	0.032908446586401	0	0.05229404252578	0.0109007500080685	0	0.200647445710708	0.0580249887399356	0.121427067448451	0	0	0	0.0433891203093194	0	0.00221521659777579	0.02	0.220353560386572	0.996783123605305
TCGA-AA-3984-01A-02R-1022-07	0.0441855516119196	0	0.00108645665132548	0.0937033468731501	0	0.218659876402113	0.109943112325309	0.0796550632881532	0.00167272445588509	0	0.0402205381417297	0	0	0.136218039054225	0.0686581538589551	0.0669010638240972	0	0.0203213288525433	0	0.1160091462053	0	0.00276559845529448	0.073	0.123965353830252	1.04136007710163
TCGA-CM-4752-01A-01R-1410-07	0.0959926080910845	0	0.00662596679300716	0.0706816056915769	0	0.146979983803665	0.167271708896862	0.0262516551679964	0.00176559373812526	0	0	0.01628967978534	0.00294021626489162	0.0957738297614967	0.087750418285675	0.149536817833174	0.0545458401569342	0	0.0737543775147226	0	0	0.0038396982154489	0.031	0.196923686493343	0.996719761552467
TCGA-AA-3663-01A-01R-1723-07	0.026806702394436	0	0.00500765056599603	0.0389476234315844	0	0.236001305743938	0.0142758867904693	0.0103189727151592	0	0.0105083073064652	0	0.00848685296253138	0	0.188133752022334	0.0745172469703923	0.19725606150805	0.0292340465798732	0	0	0.11534021396048	0.0369929217377602	0.00817245531053095	0.051	0.159763612853843	1.02567369844964
TCGA-AA-3549-01A-02R-0821-07	0.0144478621798087	0	0.00626653381567539	0.094620356847169	0	0.104528559117691	0.0471957111654742	0.0378125986800886	0.0324909253956375	0	0.0224054114395953	0.00245821904370561	0	0.248550389291143	0.0335448031304253	0.0344660607099685	0	0.0148344709076576	0	0.282759098994264	0	0.0236189992816965	0.074	0.123700931468242	1.06683361475822
TCGA-AA-3561-01A-01R-0821-07	0.0538293215642285	0	0.00523459466073408	0.0229333105013877	0	0.276752230050813	0.141887683191452	0.0147648711000789	0	0	0	0	0.017506582658573	0.0222869371691774	0.0936003604581359	0.240023106947781	0.0289942935278547	0	0.0382135144436689	0	0.00912792995540643	0.0348452637707084	0.134	0.0848386969929302	1.04312945305114
TCGA-G4-6626-01A-11R-1774-07	0.0339731145083082	0.0263047466299468	0	0.157505066709841	0	0.155683892819644	0.195226136623251	0.00980952670156059	0	0	0	0	0.00283725357812938	0.21778202418487	0.0567584886853024	0.0199578406599268	0.000922540485601139	0.03287816249802	0	0.0484272308593785	0.041933975056219	0	0.152	0.077691472568039	1.05618203022805
TCGA-AA-3821-01A-01R-1022-07	0.0330297184818365	0	0.00378374623582723	0.0493551570217321	0	0.229853399697963	0.0544149398002119	0.0222155191964321	0	0	0.0416590974832223	0	0	0.220450503314021	0.0632039945335577	0.195662874744003	0.00840153797549754	0	0.0343227117444685	0	0.027734314152671	0.0159124856185555	0.07	0.134549696682642	1.0327334695861
TCGA-CK-4952-01A-01R-1723-07	0.0339959723756925	0	0.0112422594982547	0	0	0.255259908062102	0.0131229408741293	0	0	0	0.0201991325124915	0	0	0.258688598065835	0.0452828101783208	0.113826763591924	0	0.0148261526623825	0	0.0431746050089376	0.0341472606815118	0.156233596488419	0.055	0.14845038808632	1.03890818302627
TCGA-A6-2681-01A-01R-1410-07	0.0439098949577179	0	0	0.0943974261842438	0	0.063952842848519	0.00344250419256821	0.0234935646225688	0.0644333848767756	0	0	0	0	0.436459965185564	0.0674729692137939	0.0959066121216735	0.0181761910644989	0	0	0.0883546447320768	0	0	0.004	0.391947866162803	0.929429071878991
TCGA-AY-6197-01A-11R-1723-07	0.0533702619640922	0	0.00742424561458492	0.0572065897158385	0	0.187019253896111	0.0400802505259162	0.0152285712790222	0.0420826289196026	0	0.0821707863716382	0	0	0.262208430103496	0.0437156199601458	0.0549509232066272	0	0	0	0.136010749961323	0.00401768183376989	0.0145140066478327	0.091	0.109496250722424	1.05144639817466
TCGA-AY-6386-01A-21R-1723-07	0.00661717405647614	0	0.0284715791196929	0.0534655729672724	0	0.157498963543348	0.0295196516673023	0.0347824276218184	0.0539299826436246	0	0.0468097497252503	0	0	0.32338990747014	0.0444244898755462	0.0507381894652565	0.0323715582235678	0.001602786445428	0	0.130828367926854	0.00311695886635039	0.00243264038207176	0.075	0.122474702880667	1.05081702230932
TCGA-AU-3779-01A-01R-1723-07	0.0201550578968302	0	0.00259447753670558	0.0250591688325642	0	0.248361217076667	0.00234711202302151	0.0242149463702092	0.0927506322582046	0	0.0177629792531184	0	0	0.317211327742269	0.0335807597560594	0.0763421251289734	0.0180305571687156	0	0	0.108452532466979	0	0.0131371064896821	0.14	0.0826677325998699	1.07225541149001
TCGA-CM-4744-01A-01R-A32Z-07	0.025279757430355	0	0	0.410536902540146	0	0	0.206088635556428	0.0495616293979548	0.0605660098601975	0	0	0.0195703802013301	0.00296448713902151	0.0225479622445045	0.0551614750250785	0.0806845055674508	0.0319016581916189	0.00838541596116626	0.0267511808847479	0	0	0	0.025	0.20708073053076	1.02164243247531
TCGA-AD-A5EJ-01A-11R-A28H-07	0.0368704488933302	0	0.00661721134298515	0.0829069242258566	0	0.128899132604817	0.0361985775411515	0.0183483204456735	0.0158736901151279	0	0.0570853685705602	0.0349789757596456	0	0.30346429172875	0.0222844636906029	0.104039879998097	0	0	0	0.13146017421571	0	0.0209725408676923	0.097	0.106430309136246	1.06079841861526
TCGA-AA-A00F-01A-01R-A002-07	0.131484338167913	0	0.00713405493817236	0.0981217782471718	0	0.291448666773377	0	0.00374417832192491	0.000694672159560336	0	0.0142720620528882	0	0.00331262745855643	0.169056710997443	0.07339457370993	0.102975188054965	0.00415313561166658	0	0	0.100208013506432	0	0	0.037	0.180583108759845	1.01712786906567
TCGA-AA-3866-01A-01R-1022-07	0.0303421975715154	0	0.00654367195743232	0.0688254763397046	0	0.168746029836721	0.103864159316872	0.015171741835748	0.0217340078426183	0	0.00996547446080527	0	0	0.266601589518213	0.0594496181437133	0.141133158652898	0.037801933694205	0.0160310577154948	0.0132584743918881	0	0	0.040531408722172	0.038	0.17707035005704	1.01736744464101
TCGA-AA-A01K-01A-01R-A00A-07	0.0579310879279657	0	0	0.0691753071107217	0	0.128124376733928	0.0084298538165266	0.0206432324711915	0.0686756394400712	0	0	0.0195639986323748	0	0.342964352098523	0.0857658077708897	0.177193732674693	0.00891803927959756	0	0	0.0126145720435179	0	0	0.0679999999999999	0.136848954055768	1.0510310762696
TCGA-CM-5863-01A-21R-1839-07	0.0775775516719828	0	0.018699224686917	0.0982034167973252	0	0.274985978170605	0.0050737556953696	0	0	0	0.0054038645207119	0	0.0204157084708553	0.1654084429799	0.101706015071762	0.183332761989223	0.00951928455795355	0	0.0183956452567796	0.00681997714572802	0	0.0144583729848874	0.051	0.158761262427416	1.02454364183184
TCGA-A6-3809-01A-01R-A278-07	0.00502840323121119	0.00614880079410733	0.00172580896401271	0	0	0.186957884740851	0.0907946899154222	0.0731775905271541	0	0.0515723740330415	0	0	0	0.104457685880287	0.100424865535994	0.206055593644433	0.0232959323819573	0	0	0.0948564275021624	0.0353424486868288	0.0201614941625379	0.131	0.0855790740370577	1.05014549279279
TCGA-NH-A8F7-06A-31R-A41B-07	0.00811190902549285	0	0	0.0448075876340705	0	0.324349102824476	0	0	0.0645824418945887	0	0	0.0252131136453759	0.0363103345051604	0.298178858837599	0.0135035844832491	0	0	0	0	0.15445528564732	0.0304877815026668	0	0.55	0.00677877737694969	1.1115297711001
TCGA-D5-6932-01A-11R-1928-07	0.0300315747800116	0	0.00227218947236938	0.0622021520882013	0	0.101997776463223	0.0518284451575537	0.0355647030999992	0.0403046206317026	0	0	0.0382383439414817	0	0.358150421876217	0.0484236280326412	0.115726497943887	0.0146647515674355	0	0	0.100547940898911	0	4.69540463658404e-05	0.026	0.205898325479222	1.01842928602025
TCGA-AA-3675-01A-02R-0905-07	0.0627158834586965	0	0.014335798507523	0.0793893080970437	0	0.23994793219316	0.0919056921414429	0.0227686099431044	0	0	0.014294937451351	0	0.0181016323039079	0.120841208513195	0.0359318474230223	0.146541036011238	0.0109422199753221	0.043010267662745	0	0.0580676028931515	0.0404745105480809	0.000731512877016028	0.073	0.125563480664474	1.02862582290582
TCGA-A6-2680-01A-01R-1410-07	0.0603227579372129	0	0.0488264526799686	0.0751511299278559	0	0.154693507990588	0	0	0.0350730929953505	0	0	0	0	0.321030122416436	0.0706260587851327	0.105842233205862	0.0323905687554847	0	0	0.0636419164318893	0.0324021588742196	0	0.038	0.177038689557566	1.02357139433851
TCGA-CM-5862-01A-01R-1653-07	0.0316657030603815	0	0.0110542535951472	0.0322295430431908	0	0.244696545169746	0.11836459819445	0.0088505686650629	0	0	0.0444183266331753	0.0768358382624279	3.14732258254177e-05	0.24378837154659	0.0203244922679895	0.0826595572935942	0.00513670834968312	0.00546787559214387	0.0568328367864632	0	0.0162514762257416	0.00139183208838703	0.265	0.0494307180994601	1.07145736151462
TCGA-AA-3555-01A-01R-0821-07	0.0334671474264148	0	0.00508000156438738	0	0	0.187839873136426	0	0.0209943185471082	0	0	0.0127032297403403	0.0133334024919971	0	0.176995087651991	0.0977555523318199	0.124165878125106	0	0.0174474058799678	0	0.157801296508178	0.0109200364118218	0.141496770184441	0.016	0.241449311577191	0.997092208960719
TCGA-DM-A28G-01A-11R-A16W-07	0.0205878882499008	0	0.0162231021779813	0.150573945077504	0	0.321263234625961	0.0295333531222532	0.0176433799944688	0.0385673474545324	0	0.00653741487186244	0	0	0.24184909435346	0.021435868151008	0.118606452630259	0.00915006248741481	0	0	0.00802885680339391	0	0	0.173	0.0700516051900536	1.08026062460947
TCGA-5M-AATE-01A-11R-A41B-07	0.070138861926888	0	0	0.132626386016081	0	0.230048500606102	0.0150985019182972	0.0251970578585994	0.00807778775663247	0	0.0147696382041157	0	0	0.269641257135014	0.0276189856661679	0.141529607173059	0.00963255615895977	0.00333059977095596	0	0.0522902598091275	0	0	0.105	0.102268706123293	1.05686992075945
TCGA-DM-A28H-01A-11R-A16W-07	0.100619389395255	0	0.10743612379924	0.0521566464501976	0	0.138701373546037	0.0252088451268005	0.0618806503288774	0.00328448176851851	0	0	0.0139186396023315	0.000265550554932739	0.130832771304655	0.0808809800228681	0.100621670822354	0.157328404463541	0	0.0221191799250187	0.00474529288937304	0	0	0.02	0.221704263824382	0.992844601640503
TCGA-AA-A024-01A-02R-A00A-07	0.0102120431193085	0	0.00456212251707443	0.0266347660064213	0	0.330509011700329	0	0.0543159974523762	0.0425740367542307	0	0	0.107066658441008	0.00429531536992478	0.196913716069198	0.0305470626016217	0.0921990892518061	0.00381162268264532	0	0	0.0963585580340554	0	0	0.313	0.0372932401199499	1.09500631922996
TCGA-CM-4747-01A-01R-1410-07	0.00695736890735866	0	0.00408417568873928	0.0818719371082078	0	0.18995222216951	0	0.0149779219485864	0.0635065085122793	0	0.0299046951605327	0	0	0.447747382537851	0.0229046387460975	0.0519975694978303	0	0	0	0.0860955797230078	0	0	0.049	0.165208390004138	1.05209900441079
TCGA-G4-6314-01A-11R-1723-07	0.076856332798978	0	0.00660388163604835	0.0708767079170371	0	0.210873502815736	0	0.0245702129616413	0	0	0	0	0	0.255059032932979	0.114021638744449	0.198644571145321	0	0	0	0.0424941190478112	0	0	0.035	0.188363398844259	1.02023050516098
TCGA-AA-3930-01A-01R-1022-07	0.0490859367693348	0	0.0532561921454877	0.0813447760737352	0	0.185100955565721	0.0352547604561689	0.0236744002064066	0.00920072290637156	0	0.00317673304668151	0.0130077666198423	0.0106404786871263	0.136744905408113	0.0623837151755784	0.162078420109667	0.0333117413369352	0.00404684958819519	0.031435228697283	0	0.0150491654064579	0.091207251800894	0.084	0.114410573880974	1.03351369613047
TCGA-CA-6718-01A-11R-1839-07	0.0671769159950498	0	0.0621681766633797	0.0952436472956834	0	0.111391886972765	0.0603759764063156	0.0605429334557944	0	0.0755720413228979	0.0448464290726072	0.0290432963188237	0	0.0760985818956996	0.175560980093365	0.0826451987860654	0.0214593153956509	0	0.0316704272956951	0	0	0.00620419303020749	0.005	0.381582942197119	0.927656798112211
TCGA-AD-6963-01A-11R-1928-07	0.0542578640595103	0	0.00983949076054436	0.273703269416065	0	0.0937574941282609	0.160826416510747	0.0662078223899892	0	0	0.0157807312558548	0	0	0.12390968850983	0.0822192449981395	0.061895088664827	0.00975634055741965	0	0	0.00221582353892807	0	0.0456307252098841	0.043	0.171563519069471	1.02430981156983
TCGA-AA-3982-01A-02R-1022-07	0.0391199863026421	0	0	0.175242289352238	0	0.193459596439829	0.0410277535137029	0.0134269064163751	0.054926473387825	0	0	0	0	0.0844594325145418	0.0743452301874021	0.208170623816868	0.09489953853187	0	0.00696660578147307	0.0139555637552329	0	0	0.024	0.207709813012145	1.00256358977321
TCGA-5M-AATA-01A-31R-A41B-07	0.0676151780123174	0	0.00306165405106595	0.114381277778524	0	0.400669102633938	0.0645454166906895	0.0321882562155783	0.028839361672362	0	0.00362340421977615	0	0.0116907847584922	0.10603723371339	0.0235565258551065	0.0584363880393844	0.0111937633259302	0.0143591917729295	0	0.0512980941374324	0.0085043671230835	0	0.087	0.112907085414705	1.05875940345689
TCGA-CM-6680-01A-11R-1839-07	0.0231402754422249	0	0.00223339335340163	0.048238593898318	0	0.323010217709162	0.0275995598048821	0.0213893042978965	0.0547760821361767	0	0.0188593640177042	0.000286722664506194	0	0.295745656848416	0.0433283768371928	0.108237900535005	0.00922268946431819	0	0	0.023931862990795	0	0	0.166	0.0722628679498931	1.07678667506287
TCGA-DM-A1D6-01A-21R-A155-07	0.00233511375903758	0	0.018823215858421	0.0999182018907924	0	0.392567882271158	0.00412928707827287	0	0.00573394375578302	0	0	0.000780583458615539	0.00664158859863339	0.251882246574477	0.025535810341821	0.111332724311977	0.00700343034964769	0.052446025110459	0	0.0208699466409047	0	0	0.421	0.0215954289363167	1.0998917340114
TCGA-AZ-6603-01A-11R-1839-07	0.0493425832784352	0	0.00855818913888059	0.08079217196229	0	0.201063103685346	0.102321159925266	0.0259913051598052	0	0	0.0210713790561293	0	0.0237787029450833	0.0708083836722236	0.207838010993887	0.122106131257072	0.0417160727118141	0	0.0446128062137674	0	0	0	0.021	0.216983738660213	1.00564713367813
TCGA-A6-6142-01A-11R-1774-07	0.0802255266738262	0	0.011135501716137	0.0234535463992523	0	0.0853769176469144	0	0.00715439154663242	0.0270885043917089	0	0	0.00962532985395491	0	0.517381354246036	0.0655919412401527	0.0498373803225447	0	0	0	0.0965908540685394	0.00762488839105282	0.0189138635032477	0.00700000000000001	0.299068856483596	0.991531403061264
TCGA-AZ-4315-01A-01R-1410-07	0.0155166492912666	0	0.01018044810716	0.119927901331732	0	0.152940333116717	0.0703676011659063	0.0788702645584956	0	0	0.0448058570791784	0.00655005881856784	0	0.136545227043731	0.162141846714989	0.1447389839823	0.0350363700647573	0	0.0223784587251999	0	0	0	0.076	0.121628466306386	1.04673790469497
TCGA-AD-6895-01A-11R-1928-07	0.00145142142067964	0	0.00439192336217732	0.213660468040937	0	0.0492850924787419	0.184700736929358	0.0829348825456888	0	0	0.0585634218459612	0.0326457622768406	0	0.0618850390634485	0.0961942334655173	0.0777017315569074	0.0213999043075487	0.0228616937293929	0.0909237750592631	0	0	0.00139991391753859	0.018	0.228061336466118	0.997589873080121
TCGA-CA-5796-01A-01R-1653-07	0.0433986665320521	0	0.120853629450424	0.0862582539451301	0	0.428537843109438	0.0178399630929086	0.00745165987693358	0.018830112096593	0	0	0.000986903302578491	0	0.0932783568793484	0.023486798800722	0.0660208372581608	0.0719374479529874	0.00745838152007244	0.0136611461826509	0	0	0	0.017	0.232227322531674	1.00098735862581
TCGA-A6-2672-01B-03R-2302-07	0.00433244245819713	0	0.00204951098140269	0.0447050803894365	0	0.249261199927109	0.112562604140573	0	0	0	0.103347142822234	0	0	0.285654847158011	0.0982488909095025	0.0739069509573353	0	0	0	0	0.0119628298956899	0.0139685003605093	0.286	0.0425110573517733	1.08533118464665
TCGA-AA-3510-01A-01R-1410-07	0.0536856901950582	0	0.00265064939680882	0.0653213928840256	0	0.233004452682192	0.0510197010861708	0	0.00844433621827222	0	0.0220899245030215	0	0	0.172607865645869	0.159981766749979	0.190096610534184	0.0210879136395778	0	0.00428404433194452	0.0074566618973514	0	0.00826899023554484	0.096	0.107482431478734	1.05393193234414
TCGA-AA-3527-01A-01R-0821-07	0.0212706354585251	0	0	0.153097580460148	0	0	0.168224053325506	0.00183433395630174	0.0077664455649266	0	0.039964495061143	0	0	0.429502923108473	0.0786940879003752	0.0589329780117226	0.0233468647532022	0	0.017365602399677	0	0	0	0.00700000000000001	0.301772650652574	0.973864524525717
TCGA-F4-6807-01A-11R-1839-07	0.0691134302532417	0	0.00214907951322749	0.190812255412195	0	0.160400535821653	0.0828992653130152	0.0291570579498694	0.0328517790074718	0	0.0116571815095522	0	0	0.160788230357111	0.102127459178016	0.110549588318027	0.0185417211335287	0	0.0230997445665612	0	0.00028734627919379	0.00556532538733725	0.074	0.123137994102704	1.04114448148302
TCGA-G4-6310-01A-11R-1723-07	0.0107934211031719	0.0590165791467831	0	0.0267359991833907	0	0.180600613044067	0.0391497452699811	0.00603446396568967	0.00037362697952539	0	0.0863702898232618	0	0	0.378247967475998	0	0.165114786564911	0	0	0	0.0182895944322385	0.0292729130109817	0	0.274	0.0466350890266693	1.09321752253543
TCGA-AA-A00K-01A-02R-A002-07	0.0197077834616811	0.0187595187341238	0	0.0754403635951771	0	0.168612976974441	0.207541966427301	0.000522583018681009	0.00496895160937444	0	0.0407872027668103	0	0	0.292057105245419	0	0.0785707410212642	0.0019648593166293	0	0	0.0910659478290977	0	0	0.091	0.109806307273897	1.05140399964118
TCGA-D5-6529-01A-11R-1774-07	0.00624501822752046	0.0166630115667017	0.0353047641917008	0.0840757727212014	0	0.224222882488251	0.027290145010115	0.0433414891201887	0.0334569086177024	0	0	0	0	0.191212906259414	0.0897829751638598	0.138132516233878	0.0121333170529547	0	0	0.0661313680777457	0.00372942959836803	0.0282774956703986	0.106	0.100555228515282	1.04910761635496
TCGA-AA-A01I-01A-02R-A089-07	0.0406535004989815	0	0.0189637797813714	0.112683407666678	0	0.314925384518511	0.0871469084205485	0	0	0	0	0.0285407859434087	0.0323813208772197	0.0520609793214059	0.144388588529047	0.0383809198755721	0.0625216160653792	0	0	0.0245332264545075	0.0428195820473695	0	0.109	0.0978252138098264	1.05638195920384
TCGA-AA-A01Z-01A-11R-A083-07	0.0646871308632904	0	0.00958731688321065	0.0354849616202809	0	0.371393352777246	0	0.0393813867095708	0.0626997404732117	0	0.0166351274618837	0	0.00690592019085313	0.17277942721404	0.023034015605618	0.0508432273535768	0.0216403493620778	0	0	0.12492804348514	0	0	0.256	0.0509153164841663	1.08032089333765
TCGA-G4-6588-01A-11R-1774-07	0.00736290707395218	0	0.00176261552376109	0.0173709588300449	0	0.270708651508245	0	0.00562316182809625	0.00911036856352792	0	0.0439734200815573	0	0	0.243075614474454	0.0190205871080691	0.133312729430615	0	0.0185393700679799	0	0.207172459239639	0	0.022967156270059	0.016	0.238022502785443	1.00199263200038
TCGA-CK-5912-01A-11R-1653-07	0.0669836590139142	0	0.064245134330624	0.0128211867772036	0	0.183560755086647	0.0765115900064729	0	0	0	0.0343681985775976	0	0	0.399509790163718	0.0260745757562126	0.0535174227984048	0.0107231679450695	0	0	0.071684519544136	0	0	0.047	0.166684876326992	1.03467036240294
TCGA-CM-6679-01A-11R-1839-07	0.0138269603462543	0	0.0324426933217622	0.063138939461954	0	0.249805776670306	8.5741271267639e-05	0.043013711585884	0.0381336376739549	0	0.0107704900736838	0	0	0.365848301757045	0.0694496331805121	0.0812754966787877	0.0230449356693429	0	0	0.00916368230924563	0	0	0.188	0.0645712334182315	1.08534025675952
TCGA-AA-3519-01A-02R-0821-07	0.0173897419719397	0	0.0632323079443054	0.026097195021115	0	0.352174461412756	0.023499002867667	0.0219661561650865	0	0	0	0.0144772130264389	0.0122221495481157	0.119031883138857	0.0506502501908858	0.165643584630255	0	0.0347128035035565	0	0.0474340178340473	0.0193995435155201	0.0320696892294542	0.073	0.126783174062461	1.03309361980156
TCGA-AZ-6607-01A-11R-1839-07	0.0300395055834315	0	0.00515156949151535	0.0999496295719605	0	0.344099614745699	0.0723749679335362	0	0	0	0.0644493517383498	0	0.00381741960880189	0.0868903064787174	0.0730205969992036	0.109181755081831	0.036808444186764	0.00532132459042118	0	0.0438052616768136	0.021133910410776	0.00395634190217856	0.073	0.125710386335956	1.04068981495104
TCGA-A6-5659-01B-04R-A277-07	0.118079225389104	0	0.00602165570966967	0	0	0.359493974626611	0.0383594568280624	0	0	0	0.0575984474746298	0	0.00720467028683912	0.0847992552203582	0	0.196923438358428	0	0.0533342058535067	0	0.0781856702527914	0	0	0.422	0.0212200714318019	1.0743858069437
TCGA-CM-5344-01A-21R-1723-07	0.0707802925545812	0	0.0291004550200264	0.0355388977729879	0	0.109667364723203	0	0.0158504484681991	0.0444743733128099	0	0	0.00488600260499837	0	0.553474804131633	0.0480668341171409	0.0596742151284596	0.00160339381644961	0	0.0268829183495109	0	0	0	0.021	0.217642780309076	1.03768617843439
TCGA-AA-3831-01A-01R-0905-07	0.00142198652729927	0	0.0857197632352816	0.09708170828991	0	0.268398585485732	0.100218213253389	0.0189012669147311	0.0191048355042975	0	0.0346921907272566	0	0.0114387638500006	0.0514999282284261	0.0313627672059129	0.184370607051533	0.0400268615537928	0.0102699422676645	0	0.0222726287322859	0.00951544022923734	0.0137045109432496	0.038	0.176361021742931	1.01138796331544
TCGA-A6-2672-01A-01R-0826-07	0.0335303615060423	0	0.00240909661779041	0.157537713121092	0	0.124498779042542	0.0994107341238835	0.050297087294352	0.00810749983272933	0	0.0578345038200517	0	0	0.237080119552885	0.0597860573271235	0.0681515590239105	0.00141431713565633	0.00396015218469262	0	0.0813642934639132	0	0.014617725953336	0.019	0.223948598204903	0.999249272595
TCGA-DM-A0X9-01A-11R-A155-07	0.00347342809340294	0	0.00806936796125376	0.290547607005284	0	0.258966576788405	0.0890966710829189	0.0658830038122178	0.000663506973878652	0	0	0	0.00734091614166949	0.0334046322683834	0.0934728764060768	0.0904482597153713	0.0448933452934604	0	0	0.0137398084576771	0	0	0.136	0.0840280424035249	1.08410107795093
TCGA-D5-6541-01A-11R-1723-07	0.0251332689366471	0	0.021430294940703	0.153336595479597	0	0.0735646551861512	0.0559205276061856	0.00848026839983135	0.0437718191849836	0.00372579123873611	0.000977997269789506	0	0	0.267869895331566	0.138653022620312	0.171062194834962	0.0121613442131603	0	0.00746612322444907	0	0	0.0164462015329261	0.13	0.0858673742986859	1.06795810397047
TCGA-A6-3810-01A-01R-1022-07	0.0627427580004525	0	0.00614886856028144	0.0732735102591401	0	0.135939980797629	0.068005062452014	0.0150628966137658	0	0	0	0.00947934570796191	0	0.300741456994542	0.071762019182908	0.122320383993139	0	0	0	0.079292774530801	0.014341427117611	0.0408895157897545	0.034	0.191355632895317	1.01622109110064
TCGA-A6-4107-01A-02R-1410-07	0.00474012833852578	0.0144470280554935	0.0557680376763089	0.0222523518838936	0	0.269532495479521	0.00522431122488647	0.0441699291596128	0.0585781183805939	0	0	0.00392048017014443	0	0.162098583101505	0.0626889082471703	0.135630179136212	0.136796500612512	0	0.00691681633141745	0.0172361322022017	0	0	0.08	0.118929245834855	1.03735143434286
TCGA-AA-3875-01A-01R-0905-07	0.0756856752910271	0	0	0.0852231578462843	0	0.157685647425087	0	0.0746291586061872	0.0308123624725441	0	0	0.0184351613646031	0	0.077562535682235	0.0658123979355703	0.12594256202195	0.0508903088929336	0.0167764907853251	0.0152805381159018	0.00501682401568947	0.0766300688564047	0.123617110688257	0.074	0.123633868722052	1.03322034427259
TCGA-G4-6295-01A-11R-1723-07	0.0721683684416113	0	0	0.252556999451203	0	0.0777215929488615	0.174104997556856	0.0507927651132443	0	0	0	0.0285649436737389	0	0.0535261049634547	0.108051860497131	0.120822058554829	0.034487935883736	0	0.0272023729153334	0	0	0	0.056	0.148118666703773	1.03132431512809
TCGA-DM-A28F-01A-11R-A32Y-07	0.0686683626739932	0.0119136039955403	0	0.095433721020757	0	0.303365472075908	0	0	0.00994241779068851	0	0	0	0	0.20295713570515	0.194033804059349	0	0.0362632949682495	0	0	0.0552720353821073	0.0221501523282567	0	0.167	0.0718553150783741	1.08384949296154
TCGA-CM-4743-01A-01R-1723-07	0.0133693373926036	0.0132667615209767	0.00135641196408139	0.15922586256859	0	0.0092377469941093	0.14124919599215	0.0467857296035571	0	0	0	0.17659474486978	0.0175747843717381	0.0439606365402726	0.161972758055925	0.0738376819800781	0.00168041392875815	0.0433653787020713	0.0810730074617444	0	0.0154495480535645	0	0.017	0.234722990666667	1.01199649435375
TCGA-F4-6808-01A-11R-1839-07	0.0905273696538673	0	0.036911884192545	0.100039617462911	0	0.231432998608136	0.207008875773387	0	0	0	0.0249000211223864	0.00741290874548197	0.00948351752062787	0.134446840378379	0.0466259446938758	0.0499155944092256	0	0.0244388657595751	0	0.00378622145469933	0.0231187601879821	0.00995058003692152	0.156	0.0757120997415351	1.0533104625591
TCGA-AA-A00U-01A-01R-A002-07	0.0232762351550801	0	0	0.193073883136279	0	0.325961948352182	0.0879357999608765	0.0687871281670482	0	0	0	0	0.0255442242787985	0.0985401147022456	0.0226556919514871	0	0.00110306839390194	0.046040179852899	0	0.107081726049202	0	0	0.123	0.0898816842476373	1.07625255762222
TCGA-AA-A017-01A-01R-A00A-07	0.0803071288184288	0	0.124863113959503	0.0291493129531493	0	0.255728469549788	0.0663372548656316	0.0495123198003198	0	0	0.0121065777844817	0	0	0.221772430189379	0.020091823356553	0.0528379848179096	0.0100895776656399	0.0292578523026628	0	0.0138778427771297	0	0.0340683111594238	0.01	0.276748314580754	0.974122528012878
TCGA-AA-A01X-01A-21R-A083-07	0.26258897536097	0	0	0.0725095501109587	0	0.2237852531431	0.00629723322640605	0.00247895392229493	0.0728581974107803	0	0	0.0782111220178266	0.00834162442983819	0.120240031575073	0.0221971795083087	0.0760907374908666	0.0213700780033926	0.0027907506903259	0.0301828703457925	0	0	5.74427640653309e-05	0.0649999999999999	0.140586332653003	1.04186613892654
TCGA-CM-5861-01A-01R-1653-07	0.0297994582033789	0	0.00435990522848643	0.231679812898309	0	0.17509516586966	0	0.0675742096619665	0	0	0	0.0617724717848402	0	0.208123991961909	0.139899483253018	0.0504727360330309	0.00152690678183181	0	0	0.019970565934508	0	0.00972529238906156	0.124	0.0892266230413688	1.07894763559564
TCGA-A6-5659-01A-01R-A278-07	0.0228201869565882	0	0	0	0	0.154910727132254	0.0520649085350872	0.0019305667556796	0	0.0198968735786285	0	0.016888101655472	0.0116001800773061	0.431467862328717	0.0569778722054302	0.135434075772512	0.0242788355875679	0	0	0.0623143884298786	0.00941542098487883	0	0.428	0.0208171137332147	1.12051444982104
TCGA-D5-5537-01A-21R-1928-07	0	0.000532270778954196	0.0679012762298302	0.0494360537679645	0	0.382086147278389	0.073446562126805	0.00652790822765436	0.0276007736794781	0	0.00159519758538049	0	0	0.0994329747062564	0.0345908407260216	0.13567013954965	0.100069427726091	0	0.00592220232534489	0.015188225292179	0	0	0.089	0.111151720551303	1.04274643548689
TCGA-CK-4948-01B-11R-1653-07	0.0169656470831754	0.013835078215348	0	0.0315556075202326	0	0.0939948760786772	0.042232042197259	0.0289628120213547	0.0334621452310205	0	0.0128796617149103	0	0	0.429260212806293	0	0.109406136943288	0	0.0710780122092764	0	0.105756706026495	0	0.0106110619526704	0.00700000000000001	0.293035565400144	0.983870683303335
TCGA-A6-3809-01A-01R-1022-07	0.0211047772618533	0	0.000651957984315093	0.110798138160371	0	0.261136888738559	0.0516522053950718	0.0458950481961122	0	0	0	0.0396953074871178	0	0.0750986026708424	0.106602744565323	0.197254286691185	0.0241911638997663	0	0	0.0454449343606793	0	0.020473944588804	0.041	0.172295142796488	1.0215778874265
TCGA-AA-3968-01A-01R-1022-07	0.047913401498494	0	5.0120589960551e-05	0.0777592852110594	0	0.171634464504244	0.129444772211606	0.0113921702387772	0.00258802013619117	0	0.00556584532622324	0.0321271268646922	0.00976096426359152	0.194521753517626	0.0860548800490057	0.158015919547968	0.013651188707613	0	0.0432759558003132	0	0.016244131532634	0	0.116	0.0940058935352732	1.04514903788385
TCGA-D5-6530-01A-11R-1723-07	0.0593236860466651	0	0.00467103168820007	0.0736669123682269	0	0.232632051737731	0.073746465072432	0.0077172594215171	0.0114752106327698	0	0	0.0117780951129993	0	0.249121528478204	0.0951521028755999	0.121086344173598	0	0	0	0.0596293123920567	0	0	0.05	0.16238810165727	1.02683514399895
TCGA-AA-3818-01A-01R-0905-07	0.050186202190592	0	7.18002987227715e-05	0.265732156507263	0	0.14674891985597	0	0.00817610274906377	0.0274507519404486	0	0	0.045232088930664	0	0.24606626518539	0.0330749668561715	0.061846481035161	0.041823358801934	0.0272136760340148	0	0.0231689763935705	0.0232082532210341	0	0.107	0.100207292809439	1.06161715733668
TCGA-G4-6315-01A-11R-1723-07	0.248676712754128	0	0.0337915087701658	0.108997769808472	0	0.241373982576886	0.0600893272311863	0.0135423664955991	0	0	0	0.0523991382348972	0.00788550071563622	0.0448259702047161	0.0252859640050153	0.0642768831658909	0	0.026684001708996	0.072170874328411	0	0	0	0.107	0.100238590445929	1.05794540981487
TCGA-AA-3562-01A-02R-0821-07	0.0262344977737023	0	0.0298671900417221	0.0658044711919829	0	0.21278481247697	0	0.0477404165620099	0.0430049827454765	0	0	0.011477547266556	0	0.213409157623892	0.0588271732739285	0.203386720313335	0.0347390047871452	0	0.0305480938677551	0	0.0163608515189618	0.00581508055656203	0.1	0.104862949540206	1.04704694916143
TCGA-AA-3872-01A-01R-1022-07	0.0658882789206378	0	0	0.0643496439620225	0	0.0523318613201864	0.0142553593100893	0.0393619196246512	0.0464074394215221	0	0.0143796410126245	0	0	0.350851040915675	0.0972348902677856	0.159733217610412	0.0108611596253463	0	0	0.08313141482783	0	0.00121413318121732	0.00700000000000001	0.29403291564168	0.976274739551081
TCGA-AA-3845-01A-01R-1022-07	0.068660811281012	0	0.0113787577161011	0.121737374779436	0	0.21052986674461	0.120414109480199	0.0466067397640669	0.00266065622810476	0	0.0149331703293205	0.0107508219530134	0	0.120269405071342	0.0673527868803127	0.105834575099056	0.000143692574566466	0.0232214338742428	0.00940398228031592	0	0.0446154824361649	0.0214863335081356	0.0679999999999999	0.137735541172051	1.02870572288416
TCGA-AA-A010-01A-01R-A089-07	0.105080726978214	0	0.0163815506342556	0.140582189881768	0	0.122132821447493	0.0607380237546024	0.0934347391250135	0.0139370252801089	0	0	0.0637693793139817	0	0.166186135466414	0.0675241994771261	0.111100201166479	0	0	0.0391330074745437	0	0	0	0.033	0.193623222893622	1.00902890749999
TCGA-AA-3529-01A-02R-0821-07	0.0307446918567733	0	0.0193351551677561	0.0533506352973057	0	0.121946520639539	0.0693355070334477	0.0110940687636441	0	0	0	0.025056941399366	0	0.16582007031329	0.0412964385872195	0.210672984256898	0.00314825803409739	0.000983359259529095	0.167479232853503	0	0.0254676683877897	0.0542684681498409	0.073	0.125940764403886	1.02769584970471
TCGA-A6-2675-01A-02R-1723-07	0.0901386877266425	0	0.00899504361154643	0.0489594657593968	0	0.139403474314406	0.00420023320344477	0.018560324358733	0.0361363451378256	0	0	0	0	0.334419423893038	0.067857060114022	0.202022589806849	0.000397842780317753	0	0	0.0489095092937784	0	0	0.02	0.220055822790257	1.01033007586159
TCGA-A6-5659-01A-01R-1653-07	0.0757077354615258	0	0.0140239403584879	0.0287521257679511	0	0.168369757266252	0.0921701443999189	0.020679397607442	0	0	0	0	0	0.359683808605223	0.0833792425449594	0.111847435433552	0.025466194012398	0	0.0199202185422898	0	0	0	0.024	0.210635106561512	1.01059654421651
TCGA-AA-A01R-01A-21R-A083-07	0.0117634111981273	0.00734155772892519	0	0.233158862755917	0	0.0982611743960136	0.0227668798805778	0.0512293594238334	0.0774319926910708	0	0	0.0974638205434714	0	0.228996554930001	0.0715197042889546	0.0461611140708904	0.00851951718857353	0	0.0453860509036441	0	0	0	0.00600000000000001	0.32392616976259	0.959891616055026
TCGA-A6-5664-01A-21R-1839-07	0.0613925980072264	0	0.0380798651626598	0.117561260908371	0	0.167135418638605	0.0173783231299581	0.0292614611671592	0.023794758377924	0	0.0183539571375444	0	0	0.131061723682818	0.0404844312168343	0.234857262796916	0.00361995875016751	0	0	0.0957980503213338	0.00269133804992154	0.0185295926525612	0.036	0.186279092797578	1.00904685862578
TCGA-AA-A02H-01A-01R-A089-07	0.016624711129911	0.021258458224057	0.00611619350707725	0.10464715751699	0	0.406426430901304	0	0.0327899409186155	0.00089655817066724	0	0.00982698196914408	0.000923208790868421	0.0378231703836411	0.141652009230092	0.0500862631927618	0.1012872765801	0.0339237455002201	0	0	0.0312861429238329	0.00443175106071771	0	0.176	0.0692128926971662	1.07237291950446
TCGA-AA-3862-01A-01R-1022-07	0.0190370552237615	0	0.000372853709509315	0.176495957515514	0	0.205143240803815	0.106989931539201	0.0382704597773388	0.0320101004655237	0	0	0	0	0.12769050991111	0.0802453077238295	0.111438981865263	0.00531929030339278	0	0	0.0238138055416168	0.0521668412088728	0.0210056644112507	0.157	0.0750078834869927	1.06215614925589
TCGA-D5-7000-01A-11R-A32Z-07	0.0737970099219969	0	0.026093894028033	0.098441359890306	0	0.181681786603588	0.0497046775092435	0.0479285479990589	0.0148259655708771	0	0.0287287359648908	0	0	0.205012534007622	0.062934277993868	0.0781376982120985	0.00665644016094149	0	0.0155407319981933	0.0328490665099291	0.0457394828039246	0.0319277908254279	0.027	0.202094768475188	1.00168704558528
TCGA-CA-6716-01A-11R-1839-07	0.110673471306216	0	0.00574126210517114	0.0315805351005013	0	0.129685175428041	0.135357740560443	0.0074165256774343	0.00137161348361783	0	0.0783786608805328	0	0.0174365102815075	0.351831488845297	0	0.0671509821545214	0.0148169163772552	0	0	0.0485591177994624	0	0	0.072	0.130964687257911	1.04293487405525
TCGA-AA-A01G-01A-01R-A002-07	0	0.0223067866893387	0.00647091794676557	0.0491099194039922	0	0.261525802644219	0	0.027083238419628	0	0	0	0.116605128553403	0.0430824527942739	0.30007433133007	0.0350002441159548	0.0307360298953343	0.0210287641123275	0.0214997783267178	0.000211196402341956	0	0.0652654093656327	0	0.249	0.051483226935835	1.08245149846608
TCGA-A6-5661-01B-05R-2302-07	0.0493775047983151	0	0.00333646669162075	0.0569172699711247	0	0.345657110774708	0.000569604853145753	0.0443740216027572	0.000353553404146281	0	0.0280901943247378	0	0.00593950140270289	0.0433027540025873	0	0.0498566853592806	0	0.0825963144040075	0	0.197719132658569	0.0645662212776885	0.0273436644746089	0.12	0.0914143139346059	1.06071379830616
TCGA-D5-6535-01A-11R-1723-07	0.0242926336705053	0	0.00126338362834628	0.0829968495760011	0	0.21635895513199	0.0675070321672968	0.0618405883207821	0.0168685532357406	0	0.026918528842838	0	0	0.195222630642871	0.0695034460822669	0.132780552810235	0	0.012282863002517	0	0.09216398288861	0	0	0.205	0.060328106921217	1.06829483301548
TCGA-CK-6748-01A-11R-1839-07	0	0	0	0.0218086890845421	0	0.100419144484022	0.0512157708133085	0	0.0189104808141345	0	0	0.00518556832133889	0	0.612236695965456	0.0168819136174792	0.0824129859183748	0.00530533437706799	0.00432890999187946	0	0.0671118983222299	0.00530355567175433	0.00887905261841262	0.00700000000000001	0.290382990803574	1.01769843581934
TCGA-D5-5539-01A-01R-1653-07	0.0549264367275998	0	0.00101936371935729	0.0129570167408973	0	0.187366928493476	0	0.00624099436730137	0.00638419996067295	0	0.0200628093611034	0	0	0.453124893111527	0.0534389468008154	0.109342199072342	0.00128652604147801	0	0	0.0802369510195951	0.000164820690438082	0.0134479138933959	0.00900000000000001	0.277779162569365	0.994554473755488
TCGA-A6-4105-01A-02R-1774-07	0.0413897408617908	0	0.00887523800037792	0.167793435705319	0	0.165467306438693	0.155628533264277	0.0502046936968582	0.000666768795524419	0	0.0309928978316761	0	0.00272969422098396	0.123538610175636	0.0525455562909517	0.156634977515591	0.00532614088363571	0.00526431106244631	0	0.00433853086758485	0.0132105432591645	0.0153930211294884	0.0629999999999999	0.141912232437163	1.02932247241956
TCGA-G4-6307-01A-11R-1723-07	0.197825744367597	0	0	0.0507544014226998	0	0.180986183424453	0.1418050799862	0.00762054001297939	0.0264015096349935	0	0.0311563650275136	0	0	0.179789044954168	0.0518981764790012	0.0628145368370356	0.0562469101542602	0	0	0.0127015076990993	0	0	0.0649999999999999	0.140569806624105	1.02699239722781
TCGA-AA-3970-01A-01R-1022-07	0.0822753987726666	0	0.0616278053028643	0.0798433667166824	0	0.284280115407805	0.0533392551425409	0.0412023926300668	0.00805693728872545	0	0.00866180650968031	0	0	0.113409973605147	0.0318557749986311	0.160853650124225	0.0437446792022204	0.0053324596379787	0.00880586103214069	0	0.0167105236286261	0	0.013	0.249956581364018	0.98242545778865
TCGA-CK-5914-01A-11R-1653-07	0.0477929947874115	0	0.00236095218471129	0.194159699029927	0	0.169112850861535	0.088715367552795	0.0723074662746953	0	0	0.000799287227387081	0.0280029123582655	0	0.140975733357437	0.103677527804376	0.121944237275108	0.00177446066513336	0	0	0.0283765106212182	0	0	0.094	0.108509133472219	1.05298432316037
TCGA-A6-5666-01A-01R-1653-07	0.0135746666545161	0.00303374976529785	0	0.0368588388314691	0	0.165779870054253	0.0519592454636318	0	0.0686847687616867	0	0.0828376660749223	0	0	0.360552647262712	0.0215774440736846	0.0722801653791082	0	0	0	0.0743680671084717	0.00916735185952624	0.0393255187107212	0.217	0.057666862730391	1.08479039117553
TCGA-4N-A93T-01A-11R-A37K-07	0.0468490893160804	0.0838548745361331	0.0621681852125401	0.2064912293224	0	0.271977560215039	0	0.0695793930176501	0	0	0	0	0.0290805442875672	0.0813336527837322	0.00775734511733589	0	0	0	0	0.129642448982141	0.0112656772093814	0	0.023	0.213632054595316	1.01472619325011
TCGA-CM-6171-01A-11R-1653-07	0.0570315911480213	0	0.00573205609751275	0.0273373208691151	0	0.30650249406924	0.040320202456176	0.0117526126640956	0	0	0.01361508088768	0	0	0.124025319992527	0.0725179914003479	0.145288191095999	0.0137189530609135	0.00425737939614407	0	0.0701771486913952	0	0.107723658170831	0.143	0.0810851028377883	1.05352750047818
TCGA-G4-6309-01A-21R-1839-07	0.0421961255347475	0.0183247404900932	0	0.025518872526097	0	0.307107347320896	0.0783657161189386	0	0.0247798177097525	0.00582363903321746	0	0.0137750229313075	0.00183807897573501	0.177846529711598	0.0319022524877977	0.121201324661001	0.00298978568241312	0.0736253039912478	0	0.0623533929507543	0.0123520498744041	0	0.114	0.0944727389257789	1.04843847151561
TCGA-AA-3697-01A-01R-1723-07	0.0893000631126607	0	0.037921303896444	0.0336742013851375	0	0.163279324989953	0.109331176942792	0	0	0.00340248941018835	0.0165866341653338	0	0	0.255491317613063	0.0472204763406113	0.148497873273916	0.0205662046994922	0.00797188002663044	0.00752911012075652	0.0592279440230204	0	0	0.036	0.18494411653569	1.01086668202789
TCGA-G4-6586-01A-11R-1774-07	0.0681375246524235	0	0.0107086874819678	0.389309044485754	0	0.0104370346411538	0.14039070082283	0.0704787238378914	0.0203732437095541	0	0.0839159593707627	0	0	0.0828463911025999	0.0444670137769959	0.0381801421754765	0.0199248472676401	0.0138312035269244	0	0.00699948314802572	0	0	0.017	0.231467720359291	1.01102855058679
TCGA-A6-3809-01B-04R-A277-07	0.074487179282704	0	0.0127907252985289	0.00461024839166348	0	0.346765990687159	0.00401296214256904	0.0210280687111017	0	0	0.0229842700497496	0.00809282987971581	0.00029070752474978	0.0287008225031563	0.0200373710271506	0.138565013100178	0	0.0415668491879963	0	0.233375483503717	0.0149637362117931	0.0277277424980675	0.069	0.135252082416081	1.04040955089006
TCGA-A6-6650-01A-11R-1774-07	0.02359845812613	0	0.0749672470526759	0.0389239332811634	0	0.33831638424919	0.0644870202814769	0.0787909654205517	0	0	0	0	0	0.157366765461523	0.055261368396085	0.106198356733541	0.0266311030896068	0.0201744179666112	0.015283979941445	0	0	0	0.083	0.115362560998452	1.043397195005
TCGA-AA-3544-01A-01R-1873-07	0.0447277648694635	0	0.00379527662436343	0.0833990804546867	0	0.0558602330055329	0.0273199803545285	0.0402218939405355	0.0274630123789799	0.00625490903885772	0	0.0483031800741019	0	0.34317166609296	0.0916058837815271	0.141102002053077	0.0124419798291782	0	0.0688176289891162	0	0	0.00551550851309065	0.072	0.13169401066572	1.04712037301656
TCGA-A6-A567-01A-31R-A28H-07	0.192528274040237	0	0.00576297844808045	0.038436672453134	0	0.303335212595241	0.0276557797788839	0.0305365181451886	0	0	0.0268911593634954	0	0	0.159727573565392	0.0547644359042258	0.11507756932038	0.0380409775985071	0.00141082395806145	0	0.00583202482917395	0	0	0.184	0.0671854209692389	1.06355780189642
TCGA-CM-6676-01A-11R-1839-07	0.0359771845844193	0	0.00589210768084552	0.0267462639642723	0	0.187240305489291	0.124582517161457	0.0088978640597627	0.0311418677423227	0	0.0284124255684794	0	0	0.392053854535438	0.0311456133477869	0.114404889218744	0	0	0.0113250834318437	0.00218002321533697	0	0	0.016	0.239682600246851	1.00094040447478
TCGA-AA-3672-01A-01R-0905-07	0.0746725790499293	0	0.00872331339880064	0.270890069086274	0	0.0711249479165582	0.140800025866475	0.018012130290427	0.0203294841806557	0	0.059994440027217	0.019528318283619	0	0.132260130250419	0.0842946286320642	0.068151380347541	0.014367900307642	0	0.00165210834392061	0	0	0.0151985440184569	0.00800000000000001	0.286296656067706	0.973140883376272
TCGA-AA-3553-01A-01R-0821-07	0.0117768357729641	0	0.036381688391266	0.119065303783988	0	0.114379033348986	0.140324313603777	0.0536821707529288	0.00135044119521882	0	0.00623646180566114	0.0246838168498896	0.0040963616158154	0.117224533829728	0.0844311291249722	0.109628265414798	0.0713799750824656	0.026399853238609	0.0534672555101432	0	0.000844254113625368	0.0246483065651645	0.51	0.0103481247437372	1.06922324525854
TCGA-A6-A56B-01A-31R-A28H-07	4.28986476507958e-05	0.00579204466999081	0	0	0	0.171614480523639	0	0.0127775572972861	0.0188981203189381	0	0.0243655296060089	0.0122795541050263	0	0.57809419542511	0.0263590064285792	0.117770487889687	0.0149132101434946	0	0	0.0111058138734947	0.00598710107109478	0	0.038	0.178138036249285	1.07631162834679
TCGA-D5-6927-01A-21R-1928-07	0.0354300656337443	0	0.00528216750115823	0.138257832698767	0	0.171683307140289	0.105422479646899	0.0468452494866392	0.00529465006453925	0	0.0488230901181623	0	0	0.134108044812729	0.0833190212482535	0.0875377918738436	0.0087446774878309	0	0	0.0603813075961333	0.0254804041576912	0.0433899105333201	0.05	0.162344405342464	1.02076255281597
TCGA-AA-A00E-01A-01R-A002-07	0.0987884554840062	0	0.0131668649148599	0.0568697407430232	0	0.140476489433147	0.063286129577866	0.0680494219926709	0.00949079019036113	0	0.0107379817142105	0.027634652179953	0	0.205118644919785	0.112607272034141	0.121753961843778	0.0388030653980661	0	0.0332165295741322	0	0	0	0.00800000000000001	0.286536790429101	0.966900023368249
TCGA-AA-3814-01A-01R-0905-07	0.0397342140462048	0	0.00153057625368285	0.0788158202863789	0	0.214216620268924	0.0291714385615943	0.0372215919717329	0.0137472084888933	0	0	0.00504830095125831	0	0.218268547646623	0.0559178943549139	0.153701421748697	0.0460307313366747	0	0.0238865944219059	0	0.052808438360327	0.02990060130219	0.0649999999999999	0.14101867734934	1.02990306264109
TCGA-A6-2674-01A-02R-0821-07	0.0990282092450407	0	0.00681956063564251	0.0309802504604677	0	0.0489218874191911	0.0135793661206204	0.0188826357519414	0.00124831087410343	0.00232646588731119	0	0	0	0.259217542367663	0.0280991659688498	0.107481704823102	0	0	0	0.240989527204546	0	0.14242537324152	0.017	0.231548312043125	1.01637534133494
TCGA-A6-2676-01A-01R-0826-07	0	0	0.00114187112557841	0.0922178168013136	0	0.108960830858832	0.144606654189456	0.0153179950562332	0.00515391096089858	0	0.0860789298813309	0.000801622036693623	0	0.205226613953522	0.136806055665619	0.164178934956317	0.00648281385189112	0	0	0.0040431607445315	0.019307450412372	0.00967533950541005	0.00800000000000001	0.28497865819417	0.973098759883058
TCGA-AA-A02K-01A-03R-A32Y-07	0.0365066733332324	0	0.00875294415099332	0.221889213065869	0	0.00144786264926902	0.0846931334095848	0.0152875627386512	0.000934554192251169	0	0.00537686631989369	0	0	0.266248651611901	0.0141835367079813	0.234690522479204	0	0.00850631054240853	0.00418043742365685	0	0	0.0973017313751038	0.36	0.0296890188543292	1.09082834105821
TCGA-F4-6570-01A-11R-1774-07	0.0313935711688541	0	0.00263685530509346	0.213228867186615	0	0.136627769384918	0.0190776149906411	0.0409858425742732	0.0453260775872554	0	0.0236204057729997	0.0233412949495957	0.00695288794364284	0.179925632644636	0.101084253771597	0.150027559311827	0.014057368047591	0	0.0111162716920793	0	0	0.000597727668380632	0.09	0.110496747168875	1.05384543628402
TCGA-DM-A1D9-01A-11R-A155-07	0.0179115382745091	0	0.0110056953086281	0.0433687846081643	0	0.309870802031284	0.114321110339982	0.0185936760043244	0	0	0.0561356519714099	0	0.00227370187105687	0.142488382523795	0.0697025923911949	0.13335441856472	0.07244509986628	0	0	0.00852854624465142	0	0	0.297	0.0405592016195391	1.06983657843781
TCGA-CK-4951-01A-01R-1410-07	0.00954950444225922	0	0.00257707838533525	0.098253884887977	0	0.166180795222605	0.0466915490039764	0.0632448547337379	0.03005409541085	0	0.0160376279378418	0	0	0.211259588567231	0.121571527443073	0.146608735478497	0.00825125004620305	0.00932046396227423	0	0.0703990444781391	0	0	0.00700000000000001	0.30122163398665	0.965837457584976
TCGA-AA-3956-01A-02R-1022-07	0.242827760732478	0	0.137617242722235	0.103321484721732	0	0.189763240702562	0.0438443366130404	0	0.0125075487617286	0	0	0	0.015523796353695	0.0278714953759123	0.0393579350369166	0.0623320842758619	0.0428056375466435	0	0.0305444120154205	0.0411925877751589	0	0.0104904373666163	0.002	0.457236471924573	0.889192374896572
TCGA-A6-2683-01A-01R-0821-07	0.0853064923062032	0	0.00112991073934135	0.0436981888596731	0	0.184051188752133	0.0394175307923975	0.0145242327083051	0.0759256585670304	0	0.121201888364677	0	0.00541121251473401	0.159921369378958	0.00879619245295496	0.142217640200931	0.0128401729861265	0	0	0.105558321376535	0	0	0.371	0.0277091273122934	1.07801856096519
TCGA-AA-3713-01A-21R-1723-07	0.217967832584429	0	0.082588831033266	0.0826764428065219	0	0.200453319971642	0.0371449294733668	0	0.00226265546704984	0	0.0331208829329499	0	0	0.117108503797284	0.0360631110707505	0.132968206789898	0	0	0	0.022270746525135	0.0353745375477083	0	0.003	0.425615553711293	0.904384510248473
TCGA-AA-3955-01A-02R-1022-07	0.0370612887345975	0	7.20658660695164e-05	0.00498898135374331	0	0.27158062599725	0.122353646159086	0	0	0	0.0181810919750975	0.0509201265872887	0.0245430984203425	0.139077000543596	0.0421503376043875	0.137421008627114	0.0521584086105103	0.0140825018271645	0.0426085022478152	0.0428013154459371	0	0	0.189	0.0639547035626257	1.05320451740876
TCGA-AZ-6598-01A-11R-1774-07	0.0287545350485877	0	0	0.0750561006143193	0	0.211527453141165	0.0137186783375228	0.00656386246039834	0	0	0.0470795922416369	0.0734369581857407	0	0.163245358241421	0.0971557674600968	0.171683390746575	0.0345204026354066	0	0.0772579008871295	0	0	0	0.013	0.249521013598422	0.985451262613182
TCGA-A6-6780-01B-04R-A277-07	0.0399484652237736	0	0.00170002891095167	0.0194451222816708	0	0.310797752587013	0.0608515953578533	0	0	0	0	0.0232001956625472	0	0.128572973747603	0.0853230652479811	0.139923421604243	0	0.0173071842089982	0	0.0878478370198369	0.0380379625202403	0.0470443956272881	0.05	0.162159839169373	1.02037213574969
TCGA-F4-6704-01A-11R-1839-07	0.00944702461544283	0	0.0225608220497826	0.076132312823355	0	0.246696706068183	0.0535955448079958	0	0.00584621325463206	0	0.00376903084629814	0	0	0.343505271103292	0.0502681830821994	0.128084444976395	0	0	0.0532636357843837	0	0.00683081058804083	0	0.28	0.0449260087179453	1.08475840778258
TCGA-CM-6163-01A-11R-1653-07	0.0704463459281426	0	0.0366171996113485	0.147548911101292	0	0.254651062920329	0.0508714303140244	0.0108983355233838	0.039224083033755	0	0.00775149966078749	0	0	0.0662240959121073	0.0553219953139651	0.116541254840944	0.0780898785372401	0.00718220848803824	0.00175724296878229	0	0.0255675832268414	0.0313068726190192	0.035	0.187713206956815	1.00911793625921
TCGA-AA-3869-01A-01R-1022-07	0.0406596480410616	0	0.00374441902724128	0.0793411598119859	0	0.163130627388433	0.0821415507497666	0.00387646570567191	0.00666793404872605	0	0.0353380235415732	0	0	0.262447001065209	0.0538167913955303	0.129708779926776	0	0	0	0.0832366543584045	0	0.0558909449396214	0.00700000000000001	0.293622478684189	0.967104649746137
TCGA-AA-3538-01A-01R-0821-07	0.034002959792519	0	0.0114595197550471	0.0033063388623551	0	0.201176684534796	0	0.0299199666302281	0.0195766794690157	0	0.0135792848233585	0	0	0.241126138492967	0.0481063134658924	0.20603862135927	0.0895119277550241	0	0	0.0607519551349973	0	0.0414436099245303	0.117	0.0934220523062303	1.05685237489061
TCGA-DM-A1DA-01A-11R-A155-07	0.0557772806644533	0	0.0133213749695111	0.205403798554354	0	0.0876255947474877	0.0553434083781495	0.0675416971398592	0.00367178535062577	0	0	0.044053455926847	0.00707195389190873	0.141358143560735	0.0985817146188829	0.133722700018058	0.0261569146017254	0	0.0603701775774026	0	0	0	0.084	0.11501948254258	1.03996275416852
TCGA-AA-3494-01A-01R-1410-07	0.0127463982152965	0	0.00285088784962074	0.0301066881388373	0	0.222628682233927	0.199968541106095	0.0211406794629398	0.00671224173300722	0	0.0789584749096033	0	0	0.193636732870169	0.0346985658967097	0.119306007038043	0.00150420210762853	0	0	0.0482399900110757	0	0.0275019084270464	0.073	0.12783815195168	1.03563435562119
TCGA-A6-2677-01A-01R-0821-07	0.0973975044474577	0	0.0102334946227558	0.0979174971522714	0	0.227272445020611	0.0716005978595636	0.0101583288285216	0	0	0	0	0.00446049768691554	0.230847645661099	0.0718620826234284	0.0781377786197092	0.0436398880479067	0	0.0341937097652508	0	0.0222785296645093	0	0.131	0.0854621658259685	1.05031627864285
TCGA-CM-6168-01A-11R-1653-07	0.0544151923523543	0	0	0.0574884456669027	0	0.188260939612615	0.00983894461654585	0.00215064909365626	0.0488773838401899	0	0.0214511334949541	0	0	0.253374575295332	0.0866802021740023	0.167640581233036	0.00846961017832503	0	0.000950273867514401	0.0453452141429831	0.0445750422504783	0.0104818121811105	0.027	0.203243105013041	1.00849056802357
TCGA-AA-3852-01A-01R-0905-07	0.0248425663272038	0	0.0012338576358297	0.136525042283332	0	0.205085110064464	0.00238715783068215	0.0178817179931327	0.0353526610540408	0	0.00472452931393084	0	0	0.257223059763761	0.0149891818620215	0.118078371218851	0.0253529348892057	0.00515618955018901	0	0.098344111476133	0.0528235087372237	0	0.124	0.0885520955319336	1.06194066995147
TCGA-AA-3851-01A-01R-1022-07	0.044209580944042	0	0	0.131671747911637	0	0.242201465154681	0.00591510251641484	0.0165649792538106	0.0378779944529127	0	0	0.0250422120540511	0.0175209147225355	0.118813838509243	0.120939132555616	0.149917302808356	0.0425195189967042	0	0.0262770103277103	0.0205291997922848	0	0	0.119	0.0924296917916883	1.05519045945947
TCGA-A6-6654-01A-21R-1839-07	0.0302097602965178	0	0.00124200700832026	0.0711676758886359	0	0.136590700370455	0.019226720117002	0.0280063998293496	0.0386080696537341	0	0.0248161762681307	0	0	0.37017334970303	0.0933952767416657	0.110664531051877	0.0144000035768927	0	0	0.0493582811733253	0	0.0121410483210636	0.00700000000000001	0.320152310971983	0.962740737967877
TCGA-DM-A28E-01A-11R-A32Y-07	0.0514363944491828	0	0.0226359066219924	0.0223273498315439	0	0.384280300298574	0.113035826171031	0.0858797865911661	0.00242066658288604	0	0.0125649233138861	0	0.00682114211596907	0.069396660278518	0.0999863244891162	0.0925774448984634	0	0.00931575238840749	0.0273215219692632	0	0	0	0.421	0.0215921449311658	1.09030054519408
TCGA-A6-5665-01B-03R-2302-07	0.045969992291718	0	0.0110099497157349	0	0	0.27355662212433	0.0430866467455081	0.0151191582544856	0	0	0.0798863889784976	0	0	0.216724799525911	0.04505098871064	0.102816116915919	0	0.0136240043764699	0	0.0794876465563461	0.0373480231280208	0.0363196626764197	0.184	0.0674873540782461	1.05911060357085
TCGA-AA-3509-01A-01R-1410-07	0.0228731571410507	0	0.00303218952634766	0.000170404105649593	0	0.281299072286209	0.141671223517376	0.0144742389881633	0	0	0.0380632149838199	0	0.0208261257166606	0.132246393021926	0.0707181653678584	0.155569485095907	0.0132914416703308	0.00982635519742068	0.0355427256582211	0	0.0371499573522533	0.0232458503708058	0.188	0.0647704135352809	1.0511099862704
TCGA-F4-6459-01A-11R-1774-07	0.0554996859633535	0	0	0.00654664964627648	0	0.179698871784917	0.143863399436294	0.0195070598051364	0.00733046979471634	0	0.0274027575821362	0	0.0254604966258393	0.360108930788933	0.0229166385933878	0.120175267724257	0.00180603753397863	0	0.0214926819630391	0	0.00819105275773535	0	0.137	0.0835461606780183	1.06485720243847
TCGA-A6-6781-01A-22R-A278-07	0.0240545492079677	0	0.00269340896131184	0.0450322494957824	0	0.13484934472029	0.0272455407294514	0	0	0.00408929372232408	0.025467608652465	0	0.00143578416989814	0.488834092333715	0.0667549681429212	0.0788092875241569	0	0	0	0.0596282123159266	0	0.0411056600237892	0.018	0.22583692505855	1.02791568743839
TCGA-DM-A1D0-01A-11R-A155-07	0	0.0312759335208877	0	0	0.0240889551154728	0.00458609663008607	0	0.00858280185036432	0	0.023696126455156	0.0802939932749001	0	0	0.605670912265429	0.00537119286772824	0.118009792348406	0	0	0	0.0984241956715699	0	0	0.011	0.265866111937076	1.03759820921813
TCGA-NH-A8F7-01A-11R-A41B-07	0	0.00148852911966441	0	0.03946097675765	0	0.0122778212361947	0.105637265741902	0.000905681238095162	0	0	0.0863675526338104	0	0	0.325534299039919	0.035401265999043	0.145498844284994	0	0	0	0.195407231440072	0	0.0520205325086551	0.221	0.0572057492046844	1.10326740105335
TCGA-AA-A02W-01A-01R-A00A-07	0.0872861535298873	0	0	0.0492712110416383	0	0.311080073989397	0.183647480058349	0	0.00583558229441381	0	0.0540434080164925	0	0.0253233911957074	0.128866835264814	0.0695711614952831	0.0488010848177846	0.028184765134738	0	0.00125380549330899	0	0.00683504766818661	0	0.077	0.120784297474296	1.03836240016199
TCGA-AA-3524-01A-02R-0821-07	0.0824823463885563	0	0.00762422989471441	0.165657404374705	0	0.19413038270447	0.122902529920543	0	0.00227471250760024	0	0	0.0502131436370085	0	0.0526128729254448	0.0364666642735689	0.190404229469279	0.0237673051677413	0.00543962572751229	0	0.0236197915577304	0.0373368005856288	0.00506796086549733	0.049	0.164931497587694	1.01821211615498
TCGA-AA-3841-01A-01R-0905-07	0.142260937316879	0	0.00815194917789258	0.138049079613012	0	0.128150410320921	0.0116074891960231	0.0120203277141821	0.0771653746856181	0	0.0333068847787255	0	0	0.250489891580904	0.0717598756489595	0.0914542590530449	0.0113382438901881	0	0	0.013170861294037	0	0.0110744157296133	0.014	0.247430450423164	0.988909627137203
TCGA-CK-4950-01A-01R-1723-07	0.0229034228868331	0	0.0798733563127432	0.118253197705184	0	0.16803342385698	0.0782512421070154	0.0640552748815569	0.010737890441194	0	0.0245590916990237	0	0	0.167189437232019	0.0359598435421839	0.123669791509439	0.00609264667017505	0	0.0196333493840748	0.0237474335540561	0.0390602040647027	0.0179803941528196	0.032	0.194480645926278	1.00361981175947
TCGA-G4-6294-01A-11R-1774-07	0.0408084159256251	0	0.00933042289794405	0.0297548352733736	0	0.312499586205623	0.0948657122543231	0.0215566376546958	0	0	0.0431482792577604	0	0	0.193699684601125	0.0371010011389725	0.115835953705681	0.0915871149686862	0	0	0.00981235611619053	0	0	0.268	0.0477780776705747	1.06710743980438
TCGA-A6-3807-01A-01R-1022-07	0.016729791322275	0	0.000438465555656229	0.0898372349606462	0	0.165301047642017	0.0687879960969933	0.0519684330916893	0	0	0.0460143197540792	0	0	0.122322138170617	0.0909642439595751	0.15239073033527	0.0117016673206707	0.00314368960217357	0.0282751702240496	0	0.0685657010773257	0.0835593708869614	0.6	0.00160279692295712	1.08108032099533
TCGA-AA-3846-01A-01R-1022-07	0.0702127167048118	0	0.00996835717457288	0.0379141563219937	0	0.23445364560542	0.174600463614347	0.0408212831165608	0	0	0.0244049245057496	0	0	0.120717160440256	0.0120516805692323	0.157091846738805	0.0245671165088688	0.0313080577384171	0.0212824616309153	0	0.04060612933005	0	0.072	0.130325279913646	1.02511808049563
TCGA-F4-6703-01A-11R-1839-07	0.0300255494678256	0	0.00458460844262161	0.0422205890047133	0	0.215296389129264	0.0613037804511424	0.0222329551958631	0.00220231675774194	0	0.0429580996185802	0.000182591666704265	0	0.284784445080089	0.0803379296639882	0.14866485424293	0.0024877479720457	0	0	0.0436330692772197	0	0.0190850740292716	0.09	0.110681276332152	1.05167497166375
TCGA-AZ-4313-01A-01R-1410-07	0.00445270838124817	0.00191896144127072	0	0.228959705655897	0	0	0.106179552997733	0.00670780207252691	0.0393232339272716	0	0.080044007597286	0	0	0.273849682675021	0.0683724365725075	0.0531110828964174	0.0205020244565813	0	0	0.0999647617355436	0.0166140395906961	0	0.107	0.100151055934256	1.06060602653416
TCGA-F4-6461-01A-11R-1774-07	0.370285927207691	0	0.038622164277484	0.0379959242751334	0	0.157217797218524	0	0.0364194271892612	0.0289082522761029	0	0	0.0148669972807701	0	0.179585574571913	0.0432799746926981	0.0696143414075375	0	0	0.0232036196028844	0	0	0	0.001	0.560330614696271	0.828651496346946
TCGA-A6-3810-01A-01R-A278-07	0.0402216142949922	0	0.00472600699915028	0.0367282665322003	0	0.0795631277055471	0.0550113693016552	0.0323716159043229	0	0	0.00488198314294455	0	0	0.460344243183266	0.071063366786112	0.0879258944032049	0	0	0	0.0832323874720946	0.00720558690280737	0.0367245373717031	0.107	0.100475382207892	1.08734867848077
TCGA-A6-5656-01A-21R-1839-07	0.00249944417515901	0.0199233351473035	0	0.0321273680078551	0	0.0668388798821903	0.0893366518944258	0.0202532137389855	0.0270228998186861	0	0.0948859082259734	0	0	0.528452172650115	0.0488866898873698	0.00493803925749275	0	0	0	0.0648353973144433	0	0	0.021	0.216888859678481	1.03325080443592
TCGA-AA-3664-01A-01R-0905-07	0.0903718782882143	0	1.25287060778648e-05	0.109464063444987	0	0.328122251392196	0	0.0123691081965333	0.016773502561072	0	0.00285850320848732	0.0235751747063094	0.0298706013126377	0.19604395896011	0.0684598957548257	0.00253262618596627	0	0.0106750148611382	0	0.0965838235619203	0.0122870688595242	0	0.082	0.116171434001067	1.05140081268385
TCGA-G4-6317-02A-11R-2066-07	0.00841766486542049	0.0105161542258498	0	0.0130597637929017	0	0.0338066469548098	0	0.0096929584217946	0.0413364404905579	0	0.0215826193609183	0	0	0.735588893776534	0	0.0392313417875962	0	0	0	0.0867675163236167	0	0	0.074	0.123254541439158	1.15770060498391
TCGA-D5-6929-01A-31R-1928-07	0	0.0157463591122902	0.199845686920592	0.114917268037081	0	0.0708377787802686	0.0509662530254073	0.0311309699115378	0.0113428501194481	0	0.000120999023305566	0.00599803395646892	0	0.33181238222639	0.0444401756373067	0.102035591338102	0	0	0	0.0208056519118018	0	0	0.00800000000000001	0.285131351001462	0.981789277829566
TCGA-A6-6780-01A-11R-1839-07	0.0241619400609363	0	0.00263719649883814	0.136496505894591	0	0.0940330861262708	0.162119895859389	0.0490433769624468	0	0	0.000159381536366687	0.0568178153479528	0.00554739329007394	0.147293476359346	0.0805884839407281	0.160415881462821	0.0715443521585401	0	0	0	0.00914121450169982	0	0.00800000000000001	0.289031265934095	0.966149925968936
TCGA-A6-6648-01A-11R-1774-07	0.0053847924205614	0	0.108934260068425	0.0700555932830373	0	0.282107464545852	0.0893017337698977	0	0	0	0	0.0237115281933186	0	0.0769254709720766	0.0462827175471412	0.0757190982666964	0.0724303070585726	0.00224308922694235	0.146903944647478	0	0	0	0.027	0.200882156996219	0.997954775788132
TCGA-F4-6569-01A-11R-1774-07	0.111505510705492	0	0.00969889429253854	0.0524751408398543	0	0.112859524826014	0.00856948035165701	0.0189496158677352	0.0464665260487914	0	0	0.0116977770584933	0	0.435171978096207	0.0409028289642556	0.113850392755993	0.00198532170400506	0	0.0345359421959982	0.00133106629296548	0	0	0.00700000000000001	0.295729525984728	0.978096857156096
TCGA-AA-3966-01A-01R-1113-07	0.0459041097823259	0	0.0106005775849032	0.0836838714931956	0	0.0855126628448577	0.0543862764845591	0.0377541265816435	0.00898254759433937	0	0.0381551347876553	0	0	0.301323219836131	0.0281268849679131	0.0638861943000692	0.0181358353577275	0.0282034427459167	0	0.134100861348774	0.0317068672857928	0.0295373870041958	0.00600000000000001	0.338169806517265	0.947719006474142
TCGA-A6-2684-01A-01R-1410-07	0.0195187992885555	0	0	0.0880099407439792	0	0.0139254819648598	0.0108815556163095	0.0381010336578385	0.0862754060788123	0	0	0	0	0.430444473312287	0.0681086670898247	0.153611574701327	0.0387271684435458	0	0	0.0516279928439646	0.000767906258695541	0	0.012	0.256026105824215	1.00560078261233
TCGA-3L-AA1B-01A-11R-A37K-07	0.094370304806305	0	0.0139840613256353	0.0968386195036921	0	0.143019250414385	0.0452517644209624	0.0451611934022931	0.141987862083691	0	0	0	0	0.198370259441171	0.012099780226174	0.126315614616866	0.00813104825952093	0.00107018919594624	0.0671022084993677	0.00629784380399047	0	0	0.0590000000000001	0.145657428401103	1.02940516169827
TCGA-AA-A00A-01A-01R-A002-07	0.081709222336796	0	0.0151227404459191	0.120032568554743	0	0.219722355699511	0.0632608741691302	0.0324434284883608	0.0184922105214228	0	0.0343060523513626	0.0162186029837057	0	0.208229575063926	0.0719907188601186	0.0973076798538182	0	0	0	0.0211639706711862	0	0	0.026	0.204896846705236	1.00692016785988
TCGA-A6-6781-01A-22R-1928-07	0.0167678875732105	0	0.00246697836680254	0.0793046708430813	0	0.15233637137546	0	0	0.0130886222195879	0	0.0563184952037913	0	0	0.474433403371138	0.0736810307519284	0.121208865888253	0.00146684088040552	0	0	5.13882153107238e-05	0	0.00887544531102975	0.011	0.264378818834596	1.00588846193092
TCGA-AA-3950-01A-02R-1022-07	0.0070420018126309	0	0.00161545400562336	0.0733926646055386	0	0.188082178198943	0.0407358845037287	0	0	0	0.0244049411120668	0.00810502780359579	0.00801375518889477	0.274446812680019	0.0448842832475561	0.150788357476118	0.00466173722746368	0.00813599340385031	0	0.120535965704758	0.00153045468081376	0.0436244883483996	0.00600000000000001	0.347776210353123	0.944687141033052
TCGA-DM-A285-01A-11R-A16W-07	0.0322619170439244	0	0.000906937070067692	0.0138983318710259	0	0.205643352200086	0	0.00349940908459397	0.0341108110901976	0	0	0.0497736730718808	0	0.33487535955761	0.0485683785925033	0.192815382967029	0.014491170595123	0	0.0403891359510621	0	0.0287661409048961	0	0.292	0.04135142645168	1.08972853898266
TCGA-A6-2674-01B-04R-A277-07	0.0094557700589665	0	0.00422516249700738	0	0.0353029251215637	0.121072105619969	0	0	0	0	0.0517187330144803	0	0	0.37421770462871	0.00577652972530676	0	0	0	0	0.291307703466493	0.0382139568439524	0.0687094090235505	0.074	0.122746010879229	1.092051262566
TCGA-CM-5349-01A-21R-1723-07	0.0819503664385008	0	0	0.0240645623524375	0	0.0548371578701454	0.0270884948814079	0.0183455463398555	0.030398062214201	0	0.0269722252922017	0	0	0.584371834968967	0.0361708193442657	0.0981560767082972	0	0	0.0176448535897206	0	0	0	0.001	0.526715295403963	0.853270371323142
TCGA-AA-A00J-01A-02R-A002-07	0.0320125717581187	0	0.00109326404068706	0.0639917318283575	0	0.238084158779875	0	0	0.0475231281614669	0	0	0.0182274251427048	0.00404003137248769	0.257311159528487	0.055301245509688	0.187771495953514	0.0233618250185483	0	0	0.0712819629060655	0	0	0.054	0.153258563991532	1.03458174083896
TCGA-AY-6196-01A-11R-1723-07	0.0890337416883665	0	0.0254354331850155	0.12399020312291	0	0.168412730460269	0.00664018779709217	0.0681777614283304	0.0536258455750756	0	0	0.00195145061520291	0.0151152410083589	0.19066721598048	0.0845548933428228	0.148575137566749	0.0187761865095147	0	0	0.0023145115768063	0	0.00272946014300587	0.038	0.176237887649977	1.01881816995305
TCGA-AA-3534-01A-01R-0821-07	0.0270252551175209	0	0	0.0613877313202024	0	0.208384753735472	0.140067891479981	0	0	0	0.0806956103574656	0	0	0.171221213698795	0.0326474780513968	0.108427934387057	0.0384914178118639	0	0	0.109248787050612	0.0224019269896328	0	0.125	0.0875437153855647	1.05071485166445
TCGA-G4-6302-01A-11R-1723-07	0.0528436075710483	0	0.00481873509317119	0.104512088268496	0	0.142250900148953	0.0514012470022562	0.00931052961985266	0.0304140322134112	0	0.0105124992842572	0	0	0.362466772441456	0.0654310433540851	0.127421529452143	0	0	0.0386170155508702	0	0	0	0.096	0.106725352323168	1.0596420041759
TCGA-A6-6141-01A-11R-1774-07	0.0714399331182195	0	0.00152826150069011	0.225012698219949	0	0.166423952822686	0.0378248185986921	0.0257842474882648	0.0859634734993512	0	0	0.0499645735950363	0.0193046747668654	0.0599799383048626	0.11877477008257	0.0290596653025164	0.0619124189440911	0	0.0470265737562047	0	0	0	0.086	0.113248690269504	1.05680154983944
TCGA-DM-A280-01A-12R-A16W-07	0	0.0222327237321159	0	0.0421090655602341	0	0.198346531312488	0	0.00465632405816204	0.0199099624139864	0	0	0.00901307490421129	0.0313803084778525	0.358439280622171	0	0.0858416821990624	0	0.00449006389167208	0	0.186804548273891	0.000284566879487876	0.0364918676746659	0.213	0.058476331314684	1.09915471947107
TCGA-AA-3939-01A-01R-1022-07	0.0729380053804014	0	0	0.0668838877895958	0	0.196823019864116	0.129125608690748	0.0950945930934383	0	0.0015322149774946	0	0.000152368936837678	0.00603621456582758	0.100124525935945	0.0332709784956998	0.164816485702325	0.0458380782099449	0	0	0.076242734641589	0.00890415094079624	0.00221713277524106	0.081	0.117336587025608	1.03374642518309
TCGA-A6-2679-01A-02R-1410-07	0.00230606757447872	0.0149669193497761	0.0612624848887005	0.305727938189103	0	0.0771893711850207	0	0.0151530746039699	0.081592072253189	0	0	0.0948633818587003	0	0.211404361684931	0.0688450732010384	0.0237117819734795	0.00342311588881183	0	0.0395543573488012	0	0	0	0.073	0.124446152303831	1.05898389733346
TCGA-AA-3502-01A-01R-1410-07	0	0.00680263444546132	0	0.193569781057036	0	0.286724983477436	0.0087830918871411	0.0360471653063425	0.0534991466790313	0	0.022868322856284	0	0.00766147877221392	0	0.0364405648064004	0.213475839619086	0.0600732507451028	0	0	0.0614335724471795	0.0126201679012851	0	0.208	0.0598392032882795	1.07839417484018
TCGA-D5-6533-01A-11R-1723-07	0.0321296252770788	0	0.0137353238771436	0.0450564550424826	0	0.167908747745966	0.0472546425298881	0.067335087562671	0.00529079575583685	0	0	0.0126926431806756	0	0.273771270478906	0.106823978359945	0.12237209603546	0	0.0181667044511761	0	0.0843011516440597	0	0.00316147805871035	0.235	0.0536349177355439	1.07828417737814
TCGA-AA-3693-01A-01R-0905-07	0.0166612235330163	0	0.00221509430440159	0.109513291834495	0	0.203602475967626	0.0862450970591714	0	0	0	0.0269670361973362	0	0	0.164981696704907	0.0356845662498573	0.188836003759712	0.0647562967193678	0	0.0733897770478602	0	0.0271474406222493	0	0.144	0.0795388999848634	1.04779523766199
TCGA-AD-6548-01A-11R-1839-07	0.0596272758736668	0	0.033496806839748	0.0868328448991976	0	0.111371062072392	0.0948250003130336	0.0378564520763408	0.00447532087084037	0	0.0257020089871944	0.0172809500165178	0	0.281094857327843	0.0957760227633597	0.0897908564844729	0.00271757449028681	0	0	0.0353975509034038	0.00756786882929366	0.0161875472524091	0.012	0.256149998850339	0.983613030256905
TCGA-CM-6170-01A-11R-1653-07	0.0726403242712347	0	0.00240379138331921	0.0707864333964041	0	0.197821618330905	0	0	0.0058745737864894	0	0	0	0	0.313405482709891	0.110069633157574	0.14253771477166	0	0	0	0.0548504373105716	0	0.0296099908819514	0.073	0.12429869871438	1.05421934090386
TCGA-AA-3684-01A-02R-0905-07	0.0427072630099005	0	0.0469859230329024	0.147210209999555	0	0.193903418824266	0	0.00739472239655067	0.0657783060714549	0	0	0.0323480842812232	0.00297034439315492	0.235487445193932	0.0352211842641524	0.127740433071231	0.023370838941898	0	0.0186407428430698	0.000366544167420333	0.00162815051805873	0.0182463889912298	0.013	0.252347160105673	0.986164347793107
TCGA-AA-3941-01A-01R-1022-07	0.107655934922242	0	0	0.00344325261107711	0	0.412515658300381	0	0.0156365151513382	0.000993347098380493	0	0	0.0111683985626692	0.021358529898619	0.0213016811032564	0.0993240834907222	0.148181030870392	0.0717113274773288	0	0.021743125310737	0.014329216960583	0.0506378982422743	0	0.082	0.11714451087873	1.03890327460968
TCGA-A6-5660-01A-01R-1653-07	0.0154245804710059	0	0	0.0430365822712466	0	0.138462828060384	0.0759586712402777	0	0.00521714731740956	0	0.0765952677364476	0	0	0.372971823252781	0.0179225140087913	0.131658723746671	0.0238010762669026	0	0	0.0989507856280827	0	0	0.049	0.165426351583857	1.04041871984262
TCGA-A6-6652-01A-11R-1774-07	0	0	0	0.0582334262777928	0	0.173828211816331	0.0794204818363245	0.00143582348200279	0.0302079786705061	0	0.0322954257396674	0	0	0.532642562325725	0.00900698712372796	0.0204419324816648	0	0.0135201841704201	0	0.0472527287631702	0.00171425731266681	0	0.1	0.105369340790314	1.09473425655029
TCGA-CM-5868-01A-01R-1653-07	0.0363315354125471	0.0177099644052286	0	0.0430938295834106	0	0.136024538388829	0	0.0299672267738274	0.0717356469221833	0	0	0.044303778768305	0	0.439780595099886	0.038480579103808	0.137111349618376	0.00273356032731406	0	0.00272739559628481	0	0	0	0.129	0.0867186457518397	1.0884716749767
TCGA-CM-6164-01A-11R-1653-07	0.0185998832847925	0.0208575521191385	0	0.186797084124227	0	0.0296039030835883	0.0780452840633029	0.0485994294217471	0	0	0.0349979281436652	0.00414317600427064	0	0.379573348115144	0.115884197441105	0.0791143556902246	0	0	0.003783858508794	0	0	0	0.08	0.119453492225659	1.0629216432163
TCGA-AZ-6606-01A-11R-1839-07	0.100544161251263	0	0	0.0267774660501218	0	0.297968898706067	0	0.0163137586080047	0	0	0.0798467161570217	0	0.00936916568413211	0.150998476479535	0	0.120691066180398	0	0.0501108624143522	0	0.137707537553181	0.00967189091592379	0	0.261	0.0503127054440434	1.06859639678218
TCGA-DM-A1HA-01A-11R-A155-07	0.0306895125380464	0	0.00407738776554792	0.326740466080017	0	0	0.070380024398249	0.145002289563478	0	0	0	0.0911284506720445	0.0179023934518169	0.0347091624918808	0.126480846311481	0.0953634446746476	0	0	0.0575260220527906	0	0	0	0.209	0.0590062812159461	1.09338673590191
TCGA-G4-6323-01A-11R-1723-07	0.495088629013791	0	0.0231042873302576	0.0677152569061953	0	0.261335848604138	0	0.0395893118745294	0.00721320354693584	0	0	0	0	0.0524304404191527	0.0153446300579343	0.0152257896322993	0	0.0102859681546082	0	0.0126666344601582	0	0	0.001	0.548881139328062	0.838263341209603
TCGA-AA-3542-01A-02R-1873-07	0.0192896287328877	0	0.0388020921246273	0.0947232733628722	0	0.0485873203226645	0	0.0181188712958332	0.0316465418451588	0	4.87830311526092e-05	0.00279653419689597	0	0.3952261853656	0.0584299389877718	0.133464605687709	0	0	0	0.149736046052682	0.00359216850014176	0.00553801049400291	0.037	0.183695671288154	1.04049234802889
TCGA-D5-6924-01A-11R-1928-07	0.0655344135495329	0	0.00438049905151496	0.0342999305055718	0	0.10855379231806	0.0832076086629251	0.0483958325465503	0	0	0.040760279582028	0	0	0.338892084978823	0.115321269518636	0.117889436313492	0	0	0.0427648529728657	0	0	0	0.155	0.076385440699949	1.0695065413459
TCGA-F4-6856-01A-11R-1928-07	0.149845074920363	0	0.010981929587409	0.286816240557674	0	0.0743385800405435	0.0410049556844682	0.0239548130680526	0.0099255987571489	0	0	0.0230047641243933	0.0171591383758308	0.194792180942407	0.0636381458384399	0.0692183578485684	0.0110151405301185	0	0.0206650217604558	0	0.00364005796412607	0	0.011	0.262198616750501	0.982523067101571
TCGA-QG-A5YV-01A-11R-A28H-07	0.00829538876130617	0.0457646525405249	0	0.0324460686389596	0	0.320120247194803	0.165440817374044	0	0	0	0.063194132142064	0	0.0269652845802664	0.225612901868016	0.0696643113545043	0.00504272941810152	0.03745346612741	0	0	0	0	0	0.166	0.0725359602302088	1.0620646975975
TCGA-AA-3688-01A-01R-0905-07	0.022596541949752	0	0.00633412179988636	0.125384555965177	0	0.183322305771291	0.155631300370116	0.0154806646832662	0.0274635541595304	0	0.0563266448095947	0	0.0154432776491464	0.10637728650934	0.0526344238857837	0.150842250509955	0.0559378892509015	0	0.020852844241071	0.00359139010385079	0.00178094834133864	0	0.177	0.0689731552643243	1.05428998965815
TCGA-AA-3980-01A-02R-1022-07	0.0492868690513995	0	0.00433779815478921	0.219026414014698	0	0.157903494441963	0.135633428594568	0.0363634496278892	0.0333654760458882	0	0	0	0	0.033958925144987	0.0427372017856332	0.133801819227714	0.057369680149234	0	0.017913472804105	0	0.0336664068529878	0.0446355641041443	0.082	0.11655969904774	1.03893068458498
TCGA-AA-3525-01A-02R-0826-07	0.216454616350971	0	0.134245420242286	0.0313713598943187	0	0.172847460106118	0	0.00126290130161246	0.0066392799026668	0	0.00300058211175872	0	0	0.186567701116363	0.0579142337393371	0.123199191630859	0	0	0.00441700010901293	0.0402410205437578	0	0.0218392329509389	0.002	0.432085456313921	0.902644024933915
TCGA-AA-3994-01A-01R-1113-07	0.0183314987140285	0	0.0170797970506166	0.143408573670137	0	0.199737828269518	0	0	0.013575180607764	0	0	0	0.0137499803519354	0.133103443076819	0.0219047069634089	0.140020453652974	0.0311045578662433	0	0	0.17979669060617	0.0709540727167754	0.0172332164536108	0.052	0.157924484821269	1.02614421972302
TCGA-AY-4070-01A-01R-1113-07	0.0524746992326506	0	0.0850676857403977	0.0907909381996038	0	0.240950907831429	0.0504805981400678	0.142755050543047	0.0778538197024199	0	0.00624620624868064	0	0	0.0825774182248511	0.059605016202213	0.0437915597856671	0.0485064784922081	0.00546519475653978	0.0134344269002249	0	0	0	0.029	0.198150581820914	1.01703072683688
TCGA-AA-3495-01A-01R-1410-07	0.02910661292934	0	0.0947359767095814	0.105578259492442	0	0.284707140457117	0.141017899954261	0	0.00186365083548301	0	0.035021903855478	0	0.021929076966474	0.0647613812770814	0.0525426099508186	0.144421165807527	0.00352131751291603	0	0.0137480177985693	0.00704498645291203	0	0	0.031	0.197238773289963	1.00510015515331
TCGA-D5-6531-01A-11R-1723-07	0.0332339317869935	0	0.00714371231128843	0.221575282417901	0	0.0816383984687683	0.118189269714689	0.0465207350650775	0.0219400156794707	0	0.0140447487453193	0.0134863649968709	0.00303927400759687	0.120593069172442	0.140906851314164	0.0778190302828663	0.0323171133483157	0	0.0675522026882371	0	0	0	0.024	0.20921364055857	1.0045007543168
TCGA-CA-5254-01A-21R-1839-07	0	0.0175794318901486	0.0548217583991846	0.143707641527235	0	0.274739268365033	0	0.0124041374265842	0.058509566873427	0	0	0.00656619664135692	0	0.24044017196046	0.0557906257091138	0.103751378902755	0	0	0.0311942307188615	0	0	0.000495591585840239	0.073	0.123906204179396	1.0482101710123
TCGA-QL-A97D-01A-12R-A41B-07	0.0327265358485116	0	0.0252558440825711	0.247765171910577	0	0.144964681921055	0.114126414704714	0.0769015039143828	0.0509923289806252	0	0.0533923681040313	0	0	0.0367105673556824	0.0573631333516429	0.0831761885981442	0.020229427921396	0.0144704326357129	0	0.0419254006709543	0	0	0.101	0.104120637851732	1.06241325533161
TCGA-AA-A02R-01A-01R-A00A-07	0.0181055927741638	0	0.000868912163116129	0.165915794120891	0	0.120633398944815	0.137538311875521	0.0289361950883269	0.0138675717088341	0	0	0.0454217022993839	0.00844676779100749	0.108025931436212	0.169126065050316	0.092032870652198	0.0237511884344039	0	0.0673296976608115	0	0	0	0.00600000000000001	0.349309054971178	0.942524331717465
TCGA-CK-6751-01A-11R-1839-07	0.0227752985585868	0	0	0.190308051585691	0	0.124896684320165	0.0478865388710334	0.0795365282601064	0.0480323837739797	0	0.00372120603762153	0.00457190302274538	0	0.20795228405843	0.0291532601319475	0.082832854470431	0.0475286145956946	0.0316031390295357	0	0.0792012532840317	0	0	0.095	0.108161805476271	1.0504630771571
TCGA-F4-6805-01A-11R-1839-07	0.0269980944887292	0.0137915932132997	0	0.0743582966906823	0	0.215712910551673	0	0.00813227474373969	0.0949364936558248	0	0	0.0326652018674032	0.0237019942388617	0.0892534310209551	0.0351144176205975	0.179301432801329	0.133009584248933	0.0200919887274598	0.00595631269099564	0.0260832504987604	0.00289804071567502	0.0179946822250815	0.056	0.147906583041239	1.02336622930688
TCGA-AA-3696-01A-01R-0905-07	0.0627479589361604	0	0.00991331741123895	0.00794772316650912	0	0.285356903151004	0.0386332137491647	0.0357242984511805	0.0217229490146234	0	0.0810146332970532	0	0.0321754346699091	0.1104856834619	0.0402760492925828	0.211670327235944	0	0.0197787129387165	0	0.0425527952240134	0	0	0.187	0.0658490942424571	1.0558454646883
TCGA-A6-5662-01A-01R-1653-07	0.0581876539611571	0	0	0.0555841926638431	0	0.213005782061007	0.116057598879032	0	0.00658309831344181	0	0.0438754448115141	0.00298149566603285	0.0415675985392182	0.102845037105258	0	0.223807091799653	0.0903823868371435	0	0.0222222848291803	0	0.0229003345335195	0	0.401	0.0242756321956091	1.06473511187712
TCGA-AZ-6601-01A-11R-1774-07	0.0896168909251712	0	0	0.0820275419235125	0	0.147653432647683	0.0195115430371221	0.0360963395694863	0.049234847446894	0	0.0181416850383839	0.0115220428975731	0	0.312159315946634	0.106409569742989	0.115437500323951	0.00848464057151575	0	0	0.00370464992908369	0	0	0.018	0.226646634324711	1.00367391925276
TCGA-A6-2684-01A-01R-A278-07	0.000854137517991545	0.00440738561165885	0.00220710936362049	0	0	0.186657893088064	0.00863558922923127	0.00607501348925422	0.0140653119799875	0	0.00554837197681764	0	0	0.363459921449259	0.0584584555710437	0.150326711676918	0.0473319839235381	0	0	0.0859182570827288	0.0660538580398866	0	0.232	0.0541767680121461	1.09481239433046
TCGA-AA-3556-01A-01R-0821-07	0.0635185644775109	0	0.00126422435740306	0.0418756421551999	0	0.257603332677168	0.0257390988475146	0	0.0177501709041434	0	0	0.0595241619014164	0.00233324921097347	0.1472137444956	0.0787876711033218	0.179471363592475	0	0.0342577783084793	0.0717222698238843	0	0.0036507334913248	0.0152879946535852	0.089	0.111519150419068	1.03861977345317
TCGA-DM-A1D4-01A-21R-A155-07	0.0243177474777467	0.0197611925029552	0	0.0797660418624682	0	0.443040674643452	0.103296659618876	0	0.0160790573890467	0	0	0.0530509339978407	0.0110232934733509	0.111683636419138	0.0573563883297462	0.0383769877554881	0.0256741407824195	0	0	0.0165732457474717	0	0	0.345	0.0323313414557487	1.09909431436178
TCGA-RU-A8FL-01A-11R-A37K-07	0	0.0357078829976766	0	0.0893779048781448	0	0.206110107664668	0.198642714336252	0	0	0	0	0	0	0.288997906196863	0.0278075962913191	0.0865504441389745	0.0330237308734275	0	0	0.0141227835885548	0.0196589290341205	0	0.193	0.0630181197551637	1.06738018396129
TCGA-AA-3975-01A-01R-1022-07	0.0251295438424834	0	0	0.0589756840708685	0	0.183123564523157	0.115727030198371	0	0.0041266953652907	0	0.0294254589527415	0	0	0.274298829457043	0.0532553450454239	0.218116598940299	0.018402213973125	0	0.0175118664599593	0	0.00190716917123754	0	0.131	0.0857907909727965	1.06055936217706
TCGA-F4-6460-01A-11R-1774-07	0.107085702837046	0	0.0119208323555	0.074758581646029	0	0.279615309116529	0	0.0440699997389464	0.0558289085676095	0	0.0164144736767999	0	0	0.188633887983621	0.0935544104403201	0.083569187557594	0.0369765136431462	0	0	0.00757219243685875	0	0	0.032	0.195782758661272	1.01311847643729
TCGA-AZ-4308-01A-01R-1410-07	0.0393730519552691	0	0.0052420812972143	0.0714992127282539	0	0.0464924627083146	0.0044376697526175	0.035301790492195	0.0555653232536265	0	0.0123198961063593	0	0	0.428064151278486	0.0745654931211968	0.104138119825041	0.0161620775734802	0	0	0.0907663395479913	0	0.0160723303599548	0.016	0.241586471020209	1.0106097511471
TCGA-AA-3972-01A-01R-1022-07	0.0310881565020184	0	0.00630773078457884	0.0731192869429061	0	0.227817909586633	0	0.00992582862524465	0	0	0	0.0229017603741888	0.0402766244192209	0.208752856906421	0	0.149495404624659	0.0257274763594701	0.0552666553162016	0	0.0933220601036747	0	0.0559982494547826	0.136	0.0842213527661244	1.05659858296559
TCGA-AA-3858-01A-01R-0905-07	0.0214634563960579	0	0.0348575103693034	0.0991677409032136	0	0.22618241971028	0.019773148729025	0.0484303684233525	0.0446136873558296	0	0.00866170755351431	0.00774052443820984	0	0.172624851834539	0.0665117491997844	0.128815354042667	0.0668817386763129	0	0.0399674679791095	0	0.00748125378360391	0.0068270206051975	0.082	0.116178862907451	1.03848262050245
TCGA-AA-3679-01A-02R-0905-07	0.0340035873695656	0	0.0223920991637659	0.0804497667731389	0	0.255874894717854	0.0955211921848291	0.0166383089353298	0	0	0.0807898818610671	0	0.014784346208282	0.116760160432805	0.0883548861591166	0.15800183679502	0.0077277809003108	0	0.0266401999916372	0	0	0.00206105850727748	0.114	0.0952014063157226	1.04680536054372
TCGA-AY-5543-01A-01R-1653-07	0.0552649352368732	0	0	0.196477869264763	0	0.168922049459402	0.00358599517906948	0.0589186270996223	0.0119437897265619	0	0.00705708707130682	0	0.0148603313121006	0.185132113212437	0.0940862549783411	0	0.0110508126159003	0.0293026622747314	0	0.148666650560627	0.014730822008264	0	0.0590000000000001	0.146516398642953	1.03983600389483
TCGA-AU-6004-01A-11R-1723-07	0.0607424803185417	0	0	0.057182464444141	0	0.13167706762744	0.0842541292053636	0.00367528304390784	0.0281295072160625	0	0.0685075961027933	0	0	0.344967248029475	0.0578627514639104	0.100276036041087	0.0288549911573147	0	0	0.0314727256594253	3.25968002421679e-05	0.00236512289029522	0.027	0.200805735711438	1.01360010899916
TCGA-DM-A28A-01A-21R-A32Y-07	0.0518701232332942	0	0.00110903421928246	0.113560079600336	0	0.150899633896686	0.0149301617818007	0.0778549712637762	0.00161602992621748	0	0.0195324107450336	0.0195942032470108	0	0.174730458548656	0.146500571340362	0.21670321206964	0	0	0.0110991101279044	0	0	0	0.143	0.0813580321725443	1.06672902258444
TCGA-AA-3848-01A-01R-0905-07	0.103654870470136	0	0.0148726017658361	0.164485312331845	0	0.0802697950781582	0.172847383119674	0	0.0289857841944996	0	0	0	0	0.265911558845214	0.0506213137814187	0.0817899236308022	0.0210078862846565	0	0.00415708785927274	0.00566190175669766	0.00573458088178894	0	0.049	0.164526965384772	1.02043118267729
TCGA-AA-3667-01A-01R-0905-07	0.0301631135362326	0	0.00091094253084392	0.150413189985826	0	0.0713148015987507	0.10404866129319	0.0282143297119244	0.0323785777345965	0	0.00683709138276858	0	0	0.257528956259743	0.0307922496069737	0.0892705289768676	0.0170449609560651	0.0146039103175551	0	0.115509079830724	0	0.0509696062779389	0.1	0.105112611823304	1.05038243405163
TCGA-AA-3811-01A-01R-1022-07	0.105004702009745	0	0.0559516523687885	0.0936336816590511	0	0.30022994253738	0.00336870202859958	0.0612047641676407	0	0	0	0	0.0126897061346772	0.0757128342839829	0.0687258075058862	0.146310550107238	0.0122590658458916	0	0	0.0373904263667609	0.0259555453127104	0.00156261967164815	0.016	0.240522460373806	0.988921039294749
TCGA-G4-6303-01A-11R-1774-07	0.0377590874805639	0	0.00428167089334953	0.0567243495969398	0	0.162241927849618	0.0440896296862963	0.0272881236720606	0.0228302074234903	0	0.00869874890186387	0	0	0.394281650141448	0.0328879742090202	0.0741328097533819	0.0422134178350836	0.0328299167470917	0	0.0534978409062817	0.000661260293575856	0.00558138460993506	0.072	0.131464851439657	1.05377279320813
TCGA-QG-A5Z2-01A-11R-A28H-07	0.269252380824335	0	0	0.193915978192778	0	0.224017255322152	0.00351483435201078	0.0599210314799964	0.0256890952654413	0	0	0.0432400184134015	0.0210528406926492	0.0509693507781567	0.0461725131759796	0.017051385826354	0.00426287935022261	0.0121834925781685	0.0287569437483548	0	0	0	0.00700000000000001	0.309605005493867	0.972055504119612
TCGA-CA-5256-01A-01R-1410-07	0.0485746278613707	0	0.00673598399553772	0.235294022333987	0	0.158423560061666	0.207691363747234	0.0190176025790077	0	0	0	0	0.00590366523248435	0.0764302734220074	0.0601995874893391	0.0630225570407517	0.0995779476406723	0	0.0191288085959425	0	0	0	0.072	0.1283709421453	1.03576512627433
TCGA-G4-6317-01A-11R-1723-07	0.0155319723270966	0	0	0.399166422345889	0	0.188698969526111	0.13727354103957	0.0429616080644309	0	0	0.0365722622174534	0.00438601213310761	0.0254033940445464	0.0883142423110386	0.0100413122349868	0	0.00885630917647016	0	0	0.0382316869795878	0.00456226759971195	0	0.3	0.0397131139208825	1.12396081278263
TCGA-CM-5341-01A-01R-1410-07	0.0272232168862661	0	0.00199526884893649	0.0373108441250402	0	0.14311703009241	0.0539866471271585	0.016351091651667	0.00168083409970035	0	0	0.00259552320215321	0.000728213492188551	0.18082802732242	0.0858361318800621	0.307985795898249	0.0559500345524376	0	0	0.0375828600762878	0.0320326025327945	0.0147958782122289	0.002	0.474209236293554	0.880243306215857
TCGA-F4-6854-01A-11R-1928-07	0.0325965740122992	0	0.00411139700116679	0.152588465231284	0	0.159092756791486	0.117254512865303	0.0050270265874411	0.0241126988679767	0	0.00820016203103257	0	0	0.304856534762814	0.0731082763103808	0.0857997226161277	0	0	0	0.033251872922688	0	0	0.072	0.129152077208664	1.04566861495432
TCGA-AA-3947-01A-01R-1022-07	0	0.054271837160373	7.93669449068829e-05	0.00554752982851613	0	0.160567254384041	0.00754227229798093	0.00893427813489984	0	0.00163974468873815	0	0.0167070763344998	0.00391167025976807	0	0.101560332944669	0.28023349940632	0.0367554986685315	0.0283959387970462	0	0.219875198608738	0.0195911623956434	0.0543873391453272	0.018	0.226488080488161	1.00160286918992
TCGA-CM-6162-01A-11R-1653-07	0.0585069646558653	0	0.00691495618424231	0.0942906190755791	0	0.216250140934705	0.0471313079383363	0	0.0065641941059114	0	0.045808171256018	0	0.0143033710403445	0.186055959474231	0.0857751848717911	0.123508698563504	0.00303011243685503	0	0.0317515115048674	0.00813373025439134	0.021065996904924	0.0509090807984344	0.029	0.198088820124985	1.00400393501436
TCGA-AA-3867-01A-01R-1022-07	0.0905907111685688	0	0	0.000685628945642719	0	0.21364976299753	0.0756198201099137	0	0.0105913958639731	0	0.0479942149552828	0	0.0508988084715352	0.127723080142351	0.0752823421761797	0.206676917617413	0.0380547965711345	0	0.0205962131968742	0	0.0416363077836017	0	0.051	0.161197206412963	1.01242977530506
TCGA-CA-6719-01A-11R-1839-07	0.0489050053292688	0	0.00631863246611644	0.0767793261334623	0	0.102804151577897	0.0273814715537713	0.0279973399045965	0.046250900974212	0	0.000434071729657328	0	0	0.453077198530099	0.0922884919070348	0.106829642504883	0.000758578153099075	0	0.010175189235902	0	0	0	0.036	0.184237759423687	1.04149825962833
TCGA-NH-A50V-01A-11R-A28H-07	0.0594276994377375	0	0.0399961437912972	0.0480574328574655	0	0.317722685381323	0.0084267446359259	0.0693769702764459	0.0672739690492713	0	0.0506220767083613	0	0	0.090916396464431	0.0813164251301004	0.107751848234249	0.00672801822493441	0	0	0.0521513603764612	0	0.000232229431997022	0.071	0.133371064969036	1.04077998387284
TCGA-AA-A01C-01A-01R-A00A-07	0.0284032983587624	0	0.00110624165716384	0.0710669047546633	0	0.182999227808564	0.089028795924436	0.0349117786684457	0.0103455440886419	0	0.0348692919474405	3.52742525377505e-05	0	0.227459110252241	0.100048234783974	0.184542862015848	0.0149691583297371	0	0.0202142771575445	0	0	0	0.119	0.0922159676011514	1.05457600318521
TCGA-AA-A02F-01A-01R-A089-07	0.097232235723739	0	0	0.0317150732766413	0	0.15728924197321	0.130960588619869	0.00625677543649835	0.0111848362094403	0	0.0919563610690105	0	0.0225510928835713	0.211717061497068	0.0181587748971978	0.0800236789326274	0.0183094045642774	0	0	0.115711025856798	0.00693384906005137	0	0.451	0.0182555169332809	1.0772752386661
TCGA-AA-A03F-01A-11R-A16W-07	0	0.0709442102018806	0.0796337864188661	0.0772215583878048	0	0.187107645260316	0	0	0.124558772029336	0	0.00259494887242755	0	0	0.289915531737366	0	0.00505844380425088	0.028096507435908	0	0	0.134868595851845	0	0	0.017	0.228744717165975	1.00213386531171
TCGA-AA-A00O-01A-02R-A089-07	0.0198922094576261	0	0.00470827579284443	0.0501219435239625	0	0.131499688520907	0.00505356527211617	0.0186398763781267	0.0576768807638921	0	0.0510931356838402	0	0	0.503838737961601	0.0586767810479704	0.093566690307907	0	0	0.00523221528920684	0	0	0	0.038	0.175779708777189	1.05471453685955
TCGA-AZ-4615-01A-01R-1410-07	0.0507284027708299	0	0.00834519953600167	0.253591201409311	0	0.207124644817965	0.121845976526315	0.0225265552768023	0.00244909922449789	0	0.0402096018537922	0	0	0.0886601372697949	0.0887976244717718	0.0886476174818168	0.0119794079277516	0	0.0150945314333502	0	0	0	0.00700000000000001	0.319399725244408	0.959235512787909
TCGA-AA-3854-01A-01R-0905-07	0.0464433441676349	0	0.0097018166903938	0.064313087908523	0	0.312459364450769	0.0279674629980718	0	0.0117100259723086	0	0	0.034955755476333	0.00522307267596021	0.120410105746165	0.0407456632482196	0.202925484924083	0.0391345779197375	0.00587946735092386	0.0176799396969191	0.00321814769564404	0.0374555475966088	0.0197771354817044	0.109	0.0978476071241886	1.04487195881425
TCGA-AA-A01V-01A-23R-A083-07	0.0417872082334375	0	0.0168450235703231	0	0	0.454478466615414	0.16119607486901	0.0505530976830506	0	0	0.0386915992172228	0	0	0.19429900952165	0	0	0	0.00895403673156927	0	0.0331954835583227	0	0	0.077	0.120612584879401	1.05745513894355
TCGA-AA-A00D-01A-01R-A002-07	0.085644493433635	0	0.0109019354630381	0.141530760285904	0	0.206273456640028	0.0486125083317541	0.0246201926040222	0.0493371401771621	0	0	0.0450179902361716	0.00325342159618396	0.0677399486695274	0.111832358406216	0.110063418912945	0.0504819849051327	0	0.0446903903382797	0	0	0	0.05	0.164151379812918	1.02259946103039
TCGA-A6-5657-01A-01R-A32Z-07	0.317569809400736	0	0.0715432481410514	0.102857122695955	0	0.120941834315024	0.0147849827042817	0.0685012177455415	0.0559542986943646	0	0	0.0253533629111076	0	0.0824885760987944	0.0593513178129053	0.0272338849134725	0.0150079836932864	0.0233155899399241	0.0122191873991406	0.00287758353441478	0	0	0.073	0.124397415374293	1.06604593771874
TCGA-AA-3522-01A-01R-0821-07	0.0969664900601423	0	0.131088257958202	0.0619897153191281	0	0.277755511481409	0.00141762757131617	0.0650268479473939	0.01537163376109	0	0	0.0170120206555406	0	0.0334404519126409	0.0508082651862874	0.0746457929757403	0.0895424488952226	0.00348764186085994	0.0565851112343576	0	0.0248621831806687	0	0.00600000000000001	0.321914383744026	0.952931657984755
TCGA-AA-3877-01A-01R-1022-07	0.0263199039736874	0	0.0021997643340409	0.0672315090298332	0	0.225953979399729	0.069081839599376	0.0574617210999703	0	0	0.0502464697438384	0	0	0.109504613697583	0.0960751366072035	0.117725797977891	0.0205766784209967	0	0.00165003082090046	0	0.0325825146505992	0.123390040644351	0.04	0.173254298200626	1.01789342177662
TCGA-D5-6923-01A-11R-A32Z-07	0.0120699245590413	0	0	0.0497754134334001	0	0.138434419621651	0.0150273886721705	0.0310465553179153	0.00187880857212332	0	0.0451587315663914	0	0	0.488035103303772	0.0123750062757614	0.0676152489035946	0	0.0266718508146734	0	0.111911548959506	0	0	0.00600000000000001	0.34401348087143	0.962507888730032
TCGA-AZ-6599-01A-11R-1774-07	0.0922579961748745	0	0	0.286780991359904	0	0.377638593708052	0	0.0168765424030413	0	0	0	0	0.0307616956098557	0	0	0.0646678582028653	0	0.0232546362838505	0	0.103145982624223	0.00461570363333325	0	0.091	0.109825632702677	1.08198183931763
TCGA-D5-6922-01A-11R-1928-07	0.0349724134601785	0	0.00303060406636746	0.0869497893176358	0	0.136727219339897	0	0	0.0606067657983789	0	0.00562103271959118	0	0	0.308997576878887	0.141014949506396	0.168674259405144	0.0119330116470092	0	0	0.0414723778605148	0	0	0.032	0.195607165376619	1.02543517227758
TCGA-AA-3692-01A-01R-0905-07	0.028120241010864	0	0.00198073735830922	0.0520308697703231	0	0.269681722823377	0.0725085195138154	0	0.0101928884993772	0	0.00350825359294726	0.0027173545463979	0.00653587221577713	0.163644348387907	0.0187264303290886	0.134842112314794	0.0493323775018512	0	0	0.0930676725106221	0.0818407990692037	0.0112698005553459	0.0570000000000001	0.147142798010034	1.02446870725126
TCGA-A6-3810-01B-04R-A277-07	0.0477985776510293	0	0.004633384667877	0.0155073604227142	0	0.178358982868493	0.0570470350625545	0	0	0	0.0460224272161867	0	0	0.0961092369263859	0.0837030479489937	0.213981315085375	0	0	0.00883652701308908	0	0.244775761411775	0.0032263437255274	0.284	0.0431662051036737	1.06536901305949
TCGA-4T-AA8H-01A-11R-A41B-07	0	0.0117955972586671	0.179096296580446	0.105976613503107	0	0.354319564531458	0.0330296596520084	0	0.021225303760459	0	0.0122181038048173	0	0.00629893791746861	0.0700875588938282	0.00749280599852989	0.0649578755241897	0.0515594213589337	0.0274744631945219	0	0	0.0544677980215652	0	0.013	0.248674045069109	0.992918605811228
TCGA-AA-A01Q-01A-01R-A002-07	0.00433961637988474	0	0.022455082094424	0.164907745831591	0	0.0369655405090487	0.0384130548835386	0.136557682271912	0.0927973287243643	0	0	0.0978773974575666	0	0.0734000114320267	0.0673258899904131	0.157687276233965	0.0848867765470925	0	0.0223865976441731	0	0	0	0.083	0.115707352938496	1.04796390287029
TCGA-AA-3979-01A-01R-1022-07	0.0128703155631492	0	0.00249320738481234	0.0220088510313087	0	0.177038805996703	0.0945360430199349	0.0371537086942578	0	0	0	0.0195649449235368	0	0.180131053775116	0.0274957029119981	0.158929849720211	0	0.0188832333625466	0	0.153061551173432	0.020136231069141	0.0756965013738518	0.237	0.0533320222615355	1.0712865328225
TCGA-A6-A565-01A-31R-A28H-07	0.244231771226193	0	0.0152470510626742	0.0858602043272301	0.0430718480050527	0.259633584191342	0.0221359055201669	0	0	0	0.0330846104872159	0	0	0.154393864772929	0.0405833701356267	0.0769351079512205	0	0	0	0.0248226823203495	0	0	0.003	0.401035827429369	0.917535538428915
TCGA-A6-5667-01A-21R-1723-07	0.0182782177236159	0	0	0.105490725756263	0	0.164984126324618	0.0551974200742794	0.0509134446213984	0.0253270409967551	0	0.0209348231861394	0	0	0.250329708923824	0.042062042522188	0.136487593893535	0.00430056383587456	0.048520531073625	0.0351298058518308	0	0.0160846450484316	0.0259593101676222	0.105	0.10258592270908	1.04904206392605
TCGA-AA-3842-01A-01R-1022-07	0.00950407537456559	0	0	0.0850307104988386	0	0.165170364486077	0.0373759071836366	0.0314762544015848	0.0204884197384157	0	0.0105111489656841	0	0	0.396492625415001	0.064357911791071	0.145218101368579	0.001015362214128	0	0.0112546169318175	0.0211371818951267	0	0.000967319735474929	0.013	0.250084711109742	1.00192488707296
TCGA-A6-A5ZU-01A-11R-A28H-07	0.0831813508778051	0	0	0.0240691707386462	0	0	0.0627591709458524	0.0088451205511226	0.00815141531189722	0	0.0280360468785278	0	0	0.467327381612902	0.12271459421795	0.15390711028009	0	0	0.0410086385852061	0	0	0	0.0590000000000001	0.145914560979744	1.07146314120858
TCGA-A6-6780-01A-11R-A278-07	0.00205740055925916	0	0.00163880107828366	0.0374945639859399	0	0.040094976072101	0.167410890941979	0.0180898928359905	0	0.0506436931589488	0.0126313402004014	0	0	0.222572147133671	0.126615146310661	0.215798950719728	0.052360697860801	0	0.0201857162112401	0	0.0104735531972646	0.0219322297337312	0.077	0.120725120883628	1.04579811208472
TCGA-AA-3870-01A-01R-1022-07	0.0943238447772083	0	0.00238236714717177	0.144931465886822	0	0.0708371416378074	0	0.022227758674705	0.0710348978005024	0	0.0208381786195801	0.0202273569762101	0	0.154516682872171	0.0462774627204101	0.244704129180668	0.0389947099208614	0	0	0.0288634248723351	0.0221604255763536	0.0176801533371934	0.017	0.228734260940044	0.992065789175313
TCGA-NH-A6GC-01A-12R-A41B-07	0.125688555262032	0	0.079601174246653	0.0816709583951609	0	0.33670221313807	0	0.00229419362292629	0.0440787455235348	0	0.0237904199118339	0.0618866629144164	0.00839527576117076	0.180672678772628	0.00164186231444744	0.0504330992208986	0	0	0	0.00314416091622706	0	0	0.017	0.235759317821118	1.00249350956911
TCGA-AA-3511-01A-21R-1839-07	0.0405287123854466	0	0.00295487599235389	0.0826061561560388	0	0.231212409234755	0.082084529067525	0.0352123450009403	0.0417872506049789	0	0.0109244673790043	0	0.000513332128905742	0.180593421148158	0.0564436510908648	0.168382828431312	0	0.00918314491049523	0.0422545278538769	0	0	0.0153183486153447	0.318	0.0367419903760814	1.07156952459804
TCGA-CM-6167-01A-11R-1653-07	0.144735270989243	0	0	0.0667393343951524	0	0.242011253064902	0.0413202164907536	0	0.0298246612294323	0	0	0.025321926316014	0.0042663555916571	0.018457081665284	0.0863139550829591	0.13687582099893	0.0427520424796119	0	0.161382081696061	0	0	0	0.017	0.232478675106173	0.986605157228648
TCGA-CM-5348-01A-21R-1723-07	0.0172141670136451	0	0	0.0195921537356298	0	0.0626530853195963	0.00373636183276934	0.00225127519078892	0.015707655509698	0	0	0.00379296465798419	0	0.722054762393508	0.0186557244651401	0.0618907505214375	0.0254285696212889	0.00280962430478126	0.0442129054337325	0	0	0	0	0.674907392985671	0.739612539352009
TCGA-AA-3949-01A-01R-1022-07	0.034444572912518	0	0	0.209612625945384	0	0.0734720714101501	0.115932380560615	0.059949580228851	0	0	0.00519738624495247	0.033139011726582	0	0.0598862770822758	0.103379970757309	0.152236098653846	0.0406120471262911	0.00740507012917311	0.00813194242605697	0.00201925542847813	0.0273955840542544	0.0671861253132625	0.036	0.183791521609059	1.01167226103226
TCGA-AA-3952-01A-01R-1022-07	0.0490207146278436	0	0.00279981827019012	0.0496809730009421	0	0.181192201990638	0	0.0264140331764507	0.0328377655194404	0	0.0355476150912794	0	0	0.208060446249473	0.0703442886570041	0.234360657998724	0.0100959934997144	0	0	0.0463520455890869	0	0.0532934463292136	0.113	0.0960238737688096	1.05365505357659
TCGA-AA-3532-01A-01R-0821-07	0.0695489447179801	0	0.00658263152367006	0.0782619942917425	0	0.204581174269524	0.125170286006922	0.0382230737389289	0	0	0	0.00812049430749085	0	0.0886830081609614	0.113642299351777	0.175040290392553	0.0381067397867387	0	0.0540390634517126	0	0	0	0.036	0.184832739609042	1.00651039091407
TCGA-AA-3989-01A-01R-1022-07	0.0327459387445098	0	0.0111801497423046	0.204103021219606	0	0.140180193521976	0.0959919582388638	0	0.00118860209891921	0	0.014466440310265	0	0	0.0968568502589109	0.0759616579710066	0.260733278964228	0.0121404100722766	0	0	0.0332947944751212	0	0.0211567043820125	0.112	0.0964508058944141	1.0475194928004
TCGA-AA-3530-01A-01R-1022-07	0.00582225246771957	0.0794488940483053	0	0.0823967183689146	0	0.366994828505745	0.0407912962485727	0.0325725253899975	0	0	0.0248190340346634	0	0.00453746858940283	0.0357018660296207	0.0532604292549962	0.163647306526068	0.0549007910073448	0	0.051273927498421	0	0.00383266203022872	0	0.074	0.123273813130918	1.03833578105394
TCGA-NH-A5IV-01A-42R-A37K-07	0.0992185426283176	0	0.0402956597320142	0.149738986626574	0	0.0811834793037768	0	0.0284492673493167	0.0110827483496615	0	0	0.0994039329706885	0	0.191219572272322	0.0324590452422579	0.217830389931498	0	0	0.0491183755935726	0	0	0	0.011	0.265179347770486	0.978784924660848
TCGA-CK-4947-01B-11R-1653-07	0.0512791259703792	0	0.0251468038070946	0.158995169378361	0	0.220319831146617	0.0391937852864948	0.0572485355120689	0.0402314988181043	0	0.00377372498614512	0	0.00528775348689145	0.0605102844180183	0.0641952113400331	0.108197995019412	0.0922876471089267	0	0.0480648082344175	0	0.0202257704963889	0.0050420549906481	0.073	0.125642286161686	1.03397705990968
TCGA-AA-3521-01A-01R-0821-07	0.0331482097328793	0	0.00869668968910222	0.0729971748891655	0	0.301827972427547	0	0.0141186010716813	0.000575358995052988	0	0	0.0421796215878733	0	0.158738208948668	0.0381484908352613	0.240476935884638	0.0138818998173008	0.00905384282511521	0	0.0307203743792265	0	0.0354366189164884	0.124	0.0884613652869132	1.05684791643797
TCGA-AA-3554-01A-01R-0826-07	0.0196920446118241	0.0148061244260255	0	0.039761654011798	0	0.145460524137477	0	0.0254075234324478	0.0131312181198563	0	0.00494258718065952	0	0	0.415811873325301	0.0274153296099705	0.096949610986585	0.00446198284636324	0	0	0.126161597090419	0.0255612211591759	0.0404367090620972	0.046	0.167811566221776	1.0488196214272
TCGA-D5-5538-01A-01R-1653-07	0.0604857619873284	0	0.00602906569951652	0.0343018755336891	0	0.096340666665224	0.00893086232563466	0.0205675930205416	0.0489829513457974	0	0.0169954822511646	0	0	0.396417083017416	0.0268284521551194	0.154124509182738	0.00925706813000405	0	0	0.0910300402718626	0.0123954931130679	0.0173130953008954	0.111	0.0968090187443566	1.07723874115916
TCGA-AY-A54L-01A-11R-A28H-07	0.0480837448009119	0	0.0208804571379097	0.0288799625355378	0	0.416055118548035	0.0832952706080148	0.0261554803361329	0	0	0.0149795708324006	0	0.0298568497045204	0.105849715028962	0	0	0.0488753575905605	0.0158108591891217	0	0.105114947096697	0.0561626665911958	0	0.167	0.0719639527265702	1.06329934116409
TCGA-A6-2671-01A-01R-1410-07	0.0198436104698719	0	0	0.0784490862219972	0	0.104987396337769	0	0.0146363682761482	0.0308945951832134	0	0	0.0313288322524891	0.00967274839987193	0.292650960077805	0.0535603416948935	0.259393728553027	0	0.0133259769615536	0	0.0567589628934561	0	0.0344973926779043	0.024	0.208761667502169	1.01671783305732
TCGA-NH-A8F8-01A-72R-A41B-07	0.0769097026614487	0	0.0194204463942871	0.0513515706735562	0	0.14309538235633	0	0.0626273077916772	0.0200428404697982	0	0	0.0170712608139686	0	0.220725555867646	0.102210227511536	0.25061338642568	0	0	0	0.0163649686139682	0.0173509210021805	0.00221642941792336	0.081	0.117551946855042	1.04732916780203
TCGA-AA-3516-01A-02R-0826-07	0.00189599026770694	0	0.00171559534444222	0.273448576641158	0	0.00784113341128795	0.190033645071743	0.0260184319185148	0	0	0.00700796802386859	0.00298342891538118	0.00856747452660277	0.107724669940831	0.117309185770184	0.098092456076281	0.0114928976824862	0.104271777534687	0.0232007325054785	0	0	0.0183960363693471	0.069	0.13629280353731	1.03984121926305
TCGA-G4-6628-01A-11R-1839-07	0.0230155323476487	0	0.00498149707216498	0.256394537028583	0	0.141024406829275	0.12680434938523	0.0617298785273963	0.00713572863562615	0	0.0318995278942933	0.000716550808770277	0	0.0628541223981225	0.0886039853332546	0.119122083315187	0.0266704472392996	0.0171985118363825	0.0318488413487657	0	0	0	0.036	0.185834072538767	1.0186958151204
TCGA-AD-6964-01A-11R-1928-07	0.0228010888632803	0	0.00397577214237994	0.15714453534368	0	0.155488504245816	0.0168423176741353	0.0382486781044838	0.0315499964880656	0.00139993839096695	0	0.0702054415897303	0	0.147980476620529	0.0929408441694759	0.165463783558549	0.0250069022787356	0	0.0709517205301711	0	0	0	0.091	0.109974852741173	1.0461707534574
TCGA-AD-6888-01A-11R-1928-07	0.0046358747201479	0.0782722325680699	0.0100796775862688	0.0366831563294869	0	0.252590883156886	0.0811749376667501	0	0.00217799413026239	0	0	0.064861876206557	0.0140874182116514	0.304373500302605	0.00786004959513198	0	0	0.111920431616881	0.031281967909301	0	0	0	0.199	0.0606365250304686	1.06969093415591
TCGA-AA-3973-01A-01R-1022-07	0.0762919450838569	0	0	0.0615461673445353	0	0.276960897660489	0.0132510106711725	0.0174520513345769	0.0147895106896165	0	0	0.0276989543639469	0	0.33105883510622	0.0473301661116057	0.108733325552417	0.00345885487707931	0	0	0.0214282812044838	0	0	0.075	0.122121323515072	1.05394602630917
TCGA-AA-3680-01A-01R-0905-07	0.0364896720649115	0.0205013830126887	0	0.117777603805565	0	0.337405683798067	0	0.0462359641976325	0.0260113122311547	0.00614821579760391	0	0.0393885376759877	0.00545026011425968	0.0917284917805568	0.0403033858477951	0.15011191367315	0.00101620514345301	0.000741649873572313	0.0564799732859741	0	0.0242097476976283	0	0.12	0.0916870301494924	1.05982285847437
TCGA-AA-3514-01A-02R-0821-07	0.0193477154496413	0	0	0.17809893294477	0	0.0991609809205076	0	0.00517660988753929	0.0749101532623754	0	0	0.0148855350613541	0.0194482854637463	0.400764762546664	0.0304997252397797	0.0870472820891486	0.051133245584716	0	0.0195267715497578	0	0	0	0.002	0.442738207528928	0.89843549903516
TCGA-QG-A5YW-01A-11R-A28H-07	0.153156949882658	0	0.154291252282983	0.0450615585297363	0	0.23903121773137	0.00359427287933758	0.0390473752269661	0.00834478675494581	0	0.011062639895115	0	0	0.141529342404435	0.022810392507083	0.0981342600126546	0	0.00233664589755095	0	0.0815993059951647	0	0	0.005	0.38090027914471	0.928506567427929
TCGA-AY-A69D-01A-11R-A37K-07	0.147917782099293	0	0	0.0301418387056394	0	0.254664195674983	0.0639461736383656	0.0635146924296747	0.0209388736007253	0	0	0.0132617115383932	0	0.114630467358301	0.0371563275681967	0.103581390979396	0.00418235080159077	0.0324772628011271	0	0.112378481751528	0.00120845105278575	0	0.056	0.147819043072259	1.02672158021013
TCGA-5M-AAT5-01A-21R-A41B-07	0.217839097812858	0	0.172057103771263	0.0366606504386433	0	0.202230784643684	0.060861100357427	0.0701096699639933	0	0	0	0.0290633620464772	0.00279241058829751	0.0703644593292573	0.0246794898634899	0.0670251007506961	0	0.0110348044608873	0.035281965973025	0	0	0	0.032	0.196553393123761	1.02892018077915
TCGA-AA-3673-01A-01R-0905-07	0.0952942356303967	0	0	0.0663937064697288	0	0.202680195838847	0.10145046551603	0	0.0117267571290845	0	0	0.0235778473100843	0.029331518419313	0.166219735620177	0.0858500150684421	0.0572218353679763	0.0438282490801281	0	0.116360085223126	0	6.53533266655956e-05	0	0.052	0.158513356608818	1.01352442620495
TCGA-AA-3855-01A-01R-1022-07	0.0348320683137115	0	0.0391932985894026	0.0667485095208814	0	0.248999899859352	0.126045925599539	0	0.00751131546030872	0	0	0.0507446406674791	0.019294093759947	0.205133852834011	0.0261623981669066	0.0988605390947477	0.00655543111287633	0	0.0699180270208363	0	0	0	0.078	0.120205446380419	1.03422986453959
TCGA-CM-6172-01A-11R-1653-07	0.0775381714916397	0	0.00963212997420225	0.048315804467129	0	0.328935740281432	0	0	0	0	0	0	0	0.311600663404179	0.00950471932716733	0.143984848841559	0.00308038039151551	0	0.00646498518443367	0.0609425566367427	0	0	0.088	0.112312313913073	1.05819171301649
TCGA-AZ-6600-01A-11R-1774-07	0.195288029937381	0	0.0359069643669647	0.0637781512201924	0	0.16277385685362	0.000707898060498355	0.00403573711156226	0.0138075894552514	0	0.0135536695212801	0	0	0.262385138567065	0.052345680129468	0.145177975844937	0	0	0.00403745538028158	0.0409661334240292	0	0.00523572012746903	0.01	0.269693618507198	0.980170998008573
TCGA-F4-6463-01A-11R-1723-07	0.123446045058514	0	0.00140233126217751	0.0436425174138677	0	0.194289192734148	0.117350699064866	0	0	0.0446471040160445	0	0.0371177312109386	0.00722549548402981	0.114693986343769	0.0922043455654978	0.13659024077181	0	0	0.0873903110743368	0	0	0	0.036	0.184915622282134	1.00535995893417
TCGA-AA-3971-01A-01R-1022-07	0.201080158844999	0	0.119936961726101	0.115899337983712	0	0.0948521448789073	0.0925710129066783	0	0.017195258525063	0	0.000443253165047894	0.00793615057815261	0	0.110434656205149	0.0421491332596976	0.116052257380156	0.0120293409290014	0	0.0694203336173352	0	0	0	0.001	0.509616906427317	0.862212806256852
TCGA-AA-3666-01A-02R-0905-07	0.0474628922840161	0	0.0549838276050851	0.0388429826512909	0	0.193950198049996	0.074667246943693	0.0538431032490296	0.00825897957171219	0	0.0385931063434571	0	0.00747993110777359	0.144112978397464	0.0919260821153484	0.157819977688864	0.00772395453322806	0.00294511417257226	0	0.0467347962751778	0	0.0306548290112914	0.028	0.198721574993865	1.00139139067975
TCGA-D5-6898-01A-11R-1928-07	0.0484905758802727	0	0.000467336891226274	0.0760185286697953	0	0.153113867641566	0.055109204253284	0	0.0520943933393384	0	0.0420047499494992	0	0	0.398183558458392	0.0319487039467897	0.0840628543900166	0.00943123096310924	0.00703508213746772	0	0.024832430471272	0	0.0172074830079711	0.01	0.267071724225235	0.988933829516593
TCGA-D5-6537-01A-11R-1723-07	0	0.00783862429448374	0	0.0703692354086533	0	0.139626282159304	0.222932252729383	0	0.0350817750005586	0	0.0218268574333087	0	0.00997170200453248	0.280196190799831	0.00805597871328544	0	0	0.0209881786099454	0	0.0853314349374992	0	0.0977814879092146	0.081	0.118470389818417	1.04723160252699
TCGA-SS-A7HO-01A-21R-A37K-07	0.070102331796261	0	0.00157560724861413	0.146032467926587	0	0.124147134152737	0.0223408042357915	0.0305236288535783	0.00822640897634981	0	0.0840018190741402	0	0.108885655436607	0.134700887257933	0.0272885980825707	0.130245213998911	0	0	0	0.101375352512871	0.00685891725014586	0.00369517319690206	0.711	-0.00897190461376619	1.0863043025779
TCGA-CK-5915-01A-11R-1653-07	0	0	0.00324880377871505	0.0201682410350644	0	0.381287903656834	0.130459461288027	0	0.0046452301037879	0	0.0190792530390282	0.00199035069909378	0.00928649514119153	0.0804905159575736	0.0239162246876834	0.168289691007327	0.0425763582923842	0.0635796680187729	0.0381376064565307	0	0.0128441968379869	0	0.275	0.0455692833523842	1.06570708917079
TCGA-AA-A00L-01A-01R-A002-07	0.000183637373816305	0	0.0390579091104439	0.065233109201435	0	0.216026588202392	0.0570819663471588	0.0143609957430781	0.0327333834485549	0	0	0.0891332964261614	0	0.230821430687645	0.0305235993932274	0.0610416035141118	0	0.0169401108378804	0	0.146862369714095	0	0	0.182	0.0680668648416116	1.07633847537866
TCGA-G4-6321-01A-11R-1723-07	0.135939783133225	0	0.0101727870850027	0.314064661693312	0	0.190187129478138	0.0335716329872862	0.0361841827908592	0.00686416180639101	0	0	0.0316967303815309	0	0.0604967238165144	0.0179876444992978	0.0555933727288914	0.00974833691843657	0.0298261847178246	0.0676666679632906	0	0	0	0.0600000000000001	0.143920698748369	1.04758675111593
TCGA-AA-3489-01A-21R-1839-07	0.176715673898248	0	0.0617659785761708	0.0913381675621811	0	0.177877600566584	0.0252970853195153	0.0129265164298541	0.0176473937780313	0	0.0175474422375929	0	0.00784513854800005	0.185513336240703	0.0797377559915487	0.087375118729307	0.000320891598597704	0	0	0.0413545267335752	0	0.016737373790091	0.00700000000000001	0.30514183697797	0.960927140790641
TCGA-AA-A01S-01A-21R-A083-07	0.00285287249476548	0.00170891431333586	0.00811633245940009	0.10288218801442	0	0.0904172321615392	0.189126502532699	0	0.00921938280558263	0	0.0645632072912842	0	0.0381747103511905	0.252994284583528	0.067611162125995	0.0858319657083883	0.0410118419697622	0	0	0.0228264940759293	0.0226629091121804	0	0.665	-0.00448663013445416	1.08809950434698
TCGA-DM-A1HB-01A-21R-A180-07	0.0441204648158124	0	0.00328386214792439	0.00763338961587415	0	0.193962588960291	0	0.0023795194885237	0.0633493823531364	0	0.0698090866469074	0	0	0.235084181661427	0.0137029768455969	0.0424135119463585	0	0.00354574389875009	0	0.316053099371474	0	0.00466219224792409	0.073	0.127061441109098	1.07151237162312
TCGA-D5-6931-01A-11R-1928-07	0	0.0191860487148247	0.035386708409025	0.0927876262406346	0	0.184269276946689	0.0515672113325993	0.089096960967822	0.0300423751540159	0	0.0172131727417803	0	0	0.127437144917081	0.0980424626945967	0.126845524211762	0.0220387797583493	0	0.0895095239507667	0.0146307152416505	0	0.00194646871840368	0.09	0.110364404873472	1.03833760625473
TCGA-T9-A92H-01A-11R-A37K-07	0.0216859842512061	0.00830649744089736	0.0201568365921058	0.141482020354899	0	0.136963166785542	0.0699172141966557	0.0951861258116951	0.00994039968781573	0	0	0.0413920096288065	0	0.207971109547664	0.0627512326781148	0.105941574875275	0.0223376493400762	0	0.0478883203479348	0	0.00807985846131248	0	0.28	0.0446580271456601	1.07004955447986
TCGA-A6-5656-01B-02R-A277-07	0.0176589824230294	0	0.00240004978970741	0	0	0.258195383661201	0.0856966871596913	0.0151844607687714	0	0	0.0248668063791784	0	0	0.232473615117406	0.00711269477133626	0.216939320467862	0	0.0394246272710073	0.0421708670651974	0	0.057121150522004	0.00075535460360851	0.186	0.0666299313694344	1.06106843829334
TCGA-AD-6965-01A-11R-1928-07	0.0731092595726031	0	0.002482524109348	0.163063668900502	0	0.0931903430402026	0.0953627883303442	0.0211146677462045	0.0121145161122535	0	0.0101150788901011	0.00397485042928463	0	0.287295625853148	0.0297190878061235	0.138870786068859	0.00569828954822085	0	0.0638885135928042	0	0	0	0.0610000000000001	0.143813777897134	1.03100632311236
TCGA-DM-A1D7-01A-11R-A155-07	0	0.0335615978756491	0.0111558230575252	0.123704000900427	0	0.325935805069086	0.0238868087946766	0.0520344163007368	0	0	0	0	0.024007321286763	0.148885493121672	0.0665766556274091	0.0936417174610606	0.0314752891890838	0	0	0.0527971613484079	0.012337909967502	0	0.183	0.0676549809984775	1.06770277883093
TCGA-A6-6140-01A-11R-1774-07	0.0299440089339868	0	0.00706736472617977	0.151298804903201	0	0.227312809280384	0.100152314616703	0.0404341799723009	0.00268709483470565	0	0.0446386509692018	0.00528834985498541	0.0020483517802539	0.0939495836006057	0.0260394401398351	0.0658905620191222	0	0.0307055822264809	0	0.15425712981003	0	0.0182857723320245	0.148	0.0783665070190117	1.06545445788235
TCGA-AA-3662-01A-01R-1723-07	0.0342359436837256	0	0.000477218382379938	0.0852962976243366	0	0.0703540785409785	0.0430719104469195	0.0152573154326421	0	0	0.0226238436560865	0.0237962289094911	0	0.277612855046853	0.116252783181536	0.142326683822834	0.00534952675910007	0	0	0.108141840850566	0.0249336845772921	0.0302697890852585	0.263	0.0497319829556148	1.08658115332031
TCGA-A6-2678-01A-01R-0821-07	0.0548940802956833	0	0.00774902376201482	0.111741854081613	0	0.256221343493324	0.0860354024949941	0.0242049235184211	0	0	0.0090638143380513	0.0192288944109771	0.00208661163892895	0.175892185117823	0.0682016034328255	0.137426620213425	0.0103478965337228	0.00622018139370764	0.0306855652744891	0	0	0	0.055	0.149856277945082	1.02706509070579
TCGA-CM-6675-01A-11R-1839-07	0	0	0.017993868645914	0.0816830327003268	0	0.260256414083826	0.0905605239863389	0.0972166575136322	0.0432475938416839	0.00821220405557246	0.00568220968597312	0	0	0.0362250412021878	0.0856184740442606	0.168257646767673	0.0538122112279523	0.00363754970262903	0.0475965725420302	0	0	0	0.324	0.0356735099571638	1.07654295440534
TCGA-AY-4071-01A-01R-1113-07	0.0537299740300237	0	0.0346392913952684	0.230623339694423	0	0.209623915923718	0.017220560580338	0.0381999500169933	0.034720818372701	0	0	0.0118447014959108	0.0227120847224145	0.0897075381361628	0.0884541179794397	0.126921772353392	0.0275017038639974	0	0	0.0141002314352172	0	0	0.054	0.150372547349847	1.03468635303721
TCGA-CA-5797-01A-01R-1653-07	0.0587927700839599	0	0.0410796845498398	0.112311528543338	0	0.0618334463469158	0.0449118547128506	0.0332091039537306	0.0409551733581475	0	0	0.0157100641739553	0	0.30161559628031	0.135138888120362	0.0750109351547716	0.0110415503597841	0	0.0683894043620347	0	0	0	0.017	0.229596665752162	0.998105183226057
TCGA-AA-3681-01A-01R-0905-07	0.0953023935923941	0	0	0.17495267570381	0	0.24085072573362	0	0.00768687715744026	0.0112499892894659	0	0	0.0463730828599155	0	0.103578876941646	0.047933551054559	0.19028342908268	0.0105223127610334	0	0	0.0325032613471039	0.0387628244763325	0	0.0600000000000001	0.144271595184891	1.03271615980342
TCGA-AA-A00Q-01A-01R-A002-07	0.0634447328662592	0	0.0230852172037371	0.110389122321007	0	0.25686122414412	0.0519858997714559	0.0373556487404677	0.0623556218867852	0	0.00139050830615985	0.00573675690797071	0	0.1280584432813	0.0878537651422478	0.0912564404556147	0.0360514766038199	0	0.0441751423690552	0	0	0	0.07	0.134516204862792	1.03474893734699
TCGA-A6-2684-01C-08R-A277-07	0.0111459229375305	0	0.00304431936219305	0	0	0.241626369899543	0	0.0228248985337891	0	0	0.0197482457776479	0	0	0.0449293492439007	0.158659636265975	0.31978573880522	0	0.0306364988615357	0	0.0871778363770263	0.0435048840889835	0.0169162998466546	0.0600000000000001	0.144881518460061	1.039283127493
TCGA-AM-5820-01A-01R-1653-07	0.0128928450615907	0	0	0.134856585043995	0	0.171007591208575	0	0	0.0502699927860954	0	0	0	0.0220199627048812	0.193990701215227	0.0489879614250577	0.217867739479065	0.0445933528083057	0	0	0.0964173942173448	0.00709587404986252	0	0.238	0.0532969224700304	1.0727744739903
TCGA-CK-6746-01A-11R-1839-07	0.0190020701721511	0	0.00149428497661352	0.183187055723963	0	0.0219727632669436	0.15783386788153	0.00744157604816419	0.0351585568405495	0.0149634199446979	0.0570519840768795	0	0	0.0521086234898802	0.194369403293052	0.190310277124039	0.00704857026470372	0	0.058057546896833	0	0	0	0.00700000000000001	0.296899939886125	0.969620757417858
TCGA-AA-A00W-01A-01R-A002-07	0.0252870941424514	0.021560701865154	0	0.154107967477479	0	0.0664593484804616	0.237188450370662	0.114878488156946	0	0	0.0511877761754768	0	0	0.160112930231994	0.04568714435485	0.0689361009260383	0	0.0453415983492413	0	0	0	0.00925239946924513	0.268	0.0479779251057168	1.07078908604972
TCGA-AZ-4323-01A-21R-1839-07	0.243083918586804	0	0.0685482687483163	0.186608830606168	0	0.173376291256652	0.0253839245460733	0.10282680393802	0.0323110684542591	0	0	0	0	0.101901548960563	0.0232463068149308	0.0369775903224288	0	0.00564198189223967	0	9.34658735445213e-05	0	0	0.005	0.376216090754459	0.936305784186105
TCGA-CM-4746-01A-01R-1410-07	0.0115790789781235	0.00726693586418264	0	0.208290840433677	0	0.228537217948867	0	0.0202045823628676	0.0973125823427699	0	0	0.0367553061386881	0	0.263682649044364	0.0349244079092689	0.0384597939634688	0	0.007098567838248	0	0.0458880371754744	0	0	0.144	0.0796602595658678	1.08399621825856
TCGA-A6-6137-01A-11R-1774-07	0	0.0180060273381827	0.0195833877401824	0.0513013938995136	0	0.247025211427817	0.0831310829651197	0.00573198405016057	0.120983426372858	0	0	0.0259110541372563	0.00230994443775944	0.177324970103656	0.0333892525634616	0.0873154832634639	0.0161848674019576	0.0588011496121266	0.0308266415129411	0	0.0221741231735425	0	0.154	0.0771924226140887	1.05731587607249
TCGA-AA-3860-01A-02R-0905-07	0.0606933102575623	0	0.00925716985935346	0.0798684760582678	0	0.230602428710893	0.032353406152705	0.0641694003437779	0.0223285629375603	0	0.0309571232222536	0	0	0.199662831517885	0.0577355702589591	0.0771402372072517	0	0.00384304890233669	0	0.126926041299257	0.00264995605268824	0.00181243721924907	0.072	0.129504245429528	1.04008367913928
TCGA-A6-2674-01A-02R-A278-07	0.0169831114433198	0	0.00732108358902959	0.0212239939469586	0	0.126469337997486	0.00424727239226403	0.00107879245174489	0	0	0	0.00382959865167638	0	0.321290128679711	0.00997721813829122	0.122786362713454	0	0	0	0.199239352774618	0.0259368236985291	0.139616923522917	0.0629999999999999	0.141963759710302	1.0672056042346
TCGA-AA-3986-01A-02R-1022-07	0.103000069462364	0	0.148476682915332	0.119964050210868	0	0.166004938281013	0.0580241565130696	0.0354834797102524	0.0496508388392874	0	0	0.0104546653606161	0	0.12631650362953	0.0815816771654062	0.0776931668154661	0.00315513833442334	0	0	0.0107797351726012	0	0.00941489758977052	0.004	0.390096718527805	0.922793277593412
TCGA-CM-6165-01A-11R-1653-07	0.0689673921356525	0	0.00559896656546874	0.0420388293295585	0	0.15042269633007	0.0830971747353562	0.0158591389656548	0.00121407494639162	0	0.0212118925191106	0	0	0.361079197716633	0.0701579363987212	0.120377494364256	0.0129388796111724	0	0.0420314726515442	0	0	0.0050048537304095	0.055	0.149213313052781	1.03725856565626
TCGA-A6-5656-01A-21R-A278-07	0.00288688174180147	0.00537892322462283	0	0	0	0.113023416647877	0.0435988414774845	0.00180469017178612	0.00382501562252528	0	0.112871727246141	0	0	0.622017133779894	0.00994137153176697	0	0	0	0	0.0846519985561008	0	0	0.185	0.0667456484426524	1.14346236012704
TCGA-AA-3520-01A-01R-0821-07	0.00763285929021375	0	0.00864233635198783	0.06552134129574	0	0.22478003556565	0.00488187052438712	0.0294242185177787	0.0278774037838401	0	0	0	0	0.13091885675906	0.0835312397046593	0.259313486927402	0.0638217939509313	0	0.0209220710945635	0.0335047312306772	0.0207297882946714	0.0184979667084377	0.187	0.066182541948757	1.06100282341217
TCGA-G4-6625-01A-21R-1774-07	0.0955741028698614	0	0	0.0990945838346313	0	0.105517178217499	0.111081112757132	0.0393214122617719	0.0119682046666113	0	0	0.0332822043169322	0	0.240626431315785	0.065230179910251	0.0798867094554216	0.0124694587499866	0.0110087140076075	0.0949397076365093	0	0	0	0.045	0.169468419484608	1.01359204558328
TCGA-DM-A28M-01A-12R-A16W-07	0.0343361707568315	0	0	0.0559818239064221	0	0.392480773658733	0	0.00439834514147048	0.0457313657562839	0	0.0964678234039731	0	0.0115745010960703	0	0.00757987503954764	0.040733029425494	0	0.0291987736494944	0	0.270313881158183	0.0112036370074972	0	0.275	0.0457462684823087	1.10977708168778
TCGA-D5-6920-01A-11R-1928-07	0.0832652482748217	0	0.011326129124743	0.0104032421646359	0	0.290056420409559	0.147737100488594	0.0038693263595083	0.00757864531521156	0	0.0369066808644799	0	0	0.311672670589843	0.00745278808274151	0.0251669607106183	0	0.0456312483481645	0	0.0189335392670793	0	0	0.072	0.130068109339893	1.04091939653583
TCGA-DM-A288-01A-11R-A16W-07	0.019217203879401	0	0	0.0251604072745461	0	0.0579494541802482	0	0.0102478644732696	0.0473280757061891	0	0.0929779949263663	0	0	0.457703649766702	0	0.0494010793610737	0	0	0	0.240014270432204	0	0	0.257	0.0508138462075746	1.13476552530473
TCGA-AA-A02O-01A-21R-A16W-07	0.0173918908867069	0.0282010720701388	0	0.109586165923943	0	0.185190056814001	0.26899002588245	0	0	0	0.00382146369229309	0	0.020962892164561	0.23187058499401	0.0510762980585265	0.0251167872691715	0.0487175980654491	0	0	0.00907516417874984	0	0	0.106	0.101337406624248	1.04603946292781
TCGA-AA-A02E-01A-01R-A00A-07	0.0279059123227688	0	0.00852461195244027	0.0775682991234754	0	0.271185035482098	0.00434865110816782	0.0741228316324827	0.0744317907078396	0	0	0.0521183687443134	0.00391073096906687	0.166149629328134	0.0574340632023445	0.120797452405416	0.0240115255451246	0	0	0.0374910974763274	0	0	0.402	0.024223926995051	1.09099602415501
TCGA-AA-3710-01A-01R-1022-07	0.0226528577248795	0	0.00156117178052694	0.255355947231802	0	0.100415631392728	0.138754641690488	0.0405477602737497	0.0105157230132419	0	0.0192980221580876	0	0	0.0872922016463489	0.0838785841969986	0.140056924094107	0.00385396689864682	0.000456516278961779	0	0.00109760349213585	0	0.0942624481272966	0.033	0.192443895972931	1.01314914030394
TCGA-AZ-4614-01A-01R-1410-07	0	0.0474284286681939	0	0.319945293495015	0	0.0811164724696226	0	0.0704775592826268	0	0	0.0240185238434888	0.0221175921194753	0.0386133244708082	0.100507707052658	0.115398541891638	0	0	0.0332919552352325	0	0.12581949877047	0.0212651027007708	0	0.083	0.115597002090428	1.06264564661911
TCGA-G4-6320-01A-11R-1723-07	0.220635515231373	0	0	0.0840208811945278	0	0.399815719457636	0	0	0.0120702419455505	0	0	0.0348182448802564	0.0147346724537698	0.109756282558992	0.072321918597424	0.0166018778538531	0.0185931708077918	0	0.016631475018826	0	0	0	0.089	0.111347459206238	1.06269570097667
TCGA-A6-6781-01B-06R-A277-07	0.0475415634776093	0	0.00382193937392833	0	0	0.165272833756629	0	0.00208951983101083	0	0	0.00922730761982189	0	0	0.129981964300788	0	0.0835451435473343	0	0.0404355768124982	0	0.206555675997771	0.0502703789341806	0.261258096348428	0.031	0.197289872964107	1.03289825358746
TCGA-AA-3856-01A-01R-0905-07	0.081862338952815	0	0.0144882886453253	0.126121286420877	0	0.170983755507459	0.00789709595257254	0.0218282562503273	0.0512023692707548	0	0	0.0301602005223697	0	0.184623349518708	0.100478531867686	0.118026663582882	0.0399246697200039	0	0.0390337059146169	0	0.0133694878736021	0	0.05	0.163889230407479	1.02065551695446
TCGA-A6-6138-01A-11R-1774-07	0.0811588676693356	0	0.00735652888499681	0.0475833428977236	0	0.224986072801784	0.0066656679049846	0.0346146656820211	0.0114422769734592	0	0.00984581500052976	0.0153832154919426	0	0.295705546563984	0.0862998890018024	0.143051463589473	0.0130013131591554	0.0113444931409397	0.0115608412378687	0	0	0	0.044	0.170800347836358	1.02682571097905
TCGA-A6-2685-01A-01R-1410-07	0.0894693352904476	0	0.00107564558178929	0.0605556531744893	0	0.112308625376203	0.0314348658876584	0.0407069388704853	0.0337348194053734	0	0	0	0	0.175704167319878	0.0136423346366256	0.233356184515102	0.0978741753044622	0	0	0.0561885700972212	0.0270677378386171	0.0268809467016467	0.032	0.196373989334938	1.00524075366456
TCGA-QG-A5YX-01A-11R-A28H-07	0	0.0377849131951468	0.00327069806588869	0.106481859415088	0	0.23133643344203	0	0	0.0125467718485776	0	0.00759106073800084	0	0	0.208092521394359	0	0.116468459698353	0.0397912076371961	0.0640734794317486	0	0.152619166173162	0.0199434289604485	0	0.299	0.040107760347168	1.07886994340104
TCGA-DM-A1D8-01A-11R-A155-07	0.00311423428109459	0	0	0.249003631048226	0	0.110281409152353	0.0888597047661619	0.0297826642436911	0.00836516175385986	0	0	0.0996120756834506	0	0.214763163848862	0.0545226082921678	0.0727571871424603	0.00372635604154713	0	0.0652118037461252	0	0	0	0.21	0.0588305048508735	1.08224929334628
TCGA-AM-5821-01A-01R-1653-07	0.0466944382773796	0	0.0361968283184811	0.23403174904308	0	0.11597003602113	0.119329703423165	8.52697251121304e-05	0	0	0.0792654806468889	0	0.00151953307051185	0.0700658445758587	0.176735830011687	0.0985697903318953	0.00280159164942092	0	0	0	0.00213670403847624	0.0165972008669125	0.072	0.131702450605301	1.0521044051393
TCGA-A6-6650-01A-11R-A278-07	0.0175949901435988	0	0.0262459748499418	0.0327683780459578	0	0.350275734929283	0.0681424695514557	0.0404617020261209	0	0	0.0249891325006509	0	0.0296749454034256	0.232194659911808	0.0573009963947738	0.0506955055279658	0.0136616227596705	0	0	0.0372504238589116	0.0187434640964361	0	0.82	-0.0175691713640084	1.10036028032216
TCGA-CK-5916-01A-11R-1653-07	0.0494156855507818	0	0.00578803765104737	0.131805967916696	0	0.111964954133551	0.0850219012418384	0.0516581783333445	0.00715805847355257	0.023787454406672	0.010544678725702	0.0304453333970518	0	0.15120904896907	0.105668040860998	0.11709359253017	0.0395315630502738	0	0.0642751927287652	0	0	0.0146323120304862	0.053	0.157058941146821	1.01987947273113
TCGA-NH-A50T-01A-11R-A28H-07	0.0275994247516005	0	0	0.0551277625816602	0	0.0892039084176024	0.143359214454755	0.0209252569245778	0	0	0.00395123818400533	0	0	0.265885766436136	0.00468280981814306	0.0920499735806601	0	0.0731425696763445	0	0.111599416245825	0.0725185488785202	0.0399541100501695	0.452	0.0179263149791145	1.08490285504882
TCGA-WS-AB45-01A-11R-A41B-07	0.0740326097779322	0	0.0134463234187754	0.010142611818227	0	0.136557340296909	0.0250277925716545	0	0	0	0.0404545413741028	0	0.00387180485318489	0.27590848672393	0.0313607653230694	0.172625675563713	0	0	0	0.0493544592729077	0	0.167217589005595	0.002	0.458313911172083	0.888401605410618
TCGA-AA-A00Z-01A-01R-A002-07	0.0464169450182369	0	0	0.100992491785588	0	0.200763786222023	0.117413462958882	0.0198952925255687	0.0311513011518234	0	0.00451278595242824	0	0	0.212046218103665	0.103019211417914	0.118832811207791	0.00260070130752772	0	0.0423549923485517	0	0	0	0.183	0.0678036256324035	1.0620746542493
TCGA-CM-6674-01A-11R-1839-07	0.0719207350281676	0	0.00574109969989985	0.10336974865208	0	0.240530607694443	0.0240328760688885	0.011681707392463	0.00252471256552567	0	0	0.0556571986010913	0	0.212195893803191	0.111840034706548	0.0996050933177498	0.0122639986601376	0	0.0486362938098155	0	0	0	0.01	0.269647406935552	0.978224724886807
TCGA-AA-3833-01A-01R-0905-07	0.0933162658287045	0	0.00334026179416808	0.184964776358077	0	0.105368142182316	0.0825201192022733	0.0225290167176995	0	0	0	0.00748604611207271	0	0.192685494636842	0.0311362381605894	0.139230758851743	0	0.00701661441100951	0	0.0778627043937666	0.0133399742773926	0.0392035870733458	0.037	0.182391745584252	1.01166262201158
TCGA-A6-A566-01A-11R-A28H-07	0	0.000618061743728817	0.000714492796310941	0.0218748974410266	0	0.0793682367604164	0.000687282725636641	0.0403780903493511	0.0353948589044293	0	0.00930568660855961	0	0	0.549225822981453	0.0153837046315327	0.189924982122471	0	0	0	0.0550824551919117	0	0.00204142774317177	0	0.702110966672461	0.717304034004733
TCGA-CA-6715-01A-21R-1839-07	0.0440541495229999	0	0.0062284350568101	0.0747943341547852	0	0.109120692023506	0	0.0487152506898774	0.0538853565563375	0	0.0253898002171715	0	0	0.421851982575633	0.035978745422342	0.0336646919126079	0	0	0	0.142323634381505	0	0.00399292748642474	0.132	0.0852758971208502	1.08597850538384
TCGA-NH-A6GA-01A-11R-A37K-07	0.034715592492295	0	0.00231965794515883	0.127886630563869	0	0.271725389401935	0.0987535973165481	0	0.0189625634293393	0	0.00260222660228889	0.00223313446273414	0	0.140972532246553	0.0469176091899487	0.0848093845516054	0.0971982568760052	0.021522005192429	0.0493814197292901	0	0	0	0.57	0.0047827178757845	1.08131282095937
TCGA-AA-A004-01A-01R-A00A-07	0.170282751360239	0	0.0296192864187344	0.0903031076599314	0	0.268344420744127	0	0.00782384876903863	0.0793568055432827	0	0	0.0888640814167763	0	0.203892455344696	0.0325214322780099	0.0267504866871072	0	0	0	0.00224132377805706	0	0	0.00700000000000001	0.291480185260923	0.975411487396439
TCGA-AD-6889-01A-11R-1928-07	0.0257828411472373	0	0.0131984842510361	0.00788765221155705	0	0.258893629654547	0.00230618710443721	0.0487050731442607	0.0232807793714777	0	0.0354811410789097	0	0	0.202101296823107	0.0261046845675646	0.0938775348185783	0	0.0449422935168225	0	0.187243063059138	0.00629532014524603	0.0239000191060813	0.086	0.113091743480902	1.05017534186121
TCGA-D5-6536-01A-11R-1723-07	0.00215014005499829	0	0.000234574691925414	0	0	0.113113988635042	0	0	0.0166994644505851	0	0.10873555229284	0	0.000699588552984354	0.419947127338156	0	0.0516497478931491	0	0	0	0.266562575263737	0	0.0202072408265834	0.021	0.218319553539435	1.04470554560796
TCGA-G4-6322-01A-11R-1723-07	0.0458116459694187	0	0.0106019421836236	0.0511060135802158	0	0.321463912803524	0.0331327697079477	0.0402461710134316	0.0436409957614299	0	0.0355829229783326	0.00463336612611526	0	0.184121136213329	0.0366631227359935	0.0743585894649035	0	0.0121229567429944	0	0.10651445471874	0	0	0.109	0.0975246456758474	1.05640447144014
TCGA-AA-A029-01A-01R-A00A-07	0.0108278300495024	0	0.00891852968001259	0.104062975485646	0	0.18032662410689	0	0.0474168468637416	0.045741841881899	0.0113940049162066	0	0.10089360613996	0	0.27211461546186	0.0381442910164358	0.10054243225711	0.0160100172848098	0	0	0.0636063848559272	0	0	0.275	0.045726004292027	1.09020477650829
TCGA-AZ-5407-01A-01R-1723-07	0.0280059205468889	0	0.0277919959505751	0.181969772626382	0	0.465818217392854	0	0	0.0232049997254067	0	0	0.00891556890214916	0.0150114497716672	0.0704310966848375	0.0377755105984208	0.0809685029820641	0.0188838424817095	0	0.0328209883543517	0.00840213398269402	0	0	0.114	0.095172035747301	1.07987085988992
TCGA-AA-A00N-01A-02R-A00A-07	0.0343697689953783	0	0.00262022907676427	0.0247793666325652	0	0.115334981540549	0	0.0194980241079287	0.0284562195096204	0	0	0.0184210465289964	0	0.504139252287881	0.0460939051495998	0.127935671436681	0	0	0	0.0597426106992794	0	0.0186089240347561	0.00700000000000001	0.298227159060386	0.992578068200966
TCGA-D5-6540-01A-11R-1723-07	0.0400891045366543	0	0.0013003721014523	0.143572371337044	0	0.0976966676964022	0.0158939319005414	0.0471191895867496	0.0109178185195971	0	0.0264316762129051	0.0242597843585224	0	0.277538900922178	0.0807553578567942	0.0710354359309953	0	0	0	0.113515410816245	0	0.0498739782239196	0.00700000000000001	0.29068449723713	0.972513424112263
TCGA-AA-3548-01A-01R-1873-07	0.0327169866259465	0.00170024365661365	0	0.135441843626327	0	0.320805079711641	0.00733785568846591	0	0.0704492770407434	0	0	0.0361495942180306	0	0.0878631335697758	0.0772701798207687	0.165426422325789	0.0313397317289345	0	0.0334996519869641	0	0	0	0.159	0.0740577560435797	1.06975355721267
TCGA-A6-6649-01A-11R-1774-07	0.0980790707647737	0	0.0586805186800355	0.107868417744045	0	0.290045810132155	0	0	0.0205892420120053	0	0	0.0183088715964089	0.0284189784441717	0.172420376108259	0.0559032715205797	0.0690875073233337	0.00402235453108856	0	0.0765755811431444	0	0	0	0.016	0.236081964823801	0.98957142285677
TCGA-DM-A282-01A-12R-A16W-07	0.00466497107756373	0.00311626673852674	0.00678825364973628	0.147585280103876	0	0.209700247469603	0.0879277455256494	0	0.00788919445041064	0	0.0740206977188747	0	0.0401479831427239	0.282170436857192	0.0162598606626535	0.0398006068879783	0.0318554282157632	0	0	0.0480730274994489	0	0	0.384	0.0260287583175459	1.08963145805651
TCGA-AA-3655-01A-02R-1723-07	0.0585756734243743	0	0.00797915237729081	0.0369789121345397	0	0.320185388208708	0	0.00642934393279863	0.0707208321456759	0	0.0310235689958365	0	0	0.189222348265015	0.0844878201799461	0.14451392146559	0.00718864632585422	0.0124917354374329	0.0143569297633882	0.0158457273435492	0	0	0.107	0.100124432957251	1.05327752752442
TCGA-G4-6311-01A-11R-1723-07	0.205032346502704	0	0	0.019369219422666	0	0.0826728546681643	0.00337088233255017	0.027882096751763	0.0315110370624399	0	0	0	0	0.498737782243796	0.0285165978050221	0.0714642179116868	0	0	0	0.0266958164736657	0	0.00474714882554204	0.00600000000000001	0.334188760041031	0.967797791742515
TCGA-G4-6297-01A-11R-1723-07	0.109584555690425	0	0	0.105756879888478	0	0.179729527935417	0	0.0109390255814444	0	0	0.0156343702930857	0.00483285303361095	0	0.193151937631181	0.088442423195968	0.227874986842905	0.0172954551409314	0.0116632350436433	0.00756373178113156	0	0	0.0275310179417788	0.017	0.234388061141183	0.993257995755154
TCGA-5M-AAT6-01A-11R-A41B-07	0.0522985155328586	0	0.0415672354743978	0.139419035412477	0	0.111097127835049	0.0951295645284729	0.0497086634939732	0.0239916428573359	0	0.00314448456517162	0.00497821161392541	0	0.145524134313595	0.120871075725696	0.151836608281798	0.0218199167063142	0	0.0386137836589357	0	0	0	0.035	0.188369483583743	1.00787881832147
TCGA-D5-6534-01A-21R-1928-07	0.0286813284925465	0	0.00413819024212305	0.0587401178793409	0	0.110907642959256	0.0124015348268185	0.0531161797875596	0.0727145925542142	0	0	0.0159556094034309	0	0.294205684087239	0.0975154533350958	0.0952779859233532	0.0897966820393351	0	0.0578213577347077	0	0	0.00872764073498029	0.107	0.0999101364511882	1.05385341423749
TCGA-DM-A1DB-01A-11R-A155-07	0.0089228022761513	0.00321992353349135	0	0.408555578663662	0	0.0204364929658818	0.109965470992536	0.0293106186976624	0	0	0	0.0709077018405931	0.0292216239410781	0.133083937098367	0.0928197355516554	0.0328086300711644	0.0303488095214293	0	0.0303986748463279	0	0	0	0.101	0.104551303425324	1.0705853222761
TCGA-CM-6678-01A-11R-1839-07	0.0370944920986734	0	0.00665519106606579	0.0398786751379684	0	0.197290529146416	0	0.0215675936658268	0.0176750780060965	0	0.0829833288321773	0	0	0.342254313104256	0	0.0386767334083337	0	0.0109158698449804	0	0.181073468962423	0.0239347267267824	0	0.072	0.129687206415161	1.05780078145889
TCGA-AA-3660-01A-01R-1723-07	0.0809137855252916	0	0	0.0392703630808192	0	0.167080889589101	0.0984448948707656	0	0.0122417627004326	0	0.0390936046153968	0.0175595592184064	0.0229673746862596	0.0539471030489044	0.0244835897368558	0.211522166745034	0.0543362591251148	0.00728263179974857	0.104789947423401	0	0.0538050685554662	0.0122609992790029	0.076	0.121693547589276	1.02063559546069
TCGA-DM-A0XF-01A-11R-A155-07	0.0151596893245969	0	0.0051555304992959	0.0551718123567285	0	0.16104615697382	0.132060805578725	0.0430495823187014	0	0	0	0.0606872789482434	0.0163945592495489	0.207534375267883	0.124453176692456	0.0734033437343673	0.0171857580149238	0	0.0726979271583317	0	0.0160000038823786	0	0.069	0.135336494504364	1.0329623998686
