# Supplementary material for: A Novel Prognostic Chemokine-Related lncRNAs Signature Associated with Immune Landscape in Colon Adenocarcinoma
Source: Dis Markers. 2022 Nov 3;2022:2823042. doi: 10.1155/2022/2823042 (PMC9649319; doi:10.1155/2022/2823042)
Supplement: Supplementary Materials — Supplementary Figure S1: (A) Heatmap of the expression of prognostic chemokine-related lncRNAs between tumor tissues and normal tissues. (B) Boxplot of the expression of prognostic chemokine-related prognostic lncRNAs in COAD tissues and normal tissues. (C) Barplot showed the proportion of 22 kinds of TIICs in each COAD sample. (D) Correlation between 22 kinds of TIICs was visualized. ∗p < 0.05; ∗∗p < 0.01; ∗∗∗p < 0.001. Supplementary Figure S2: Survival analysis was conducted in high-risk and low-risk patients with different clinical parameters. Supplementary Figure S3: Risk stratification showed the differences in drug susceptibility between high-risk and low-risk groups. Supplementary Table S1: Clinical information of the COAD patients. Supplementary Table S2: The 64 chemokine genes. Supplementary Table S3: Expression of 52 chemokine-related lncRNAs in COAD. Supplementary Table S4: Immune cell content of COAD samples was calculated using the CIBERSORT algorithm. Supplementary Table S5: Immune, Stromal, and ESTIMATE scores for COAD samples. Supplementary Table S6: Expression of 10 chemokine-related lncRNAs and risk score in the entire cohort. Supplementary Table S7: The immune cell infiltration status in all tumor samples in RNA-seq. Supplementary Table S8: Tumor mutation burden data of the low-risk group. Supplementary Table S9: Tumor mutation burden data of the high-risk group. Supplementary Table S10. The immunotherapy score data was obtained from the TCIA database. Supplementary Table S11: Quantitative real-time PCR primer sequences of model lncRNAs. Supplementary Table S12: The correlation values of immune cell infiltration and patient risk score. Supplementary Table S13: The correlation values of chemokine-related lncRNAs and immune cells. [file 2823042.f1.zip › Supplementary Table 5 (1).txt]

ID	StromalScore	ImmuneScore	ESTIMATEScore
TCGA-D5-6532-01A-11R-1723-07	-1199.75381720483	-187.611738365865	-1387.3655555707
TCGA-DM-A0XD-01A-12R-A155-07	-802.825007066356	-105.791318831138	-908.616325897494
TCGA-AA-3492-01A-01R-1410-07	-466.169841026074	761.510766778702	295.340925752627
TCGA-AA-A022-01A-21R-A16W-07	-389.292071934837	1317.13998394095	927.847912006118
TCGA-AD-6899-01A-11R-1928-07	450.097299640898	1190.29479540864	1640.39209504954
TCGA-AA-3844-01A-01R-1022-07	-958.774191229817	533.243993602173	-425.530197627644
TCGA-AD-6901-01A-11R-1928-07	484.493376294912	967.467466691818	1451.96084298673
TCGA-AA-A01P-01A-21R-A083-07	266.592420774394	1820.79253608167	2087.38495685606
TCGA-G4-6293-01A-11R-1723-07	-740.057845686756	1007.10434457195	267.046498885191
TCGA-AA-3715-01A-01R-0905-07	513.520907149785	1763.92537721644	2277.44628436623
TCGA-AY-A71X-01A-12R-A37K-07	-2151.28505382642	-672.845579343838	-2824.13063317025
TCGA-DM-A28C-01A-11R-A32Y-07	-1528.90668971724	-584.473442673886	-2113.38013239112
TCGA-AA-3560-01A-01R-0821-07	-448.591862778375	723.519255209534	274.927392431159
TCGA-AA-3552-01A-01R-0821-07	-588.992999795258	1157.82784683027	568.834847035013
TCGA-CM-6166-01A-11R-1653-07	-807.725705049906	-627.899736167633	-1435.62544121754
TCGA-AZ-5403-01A-01R-1653-07	-4.35981379997118	306.64450185196	302.284688051989
TCGA-G4-6299-01A-11R-1774-07	-68.023535640362	1031.54163862706	963.518102986694
TCGA-AA-3496-01A-21R-1839-07	248.919825310167	1189.52957605782	1438.44940136798
TCGA-A6-5661-01A-01R-1653-07	-864.583987267437	333.479305577566	-531.104681689871
TCGA-G4-6304-01A-11R-1928-07	-1637.00082280473	187.432571005745	-1449.56825179898
TCGA-CM-5864-01A-01R-1653-07	-1024.56131137969	234.95595428473	-789.605357094959
TCGA-AY-A8YK-01A-11R-A41B-07	-1169.44368639983	-86.5266833593044	-1255.97036975914
TCGA-DM-A28K-01A-21R-A32Y-07	-1343.93326141948	-222.483405300383	-1566.41666671986
TCGA-CK-5913-01A-11R-1653-07	-366.010265628058	775.677204463854	409.666938835796
TCGA-AZ-6605-01A-11R-1839-07	815.048333949563	1254.21358340005	2069.26191734961
TCGA-CM-4751-01A-02R-1839-07	-323.545581589239	935.792453988883	612.246872399644
TCGA-CM-6677-01A-11R-1839-07	-125.358689804457	510.515611581488	385.156921777031
TCGA-G4-6627-01A-11R-1774-07	208.096810729019	1148.74798992	1356.84480064901
TCGA-A6-2677-01B-02R-A277-07	49.1964296809442	-126.21514036845	-77.0187106875056
TCGA-AA-3526-01A-02R-A32Z-07	-433.7008234059	873.672688981628	439.971865575728
TCGA-CA-5255-01A-11R-1839-07	-1662.54121813332	-331.800245465259	-1994.34146359858
TCGA-AA-3977-01A-01R-1022-07	-398.163803318319	861.608913775274	463.445110456956
TCGA-AA-A01F-01A-01R-A002-07	-1780.4115770502	-197.318601512232	-1977.73017856243
TCGA-D5-5540-01A-01R-1653-07	-900.812807553349	68.7594960904732	-832.053311462876
TCGA-5M-AAT4-01A-11R-A41B-07	-1346.76261819552	-516.64735650399	-1863.40997469951
TCGA-AA-3864-01A-01R-1022-07	-423.109598782644	332.236198732849	-90.873400049795
TCGA-CA-6717-01A-11R-1839-07	672.699261824752	1405.97735734804	2078.67661917279
TCGA-CM-6161-01A-11R-1653-07	-410.166845173168	695.410535700669	285.243690527501
TCGA-AA-3819-01A-01R-0905-07	-935.620506342538	155.104873955283	-780.515632387256
TCGA-AA-3861-01A-01R-1022-07	-1443.73241904982	807.320827368207	-636.411591681616
TCGA-D5-6926-01A-11R-1928-07	412.87628334195	674.751643054846	1087.6279263968
TCGA-AA-3531-01A-01R-0821-07	-1134.43243432237	-37.8765293652884	-1172.30896368766
TCGA-AA-3685-01A-02R-A32Z-07	-248.259237765279	1253.05376207217	1004.79452430689
TCGA-AA-3712-01A-21R-1723-07	-211.018296875062	247.992987171265	36.9746902962023
TCGA-AA-3837-01A-01R-0905-07	-477.817972362395	274.131700545004	-203.68627181739
TCGA-AZ-4616-01A-21R-1839-07	-685.218999888483	547.78601048222	-137.432989406264
TCGA-D5-6928-01A-11R-1928-07	1068.23052432793	3010.25683676665	4078.48736109458
TCGA-AA-A02J-01A-01R-A00A-07	-1799.08516498294	-702.88624015095	-2501.97140513389
TCGA-D5-6538-01A-11R-1723-07	-1478.42854566586	-893.5522683025	-2371.98081396836
TCGA-NH-A6GB-01A-11R-A37K-07	-953.846515659679	517.697054520948	-436.149461138731
TCGA-A6-2682-01A-01R-1410-07	-32.3409565817682	781.658909778936	749.317953197168
TCGA-AA-A02Y-01A-43R-A32Y-07	-1984.80125061564	345.815061225897	-1638.98618938974
TCGA-AA-3850-01A-01R-1022-07	-307.726662220859	1155.04581673489	847.319154514036
TCGA-CK-6747-01A-11R-1839-07	-647.311420986681	319.642071721111	-327.669349265571
TCGA-A6-6782-01A-11R-1839-07	409.688402237616	1012.09808858708	1421.78649082469
TCGA-CM-5860-01A-01R-1653-07	482.252204263081	665.355665446009	1147.60786970909
TCGA-AA-A00R-01A-01R-A002-07	-250.593949261486	2017.27261835206	1766.67866909057
TCGA-A6-6653-01A-11R-1774-07	-558.082295468961	512.394539891109	-45.6877555778518
TCGA-AD-6890-01A-11R-1928-07	-655.944340818603	205.657517342407	-450.286823476197
TCGA-D5-6539-01A-11R-1723-07	-866.581040368129	466.626773050755	-399.954267317374
TCGA-AD-A5EK-01A-11R-A28H-07	-966.981154326575	-360.554336817451	-1327.53549114403
TCGA-A6-3808-01A-01R-1022-07	544.330247628399	1267.75201597116	1812.08226359956
TCGA-AA-3506-01A-01R-1410-07	-429.124956820182	903.731904279346	474.606947459164
TCGA-G4-6298-01A-11R-1723-07	-748.900603748539	-695.129705227192	-1444.03030897573
TCGA-AZ-6608-01A-11R-1839-07	-2021.89808931709	-456.580800920899	-2478.47889023799
TCGA-AA-3678-01A-01R-0905-07	-873.211750852243	774.156207827387	-99.0555430248563
TCGA-A6-5665-01A-01R-1653-07	-1300.0248275761	336.26541109866	-963.759416477435
TCGA-G4-6306-01A-11R-1774-07	-1900.96587643614	60.0454198886297	-1840.92045654751
TCGA-F4-6806-01A-11R-1839-07	-553.852085500713	336.484089424314	-217.367996076399
TCGA-AA-A01T-01A-21R-A16W-07	-1289.8525422674	44.5431211464337	-1245.30942112096
TCGA-A6-6651-01A-21R-1839-07	1226.39098415827	1636.60697499761	2862.99795915588
TCGA-AA-3812-01A-01R-0905-07	108.38265021777	910.667716880656	1019.05036709843
TCGA-F4-6809-01A-11R-1839-07	163.257855239909	910.911369316953	1074.16922455686
TCGA-AD-5900-01A-11R-1653-07	-133.144848988585	998.405360593558	865.260511604973
TCGA-D5-6930-01A-11R-1928-07	78.2172442415151	1083.71170669107	1161.92895093259
TCGA-AA-A03J-01A-21R-A16W-07	-544.845300472395	862.920176287659	318.074875815264
TCGA-AA-3815-01A-01R-1022-07	-492.747262105939	1609.75461807636	1117.00735597042
TCGA-CM-6169-01A-11R-1653-07	967.82631318327	1622.13851538276	2589.96482856603
TCGA-A6-6650-01B-02R-A277-07	-855.886584927812	-122.058317748683	-977.944902676495
TCGA-F4-6855-01A-11R-1928-07	766.010549712375	423.981063948438	1189.99161366081
TCGA-CM-4748-01A-01R-1410-07	-321.407053995407	480.39640380918	158.989349813773
TCGA-AA-3517-01A-01R-0821-07	-604.562394146802	492.711559653125	-111.850834493677
TCGA-D5-5541-01A-01R-1653-07	-61.0033053472432	754.169598316644	693.1662929694
TCGA-A6-2686-01A-01R-A32Z-07	217.62753012721	1882.05627362542	2099.68380375263
TCGA-NH-A50U-01A-33R-A37K-07	-786.364747371445	-144.916508024579	-931.281255396025
TCGA-AA-3543-01A-01R-0826-07	-315.052781670216	1516.25808512864	1201.20530345843
TCGA-AA-3518-01A-02R-0826-07	-789.963299825558	1010.34286797962	220.379568154064
TCGA-AA-3984-01A-02R-1022-07	-364.741851229052	658.368144624736	293.626293395684
TCGA-CM-4752-01A-01R-1410-07	-203.137264835932	1027.79801977475	824.660754938815
TCGA-AA-3663-01A-01R-1723-07	-885.719964818733	470.283101203259	-415.436863615474
TCGA-AA-3549-01A-02R-0821-07	-689.219250800759	542.131965492943	-147.087285307816
TCGA-AA-3561-01A-01R-0821-07	-913.826308470596	269.922179750694	-643.904128719902
TCGA-G4-6626-01A-11R-1774-07	-1496.80919367238	-346.536839031485	-1843.34603270386
TCGA-AA-3821-01A-01R-1022-07	-275.796492034743	569.115705180153	293.319213145411
TCGA-CK-4952-01A-01R-1723-07	-990.654018647287	148.75608498972	-841.897933657567
TCGA-A6-2681-01A-01R-1410-07	178.209321151485	770.679443859608	948.888765011093
TCGA-AY-6197-01A-11R-1723-07	-1214.47178594043	329.848618793599	-884.623167146835
TCGA-AY-6386-01A-21R-1723-07	-1049.65854195461	472.349799746843	-577.308742207764
TCGA-AU-3779-01A-01R-1723-07	-144.709285813669	1064.01215770968	919.302871896011
TCGA-CM-4744-01A-01R-A32Z-07	-1231.67710208479	710.800983819249	-520.876118265537
TCGA-AD-A5EJ-01A-11R-A28H-07	-867.29362897419	31.7458753256792	-835.54775364851
TCGA-AA-A00F-01A-01R-A002-07	-447.458222573975	97.4266398962682	-350.031582677707
TCGA-AA-3866-01A-01R-1022-07	380.54709924442	1640.8171503912	2021.36424963562
TCGA-AA-A01K-01A-01R-A00A-07	-167.709668181259	543.63953833666	375.929870155401
TCGA-CM-5863-01A-21R-1839-07	120.445078514339	496.125693836338	616.570772350677
TCGA-A6-3809-01A-01R-A278-07	-46.2609260465403	1365.29608997391	1319.03516392737
TCGA-NH-A8F7-06A-31R-A41B-07	-1914.21046755725	-963.284681873454	-2877.49514943071
TCGA-D5-6932-01A-11R-1928-07	-229.534195433915	450.590098982465	221.05590354855
TCGA-AA-3675-01A-02R-0905-07	-840.242695451292	199.760257245001	-640.482438206291
TCGA-A6-2680-01A-01R-1410-07	-541.716925730507	538.523432652962	-3.19349307754578
TCGA-CM-5862-01A-01R-1653-07	-539.133269239676	-446.490359703555	-985.623628943231
TCGA-AA-3555-01A-01R-0821-07	-289.89385744964	390.925817668007	101.031960218367
TCGA-DM-A28G-01A-11R-A16W-07	-1304.97670326309	-202.342977378546	-1507.31968064164
TCGA-5M-AATE-01A-11R-A41B-07	-1141.83312514381	-175.734379746295	-1317.56750489011
TCGA-DM-A28H-01A-11R-A16W-07	-1334.41902466689	-563.179746476377	-1897.59877114327
TCGA-AA-A024-01A-02R-A00A-07	-1388.37142818422	-44.9440637216301	-1433.31549190585
TCGA-CM-4747-01A-01R-1410-07	-526.774996259193	244.279174198036	-282.495822061157
TCGA-G4-6314-01A-11R-1723-07	305.046423957429	228.835982594712	533.882406552141
TCGA-AA-3930-01A-01R-1022-07	-371.976967780948	968.197710725299	596.220742944351
TCGA-CA-6718-01A-11R-1839-07	-206.743726886362	1527.4792049986	1320.73547811224
TCGA-AD-6963-01A-11R-1928-07	-1002.62385969783	741.514158635244	-261.109701062582
TCGA-AA-3982-01A-02R-1022-07	-183.414498325917	1165.32533502854	981.910836702621
TCGA-5M-AATA-01A-31R-A41B-07	-643.476341667195	284.618778897886	-358.857562769309
TCGA-CM-6680-01A-11R-1839-07	17.7043596560326	866.228058638374	883.932418294407
TCGA-DM-A1D6-01A-21R-A155-07	-1688.05460758568	-880.790044030202	-2568.84465161588
TCGA-AZ-6603-01A-11R-1839-07	-29.7116969383838	673.873099749841	644.161402811457
TCGA-A6-6142-01A-11R-1774-07	539.945132102526	556.132987001003	1096.07811910353
TCGA-AZ-4315-01A-01R-1410-07	-510.103301207632	677.09461917975	166.991317972119
TCGA-AD-6895-01A-11R-1928-07	-362.397926311306	823.134691618844	460.736765307538
TCGA-CA-5796-01A-01R-1653-07	-1223.39150872278	443.34913623688	-780.042372485904
TCGA-A6-2672-01B-03R-2302-07	-100.707819552808	1243.85830198152	1143.15048242871
TCGA-AA-3510-01A-01R-1410-07	-556.649493489631	1012.57113803713	455.921644547496
TCGA-AA-3527-01A-01R-0821-07	-45.0769307390455	927.077968735416	882.001037996371
TCGA-F4-6807-01A-11R-1839-07	861.142039263771	1356.00465191081	2217.14669117458
TCGA-G4-6310-01A-11R-1723-07	-578.244835580235	-673.767298232361	-1252.0121338126
TCGA-AA-A00K-01A-02R-A002-07	-854.011450582048	317.050342214838	-536.96110836721
TCGA-D5-6529-01A-11R-1774-07	453.1685829783	1469.71264825775	1922.88123123605
TCGA-AA-A01I-01A-02R-A089-07	-1267.36548851394	172.340740190855	-1095.02474832309
TCGA-AA-A01Z-01A-11R-A083-07	-1366.78600422142	-464.57849758458	-1831.364501806
TCGA-G4-6588-01A-11R-1774-07	-699.514697817693	459.402722949521	-240.111974868172
TCGA-CK-5912-01A-11R-1653-07	-704.546581938231	-78.7889172014771	-783.335499139708
TCGA-CM-6679-01A-11R-1839-07	241.630032933216	654.905265339702	896.535298272918
TCGA-AA-3519-01A-02R-0821-07	-796.101311111447	454.716217220035	-341.385093891413
TCGA-AZ-6607-01A-11R-1839-07	950.81291167616	1065.89016787417	2016.70307955033
TCGA-A6-5659-01B-04R-A277-07	-513.042097646379	-384.969273335378	-898.011370981756
TCGA-CM-5344-01A-21R-1723-07	-109.594192969669	-58.5604446209293	-168.154637590598
TCGA-AA-3831-01A-01R-0905-07	-604.697160594774	721.983717303998	117.286556709224
TCGA-A6-2672-01A-01R-0826-07	76.7630699953295	1850.17681074987	1926.9398807452
TCGA-DM-A0X9-01A-11R-A155-07	-1111.88935782678	188.201980232401	-923.687377594376
TCGA-D5-6541-01A-11R-1723-07	482.555023168394	1218.18143899425	1700.73646216264
TCGA-A6-3810-01A-01R-1022-07	509.598326858292	1181.96733858111	1691.5656654394
TCGA-A6-4107-01A-02R-1410-07	-127.377546829159	796.079828062732	668.702281233573
TCGA-AA-3875-01A-01R-0905-07	-462.321805654777	988.985901060488	526.664095405711
TCGA-G4-6295-01A-11R-1723-07	-817.705523212475	939.273242803912	121.567719591438
TCGA-DM-A28F-01A-11R-A32Y-07	-1328.03384562282	-185.727222459221	-1513.76106808204
TCGA-CM-4743-01A-01R-1723-07	-861.042970595306	704.529376338134	-156.513594257172
TCGA-F4-6808-01A-11R-1839-07	-1336.41895716539	-272.839411297566	-1609.25836846296
TCGA-AA-A00U-01A-01R-A002-07	-1053.80389119137	-16.5926570725318	-1070.3965482639
TCGA-AA-A017-01A-01R-A00A-07	-558.06817776947	231.647310366138	-326.420867403331
TCGA-AA-A01X-01A-21R-A083-07	-989.25592611464	-6.38568963788226	-995.641615752523
TCGA-CM-5861-01A-01R-1653-07	-1212.70439745714	11.2386046135672	-1201.46579284357
TCGA-A6-5659-01A-01R-A278-07	-415.321519301646	-174.343375065238	-589.664894366884
TCGA-D5-5537-01A-21R-1928-07	-463.990767947154	-89.750383733607	-553.741151680761
TCGA-CK-4948-01B-11R-1653-07	-118.244559117826	451.772118452035	333.527559334208
TCGA-A6-3809-01A-01R-1022-07	-160.934960292531	1524.61352113217	1363.67856083964
TCGA-AA-3968-01A-01R-1022-07	-120.370440176507	636.407099172565	516.036658996058
TCGA-D5-6530-01A-11R-1723-07	-590.965759353884	1150.01664768579	559.050888331902
TCGA-AA-3818-01A-01R-0905-07	-922.489171642741	201.656618055822	-720.832553586919
TCGA-G4-6315-01A-11R-1723-07	-1657.77886366845	-481.840966435305	-2139.61983010375
TCGA-AA-3562-01A-02R-0821-07	-423.275403107863	558.188517262184	134.913114154321
TCGA-AA-3872-01A-01R-1022-07	626.778579674301	928.460601129195	1555.2391808035
TCGA-AA-3845-01A-01R-1022-07	-502.911885398559	995.820491540613	492.908606142054
TCGA-AA-A010-01A-01R-A089-07	-959.090689685109	334.809106788358	-624.281582896751
TCGA-AA-3529-01A-02R-0821-07	-954.988308244835	87.7169109956873	-867.271397249148
TCGA-A6-2675-01A-02R-1723-07	487.664938434541	1001.58752405737	1489.25246249191
TCGA-A6-5659-01A-01R-1653-07	-544.747997539007	-95.606230030842	-640.354227569849
TCGA-AA-A01R-01A-21R-A083-07	-661.835631882055	1539.90798130202	878.072349419964
TCGA-A6-5664-01A-21R-1839-07	481.960022551942	1111.53076957672	1593.49079212866
TCGA-AA-A02H-01A-01R-A089-07	-877.559352333906	-56.341656372289	-933.901008706195
TCGA-AA-3862-01A-01R-1022-07	-611.003904777336	1057.32349779763	446.319593020292
TCGA-D5-7000-01A-11R-A32Z-07	-295.646415995883	548.204743751707	252.558327755824
TCGA-CA-6716-01A-11R-1839-07	-581.671483444657	-442.525968140644	-1024.1974515853
TCGA-AA-A01G-01A-01R-A002-07	-1369.35108356638	-268.43906292069	-1637.79014648707
TCGA-A6-5661-01B-05R-2302-07	409.060898193412	1341.9264621751	1750.98736036851
TCGA-D5-6535-01A-11R-1723-07	-553.568188900589	698.115363512253	144.547174611665
TCGA-CK-6748-01A-11R-1839-07	423.303546709419	579.675474315886	1002.9790210253
TCGA-D5-5539-01A-01R-1653-07	15.6075141231132	696.226844596864	711.834358719977
TCGA-A6-4105-01A-02R-1774-07	24.1829261623877	1130.58354129906	1154.76646746145
TCGA-G4-6307-01A-11R-1723-07	-1591.07745955054	-449.639681202278	-2040.71714075282
TCGA-AA-3970-01A-01R-1022-07	-888.510628300921	824.38394503081	-64.1266832701104
TCGA-CK-5914-01A-11R-1653-07	-589.007564731791	190.112920136273	-398.894644595518
TCGA-A6-5666-01A-01R-1653-07	-1381.66417342698	-273.026323624058	-1654.69049705104
TCGA-4N-A93T-01A-11R-A37K-07	-1769.00573168473	-345.728670674332	-2114.73440235907
TCGA-CM-6171-01A-11R-1653-07	-846.229737003378	399.35160567913	-446.878131324247
TCGA-G4-6309-01A-21R-1839-07	-1212.14680917171	69.2290997118015	-1142.91770945991
TCGA-AA-3697-01A-01R-1723-07	-836.429833361668	454.00519296734	-382.424640394328
TCGA-G4-6586-01A-11R-1774-07	-1485.41229031068	736.690517158677	-748.721773152004
TCGA-A6-3809-01B-04R-A277-07	443.02987206223	1568.375790415	2011.40566247723
TCGA-A6-6650-01A-11R-1774-07	-1250.49749661691	-274.564290816296	-1525.06178743321
TCGA-AA-3544-01A-01R-1873-07	165.008500847398	1589.41547343484	1754.42397428224
TCGA-A6-A567-01A-31R-A28H-07	-809.9407776906	-322.55403984977	-1132.49481754037
TCGA-CM-6676-01A-11R-1839-07	-469.026449135391	-295.710547763005	-764.736996898396
TCGA-AA-3672-01A-01R-0905-07	-332.072075645773	1539.43496623794	1207.36289059216
TCGA-AA-3553-01A-01R-0821-07	-267.726894915047	960.528769518622	692.801874603574
TCGA-A6-A56B-01A-31R-A28H-07	-431.836450556993	-267.022407446816	-698.858858003809
TCGA-D5-6927-01A-21R-1928-07	76.9524918454847	1236.28012441295	1313.23261625844
TCGA-AA-A00E-01A-01R-A002-07	-514.738050391178	1115.86935064447	601.131300253297
TCGA-AA-3814-01A-01R-0905-07	192.544655784726	1185.47610477322	1378.02076055795
TCGA-A6-2674-01A-02R-0821-07	1142.85213634074	2014.44798583043	3157.30012217117
TCGA-A6-2676-01A-01R-0826-07	-152.861414413679	1572.11902835975	1419.25761394607
TCGA-AA-A02K-01A-03R-A32Y-07	-1376.78798288063	-210.039278951327	-1586.82726183196
TCGA-F4-6570-01A-11R-1774-07	448.93283975705	1673.89232431018	2122.82516406723
TCGA-DM-A1D9-01A-11R-A155-07	-1214.44078688358	-411.153364926605	-1625.59415181019
TCGA-CK-4951-01A-01R-1410-07	244.860573896284	1341.75800112773	1586.61857502402
TCGA-AA-3956-01A-02R-1022-07	-411.106662619354	546.990716051318	135.884053431964
TCGA-A6-2683-01A-01R-0821-07	-1104.82239900455	27.1437799812429	-1077.6786190233
TCGA-AA-3713-01A-21R-1723-07	-704.209615454024	1007.66168238951	303.452066935484
TCGA-AA-3955-01A-02R-1022-07	-1041.0956105007	102.766044141824	-938.329566358881
TCGA-AZ-6598-01A-11R-1774-07	-756.131847536785	867.895079544934	111.76323200815
TCGA-A6-6780-01B-04R-A277-07	590.118934008155	1803.96855089438	2394.08748490254
TCGA-F4-6704-01A-11R-1839-07	983.036462879797	812.883776673574	1795.92023955337
TCGA-CM-6163-01A-11R-1653-07	-47.4049822075651	872.361227763236	824.956245555671
TCGA-AA-3869-01A-01R-1022-07	-294.427774427076	1082.01181557492	787.584041147847
TCGA-AA-3538-01A-01R-0821-07	-346.814845081349	252.209976676016	-94.604868405333
TCGA-DM-A1DA-01A-11R-A155-07	-1414.43775704137	-276.644603800802	-1691.08236084217
TCGA-AA-3494-01A-01R-1410-07	-964.908389734917	264.356906972579	-700.551482762338
TCGA-A6-2677-01A-01R-0821-07	-1401.39963137691	-387.575395276266	-1788.97502665317
TCGA-CM-6168-01A-11R-1653-07	827.734814522241	1173.08036266501	2000.81517718725
TCGA-AA-3852-01A-01R-0905-07	-94.4564087744632	849.317078269302	754.860669494838
TCGA-AA-3851-01A-01R-1022-07	-550.487539789264	887.062593401331	336.575053612066
TCGA-A6-6654-01A-21R-1839-07	1130.00253745132	1932.59732329351	3062.59986074483
TCGA-DM-A28E-01A-11R-A32Y-07	-1759.5178990383	-450.56886561737	-2210.08676465567
TCGA-A6-5665-01B-03R-2302-07	-77.0776629779773	618.183553379301	541.105890401324
TCGA-AA-3509-01A-01R-1410-07	-614.270299941605	588.420303187382	-25.8499967542225
TCGA-F4-6459-01A-11R-1774-07	376.090450715093	293.51620546898	669.606656184073
TCGA-A6-6781-01A-22R-A278-07	1218.51385155461	1421.59714663694	2640.11099819154
TCGA-DM-A1D0-01A-11R-A155-07	-1818.33540198198	-828.143641133516	-2646.47904311549
TCGA-NH-A8F7-01A-11R-A41B-07	-1537.31536651119	-693.92223624411	-2231.2376027553
TCGA-AA-A02W-01A-01R-A00A-07	-1097.00362942164	-246.252621922906	-1343.25625134455
TCGA-AA-3524-01A-02R-0821-07	-712.474627841978	351.567661798442	-360.906966043536
TCGA-AA-3841-01A-01R-0905-07	-384.901245658856	931.155693299604	546.254447640748
TCGA-CK-4950-01A-01R-1723-07	-602.549467006458	992.265547167489	389.716080161031
TCGA-G4-6294-01A-11R-1774-07	-992.060774045529	116.445964070707	-875.614809974822
TCGA-A6-3807-01A-01R-1022-07	-212.687804843678	872.789777436085	660.101972592408
TCGA-AA-3846-01A-01R-1022-07	-709.529608436259	742.638735058495	33.1091266222354
TCGA-F4-6703-01A-11R-1839-07	1696.52703356405	2417.00094405035	4113.52797761441
TCGA-AZ-4313-01A-01R-1410-07	-1064.26510868904	-41.9349998768217	-1106.20010856586
TCGA-F4-6461-01A-11R-1774-07	-34.9994065678313	624.018602161412	589.019195593581
TCGA-A6-3810-01A-01R-A278-07	442.976500175524	740.327270073602	1183.30377024913
TCGA-A6-5656-01A-21R-1839-07	-1284.16037143536	-278.65218780857	-1562.81255924393
TCGA-AA-3664-01A-01R-0905-07	-1234.53559025988	223.211619291737	-1011.32397096815
TCGA-G4-6317-02A-11R-2066-07	-1226.52051625329	-555.374690526044	-1781.89520677934
TCGA-D5-6929-01A-31R-1928-07	43.833311481645	630.503610646617	674.336922128262
TCGA-A6-6780-01A-11R-1839-07	-513.1708886669	1852.26100455686	1339.09011588996
TCGA-A6-6648-01A-11R-1774-07	-1288.22001081	-134.488886936164	-1422.70889774616
TCGA-F4-6569-01A-11R-1774-07	1193.51581233111	1111.26387304212	2304.77968537323
TCGA-AA-3966-01A-01R-1113-07	372.031989617219	1896.84448834763	2268.87647796484
TCGA-A6-2684-01A-01R-1410-07	354.893195220982	1242.50993654384	1597.40313176482
TCGA-3L-AA1B-01A-11R-A37K-07	-606.573896498108	230.051880000512	-376.522016497595
TCGA-AA-A00A-01A-01R-A002-07	-416.059840811015	748.199673895513	332.139833084498
TCGA-A6-6781-01A-22R-1928-07	1244.70627881261	1742.18434106999	2986.8906198826
TCGA-AA-3950-01A-02R-1022-07	494.507981565388	1828.11555534262	2322.62353690801
TCGA-DM-A285-01A-11R-A16W-07	-533.419915668154	-589.128086873547	-1122.5480025417
TCGA-A6-2674-01B-04R-A277-07	1108.45416559247	1480.70815109975	2589.16231669222
TCGA-CM-5349-01A-21R-1723-07	-69.8314431412102	737.52202288622	667.69057974501
TCGA-AA-A00J-01A-02R-A002-07	-439.318626028526	342.872127862172	-96.4464981663538
TCGA-AY-6196-01A-11R-1723-07	1788.09627438355	2668.98152527391	4457.07779965746
TCGA-AA-3534-01A-01R-0821-07	-665.538047555719	58.7639586331604	-606.774088922559
TCGA-G4-6302-01A-11R-1723-07	1009.44993775882	933.590497493823	1943.04043525264
TCGA-A6-6141-01A-11R-1774-07	-618.092299037916	844.089323337198	225.997024299282
TCGA-DM-A280-01A-12R-A16W-07	-880.122003549667	51.1679569456689	-828.954046603999
TCGA-AA-3939-01A-01R-1022-07	-584.805788968864	756.84214483185	172.036355862986
TCGA-A6-2679-01A-02R-1410-07	-478.872734687902	1183.75103033065	704.878295642752
TCGA-AA-3502-01A-01R-1410-07	-1383.96360645444	596.173291185091	-787.790315269352
TCGA-D5-6533-01A-11R-1723-07	-632.020115241067	256.631557035945	-375.388558205121
TCGA-AA-3693-01A-01R-0905-07	-1014.86426929785	73.3013385376891	-941.562930760159
TCGA-AD-6548-01A-11R-1839-07	-92.3108403177546	1026.64836352047	934.337523202715
TCGA-CM-6170-01A-11R-1653-07	-178.110191277212	524.947230595653	346.837039318441
TCGA-AA-3684-01A-02R-0905-07	511.910757208245	1280.93952726818	1792.85028447643
TCGA-AA-3941-01A-01R-1022-07	-1180.64984583808	-5.63224505807001	-1186.28209089615
TCGA-A6-5660-01A-01R-1653-07	-328.742474595808	216.97577551744	-111.766699078368
TCGA-A6-6652-01A-11R-1774-07	-1382.60374445932	-442.591070820305	-1825.19481527963
TCGA-CM-5868-01A-01R-1653-07	-415.304342237234	32.7848905151979	-382.519451722036
TCGA-CM-6164-01A-11R-1653-07	-635.206416099319	351.931044000844	-283.275372098475
TCGA-AZ-6606-01A-11R-1839-07	-1503.89649939987	-147.387594938694	-1651.28409433856
TCGA-DM-A1HA-01A-11R-A155-07	-1983.38400445715	-323.217269392778	-2306.60127384993
TCGA-G4-6323-01A-11R-1723-07	-1668.67337336387	918.901010847711	-749.772362516158
TCGA-AA-3542-01A-02R-1873-07	-901.637401516425	224.054505632748	-677.582895883677
TCGA-D5-6924-01A-11R-1928-07	460.767488380546	1038.64824961314	1499.41573799369
TCGA-F4-6856-01A-11R-1928-07	-904.14075973341	222.265873989188	-681.874885744222
TCGA-QG-A5YV-01A-11R-A28H-07	-1337.0238098571	-70.8743187150597	-1407.89812857216
TCGA-AA-3688-01A-01R-0905-07	-820.459167287665	365.53087891332	-454.928288374345
TCGA-AA-3980-01A-02R-1022-07	-532.552676375884	1206.31885185796	673.766175482075
TCGA-AA-3525-01A-02R-0826-07	-1004.40990626354	617.018068432277	-387.391837831265
TCGA-AA-3994-01A-01R-1113-07	-519.191573406177	446.495873052904	-72.6957003532732
TCGA-AY-4070-01A-01R-1113-07	-697.252036926765	401.534396843729	-295.717640083036
TCGA-AA-3495-01A-01R-1410-07	-804.577871870884	659.476282637764	-145.10158923312
TCGA-D5-6531-01A-11R-1723-07	-143.467102588999	767.799515019584	624.332412430584
TCGA-CA-5254-01A-21R-1839-07	-425.800142617256	-28.6916030101704	-454.491745627427
TCGA-QL-A97D-01A-12R-A41B-07	-1200.44996788232	675.251105659358	-525.198862222962
TCGA-AA-A02R-01A-01R-A00A-07	-153.012681561656	1629.7264687934	1476.71378723174
TCGA-CK-6751-01A-11R-1839-07	-166.238330495614	310.004147960241	143.765817464627
TCGA-F4-6805-01A-11R-1839-07	603.17879591431	1037.70059450856	1640.87939042287
TCGA-AA-3696-01A-01R-0905-07	-829.003624760826	-258.406300481405	-1087.40992524223
TCGA-A6-5662-01A-01R-1653-07	-678.734432524067	-229.068017601157	-907.802450125224
TCGA-AZ-6601-01A-11R-1774-07	78.2656127051218	1412.6816703248	1490.94728302992
TCGA-A6-2684-01A-01R-A278-07	336.270125413883	734.029145747776	1070.29927116166
TCGA-AA-3556-01A-01R-0821-07	-761.271691703078	527.72605686298	-233.545634840097
TCGA-DM-A1D4-01A-21R-A155-07	-1787.48272460157	-91.6749982836901	-1879.15772288526
TCGA-RU-A8FL-01A-11R-A37K-07	-2201.55127438534	-676.439517815875	-2877.99079220121
TCGA-AA-3975-01A-01R-1022-07	-479.200495185001	572.157712509114	92.9572173241139
TCGA-F4-6460-01A-11R-1774-07	-15.8256658520448	425.743578071314	409.91791221927
TCGA-AZ-4308-01A-01R-1410-07	15.6947181703049	606.012640363718	621.707358534023
TCGA-AA-3972-01A-01R-1022-07	-723.313362917938	43.4444870524291	-679.868875865509
TCGA-AA-3858-01A-01R-0905-07	-403.33861875921	447.688089204204	44.3494704449942
TCGA-AA-3679-01A-02R-0905-07	-697.433717462015	405.433507523584	-292.000209938431
TCGA-AY-5543-01A-01R-1653-07	-1183.00208166356	516.774392534476	-666.227689129085
TCGA-AU-6004-01A-11R-1723-07	-19.9933794347904	1151.4485611107	1131.45518167591
TCGA-DM-A28A-01A-21R-A32Y-07	-615.199033492655	-202.591634726602	-817.790668219257
TCGA-AA-3848-01A-01R-0905-07	-963.821597433592	342.412914940379	-621.408682493214
TCGA-AA-3667-01A-01R-0905-07	-726.222353170287	630.118110324491	-96.1042428457951
TCGA-AA-3811-01A-01R-1022-07	-560.692239439262	664.647540370933	103.955300931671
TCGA-G4-6303-01A-11R-1774-07	-178.048603288956	159.782201786227	-18.2664015027297
TCGA-QG-A5Z2-01A-11R-A28H-07	-1656.24945185253	810.631905095049	-845.617546757481
TCGA-CA-5256-01A-01R-1410-07	-741.432729902799	516.667720151603	-224.765009751197
TCGA-G4-6317-01A-11R-1723-07	-1784.98799304203	-816.171185547315	-2601.15917858934
TCGA-CM-5341-01A-01R-1410-07	674.323347778009	1540.25336274191	2214.57671051992
TCGA-F4-6854-01A-11R-1928-07	-258.533380389616	339.963407011608	81.4300266219922
TCGA-AA-3947-01A-01R-1022-07	51.4657749661441	888.701608142586	940.16738310873
TCGA-CM-6162-01A-11R-1653-07	1383.07311847011	1723.69311787156	3106.76623634167
TCGA-AA-3867-01A-01R-1022-07	163.949351647535	458.504630291893	622.453981939429
TCGA-CA-6719-01A-11R-1839-07	182.365947411619	655.033268625009	837.399216036629
TCGA-NH-A50V-01A-11R-A28H-07	-67.3409068780954	604.754477196873	537.413570318778
TCGA-AA-A01C-01A-01R-A00A-07	-290.515755584425	165.444872812904	-125.070882771521
TCGA-AA-A02F-01A-01R-A089-07	-1059.07779476761	-633.893694506779	-1692.97148927439
TCGA-AA-A03F-01A-11R-A16W-07	-1195.842171268	521.225277093689	-674.616894174308
TCGA-AA-A00O-01A-02R-A089-07	-32.9079822217429	330.320500363708	297.412518141965
TCGA-AZ-4615-01A-01R-1410-07	-24.7663742305679	1393.60735117205	1368.84097694148
TCGA-AA-3854-01A-01R-0905-07	-1040.25722345293	164.140388747532	-876.1168347054
TCGA-AA-A01V-01A-23R-A083-07	-1675.95691137801	407.342149417022	-1268.61476196098
TCGA-AA-A00D-01A-01R-A002-07	-49.0794795793275	1674.67534454208	1625.59586496275
TCGA-A6-5657-01A-01R-A32Z-07	31.4814101025021	706.366482774362	737.847892876864
TCGA-AA-3522-01A-01R-0821-07	-1134.39814194298	506.305745025171	-628.092396917805
TCGA-AA-3877-01A-01R-1022-07	58.9305437901462	1279.33490406394	1338.26544785408
TCGA-D5-6923-01A-11R-A32Z-07	200.312500131449	227.708437929565	428.020938061013
TCGA-AZ-6599-01A-11R-1774-07	-1909.33192551156	-405.366251677627	-2314.69817718919
TCGA-D5-6922-01A-11R-1928-07	183.46404935729	335.213713600859	518.677762958149
TCGA-AA-3692-01A-01R-0905-07	-383.034560915645	944.721425024051	561.686864108406
TCGA-A6-3810-01B-04R-A277-07	479.119576242304	602.278242516419	1081.39781875872
TCGA-4T-AA8H-01A-11R-A41B-07	-1963.17746555388	-533.732363564921	-2496.9098291188
TCGA-AA-A01Q-01A-01R-A002-07	-1091.08105589613	660.647848164775	-430.433207731359
TCGA-AA-3979-01A-01R-1022-07	-1258.79375688479	-142.072445666934	-1400.86620255172
TCGA-A6-A565-01A-31R-A28H-07	97.5310833869315	1770.64917961201	1868.18026299894
TCGA-A6-5667-01A-21R-1723-07	-438.270466062213	-87.4947594783902	-525.765225540603
TCGA-AA-3842-01A-01R-1022-07	-71.4788343463304	540.053679983857	468.574845637527
TCGA-A6-A5ZU-01A-11R-A28H-07	131.846567574868	854.252002887207	986.098570462076
TCGA-A6-6780-01A-11R-A278-07	-456.149270311807	1441.96656476644	985.817294454631
TCGA-AA-3870-01A-01R-1022-07	264.437481829066	1135.01766394777	1399.45514577684
TCGA-NH-A6GC-01A-12R-A41B-07	-323.583749663746	-126.574634151295	-450.158383815041
TCGA-AA-3511-01A-21R-1839-07	-57.216159164099	234.466179095329	177.25001993123
TCGA-CM-6167-01A-11R-1653-07	1160.33801448573	1072.35236225629	2232.69037674202
TCGA-CM-5348-01A-21R-1723-07	704.350947989967	1071.75220828975	1776.10315627972
TCGA-AA-3949-01A-01R-1022-07	361.599673566675	2090.65230260026	2452.25197616694
TCGA-AA-3952-01A-01R-1022-07	-133.714461049447	428.571220972034	294.856759922587
TCGA-AA-3532-01A-01R-0821-07	1.04823249637674	1355.91096797711	1356.95920047349
TCGA-AA-3989-01A-01R-1022-07	-112.451066340125	998.19843849874	885.747372158615
TCGA-AA-3530-01A-01R-1022-07	-1163.5188602233	495.730057317598	-667.7888029057
TCGA-NH-A5IV-01A-42R-A37K-07	-342.243051535962	1015.95707120171	673.714019665748
TCGA-CK-4947-01B-11R-1653-07	-182.912023439141	980.427960319993	797.515936880851
TCGA-AA-3521-01A-01R-0821-07	-577.278679668121	252.963535023436	-324.315144644685
TCGA-AA-3554-01A-01R-0826-07	287.128143466238	1580.76168395613	1867.88982742237
TCGA-D5-5538-01A-01R-1653-07	275.624546747186	1259.79356450062	1535.4181112478
TCGA-AY-A54L-01A-11R-A28H-07	-2076.15487912667	-650.134743133688	-2726.28962226036
TCGA-A6-2671-01A-01R-1410-07	119.98559685829	547.322722628874	667.308319487164
TCGA-NH-A8F8-01A-72R-A41B-07	-299.88350430334	230.395773747448	-69.487730555892
TCGA-AA-3516-01A-02R-0826-07	-652.31018540624	889.889596541597	237.579411135356
TCGA-G4-6628-01A-11R-1839-07	-107.746372455069	1754.54067519143	1646.79430273636
TCGA-AD-6964-01A-11R-1928-07	827.978399107231	1970.09402215181	2798.07242125904
TCGA-AD-6888-01A-11R-1928-07	-2032.87440055942	-320.13999548815	-2353.01439604757
TCGA-AA-3973-01A-01R-1022-07	-729.586313878507	-86.04221950695	-815.628533385457
TCGA-AA-3680-01A-01R-0905-07	-952.082628881207	597.471079903489	-354.611548977718
TCGA-AA-3514-01A-02R-0821-07	88.1284653380542	488.893257147664	577.021722485718
TCGA-QG-A5YW-01A-11R-A28H-07	-723.746236031916	640.521146510195	-83.2250895217204
TCGA-AY-A69D-01A-11R-A37K-07	-1108.32282033836	-158.774632192501	-1267.09745253086
TCGA-5M-AAT5-01A-21R-A41B-07	-1525.63044964355	-463.829425995173	-1989.45987563873
TCGA-AA-3673-01A-01R-0905-07	-662.561381670554	357.834276404763	-304.727105265791
TCGA-AA-3855-01A-01R-1022-07	-764.465589728461	754.92202618198	-9.54356354648121
TCGA-CM-6172-01A-11R-1653-07	-473.068010918369	115.574644626975	-357.493366291394
TCGA-AZ-6600-01A-11R-1774-07	158.629365573579	774.765976063989	933.395341637569
TCGA-F4-6463-01A-11R-1723-07	20.2322546498252	212.559193056673	232.791447706498
TCGA-AA-3971-01A-01R-1022-07	-633.78013241373	1068.52356336445	434.743430950717
TCGA-AA-3666-01A-02R-0905-07	-721.936617975214	730.956382583961	9.01976460874744
TCGA-D5-6898-01A-11R-1928-07	33.9419480096619	673.901158267437	707.843106277099
TCGA-D5-6537-01A-11R-1723-07	-1459.24361359126	-17.4025543365457	-1476.64616792781
TCGA-SS-A7HO-01A-21R-A37K-07	-1491.85246082391	-694.117867531078	-2185.97032835499
TCGA-CK-5915-01A-11R-1653-07	-1345.60060881035	-657.253131614738	-2002.85374042509
TCGA-AA-A00L-01A-01R-A002-07	-1247.11933595188	-203.988407039828	-1451.10774299171
TCGA-G4-6321-01A-11R-1723-07	-1376.32171948898	819.343697446533	-556.978022042443
TCGA-AA-3489-01A-21R-1839-07	1286.52941015532	1954.04120194513	3240.57061210045
TCGA-AA-A01S-01A-21R-A083-07	-1721.3862428987	-547.948338319636	-2269.33458121834
TCGA-DM-A1HB-01A-21R-A180-07	-1139.81996837136	-157.077939714913	-1296.89790808627
TCGA-D5-6931-01A-11R-1928-07	-285.095330719555	795.354864537633	510.259533818078
TCGA-T9-A92H-01A-11R-A37K-07	-1468.81161214691	-281.520125068036	-1750.33173721495
TCGA-A6-5656-01B-02R-A277-07	1057.95975160131	708.323255796212	1766.28300739752
TCGA-AD-6965-01A-11R-1928-07	-888.306043906132	-146.83964011823	-1035.14568402436
TCGA-DM-A1D7-01A-11R-A155-07	-1066.15902907486	-28.8027051573495	-1094.96173423221
TCGA-A6-6140-01A-11R-1774-07	-1295.36656616191	160.901256002371	-1134.46531015954
TCGA-AA-3662-01A-01R-1723-07	-342.64092167563	920.420626136455	577.779704460825
TCGA-A6-2678-01A-01R-0821-07	-470.275011657778	617.758637145995	147.483625488217
TCGA-CM-6675-01A-11R-1839-07	-990.377211505982	-170.110903822956	-1160.48811532894
TCGA-AY-4071-01A-01R-1113-07	-269.628320022194	1315.65709144546	1046.02877142326
TCGA-CA-5797-01A-01R-1653-07	-290.008883355003	279.282919944627	-10.7259634103767
TCGA-AA-3681-01A-01R-0905-07	-764.296466582292	913.203919342176	148.907452759883
TCGA-AA-A00Q-01A-01R-A002-07	-775.245481718124	226.804991371215	-548.44049034691
TCGA-A6-2684-01C-08R-A277-07	1067.15037866969	805.148133037965	1872.29851170766
TCGA-AM-5820-01A-01R-1653-07	-579.725916428341	-73.7643139040475	-653.490230332389
TCGA-CK-6746-01A-11R-1839-07	-955.294762933838	1218.64019459652	263.345431662684
TCGA-AA-A00W-01A-01R-A002-07	-1827.47068995072	1.59583178396589	-1825.87485816675
TCGA-AZ-4323-01A-21R-1839-07	208.140681705098	2039.37315716608	2247.51383887117
TCGA-CM-4746-01A-01R-1410-07	-1353.10762199696	61.7284612254358	-1291.37916077153
TCGA-A6-6137-01A-11R-1774-07	-906.88390619783	709.848147370785	-197.035758827045
TCGA-AA-3860-01A-02R-0905-07	-24.0714443344498	982.503717533539	958.432273199089
TCGA-A6-2674-01A-02R-A278-07	1057.68534593058	1580.49727192522	2638.1826178558
TCGA-AA-3986-01A-02R-1022-07	-517.986364924267	1565.1067783738	1047.12041344953
TCGA-CM-6165-01A-11R-1653-07	124.170638063124	591.066513257227	715.237151320351
TCGA-A6-5656-01A-21R-A278-07	-1028.79152508139	-315.233419628297	-1344.02494470968
TCGA-AA-3520-01A-01R-0821-07	-16.9419218064385	671.099132885735	654.157211079296
TCGA-G4-6625-01A-21R-1774-07	71.4041835693853	1650.37978130871	1721.78396487809
TCGA-DM-A28M-01A-12R-A16W-07	-1861.47533721176	-350.627295906949	-2212.10263311871
TCGA-D5-6920-01A-11R-1928-07	-733.543087111138	763.988696869125	30.4456097579871
TCGA-DM-A288-01A-11R-A16W-07	-1510.20427963655	-510.737185578998	-2020.94146521555
TCGA-AA-A02O-01A-21R-A16W-07	-1109.18094757619	252.827137872516	-856.353809703675
TCGA-AA-A02E-01A-01R-A00A-07	-1221.14768190523	67.3851853241049	-1153.76249658113
TCGA-AA-3710-01A-01R-1022-07	-47.5378468149559	2015.1843249961	1967.64647818114
TCGA-AZ-4614-01A-01R-1410-07	-1642.40083026874	-86.4365724900013	-1728.83740275874
TCGA-G4-6320-01A-11R-1723-07	-1533.33039796775	-94.6056166777085	-1627.93601464546
TCGA-A6-6781-01B-06R-A277-07	1964.94733731451	2069.70709165222	4034.65442896672
TCGA-AA-3856-01A-01R-0905-07	-627.042201877615	1225.21320538846	598.171003510843
TCGA-A6-6138-01A-11R-1774-07	232.631257954184	1542.2307096688	1774.86196762298
TCGA-A6-2685-01A-01R-1410-07	672.133525718782	1373.06478794698	2045.19831366576
TCGA-QG-A5YX-01A-11R-A28H-07	-1658.82272625263	-248.210507995755	-1907.03323424839
TCGA-DM-A1D8-01A-11R-A155-07	-1347.05881074233	-422.247524581367	-1769.3063353237
TCGA-AM-5821-01A-01R-1653-07	-329.381876819102	1254.85685936536	925.474982546258
TCGA-A6-6650-01A-11R-A278-07	-1325.38978796503	-454.486634617649	-1779.87642258268
TCGA-CK-5916-01A-11R-1653-07	-94.2246803285832	1425.88277517826	1331.65809484968
TCGA-NH-A50T-01A-11R-A28H-07	-1387.97302055721	-628.06586245683	-2016.03888301404
TCGA-WS-AB45-01A-11R-A41B-07	1978.52600577553	2266.51910198431	4245.04510775984
TCGA-AA-A00Z-01A-01R-A002-07	-1058.99302665698	87.4190378209156	-971.573988836062
TCGA-CM-6674-01A-11R-1839-07	-185.118266391374	736.758809103761	551.640542712387
TCGA-AA-3833-01A-01R-0905-07	-74.9105625745955	1047.13418551823	972.223622943633
TCGA-A6-A566-01A-11R-A28H-07	1609.6305745909	1776.81140522071	3386.44197981162
TCGA-CA-6715-01A-21R-1839-07	-1346.02388966135	-527.386941887109	-1873.41083154846
TCGA-NH-A6GA-01A-11R-A37K-07	-973.936932508629	-7.37474572972587	-981.311678238355
TCGA-AA-A004-01A-01R-A00A-07	-468.479036827426	915.903445343779	447.424408516353
TCGA-AD-6889-01A-11R-1928-07	-1079.94898248409	52.0721134838497	-1027.87686900024
TCGA-D5-6536-01A-11R-1723-07	-314.805851438674	510.09880405152	195.292952612846
TCGA-G4-6322-01A-11R-1723-07	-892.043608799468	133.607733628623	-758.435875170845
TCGA-AA-A029-01A-01R-A00A-07	-1453.87680483298	-193.93039766888	-1647.80720250186
TCGA-AZ-5407-01A-01R-1723-07	-1384.35685806552	499.449744537988	-884.907113527536
TCGA-AA-A00N-01A-02R-A00A-07	275.62813922837	672.140159803	947.76829903137
TCGA-D5-6540-01A-11R-1723-07	-715.056534875425	552.420459134277	-162.636075741148
TCGA-AA-3548-01A-01R-1873-07	-515.258100794703	765.251459377262	249.99335858256
TCGA-A6-6649-01A-11R-1774-07	-180.645073305402	717.946753176233	537.301679870831
TCGA-DM-A282-01A-12R-A16W-07	-951.299745381217	-474.367942437644	-1425.66768781886
TCGA-AA-3655-01A-02R-1723-07	-483.836553179045	343.37815724879	-140.458395930255
TCGA-G4-6311-01A-11R-1723-07	-108.416611881123	594.183328206266	485.766716325143
TCGA-G4-6297-01A-11R-1723-07	341.345546522109	750.54188872348	1091.88743524559
TCGA-5M-AAT6-01A-11R-A41B-07	341.485321865784	1478.80683289772	1820.2921547635
TCGA-D5-6534-01A-21R-1928-07	1486.53937379646	2231.42189981331	3717.96127360977
TCGA-DM-A1DB-01A-11R-A155-07	-1819.03029166703	-28.4779605483335	-1847.50825221537
TCGA-CM-6678-01A-11R-1839-07	-913.759258762519	-332.910646979589	-1246.66990574211
TCGA-AA-3660-01A-01R-1723-07	-721.775930108626	169.382196650696	-552.39373345793
TCGA-DM-A0XF-01A-11R-A155-07	-688.039073233902	161.025226915824	-527.013846318078
