# Supplementary material for: A Novel Prognostic Chemokine-Related lncRNAs Signature Associated with Immune Landscape in Colon Adenocarcinoma
Source: Dis Markers. 2022 Nov 3;2022:2823042. doi: 10.1155/2022/2823042 (PMC9649319; doi:10.1155/2022/2823042)
Supplement: Supplementary Materials — Supplementary Figure S1: (A) Heatmap of the expression of prognostic chemokine-related lncRNAs between tumor tissues and normal tissues. (B) Boxplot of the expression of prognostic chemokine-related prognostic lncRNAs in COAD tissues and normal tissues. (C) Barplot showed the proportion of 22 kinds of TIICs in each COAD sample. (D) Correlation between 22 kinds of TIICs was visualized. ∗p < 0.05; ∗∗p < 0.01; ∗∗∗p < 0.001. Supplementary Figure S2: Survival analysis was conducted in high-risk and low-risk patients with different clinical parameters. Supplementary Figure S3: Risk stratification showed the differences in drug susceptibility between high-risk and low-risk groups. Supplementary Table S1: Clinical information of the COAD patients. Supplementary Table S2: The 64 chemokine genes. Supplementary Table S3: Expression of 52 chemokine-related lncRNAs in COAD. Supplementary Table S4: Immune cell content of COAD samples was calculated using the CIBERSORT algorithm. Supplementary Table S5: Immune, Stromal, and ESTIMATE scores for COAD samples. Supplementary Table S6: Expression of 10 chemokine-related lncRNAs and risk score in the entire cohort. Supplementary Table S7: The immune cell infiltration status in all tumor samples in RNA-seq. Supplementary Table S8: Tumor mutation burden data of the low-risk group. Supplementary Table S9: Tumor mutation burden data of the high-risk group. Supplementary Table S10. The immunotherapy score data was obtained from the TCIA database. Supplementary Table S11: Quantitative real-time PCR primer sequences of model lncRNAs. Supplementary Table S12: The correlation values of immune cell infiltration and patient risk score. Supplementary Table S13: The correlation values of chemokine-related lncRNAs and immune cells. [file 2823042.f1.zip › Supplementary Table 6 (1).txt]

id	futime	fustat	AL513318.2	AP003555.2	VIM-AS1	AC004846.1	MYOSLID	SNHG26	AL161935.3	AC004540.2	AL137782.1	AC073611.1	riskScore	risk
TCGA-D5-6532	1.520547945	0	0	0.09129956	0.07261493	0	0.0343258	0.02359817	0.05955082	0.0937149	0.9496204	0.4790758	0.774767437	low
TCGA-DM-A0XD	2.035616438	1	0.03541567	0.8395443	0.09837093	0.08176955	0.177549	0.8069569	0.05133741	0.1211842	0.2515631	1.954868	3.862560618	high
TCGA-AA-3492	0.002739726	1	0.506398909	1.22772412	0.11624619	0.030368841	0.076931033	0.141035347	0	0	0.487733177	1.073705149	2.441192853	high
TCGA-G4-6293	8.97260274	0	0.195293649	0.180840768	0.172597625	0.056363028	0.081588626	0.186967463	0.070772842	0.083531212	0.83467234	0.493440946	1.013804615	low
TCGA-AA-3715	1.58630137	1	0.450784121	2.28986573	0.813053689	0.148684861	0.322844442	0.295930497	0	0.661062428	0.279108215	2.703510331	8.908806413	high
TCGA-AA-3552	1.084931507	1	0.7609409	1.555038	0.371039	0.1384749	0	0.02009652	0.3042856	0.3591398	0.6191681	0.9791695	3.440798173	high
TCGA-CM-6166	1.161643836	0	0	0	0.1409684	0.03682742	0.1399381	0.08551476	0	1.400862	0.3360568	0.7812308	1.254796532	low
TCGA-AZ-5403	5.232876712	1	0.05619256	0.1998105	0.2837837	0.09637853	0.1502451	0.08607494	0.5213115	0.1794594	0.5520374	1.048465	1.896632114	high
TCGA-G4-6304	4.468493151	0	0	0.1835954	0.04172064	0.06812092	0	0.7908976	0	0.2826786	0.1889711	1.605632	2.159905742	high
TCGA-DM-A28K	8.18630137	0	0	1.593637	0.1040195	0.04529109	0.05736621	0.1226957	0.06634862	0.1566189	0.4243104	0.8896048	3.035375472	high
TCGA-G4-6627	3.928767123	0	0.09183112	0.2380982	0.5217363	0.1893076	0.1534586	0.2813311	0.3327886	0.3404102	0.6301795	0.8567119	1.681490774	high
TCGA-AA-3864	4.416438356	0	0	0.13353491	0.204827268	0.13377571	0.075307478	1.069956725	0.391946126	0.205601369	0.292974569	0.98097593	3.377278858	high
TCGA-CA-6717	1.063013699	0	0.08612878	0.2871171	0.5437095	0.376411	0.1439295	0.4782491	0.4369732	0.2947128	0.1140619	0.3682771	2.306920484	high
TCGA-AA-3819	2.084931507	0	0.01870797	0.0554351	0.188958	0.3208693	0	0.1002981	0	0.4267623	0.270276	1.512599	0.940081249	low
TCGA-AA-3861	2.504109589	0	0.20331348	0.1721299	0.14668198	0	0	0.13347111	0.33681903	2.38522868	0.2098065	0.54192985	2.421314181	high
TCGA-AA-3531	2.835616438	0	0	0.582004195	0	0.018509642	0	0.021490067	0.162692815	0.256029056	0.972885902	1.745113043	1.330621039	low
TCGA-AA-3685	3.087671233	0	0.1001473	0	0.2326513	0.1849802	0.117149	0.1687445	0.5806809	0.7538976	0.9983181	1.27687	1.502834184	high
TCGA-AZ-4616	0.42739726	1	0.4373422	0.3394087	0.1577619	0.2678952	0.1914107	0.2631806	0	0.07126114	0.3961492	1.748596	1.461798559	low
TCGA-AA-A02J	0.419178082	1	0.1797765	0	0	0	0.03338043	0.0458965	0	0.2278347	0.432875	1.180233	1.026974319	low
TCGA-AA-A02Y	3.331506849	0	0	0.026602535	0.054406991	0.029611674	0	0.0137519	0	0.163837834	0.860354502	0.78171158	0.722941725	low
TCGA-AA-3850	0.003	1	0.06147516	0.273243	0.1552309	0.0811069	0.05136546	0.3060419	0.1782248	0.2804717	0.3848598	1.14703	1.725354676	high
TCGA-CK-6747	0.243835616	0	0.3528097	0.3982625	0.1357531	0.1274522	0.05615038	0.08363777	0.09741362	0.5940353	0.3600317	0.2612251	1.400994125	low
TCGA-AA-A00R	0.082191781	0	0	0.07679987	0.7591698	0.1367793	0	1.012373	0	0.1773711	0.3369966	1.370171	2.14584494	high
TCGA-A6-6653	0.77260274	0	0.34766036	0.446411604	0.105345278	0.122315654	0.154926388	0.133135258	0	0.105743408	0.474364726	0.288301966	1.26877313	low
TCGA-AD-6890	2.043835616	0	0.200551953	0.212239917	0.202565527	0.066149267	0.14363213	0.351088612	0.08306104	0.359460304	0.676058811	1.826444219	1.602942957	high
TCGA-D5-6539	1.04109589	0	0.09154102	0.1695329	0.3004954	0.1207741	0.07648693	0.05258295	0.1990424	0.1044107	0.4243029	0.5693371	1.224146029	low
TCGA-A6-3808	0.764383562	0	0.10934945	0.16201112	0.82835504	0.23443806	0.1370501	0.25124983	0.95105662	0.62361422	0.25013229	0.59508412	3.621324533	high
TCGA-AZ-6608	0.161643836	1	0.1882197	0.8365935	0.0665383	0.02483266	0	0.01441561	0.05456744	0.1073407	0.8429611	1.141362	1.409722033	low
TCGA-G4-6306	3.723287671	0	0	0.1954611	0.09993833	0.0326356	0	0.1389322	0	0.07523702	0.833856	1.589745	0.976804862	low
TCGA-F4-6806	1.317808219	0	0.096444918	0.333414392	0.292239723	0.021207342	0	0.061555379	0.186404588	0.293344181	0.348337439	0.749795889	1.54486495	high
TCGA-F4-6809	1.104109589	1	0.369791857	0.533831922	0.430966877	0.206411939	0.158450723	0.341317455	0.714717788	0.410965845	0.529675966	1.9755646	3.945490376	high
TCGA-AD-5900	1.01369863	0	0.02434911	0.3246787	0.1598582	0.07228092	0.06103456	0.1585148	0.1411827	0.05554468	0.3517741	0.4164563	1.407585853	low
TCGA-D5-6930	1.112328767	0	0	0.237746243	0.378182026	0.1764259	0.067038912	0.235559134	0.232607635	0.366053739	0.341302619	0.914851462	1.603274285	high
TCGA-AA-A03J	3.41369863	0	0.07118867	0	0.07190342	0.1408836	0	0.05452288	0	0.1623941	0.3428234	1.10689	0.910712323	low
TCGA-AA-3815	2.753424658	0	0.10382033	0	0.57674486	0.1540966	0	0.23854568	0	0.11841638	0.21248627	0.96856183	1.146884619	low
TCGA-CM-6169	0.665753425	0	0.05048674	0.1496013	0.5099363	0.4163087	0.2109205	0.1546697	0.1463679	0.2303386	0.4619452	1.413004	1.138951354	low
TCGA-AA-3517	3.249315068	0	0	0.2258757	0.2566426	0.117332	0.08492227	0.1946068	0.4419874	0.05796282	1.064557	2.212442	1.55396443	high
TCGA-AA-3518	0.084931507	0	0.02416331	0.4296016	0.2196532	0.111579	0.1211377	0.6662341	0.1401054	0.2204834	0.3141809	1.502831	2.59721651	high
TCGA-AA-3984	0.003	0	0.1098547	0	0.332873	0.04348085	0.03671556	0.3365476	0	0.05011965	0.3491581	1.981392	1.4070764	low
TCGA-CM-4752	0.336986301	0	0.5923247	0.1462638	0.2991358	0.08140418	0.1237289	0.07560952	0.2862049	0	0.2971311	0.920987	1.703943772	high
TCGA-AA-3663	0.580821918	0	0.025526903	0.226922515	0.064457993	0.07577724	0.149302701	0.195508676	0.07400595	0.116462878	0.405668804	2.103621985	1.564961587	high
TCGA-AA-3561	1.161643836	0	0.3811148	0.06643014	0.113218	0.08873324	0.03746351	0.05151054	0	0.153422	1.414288	2.021755	0.68664734	low
TCGA-AY-6386	0.98630137	0	0	0.861017169	0.076089815	0.02839736	0.053952626	0.098909725	0.12480108	0.98199489	0.502714162	0.568934752	2.04719351	high
TCGA-AU-3779	1.208219178	0	0	0.2126562	0.3745147	0.03156143	0.09994015	0.1648955	0.06935328	0.8185574	0.5068865	1.934174	1.608132359	high
TCGA-AD-A5EJ	0.003	0	0.010654598	1.483860621	0.118377285	0.021085623	0.089024295	0.481456401	0.185334728	0.072915137	0.348903642	0.828324971	4.435926555	high
TCGA-AA-A00F	2.835616438	0	0	0.9174352	0.4264365	0.1299723	0.5644263	0.08622881	0.3264021	0	0.6235078	1.663037	3.080964473	high
TCGA-AA-3866	1.419178082	0	0.561166389	0.346424514	0.448717134	0.215941733	0.117220388	0.125356354	0.271149562	0.373368643	0.371581335	0.945251679	1.794893662	high
TCGA-AA-A01K	2.583561644	0	0	0.8983204	0.4593069	0.09999337	0	0.5804716	0	0.1152607	0.07299659	0.6285003	2.787922191	high
TCGA-A6-3809	0.860273973	0	0.00871938	0.180834523	0.407757067	0.258240043	0.045182143	2.821576	0.334912667	0.285287357	2.772033	2.086377	3.40589721	high
TCGA-NH-A8F7	1.487671233	0	0.294723905	0.30328913	0.030516635	0.059344815	0.02524466	0.100967125	0.0836566	0.1877893	0.5868682	0.6810868	1.190226171	low
TCGA-D5-6932	0.947945205	0	0.009967824	0.1181459	0.1812222	0.02630198	0.1332576	0.1145142	0.1155923	0.06821518	1.363259	1.177898	0.817137129	low
TCGA-A6-2680	1.430136986	0	0	0.201407111	0.022884108	0.239135175	0.113584243	0.034705095	0	0.310103012	1.811185662	0.563649369	0.440003106	low
TCGA-CM-5862	0.419178082	1	1.432073	0.04160287	0.08508539	0.2222821	0.1876967	0.04301233	0	0.3523037	0.7504947	0.6112472	0.941973947	low
TCGA-AA-3555	2.495890411	0	0.01917624	0.3977587	2.924684	0.03795009	0.2243174	0.234991	0	1.137355	0.3786228	0.6559637	2.432464637	high
TCGA-DM-A28G	5.065753425	1	0.01878243	0.1391393	0.1612535	0.2230244	0.03138725	0.08631194	0.1089056	1.842381	0.2668291	1.489415	1.471285153	low
TCGA-5M-AATE	3.287671233	0	0.01637777	0.1941212	0.03308442	0.06482376	0.02736884	0.163067	0.09496277	0.4856883	0.9622197	1.222334	1.019606933	low
TCGA-AA-A024	3.254794521	1	0.2614036	0	0.02640282	0.03448814	0	0.02002071	0	0.5366777	0.2769452	0.5690277	1.024542069	low
TCGA-CM-4747	0.668493151	0	0	0.354996	0.211759	0.01975756	0.1001006	0.04587786	0	0.2049679	0.3173127	1.024523	1.364819921	low
TCGA-AA-3930	0.167123288	1	0	0.3863508	0.09876966	0.3225396	0.3268259	2.14699	0.7560006	0.4461432	0.7848618	2.027297	11.15332769	high
TCGA-AD-6963	2.284931507	0	0.1426724	0.09947394	0.2288725	0.4096859	0.07012334	0.09641626	0.04866196	0.2105926	1.378177	0.9395444	0.512482902	low
TCGA-DM-A1D6	1.561643836	1	0	1.557303	0.04423564	0.02476367	0.02091063	0.6181491	0	2.583292	0.3645696	1.225744	5.827194176	high
TCGA-AZ-6603	2.463013699	1	0.4112572	0.2074263	0.1767601	0.07503901	0.04386704	0.07371845	0.202943	0.1596853	0.5140851	0.8163203	1.347557537	low
TCGA-AZ-4315	4.865753425	0	0.106727	0.5534402	0.1077986	0.05280364	0.08917558	0.04087073	0.3094161	0	0.8480431	0.6637861	1.474112201	low
TCGA-A6-2672	1.378082192	0	0.063696255	5.0402585	0.4786074	0.29429485	0.23968315	0.28375307	0.13846195	0.19077355	6.960267	1.0896649	1.150818627	low
TCGA-G4-6310	3.75890411	0	0.5683053	0.3157484	0.2152542	0.4334725	0	0.408057	0.2059492	0.04051269	0.3078887	0.9388675	1.498349756	high
TCGA-AA-A00K	1.504109589	0	0	0.523108494	0.050945305	0.049909696	0	0.115892327	0	0	0.352203014	1.097961878	1.396758546	low
TCGA-D5-6529	1.682191781	0	0	0.3195228	0.495062	0.310399	0.08190727	0.1351423	0.0568394	0.2236199	0.3918218	0.6706522	1.099462667	low
TCGA-AA-A01I	2.583561644	0	0.6784495	0.1030958	0.2108496	0.0229515	0	0.1199122	0.1008675	0.1190511	0.1926816	0.8655588	1.482458748	low
TCGA-G4-6588	2.180821918	0	0.0121199	1.077403	0.1713821	0.08794673	0.1012676	0.3156063	0.1405489	0.0552953	0.554475	1.017622	2.51389982	high
TCGA-CM-6679	0.334246575	0	0.009526887	0.2822989	0.2982987	0.06284622	0.1751238	0.102152	0.4419158	0.282523	0.5505437	1.362801	2.03781315	high
TCGA-AA-3519	0.756164384	0	0	0.220436359	0.150277397	0.098148385	0.062157927	0.028488064	0.215671884	0	1.074745962	1.735041974	1.002112123	low
TCGA-DM-A0X9	9.975342466	0	0.01393401	0.5161124	0.1125913	0.05515127	0	0.0480238	0.04039658	0.2542878	0.2918938	1.538254	1.557427617	high
TCGA-A6-3810	0.676712329	0	0.063080717	0.6384914	0.527084433	0.2947984	0.437797767	1.310054733	0.530727733	0.58146869	4.926025967	0.8930288	0.68382631	low
TCGA-A6-4107	0.632876712	0	0.040574759	0.240460722	0.327857088	0.214128302	0	0.03107591	0.117631722	1.064420377	0.635036737	0.946326294	1.080361995	low
TCGA-AA-3875	1.504109589	0	0.4714686	0	0.507949	0.4354206	0	0.04814591	0.1822468	0.2151009	0.3027269	1.759372	1.047471609	low
TCGA-G4-6295	0.695890411	0	0.4066835	0.5272212	0.474949	0.07545313	0.06371319	0.07786898	0.2947577	0.05798237	0.7772664	0.8299455	1.653045095	high
TCGA-DM-A28F	2.997260274	1	0	0.4684303	0.2184968	0.04390877	0.01390384	0.06372372	0	0.01897984	0.6571077	0.7244608	1.09820938	low
TCGA-CM-4743	0.504109589	0	0	1.64626	0.2870999	0.03409258	0.1079551	0.3760306	0.299661	0.02947346	1.319068	1.968754	3.601102423	high
TCGA-AA-A00U	1.419178082	0	0	0.2175473	0.1235899	0.06457468	0.1226865	0.09371564	0	0.05582562	0.318198	0.9132278	1.203475595	low
TCGA-AA-A01X	2.167123288	0	0.03973139	0.176597	0.02006515	0.1441533	0.03319749	0.07607495	0	3.716011	0.3061352	0.8648792	1.65426992	high
TCGA-CM-5861	0.917808219	0	0	0	0.06325241	0.02065554	0.05232508	0.2158335	0	0.03571395	0.1583278	0.9250298	1.230006106	low
TCGA-CK-4948	8.536986301	0	0.1859223	0.3213708	0.289508	0.09198582	0.2071294	0.3619245	0.08983565	0.05301526	0.7200076	1.108158	1.538369235	high
TCGA-AA-3968	1.832876712	0	0.2005636	0.07428829	0.3291881	0.1819211	0.04189514	0.3456229	0.1453653	0.05719019	0.4587808	1.403325	1.374927988	low
TCGA-AA-3818	0.082191781	1	0.037537973	0.222463629	0.189574302	0.111432396	0	0.057500116	0.326483006	1.498539723	0.488083498	0.817132634	1.64654558	high
TCGA-AA-3562	1.665753425	0	0.319495925	0.126229907	0.086054324	0.112406697	0	0.163133054	0.123501595	0.048588496	1.271906802	0.596129027	0.749583846	low
TCGA-AA-3872	0.003	0	0.03649849	0.2163033	0.2949195	0.1565007	0.121985	0.2096544	0.3174422	0.04162979	0.6239686	1.021506	1.487308334	low
TCGA-AA-3845	0.003	1	0.026985314	6.077140461	2.61660011	0.160213138	0.18038024	0.227346393	0	0.923375039	0.311887711	1.342675791	91.44697705	high
TCGA-AA-A010	2.915068493	0	0	0	0.2829831	0	0	0.5900958	0.4061256	0	0.4722256	0.6534417	2.05936436	high
TCGA-AA-3529	0.003	1	0.3873698	0	0.07336108	0.06388427	0.08091654	0.5006538	0.1403797	0.44183	0.1748866	1.581062	2.068657867	high
TCGA-AA-A02H	0.167123288	1	0	0	0	0	0.2502124	0.172015	1.302258	0	0.2523683	1.396858	5.283486938	high
TCGA-D5-7000	0.854794521	0	0.1880048	0.5292377	0.5032149	0.1178205	0.1413784	0.2303864	0	0.1072182	1.009493	1.081594	1.215270266	low
TCGA-CA-6716	1.016438356	0	0	0.2086726	0.08129014	0.06636474	0.08405833	0.09246096	0	0.61963	0.3730435	0.7508344	1.194507665	low
TCGA-AA-A01G	1	0	0.02564533	0	0.07770845	0.06767005	0.04285582	0.05892472	0.14869859	0.1170032	0.50635108	1.91400595	1.165014949	low
TCGA-D5-6535	1.260273973	0	0.163616	0.06926056	0.1534546	0.09251394	0.01952987	0.07160704	0.06776358	0.1066393	0.664109	1.090292	0.940983904	low
TCGA-CK-6748	0.167123288	0	0	0.4341067	0.1044502	0.07958762	0.1872122	0.03300101	0.1499026	0.01965843	0.8217015	0.7771611	1.196343216	low
TCGA-D5-5539	1.632876712	0	0.02103966	0.4675824	0.2656363	0.2012495	0.05273895	0.04834236	0.1219936	0.3359666	0.2938301	0.7524199	1.392603364	low
TCGA-A6-4105	1.210958904	1	0.060178237	0.035663803	0.389007588	0.349341569	0.140789084	0.940237412	0.418715661	0.302010143	0.562212798	2.208234343	2.654300892	high
TCGA-G4-6307	4.58630137	0	0.3214328	0.04053037	0.0690766	0.07218392	0.02285724	0.1414243	0.1189631	0.1248078	0.4544969	1.063374	1.184716531	low
TCGA-CK-5914	1.832876712	0	0.009600239	0.3129197	0.1939325	0.04433107	0.08021463	0.1691133	0.1669944	0.02189987	1.539522	0.9851893	0.864987069	low
TCGA-A6-5666	0.991780822	0	0.3650858	0.1744863	0.08326642	0.07768932	0	0.1352983	0.273144	0.2149228	0.4253574	0.5127255	1.444699583	low
TCGA-4N-A93T	0.4	0	0.01088805	0.9033712	0.2089499	0.2298413	0.05458493	0.1250861	0.06313185	0.02483759	0.4876323	2.099256	1.811248705	high
TCGA-AA-3697	7.087671233	0	0.1055224	0.04466887	0.2892937	0.06961021	0.05038233	0.1500922	0.2622204	0.03438794	1.451899	1.875126	0.907955406	low
TCGA-G4-6586	2.983561644	0	0.156291111	0.216122141	0.252576478	0.041240356	0.087059168	0.039900738	0	0.071305604	0.592085694	1.393269631	1.108552814	low
TCGA-AA-3544	1.167123288	0	0	0.07975689	0.2718621	0.2130686	0.08995835	0.06184423	0.3121322	0.1842004	0.531439	1.088121	1.209997221	low
TCGA-CM-6676	0.419178082	0	0.02092364	0.06200053	0.2113371	0.1104219	0.06993083	0.2003158	0.1819814	0.3102487	0.3879337	0.7482707	1.314024839	low
TCGA-A6-A56B	4.687671233	1	0.02886236	0.08552441	0.2332172	0.03807939	0.1929271	0.4863204	0.1673518	0.3950413	0.4308768	2.423368	2.237984024	high
TCGA-D5-6927	0.78630137	0	0.01381604	0	0.3070047	0.2460796	0.2077914	0.455009	0.3204366	0.0945506	0.6986063	0.8592852	1.42292142	low
TCGA-AA-A00E	2.501369863	0	0	0	0.21703062	0.09449727	0.11969131	0.49370955	0	0	0.20695309	1.78186501	1.598975682	high
TCGA-AA-3814	0.003	0	0.2996725	0.1902823	0.3026813	0.2259264	0.2861609	0.09836442	0.2482261	0.2441452	0.7112586	0.9319028	1.311206711	low
TCGA-A6-2676	1.224657534	0	0.2406492	0.1426174	0.2187588	0.1269997	0.201074	0.01843115	0	0.1097928	0.1738342	1.571547	1.320360055	low
TCGA-AA-A02K	1.167123288	1	0.3072928	0.19315	4.796752	0.03685681	0.09336651	1.055524	0.2159717	0.1911791	0.3811684	1.18726	5.499038929	high
TCGA-F4-6570	0.515068493	1	0.03087889	0.7624979	3.867426	0.1833295	0.3440107	0.1261329	0.4774511	0.07044028	0.4014995	1.248328	4.521363503	high
TCGA-DM-A1D9	11.69863014	0	0.007391793	0.08761289	0.2986403	0.1170278	0.09881918	0.0283066	0.04285962	0.9105482	0.565987	1.287246	1.090211338	low
TCGA-AA-3956	2.835616438	0	1.185957	0.4016236	0.1368988	0.06705797	0	0.02595189	0	0.386483	0.342673	1.053719	1.537353042	high
TCGA-AA-3955	1.747945205	0	0	0	0.166935766	0	0	0.025316791	0	0.377024994	0.557145121	1.027932133	0.922832289	low
TCGA-AZ-6598	4.117808219	1	0	0.608158934	0.116605775	0.067695068	0.064307504	0.835075487	0	0.819325231	0.518892906	1.116916311	2.633997657	high
TCGA-A6-6780	0.969863014	0	0.00780494	0.264429763	0.810966072	0.143105249	0.187677046	0.709314826	0.131758149	0.596458662	1.687745067	2.194349449	1.438051958	low
TCGA-DM-A1DA	0.624657534	1	0	3.358963	0.05986655	0.0146624	0.1114293	0.4596302	0.04295899	0.0845055	0.6564973	1.175031	11.51977998	high
TCGA-AA-3494	0.084931507	0	0.07960742	0.0589728	0.12061	0.131287	0	0.289611	0	0.7717949	0.5079594	0.6188954	1.073672571	low
TCGA-CM-6168	0.495890411	0	0.07015825	0.356385608	0.52640826	0.297523559	0.251231133	0.568041849	0.232455166	0.365813798	0.458525882	0.810359547	2.101301154	high
TCGA-AA-3851	2.756164384	0	1.04439732	0.206315897	0.515720694	0.168412397	0.193920949	0.159979247	0.403713239	0.264717487	0.201180221	0.577386889	2.367136959	high
TCGA-DM-A28E	9.994520548	0	0	0	0.08268728	0.02700214	0.01710061	0.01567502	0.05933468	0.1167184	1.222141	0.8592065	0.639472393	low
TCGA-AA-3841	3.079452055	0	0.048788498	0.144569157	0.147835027	0.032184412	0	0.037366752	0	0	0.516891831	1.062035864	0.97512245	low
TCGA-A6-3807	0.912328767	0	0.6194374	0.6762388	0.1975758	0.1290397	0.1634431	0.3246049	0	0.6693384	1.271711	1.115219	1.407884778	low
TCGA-AA-3846	1.419178082	0	1.066778	0.2155266	0.4897677	0.03198745	0.04051566	0.07427615	0	0.2212284	1.015781	2.035677	1.177652794	low
TCGA-F4-6703	2.989041096	0	0.09435765	0.8387964	0.7386139	0.4201545	0.4730422	0.5179195	0.683889	0.161435	0.348372	1.907279	5.44354362	high
TCGA-F4-6461	0.926027397	1	0.03686162	0.3640922	0.4219594	0.1296884	0.1026655	0.1035175	0.3562228	5.549805	0.3846149	0.5349398	3.59693177	high
TCGA-A6-5656	1.265753425	0	1.742543	0.35724356	0.546658167	0.478584917	0.294130897	1.0449656	0.45275027	0.4076289	3.555191167	2.370760667	1.052660048	low
TCGA-AA-3664	4.501369863	0	0.03592231	0.2128886	0.2902638	0.1184847	0	0.4952274	0	0.6555618	0.4151787	0.8936716	1.507564663	high
TCGA-G4-6317	3	0	0.36798265	0.39604754	0.07987606	0.034038045	0.031806955	0.12436195	0.0735746	0.060773855	0.60856625	0.6549255	1.289832348	low
TCGA-A6-6648	0.942465753	0	0.04416469	0.4486902	0.1210792	0.05826844	0.08434681	0.4638914	0.03658269	0.1295326	0.780854	0.9025239	1.501700651	high
TCGA-AA-3966	0.167123288	0	0.1174724	0.2320614	0.4746075	0.2970576	0.2617437	1.109646	0.2270457	0	0.3771414	1.583003	3.140815828	high
TCGA-A6-2684	1.060273973	0	0.065809337	1.992096616	0.357414297	0.34472802	0.146364704	1.469323028	0.346747233	0.724589867	3.843374962	1.825087505	2.432333019	high
TCGA-3L-AA1B	0.956164384	0	0.6962787	0.06655484	0.4310361	0.2074329	0.07506767	0.1720241	0.2604653	0.6148399	0.5732669	1.117545	1.458173679	low
TCGA-AA-3950	2	0	0.082688418	0.163347174	0.417593115	0.14545932	0.368480835	0.063330452	0	0.125751396	0.331835601	2.571392536	1.545465498	high
TCGA-CM-5349	0.917808219	0	0.050615914	0.037496031	0.306744635	0.692840587	0.084584069	0.203523372	0.14674239	0.519587851	0.091406671	1.023114254	0.935778483	low
TCGA-AY-6196	0.016438356	0	0.16963233	1.75927963	1.05656871	0.62478461	0.47245328	0.54133398	1.55732582	0.32246811	0.27229954	2.06608857	23.84997716	high
TCGA-G4-6302	0.003	0	0.04806139	0.1780183	0.3640795	0.3249738	0.2208668	0.5797554	0.6966824	0.5481832	0.1620145	0.8967498	3.472097234	high
TCGA-DM-A280	0.646575342	1	0.02396956	0.2130784	0.04842043	0.05534218	0.2002772	0.2386554	0.138982	0	0.3058901	0.6708513	1.571648799	high
TCGA-A6-2679	1.630136986	0	0	0	0.2207127	0.2883014	0	0.0557873	0	0	2.981576	1.812096	0.218135473	low
TCGA-D5-6533	2.123287671	0	0.09409965	0.1045629	0.1900889	0.05431555	0.0196562	0.03603512	0.06820191	0.1073291	0.8043516	0.8412974	0.871452204	low
TCGA-CM-6170	0.663013699	0	0.02987095	0.1180174	0.1910821	0.05911511	0.06655632	0.04575589	0.1154666	0.340705	0.5034736	0.8669809	1.137286034	low
TCGA-AA-3684	0.003	0	0.066523425	0.098560479	0.134382661	0.263301896	0.055583526	0.331173714	0	0.075875924	0.224249859	1.137787043	1.166395178	low
TCGA-A6-5660	0.936986301	0	0.05226925	0.2168366	0.09502927	0.1930912	0.1222857	0.05604569	0.1818428	0.09538842	0.7400365	0.8127181	1.012664738	low
TCGA-CM-5868	1.167123288	0	1.648818	0.6581835	0.2329796	0.157798	0.1427634	0.1046895	0.1486056	0.5651618	0.6829408	1.062672	2.108209459	high
TCGA-CM-6164	1.334246575	0	0.01784027	0.5022075	0.1982133	0.08826546	0.05962561	0.2801065	0.05172135	0.0813937	0.872021	0.7766997	1.243720785	low
TCGA-DM-A1HA	7.123287671	0	0	0.1343726	0.7603251	0.005982886	0.0909359	0.2292263	0.1051747	0.04137824	0.5459491	0.6204817	1.341149416	low
TCGA-G4-6323	1.147945205	0	0	0.567496337	0.442145741	0.126337709	0	0.146680629	0.079318652	0.21844105	0.250334071	1.063507433	1.684672134	high
TCGA-D5-6924	1.191780822	0	0.03365559	0.0498638	0.5099024	0.06660496	0.196846	0.180436	0.3902884	0.1535488	0.5024333	0.8896103	1.737072712	high
TCGA-F4-6856	1.619178082	0	0.249785152	0.158605426	0.270313966	0.047078944	0.059630722	0.040994703	0	0.203501671	0.317906823	0.776766192	1.161929177	low
TCGA-CA-5254	0.18630137	0	0.05132734	0.27883571	0.164168469	0.073361634	0.100068418	0.288282371	0.14880491	0.097572381	0.140067044	0.798072702	1.822705075	high
TCGA-AA-A02R	1.835616438	1	0	1.090570155	0.37173551	0.128533736	0.036178285	0.364785082	0.125529265	0.04938623	0.375325893	1.615777001	2.885971559	high
TCGA-CK-6751	1.419178082	0	0.022806411	0.202738577	0.115176953	0.112835651	0.076223419	0.235808041	0	0.026012754	0.389892456	0.81560236	1.173975077	low
TCGA-F4-6805	1.35890411	0	0.121218229	0.319281397	0.340097999	0.2132381	0.247582304	0.237258164	0.312380502	0.245795996	0.259444793	0.795797779	2.026888578	high
TCGA-AZ-6601	8.334246575	1	0	0.995647006	0.593914435	0.283994027	0.228108807	0.313638756	0.365297722	0.119764087	0.444978906	1.208154932	3.095051399	high
TCGA-AA-3556	1.917808219	0	0.06832433	0.1349716	0.2990447	0.1201911	0.03805885	0.06977214	0.1320543	0.6753935	0.2741913	0.3541179	1.252206184	low
TCGA-DM-A1D4	7.728767123	1	0.2962198	0.8519366	0.1759964	0.05747292	0.07279585	0.02001817	0	0.07949769	0.3230616	1.21919	1.851255274	high
TCGA-AA-3975	2.838356164	0	0.02533167	0.1501246	0.230274	0.1169742	0.04233166	0.03880268	0.1468799	0.1155721	0.8417292	1.339172	0.966603214	low
TCGA-F4-6460	1.115068493	0	0.1078704	0.1775776	0.4600257	0.1660379	0.1602328	0.1193359	0.3474788	0.5194848	0.9465929	0.484537	1.238752312	low
TCGA-AZ-4308	5.610958904	0	0.09660772	0	0.1219721	0.3505118	0	0.07399114	0.1400394	0.1101898	1.325917	1.351911	0.549981019	low
TCGA-AA-3679	1.252054795	0	0.03173921	0.1880981	0.06411575	0.02093747	0.05303928	0.3403236	0.1840325	0.2172085	0.6419555	0.987006	1.493491106	low
TCGA-AY-5543	1.312328767	0	0.463108073	0.076237395	0.303176321	0.079203571	0.014331448	0.032841766	0.099452817	0.078254257	0.954025785	0.853418919	0.85461763	low
TCGA-AA-3667	1.167123288	0	0.47217447	0.34978462	0.19871466	0.07787009	0.19726226	0.09040874	0	0.35903819	0.70110412	1.83542318	1.399121978	low
TCGA-G4-6303	5.487671233	1	0.05934864	0.2512297	0.222651	0.05033654	0.1275137	0.1753252	0.04915992	0.1740663	0.5226154	0.606407	1.257730184	low
TCGA-QG-A5Z2	2.608219178	0	0.4163053	0.3272785	0.3432531	0.08967347	0.04259304	0.4229579	0.09852453	0.1938096	0.2536688	1.056816	2.005393998	high
TCGA-F4-6854	0.043835616	0	0.1276557	0.07565339	0.1633207	0.06736872	0	0.1108066	0.1973819	0.0582411	0.7745871	1.190927	1.065195116	low
TCGA-AA-3867	2.002739726	0	0	0.310041491	0.15852272	0.172555879	0.08742449	0.080136343	0.303340306	0	0.314920674	1.626879228	1.679009919	high
TCGA-NH-A50V	1.610958904	0	0.1102496	1.425555	0.3745629	0.1454572	0.08374443	0.2149366	0.2905714	0.2514991	0.1834119	1.745405	4.541347854	high
TCGA-AA-A01C	1.252054795	0	0	0.14481645	0	0.03223947	0.08166974	0	0.28337282	0.11148568	0.44717018	1.97572614	1.526963604	high
TCGA-AA-A02F	3.331506849	0	0.093064086	0	0.093998464	0.07673973	0	0.089096374	0	1.592218879	1.041992547	2.242887615	0.957648741	low
TCGA-AA-A03F	0.003	0	0	1.19150925	0.20307098	0.07957719	0	0.18478145	0	0.0917273	0.19364164	0.62522008	2.341838224	high
TCGA-AA-3854	3.002739726	0	1.025922747	0.054285624	0.129527897	0.048340903	0	0.042093573	0.212449214	0.668661019	0.247026875	0.227882156	1.517774057	high
TCGA-A6-5657	1.005479452	0	0.1082903	0.3636681	0.4010509	0.2190706	0.1930277	0.2432869	0.1255793	0.625808	0.2885598	1.032713	1.778791853	high
TCGA-D5-6922	0.843835616	0	0.3706936	0.137304	0.2340096	0.1039279	0.06194647	0.1419557	0.2686727	0.1057023	0.709597	0.9222077	1.29613931	low
TCGA-AA-3692	3	1	1.455003	0.2129106	0.2721504	0.2606933	0.03001791	0.4540052	0.5207719	0.245861	0.3633188	1.284785	2.902750407	high
TCGA-AA-A01Q	0.084931507	0	0.3221631	0	0.2440482	0.01771017	0	0.143933	0.1556657	0.1224853	0.09050073	1.252303	1.567255608	high
TCGA-A6-A5ZU	0.802739726	0	0	0.5044465	0.05731579	0.168452	0.2844844	0.1086535	0.658058	0.1941719	0.6968437	1.058792	2.466924259	high
TCGA-NH-A6GC	1.065753425	0	0	1.912423	0.1629688	0.1300901	0.08987648	0.05492262	0.1039494	2.290186	0.1813018	1.282256	5.533195228	high
TCGA-AA-3949	2.167123288	0	0	0.20851283	0.46198362	0.37135793	0.17638731	0.78146671	0.40801213	0.08026089	0.28804016	0.65647702	2.437481451	high
TCGA-AA-3989	0.663013699	1	0	0.138432256	0.212339235	0.123272789	0.195173384	0.089451372	0.406320612	0.053285432	0.472452258	1.089592367	1.63990505	high
TCGA-AA-3554	1.495890411	0	0.12213918	0.14476821	0.39476953	0.27394417	0.04082127	0.50514571	0.28327842	0.27862135	0.54113095	1.06349813	1.6221097	high
TCGA-D5-5538	1.021917808	0	0.03488944	0.413535	0.2819179	0.283859	0.2137799	0.1068863	0.1348656	0.6367125	0.5264537	1.482792	1.45810919	low
TCGA-NH-A8F8	1.4	1	0.01289253	0.6494493	0.4036811	0.1275726	0.1077233	0.2567316	0.3737719	0.05882034	0.3104329	1.964527	2.92926637	high
TCGA-AD-6888	1.293150685	1	0	0	0.04385481	0.01718534	0.01451143	0.00665084	0	0	0.7360051	0.4860767	0.725511943	low
TCGA-AA-3973	1.087671233	0	0	0.3002007	0.05116372	0.03341578	0.08464961	0.2521766	0	0.1155534	0.463486	0.6300966	1.288785533	low
TCGA-AY-A69D	1.487671233	0	0.443308238	0.286604207	0.407053749	0.031902337	0.067346434	0.098771352	0.046734932	2.518970439	0.919921988	0.877273181	1.488602127	low
TCGA-AA-3855	2.671232877	0	0.2239021	0.06031477	0.3495047	0.06713726	0.06802945	0.1247163	0.2360446	0.2785968	0.5097161	1.012766	1.383068602	low
TCGA-CM-6172	0.580821918	0	0.115222838	0.034142614	0.186207509	0.068408365	0.019254846	0.352993299	0.133618645	0.289128327	0.249695446	1.110769525	1.567101862	high
TCGA-AZ-6600	1.008219178	1	0.01935901	0.430232	0.3128541	0.1149354	0.2749816	0.815481	0.3367464	0.1987262	0.5640247	1.505036	3.426906481	high
TCGA-AA-3971	1.339726027	0	0.1059468	0.3924245	0.3477842	0.05241762	0.1327855	0.2231457	0.1535771	0.6646301	0.3826561	0.9060335	1.93732574	high
TCGA-D5-6537	0.4	1	0	0.2767032	0.07335846	0.041067	0.190725	0.2701845	0	0.5207096	0.3647505	0.8066353	1.540167124	high
TCGA-SS-A7HO	5.010958904	0	0.6350092	0.3393135	0.08411604	0.0961405	0.01739609	0.01594587	0.06035993	6.625426	1.348534	1.780478	2.060325084	high
TCGA-CK-5915	0.003	0	0	0.1386118	0.1181192	0.007714542	0	0.03582696	0.06780794	0.5068682	0.3829574	0.254568	1.09790466	low
TCGA-AA-A00L	3.169863014	0	0	0	0.1024368	0	0	0.09709465	0	0.2313539	0.6471319	0.6307701	0.863112092	low
TCGA-G4-6321	1.84109589	0	0.17836408	0.075503583	0.167286678	0.033617661	0.021290254	0.097576956	0.073871661	0.20344021	0.386526659	0.396189589	1.107241861	low
TCGA-DM-A1HB	11.30410959	0	0	0.07472973	0.08490877	0.0332731	0.04214409	0.1738384	0	0.2109434	0.5465215	0.9411094	1.035668702	low
TCGA-D5-6931	1	0	0.07840622	0.5642345	0.4751606	0.1108337	0.1310244	0.2745177	0.1298916	0.2555123	0.7389799	1.079786	1.689952481	high
TCGA-AD-6965	2.205479452	0	0	0.312044864	0.199433794	0.112886066	0.109986744	0.282289539	0.228975284	0.480450029	1.166396516	0.368413092	1.147306085	low
TCGA-DM-A1D7	1.109589041	1	0	0.165328614	0.177114088	0.047321928	0.013319664	0.018313904	0.09243156	2.672812596	0.322426412	1.313685325	1.722877718	high
TCGA-A6-6140	0.975342466	0	0	0.2906127	0.07704609	0.03594281	0.03642046	0.05842246	0.06318477	0.2734425	0.8816227	0.6438597	0.953023423	low
TCGA-CM-6675	0.419178082	0	0.330486	0.261144	0.4228185	0.06540372	0.1104548	0.1603073	0.1916247	0.02512992	0.2334232	0.7194072	1.752926931	high
TCGA-AA-3681	0.498630137	0	0	0.17609832	0.45019112	0.11761059	0	0.18206435	0	0.3389194	1.20200383	0.83163591	0.751575449	low
TCGA-AA-A00Q	3.501369863	0	0	0.1394377	0.2376461	0.01552101	0.1179546	0.1261415	0.1364239	0.1073449	0.260603	1.317007	1.551430544	high
TCGA-AA-A00W	1.249315068	0	0	0	0.1494758	0.03254161	0	0.03778146	0.1430143	0.1125305	0.6414077	1.687436	1.047055008	low
TCGA-AZ-4323	0.117808219	1	6.055455	0.2836903	0.9669965	0.4499863	0.09999258	0.5407745	0.2775587	18.12691	0.3746012	2.456201	61.91663543	high
TCGA-AA-3860	2.589041096	0	0.424074	0.4188694	0.452128	0.1398749	0.1181114	0.09022088	0	0.2687191	0.1021107	1.465288	1.742524212	high
TCGA-AA-3986	1.589041096	0	0	0.456560593	0.555802931	0.101640866	0.147130822	0.067432627	0	1.004226247	0.243797674	1.026732091	1.696495733	high
TCGA-DM-A288	1.169863014	1	0.246917821	0.115525616	0.065630767	0.060010191	0.152019172	0.328458631	0	0.029645462	0.438083015	1.414459688	1.402821892	low
TCGA-AA-A02E	0.246575342	1	0	1.96053	0.2227576	0.04849543	0.1228497	0.2064487	0	0.3353993	0.5900394	0.3810177	3.553504371	high
TCGA-A6-2685	1.271232877	0	0	0.2579114	0.4615409	0.172251	0	0.1999868	0.1261685	0.1489131	0.3353218	1.556338	1.451371493	low
TCGA-QG-A5YX	2.747945205	0	0.983768617	0.971694873	0.077933005	0.095435991	0.048352122	0.140350607	0	0.022001495	0.306546434	0.539869749	2.134989123	high
TCGA-NH-A50T	1.515068493	0	0.04936635	0.3803318	0.1196688	0.06513122	0.03299837	0.6503204	0	0.0225227	0.3946378	0.8903951	1.839839247	high
TCGA-CM-6674	0.410958904	0	0.038974336	0.192480029	0.183706341	0.248532738	0.13025974	0.129350683	0.150655838	0.059271628	0.287789431	0.646399701	1.208348549	low
TCGA-A6-A566	2.076712329	1	0.041306456	0.693591565	0.667538869	0.336067519	0.598234585	0.474544666	0.878188743	0.157045709	0.351424544	2.226505224	6.930287019	high
TCGA-AA-A004	1.161643836	0	0.05622849	0.1666152	0.3407582	0.2596466	0	0.215325	0	0.1282673	1.028963	0.3497117	0.674661889	low
TCGA-D5-6536	1.487671233	0	0.8456196	0.4235027	0.2405943	0.1335653	0.2985447	0.2827784	0.2071746	0.543383	0.1491247	1.518533	2.967239924	high
TCGA-G4-6322	2.169863014	0	0.008660066	0.7185176	0.5510619	0.02856402	0.05788722	0.1392863	0.1506402	1.086534	0.09174944	0.8617769	2.711193491	high
TCGA-AA-A029	4.331506849	0	0	0	0.1202923	0.02618823	0	0.3648607	0	0	0.4588267	0.9876239	1.145265626	low
TCGA-AA-A00N	0.334246575	1	0	0.491196197	0.251146249	0.018225258	0.184674539	0.190439028	0	0.315119254	0.199570499	1.804216017	2.066389801	high
TCGA-DM-A282	11.59726027	0	0.4773592	0	0.1546525	0.03564912	0.01505119	0	0.1044475	0.4520136	0.1821706	1.568488	1.392725457	low
TCGA-AA-3655	5.084931507	0	0	0.351183	0.3830575	0.09381768	0.03961018	0.2632335	0.06871852	0.8381011	0.4965398	0.8845253	1.54213945	high
TCGA-G4-6311	3.284931507	0	0.08836983	0.1870399	0.2677712	0.657902	0.1687709	0.2900649	0.07319889	0.2303856	0.4620395	0.9421952	0.868620892	low
TCGA-D5-6534	3.605479452	0	0.048764921	1.155994354	0.902999689	0.445002553	0.258054457	0.25521608	0.329877591	0.407885574	1.268121379	1.339540469	2.008739702	high
TCGA-CM-6678	0.334246575	0	0.633839	0.187818	0.1371863	0.03583937	0.07565758	0.07628542	0.05250243	1.487212	0.5014623	0.9010619	1.502775925	high
TCGA-AA-A022	0.003	0	0.107901837	0.767358451	0.479534829	0.256247404	0.108188619	0.413206119	0	0.246143418	0.207849205	2.147496706	2.416116931	high
TCGA-AD-6899	0.482191781	1	0.008575862	0.3811775	0.4157743	0.3790362	0.1003176	0.4729097	0.09945034	0.3716985	0.4831959	0.7200543	1.413702702	low
TCGA-AA-3844	1.243835616	0	0.023057835	0.068324543	0.093157359	0.015210611	0.077063729	0	0.133695576	0.262995266	0.455262557	1.362372388	1.206373515	low
TCGA-AD-6901	1.868493151	1	0.024943882	1.1086986	0.491289284	0.23036697	0.125050889	0.152834686	0.723156916	7.567894515	0.492501361	1.745300655	11.80235655	high
TCGA-AA-A01P	3.17260274	1	0.021365687	7.913800261	0.625825867	0.155037834	0.142816488	0.114546761	0.247768087	0.194955841	0.380695843	0.664416739	230.6251875	high
TCGA-AY-A71X	1.610958904	0	0	0.8421204	0.3653339	0.1306646	0.05756567	0.1517043	0	0.5500719	0.1658905	0.9641137	2.048920333	high
TCGA-DM-A28C	6.780821918	1	0	0	0.03736299	0.04270406	0.01545413	0.08499476	0.05362182	4.620048	0.409723	0.4601365	1.72710085	high
TCGA-AA-3560	1.665753425	0	0.02936197	0	0.02965677	0.01936927	0.1472	0.02248812	0	0	0.07069924	1.552236	1.264558646	low
TCGA-G4-6299	6.21369863	0	0.2505978	1.215109	0.3796707	0.1427698	0.1713162	0.322793	0.198141	0.2858292	0.9105885	1.806543	2.912790584	high
TCGA-AA-3496	0.084931507	0	0.8465816	0.1730052	0.1474278	0.3979875	0.09756686	0.3130162	0.2821097	0.088791	0.4826656	1.210412	1.483243406	low
TCGA-A6-5661	0.838356164	0	0.2067255	2.241020042	0.597697547	0.059835433	0.2734878	1.08891779	0.058436782	0.147567604	2.893886126	0.250727213	2.943821728	high
TCGA-CM-5864	0.167123288	0	0.01503098	0.04453951	0.09109134	0.3172965	0.02511821	0.03453634	0.08715368	1.577264	0.6659392	0.9815902	0.87439659	low
TCGA-AY-A8YK	1.569863014	0	0.0112432	0.06663127	0.09084866	0.04450095	0.03757694	0.04305542	0.1303822	0.3334208	0.4060792	0.7342313	1.133209397	low
TCGA-CK-5913	4.276712329	0	0.019058656	0.028237126	0.202125088	0.081721019	0.111470979	0.226251716	0.110507253	0.152166733	0.284520468	0.355604482	1.258003205	low
TCGA-AZ-6605	0.435616438	1	0.5744805	0.3064122	0.5454335	0.3941275	0.09600123	0.1759962	0.5995789	0.4193578	0.420512	1.286268	2.228295644	high
TCGA-CM-4751	1.663013699	0	0.2479977	0.3980503	0.4383534	0.1635972	0.1554105	0.3007377	0.2396596	0.1885757	0.4329275	1.124678	2.003108452	high
TCGA-CM-6677	0.419178082	0	0	0.4319612	0.2617596	0.1389042	0.02706733	0.1240543	0	0.03694906	0.5304109	0.9570206	1.145153495	low
TCGA-A6-2677	1.482191781	0	1.151198	0.57026897	0.510022495	0.36785745	0.166568205	2.95625005	0.70243045	0.17840455	1.71849065	0.63117075	12.10551772	high
TCGA-AA-3526	1.589041096	0	0.06268065	0.3095569	0.2848949	0.1033717	0.06983027	0.1040144	0.3634394	0.2621406	0.2616045	1.494389	2.059251406	high
TCGA-CA-5255	0.254794521	0	0	0.452597589	0.106805061	0.054254637	0.078536612	0.053992052	0	0.268021771	0.260272362	1.571096397	1.533292033	high
TCGA-AA-3977	2.084931507	0	0	0	0.9214808	0.0316754	0.1604817	0.2574305	0	0.4381405	0.231235	1.194559	1.540696382	high
TCGA-AA-A01F	2.668493151	0	0	0.1545372	0.02633804	0.05160528	0.04357589	0	0.151197	0	0.4646287	0.8109021	1.099921138	low
TCGA-D5-5540	1.126027397	0	0	0.1133477	0.1803018	0.04205634	0.1917685	0.1367191	0.2957276	0.2326927	0.7491222	1.784307	1.532272048	high
TCGA-5M-AAT4	0.134246575	1	0	0.3041283	0.1762326	0.2640532	0.01715142	0.6131421	0	0.3043697	0.1779347	1.149013	1.685128188	high
TCGA-CM-6161	0.580821918	0	0.2667665	0.09120895	0.3938041	0.1218312	0.03429174	0.3300465	0	2.317142	0.5632775	0.5424136	1.459901235	low
TCGA-D5-6926	0.753424658	0	0.01066654	0.1264276	0.3339828	0.1970198	0.1604234	0.114372	0.3092376	0.09732919	0.3441582	1.359976	1.547117861	high
TCGA-AA-3712	0.003	0	0.2194173	0.05910667	0.1511048	0.0921095	0.1333336	0.4888731	0.05782914	0.2047624	0.7156391	0.9614654	1.312853065	low
TCGA-AA-3837	3.249315068	0	0.44442134	0	0.71821344	0.11726895	0	0.06807581	0	0	0.21402004	0.55281344	1.054079835	low
TCGA-D5-6928	0.969863014	0	0.063033274	2.583776305	1.421877092	0.471254669	0.245780907	0.458628856	0.670053999	0.119825159	0.172011338	1.600804853	15.26989415	high
TCGA-D5-6538	1.42739726	0	0	0.1509371	0.06173873	0.03360206	0.0510729	0.1950634	0.1181398	0.627467	0.5740017	1.045455	1.322495337	low
TCGA-NH-A6GB	1.304109589	0	0.1996685	0.6339148	0.2736993	0.06585786	0.0714997	0.3932347	0	0.06506851	1.195061	1.020077	1.294076382	low
TCGA-A6-2682	1.161643836	1	0.2708834	0.4013383	0.2280026	0.1786942	0.3017815	0.3112014	0.2617759	1.132878	0.891404	1.544356	2.041039089	high
TCGA-A6-6782	0.517808219	0	1.232243	0.4941689	0.3181723	0.16502	0.1083788	0.1206317	0.3223254	0.1902158	0.6112584	1.38296	2.164389615	high
TCGA-CM-5860	0.832876712	0	0.05484481	0.2437727	0.2769773	0.262302	0.1145637	0.1785222	0.3975063	0.1876662	0.4423947	1.407062	1.708466411	high
TCGA-AD-A5EK	1.369863014	0	0.008937158	0.1059297	0.06318822	0.07074713	0.07467426	0.1026736	0.1554602	0.6523922	0.5250719	1.25065	1.291050486	low
TCGA-AA-3506	4.835616438	0	0	0.283102785	0.048249696	0.126050355	0.079828401	0	0	0	0.92018569	1.188419108	0.806748931	low
TCGA-G4-6298	0.003	1	0.1357069	0.1096702	0.4112084	0.8626673	0.04123261	0.1606298	0.07153323	0.1407145	0.415879	1.304404	0.627477928	low
TCGA-AA-3678	3.917808219	0	0.01809282	0.1072246	0.2558426	0.107418	0.03023484	0.02771432	0.1049071	0.1238189	0.3572314	0.9564865	1.100737475	low
TCGA-A6-5665	1.106849315	0	0.027646865	1.91275395	2.7878765	0.166399785	0.33807955	1.2609306	0.06337435	0.07577895	11.4754712	0.75510595	0.039592301	low
TCGA-AA-A01T	2.753424658	0	0	0.3432169	0.05849505	0.01910199	0.09677919	0.04435559	0	0.06605564	0.613568	1.440768	1.174549169	low
TCGA-A6-6651	0.709589041	0	0.05609072	0.2216093	0.5759811	0.2898449	0.2030881	0.4653942	0.7588681	1.919295	0.3241394	0.9884219	4.0965433	high
TCGA-AA-3812	2.920547945	0	0	0.3402583	0.1159816	0.0757493	0.2558531	0.08794647	0	0.1746299	0.2027596	0.9522323	1.49918038	high
TCGA-A6-6650	0.761643836	0	0.06979241	0.8362274	0.29322501	0.163276617	0.16233279	0.66540869	0.19663834	0.029592967	5.381659333	0.664478067	0.230079263	low
TCGA-F4-6855	2.950684932	0	0.02980704	0.6182655	0.2709567	0.157303	0.2241469	0.1369739	0.08641463	0.03399759	0.2368439	1.761149	2.019038	high
TCGA-CM-4748	0.58630137	0	0	0	0.3438512	0.8982973	0.5688967	0.2607353	0	0	0.6557699	1.0586579	0.620711508	low
TCGA-D5-5541	0.95890411	0	0.3193195	0.3580222	0.2004888	0.1309422	0.1009539	0.1850758	0.2001623	0.07874865	0.5818504	0.9393241	1.51155365	high
TCGA-A6-2686	1.336986301	0	0.8893822	0.3370861	0.5640562	0.2592398	0.1209733	0.8158215	0.05996371	0.1179558	0.4930429	3.537581	3.004062838	high
TCGA-NH-A50U	0.915068493	1	0	0.2686234	0.08393357	0.1644548	0.01262426	0.144648	0.1314087	0	0.698498	1.597486	1.120169184	low
TCGA-AA-3543	0.082191781	0	0.048089744	0.356246558	0.267149151	0.095170392	0.040181298	0	0.139418682	0.109701321	0.312640888	0.373866171	1.284870054	low
TCGA-AA-3549	1.750684932	0	0	0	0.179039	0.07308312	0.1481086	0.2036423	0	0.05054501	1.429826	1.102459	0.659375486	low
TCGA-G4-6626	0.002739726	1	0	0.2868802	0.1412478	1.20636	0	0.7332595	0	0.02453913	0.528396	1.505345	0.642714569	low
TCGA-AA-3821	0.084931507	0	0.5326091	0.8680194	0.3765696	0.01756737	0.2670123	0.7342585	0.1544106	0	0.3975574	0.9109508	4.191493026	high
TCGA-CK-4952	1.301369863	0	0	0.2939061	0.1703092	0.04580117	0.08287469	0.5773404	0.05751074	0.3620177	0.3868967	0.7402618	1.885817057	high
TCGA-A6-2681	1.512328767	0	0.07822971	0.405665404	0.256799234	0.116113409	0.065364691	0.04493667	0.113399263	0.223069978	0.452077099	1.520461521	1.440053791	low
TCGA-AY-6197	1.15890411	0	0.1074128	0.2893488	0.09862843	0.05797411	0.03263585	0.2767153	0	0	1.11918	1.184273	0.948538028	low
TCGA-CM-4744	0.58630137	0	0.1032337	0.02353078	0.1363533	0.04190794	0.02654053	0.2493618	0	0.09057484	0.5430328	0.5679756	1.005468784	low
TCGA-CM-5863	0.832876712	0	0.04074088	0.784696942	0.185174661	0.147815926	0.187225321	0.343234544	0.413396649	0.627326402	0.127527339	0.823507301	3.708730401	high
TCGA-AA-3675	3.920547945	0	0.0275512	0.02721307	0.2875542	0.1635729	0.07673453	0.09847257	0.2662489	5.530732	0.3140055	0.9138881	2.659460991	high
TCGA-DM-A28H	9.756164384	0	0.1104055	0.1090505	0.08363547	0.05462356	0.01537485	0.1902572	0.2133869	0.06296366	0.3721758	1.373328	1.488917658	low
TCGA-G4-6314	2.994520548	0	0.029692134	0.469243578	0.449853712	0.326451218	0.08269736	0.2349902	0.229550713	0.090310768	0.462329311	0.861790852	1.493293578	low
TCGA-CA-6718	0.838356164	1	0.00973062	3.517698081	0.727295484	0.198989591	0.19512965	0.34282009	0.225683091	0.177578305	0.36082016	0.544674107	14.92116302	high
TCGA-AA-3982	2.252054795	0	0.05144106	0	0.441639	0.1187698	0.04298148	0.1575933	0	0.1760194	0.2229523	1.439714	1.181926678	low
TCGA-CM-6680	0.249315068	0	0.497135292	0.768574918	0.240147509	0.128326812	0.072240084	0.107603902	0.375981534	0.665640777	0.57249143	1.075450529	2.528939211	high
TCGA-A6-6142	1.008219178	0	0.1719297	0.6270262	0.187014	0.174488	0.2210085	0.03038762	0.07668422	0.03016941	0.4649325	0.8225479	1.475194099	low
TCGA-AD-6895	2.090410959	0	0.0454843	0.4380292	0.379013	0.1200189	0.07600864	0.1828895	0.1977977	0.2334551	1.117098	0.7779432	1.170317838	low
TCGA-CA-5796	0.271232877	0	0	0.508098665	0.283405526	0.041132518	0.026049456	0.023877842	0.090384855	0.106678724	0.255232294	0.145426019	1.423811049	low
TCGA-AA-3510	5.331506849	0	0.0406024	0	0.2255553	0.1205292	0.06785053	0.1088398	0.1177119	0.1852427	0.9189865	0.7575769	0.821178372	low
TCGA-AA-3527	0.003	0	0.154858721	0.065553492	0.067034369	0.072968559	0.073938241	0	0	0.15139735	0.543334578	1.16952698	0.93033461	low
TCGA-F4-6807	1.353424658	0	0.036084633	0.320775909	0.388767232	0.166628185	0.261303889	0.11054782	0.348714124	0.137192518	0.185357666	0.972518958	2.09282043	high
TCGA-AA-A01Z	3.084931507	0	0	0	0.027617232	0.018037222	0.228461485	0.020941578	0	0	0.645204106	1.020343597	0.919778037	low
TCGA-CK-5912	4.090410959	1	0	0.07853664	0.1472365	0.01748406	0.06643652	0.02029935	0.2305175	0.06046075	0.9700347	0.2884735	0.892894879	low
TCGA-AZ-6607	0.265753425	1	0.6399654	1.896333	0.5171126	0.2701871	0.2352776	0.2548753	0.519497	0.1167901	0.8505994	0.7960497	5.436140751	high
TCGA-A6-5659	0.783561644	0	0.296353733	0.08486845	0.172220133	0.157663867	0.029965303	0.214599537	0.147591433	0.09668122	1.952075267	1.118649633	0.574449955	low
TCGA-CM-5344	0.832876712	0	0.14374566	1.0484786	0.223367523	0.051059619	0.12934538	0.372624984	0.12822712	0.580147757	0.415341698	1.203491786	3.226841944	high
TCGA-AA-3831	1.498630137	0	0	0.058735567	0.380395356	0.02615177	0	0.030362733	0.229864265	0	0.324549856	1.232811437	1.346455779	low
TCGA-D5-6541	1.298630137	0	0.007772848	0.737035405	0.392544428	0.107678154	0.259783555	0.214314016	0.450690778	0.088656293	0.172185883	1.039375131	3.490250439	high
TCGA-F4-6808	2.805479452	0	0.2895141	0.1225547	0.0139248	0.01818899	0.1151919	0.02111778	0	0.1257969	0.7568588	1.028929	0.941093796	low
TCGA-AA-A017	1.252054795	0	0.08981251	0	0.1587499	0.0296234	0	0.1031801	0.2603786	0.1024392	0.443323	1.25682	1.33121325	low
TCGA-D5-5537	3.783561644	1	0	0.5999164	0.180432	0.1335552	0.0597044	0.00912119	0.06905293	0.4075062	0.3096969	1.074003	1.528493607	high
TCGA-D5-6530	1.701369863	0	0.034753989	0.343274555	0.351029251	0.12991535	0.058077265	0.195197385	0	0.184986844	0.195258971	0.576404137	1.376003154	low
TCGA-G4-6315	3.060273973	0	0.03855285	0.03807969	0.1168198	0.02543224	0.02147517	0.09842447	0.1490266	0.3517838	0.556977	0.559483	1.089988948	low
TCGA-A6-2675	2.317808219	0	0.1169369	0.4235062	0.2362218	0.1114244	0.1519877	0.1194148	0.452021	0.2074753	0.375422	0.8080953	2.219008696	high
TCGA-AA-A01R	2.917808219	0	0	0	0.2174457	0.1278153	0	0.4286999	0.1248276	0	0.4769024	2.008432	1.408457246	low
TCGA-A6-5664	0.991780822	0	0.05186958	0.2766581	0.3562545	0.2942655	0.08667907	0.1509608	0.3007539	0.5679543	0.2248096	1.064585	1.685605549	high
TCGA-AA-3862	2.504109589	0	0	0.095007711	0.356231221	0.042301794	0	0.073669854	0	0	0.262487795	0.897360311	1.091400231	low
TCGA-AA-3970	3.002739726	0	0.2532597	0.1667677	0.852675	0.07425262	0.1410738	0.5603571	0	0.5135385	0.4065411	1.400127	1.99654926	high
TCGA-CM-6171	0.498630137	0	0	0.1948673	0.1328463	0.04338193	0.03663203	0.2098637	0	0.4500506	0.3219726	1.05661	1.342230519	low
TCGA-G4-6309	4.312328767	0	0.067472477	0.159946538	0.081779894	0.044509713	0.067651806	0.299724712	0	0.092350084	0.123472372	0.839286701	1.475300543	low
TCGA-A6-A567	5.153424658	1	0.2636302	0	0.169449	0.04742986	0.4005013	0.03671135	0	0.1640148	0.9925684	0.9688789	0.8992399	low
TCGA-AA-3672	0.003	0	0.25374086	0.18797003	0.38443269	0	0	0.24292283	0	0.43412127	0.24438804	2.16993537	1.770266112	high
TCGA-AA-3553	2	0	0.02103369	0.06232663	0.2336936	0.0693767	0.03514932	0.1610955	0.121959	0.1439448	0.5368474	0.784911	1.113039432	low
TCGA-A6-2674	1.432876712	0	0.292092083	4.3734463	1.650373533	0.865855333	0.595576567	4.268782667	0.696876633	2.161046333	9.4151232	3.511318333	10.36174858	high
TCGA-CK-4951	5.846575342	1	0.03993692	0.4733613	4.255647	0.06586318	0.03336922	0.351755	0.1157825	0.3644131	0.2981026	1.366127	3.283660289	high
TCGA-A6-2683	1.293150685	0	0	0.2206236	0.07520253	0.01637196	0	0.01900818	0	0	0.7290578	0.6174279	0.858598253	low
TCGA-AA-3713	1.58630137	0	0.2235627	0.2880246	0.3141666	0.1603022	0.08121625	0.290338	0	0.04434665	0.622562	0.8765831	1.174815304	low
TCGA-F4-6704	0.128767123	0	0.5024654	0.8251713	0.2690416	0.1916891	0.2427956	1.251871	0.2808126	2.140519	0.230311	1.298975	8.531846607	high
TCGA-CM-6163	1.169863014	0	0.02909445	0.1149495	0.3722298	0.1343496	0.04861963	0.2228323	0.3936276	2.367185	0.2942314	0.6936501	2.331048604	high
TCGA-AA-3869	2.252054795	1	0	0.062882366	0.171474403	0.12599152	0.141850918	0.097519131	0.246092947	0.09681888	0.132853672	0.527939737	1.435734399	low
TCGA-AA-3538	2.167123288	0	0.06470187	0.1278156	0.2178383	0.02845468	0	0.08259114	0.125053	0.04919885	0.3427434	0.4694802	1.184317209	low
TCGA-AA-3852	0.003	1	0.02653073	0.3930769	0.2143769	0.03500317	0.04433541	0.6502302	0	3.933888	0.3577395	0.9900434	3.342790721	high
TCGA-A6-6654	1.093150685	0	0.02099577	0.4354999	0.8800728	0.3116323	0.1228009	0.1045233	0.2434783	0.1676329	0.4246593	1.469055	1.618762468	high
TCGA-AA-3509	5.246575342	0	0	0.252942285	0.431093904	0.056310758	0	0.065377926	0.123737616	1.995935449	0.996860801	0.729994561	1.1918464	low
TCGA-F4-6459	0.717808219	1	0.06197484	0.4284996	0.1043285	0.1499046	0.2071319	0.4667498	0.1796735	0.07068786	0.1840456	1.124232	2.361057616	high
TCGA-A6-6781	0.802739726	0	0.176229605	1.101878893	0.789821972	0.453695853	0.581990408	0.860554884	0.40250608	0.408405772	4.208811086	1.666644474	0.889766752	low
TCGA-DM-A1D0	10.88767123	0	0	0.020948298	0.028562037	0.004663572	0.070883195	0.027072506	0.204955251	0.048380593	0.878354417	0.945328376	0.951632913	low
TCGA-AA-A02W	3.416438356	0	0.4956124	0.06119122	0.2920099	0.06811285	0	0.4270341	0	0.04710753	0.5966803	1.798095	1.369537493	low
TCGA-AA-3524	3.002739726	0	0.1775598	0	0	0.03904375	0	0.2266529	0	0	1.25411	0.5521643	0.655017633	low
TCGA-CK-4950	3.361643836	0	0.015094113	0.111816479	0.320158869	0.184207567	0.025223717	0.225429172	0.043759878	0.275459008	0.221700657	0.610203435	1.178108133	low
TCGA-G4-6294	2.350684932	1	0.01059313	0.1569469	0.08559592	0.6009675	0.05310644	0.04867922	0.06142185	0.1933187	1.03047	0.9553139	0.499790192	low
TCGA-AZ-4313	4.197260274	0	0	0	0.06228721	0.02034035	0.2061065	0.04723111	0	0	0.9354711	0.7670858	0.77522008	low
TCGA-D5-6929	1.117808219	0	0.3213005	0.3311554	0.366856	0.1935223	0.2567898	0.2781793	0.3239978	0.03186713	0.5920056	1.390136	1.983544035	high
TCGA-F4-6569	1.120547945	0	0.147604984	0.601397922	0.251584249	0.310369727	0.154163844	0.247295941	0.320945132	0.294624235	0.191033282	0.745895667	2.220183041	high
TCGA-AA-A00A	3.169863014	0	0.04508835	0.13360494	0.13662313	0.14871763	0	0.17266417	0	0	0.34741122	1.26191622	1.073110785	low
TCGA-DM-A285	0.490410959	1	0.221407949	0.534577072	0.140804654	0.07573308	0.13703482	0.244941265	0.142642585	0.037412681	0.639740728	1.504544898	1.804007175	high
TCGA-AA-A00J	1.504109589	0	0	0	0.04865481	0.07944293	0.120748	0.3504924	0	0.1648306	0.1739834	1.647796	1.466404257	low
TCGA-AA-3534	2.416438356	0	0.72784465	0.07189118	0.07351523	0.20806016	0.04054328	0.14865357	0.42202405	2.04775765	0.26872299	1.20714967	2.305449577	high
TCGA-A6-6141	0.698630137	0	0.371258	1.263083	0.3194321	0.1360603	0.02297807	0.126375	0.07972795	0.6900716	0.2781128	0.4703579	2.697830688	high
TCGA-AA-3939	1.082191781	0	0.9668557	0	0.3695104	0.1379044	0.08733562	0.1200823	0.6060639	0.2384401	0.4152727	1.787748	2.400116766	high
TCGA-AA-3502	2.917808219	0	0.02712641	0.4822828	0.1095951	0.05368362	0	0.1869833	0.1572863	0.1856406	0.2612654	0.7592041	1.757785832	high
TCGA-AA-3693	0.003	0	1.631668	0	0.2522526	0.4942497	0.02782321	0.08926305	0.09653933	0.1139427	0.6574749	0.880194	0.829210732	low
TCGA-AD-6548	1.780821918	0	0.3609664	0.1125904	0.2590512	0.08772822	0.1428654	0.7711821	0.1101569	0.4333837	0.6084072	0.6498746	1.940450647	high
TCGA-AA-3941	2	0	0.8888778	0.1463281	0.07481686	0.04886399	0.08252225	0.05673208	0	0.2252988	0.8204426	1.99635	1.143750677	low
TCGA-A6-6652	1.249315068	0	0	0.03186884	0.1086292	0.02128421	0.07189018	0.08237132	0.06236007	0.9077562	0.818323	0.6354559	0.952842171	low
TCGA-AZ-6606	0.978082192	1	0.6163819	0.1739477	0.4743394	0.02581651	0.06539896	0.3896553	0	0.9373851	0.4381793	0.7910545	1.74759366	high
TCGA-AA-3542	1.082191781	0	0.1205653	0.08931424	0.03044396	0.0397668	0.1511072	0.02308503	0	0	0.9870314	2.718217	0.956514771	low
TCGA-QG-A5YV	3.564383562	0	0.4977121	0.433768	0.1084275	0.1287556	0.08154166	0.06726954	0.05658568	0.8459624	0.4605679	1.092532	1.519159495	high
TCGA-AA-3688	1.583561644	0	0.05859517	0.2893802	0.2367339	0.02576907	0.06527878	0.0149592	0.3397507	0.7128857	0.5925713	0.5466467	1.581515082	high
TCGA-AA-3980	0.663013699	0	0	0.6030134	0.3882521	0.05966428	0.1511429	0.5022179	0.1311067	0.3610636	0.3266683	0.4218919	2.466559141	high
TCGA-AA-3525	0.002739726	0	0.02331476	0.345429282	0.235488437	0.107660681	0	0.571411302	0.135185293	0.053185143	0.157187686	1.812569419	2.356465597	high
TCGA-AA-3994	2.252054795	0	0.09146392	0.06775604	0.5773889	0.04525215	0.152845	0.4903608	0.5303326	3.859943	0.4514745	0.8532862	4.315023	high
TCGA-AY-4070	1.35890411	1	0.53756	0.7618158	0.4721367	0.07708986	0.2343429	1.038233	0	0.1599483	0.8441505	1.598989	3.437790389	high
TCGA-AA-3495	3.087671233	0	0.3841069	0.08129846	0.2216934	0.05429671	0.1833942	0.546343	0	1.063977	0.3567364	0.7678746	1.900402367	high
TCGA-D5-6531	1.479452055	0	0.09954542	0.196647407	0.178746439	0.043778226	0.184833319	0.220252083	0.256529471	0.756936449	0.527319107	1.238240398	1.88187028	high
TCGA-QL-A97D	1.824657534	0	0.05708787	0.1353294	0.1614509	0.09791413	0.01907987	0.06995709	0.06620219	0	0.8467479	1.455732	0.897601575	low
TCGA-AA-3696	0.419178082	1	0	0	0.78687152	0.0856529	0	0.19888949	0	1.18476801	0.18758354	1.21132	1.431501219	low
TCGA-A6-5662	1.24109589	0	1.158716	0.03065611	0.1567432	0.525506	0.1728862	0.05546573	0.2399481	1.085615	0.7622717	1.737306	1.1021017	low
TCGA-RU-A8FL	3.224657534	0	0	0	0.1542229	0.02158399	0	0.2171819	0.1264768	1.51765	0.7458134	0.9157349	1.236505304	low
TCGA-AA-3972	4.249315068	0	0.07544176	0.07451587	0.1269987	0.1327115	0.08404697	0	0	0	0.3996355	1.094819	0.927262076	low
TCGA-AA-3858	2.589041096	0	0.046770198	0.13858857	0.212579003	0.185117978	0.039078754	0.519403792	0	0.160036801	0.382893216	0.363607568	1.250480114	low
TCGA-AU-6004	2.257534247	0	0.009776091	0.405556599	0.385095536	0.13542931	0.147031109	0.351909504	0.170053271	0.089204059	0.442540099	0.881631154	1.809232326	high
TCGA-DM-A28A	2.205479452	1	0.02050003	0.2126086	0.1759998	0.04733154	0.1712876	0.09420493	0.1188647	0.07014636	1.016837	1.466243	1.0669354	low
TCGA-AA-3848	0.838356164	1	0	0.60918805	0.17304162	0.02260321	0	0.23618501	0.39734744	0	0.5280213	1.38518881	2.40207677	high
TCGA-AA-3811	0.838356164	1	0.04986261	0.147752	0.2518162	0.1151254	0	0.9738299	0	0.1137456	0.7203704	1.162947	1.684640415	high
TCGA-CA-5256	0.178082192	0	0	0	0.1275286	0	0.03516568	0.04835114	0.2440316	0.2400197	0.5877669	0.7198367	1.147647728	low
TCGA-CM-5341	0.747945205	0	0.1049968	0.2488996	1.760446	0.04155807	0.1403678	0.192999	0.4870398	0.5748395	0.7281116	2.024377	2.742284648	high
TCGA-AA-3947	2.750684932	0	0	0.1462526	0.5982262	0.162796	0.1649594	0.5292264	1.144733	0.5629566	0.02376868	2.916237	8.163593987	high
TCGA-CM-6162	0.580821918	0	0.507913582	0.399296314	0.513013116	0.246163912	0.242506437	0.222289875	0.36061476	0.993121601	0.25457952	0.773621773	2.580978276	high
TCGA-CA-6719	1.191780822	0	0.1452979	0.3643064	0.2257795	0.117968	0.1867744	0.1027224	0.06480588	0.07648857	0.355238	0.4170814	1.356163613	low
TCGA-AA-A00O	2.252054795	0	0.04460341	0.264336	0.3829355	0.08827088	0.0372683	0.1024843	0.387934	0.559616	0.128878	1.178992	2.207418145	high
TCGA-AZ-4615	2.745205479	0	0	0.17131753	0.369840606	0.025426143	0.03220504	0.265682383	0.111743135	0.26377461	0.658931453	0.719162925	1.27035967	low
TCGA-AA-A01V	0.084931507	0	0.021447514	0.190658608	0.194965655	0.070741637	0.035840862	0.032852987	0	0.097851243	0.299525982	1.067138135	1.120267821	low
TCGA-AA-A00D	1.583561644	0	0.106101	3.851357	0.4554566	0.0524939	0	0.4063099	0	0.1815265	0.5237245	0.9073521	14.84544667	high
TCGA-AA-3522	3.087671233	0	0.422940899	1.253250498	0.142395764	0.077500646	0	0.089979813	0.681201639	0.375201538	0.463927991	0.657617533	4.493856471	high
TCGA-AA-3877	2.583561644	0	0	0.273768789	0.676553867	0.030473608	0.154392863	0.583777812	0.669628989	0.790344419	0.344815655	1.580200218	4.736912535	high
TCGA-D5-6923	1.035616438	0	0.01572651	0.3262036	0.2620928	0.1971125	0.07884156	0.5119049	0.04559329	0.0179375	0.6513141	1.247086	1.413849391	low
TCGA-AZ-6599	0.564383562	1	0.1991052	4.164599	0.08280765	0	0.019572	0.01794038	0	0.3740427	0.3553316	0.546322	15.18098505	high
TCGA-4T-AA8H	0.956164384	0	0.232989975	0.197254715	0.067236923	0.010978357	0.055621242	0.229429684	0	0.037963705	0.577033778	1.29381715	1.249441195	low
TCGA-AA-3979	2	0	0.2690565	0.06643861	0.09058597	0.04437228	0.03746828	0.2919303	0	0.1534415	0.4103037	1.255043	1.28152754	low
TCGA-A6-A565	1.353424658	1	0.136579385	0.452322336	0.819589238	0.264992982	0.228237311	0.879913887	0.279502684	0.329889222	0.45653889	1.773855648	3.499097054	high
TCGA-A6-5667	0.876712329	0	0	0.1246613	0.09560812	0.09019555	0.0351516	0.2899907	0.1829504	0.07197709	0.6787002	0.4578944	1.158728507	low
TCGA-AA-3842	3.084931507	0	0.6767997	0	0.07195735	0.09399282	0	0.1091276	0	0	0.1372322	0.7754044	1.14440586	low
TCGA-AA-3870	2.498630137	0	0.5498003	0.4072894	0.1619684	0.07555998	0.0765641	0.03509066	0.1328288	0	0.7612062	1.211062	1.301737093	low
TCGA-AA-3511	0.580821918	0	0.06628206	0.08417389	0.08607541	0.1124342	0.1582339	0.1450427	0.2196122	0.06480054	0.533511	0.9717076	1.279016368	low
TCGA-CM-6167	0.334246575	0	0.1632765	0.03721676	0.685035	0.3728387	0.2308737	0.5386867	0.8010719	0.6876239	0.108871	1.327954	3.842199665	high
TCGA-CM-5348	1.076712329	0	0.040027782	0.652352628	0.293115087	0.290457334	0.08361285	0.084306706	0.406160865	0.182621082	0.35179036	1.680424438	2.176186103	high
TCGA-AA-3952	0.167123288	1	0.079338797	0.058773807	0.320541484	0.07850639	0.165728467	0.470928762	0.230013918	0.316725514	0.324761154	2.035463197	2.243531146	high
TCGA-AA-3532	2.416438356	0	0.492586624	0.425723492	0.414610228	0.121854626	0.102894963	0.267231838	0.119006279	0.327739513	1.077351478	0.702081863	1.276233009	low
TCGA-AA-3530	1.589041096	0	0	0.3035432	0.3880004	0.1351514	0	0.05884255	0.1484912	0.5257802	0.3576513	1.67242	1.491057891	low
TCGA-NH-A5IV	0.003	0	0.352729063	1.451666818	0.366166923	0.161587175	0.147361062	0.682885733	0.284058147	0.223510605	0.259514109	1.218771895	6.183576665	high
TCGA-CK-4947	1.463013699	0	0.217502418	0.276213885	0.188302438	0.06149155	0.017307976	0.245908982	0.300270938	0.023626761	0.548652068	0.515333616	1.595164407	high
TCGA-AY-A54L	1.438356164	0	0.8522734	0.02902805	0.1682082	0	0.04911141	0.06002298	0.05680129	0.04469399	0.5708271	0.7615938	1.116373532	low
TCGA-A6-2671	1.775342466	0	0.63694381	0.22877332	0.17545605	0.06366274	0.03225438	0.11826196	0	1.45298294	1.37565154	0.84030881	0.906656136	low
TCGA-AA-3516	1.084931507	1	0	2.321758	0.239819	0.03132586	0.03967769	1.127469	0	0.2166528	0.2629858	1.69823	11.6663584	high
TCGA-G4-6628	4.4	0	1.067217	0.3040729	0.507872	0.06092425	0.06859319	1.037436	0.1785004	0.2340879	0.3162708	1.436004	4.049677458	high
TCGA-AD-6964	0.906849315	1	0.3795878	0.6846532	0.6501112	0.2504035	0.1930563	0.1769621	0.1913872	0.1129445	0.2702233	1.334386	2.288423428	high
TCGA-AA-3680	0.917808219	1	0.665206374	0.627176769	0.610804685	0.07978511	0	0.138948184	0	1.310529235	0.276660312	0.376112189	2.000563706	high
TCGA-AA-3514	0.084931507	0	0.6647233	0.4595957	0.02237991	0.1023165	0	0.0678809	0.1284749	0.3538157	0.5228478	0.7579421	1.448408396	low
TCGA-QG-A5YW	2.454794521	0	0.450152177	0.538683295	0.253566953	0.182740213	0.202528216	1.379072981	0	0.315962386	0.075039176	0.996050668	4.634759881	high
TCGA-AA-3673	4.169863014	0	0.01758077	0.41676	0.2841165	0.08118279	0.1468958	0.0673249	0.2038761	0.320839	0.5757133	0.6013872	1.484608973	low
TCGA-F4-6463	1.136986301	0	0.01175273	0.2786037	0.4985706	0.1628119	0.05891983	0.06300931	0.06814551	2.895489	0.311287	1.059889	1.804854689	high
TCGA-AA-3666	0.167123288	1	0.769148559	0	0.277453905	0.144967391	0.091808668	0.084155033	0.318552264	0	0.687883803	1.025078538	1.270360105	low
TCGA-D5-6898	0.62739726	0	0.009044437	0.08040091	0.2740573	0.1193273	0.1057989	0.2424474	0.1573263	0.02063198	0.4791084	0.478139	1.20965531	low
TCGA-AA-3489	0.58630137	1	0.017981064	0.932420146	0.926241458	0.290609374	0.480769457	0.502662128	0.886202202	0.143563102	0.290081308	1.789324347	8.169248293	high
TCGA-AA-A01S	0.084931507	0	0	0.4406242	0.0214561	0.05605318	0	0.01626972	0	0.4361281	0.3785066	0.8587746	1.239293026	low
TCGA-T9-A92H	0.991780822	0	1.10381033	0.390094216	0.235252601	0.03340151	0	0.209411064	0.058717351	0.277209809	0.91194596	0.944741312	1.384183047	low
TCGA-AA-3662	0.504109589	0	0.02268338	0.1344299	0.4238558	0.1197088	0.07581223	0.1737303	0.3945732	1.164259	1.299913	1.728214	1.349350012	low
TCGA-A6-2678	1.197260274	0	0.115993259	0.05728484	0.331947242	0.114776281	0.032305985	0.05922559	0.448373559	0.132300702	0.46549074	0.721417118	1.467425378	low
TCGA-AY-4071	0.079452055	1	0.06760038	0.1335414	0.3869149	0.08918817	0.1129667	0.05177463	0.2613102	0.2056114	0.5642749	1.611682	1.434943026	low
TCGA-CA-5797	0.273972603	0	0.01918045	0.0852527	0.1743572	0.1265281	0.01602619	0.1101762	0.1112134	0.04375403	0.1847346	0.6859307	1.174970451	low
TCGA-AM-5820	0.038356164	0	0	0.09234732	0.07344826	0.04797014	0.1215191	0.1432139	0.1204685	0.04739519	0.3501889	0.3876589	1.215880686	low
TCGA-CK-6746	0.003	0	1.058421	0.9722511	0.3314049	0.05585688	0	0.7538925	0.06137013	0.5794677	0.1529112	0.2962271	4.249236262	high
TCGA-CM-4746	1.915068493	0	0.2489381	0.4023539	0	0	0	0.121329	0	1.135745	0.2724572	1.337137	1.749083164	high
TCGA-A6-6137	0.953424658	0	0	0.290667907	0.286225526	0.100658984	0.05464106	0.066781207	0.252787075	0.22376815	0.509128779	0.847344619	1.407553219	low
TCGA-CM-6165	0.580821918	0	0	0.1849496	0.2647788	0.1070525	0.06258179	0.1051685	0.4342851	0.2562873	0.5831181	0.5822911	1.525721763	high
TCGA-AA-3520	2.002739726	0	0.6677977	0	0.1860697	0.3190027	0.1154436	0.176366	0.2670395	0.6303585	0.7651659	1.5038	1.198880451	low
TCGA-G4-6625	7.649315068	0	0.3714441	0.03335321	0.5798135	0.1633542	0.05642898	0.1120704	0.1957939	0.1540601	0.677562	0.8050651	1.088489236	low
TCGA-DM-A28M	7.931506849	0	0.461996	0.09441226	0.04022711	0.005254584	0.09317721	0.02440271	0.04618582	0	0.2493349	0.9412771	1.26841655	low
TCGA-D5-6920	1.032876712	0	0.027708672	0.054737211	0.298526634	0.121857593	0.108042343	0.290032205	0.214216519	0.021069482	0.653839779	0.746777987	1.23872348	low
TCGA-AA-A02O	0.076712329	0	0.01933481	0.4010478	0.0585868	0	0	0.04442517	0.1121085	0.6174863	0.139666	1.503154	1.835835077	high
TCGA-AA-3710	2.249315068	0	0.05599098	1.16137989	0.36759539	0.12927491	0	1.47946624	0	0.44703908	0.39097195	1.74117232	6.283908748	high
TCGA-AZ-4614	0.471232877	1	0.9171867	0.4135768	0.02013903	0.3419806	0	0.1527101	0	0.2729044	0.4416897	1.302096	1.206566593	low
TCGA-G4-6320	2.202739726	0	0	0.4045725	0.4275023	0.03602685	0	0.4810208	0.1583312	0.2491653	0.3156014	1.18883	2.242507445	high
TCGA-AA-3856	0.082191781	0	0.01776794	0.2632482	0.3948194	0.1172102	0.02969195	0.1496917	0.1030234	0.1621275	0.4706081	0.8288045	1.250400914	low
TCGA-A6-6138	0.767123288	0	0.03291404	0.1300404	0.421097	0.1736998	0.1100051	0.07562587	0.06361484	0.2502761	0.4490952	0.7847142	1.05965135	low
TCGA-DM-A1D8	1.049315068	1	0.02207131	0.08720173	0.1114646	0.1698647	0.02458886	0.09015603	0.04265848	0.1846116	0.368468	1.143933	1.012405836	low
TCGA-AM-5821	0.076712329	0	0.0238519	1.554905	1.047975	0.1416099	0.2989412	0.4018959	0.1382998	3.264627	0.8270181	1.40929	5.978287098	high
TCGA-CK-5916	1.761643836	1	0.01265645	1.162604	1.112166	0.08349106	0.1269009	0.2132566	0.2935421	0.05774325	0.3230333	0.5903734	3.517081834	high
TCGA-WS-AB45	5.835616438	0	0.174230423	0.309765782	0.83590369	0.563181276	0.888025259	0.487062573	0.252558797	0.238470483	0.104880209	1.760885215	3.065980679	high
TCGA-AA-A00Z	1.832876712	0	0.3425798	0.3383753	0.2998834	0.1506602	0	0.1224437	0	0.2083962	0.373946	1.065333	1.251666167	low
TCGA-AA-3833	1.328767123	0	0	1.177698184	0.200717135	0.262182645	0.249062625	0.30439934	0	0.169995125	0.610078243	1.081452757	2.122807189	high
TCGA-CA-6715	1.049315068	0	0	0.02690715	0.09171663	0.05391134	0.09104628	0.02781873	0.05265116	0.3521419	1.062613	0.9318523	0.750239296	low
TCGA-NH-A6GA	0.82739726	1	0.008675492	0.7712116	0.2015397	0.5265142	0.0869855	0.1860459	0.2012114	0.07916141	0.4804537	1.348925	1.446770415	low
TCGA-AD-6889	5.632876712	0	0	0.1987141	0.09031251	0.03686527	0.01867759	0.1027232	0	1.121841	0.4898016	1.77261	1.343555175	low
TCGA-AZ-5407	5.117808219	0	0.0271116	0.1205049	0.1779947	0.06259668	0	0.2387926	0.393001	0.4329249	0.3786279	0.3372398	1.707376647	high
TCGA-D5-6540	1.345205479	0	0.022366328	0.762168046	0.293681567	0.132789991	0.205569592	0.813684809	0	0.051021601	0.527776824	1.460621486	2.805702105	high
TCGA-AA-3548	2.832876712	0	0	0	0.400795387	0.104706152	0.132621995	0.202609925	0.460163925	0	0.471361468	0.575856865	1.615786571	high
TCGA-A6-6649	0.898630137	0	0.1232891	0.981819	0.3813638	0.2287417	0.0772605	0.2360656	0.2680739	1.124978	0.8720315	1.006417	2.253605438	high
TCGA-G4-6297	6.865753425	0	0.5498127	0.3324887	0.2039998	0.3256863	0.206259	0.1289074	0.06506047	0.3071562	1.080708	0.8025465	0.897653895	low
TCGA-5M-AAT6	0.794520548	1	0.03124575	0.7406945	1.025682	0.1752016	0.5743612	0.8974084	0.3623426	0.4276629	0.4589341	1.894738	6.345208336	high
TCGA-DM-A1DB	3.693150685	1	0	0.04170204	0.120825	0.06498683	0.1411081	0.7383421	0	0.2889356	0.5828505	1.881877	1.749580154	high
TCGA-AA-3660	6.506849315	0	0.02323652	0	0.129084	0.04598545	0	0.3648319	0.2694632	0.2385299	0.6266407	1.156151	1.447266413	low
TCGA-DM-A0XF	3.183561644	1	0	0.1148133	0.08609848	0.05623218	0.07769926	0.07122186	0	0.03535522	0.459017	1.759182	1.108558252	low
