# Supplementary material for: A Novel Prognostic Chemokine-Related lncRNAs Signature Associated with Immune Landscape in Colon Adenocarcinoma
Source: Dis Markers. 2022 Nov 3;2022:2823042. doi: 10.1155/2022/2823042 (PMC9649319; doi:10.1155/2022/2823042)
Supplement: Supplementary Materials — Supplementary Figure S1: (A) Heatmap of the expression of prognostic chemokine-related lncRNAs between tumor tissues and normal tissues. (B) Boxplot of the expression of prognostic chemokine-related prognostic lncRNAs in COAD tissues and normal tissues. (C) Barplot showed the proportion of 22 kinds of TIICs in each COAD sample. (D) Correlation between 22 kinds of TIICs was visualized. ∗p < 0.05; ∗∗p < 0.01; ∗∗∗p < 0.001. Supplementary Figure S2: Survival analysis was conducted in high-risk and low-risk patients with different clinical parameters. Supplementary Figure S3: Risk stratification showed the differences in drug susceptibility between high-risk and low-risk groups. Supplementary Table S1: Clinical information of the COAD patients. Supplementary Table S2: The 64 chemokine genes. Supplementary Table S3: Expression of 52 chemokine-related lncRNAs in COAD. Supplementary Table S4: Immune cell content of COAD samples was calculated using the CIBERSORT algorithm. Supplementary Table S5: Immune, Stromal, and ESTIMATE scores for COAD samples. Supplementary Table S6: Expression of 10 chemokine-related lncRNAs and risk score in the entire cohort. Supplementary Table S7: The immune cell infiltration status in all tumor samples in RNA-seq. Supplementary Table S8: Tumor mutation burden data of the low-risk group. Supplementary Table S9: Tumor mutation burden data of the high-risk group. Supplementary Table S10. The immunotherapy score data was obtained from the TCIA database. Supplementary Table S11: Quantitative real-time PCR primer sequences of model lncRNAs. Supplementary Table S12: The correlation values of immune cell infiltration and patient risk score. Supplementary Table S13: The correlation values of chemokine-related lncRNAs and immune cells. [file 2823042.f1.zip › Supplementary Table 7 (1).txt]

cell_type,B cell_TIMER,T cell CD4+_TIMER,T cell CD8+_TIMER,Neutrophil_TIMER,Macrophage_TIMER,Myeloid dendritic cell_TIMER,B cell naive_CIBERSORT,B cell memory_CIBERSORT,B cell plasma_CIBERSORT,T cell CD8+_CIBERSORT,T cell CD4+ naive_CIBERSORT,T cell CD4+ memory resting_CIBERSORT,T cell CD4+ memory activated_CIBERSORT,T cell follicular helper_CIBERSORT,T cell regulatory (Tregs)_CIBERSORT,T cell ga…
TCGA-OR-A5J1-01,0.10825659897006,0.11702440105425,0.201176366586398,0.11259544057878,0.0536604459352498,0.493232283228907,0.0029373088206278,0.00228257173010433,0,0.112941117133302,0,0.208749660768029,0,0.0201536321045871,0.0498026656691441,0,0.00623861069019448,0.0423236073663891,0.0983073779934503,0,0,0.379331427065951,0,0.0141508629628002,0.0610774311733168,0,0.00170372652210366,0,0.0005519513…
TCGA-OR-A5J2-01,0.114474694292325,0.106788230720163,0.213193017125092,0.112099046206495,0.0659092020589872,0.49054752313117,0.0463802907976036,0,0.151495204055632,0.0735190377799121,0,0.0835329844967111,0,0.0573361993915214,0,0,0,0.0468549147738652,0.0221877572729679,0.0441248660052828,0.0201711431621239,0.413936379142649,0,0.0308199129337631,0,0.0096413101879684,0,0,0.0135544388298052,0,0.044273…
TCGA-OR-A5J3-01,0.102440901513901,0.105614844815644,0.202602366948557,0.108903575901025,0.0473588917143331,0.470323658822622,0.0610348745304148,0,0.190537616062825,0.0164945327908085,0.0607173163690066,0.138748228775299,0,0,0,0,0.00682599654402694,0.070830489025141,0.0360031339520444,0,0,0.219405538128663,0,0.15191142257008,0.0474908512516912,0,0,0,0.00728293506289774,0,0.0227357407629861,0.00196…
TCGA-OR-A5J5-01,0.102013331774944,0.111165877597728,0.196239080677345,0.107726110704862,0.0501908917189668,0.470978806360032,0.253704389810328,0,0.0396446949128339,0.0373471743521868,0,0.146511521487652,0,0.0111619968670559,0.000778040273527457,0,0.0484544008421466,0.0217944204272078,0.0785835744835366,0.211280949276753,0.007589552762671,0.103569215571829,0,0,0.0395800689322722,0,0,0,0.0256996849…
TCGA-OR-A5J6-01,0.158062013188855,0.0931031519767781,0.248908310106738,0.103336722390625,0.126931893886839,0.472417896996506,0.00580568600359582,0,0.00641966127820587,0.0398617660974766,0,0.0915359091787475,0,0.00278919922364009,0.0013283356166335,0,0.00148120590773582,0.0304839082076406,0.0946417792873206,0,0,0.648498923839878,0.00626047342378013,0.00347921740629432,0.0674139345290515,0,0,0,0.00…
TCGA-OR-A5J7-01,0.192017385942079,0.0959520302187194,0.275774396386787,0.0893666251331156,0.0712390466319579,0.460850387178749,0.0529828377590554,0,0.0949267650607863,0.00442663729062006,0,0.107660114044787,0,0.039621764025784,0,0,0,0.0649952050002194,0.0973007489424286,0,0,0.1731154200896,0,0.3052265535577,0,0.0597439542290187,0,0,0.00390138780412043,0,0.00698992615640828,0.000325955148295887,0,…
TCGA-OR-A5J8-01,0.145984388761258,0.136565076928073,0.318242527864651,0.142195814682495,0.276121530191679,0.534854301498175,0,0,0.00479818049708167,0.107930360176998,0,0.0364491939658871,0,0.0477767030311741,0.00216156037051817,0,0,0.0206729218292267,0.00332763517242682,0,0.0871169686669187,0.673371560092348,0,0,0,0.0163949161974212,0,0,0,0,0.00523934889061116,0.117854010119159,0,0.03980051273289…
TCGA-OR-A5J9-01,0.100031706174812,0.111587726836145,0.21152665206537,0.112044714905125,0.0510700902342663,0.468293362665143,0.0521823523807155,0,0.0663325856452734,0.120758479872176,0.00148665752047705,0,0,0,0,0,0.0198157503673029,0.0501166638931941,0.29913137251244,0,0.00193804987723447,0.335804287995325,0,0,0,0.052433799935862,0,0,0.00658691510102061,0,0.00837308189728267,0.0152431965665903,0.0…
TCGA-OR-A5JA-01,0.100950347527696,0.109788193258895,0.200495082433859,0.112067827802169,0.0698708675292988,0.459774897520254,0.00183440072262703,0,0.0130263325236329,0.0747818445472794,0,0.399322199610808,0,0.0220684331760798,0,0,0,0.0605206766743546,0.0837886563515399,0.142221435026508,0,0.0462459530343398,0,0.0382990154025002,0.104932817123737,0,0.00103799541810279,0.0119202403884903,0.00031153…
TCGA-OR-A5JB-01,0.126648182631879,0.083687166344917,0.327212676471586,0.138238660452003,0.0981864468595346,0.630660783957961,0,0.0314466025694514,0.0434066351756698,0.168949200508615,0,0.0401244607313625,0.0330473394536544,0.0474411033249793,0.0222782413391251,0.0226718597078313,0,0.0586092537201134,0.00184159958462594,0,0.133487537316757,0.28921056678811,0.0110983926611379,0,0,0.0963872071185657…
TCGA-OR-A5JC-01,0.101161360034756,0.110301778545714,0.201627404675217,0.112882977043047,0.0629292700322555,0.464609463714802,0.0270247716916015,0,0,0.0797362841483901,0,0.173147513036923,0,0,0,0,0.00552281824112937,0.0350567806870004,0.0598912618621117,0,0.0261611169404551,0.529501733394904,0,0.0053718320755625,0.0585858879219227,0,0,0,0.00407913915317057,0,0,0.0120354540756069,0,0.02613501448830…
TCGA-OR-A5JD-01,0.121638916720913,0.0881281603151409,0.22186198779354,0.111474340498314,0.0722048857173453,0.486410894691806,0.0345510699241669,0,0.00538034901104021,0.106342142984526,0,0.0974244738290725,0,0.0592549161347601,0,0.0208591703058744,0,0.103503260450379,0.0988397284790493,0,0.00310345459852335,0.354761558980603,0,0.0107101710714327,0,0.105269704230573,0,0,0.00887131149654774,0,0.0013…
TCGA-OR-A5JE-01,0.131335016270424,0.107906557016292,0.223697733317462,0.106016028051943,0.0753096248034991,0.467012994161036,0.00815755775844309,0,0.0238258335492465,0.0318693463935774,0,0.0835032282746697,0,0.0362373883087916,0.0110908407399127,0,0,0.0733144605139971,0.0909803652502012,0,0,0.387418447798937,0,0.203422017429484,0,0.0205750735064525,0.0296054404762871,0,0.00101855809143532,0,0.002…
TCGA-OR-A5JF-01,0.105845931534123,0.0987063165017,0.212182600869554,0.108649304916177,0.0612506403132769,0.458978010522348,0.0874554075471566,0,0.141038621919522,0.0665877245429851,0.0846310331480331,0.0702395480789717,0,0,0,0,0,0.0755267830704977,0.0057405537781979,0,0.00172110848704102,0.333660602616702,0,0.0635725663018101,0,0.0698260505090835,0,0,0.0100145070229823,0,0.0161503137351821,0.0076…
TCGA-OR-A5JG-01,0.103130040300926,0.0956503474195928,0.208821850303282,0.106198309444171,0.0643258359928802,0.466903849769748,0,0.0287196287697109,0.017864489849412,0.0438884509230488,0.0387635507726119,0.29032649909852,0,0,0,0,0.0237424312115875,0.0642099377433381,0.0517929866614902,0,0.0102203261028545,0.368803842400073,0,0.0147253088278755,0,0.0450477483330947,0.00189479930638335,0,0,0.0028572…
TCGA-OR-A5JI-01,0.124673434971834,0.107127885499343,0.209226210127443,0.105533100012278,0.0696338636428778,0.471615296365319,0.00282812524570621,0.00507559027433574,0,0.164419373854943,0,0.240370605813619,0,0.0466865760876101,0.0196082927649876,0.0231433547797651,0,0.015800554416258,0.047550378949998,0,0.0187357070911453,0.347951005923852,0.000631341749643953,0.00185577039148133,0.065343322656654…
TCGA-OR-A5JJ-01,0.103042007886575,0.105150217226004,0.21484101412213,0.108417747050957,0.0537964238997467,0.472397206731386,0.115232456746527,0,0.132170571360676,0.232400098579041,0,0.0885395910238936,0,0.0757849564563719,0,0.00301686807168926,0,0.0789335508314546,0.000227394257591972,0,0.0380806628429924,0.205546052376489,0,0.0294604316991251,0.000607365754148119,0,0,0,0.0316205688337927,0,0.036…
TCGA-OR-A5JK-01,0.150390481901241,0.115074431720601,0.222221977395667,0.108380111715352,0.0555067358491991,0.548286345056646,0.0120952215049954,0,0.0358447028652955,0.345919464532895,0,0,0,0.1048567051391,0.0330055943749186,0.0190765372187449,0,0.0467145500056374,0.0529837526282288,0,0.0681015085200585,0.276689076999719,0,0,0,0.00471288621040668,0,0,0.00529576388112451,0,0.0156942212827829,0.1514…
TCGA-OR-A5JL-01,0.107331770704085,0.0982310994312194,0.225034934625524,0.1110609517721,0.0846071256019875,0.465177682994542,0.0168627953048614,0,0.0814749607994197,0.0290729338224377,0,0.144021991362136,0,0,0,0,0.0242053394923185,0.0382362272324826,0.136163854283078,0,0.00870184006209682,0.516535602544672,0,0.00325078202531079,0,0,0.00147367307118662,0,0.00371002715300964,0,0.0179255165820047,0.0…
TCGA-OR-A5JM-01,0.113236049686935,0.111241852345472,0.201982289764636,0.109566828253152,0.0575849062571257,0.463266350183163,0,0.0698801426530161,0.0786358361252726,0.0299992947068396,0.0890143504175133,0.063306590708104,0,0.0078478004191862,0.013590868313316,0,0.0212687234312849,0,0.0954636036722253,0.467590395057354,0,0.00156567014120648,0,0,0,0,0.0618367243546817,0,0,0.00475625651495219,0.0053…
TCGA-OR-A5JO-01,0.139914884829864,0.0920335376305289,0.309180750114789,0.107863667231209,0.2082590955129,0.561782451205168,0.00576549820248401,0,0,0.100590223870798,0,0.214965401276761,0,0,0,0,0,0.0689369099653613,0.0334272762408961,0,0.029705104552913,0.386197956578712,0.000357568665990321,0,0.160054060646084,0,0,0,0.00484368692473376,0,0,0.0845074501816871,0,0.180595859519268,0,0,0,0,0,0.057914…
TCGA-OR-A5JP-01,0.1044035064384,0.104395064120408,0.214402373005332,0.116695263725402,0.0672108244773319,0.451717340143132,0.0637591218724312,0,0.0511386254237487,0.0145998447879309,0,0.17924996685223,0,0,0,0,0.0425711490557918,0.0266776950074946,0.0380062789340244,0.0798500984177811,0.0192492519670112,0.379605840153058,0,0.083729045502254,0,0.0215630820262441,0,0,0.00797767662897245,0,0.00639857…
TCGA-OR-A5JQ-01,0.131228432107484,0.129999055940689,0.232819029304968,0.107946940122753,0.0822306069873957,0.506527607858416,0.00072845507799297,0.00186999300168899,0.0426598388367731,0.146048676089082,0,0.291263013062396,0,0.0181035009074536,0.00852829247999819,0.0215135525321196,0,0.0549635604653846,0.0663477031679537,0,0.0577448356619612,0.246472582399873,0,0.00670517662380422,0.03705081969351…
TCGA-OR-A5JR-01,0.127795673514211,0.098712674420908,0.228057449276998,0.102918246665809,0.0971094695303972,0.490971469174508,0.00251117427224683,0,0.00257668938019397,0.104532384181205,0,0.201309455864094,0,0.00229832528284334,0,0,0,0.0831398369271774,0.07462701526101,0,0.00450734716545374,0.449246296103808,0,0.00848264734267847,0,0.0667688282192885,0,0,0.000601104960021233,0,0.000616787446409609…
TCGA-OR-A5JS-01,0.0946230018470334,0.103607731748064,0.201244824944415,0.113403860196497,0.0679082293912675,0.475943556897747,0.103855613984015,0,0.283503214933011,0.0967679017298744,0,0.0101808572494004,0,0.063812257089855,0,0,0,0.0844212469218134,0.0676104135352107,0,0,0.112210485077348,0,0.172537654830249,0,0.00510035464922259,0,0,0.0123994728860946,0,0.0338478613897902,0.0115532606059073,0,0.…
TCGA-OR-A5JT-01,0.111607199675092,0.105930045100569,0.21775029164466,0.114901898778599,0.105172031971891,0.458872519173977,0,0.00453849616900274,0,0.0631762288895452,0,0.254638069104103,0,0,0,0,0,0.083027913806772,0.0436007521669247,0,0.00270324680906258,0.374397505669477,0,0.121694471606496,0.0522233157786167,0,0,0,0,0.000645640056350455,0,0.00898736111288113,0,0.0362244521452288,0,0,0,0,0,0.011…
TCGA-OR-A5JV-01,0.126891590709223,0.148113953003885,0.188263101028722,0.145665103663223,0.17822210932299,0.4769586379129,0.0221019761349723,0,0.00269984562741995,0.0341521218291411,0,0.167783289543093,0,0,0,0,0,0.0380496163380061,0.174369244651042,0,0.0232998278079635,0.478500522702566,0,0.00343092130385412,0,0.0527025935472894,0.00291004051465293,0,0.00945498635994022,0,0.00115496476085721,0.014…
TCGA-OR-A5JW-01,0.110996037291877,0.102768153070437,0.20319535388602,0.109826478559215,0.065945126916516,0.471317779720036,0.0489815572224874,0,0,0.0223852333261069,0,0.341279050335611,0,0,0,0,0,0,0.0982022765607589,0,0.00624520982205259,0.439215381849945,0,0.028185536374001,0.00311307273593358,0.00533477732360953,0,0.00705790444949398,0.0058888215662696,0,0,0.00269127100590088,0,0.04103037032088…
TCGA-OR-A5JX-01,0.0994892660025617,0.120382368929871,0.194650860129043,0.112387973049442,0.0547700575543116,0.47424139965459,0.0364856745729147,0,0.0652832827068415,0.0601451458180554,0,0.098838598338778,0,0.0352618912668451,0.0370283385141765,0,0.0296091199742856,0.0897284598917639,0.106940706680691,0,0.00933118903063631,0.343816401356677,0,0.0136604516929216,0.0738707401554132,0,0,0,0.004841710…
TCGA-OR-A5JY-01,0.10808475224841,0.0937410257291221,0.223496086833317,0.124593684244863,0.075957914922281,0.485918058892594,0.0647313237806778,0,0.0208663589931545,0,0,0.164093439604026,0,0.0201619588325229,0.055444854307851,0,0.0192816201978839,0.0331941262674664,0.166287797178013,0,0,0.225541472044291,0,0.204682345236407,0.0103354434382436,0,0,0.0153792601194624,0.0167844022578542,0,0.005410508…
TCGA-OR-A5JZ-01,0.117570776206801,0.107529207550747,0.226375130051167,0.112722930904965,0.10160043338827,0.457664601625581,0.0358320598710273,0,0.0523577461832372,0.128550272155727,0,0.177537519207315,0,0,0,0,0,0.075695921423408,0.023869632009689,0,0.00484983778459719,0.434750074423433,0,0.0227976413647258,0.0405798851897106,0,0,0.00317941038713024,0.0072363261074415,0,0.010573707651647,0.0259608…
TCGA-OR-A5K0-01,0.223655193054901,0.05536922492252,0.242840993558725,0.0867798610151213,0.0183974986397796,0.581912594358199,0.12329361453654,0,0.0585212098671749,0.107069853064826,0,0,0,0.0794063855376634,0,0,0,0.0793556833050615,0.0143162940117221,0,0,0.31242651873498,0,0.164033535192892,0,0.0540386179924958,0,0.00753828775664555,0.0121046414651,0,0.00574545783420186,0.0105118354096639,0,0,0,0.…
TCGA-OR-A5K1-01,0.11427655580097,0.109776890769263,0.241692918690982,0.0986665736665546,0.0474593481907851,0.519832150713825,0.0184867486259295,0,0,0.0447890712537966,0,0.333041410218041,0,0.0175991674310558,8.47525963762668e-05,0,0.00328618361279747,0.103133231239985,0.0721548215120225,0,0.0251336014976057,0.311933830600585,0,0.0234117031836929,0.0469454782281122,0,0,0,0.00293214297610924,0,0,0.…
TCGA-OR-A5K2-01,0.114881999879422,0.0990978396317107,0.207320726939847,0.110437829093558,0.0600238883498945,0.479024620396046,0.000917135948374389,0.00435985981146378,0.0264819421038668,0.0451596102366854,0,0.14185982676512,0,0.0394640130529796,0,0,0,0.0953863337929828,0.0873534627031261,0,0,0.314766342821899,0,0.0995185236261923,0,0.129741290357591,0.0149916587797191,0,0.000110949963222788,0.000…
TCGA-OR-A5K3-01,0.105459544545007,0.101473806137885,0.200213885327662,0.108498135013765,0.058895600454205,0.476603495872512,0.00351252674217587,0,0.0188002010279368,0.0324208408690388,0,0.227920066839145,0,0,0,0,0.00266894587060112,0.00720303284616884,0.0158172165659942,0,0.000123224192292802,0.536436632191146,0,0.120415488661511,0.0323898349671801,0,0.00229198922680986,0,0.000362656738832518,0,0…
TCGA-OR-A5K4-01,0.103872268595646,0.102999895610185,0.209417146763607,0.1117626741727,0.0801295137591143,0.458956460213013,0,0,0.0866452950337647,0.0769407797767773,0,0.237079288641699,0,0,0,0,0.0681184176981011,0.0209565267715284,0.0646942673907712,0,0.0394708255380805,0.321850227021247,0,0.0438066857840382,0.0404376863439926,0,0,0,0,0,0.00924117770679736,0.00820613997032016,0,0.0252857565559131…
TCGA-OR-A5K5-01,0.104163438125742,0.0970848544739583,0.216887109597176,0.114039772390128,0.0516166058328597,0.470377012233297,0,0,0.0886438517410843,0.0208249049606195,0.000760263024184714,0.0613111714672832,0,0.0682624155937607,0.0437054628206018,0,0.166777751266271,0.0443361204654173,0.102723801808052,0.0480231789086636,0,0.113821585807567,0,0.233256388700459,0,0,0.007553103436036,0,0,0,0.01088…
TCGA-OR-A5K6-01,0.110896257709858,0.0962303872837078,0.204172930758053,0.118851444987043,0.0587301952719082,0.490760340935954,0,0.0094428333897711,0.000509269005106878,0,0,0.159930120664823,0,0.0163635761129737,0,0,0.0217960698449683,0.058189344314425,0.183394091078674,0,0,0.329783286952363,0,0.044862163429129,0,0.155064868591013,0.0206643766167532,0,0,0.00153556975088512,8.28160412268417e-05,0,0…
TCGA-OR-A5K8-01,0.101470459765691,0.103343628454494,0.205018292158825,0.108556630455054,0.05027093306814,0.466597340220813,0.00267537398533015,0,0.00879230585569557,0.255106253735815,0,0.160224609956625,0,0,0,0,0.0604702360463254,0.0236674148052739,0.0580359846357068,0,0.000497767289749141,0.339486422280835,0,0.00828364916732242,0.0827599822413219,0,0,0,0.000194800429475496,0,0.000640188985226325…
TCGA-OR-A5K9-01,0.106431998533326,0.102310394573812,0.208232371315294,0.107673130395708,0.0508064463724643,0.469048181126811,0,0,0.0416277512137128,0,0,0.343533751606181,0,0.0012212654435979,0,0,0.0678469880361398,0.0345898507432292,0.111053438588917,0.0854231693240795,0,0.0121134938656094,0,0.117605269998649,0.163118734601284,0,0.0218662865786001,0,0,0,0.00301353405315771,0,0,0.0248692429614892,…
TCGA-OR-A5KO-01,0.10189067169752,0.108902012352948,0.206225668577004,0.106817100779961,0.0677921769682334,0.453732836888409,0.0547013603657635,0,0.0860879407106684,0.020796997664792,0.136547190132753,0.188814522749748,0,0,0,0,0.0415386111229296,0.028184676524743,0.0461469278189703,0.17186058563237,0,0.122962541038265,0,0.0768211380134563,0.0255375082255411,0,0,0,0.00491049961501044,0,0.0077280491…
TCGA-OR-A5KT-01,0.13229737892173,0.127339323784787,0.238688504761526,0.121116189109473,0.142245436407017,0.467348777087939,0.0126466591281557,0.011809666404417,0.0979549125515074,0.0494547302014006,0,0.101870933642517,0,0.0246698041712464,0.000438822926356494,0,0.0026027964963731,0.0401981151546403,0.0981310486288606,0,0.00889060677629501,0.546330847841613,0,0,0.00206142167728667,0,0,0.0029396343…
TCGA-OR-A5KU-01,0.0949492024867169,0.119557761341047,0.217967119663068,0.106183984302076,0.0521881558638178,0.478570173691119,0.0274626195080239,0,0.195850124329985,0,0,0.178427487986485,0,0,0,0,0,0.0403013372972401,0.00270233299597695,0,0,0.463692194617797,0,0.0627497526754283,0.0288141505890644,0,0,0,0.00346554594287989,0,0.0247145980952762,0,0,0.0225160115155493,0,0,0,0,0,0.00508568149962087,0…
TCGA-OR-A5KV-01,0.131825709908922,0.147903671133063,0.115010993264015,0.102003099170348,0,0.621698440684875,0.0518602942908508,0,0.14425838739395,0.207249735095265,0,0.153021041315967,0,0.0665363364544606,0.00384026155371346,0,0,0.0870204018374442,0.114051967182481,0.0623918498253677,0,0.0488117189263639,0,0.0216841418231485,0,0.0392738643009876,0,0,0.0045134988355923,0,0.0125550784551156,0.01803…
TCGA-OR-A5KW-01,0.103070328997151,0.102287961981423,0.204574183959159,0.109485602705336,0.0504054130563052,0.472790381646935,0.0823765473364884,0,0.115658095948532,0.00667303973729757,0,0.07791852919749,0,0.0806956612961151,0.0132428290222445,0,0,0.0817589490327998,0.0583030971707973,0,0.00396456249466842,0.3343273134925,0,0.0843294574467923,0.033034204036881,0,0.0277177137873933,0,0.008423149934…
TCGA-OR-A5KX-01,0.106115869782795,0.107367259447045,0.200712198495434,0.111510763639171,0.0791598539226556,0.449155132192421,0.0110783518372518,0,0.0265823103372601,0.0465178611998433,0.0345175774125262,0.00733313368914111,0,0.00432102647446795,0.0457210959972779,0,0.0227035608227759,0.0465820229289621,0.322953001204006,0.0160117055406772,0,0.182710128968581,0,0,0.232968223587229,0,0,0,0.00098062…
TCGA-OR-A5KY-01,0.113108339688672,0.108509602058566,0.20181435182961,0.109713954152248,0.069713410567483,0.478350442444824,0.00407551852973576,0,0.0194643548783591,0.0503260545552786,0,0.189159893521573,0,0.000279912159673463,0,0,0,0.0386950568127198,0.0937366256424333,0,0.00268885916676513,0.521709587545705,0,0.0345966633828959,0,0.0330526975113514,0.01221477629351,0,0.00078757815188418,0,0.0037…
TCGA-OR-A5KZ-01,0.0957890773653878,0.100877696288923,0.233006966973281,0.113402185492351,0.0676557621386302,0.475322290820739,0.102529249794643,0,0.16752996523498,0.0814988186832385,0,0,0,0.0655240086716518,0,0.0020094935203612,0,0.0305620120694095,0.00712179405529553,0.15380857013451,0.0444495799668123,0.301693283780557,0,0,0,0.0432732240885406,0,0,0.0229778728962131,0,0.0375452103198506,0.01826…
TCGA-OR-A5L3-01,0.102654224619848,0.0935110150489132,0.208426299159375,0.109059397068348,0.0468890530133427,0.462951962870236,0.0234928574319142,0,0.124129567209479,0.0573142457264521,0,0.0686938332872357,0,0.0534238995047193,0,0,0,0.133627771491316,0.14211842177598,0,0,0.297526069170993,0,0.0695121551578312,0,0.0301611792440794,0,0,0.000955990600855392,0,0.00505118204051692,0.00233227824109517,0…
TCGA-OR-A5L4-01,0.111719331255277,0.100840953730904,0.218092657785931,0.10645957093632,0.0627113606453659,0.468534538852489,0.0280896908797693,0,0.0485185345063364,0.0373825308395491,0,0.268224986702619,0,0,0,0,0.0761657183012486,0.00219004407092708,0.060279996977586,0,0.021457033196104,0.383285713124586,0,0.0529823560805171,0.021423395320757,0,0,0,0.00312174865560726,0,0.0053921088172699,0.00415…
TCGA-OR-A5L5-01,0.122093719302785,0.118810347056937,0.238676085888533,0.104739967276937,0.0851717961961929,0.486942988907742,0.0331818615316528,0,0.00737820482933538,0.204412278953429,0,0.163080848419961,0,0,0.00687678293623683,0.0162678502234418,0,0.0104886010674541,0.0751619184277007,0,0.0311695883354004,0.343709509817422,0,0,0.108272555457967,0,0,0,0.0121150378663392,0,0.00269385823359357,0.07…
TCGA-OR-A5L6-01,0.0988891800812605,0.107475897431377,0.219860702754346,0.111394438103115,0.0651560220136173,0.470166547272803,0.0459191357305223,0,0,0.0978910237397309,0,0.157148297038549,0,0.0181732068302533,0,0,0.054529998901192,0.0712216599163777,0.0474893887728163,0,0.000726929082520236,0.443590228860451,0,0.0393324603402864,0.023977670787301,0,0,0,0.00598168050588716,0,0,0.0127518259890957,0…
TCGA-OR-A5L8-01,0.100790582605073,0.100459147393094,0.210433599706616,0.110567394208991,0.0438737120770563,0.48573224935824,0.0817920811415929,0,0.0894156855371818,0,0.101280863880928,0.181595431585361,0,0,0,0,0.0434403443552737,0.0394258405122779,0.0659810205828304,0,0.0107810949326157,0.345494700853149,0,0.0407929366187896,0,0,0,0,0.0065819919669915,0,0.00719548048801863,0,0.0081502979649118,0.…
TCGA-OR-A5L9-01,0.0982715213783772,0.112087179423654,0.216729876683944,0.104230605339185,0.0487730789628459,0.474194806340725,0.0214632309057108,0,0,0.171090569287511,0,0.240275385764244,0,0,0.0154046412851542,0,0,0.032772366790007,0.0428879071330842,0,0.00986599421960735,0.394644938462786,0,0.00534206876887436,0.0662528973830208,0,0,0,0.00157084037179081,0,0,0.0125216923141793,0,0.01758515658542…
TCGA-OR-A5LA-01,0.102224026792764,0.107329699781248,0.220571290829093,0.111128083907982,0.0834262236952666,0.459802912397449,0,0.000980905874445026,0.0239265945545057,0.146036157894151,0,0.182917518219098,0,0.00465198850607801,0.0129963171376218,0,0,0.049049947289659,0.0110332581210868,0,0.00862337971845731,0.373487822063288,0,0,0.186296110621609,0,0,0,0,0.000162564267704936,0.00396532371123455,0…
TCGA-OR-A5LB-01,0.105241393673276,0.0994884538797644,0.207924109748731,0.1077924657396,0.0550765683227811,0.463091445262784,0,0.00652327966228138,0.183111928207089,0.0840182257629424,0.0355394391125509,0,0,0,0,0,0.0342516451848244,0.0298524572971025,0.00438271532476377,0.00889722489903687,0.00447284903546851,0.489141361914113,0,0.034518392469529,0.0640266428271639,0,0.0212638383031338,0,0,0.00057…
TCGA-OR-A5LC-01,0.0926808429618246,0.1263780753247,0.213625544414491,0.107738642501011,0.0612750132538018,0.467787731236721,0.0453746033681434,0,0.0835189830569452,0.0493621154106976,0,0,0,0.038280880485722,0,0.0249889549054914,0,0.0190028904801823,0,0.198829739912307,0.0469939510629339,0.488864460070447,0,0,0,0.00478342124712967,0,0,0.00525344733056353,0,0.00966978322723887,0.00571511934399327,0…
TCGA-OR-A5LD-01,0.102159267828661,0.0960147197174437,0.206673279596406,0.106950558929333,0.0398693820981382,0.464140409097992,0.0991567658891816,0,0.203891027466345,0.0115741430694777,0,0.00295815551540064,0,0.107702869458652,0,0,0.0206288493056388,0.0628078955658153,0.16321498442181,0.0277562086441126,0.00667993841530294,0.218385211762623,0,0.0543697982816839,0.0208741522039573,0,0,0,0.004494297…
TCGA-OR-A5LE-01,0.102450295946843,0.0868570007774459,0.225925320488259,0.111417409052593,0.0467599857461834,0.460572866326548,0.0829083239094471,0,0.164124912248135,0,0,0,0,0.143195437458438,0,0,0,0.0578319183879669,0.0215531560408191,0,0,0.151225729384136,0,0.307149809790772,0.0196958427795107,0,0.0523148700007749,0,0.00420801224974842,0,0.00833016045509926,0,0,0,0,0.00726788489405863,0,0,0,0.00…
TCGA-OR-A5LG-01,0.108969185375315,0.107195140340575,0.207125697129998,0.112411093496096,0.0872908723217012,0.467706379462267,0.0195868283339383,0,0.00876559762779311,0.0395603988460188,0,0.180761700264269,0,0.000609656938077413,0.0013691587702115,0,0.0205252704336364,0,0.0370110317872364,0,0.00544340918518261,0.59085138011525,0,0.00396240330640939,0.0915531643919774,0,0,0,0.00337232284063966,0,0.…
TCGA-OR-A5LH-01,0.110853504976853,0.0924528942155784,0.223071404576516,0.111011794047741,0.073182560118973,0.483872548088914,0.0684152165427482,0,0.0327859613587124,0.14976470614723,0,0.123634029669932,0,0.0339062846483855,0,0.0570209960330608,0,0.0416377503395298,0.105488332459958,0,0.0164653204856899,0.280440975609411,0,0.0164468653451164,0,0.0739935613602256,0,0,0.0161462955104621,0,0.00773763…
TCGA-OR-A5LJ-01,0.109321960898158,0.109168718523427,0.221969078543885,0.10382167136141,0.0630644137080751,0.476616337027194,0.0413175487438555,0,0.0672551308855646,0.243792882882839,0,0.0255935069680485,0,0.0992672579185849,0.00531104860036462,0,0,0.060272994999645,0.0234357245983887,0,0.0780148954776971,0.260662387105283,0,0.0950766218197284,0,0,0,0,0.00950126855214631,0,0.015465802775837,0.0560…
TCGA-OR-A5LK-01,0.12170870817204,0.124943621204262,0.20540789623247,0.111194280155164,0.103573848599378,0.509736188198449,0,0,0.0416207473494964,0.16258088974219,0,0.126991879892254,0,0.0158158886985916,0,0.00761168892520215,0,0.0453370126767189,0.0587185996351861,0,0.0156895689456747,0.422691225414852,0.00753071727741502,0.0007119039260424,0.0911771562434097,0.00352272127296741,0,0,0,0,0.0122987…
TCGA-OR-A5LL-01,0.10419684885181,0.0912169191030099,0.216589751340198,0.113282010804501,0.0749378326158652,0.460617114932428,0,0,0.0867551776815006,0.0795797452391223,0.149884107645364,0.238946114761619,0,0,0,0,0.0203911131531925,0.0539470596933483,0.0268596296578942,0,0,0.237913794742971,0.00198150624103438,0.0395841287040227,0.0641576224799312,0,0,0,0,0,0.0102684611132119,0.0094191671462796,0.0…
TCGA-OR-A5LM-01,0.105782333635127,0.102963853079202,0.201564324714124,0.110075930335124,0.0564226006323038,0.467417497103298,0.061054652107308,0,0,0.141011405954775,0,0.224512675689907,0.00209965849770978,0,0.0680118809457289,0,0,0,0.0489339667322966,0,0.000529869383390413,0.356521311086484,0,0,0.0831763634222359,0,0,0.0141482161801637,0.00613944663151686,0,0,0.0141796238519698,0,0.02257622544592…
TCGA-OR-A5LN-01,0.105580477542258,0.118787174616049,0.212294102837854,0.109987663027534,0.0633713462167885,0.486694966332594,0,0,0.0273244997835991,0.199362939755642,0,0.134247611034424,0,0.0604569881259719,0.0115314857937252,0.0142166329054686,0,0.0349772140880235,0.050349844740911,0,0.0656660837541185,0.382422109196381,0,0.00302869368280625,0.0164158971389299,0,0,0,0,0,0.00403589168002512,0.029…
TCGA-OR-A5LO-01,0.0972709642727496,0.103077967373952,0.204552804927175,0.103928252664588,0.0625187241336709,0.466268343936412,0.0140299191642536,0,0.173960823107828,0.0301638465901495,0.118701434784116,0.131774825184339,0,0.0128461554442622,0,0,0,0.0678026430008479,0.0275015747697687,0,0,0.331929539895186,0,0.0841166572870368,0.00717258077221173,0,0,0,0.000945556558524539,0,0.0117242156059625,0.0…
TCGA-OR-A5LP-01,0.120759042012736,0.135151003928461,0.232441030577569,0.097507116724275,0.0917317426744637,0.518550979561575,0.0134817033954187,0,0.0233962002836993,0.0443108388582283,0,0.19335007522172,0,0.000532621489635015,0,0,0,0.0323645396518445,0.0743693878808134,0,0.0287977209164831,0.436432337401032,0,0.0641116142593819,0.0888529606417433,0,0,0,0.0041534215439673,0,0.00720786383257119,0.0…
TCGA-OR-A5LR-01,0.0948934213377947,0.124055393611613,0.221464780789784,0.104778901565455,0.0644432868453623,0.502093010253145,0.0261272675062927,0,0.0863202552116467,0.0640865669997023,0,0.255775769955869,0,0,0,0,0,0.0440675263775423,0.0506872466362968,0,0.0150045367012628,0.402362266359372,0,0.0055323425484325,0.0335595732454119,0.0148855734402418,0,0.00159107501792949,0.00496806876589524,0,0.01…
TCGA-OR-A5LS-01,0.103279657271875,0.0983894963991285,0.215640055691319,0.108765882568747,0.056288058892392,0.461321565601661,0.0116849028044348,0,0.126445123857608,0.00302277371950572,0.12403996643515,0.106024022532701,0,0,0,0,0,0.0423354083978657,0.0331419301633595,0,2.68522174175873e-05,0.436130298524031,0,0.0705108870347647,0.046637834313163,0,0,0,0.00108103088245738,0,0.0116980933529326,0.000…
TCGA-OR-A5LT-01,0.10602524866938,0.105161674440823,0.20235984727111,0.106926444362436,0.0488425908037327,0.477457775346799,0.00163770567243599,0,0.0428431100036901,0.0938248439173612,0,0.21034019759934,0,0.0190946313007026,0.0230807578616141,0,0.0290467184604845,0.0259616982290412,0.093483382826351,0,0,0.274845392422043,0,0,0.180965816425314,0,0.00487574528162258,0,0.000142595828683662,0,0.003730…
TCGA-OU-A5PI-01,0.120174013170456,0.0974901238717901,0.215782298369879,0.10694737784609,0.0501378742783326,0.487619756528296,0,0,0.0587229108112366,0.0475267678431261,0,0.199471015615864,0,0,0,0,0,0.0733769825925302,0.171647957085875,0,0.00254072392684732,0.417038251208723,0,0.0132591686585037,0,0.0164162222572941,0,0,0,0,0.00988931866124019,0.00800381564276137,0,0.0335922114529963,0,0,0,0,0,0.01…
TCGA-P6-A5OF-01,0.101506301592072,0.118852033472902,0.211397144988721,0.110537260847226,0.0626264276896689,0.487402067047396,0.0349153514442364,0,0.0569976786540065,0.0321347153154066,0,0.282147886011734,0,0,0,0,0.0270775704182051,0.00685142109302656,0.188422372439242,0,0.00478478918405525,0.310165109690272,0,0.0379755111851008,0.0185275945647147,0,0,0,0.00919178595469799,0,0.0150051607797513,0.0…
TCGA-P6-A5OG-01,0.127450561406931,0.126992484541656,0.296252866557293,0.171051460338237,0.193246833005902,0.462740268648445,0.00296447898938242,0,0.0174242073808863,0.149532172044648,0,0,0.00411461548620426,0.0335966171669623,0.00408247857840585,0,0.037873398585839,0.0146412211528373,0,0.193823028441249,0.0433668855293856,0.369700325676117,0,0,0,0.0646540321250565,0,0.0642265388430265,0.003069669…
TCGA-PA-A5YG-01,0.10383593158753,0.120084639653911,0.237198611662734,0.114923766816285,0.114776368085402,0.474421065577104,0.00810361985218818,0,0.0148699040904839,0.104085431282445,0,0.12175723788315,0,0.0209169054898468,0,0.0332272566073761,0,0.0790704970587702,0.045180571402522,0,0.00147247660169711,0.439812328921042,0,0.0064917134724451,0.108340483122172,0.0166715742158619,0,0,0.0035380154033…
TCGA-PK-A5H8-01,0.102567838831511,0.107581702451908,0.211562504513767,0.1165345256011,0.0801442254417914,0.463205507167502,0,0.00180641041573591,0.00393359847395969,0.0102325934549901,0,0.150666760315025,0,0.013395391061204,0,0,0,0.0688558774362576,0.164312788719874,0,0,0.446111394913527,0,0.0122148327713328,0,0.122326437310158,0.00614391512793615,0,0,0.000255265119357696,0.00055585955174617,0.00…
TCGA-PK-A5H9-01,0.118356549323387,0.10054697778663,0.21469092395697,0.0945007414106069,0.101002662761859,0.574084612102738,0.0862338609889885,0,0.108029884822683,0.0779169710041255,0,0.135898137436619,0,0.00723720568234123,0.00273126242465813,0,0,0.0788489490740573,0.0788916586973259,0,0.00866377686583946,0.326793720684914,0,0.00701878118439583,0.0650052156277893,0.0119834104682438,0,0.0047471650…
TCGA-PK-A5HA-01,0.127187834186535,0.103786456359735,0.223873013912718,0.101562458211201,0.130136689596728,0.499165714696386,0.00903638781531531,0,0,0.0873940398504002,0,0.10816129779062,0.00660792303736777,0.00611964334392849,0.010759064422977,0,0.0182402586181805,0,0.0289442009280733,0,0.00011320701773253,0.696568496822511,0.00469797355163887,0,0.0233575068012546,0,0,0,0.00198947977879562,0,0,0.…
TCGA-PK-A5HB-01,0.104342998303115,0.111002900515451,0.205712969678961,0.110617950006094,0.0603705662112106,0.469553780160289,0.0490159619956565,0,0.123643781757623,0.00571624482666822,0,0.235785077933347,0,0,0,0,0.0502923745033038,0.00355122608058706,0.0388718932188227,0,0,0.309530198447291,0,0.143547979605801,0.0400452616308993,0,0,0,0.00535213206984187,0,0.0135008642621387,0.000624166006546801,…
TCGA-2F-A9KO-01,0.140539638857531,0.157060668153953,0.181895310856904,0.163015312127865,0.0531916301985932,0.521920233244372,0,0.043710513244761,0.0635542639310061,0.2629470048336,0,0.0702604153852298,0.0707036450509386,0.133747218969256,0.0283064452453175,0,0,0.0471496209360851,0.0146923484592675,0.0273206588349445,0.103041846020821,0.112077973902024,0.00655569355172462,0.011240669699481,0,0.004…
TCGA-2F-A9KP-01,0.0694670108313261,0.0895420039683698,0.139385131869199,0.0681885593798479,0.00716309405844692,0.359780429758784,0.117555805883376,0,0.245357066518491,0.0513177961331285,0,0.091983254627985,0,0.0548586397652466,0.0218761161042874,0,0.00537999802729749,0.01749118994889,0.052657728013925,0,0,0.145078683466886,0,0.138560819454973,0.00381593080616893,0.0219302351764764,0,0.03213673607…
TCGA-2F-A9KQ-01,0.0805521150245642,0.0880353257454579,0.132563698455922,0.0719311775814914,0.00540521973285722,0.386632813314279,0,0,0.0669760061021735,0.0895846969242466,0,0.0775526848918353,0,0.0649902241130507,0.0680358917021423,0,0,0,0.11093179189354,0.0725796094422065,0,0.101105826516011,0.0121221389614612,0.11513779481538,0.217587311463322,0,0.00339602317463146,0,0,0,0.0075943958478001,0.01…
TCGA-2F-A9KR-01,0.0917628204076682,0.116996077858515,0.12132244152682,0.105308393859647,0.0571932173178805,0.345985615652902,0,0,0.280104510032877,0.099357511316104,0,0.0525305297031109,0,0.191771597632852,0,0,0.00980980859023493,0.0667807704681265,0.0619784458342084,0,0.00091252376193999,0.111178234533742,0,0.0998735822618707,0,0.00775556748327132,0,0.0179469183816622,0,0,0.0776295271807592,0.02…
TCGA-2F-A9KT-01,0.0531748393630656,0.0939465519958638,0.209811966346068,0.106534220553957,0.0311135323385371,0.462539624091422,0,0,0.112086727116052,0.0634968723620528,0,0.0360757884887325,0,0.0954008203563646,0.0165862004922009,0,0.0144776932250368,0.0424359703529973,0.0426080757308553,0.170740949042956,0.0469056290570512,0.140310949770808,0,0,0,0.113882643770913,0,0.104991680233979,0,0,0.019744…
TCGA-2F-A9KW-01,0.00379409459406655,0.140415712368938,0.164980740205818,0.112701916171916,0.13480034871802,0.482807960386443,0.0809286591465444,0,0.0109670371004429,0.00741096291300135,0,0.0591730295481464,0,0.00918990306917589,0.0322616274717304,0,0,0.0161927534823533,0.00660197582091416,0.203787510612773,0.0208462458440436,0.346900551871065,0,0.0702227442669942,0,0.0787563171301403,0.0159895577…
TCGA-4Z-AA7M-01,0.016901692677496,0.121334065732855,0.183749626378174,0.0602145285788505,0.148341447825208,0.301803151044135,0.0524845791168898,0,0.16553819827187,0.0583567027076404,0.168711851653915,0,0,0,0.0120089974581232,0,0.0683304056730021,0,0.0118117474719267,0.173448595147695,0.0387120777293841,0.201381683900501,0.00237205918999146,0,0,0.046843101679061,0,0,0.00969299960804281,0,0.0305720…
TCGA-4Z-AA7N-01,0.705186643349954,0.655301691562201,0.0592432936064527,0.227038033251076,0,0.798372661371791,0.204446746143324,0.158945206480387,0.01286192822173,0.106963393336961,0,0.110978203055888,0.00396957216099283,0.0646177661697975,0.0717361696070425,0,0,0.0449779286685151,0.014066889155414,0.0810381815840368,0.0230757647883255,0.0941644567510247,0,0.00541900295093835,0,0.00273879092562206…
TCGA-4Z-AA7O-01,0.0964296745512763,0.105382269467108,0.17480185291051,0.0947233203617562,0,0.403707249188545,0,0.0318794560691615,0.113054923834699,0.190205448290104,0,0.130425398567489,0,0.157917465032958,0,0.0025738194574423,0,0.0719869391033335,0.0043320569662036,0,0.0102982191150987,0.185371993408606,0.0043823946153761,0.0731300479600187,0.00198954841615918,0.0152647746711452,0,0.007187514492…
TCGA-4Z-AA7Q-01,0.133956939527008,0.119044186981732,0.191676227825928,0.143309120999003,0.0569184853631938,0.51510035858115,0,0.0093824596790849,0.0584800196889009,0.217734453616507,0,0,0,0.133190014725335,0.0425875090702073,0,0,0.0712175885554621,0.0168248484597543,0,0.242716133907555,0.171245465395404,0,0.00821204556483881,0.0281711705410769,0,0,0.000238290795873612,0,0.00560339469692159,0.0349…
TCGA-4Z-AA7R-01,0.0790917355099132,0.112838819624405,0.117107164492845,0.0809840055881193,0.0568620441242751,0.406902241601824,0.0225942098052033,0,0.148411311471719,0.0335890867312191,0,0,0,0.107679803179338,0.0211416328622941,0,0.0343005827476689,0,0,0.101444269375348,0,0.362922732140738,0,0.0490537000171333,0,0.118509064496606,0,0.000353607172731578,0.0036355563450577,0,0.02388035207919,0.0054…
TCGA-4Z-AA7S-01,0.0821834543664333,0.0578050259746423,0.205155033788294,0.063908031967654,0.0235325905904637,0.345554322160418,0.00708685865915993,0.0341264521748272,0.0457397560545605,0.131974329161977,0.140990364604317,0,0,0.258988220159324,0,0,0,0.0423753618765385,0.028765224285654,0,0,0.13913634723452,0,0.0769978964399527,0.0938191893491695,0,0,0,0.000839669828019977,0.0040433926520507,0.0054…
TCGA-4Z-AA7W-01,0.244506713279244,0.0838148347523621,0.438947562440892,0.170916078071856,0,0.752008513865058,0,0,0.0187934788923456,0.311220649050591,0,0,0.160177130708947,0.128136201739195,0,0,0,0.172434142549382,0.016098418342814,0,0.0566835753293246,0.121915561886835,0.00222726727265085,0.0123135742279158,0,0,0,0,0,0,0.0112432840809053,0.186189166421162,0,0,0.0958266957459636,0.076658064504955…
TCGA-4Z-AA7Y-01,0.0982110666822913,0.0650591841995494,0.208402629887744,0.109415459044426,0.0637051534211659,0.44190314848141,0,0.0141531391548542,0.10649375803674,0.0461877181867891,0,0.0539943393938538,0,0.0614401210859272,0.0340759812421583,0,0,0.0247870120474525,0.0351322179311559,0,0,0.170791768383275,0.252864670412893,0.125514593147897,0,0.0735175181834781,0.00104716279352653,0,0,0.00153112…
TCGA-4Z-AA80-01,0.0549885263360326,0.0610180580043144,0.186052258587162,0.107663326082411,0.0352942035072896,0.379107456499092,0.0605998252981488,0,0.138715169638995,0.137160113326551,0,0,0,0.178086823264455,0.0137370522772825,0,0.0257342012450936,0.0307970220567867,0,0,0.0841724069086955,0.203331974343064,0,0.0583934869766031,0,0.0681046998751431,0,0.00116722478918175,0.0103537075856678,0,0.0237…
TCGA-4Z-AA81-01,0.023771162435312,0.13336638953812,0.168998819673354,0.117624015900683,0,0.501842690984306,0.000385540248337709,0,0.0226401868689934,0.274189270682738,0,0,0.0640884453160035,0.190340242588476,0,0,0,0.108579874382323,0.00845278912781691,0,0,0.113707277814651,0,0.211565117291158,0,0.00605125567950232,0,0,9.95878946807694e-05,0,0.00584812754357955,0.0708251144441637,0,0,0.01655451893…
TCGA-4Z-AA82-01,0.0480697268267998,0.180473641521817,0.282733454101965,0.140321530095268,0.00202034005592693,0.795064490258939,0,0.0108798071563331,0.0878151165995336,0.00529023278855947,0,0.094384498180999,0,0.0648087062279217,0.0136741544938548,0,0,0.0586931945520753,0.0154148126273358,0.0178321309344354,0,0.163561865425228,0.18868364073856,0.189312491530772,0.0849872640719357,0,0,0.00466208467…
TCGA-4Z-AA83-01,0.0502029124126955,0.149696620872368,0.0779410234484241,0.127755851429752,0,0.45251419195938,0,0,0.0615950255877788,0.0677101070701882,0,0,0,0.096051773815935,0.0450800519012386,0,0,0.102158294157653,0,0.107847551457764,0.0398119182099364,0.232620094839635,0,0.103868803548922,0,0.111950830487533,0,0.0313055489234162,0,0,0.0164755500137641,0.0181112231844506,0,0,0,0.025692104002131…
TCGA-4Z-AA84-01,0.0226193281543022,0.152967019605493,0.163629631653664,0.066106024816496,0.0181514138178573,0.474361467264218,0.0293330064000517,0.00150690028014951,0.157749357631407,0.0999702272261457,0,0,0,0.115669512698068,0,0,0.0284059298199691,0.0223462549602914,0,0.182843422671147,0.015251909589088,0.24760161912474,0,0.0268318344456322,0,0.0659447006926676,0,0.00654532446064236,0.0051695186…
TCGA-4Z-AA86-01,0.0507131468925035,0.187766867388174,0.265577593285108,0.292713390553069,0.0487535155540259,0.873211074397629,0.000336528416988716,0.0041446910908014,0.00471091292430502,0.104004480411125,0,0.0517616655026422,0.0326757454639509,0.0595898916837371,0.0196113013513891,0,0.0147698352052832,0.0202433226963914,0,0.194199348020566,0.0839335728341487,0.247126475607594,0,0,0,0.160130850544…
TCGA-4Z-AA87-01,0.0200433843817327,0.117444945641401,0.137742684808482,0.0520922330106464,0.00399342913034955,0.351963301584526,0,0.00200965926742466,0.107304696343762,0.164557364972106,0,0,0.00558924971217827,0.0645594598068666,0.00825338336270256,0.0151852799868382,0,0.0595615775265899,0.00882617682477855,0.0634280972009633,0.0782101461132684,0.264514967802582,0.0807534083726955,0,0,0.077246532…
TCGA-4Z-AA89-01,0.0769173800248366,0.11305988836666,0.0967904459391267,0.0728666046672511,0,0.354095496011717,0,0,0.0530564674008367,0.18048460810238,0,0,0,0.224089645671671,0,0,0,0.0610367023902081,0.0154673355198651,0,0.113207184661518,0.286975857433305,0,0.0531390565185774,0,0.0110966147091977,0,0.00144652759244121,0,0,0.00540410038329493,0.0183833750644606,0,0,0,0.0228247940240289,0,0,0,0.006…
TCGA-5N-A9KI-01,0.088106012777004,0.211574268249468,0.17946246760067,0.136179761495431,0.134215265466668,0.53603050731232,0.00789941982307404,0.084820083215213,0.0026611178830038,0.0512057372532177,0,0.0587033325921954,0,0.0698236345984901,0.0177787565913886,0,0,0.0527765654118706,0,0.133366968560969,0.0204437481387973,0.3232258995026,0,0.0559268374121341,0.0794632261328809,0,0,0.0419046728841653…
TCGA-5N-A9KM-01,0.113086318211067,0.0592885969472423,0.207422603218202,0.136363818288005,0.130415552061151,0.439912303670879,0,0,0.0908711549933891,0.213094965722107,0,0.0915338830899805,0,0.0920841260946107,0,0.0769602272389003,0,0.0723504416058887,0.000114922466448855,0.0330847227493814,0.0299260012998568,0.181927450361873,0.00273915021214851,0,0.107499417608311,0,0.00781353655710454,0,0,0,0.02…
TCGA-BL-A0C8-01,0.0547059253206287,0.0842754070799049,0.134893817076506,0.0729383896506397,0.092907715222246,0.381006579163831,0.0205020219249743,0,0,0.0350594256800995,0,0.0736287495652942,0,0.0683182321445586,0.054842671941065,0,0.11198271336189,0,0.117751241613943,0,0.000895589639870949,0.447737707957684,0,0.0324844879458759,0,0.0265336816859275,0,0.0102634765388167,0.00361451631979745,0,0,0.0…
TCGA-BL-A13I-01,0,0.261580974231172,0.139131751898298,0.203186192053759,0.678549709324459,0.756424912125905,0.00846447891044616,0,0,0.0313062299944016,0,0.167483955994423,0,0.0173166132669962,0.0184443339330389,0.00618338860468295,0,0,0.00190025618336241,0,0.0140780439963503,0.658487436528862,0.000841766394761391,0,0.0262731849561795,0.0459503034042568,0,0.00327000783223886,0.00679411804061457,0,…
TCGA-BL-A13J-11,0.011743069205926,0.136219970526389,0.285468743045416,0.163696211513636,0.087270895772288,0.655946346651604,0.0596078764201313,0,0,0,0,0.0816872371377183,0,0.00580136424656738,0,0,0,0.0388497692928577,0.0592141030140359,0,0.00331180526180336,0.431827397234322,0,0,0.268035683379719,0.0178215398311658,0,0.033843224181679,0.0118999520288339,0,0,0,0,0.016307814699779,0,0.0011581683559…
TCGA-BL-A13J-01,0.0489146468109945,0.0966078668658331,0.148215056398412,0.10429948726092,0.0893433648467897,0.368250648233979,0,0.00932610122206458,0.0946859821882053,0.100845701627848,0,0,0.0749592957720198,0.0468106125731503,0.00893650125651404,0,0.0457514469827395,0,0.000608378521883761,0.0700608916673475,0.0678806384127285,0.324790624216152,0,0.0531423593815539,0.089907749614973,0,0,0.0122937…
TCGA-BL-A3JM-01,0.0826205538498077,0.107629823817243,0.205401990215866,0.0900520562396133,0.109632306920467,0.40273822019372,0.00273939998771241,0,0.00219731167017545,0.198657629977073,0,0,0,0.125106703268514,0.0255585449762911,0,0,0.0379995483125401,0.0240634225521058,0.342332629553808,0.0612808266504069,0.165949122685596,0,0,0.0141148603657775,0,0,0,0.000908360542964233,0,0.000728608903677836,0…
TCGA-BL-A5ZZ-01,0,0.0945616754914979,0.314032293174439,0.174703413406146,0.174438121734971,0.624675678453839,0.00421721579599138,0,0.0295961694117938,0.0154902527835764,0,0.00969980495450264,0,0.0488991097789659,0.0386038437806268,0,0.0365499033261723,0.00285099321662065,0,0.398224248897658,0,0.361916296097848,0,0.00630047720916184,0,0.0342429515086688,0,0.0134087332384134,0.00285598448104936,0,0…
TCGA-BT-A0S7-01,0.0671015373824674,0.0781690460672519,0.151651867716237,0.0588984991008828,0.046376602049479,0.361704840963905,0.0298995261907388,0.0309690855228375,0.0165892676803554,0.0561016166885353,0,0.186402036992684,0,0.115112788303297,0,0,0,0.0124624470673603,0,0.0508128890548841,0.0141710631787385,0.41939822137059,0,0,0,0.0574374657995043,0,0.0106435921504755,0.00614862887213585,0.006368…
TCGA-BT-A0YX-01,0.0757252516226001,0.0760487112532832,0.199694361199184,0.158911002364067,0.0962518711316717,0.41883029650639,0.0258858234831764,0,0.0518520742355576,0.179716543117932,0,0.0939304421796685,0.061110365358588,0.0619726963605074,0.0177506637902194,0,0.0242092657318149,0.03672236569836,0.0272256856383931,0,0.0680239933724787,0.198248083092481,0.0333674409528776,0.0278641567646741,0,0.…
TCGA-BT-A20J-01,0.370522486121375,0.299907500117692,0.122114473468402,0.254500453422178,0.0821714869539487,0.964570063744133,0.00620685643561,0.00300640004469447,0.0120222695476438,0.123318019031623,0,0.143520877787408,0,0.0567340495889663,0.0389412614304826,0,0,0.059927113778874,0.0131840574263971,0.0689912837090074,0.12670806220774,0.306219322657126,0.00424172467009404,0,0,0.0369787016843338,0,…
TCGA-BT-A20N-11,0,0.105026109757881,0.284176611733809,0.219974934862425,0,0.791337743291606,0.0292061944023216,0.0379150804276024,0,0.0201724834199197,0,0.26869777948674,0,0.0218797250725625,0,0,0,0.0648358307593343,0.0714687731938404,0,0.00790273053962192,0.319813938063499,0,0.00811826838950278,0.111779278822847,0.0047622254753861,0,0.0334476919468225,0.00978566833730124,0.0127036202298621,0,0.0…
TCGA-BT-A20N-01,0.0593583604546962,0.0622038564680124,0.184126137140614,0.0331343575583727,0.0985924166544064,0.498188326982801,0,0,0.167804725027168,0.126960377976482,0,0.0538321109195817,0,0.054794928452209,0,0,0,0,0.0275137147241057,0,0.162652124024493,0.270739525002893,0.0168425503742225,0.0120929413523049,0,0.0908582478966094,0,0.0159087542499308,0,0,0.0260514454973008,0.019710418563217,0,0.…
TCGA-BT-A20O-01,0.415039978980175,0.0764981265585003,0.836185496266473,0.369110597656423,0.337488165062831,1.42857995263562,0.0332623946990897,0,0.0300517362899759,0.260225703888931,0,0.0639129910077686,0.100417244403176,0.0289550916042484,0,0.0525056417704457,0,0.0370532090118236,0,0,0.0846747719443979,0.272678345582713,0.00618347164226436,0,0.0108146992999246,0.0133696558347909,0,0.005895043020…
TCGA-BT-A20P-01,0.0616928286058296,0.104417362639132,0.0761524846022351,0.0691424632002042,0.00179218989519365,0.350458371790313,0.000842329494198802,0,0.0208039120541596,0.0147409639743828,0,0.258437642327243,0,0.117208693871783,0.0750882425692309,0,0,0.0337596811973097,0.208357528379273,0.209181920921367,0.0137449638822673,0,0,0.019419587649321,0,0,0.0284145336794636,0,8.48715494896807e-05,0,0.…
TCGA-BT-A20Q-11,0.0123348291606456,0.133733308911769,0.228768988151411,0.10863567163659,0,0.738557249569341,0.00133840119639907,0.00315364746207798,0,0.0374867975771661,0,0.228596296387173,0,0.00651209147734627,0.00476152191422145,0,0,0.047033530080377,0.0916099211145296,0,0.00180134093419733,0.229017558089565,0.00128821253188801,0,0.347400681235058,0,0,0,0.000139987956324657,0.000329850768493413…
TCGA-BT-A20Q-01,0.109583907448998,0.145972971556027,0.162111567075116,0.131401926925762,0.0626816601030861,0.502948543959397,0,0.00277042997587858,0.147062931411145,0.139112609182872,0,0.0654515363032184,0,0.0849961070583868,0.0487680774762303,0,0,0.0500488618421565,0.0229540555566621,0.00719860234207633,0.0814220549892536,0.326724273063492,0.00294535117847904,0.0118761512223357,0,0.0086689583978…
TCGA-BT-A20R-11,0,0,0.301236503838179,0.332871653382098,0,0.736225823509925,0.00199368322185516,0.000441648792464606,0,0,0,0.259699587405165,0,0.00361480159150176,0,0,0,0.0606621218657584,0.0363890104789091,0,0.00399640307315569,0.168693724319923,0,0.00730997468997502,0.348227123501782,0.108971921059511,0,0,0.000407534237238219,9.02786369425139e-05,0,0,0,0.0530859025666881,0,0.000738911474606968,…
TCGA-BT-A20R-01,0.031840658358543,0.106678431548715,0.191220233568867,0.132191464753547,0.230461121049235,0.497413052492589,0,0.00322021052848248,0.00628534105855974,0.0689315333684397,0,0.0885365907031736,0,0.0300565469004777,0.0192313598474471,0,0,0.00123912773260504,0,0.549470887972461,0.0102818709197583,0.196864495733928,0,0,0.025882035234667,0,0,0,0,0.00136837914295939,0.0026708594158198,0.0…
TCGA-BT-A20T-01,0.0939944280131877,0.131199707194985,0.115841713075837,0.100683697862029,0,0.438283519425291,0,0.0217253720860759,0.0457138448035765,0.14933634806043,0,0.131232856002922,0,0.098017504259004,0.0454074445537516,0,0,0.103364808762841,0.00299119029857266,0,0.0763816545702211,0.227708804851019,0.0466603467993872,0.0162332387127997,0.0333266146637963,0,0,0.00189997157560295,0,0.00780950…
TCGA-BT-A20U-11,0.0461441625584553,0.0990985442082615,0.160080718042511,0.120165129997578,0.00959284999088837,0.350441878188949,0.0540599655181236,0.103435043756895,0.0560491242536436,0.158253462286138,0,0.212226107983206,0,0.0692408688150587,0,0,0,0.12246184625774,0.00059983309527,0.00647082152347815,0.0132540329502965,0.11470040214763,0.0143518537497319,0.0111972492898353,0.0636993883729545,0,0…
TCGA-BT-A20U-01,0.0815303166939474,0.113010466440611,0.130249229923869,0.158389780946087,0.0524555739197472,0.413877751714495,0,0.00612640037232776,0.0644046738391089,0.0873952216591559,0,0.0750996931412395,0,0.0754799030958243,0.0617358907932126,0,0,0.0380161515180986,0,0.197826563636431,0.0704933629714036,0.283507127135492,0.0116563210295749,0,0.00762848639049529,0,0,0.0206302044176362,0,0.0018…
TCGA-BT-A20V-01,0.122662686102798,0.154808480058902,0.184177287360059,0.147511186536244,0.0756490938964753,0.464323065782199,0,0.0177364910347456,0.0089415428874114,0.144321142341261,0,0.0910770525858842,0,0.0827294401979218,0.0104152443442149,0,0,0.09866663904946,0.0711571775764804,0,0.0788306596088241,0.188142189667013,0.0148351216713647,0.186761661085866,0,0.00638563794955345,0,0,0,0.005926375…
TCGA-BT-A20W-11,0.0655766899099937,0.200297290753297,0.343660127528804,0.174564379406484,0.0754669154015084,0.710509520132864,0.00499405215753348,0.0160745537660985,0.00712450283911827,0.20839253759255,0,0.202321225422578,0,0.0489387326687423,0.041147550529822,0.0343186151431055,0,0.0910146562753994,0.0277896992414619,0,0.031828065052039,0.16165880428569,0,0.0139840791654557,0.110412925860406,0,0…
TCGA-BT-A20W-01,0.0676271269158324,0.154091877978086,0.170507603408768,0.0791786478805783,0,0.401276143375005,0.113526000659701,0,0.0273198631380827,0.136295374499799,0,0.204916973068149,0,0.0673921916838318,0.0670850491078743,0,0,0.0774815434667552,0.0115410756796232,0,0.0611738808865386,0.159979720828689,0.0158251174579456,0.0218815889700206,0.0355816205529903,0,0,0,0.0583516747488245,0,0.01404…
TCGA-BT-A20X-01,0.0640211477862408,0.0945105022360965,0.222725551747462,0.12503782600944,0.0256574364372514,0.497177097506317,0,0,0.340317705738447,0,0,0.0228839149905521,0.0808686754492815,0.0295210126082616,0.000197816094137055,0,0.099622438745145,0,0.0359903975504529,0.0726099628747022,0.111029161940197,0.127805846893645,0,0.0353915575235411,0,0.0416975593348166,0,0.00206395025682103,0,0,0.115…
TCGA-BT-A2LA-11,0.00120917294112716,0.0721385915451266,0.261158758967774,0.129652679462331,0,0.456850562961703,0.00544511054245316,0,0.0119115749410829,0.232469002480997,0,0.159835279111417,0,0.0362854556541979,0,0.0622063363719763,0,0.0418377987520121,0.0162282248183977,0,0.00205856288496664,0.168585261756228,0,0.0124166531190734,0,0.250251156884054,0,0.000469582683144401,0.00157709745111129,0,0…
TCGA-BT-A2LA-01,0.0634153514290273,0.116825594106944,0.142719321047898,0.0528275732480309,0.104051741841026,0.328981451487523,0.253399135118121,0,0.100063605210792,0.0977429427312524,0,0,0,0.216673504775472,0,0,0,0.106144048061193,0.0317570612212629,0.0430167574122893,0,0.0497589338739416,0,0.000955223508608895,0,0.100488788087067,0,0,0.0497660770048896,0,0.0196518945496237,0.019196130296106,0,0,…
TCGA-BT-A2LB-11,0.0640276993944526,0.112273584544288,0.205864451286922,0.127268373274004,0.0327528844171192,0.426260707054542,0.0699286831088423,0.107196493560282,0.0440185370892951,0.12104254313519,0,0.114546137132421,0.013551038448275,0.0468254344599953,0.00288748273510211,0.0018203407065171,0,0.0654904273638049,0.0255754704680723,0,0.0152962358752947,0.177935274507962,0,0.0448353828669981,0,0.…
TCGA-BT-A2LB-01,0.0338432449221635,0.180851234287226,0.199521295267764,0.146292555872581,0.0569166154469533,0.481301395531244,0,0.017538949680613,0.0988301093121839,0.122216088017165,0,0,0.070803172629208,0.0651286639406133,0.0370870982751515,0,0.0231826107119782,0,0.0157234768735826,0,0.103625479312321,0.265937682243251,0,0.050921217621251,0,0.0604837789091831,0,0.0685216724734983,0,0.0093057524…
TCGA-BT-A2LD-01,0.0735748512024895,0.116536961548796,0.132511795366361,0.10685220254784,0.128776760202911,0.406873396998,0.0420803907269353,0,0.109171389551505,0.16107413923665,0,0.0256738281473872,0,0.164456677040126,0.00034621424413333,0.0035134180202999,0,0.0641939851239323,0.00242500064618621,0.045949196819189,0.105260647736434,0.162869422846316,0,0.0105115340579523,0.102474155802953,0,0,0,0.…
TCGA-BT-A3PH-01,0.0315339684629792,0.0928581071580379,0.106584996986644,0.0639276834242343,0.0531025554052389,0.440024499416406,0,0,0.0596306810850978,0.0670872890684685,0,0.143211200969681,0,0.0603384829270998,0.0717302625401166,0,0.0183440387667696,0,0,0.0558813565376349,0,0.148611462433291,0,0.173103465070751,0.168133690457134,0,0,0.0339280701439564,0,0,0.00662414498227554,0.00745247113014146,…
TCGA-BT-A3PJ-01,0.12026716802619,0.117897474999128,0.158454022803251,0.22107011188114,0.0350537482496182,0.708507773038308,0.00437643960204614,0,0.0185123143593673,0.0872739849320424,0,0.0508565868395476,0,0.09739723738526,0.0442521917527982,0,0.029883346723311,0.0458195620881344,0,0.109809282032476,0.157830275146418,0.293833854842606,0,0,0,0.0580167276682642,0,0.00213819662772886,0.0021381122684…
TCGA-BT-A3PK-01,0.0425353132427028,0.0713568309799861,0.210187431548637,0.301624457225832,0.00159600204579124,0.476922884535583,0.000721381188263247,0.00154566490179042,0.00265990350165322,0.026227632525164,0,0.14514258695249,0,0.0611410111282991,0.0194609566987883,0,0,0.0307669653447496,0,0.185188944681437,0.0635909601304877,0.185825201669822,0,0.145431221771634,0,0.0907866218222025,0,0.04151094…
TCGA-BT-A42C-01,0.0813313141383106,0.0736714862431138,0.122727158007459,0.102760841192209,0.0681677699760344,0.337065967489634,0,0.0311608152470294,0.106816896641092,0.0630318959721915,0.111036018949008,0.0070824534286021,0,0.129427664475724,0.0715942927493672,0,0,0.0234821032397778,0,0.00352758122523184,0,0.143838953625251,0,0.235695929666203,0,0.0558032906115418,0,0.0175021041689803,0,0.0055361…
TCGA-BT-A42E-01,0.0786825946422302,0.240388981586423,0.0938889378233149,0.179790054667989,0,0.608346451452833,0,0.0630410839485462,0.0304885020429649,0.183537530039153,0,0.0304807111591957,0.0235685740551861,0.0740145083969629,0.0744980506920415,0,0.00109089278487668,0.0525843490489794,0.0121156839901794,0.0306099557505838,0.156755588984115,0.164859953406674,0.0061610930113441,0.0343037857423836,…
TCGA-BT-A42F-01,0.0505253153597412,0.0919232966145539,0.200506843465383,0.170315179201155,0,0.559164555309248,0.00245516866642379,0.0104976517301002,0.0662403586973382,0.118017837863168,0,0.0365380322625878,0.0180007843669255,0.118393719760705,0.0273440691323813,0,0,0.0353202736539609,0.00212754367547247,0.235372372910022,0.0678691600945696,0.183343603758348,0,0,0,0.0759834737140051,0,0.002495949…
TCGA-C4-A0EZ-01,0.0142610479358704,0.218055971293794,0.0212491173054339,0.0440865179482258,0.064995078596257,0.280582824548471,0,0.00223495561712017,0.0240070802900554,0.117996385859042,0,0.0533760240475401,0,0.138881408752309,0.0941774896260273,0,0.0495522556230033,0,0.0137701386656493,0.141008182053799,0,0.320699729439949,0.0133809768129888,0.0067635769992388,0,0.0241517962132779,0,0,0,0.000351…
TCGA-C4-A0F0-01,0.0578754484311006,0.0726783124220928,0.235206746975861,0.101448535755764,0.0367451626763628,0.563354546054186,0.00947240245933468,0,0.0202814487691651,0.093284678651138,0,0.0413031447960604,0.0134901462939564,0.0391471812841264,0,0.0247694959960351,0,0.042823472736126,0.0217782853149616,0.0625480193602362,0.108536341942699,0.297145609597576,0.0559601698095385,0.00570874157512172,…
TCGA-C4-A0F1-01,0.0322421178700612,0.0964449469406691,0.204278703092774,0.100997339635301,0.0236529686762248,0.459487194826834,0.00340487172794313,0,0.266013790398043,0.0173040380514181,0,0.104260165954448,0,0.0827867632108848,0.021260154600113,0,0.0646342635281364,0,0.0314775477470451,0.0785384936477737,0.165948316227437,0.0645515196571476,0.0295585803601689,0.0129180933586885,0,0.05101855501186…
TCGA-C4-A0F6-01,0.0218967261589762,0.123004644790288,0.212473543678192,0.057418402916398,0.0427508743208064,0.369503625306817,0,0.00326188560668896,0.174169892383168,0.120146598427524,0,0.018651622748719,0,0.0485013441852981,0,0.0466583300619275,0,0.0183041655880264,0,0.151858620184245,0.0674435248696053,0.3154516687733,0.00142250676011797,0.00203081551906947,0,0.029026845021168,0,0.0030721798711…
TCGA-C4-A0F7-01,0.0723864023145552,0.114335543756081,0.178434730641863,0.0729910570542721,0.0187058803333364,0.434378476978706,0,0.010475970244526,0.0012240808778134,0.162928815676357,0.0371044861706412,0,0,0.0977242105850843,0.0187396389898002,0,0,0.00376488589740818,0.084858733771871,0.082404496170573,0.0405153857283221,0.171247840611213,0.0386721248080437,0.172917831146911,0.064230177157335,0,…
TCGA-CF-A1HR-01,0.0750665097121876,0.121399617679368,0.148805458186032,0.0756010616071214,0.0738188012050378,0.423660146268137,0,0.0197415195081475,0.162438436399894,0.221936422537315,0,0,0.0245110353918008,0.0509888929536909,0.0538639298747153,0,0,0.0816227044331383,0.0216008077486292,0,0.0154405809566923,0.210679561109529,0.000170691739259741,0.042913547396713,0.0940918699504747,0,0,0,0,0.00631…
TCGA-CF-A1HS-01,0.1110336565525,0.100937573506452,0.248591766358789,0.124233793548011,0.0709622965559858,0.629299206118134,0.00652304357622393,0,0.00855924819076384,0.0345376380856746,0,0.0364485030539214,0,0.060816593524491,0,0,0,0.0440920576844876,0.0363090647311201,0.0477646566026389,0.0632130670705834,0.323184263255784,0.227706535755729,0.0472360005592879,0,0.0620035100190221,0,0.001605817890…
TCGA-CF-A27C-01,0.0935028145048453,0.0772001293567125,0.128484903312392,0.0626499628372767,0,0.330905523521565,0,0.00134877520235468,0.0189584117069039,0.154419736711774,0,0.307496331452479,0,0.184805812943178,0.00159139427778802,0,0.00288082009057874,0.104172220502094,0.0595257490093767,0.00753736358439187,0,0.0643183358493376,0.0149251004654333,0.0213627310690127,0.0467719676901279,0,0.00988524…
TCGA-CF-A3MF-01,0.040732871757868,0.0670241708326992,0.0518028659163835,0.0325481522446398,0,0.180476529535857,0,0,0,0.168331926785152,0.119993884816408,0,0,0.21075498357308,0,0,0.0824079013045213,0,0.00351832605759889,0,0,0.222773887738463,0,0.0780255817647875,0,0.108497655424342,0,0.00569585253564712,0,0,0,0.00670636602519745,0.00478057209783684,0,0,0.00839650616771898,0,0,0.00328314158859384,0…
TCGA-CF-A3MG-01,0.0935998293794335,0.0783575095359031,0.146251236590404,0.073827116207674,0.0548651670560622,0.326995349858603,0,0,0.319096212626385,0,0.151423749552387,0,0,0.114478655488328,0,0,0.0895002190533622,0,0.029103186889006,0,0.00768777398161366,0.0919749406740865,0.0434475970773659,0.142901298399178,0,0.0103863662582877,0,0,0,0,0.0140008039348636,0,0.00664393416366596,0,0,0.00502291517…
TCGA-CF-A3MH-01,0.0898136412969237,0.115128436454943,0.0973894917459034,0.0659501480825015,0,0.332934975711032,0,0.00502690484218465,0.0686230758907999,0.0818709695173476,0.26085944218547,0,0,0.189919289556659,0,0,0,0,0.0195957269224436,0,0,0.169611068460045,0.0483467943011507,0.114203743762191,0,0.0389753074433216,0,0.00296767711838772,0,0.000556457636879516,0.00759629152419025,0.009062778719093…
TCGA-CF-A3MI-01,0.0347495078354241,0.104581758575381,0.101584918694166,0.0457269800663386,0,0.257448921243125,0,0.0269372367205816,0.0292947641571252,0.184788718770206,0.050009103496082,0.04077645405591,0,0,0.0327731003503109,0,0,0.0605696039104471,0.0119646894170292,0.0766272588523364,0,0.360589610540555,0,0.0793611825047186,0.0326568053238474,0.00884438402615769,0,0.0048070878746932,0,0.0027877…
TCGA-CF-A47S-01,0.0788378382838543,0.146130138350307,0.0841154191334409,0.0842869002031113,0,0.396413702695247,0.0447515663536598,0,0,0.0981298593749155,0.0994612305363388,0,0,0.114384886490041,0.0866711408690778,0,0,0.0336905017086641,0.0261493968278966,0,0.113873724209722,0.146088107265651,0,0.162565472508535,0,0.0742341138554984,0,0,0.0069017929878692,0,0,0.0151340395547741,0.0153393697564824,…
TCGA-CF-A47T-01,0.0537472387652042,0.110640208809178,0.0905730370852212,0.0381771200626143,0,0.301211622607582,0.0312579047574046,0,0.140318586713387,0.00271094320165572,0.338073317061384,0,0,0.209092261184376,0,0,0.0487144436813559,0,0.0117142546047417,0.0288173131248184,0,0.117405794358813,0.00251085740970332,0.039635996202472,0,0.029748327699888,0,0,0.00146153379107794,0,0.00656091179461844,0.…
TCGA-CF-A47V-01,0.0702226706180639,0.161278394472293,0.0808773040837344,0.0936542772422595,0,0.333318700851148,0.0267636682986841,0,0.0328490988407647,0.122917622450201,0,0,0,0.306177683241444,0.100380333496519,0,0,0.0577008908134017,0.062712493944656,0,0.0281432299765005,0.125396433757965,0.00570871399439232,0.0613037822199861,0.0699460489654857,0,0,0,0.00566050996516078,0,0.00694757718783426,0.…
TCGA-CF-A47W-01,0.079927327931282,0.118232376751698,0.0514208344806146,0.0518742606960716,0,0.315065836844751,0.00336507126906437,0.00288547914070345,0.0377459952006024,0.079007763373065,0,0.247060883426128,0,0.0228154374120168,0.046703830063747,0,0.123630020361602,0,0.0977637695767231,0,0.0252412676869653,0.177913277124791,0.0255603663205639,0,0.110306839044028,0,0,0,0.000203291064390065,0.00017…
TCGA-CF-A47X-01,0.0869595399770689,0.0771622827100931,0.0904406755148939,0.0672145374594661,0,0.292465570448772,0.00872323387192897,0.0382654734961054,0.0699066648922715,0.113106936924433,0,0.0409283399845557,0,0.123850351417479,0.0917854290066624,0,0,0.0494239694788574,0,0,0,0.282229461979968,0.0396962867460113,0.124534053283548,0.0114767031642489,0.00607309575393071,0,0,0.000879216527742917,0.0…
TCGA-CF-A47Y-01,0.0486978221499292,0.121197342263828,0.0676861653471493,0.0447664489994291,0,0.307948662923228,0,0.00384884225403085,0.0188964297184654,0,0,0.234088862648479,0,0.0548152420733021,0.18882397667721,0,0.0832439439093226,0,0,0.0189010411050454,0.0042689018973623,0.176605352230735,0.00461156584375473,0,0.21078388173038,0,0.0011119599119119,0,0,0.000269203128184686,0.00132169043467692,0…
TCGA-CF-A5U8-01,0.0677236025463238,0.123114879893596,0.0699513434249309,0.0572763762724051,0,0.327730061341234,0.0645854389297139,0,0.303689506850181,0.163375109656718,0.0537491963560464,0.0361847164340871,0,0.0481068719778008,0.00345892756538288,0,0,0.108823551566537,0,0.00835594862728892,0.0158177204466135,0.0957359998649316,0,0.00716418528209234,0.0384161835233795,0,0,0.0525366429192282,0.0047…
TCGA-CF-A5UA-01,0.0597534315071362,0.101697696754647,0.0813590972351691,0.0542232253506138,0,0.312432076421727,0,0.0111315152909435,0.0824725814175532,0.102549813205822,0,0.107051035797358,0,0.0914578202750883,0.0349825241162403,0,0.0226749893086359,0.0233116589095841,0.0257245039866198,0.171277265723778,0,0.209097256242736,0.0869940256263921,0,0,0.031275010099249,0,0,0,0.0010966304063227,0.00812…
TCGA-CF-A7I0-01,0.0466196659338543,0.114174521087383,0.108492198588412,0.0633201707404709,0,0.322541798236693,0,0,0.0444870806889475,0.261794137460368,0,0.12183960486735,0,0.0694060712282141,0.033963030000617,0,0,0.0443210492089445,0.0754038416948013,0,0.0106664494522269,0.178897601993531,0.0312202728951525,0.0331284877973536,0.0948723727124932,0,0,0,0,0,0.0113911311309081,0.067033648936531,0,0.0…
TCGA-CF-A8HX-01,0.0410204692331943,0.115317073247439,0.047848158873667,0.0453475070630334,0,0.25743667059753,0,0.0118095919993519,0,0.0873766260696934,0,0.14783572673871,0,0.15417741999371,0.0601843200130883,0,0,0.094072461098079,0.038431912143,0,0,0.239222960375552,0.059240738729018,0.0855825370957033,0,0.0202452076541176,0.00182049808997736,0,0,0.000919832397746175,0,0.00680564167407885,0,0.011…
TCGA-CF-A8HY-01,0.0600798309117164,0.0791779614385509,0.129971503059517,0.0582417889947722,0,0.287897298469434,0,0.0134382486221942,0.0431758266667747,0.205975339541389,0,0,0,0.19446332762529,0.121119257075916,0,0,0,0.0771141059408943,0,0.00820972156745512,0.0321081320468364,0.297853164023155,0,0.00654287689009479,0,0,0,0,0.000931079407197334,0.00299147040870804,0.0142711600617903,0,0,0,0.0134735…
TCGA-CF-A9FF-01,0.0721959739665448,0.158041768275807,0.0985865191203332,0.0537074124544424,0,0.30265072961403,0.304841725534569,0,0.099770995772492,0.125140118549188,0,0.114545009061419,0,0.0899727213651216,0.0457140857220305,0,0,0.0435040593419265,0.00950665457515634,0.00945211054715206,0.0258603849246354,0.0650883712987971,0,0.0294591148691624,0.0313115605874477,0.00583308785090278,0,0,0.072272…
TCGA-CF-A9FH-01,0.0536759867163526,0.133609486070478,0,0.197257696743543,0,0.222279692597927,0,0,0.172187669073573,0.0700277010264764,0.14436687376971,0,0,0.0413841732028502,0,0,0.021221546756662,0.0132926239940018,0.0218967467162804,0,0.0658816896677936,0.123704048596625,0,0.304902197160452,0.0211347300355742,0,0,0,0,0,0.0152866481923817,0.00621698891141635,0.0128167459483325,0,0,0.0036740453012…
TCGA-CF-A9FL-01,0.0735532542957763,0.118364756262147,0.10686396621894,0.0538600733444957,0.0103028398362737,0.369121592607984,0.0077287912719554,0,0.146929625557269,0.0238164450666042,0,0.021458453801692,0,0.0958059594323974,0.00709465161540503,0.0142045779975022,0,0.0200770143208964,0.0127484916946243,0.0564866684124027,0.015697355249316,0.353657192803512,0.0141698094434841,0.0119166630935459,0.…
TCGA-CF-A9FM-01,0.0790931677735721,0.154580193018348,0.0858703931556909,0.109186139099106,0.000650900382980891,0.459703882247378,0,0.00236299340343784,0,0.0521535243861305,0.0515824848081128,0.121571359808015,0,0.0378071198818978,0.0287645689531557,0,0,0.127963897176161,0.0249387126668733,0,0.0231433610910914,0.16535814065634,0.0359093362609048,0.123018831684413,0,0.180980368826061,0,0.0244453003…
TCGA-CU-A0YN-11,0.0105334029936686,0.156833664343505,0.206005616241937,0.110620156897117,0.0403355860869897,0.740975913141086,0.0612554905609629,0,0.0108263114126363,0.0291958466945662,0,0.152833827216027,0,0.0418224658570395,0.00364429678873493,0,0,0.0418522421423554,0.0463503083263809,0,0.00539729510002873,0.444352452685646,0,0,0.162469463215622,0,0,0,0.013273579928516,0,0.00234597598599942,0.0…
TCGA-CU-A0YN-01,0.0106796593912206,0.157969966144095,0.153839675761152,0.185859500692678,0.0149577572095237,0.575898774632936,0,0,0.0539699845533404,0.092517917183221,0,0.120385826621456,0,0.0677903560834068,0.0565914178373509,0,0,0.0250575865388906,0,0.272271573130337,0.00472348775507611,0.150399166284948,0.0229832132862371,0.0379780491996668,0,0.073996855322092,0,0.0213345662039777,0,0,0.032410…
TCGA-CU-A0YO-01,0.0681444583762106,0.141240117175794,0.183753773838315,0.138967008572634,0.0318412809528233,0.461226683887443,0,0.00662304137251375,0.0238367317885237,0.0680738210308338,0,0.326034904042728,0,0.0126077089181718,0.00411125912643503,0,0,0.027564237109392,0.0259216128159128,0,0.057896922586267,0.266456854527385,0.0319101185136932,0.0974009406205507,0.0439625729619537,0.00759927458563…
TCGA-CU-A0YR-11,0.0883650246517341,0.182165609773982,0.278857232869897,0.142682255936297,0.00924163863028602,0.740314219548852,0.178736845920454,0,0.0947753894134424,0.132317294487459,0,0.0953601009613961,0,0.108446661845876,0,0.0116994375137029,0,0.0778001570787906,0.00442331977559684,0,0.019885758414947,0.137643618650892,0,0,0.094841390786963,0.0440700251504799,0,0,0.115032920800699,0,0.0609963…
TCGA-CU-A0YR-01,0.00981479358567494,0.0610954133802809,0.244580035434267,0.106214172224783,0.0458441742065254,0.648624256252021,0.028355597910198,0,0.0504169797000938,0.0315797593419489,0,0.0203334025582408,0.0104805872027864,0.0544182513997372,0.0229895289051567,0,0,0.0358862356135725,0,0.346698934246328,0.0619755042120329,0.231801325928285,0.0402996320557418,0.00639169972887328,0,0.056763434718…
TCGA-CU-A3KJ-01,0.00886056560730753,0.158072127616015,0.186144134445764,0.187664021364605,0.00179826069876799,0.565605258712963,0.00172943870630202,0,0.00284664903784728,0.0766376086078539,0,0.255149617601594,0.0588592766697215,0.0335568984867421,0.00673298127201392,0,0.0208940963364756,0.0190253503186383,0.0169298457294717,0.0862510954302845,0.110359576062608,0.117065450056619,0.0189197773404866…
TCGA-CU-A3QU-01,0.0730081768113817,0.0515573941812335,0.152464643042334,0.0945928508616044,0.0103529511827797,0.415664668982923,0,0,0.0935102629322833,0.02960364751779,0,0,0,0.0297919384422227,0.0239060035744043,0.00725361574776397,0.0233291382930831,0,0.198979699361575,0.232062274321713,0,0.0878070997058204,0,0.0806799611700168,0,0.193076358933327,0,0,0,0,0.00999777413161463,0.00316511334770954,…
TCGA-CU-A3YL-01,0.0915342888623091,0.13640548510657,0.0699599339316761,0.0674094113875212,0.0232553725364662,0.328719981806358,0.0134171372424738,0,0.0915279408795479,0.228021998690689,0,0.0748470435778471,0,0.165554307581174,0.00208399882289606,0,0,0.0828266281055081,0.0239569617139697,0,0.0961388801449641,0.180447764881195,0.00876628864803139,0.0027642419689612,0.029646807742742,0,0,0,0.0036747…
TCGA-CU-A5W6-01,0.0357294299083297,0.0804468021668489,0.0927414956917837,0.0876915151933871,0.132798828160564,0.337580623784233,0.0318736488704515,0,0.0799794650044527,0.141906005110693,0,0.00511467259467467,0,0.103083561018258,0.0282268694074709,0,0,0.0236513815674214,0.0755569907269499,0.0409326430424608,0.0806152368862652,0.160054471320771,0.0396103620599946,0.045659828966231,0,0.1160353635458…
TCGA-CU-A72E-01,0.0423184415283703,0.104723378776345,0.109756979416555,0.0915281661609671,0.0626218306247509,0.380371212505153,0.000704851451143568,0,0.00439057785169424,0.0320060065722049,0,0.175920532588053,0,0.0493070508149712,0.00842898729035367,0,0.00725063288168185,0.051922598919145,0.0274703416991901,0.262156297447998,0.00792639818445007,0.344445618944993,0,0,0.0244244675133685,0,0,0.00364…
TCGA-DK-A1A3-01,0.100475950872724,0.0770424065916563,0.191381623846241,0.115478145155209,0.18909464376928,0.426563587246455,0.0470529519575464,0,0.034311619172922,0.0782213894408543,0,0.147439066479412,0,0.0479875702224451,0.0122811945166691,0,0,0.0486370922335354,0.018820374018876,0.0202467818859603,0.131366440002814,0.328568550186994,0.0025838019538191,0,0.0824831679281515,0,0,0,0.0224314003321…
TCGA-DK-A1A5-01,0.00703362546179684,0.145403233822307,0.221027266837298,0.0998212515824662,0.0380195670943286,0.597799494326896,0,0.0159921308587378,0.0280964692262697,0.119212799988139,0,0.0250255519766924,0,0.141133835168068,0.00911276260466768,0,0,0.0462926938845804,0.0147773622139129,0.177092611672535,0.0625690258105759,0.201539586490268,0.0649881425245966,0.0693406868585697,0.024826340722388…
TCGA-DK-A1A6-01,0,0.0949541706319773,0.208536812745016,0.159823939078187,0,0.487980127696822,0,0,0.000540794981457799,0.224339744382366,0,0,0.10085834641835,0.0799830524846186,0.00192767834439736,0,0,0.0801007942774748,0.0237903872069691,0,0,0.249579628916395,0,0.165629420998528,0,0.0710735601074033,0,0.00217659188203987,0,0,0.000201496834504716,0.0835875884513388,0,0,0.0375791903280884,0.0298011…
TCGA-DK-A1A7-01,0.0704661898305394,0.0747215421581104,0.0924348147131563,0.0490044292353626,0,0.229046488389804,0.203052774517273,0,0.143613493109382,0.100495066781249,0,0.150850535455961,0,0.105975683094465,0.0402285386606487,0,0,0.0577362198525733,0.00452531027037217,0,0.00302188727170118,0.110274705228892,0.000826518290438825,0.0250582361338976,0.0543410313331475,0,0,0,0.032469078367994,0,0.02…
TCGA-DK-A1AA-01,0.0719067247045903,0.116883309715265,0.147371521248805,0.0830702254923165,0.039409052858554,0.435555916479118,0,0.0207938503248497,0.126613383810724,0.00198300042789508,0,0.150408863260962,0,0.00398361321926795,0.0432816355110328,0,0,0.0826198099937559,0.0165842716453474,0,0,0.261632720141519,0.0640900524506747,0.0827536463131194,0.130862542216247,0,0,0.0143926106846051,0,0.003702…
TCGA-DK-A1AB-01,0.0746826513772339,0.179270666743875,0.116806088599875,0.186062768029597,0.0595888284940319,0.61921429050783,0,0.0233300770057404,0.0405605711199059,0.0383241732032476,0,0.119633207840073,0.00443046333407501,0.0454434674830791,0.00542920433935352,0,0,0.0507089512619628,0.00358318344334244,0.0916376148754419,0.239671005786192,0.216311172061413,0.0488839019773702,0,0.067367238812943…
TCGA-DK-A1AC-01,0.0172193262834362,0.0802741796473977,0.273911057245258,0.169318086143977,0.0882016812385641,0.514279616015961,0.03399587502471,0,0.0411335150713375,0.209904405955068,0,0.0497434673859284,0.0136918208406925,0.0823397049475871,0.0127750292837949,0.0364677015565127,0,0.0348615421190578,0,0.065871607628862,0.0598592658519276,0.159260791805424,0,0,0,0.194546006848809,0.005549265680289…
TCGA-DK-A1AD-01,0.0115978038348767,0.158843865849553,0.087945332182965,0.0537750345559862,0.127159407525475,0.272789529349107,0.0497542505788937,0,0.120514760627839,0.215244704018271,0,0,0.0186199575082934,0.0917664122229863,0.0611142557628556,0,0,0.0329102090111128,0.0470808564112452,0.012199338141422,0.195149364831247,0.11457343115391,0.0138184858313588,0.020122740670279,0,0.00713123323028636,0…
TCGA-DK-A1AE-01,0.0777353831351701,0.0661136878289202,0.169847206704767,0.135475585201148,0.000247174371805713,0.317822205424335,0,0,0.160135330864074,0.0420934247700343,0,0.0763235549067697,0.00295368807972338,0.156767786133077,0,0.0171053095042455,0,0.186368799342077,0.00804636959616418,0.00596046134966987,0.0697306332268567,0.179354903818773,0.0503230695341179,0.0154781709834323,0.029358497890…
TCGA-DK-A1AF-01,0.0736765466420443,0.172009861197019,0.36275487097672,0.221037496664941,0.183759916607798,0.65996589282572,0.00811211527650761,0.00716425554453799,0.0179368267942347,0.112984406772749,0,0.181888993476812,0,0.0208780385501954,0.00198451057498137,0.00952051328781782,0,0.0327776959616323,0.0571314905775377,0.165849193317492,0.0806051544055318,0.236123065562999,0.00321140807316464,0,0…
TCGA-DK-A1AG-01,0.0645820287218227,0.137354195023235,0.10565625407254,0.0935913547262693,0.00830173486235336,0.390167622582215,0,0,0.136383610522382,0.173391623716543,0,0.174409132724766,0,0.122177335166934,0.0142529091347355,0,0,0.0977694893577522,0.0341584617275073,0,0,0.115833760326461,0,0.0409221462429811,0.0278699162119569,0,0,0.0628316148679805,0,0,0.0352935389657657,0.0448705236981016,0,0.…
TCGA-DK-A2HX-01,0.0161654593472375,0.120991023296178,0.205741079319803,0.11773149072445,0.139451349295924,0.566472759508796,0.022739318689706,0,0.047653390294846,0.0516680722271956,0,0.128347211295468,0,0.0322780854489939,0.0342707285045326,0,0,0.0527384094560167,0.032336169207202,0,0.00209087542109045,0.366724146806103,0,0.0774443267667747,0.150052868733409,0,0,0.0016563971486628,0.0090172860484…
TCGA-DK-A2I1-01,0.0833642152375326,0.118294748741581,0.132877917488086,0.0721006018094494,0.114507970362198,0.390244555514207,0.079669749088666,0,0.147232554530515,0.0905914152758086,0,0.0335205710911372,0,0.0404237201809231,0.0516311982170464,0,0,0.0537067830244005,0.0204247135695941,0.0411036439618671,0.143463796649063,0.263439282227239,0.0113872883449862,0,0,0.0216364614340736,0,0.001768822404…
TCGA-DK-A2I2-01,0,0.258005025164742,0.18731795009592,0.208179311957535,0,0.870132212403763,0,0.0263082288607478,0.0116098593547,0,0,0.0906530177410082,0,0.0391394173504328,0.0451890038949744,0,0.0285941585100327,0,0,0.192512573382446,0.0378896182915582,0.190589948923991,0.0565266563211321,0,0,0.224012900023971,0.00218393460563109,0.0547906827393756,0,0.0149284730469916,0.00658795669497138,0,0,0.0…
TCGA-DK-A2I4-01,0.0350013393146324,0.256787038136944,0.439308643885679,0.399282545813721,0.234132218073488,1.06945185268073,0,0,0.0251179152145901,0.216248897695753,0,0.0655838023778016,0.0349786539379052,0.0511727322692653,0,0,0,0.0694246928630273,0.0143063830396409,0.051743158893369,0.0973136280070355,0.369241321025962,0,0,0.0020685229804999,0,0,0.00280029169515097,0,0,0.0381694889030073,0.3286…
TCGA-DK-A2I6-01,0.127356962717915,0.0786330630895662,0.134891021764774,0.0763238623964289,0,0.432235199181735,0,0,0.0234696938285231,0.117197343567381,0.0144430283718997,0.107342671973977,0.024972136280769,0.0465929813915129,0,0,0.0369159183107813,0,0.0232112494163191,0,0.0281706836235426,0.218339191982638,0,0.289334575449613,0,0.0700105258030427,0,0,0,0,0.00291187455290263,0.0145406226811063,0.0…
TCGA-DK-A3IK-01,0.0394092584412855,0.119679829427819,0.100302786197334,0.0542576676430923,0.0167185376398592,0.300454726220584,0.00341400390088237,0.10790371866094,0.156969180632909,0.0866532969607216,0,0,0,0.136751697940529,0.0315266712927746,0.0601261214194054,0,0.0121993855775703,0.00518570543482107,0.113123315421362,0.0410958350540962,0.165749301333246,0,0.017188468435975,0.062113297934767,0,…
TCGA-DK-A3IL-01,0.0568187930818613,0.135353747216501,0.078428805532807,0.0633694033956588,0,0.341165688381611,0.179195389021752,0.200723870301065,0.00251201543560461,0.0653915095926097,0,0,0,0.182145648187764,0.00807991472824621,0.00689349959690186,0,0.0549372730310543,0,0.0902880912345971,0.0283938598924945,0.0851524741777328,0,0.049817257459234,0.0464691973409441,0,0,0,0.0308126126793797,0.0345…
TCGA-DK-A3IM-01,0.0400429514176968,0.104557332484959,0.184717657067232,0.0722623192974562,0.029652162653325,0.488081414369985,0,0,0,0.020583988781101,0,0,0,0.123679760883186,0.0359649095456127,0,0,0,0,0.552884323581253,0.012795375405634,0.12095191545644,0,0.00512830803339326,0,0.12801141831338,0,0,0,0,0,0.00318002512145352,0,0,0,0.0191073144669126,0.00555622707834252,0,0,0,0,0.0854152252483,0.001…
TCGA-DK-A3IN-01,0.0571879907516486,0.112769245724544,0.26735962433348,0.160506481271583,0.135141901890496,0.702900084984521,0,0.00206544888094407,0.0565383933740963,0.0925344517299022,0,0.0791326595949418,0.0113016955845275,0.0287253385460855,0.0378110833781057,0,0,0.0465641590408877,0.0129448805172123,0.0499339190368599,0.0343002300280262,0.501980874343954,0.000467285264553026,0,0,0.026854831047…
TCGA-DK-A3IQ-01,0.0286223056142461,0.157585666501574,0.211896572949576,0.106242360179145,0.219649225319042,0.464256956192822,0.0218984512857616,0,0.0858710999214595,0.0382084774417188,0.0536703646303612,0.12835608580153,0,0,0,0,0,0.0297897125060679,0.0084442316328734,0.00789030227523204,0,0.414962682912543,0,0.0138578118502186,0.197050779742234,0,0,0,0.0059105777923215,0,0.023177338414247,0.01031…
TCGA-DK-A3IS-01,0.105574058820622,0.076067142695019,0.125336448905623,0.0696981902688772,0.013701177047584,0.346230614885459,0,0,0.0881093684891748,0.240936469164058,0,0,0,0.218193288029642,0,0,0,0.100538927116181,0.0309812226932592,0,0.0612278308323876,0.181562380406653,0.0191754656762346,0.0113391336835437,0.0462199283744283,0,0,0.00171598553443728,0,0,0.0100211219300714,0.0274029172640202,0,0,…
TCGA-DK-A3IT-01,0.0914068187502654,0.143315376721648,0.176258788729078,0.102835300367864,0.0754942012870851,0.438506478621394,0.0446356749420752,0.0362317579183605,0.153812131493698,0.0510754191194128,0,0.114182358443685,0,0.0431585955692153,0.0280786060651586,0,0,0.0171872840283344,0.0304950720204788,0.0173508769993021,0.0763856372216809,0.258401192517261,0,0.00988425203691762,0.119121141624419,…
TCGA-DK-A3IU-01,0.258925361736771,0.427848690763411,0.235291163437039,0.302975171373507,0,0.88456922550337,0.0676376126614449,0.0306319682828043,0.0217923859869446,0.206925528745183,0,0.10115867327922,0.0260683146519015,0.0368993687511689,0.0439370785376794,0.00514541872033521,0,0.0805822056314158,0,0.0866325856129753,0.136130748233757,0.11880084357511,0.00657172938829382,0,0.0110775083741385,0,0…
TCGA-DK-A3IV-01,0.169563429437628,0.321437401885835,0.111306262152564,0.202935197507572,0,0.56989377593341,0.020288570258414,0.0957424266113696,0,0.081063769426353,0,0.239448883392496,0,0.08142159508864,0.0955004757741672,0,0,0.0313349834754767,0,0.0131326690502513,0.117386126457361,0.13057938450536,0,0.0531293364088065,0.0409717795513048,0,0,0,0.0192523021673171,0.090852243597098,0,0.07692332007…
TCGA-DK-A3WW-01,0.0578549246880328,0.102566480494773,0.36889702083185,0.227803541300537,0,0.622642279151595,0.00378795452524676,0,0.00998715783896421,0.265178250649947,0,0.0240257349598025,0.1266953529048,0.0674898408075968,0,0,0.0280044187561443,0.0704120009997379,0.01083778685532,0,0.142675749144656,0.162310296179031,0.0225996230872635,0,0,0.0659958332914892,0,0,0.00192026397780216,0,0.00506288…
TCGA-DK-A3WX-01,0.000157658243396559,0.168811368628775,0.206289107987854,0.299111322167466,0.0666325398211593,0.562276145309972,0,0,0,0.10381558156289,0,0.128257135057809,0.0210711564804716,0.0564753513510836,0,0,0.0141837111890641,0.0637483665596118,0,0.122926139004944,0.154468052271201,0.0454464994711481,0.0283794582732554,0,0,0.0763073436996107,0,0.184921205078911,0,0,0,0.0727147315045968,0,0.…
TCGA-DK-A3WY-01,2.08682841368226,0.758633958039967,0,0.251227772348208,0,1.03593467600293,0.212516887793671,0.202669280595016,0.0313222326589912,0.0873476796781385,0,0.0535969748521077,0,0.153652751068466,0.0446170026329566,0,0,0.0289280197732477,0.00139575848792762,0.0525342908389831,0.0294474277608163,0.0848058994718073,0,0,0.0171657943878711,0,0,0,0.280984185968561,0.267963941219172,0.04141342…
TCGA-DK-A3X1-01,0.0741859110952054,0.106126301465305,0.105083022780434,0.0573845184014265,0.00740391649049706,0.329370603715128,0.00734294501460852,0,0.0558119195144254,0.128266422434621,0,0,0,0.16552226852804,0.0408927317371997,0.030861622179833,0.00628936957999234,0,0.0351692802301086,0.157202425045894,0.00911041135572765,0.194911293849327,0.00392836050738125,0.0222041862432888,0,0.142486763779…
TCGA-DK-A3X2-01,0.0597168619852268,0.12898046456524,0.0832121245781022,0.0762126789069843,0.0231883618422025,0.342565797926929,0,0,0.217797723526648,0.0620674740767039,0,0,0,0.0764276714702733,0,0,0,0.0866102766249417,0.015273690961812,0.0706124736845952,0,0.382822027029552,0,0.0506266293936005,0,0.0377620332318734,0,0,0,0,0.0230167528304752,0.00655925914423358,0,0,0,0.00807683751306433,0,0,0,0.0…
TCGA-DK-A6AV-01,0.0695008234259303,0.107210927588489,0.204943933022387,0.0708424672274051,0.0367001406436971,0.393998285517871,0.0257793963635404,0.0514776885054314,0.0704500136592754,0.131747765009489,0,0.0508570847111855,0,0.121581588697061,0.0378354638306591,0,0,0.0776471103735055,0.0145894932528289,0,0.0711919231702357,0.205241511608265,0,0.104988253153457,0.0366127076650655,0,0,0,0.007296576…
TCGA-DK-A6AW-01,0.0759646077588654,0.0995882476678423,0.0678595284145043,0.0710465736417797,0,0.343851488463051,0,0.0151133415038011,0.0453890045862303,0.197603623086624,0,0.026806446178359,0,0.142153850694372,0.0856260154547507,0,0,0.135925679997858,0.0282847390523774,0,0.00127901319845682,0.222895163088141,0,0.0483576482699544,0,0.0505654748890751,0,0,0,0.00183872516099924,0.00552213451568082,0…
TCGA-DK-A6B0-01,0.0764221430573288,0.132299764317738,0.056981498544418,0.0632803758524993,0,0.39937062481406,0,0.00429562954968562,0.0537111851491395,0.04609950036625,0,0.111815665147916,0,0.0342640619324598,0.0531453327348601,0,0,0.108751063575718,0.100725534377757,0,0,0.355248779396204,0.00297817442071168,0.0316964745181149,0,0.0972685988311834,0,0,0,0.000449992277139396,0.00562656025934216,0.0…
TCGA-DK-A6B1-01,0.0792388880913003,0.0928375942474476,0.125179032143479,0.081397567195226,0.0416129985309276,0.388283714955636,0.00440270693288536,0,0.0626443670026084,0.0813613429958674,0,0.12973212019187,0,0.0839049197767025,0.0423298287461285,0,0,0.00143335860590036,0.120712629626282,0.0315678603590435,0,0.156029680025907,0,0.151419390746569,0.119654127986866,0,0.0148076670033692,0,0.000779899…
TCGA-DK-A6B2-01,0.138575512303025,0.190182575293827,0.149746082885471,0.121236672722722,0.129170704990444,0.559557811761092,0.0294483292340768,0,0.0847543440811932,0.0888421116538875,0,0.0611813652725107,0,0.0288765164907431,0.0627595758871055,0.00225782255689967,0,0.036832255625105,0.0152122840558353,0.0228527120651513,0.133210403802679,0.347728542895508,0.0230789110250306,0.0116216704999979,0.0…
TCGA-DK-A6B5-01,0.0575577357370815,0.178630794066952,0.129142818889395,0.146410325175831,0.0685578998942984,0.574398410462194,0,0.00153847094649908,0,0.125959701547193,0,0.0146422911750302,0,0.187596600665151,0.0105313908566332,0,0,0.0274187061632981,0.0355239587663078,0.100817970880609,0.0747894917275742,0.107773001341462,0.193805190196045,0.0306313894079286,0.088433153445402,0,0.000538682880866…
TCGA-DK-A6B6-01,0.0848767509761577,0.130589444336773,0.137617818975043,0.0934783328197344,0.00955559237855278,0.415052991444554,0.0134256227523725,0,0.123514152592051,0.198161931568857,0,0,0.0530833841320891,0.147762210497632,0.0752223624868121,0.0234849320772763,0.0387083211839131,0.0253282676417799,0,0,0.105864134803849,0.138697831726412,0,0.0391561496983537,0.015657803259615,0,0,0.001932895578…
TCGA-DK-AA6L-01,0.0909849683883904,0.178381168843242,0.109050572326254,0.118378045656534,0.0707635213048285,0.554873044460132,0,0.0177029502297548,0,0.0649347380758617,0,0.0989658516348271,0,0.04982721333881,0.0358019886635504,0,0,0.0427221582146171,0,0.247531272322645,0.0210623170022952,0.282439061811094,0.110517221410839,0,0,0.0284952272957051,0,0,0,0.00741223302961502,0,0.0271882033270546,0,0.…
TCGA-DK-AA6M-01,0.0906466067503604,0.215533090273078,0.0877110030969113,0.133042925106759,0.101067193296195,0.657269674587677,0,0.0109120999297884,0.00381679084813779,0.0363136915330047,0,0.0854594142797676,0,0.0726306625287904,0.0815931182674429,0,0,0.0641462550597697,0.0498408158195255,0,0.0543939479890677,0.339245036450285,0.148470787874739,0,0.0502887587628454,0,0,0.00288862065683564,0,0.0060…
TCGA-DK-AA6P-01,0.0790606968728731,0.134380094278983,0.0766994948137918,0.062308077118487,0.0631035412217066,0.298198860253544,0,0.0203764024008261,0.0649940022387582,0.0329218512211873,0,0.190798593600618,0,0.122938102382095,0.0491401802697993,0,0.0365966391268012,0.0797199613486133,0.0492115498447254,0.120645383116021,0.00352812422237482,0.130667995276498,0,0.00902314491140855,0.089438070040273…
TCGA-DK-AA6Q-01,0.036792615060596,0.143578925970731,0.202873900191727,0.167353287361094,0.135149128294616,0.422736500548024,0.000615152549967257,0,0.00851350469733021,0.354373314328819,0,0,0.0568298853539485,0.153707203521892,0.00544860242419723,0,0,0.0517859962176465,0.0921612861637667,0,0.123082757291263,0.0825603320619185,0.0422662092348073,0,0.0125238907441204,0.0161318654103237,0,0,0.0002584…
TCGA-DK-AA6R-01,0,0.182357207198382,0.212028843330033,0.138926058718641,0,0.605802602175995,0.00421246005219831,0,0.0143019344177975,0.0912567627286136,0,0.119886787745944,0.0211552868189442,0.0723803239103849,0.0156291888175684,0,0.0677222814617082,0.0864365103261682,0.023084337902019,0.0682046154987759,0.100602788913903,0.0699824208562155,0.0274885778020116,0.109217884474631,0,0.103822077927451…
TCGA-DK-AA6S-01,0.0301687090081573,0.237936493511933,0.0843234175269005,0.14452355142089,0.0745386239003356,0.5334978810292,0.0040257123150242,0,0.0218901826326839,0.117283843071643,0,0.0925669081184921,0.00909300596306862,0.0984911643728289,0.0547955388066603,0,0,0.120811908476926,0.0264032230363088,0.0740422885910318,0.155220204268713,0.190744978948109,0.0264301606031987,0,0.00066844548810336,0…
TCGA-DK-AA6T-01,1.66270133107563,0.303982622403262,0,0.196172954277233,0,0.866513127667317,0.105886589006551,0.653109702557881,0,0.0456288579640813,0,0.0269968821879881,0.0364831923670556,0.0358242060385767,0.0006063590800883,0,0,0,0.0155648361097131,0,0,0.0501348844616281,0,0.0297644902264365,0,0,0,0,0.0430795698813445,0.265715284017559,0,0.0185639332961039,0,0.0109835823753271,0.014843052834328…
TCGA-DK-AA6U-01,0.0741237026357592,0.114032696833619,0.102552448552412,0.0743149345544203,0.0357701296834079,0.36471612300397,0.00345022835647886,0.0315618712153752,0.0364235652840113,0.152777689373941,0,0,0,0.0887356174992933,0.149602109029398,0,0,0.063927296858438,0.012300454989847,0.0435215707891068,0.0474739235534615,0.0902649217399539,0,0.0537593227836456,0.185629659510992,0,0,0.040571769016…
TCGA-DK-AA6W-01,0.0943324705103014,0.12723146016123,0.0933601845176641,0.0714469523019093,0.0743674956544648,0.458517348660828,0,0.0329355358133357,0,0,0,0.0226946603198976,0,0.0662201139160151,0.118183352045193,0,0.0240961841246379,0.0160402040569475,0,0.174460989645502,0.0485376105901377,0.351447642207343,0.139147344427191,0,0,0.00623636285379895,0,0,0,0.0128733534486478,0,0,0,0.008870552018672…
TCGA-DK-AA6X-01,0.165696961512016,0.139183446380311,0.13974408454205,0.142319061742578,0.180544485950445,0.496270561792146,0.0189626344538468,0.0321126288330141,0,0,0,0.0745086440738242,0,0.0917719419818817,0.0878166415123137,0,0,0.0125467225707017,0.0235960828403459,0.00681752018628997,0.0517547572063656,0.265716977677229,0.117197885736439,0.0435568442269612,0.163875540059734,0,0,0.0097651786410…
TCGA-DK-AA71-01,0.044387638664881,0.0917408532179929,0.0693775393836897,0.0777452248709665,0,0.333987586094764,0,0.0161865256872628,0.0129754552618468,0.174971947058916,0,0,0.00230857001080384,0.0687465485157248,0.026724524513187,0,0.0294811327502354,0,0.00716573581579639,0.144729318606979,0.047975482434193,0.135822678005174,0,0.0884736676077267,0.244438413732155,0,0,0,0,0.00262142619750047,0.002…
TCGA-DK-AA74-01,0.0856285884954593,0.232810359315137,0.155510132640553,0.187935877544714,0.170274898670721,0.699696059769964,0,0.00968846208658084,0.00642926736469446,0.139571286747304,0,0.0532052343558737,0,0.124054827180083,0.0283032493674784,0,0,0.0519938346937636,0.0103737726715936,0.0670660807126731,0.112650603706098,0.364901476102946,0.00648988907883743,0,0.0169204224516188,0,0,0.0083515934…
TCGA-DK-AA75-01,0.0324733307159677,0.13837258469068,0.0139953377323572,0.0415257352500535,0.0119210810207932,0.25335894918114,0.0125566563246258,0,0.107767135454771,0.154276484676921,0.204396168427352,0,0,0.0612949971877415,0.0406327480110768,0,0.042552788212896,0.0472692145801711,0.0611380751940883,0,0.0369888058263045,0.078711911865615,0,0.0449916042188707,0.107423410019567,0,0,0,0.001151036530…
TCGA-DK-AA76-01,0.0854304733666064,0.121590058227464,0.042872803400247,0.0661364862121006,0.0746983749391351,0.270061533374827,0,0.0484994154551512,0.123625738965391,0.0480611208554975,0.0793313752483321,0.0213890962485871,0,0.0203006286861756,0.076967217693318,0,0.010562276680408,0,0.00447244508835667,0.0872368164081663,0,0.264330754261106,0,0.135569040880916,0,0.0796540735285952,0,0,0,0.0035446…
TCGA-DK-AA77-01,0.122072536975667,0.102184621742187,0.105603167371121,0.106720239749211,0.0253133632144579,0.451237708917455,0,0,0.11617709838701,0.269376257622254,0,0.029401723714947,0.00562047162672325,0.145676701063467,0.00463429689326561,0,0,0.0477885282171129,0.0264037925993875,0,0.0923448221583788,0.181028082632527,0.00055180355048749,0.08099642153444,0,0,0,0,0,0,0.0296077835053176,0.068650…
TCGA-E5-A2PC-01,0.0542448223504977,0.116239284480361,0.11237326496158,0.124443101468996,0.028062920785811,0.409253806526579,0,0,0.0465621578810643,0.172953505875005,0,0.00112575313550061,0.00939614677412363,0.226856198608176,0.0126663657054609,0,0,0.123157663655265,0.0548093388521319,0,0.0958096035588788,0.20480095388267,0.0301677077707028,0.0108006632739003,0,0.0108939410271215,0,0,0,0,0.0077221…
TCGA-E5-A4TZ-01,0.0474719290547447,0.129291529766677,0.19138233492663,0.087675889683455,0.0411554960648732,0.452000548833956,0.0919046942116688,0,0.0144930864761311,0.0643440605611418,0,0,0,0.133963836178237,0.117788554740209,0,0.012932732038827,0.0186997840243058,0.0128328412589514,0.254482885691981,0,0.157027341796334,0,0.0911668135413195,0.0284990865931131,0,0.00186428288778021,0,0.01919419090…
TCGA-E5-A4U1-01,0.0553913172802083,0.103585039131384,0.0812383660276638,0.0497281938848239,0,0.257223019081046,0,0,0.0726292247833014,0.0897585866022622,0.284415930642047,0,0,0.118195009383721,0,0,0.0955717304196885,0.042252598005405,0.0161536841432465,0,0,0.176116991034087,0,0.0440767088005763,0.0608295361856651,0,0,0,0,0,0.00743253554635983,0.00918547440789586,0.0291057975732938,0,0,0.012095525…
TCGA-E7-A3X6-01,0.0592731358631061,0.186659114438905,0.122255550348711,0.182167460131367,0.0415323324112267,0.479424867204747,0,0,0.0173308512262983,0.19032636795774,0,0,0.0189135777261008,0.146259175407839,0.0516803237745748,0,0,0.115759907869931,0.0265348070461094,0.000997065201384498,0.145431080367432,0.196665547563765,0.0552864821456144,0.0166466300128764,0.0150146810154809,0,0,0.003153502684…
TCGA-E7-A3Y1-01,0.0672072765250256,0.115078386047674,0.0634987592138563,0.0482220930562711,0,0.300993838968988,0,0.0436616676988587,0.075660054520232,0.20638822850519,0,0.0874679564176293,0,0.11981628802731,0.0238329150453024,0,0.0375187341659741,0.0920169933440961,0.025650869493784,0,0.0101096685201104,0.210589664299663,0,0.00229417091769692,0.0649927890441526,0,0,0,0,0.00511223953799696,0.00885…
TCGA-E7-A4IJ-01,0.0571004803329154,0.0994578567091446,0.160685231597127,0.0825224888337251,0.00536429576560209,0.395094332242427,0.000752988682526218,0.00277056106415286,0.0518999591483025,0.245505882966046,0,0,0,0.261782023596305,0,0,0.0211734922173578,0.105731272379432,0.00378069909641944,0,0.023605513928939,0.1258730408819,0,0.0889102222230649,0,0.0682143438155547,0,0,0.000230762350177918,0.00…
TCGA-E7-A4XJ-01,0.0324972144206213,0.126221082791398,0.0677966061665998,0.0428670728811465,0,0.285049722018257,0.138136589852012,0,0.0881216910157142,0.00432719333716741,0.0631040337561981,0.0931309960685942,0,0.0314057281341762,0.0665085510696242,0,0.0371284626402233,0.0499858290055012,0.013264443390105,0,0,0.231197097789535,0.0383719847759613,0.119632710461503,0.00311201046649734,0.022572678237…
TCGA-E7-A519-01,0.153765849338832,0.254213952993855,0,0.0761254180021547,0,0.450506756564111,0,0.10863078258724,0.0334164980688647,0.166191503605113,0,0.0793250718624591,0,0.07925414064055,0.12623529502818,0,0,0.0112802327810781,0.108243816364775,0.100562052813629,0,0.0890135126903737,0,0.0750596009881194,0,0.022787492569619,0,0,0,0.0205286976027493,0.0063149428500864,0.0314063384282048,0,0.01499…
TCGA-E7-A541-01,0.0872533070174443,0.154618194623418,0.17235277025702,0.125846664748771,0.0926475271353608,0.444170310618243,0,0.00595809949790252,0.0250970879165501,0.355501326239043,0,0.0507790785994086,0,0.127315239502319,0.0064056428315297,0,0,0.113408183361917,0.012124332826943,0,0.0457660768805013,0.189592837243165,0.0208249328167425,0.0238531147077231,0.0207367565112497,0,0,0.0026372910650…
TCGA-E7-A5KE-01,0.0770714919172971,0.0923788363463487,0.0797231432763407,0.0498308498881276,0.0485889204433193,0.335618798207331,0.0183251602366712,0.00787834637130595,0.0561682942729258,0.070519326718071,0,0,0,0.0364267040345949,0.215775606602435,0,0.136129787010525,0,0.0397274282966587,0.024634075875037,0,0.155239010594922,0,0.191117892098177,0,0.0188371284283077,0.00246335945489027,0.026757880…
TCGA-E7-A5KF-01,0.0951672033824454,0.12469628267489,0.0748456542439795,0.0867666715668255,0,0.399632235747883,0,0.0103865476347732,0.125574607140605,0,0.181151361021205,0.0368511152528842,0,0.208080323855434,0.0586947625252048,0,0.0682536726573467,0,0.00261557209616901,0,0,0.0925049327588222,0,0.102954214429016,0,0.108651270323952,0,0.0042816203045866,0,0.000684776987840259,0.00827903594636955,0,…
TCGA-E7-A677-01,0.0501530595898782,0.1018275491454,0.252857662398916,0.164611033774935,0.0227025518307424,0.624869620648061,0,0.00758014343464278,0.0455958359653143,0.12919223398803,0.00649435119080088,0,0,0.185610123556412,0.110356460262618,0,0,0.0700019711684582,0.0164996594205737,0.022625726832122,0.0699712498298238,0.0755607876952892,0.0378608610126649,0.0867110591524292,0.135227486579704,0,0…
TCGA-E7-A678-01,0.0844520503517321,0.122512786320224,0.104388106792347,0.0582925887155846,0,0.359521052308495,0,0.00463753774672089,0.273699866885535,0.0644254193010607,0,0.408840456867547,0,0.0155515287681949,0.0403096678065788,0,0.0488868808282864,0.0383906278714367,0.0156203974999147,0,0.00376119003072506,0.059532427516133,0,0.0234731784191553,0.00287082045871238,0,0,0,0,0.000490248892816242,0…
TCGA-E7-A6MD-01,0.154912082566387,0.252792142047962,0.0788048237281951,0.0955905708240025,0.0817493674489694,0.443751312770564,0.0458263331328396,0.0860439453365868,0.0276729403691039,0.142437814625586,0,0.230189141562363,0,0.0799120004411264,0.0482285003592505,0,0,0.0142733577155996,0.0327893451121517,0,0.029910009799831,0.204371590915029,0.00233464421064389,0.0126471714333169,0.0433632049865713…
TCGA-E7-A6ME-01,0.257040549906961,0.0619945995372529,0.158600674807694,0.0811995985016004,0,0.64008219737273,0.0485976206500407,0,0.0921651525260214,0.277084666537319,0,0,0,0.157797313704746,0.0209165084091164,0,0,0.0878956996101883,0.00817680304637751,0,0.042692357912719,0.1703286697094,0,0.0548085365947477,0,0.0334427714758447,0,0.00609389982347918,0.0209596242403659,0,0.0397498260030514,0.1195…
TCGA-E7-A6MF-01,0.0413472439656479,0.1090102532128,0.208594510132422,0.0965836894103338,0.0624247504754447,0.416600165774522,0.0377454666054539,0,0,0.115570487629502,0,0.273329908997152,0,0.0768459301025434,0,0,0.0156901368570081,0.0397210360000352,0.105201578223865,0,0.000606194738485081,0.252673082874074,0.0092933907971726,0.0379208884736981,0.0328379888549476,0,0,0.0025639098460626,0.008680825…
TCGA-E7-A7DU-01,0.0883878282978076,0.121099324444186,0.057944642987266,0.0616050357807933,0,0.337114218643529,0,0,0,0.0917125362401717,0,0.273168639252138,0,0.0487428279091025,0.0628581569747231,0,0.057893887721266,0,0.0465804491019779,0,0.00822291186103135,0.295956575491293,0,0.0793041806610982,0.0348000596011553,0,0,0.000759775186043012,0,0,0,0.0106425613247487,0,0.0316991996342332,0,0.00565624…
TCGA-E7-A7DV-01,0,0.178148475170206,0.24749073827027,0.161706164132146,0.369804587765143,0.953365054377603,0,0.009425151067578,0,0.0385606666286159,0,0.0331894276361451,0.00280400146573745,0,0.0156334080284214,0,0,0.0082665469286756,0.0349477258327792,0.0478180703463231,0.02841623597588,0.735804116357389,0,0,0,0.0417506697042069,0,0.00338398002824829,0,0.00434740932938392,0,0.0177863464093617,0,0…
TCGA-E7-A7PW-01,0.0370610810843576,0.120210831685508,0.0728333270745546,0.0458494649319109,0.00446563752326607,0.299219292184277,0,0.00394373926871104,0.105508405411914,0.290509220832372,0,0,0,0.205500049778206,0,0,0,0.0507292678807447,0.0419347480950975,0,0.0873793022992135,0.0998439417926543,0.00113961037148605,0.0693887820156587,0,0.0441229322539415,0,0,0,0.000607297307639425,0.01624726336458,…
TCGA-E7-A7XN-01,0,0.217012099388247,0.217960714477874,0.34063131313491,0,0.498570223987161,0,0,0.0206462969492164,0.315579804110013,0,0,0.127921682655715,0.107568941560539,0.0113565256696194,0,0,0.123912600128034,0.0152716270959659,0,0.144066780132697,0.105981347559467,0.00665275215854119,0.00231576970149202,0,0.0161669999243495,0,0.00255887235435134,0,0,0.0118354998774071,0.180906277868776,0,0,0…
TCGA-E7-A85H-01,0.0679471482877492,0.13226240371837,0.0849978173153463,0.0676186859077875,0.0677161429553011,0.345095585494868,0.0458328275149388,0,0.0336539876509877,0.151294452117055,0,0,0.0115163533897359,0.0887606647354459,0.146770997221185,0,0,0.0769330984933863,0.011314866155579,0.0379425066321227,0.123938483529232,0.198479101637591,0.0441102192651534,0,0,0.0294524416575871,0,0,0.0147075060…
TCGA-E7-A8O7-01,0.139978816018265,0.17411020269738,0.125979598699499,0.173284986100965,0,0.536108388759815,0,0.0380285137922032,0.0708747887282748,0.13041666755666,0.0298967262042866,0,0,0.128683285630946,0.0709931294164708,0,0,0,0.0212146222377983,0,0.0334470355904284,0.140900940408197,0.0965672625911227,0.0912918330166751,0,0.118269587442645,0,0.0294156073842917,0,0.0162865324058079,0.030353659…
TCGA-E7-A8O8-01,0.0459858271281653,0.0745267179305505,0.100623178160864,0.0374016461123586,0,0.257121054498193,0,0.00170525014754947,0.0353447790263292,0.120423368773236,0,0.0649785354864022,0,0.147029258143422,0.0801673642860251,0.0096251165015302,0,0.00108265775065741,0,0.195792946366913,0,0.217193423021466,0.0400512354918258,0.0652083051051018,0.00893021138813548,0,0.0124675485114061,0,0,0.000…
TCGA-E7-A97P-01,0,0.171882338871904,0.262030823313682,0.271533358315046,0,0.587523981701743,0.0128428023581257,0,0.0534386650044369,0.284340925172474,0,0,0.0937666220306846,0.158079329757203,0,0,0,0.107343650080293,0.0168335912361715,0,0.138892897022973,0.0711878009011993,0.0114178652181718,0.0106512149286412,0,0.0342385560462997,0.00696608024332696,0,0.00996020151021556,0,0.0414442157590577,0.22…
TCGA-E7-A97Q-01,0.0313599784307282,0.144468793816727,0.125138939736213,0.0772614856344497,0.102728815386402,0.360571832677348,0.00331257123159091,0.00940131279556471,0.0955869656762291,0.166078538748729,0,0.0835673535659217,0,0.0364375842950402,0.0288588572282604,0,0,0.0840764580707178,0.0117876113902759,0,0.111664817979631,0.288727851231188,0,0.0152185555574378,0.0652815222294138,0,0,0,0.0012637…
TCGA-FD-A3B3-01,0.0606308063568045,0.25167587111169,0.204186854246543,0.289662998001715,0.024825225054399,0.708946314108545,0,0.0185185193448866,0.070089868323885,0.138728854010222,0,0.0330683768863921,0.0252289622635508,0.109494349547432,0.00188666896726087,0,0,0.0775196788184241,0.00490155918616469,0.088718560157281,0.18924651561858,0.20380399913348,0,0,0,0.0293656375973065,0,0.0094284501451344…
TCGA-FD-A3B4-01,0.125766697230927,0.235326680876572,0.161513065602758,0.178409559272179,0.100465424085228,0.521329319924649,0.0885059172385274,0.0424598794700108,0.0583178007825653,0.0690317724639435,0,0.0749818917389637,0.00202879659615157,0.08189235174039,0.00573465476906683,0,0,0.0597759157528268,0.00120674397652161,0.106692099564642,0.119570245220876,0.179286745673536,0,0.0174095974090983,0.0…
TCGA-FD-A3B5-01,0.0523542778278124,0.0927825749751611,0.193509679887711,0.0982786429803742,0.0467149649411939,0.449916804103696,0,0,0.156291895999543,0.00709030609078979,0,0.0331740976428213,0,0.0980265695938927,0,0,0.0284129158216914,0,0.0458138316051473,0.225718499360347,0.0372237991112391,0.219262657827827,0,0.0136612054058841,0,0.124509564824603,0.0108146567162148,0,0,0,0.0406414549313263,0.0…
TCGA-FD-A3B6-01,0.101320440512754,0.150712431508039,0.260590248716208,0.194907563322988,0.0900909466561635,0.729019791073486,0.011021432578757,0,0,0.187495917482438,0,0.0561856835624745,0.0367574522368691,0.0979374043606451,0,0,0,0.0727705450993513,0.0161750787689914,0.0378624407359291,0.0955174761981154,0.355509319491224,0,0,0,0.0311102258538486,0,0.00165702363135658,0.00762361961773515,0,0,0.12…
TCGA-FD-A3B7-01,0.103290353233749,0.136747676728287,0.462452435904471,0.242428515342007,0.166852886320632,0.817030134578419,0,0.00764405211179602,0.0296693541557288,0.246174251541006,0,0.013857321261038,0.0330758860486175,0.0464820052852717,0.0100543138031957,0.0268525715376123,0,0.018799714398503,0,0.154267259112264,0.104963579143963,0.232020840105223,0,0,0,0.0708614619487415,0,0.005277389547038…
TCGA-FD-A3B8-01,0.140983505837596,0.336813858814463,0.276007434460101,0.371250968402849,0.210375966527514,0.957317285322166,0.0399081167219094,0,0.00140449840819309,0.134177403682255,0,0.221723079804925,0.0031467021277857,0.0387334813128729,0.00276325930019903,0,0,0.0257295956247235,0.023893147653851,0.0608100264662281,0.186954600422377,0.199403948172135,0,0,0.0509970070928539,0,0,0.0103551332096…
TCGA-FD-A3N5-01,0.0251559998302441,0.18548017535775,0.131714723110696,0.121969727921092,0.00837674303716444,0.567100742842578,0,0,0,0.0798188852995671,0,0,0.0216571228853791,0.065349395567719,0.00797090983414249,0,0,0.0954553638252631,0,0.41889345757527,0.0249685680492578,0.158214751661109,0.00792501505796825,0,0,0.107045524089948,0,0.0127010061543761,0,0,0,0.0274177406505241,0,0,0.00743920910796…
TCGA-FD-A3N6-01,0.0466411247594013,0.135337591004326,0.144949654643255,0.130239381297691,0,0.432486270011469,0.0134451622020313,0,0.222554810388122,0.0989226146114252,0,0,0,0.0998714204470027,0.0145712341989773,0,0,0.06490726076747,0.00487365057620214,0.0746955770946904,0.225557148191781,0.0426217823656595,0.0236179307010475,0,0,0.10680532136789,0,0.00755608708770124,0.00330987670839996,0,0.05478…
TCGA-FD-A3NA-01,0.0391461282923988,0.0787892972996578,0.250259695118138,0.141667773467806,0.0773454342671138,0.543151295870271,0,0.00154159378539243,0.00656815367181793,0.169023117669886,0,0,0.0747912217319147,0.0843549439823881,0.019816568792636,0,0.0126562188488095,0.031287414810977,0.00571587278127919,0.123945442129403,0.0621935566845334,0.336372018934768,0,0.0406681585626082,0,0.0135150108622…
TCGA-FD-A3SJ-01,0.0737814154000724,0.137380100621291,0.107678545871296,0.0670015769537344,0.0644363575467399,0.389378698419469,0.130471852395171,0,0.0751898085459853,0.032526546906771,0.0464438127705084,0.0410885944242622,0,0.046821132567646,0,0,0,0.0368662497330165,0.0445356215275141,0.0787181704066723,0.0609319043445911,0.309183584092848,0.00440942270612004,0,0.0928132995788934,0,0,0,0.04660152…
TCGA-FD-A3SL-01,0.012876125604187,0.132338206378126,0.238520869327628,0.121511095066057,0.172016051397572,0.488577461452974,0.0602658582848828,0,0.00431245595423318,0.045085916974776,0,0.0378082969120464,0,0.0702191707629396,0,0,0,0.0497834092520051,0.00132368808050014,0.112924438233022,0.146018424206641,0.357727137698529,0.0197758111936396,0,0.0947553924467855,0,0,0,0.0260584384227415,0,0.001864…
TCGA-FD-A3SM-01,0.0600309583627595,0.10075583227385,0.140187204665807,0.0828605975763595,0.14501253423041,0.436401698690782,0,0.0208538789368988,0.100804264559504,0.0214889754185274,0,0.0463583883029076,0,0.0494272947928295,0,0.00727355680703443,0,0.025142130911619,0,0.397292293591518,0.070194398453219,0.203194931639622,0,0,0.0579698865863209,0,0,0,0,0.00462925907660818,0.0223770866842046,0.00477…
TCGA-FD-A3SN-01,0.0224797690088538,0.122837394531859,0.18113629781578,0.110414560755276,0.0485335592389231,0.499700145055019,0,0.00293509791256841,0.0710823629081306,0.174195250632956,0,0,0.0631726651463357,0.070881060981872,0,0,0,0.100746409043252,0.00478122350133873,0.0751082778650859,0.0698031942671146,0.293332685134669,0,0.0312129108124537,0,0.0423457200448571,0,0.000403141749366891,0,0.00094…
TCGA-FD-A3SO-01,0.0239507647041408,0.137905146639885,0.209050927213304,0.191083392271226,0.0541783790417668,0.640425059299248,0.0166135598616092,0,0.0287428308033693,0.0548372707068141,0,0.105339879577168,0,0.0681227110985815,0.0212309344449137,0,0.0024090047426921,0.0306966918011406,0.0883742616740684,0.0710763932138732,0.116522147709155,0.353697350718469,0,0,0,0.0285035063657475,0,0.01383345728…
TCGA-FD-A3SP-01,0.0534392864160281,0.211353302501888,0.215969999334958,0.233286395414326,0.207504611854585,0.823993436571939,0,0.00119220075005891,0.0079777549164347,0.0825870539384464,0,0.140087431610832,0,0.0320310745742564,0.0300255313160695,0,0,0.0105056265281912,0,0.223539523492306,0.0844170261361572,0.318149564787264,0.0249815939216321,0,0,0.0431027033174687,0,0.00140291471088201,0,0.001120…
TCGA-FD-A3SQ-01,0.0960500451640928,0.18097227741096,0.108814463222489,0.147869488559598,0.101237963474108,0.57698208670273,0.0140323946855609,0.0242010123282478,0.167726071222201,0.0495593118326671,0,0.0207800751840668,0,0.033179090112216,0.0522470397219627,0,0.0120535328133171,0.00901064200780882,0,0.190638853352848,0.0660014364365445,0.272324672684519,0.00545354650218111,0.00897258245489427,0.0…
TCGA-FD-A3SR-01,0.0644279171915734,0.233506088737617,0.0498937265598582,0.209650654059529,0.167616362034243,0.476170474921797,0.00750874882757884,0,0.0273498679058799,0.124523908111508,0,0.138788708565775,0,0.0373749814805545,0.0769844235565575,0.000301196061131804,0,0.0461726784655528,0.039516187141937,0,0.195912447992124,0.204986308844189,0.00334424706386829,0,0.097236295983344,0,0,0,0.00566909…
TCGA-FD-A3SS-01,0.0512499307887421,0.0794313885996066,0.133333945832663,0.101137387901599,0.0265426286749984,0.44412903773299,0,0,0.0763237018315659,0.081435341297227,0,0,0,0.184171033224762,0,0,0,0.0579609142325154,0,0.0654685932432886,0.0487798467310918,0.312018478031609,0,0.0617454822930943,0,0.105277000777891,0,0.00681960833695466,0,0,0.0136178828428317,0.0145299154841702,0,0,0,0.032860297565…
TCGA-FD-A43N-01,0.0241442185804666,0.104431815589583,0.130050773830508,0.0904148448370149,0,0.35882149229373,0.0187825368112724,0,0.0882872249073092,0.0600391142485277,0,0.124027529790744,0,0.0335681321083473,0.0495392503335344,0,0.0439581882641938,0.0156028350142156,0.0197985890686281,0.0513939580490366,0.0518141721533815,0.207523038821545,0,0.100115212393247,0,0.114462296917397,0,0.021087921118…
TCGA-FD-A43P-01,0.118155630280712,0.289928955017103,0.276393156018898,0.15766408512203,0.0310341485848386,0.600159985883004,0.0128328870834966,0.0148215642472707,0.0575341380034989,0.213963925827009,0,0.0275950731075619,0.0478143927425769,0.0991856105783304,0.0631995657154498,0,0,0.117255058663972,0.0245727230528794,0.0499509065384377,0.146414993685224,0.0907117710158307,0.00420495610889621,0,0,0…
TCGA-FD-A43S-01,0.244262697770477,0.462953052900316,0,0.128723186726882,0.0497474161404632,0.478255535636245,0.0798919777460062,0.0968309836645956,0.0092876922680257,0.232595391463449,0,0.0394653444775208,0,0.146874664471924,0.0332876793449196,0,0,0.083973075404554,0.021109805160768,0.00252409709051271,0.00883360112730999,0.181828307549931,0,0,0.063497380230483,0,0,0,0.0689571025803421,0.08357765…
TCGA-FD-A43U-01,0.0397833375526161,0.26986255027777,0.131399714118489,0.119347985908964,0.102152052784562,0.609819202903789,0,0.021089465739236,0.0315743989290621,0.121603960119648,0,0.0516689135063331,0,0.0417712213813054,0.0325844148971199,0,0,0.026074146000794,0.0343370685300404,0.409973414617125,0.0192539141679321,0.202217948258374,0,0,0.00785113385303022,0,0,0,0,0.0134944945654072,0.02020347…
TCGA-FD-A43X-01,0.0492549956869741,0.124892001901649,0.0634522550124998,0.0435667980763871,0,0.350016721411755,0,0.00201315717880271,0.0294271782503618,0.134881566582313,0,0.13939237101326,0,0.0733241643836064,0.0302909728273052,0,0,0.0392393170411102,0.027290838447905,0.146598400097723,0.0153905498457067,0.126137249587039,0.00800393968710808,0,0.223505206655916,0,0.0045050884018433,0,0,0.0001411…
TCGA-FD-A43Y-01,0.00612018976865308,0.185323931461063,0.122030274023926,0.120207947848357,0.0425238681212595,0.648319749118459,0,0,0.00356327628129682,0.0980709622286482,0,0,0.00082110429424416,0.109983636631143,0.00303422390871043,0,0,0.0825806841615936,0.0705262650036085,0.0791506962948242,0.200277020268266,0.249955924224765,0.0715621945922521,0.0111958574537933,0,0.0192781546568545,0,0,0,0,0.0…
TCGA-FD-A5BR-01,0.120883029436355,0.1828299699457,0.124335670574586,0.102056263052891,0.0286395617676473,0.43466830535341,0.10159136237452,0,0.134050854817012,0.0475996186261093,0,0.246889320146029,0.000258913040611588,0.105388998580238,0.06750159934708,0,0.0195068232000121,0,0.03059465615175,0.0422999491579097,0.00987569408762511,0.143548706969871,0,0.0181368969308405,0.00827825435099733,0.02247…
TCGA-FD-A5BS-01,0.42273829067728,0.196798479289627,0.437035754960319,0.237444280352384,0.0417954290050722,0.886644111002488,0,0.0920645403740848,0.047932074173683,0.171300681835229,0,0.0168502663820575,0.0284686682250468,0.0884485431290199,0.0351739480752832,0.0118727593738151,0,0.107448570026249,0.012401763771562,0.0859992982571221,0.139666747650956,0.112659720313579,0.0145434066839431,0,0.03516…
TCGA-FD-A5BT-01,0.0427446963713558,0.223066842540666,0.170131675340599,0.151406259379442,0.078179498742569,0.654551717995092,0,0.0604983895754443,0,0.25834241670129,0,0,0.0211118606237801,0.0611223438572224,0.034932234488132,0,0,0.115746079967085,0.0301353050665113,0,0.0798069236270114,0.287261543120911,0.00696648253773678,0,0,0.0396766918569514,0,0.00439972857792344,0,0.036658877734495,0,0.15654…
TCGA-FD-A5BU-01,0.0954252856877568,0.219971396410949,0.0952867863345817,0.154216360851973,0.074356730408037,0.6634723153041,0.045025428322085,0.00518401011007922,0.0329456104233266,0.042601173215404,0,0.107511455653232,0.00301350697197365,0.0654770071696504,0.0536168709151787,0,0.0250709026993307,0.0634538417414418,0.0306845017811076,0.068106594206026,0.110058739702045,0.215164359351585,0.1019943…
TCGA-FD-A5BV-01,0.075815257743069,0.0929946516515254,0.115589108864023,0.0584466227233879,0.00728342474518973,0.351049921506727,0,0,0.0529272183894015,0.114479780964336,0.0982418218186971,0.0498370693642629,0,0.0916670608225273,0.0477780682422873,0,0,0.026199398188623,0.0254303138863404,0,0,0.376427542829966,0,0.0512232862690058,0,0.0556416942228673,0.0101467450016851,0,0,0,0.00862718243005412,0.…
TCGA-FD-A5BX-01,0,0,0.771949452923402,0.119715159499705,0.172095257217985,0.715300640253757,0,0.00445638168536981,0,0.0358584518276902,0,0.0284435321062847,0,0.018590511628847,0.026423664469257,0.0452514543336143,0,0.0337135896092058,0.0270649681497019,0.197981657760424,0.0299473353145443,0.468259449416851,0.0289747329927793,0,0,0.0550342707054307,0,0,0,0.00163299902271387,0,0.0131399913483378,0,…
TCGA-FD-A5BY-01,0.060420212755418,0.136932355985625,0.157285366622636,0.107312665621108,0.0890496254396274,0.477138222770617,0,0,0.00667527585999224,0.0559391942860875,0,0.125845392598375,0,0.0298253368413642,8.00340315382755e-06,0,0,0.0753847907882368,0,0.187300604376203,0.0467955598215663,0.27105775023521,0.0317704312014165,0.0437574183217395,0.11917082069436,0,0,0.0064694215722951,0,0,0.002642…
TCGA-FD-A5BZ-01,0.0228823787939208,0.143179496928677,0.187853734931634,0.110632162233449,0.128420438918633,0.405084016568009,0.0286469498162079,0,0.104671907403026,0.00507415000808532,0,0.0301051947099542,0,0.00829482886660688,0.02146315726763,0,0,0.0202751206734966,0,0.373132606467505,0.0950319174189505,0.207588453823781,0,0,0.105715713544757,0,0,0,0.0114358545121904,0,0.0417849967362747,0.00202…
TCGA-FD-A5C0-01,0.0517558680533886,0.0987210823261146,0.200835941588334,0.108732287773716,0.0669365402016814,0.422755302907918,0.00334944856207974,0.0298777110886733,0.023687114472913,0.144264868873187,0,0.133662325448631,0,0.100124439389825,0.0203725007875074,0,0,0,0.0821612046789486,0.0117456768797903,0.025341079722693,0.199928045768026,0.0281804004136612,0.0376891302202981,0,0.15256506575474,0…
TCGA-FD-A5C1-01,0.182698036007183,0.128412599694862,0.110745161913536,0.179725191564342,0,0.75652908899593,0,0.0335735158992954,0.0522550057565598,0.147271200364517,0,0,0.0441116495370056,0.0810582358289121,0,0,0,0.0467422854312877,0.0144366263416983,0.0242192581290393,0.101009244903138,0.293553006482771,0.0062547442627913,0.0676258922842457,0,0.0803189575542579,0,0.00757037722448075,0,0.01944877…
TCGA-FD-A62N-01,0.0406443542060697,0.307954273975394,0.300961372018626,0.296704609433535,0,1.01214454174167,0,0.0400661578844896,0,0.207623393402871,0,0.0524452849901389,0.0585318363085682,0.085981183658577,0.029229282536177,0.041076409985658,0,0.0573029232952004,0,0,0.15514711665669,0.208194182444374,0.0237234300691843,0,0,0.031568950118316,0,0.00910984864975541,0,0.0497044504876624,0,0.25756916…
TCGA-FD-A62O-01,0,0.0844880834744012,0.227952885193366,0.0675835737732056,0,0.373367850034967,0,0.0326446420592162,0.192163154146654,0.0556526100364668,0.0826466748824453,0,0,0.0540945992982875,0.0290855012339685,0.00977375170882346,0.0106921309020072,0,0.0496056744433534,0.0468507346424815,0,0.114608987763881,0,0.0748976709150263,0,0.21083929117391,0,0.0364445767934787,0,0.00504956939089028,0.02…
TCGA-FD-A62P-01,0.0496478876122027,0.128413497549758,0.18662651109167,0.110853332019336,0.0926056211803584,0.591211037944819,0.0143090631899237,0,0.0154683154050504,0.171557115595722,0,0,0.0474412406877273,0.097171861039554,0,0,0,0.0217338187811427,0,0.251114061450031,0.0540901892079988,0.262329754487818,0.00653418665078579,0,0,0.0539281333434995,0,0.00432226016074702,0.0079246412418964,0,0.00856…
TCGA-FD-A62S-01,0.104825794771513,0.23497004661004,0.143129693510635,0.186379900466564,0.15178919201894,0.688142888130467,0.00577334711533921,0.00150932616357489,0.0238903518107677,0.0332367339673836,0,0.13313836784849,0,0.0390226772616916,0.0546140605129972,0,0.00681877590613192,0,0,0.146003041051679,0.077369734327988,0.346598154179046,0.0809714271801409,0,0.0460438035360473,0,0,0.00501019913872…
TCGA-FD-A6TA-01,0.137533024944392,0.164990396465395,0.13382462628528,0.128937671987637,0.0968089001565397,0.460970049458299,0,0.0417941972209361,0.166255568495165,0.0786095482678677,0,0.0685952122514178,0,0.0646077298402624,0.0763175663844353,0,0,0.03228892312957,0.0115650769641427,0.0585198653744039,0.0818214506744525,0.273953015891105,0.0123467539369986,0,0.0203430877183586,0,0,0.01298200385088…
TCGA-FD-A6TB-01,0.293000967445325,0.265226584669349,0.249758159315392,0.174618880079887,0.160045364616254,0.645133097315414,0.20792336782038,0,0.0431094404427972,0.190840880858498,0,0,8.55695850921229e-05,0.114353274594788,0.0242963582616724,0,0,0.0820321413082795,0.0136228739204555,0.0359720821358723,0.0660967160154038,0.214413024220302,0,0,0.00420786508424114,0.00304640575221837,0,0,0.260670158…
TCGA-FD-A6TC-01,0.0463963890903346,0.124395300769983,0.164246733408835,0.113690381053214,0.118553966715437,0.405564080190541,0,0.00992093566102087,0.0803633971039239,0.0257402656912557,0.0114530340523206,0.00175802616337098,0,0.0371044242388159,0.00616512295302648,0,0,0.0288263191045396,0,0.309568231345598,0,0.347475815697551,0,0.025796241154952,0,0.104074289538129,0,0.0117538972954967,0,0.003009…
TCGA-FD-A6TD-01,0.123974764248299,0.122412936110716,0.180877574597406,0.18394603817946,0.0442379344487517,0.723744391800074,0,0.0153335219172207,0.0524780842629047,0.10853414787942,0,0.0166389399212501,0.0120173353727941,0.0664291669932841,0.0175864249972813,0,0,0.114869299520452,0.0342894810785632,0.015713753446653,0.103706417400284,0.358581071593085,0.0578766824134343,0,0.00410582248904102,0.01…
TCGA-FD-A6TE-01,0.156404006214133,0.079242939505609,0.10778272217621,0.0605617265993731,0.00358244734646889,0.499769043377237,0,0.013646838947063,0.128991053875552,0.153927309127025,0,0.0344111474453636,0,0.244704460831586,0.009011489098645,0.114141829903714,0,0,0,0.100408024835678,0.0370857828945001,0.0453749420202855,0.00842585542554968,0.0272997286432042,0.072335523084776,0,0.0102360138670581,…
TCGA-FD-A6TF-01,0.0558875351625452,0.136095438968471,0.175486641144791,0.119586673599031,0.0748461522245435,0.512128481981438,0.0440480385182497,0.0222505990884785,0.0398859222006989,0.120803185517974,0,0.0268931124131744,0,0.0773099186465654,0.0195475270146487,0,0,0.0697098862833295,0.0202532664323112,0.0875488483227641,0.0567877321269203,0.307948133125603,0,0,0.107013830309282,0,0,0,0.022767833…
TCGA-FD-A6TG-01,0.125936062833825,0.132046046009513,0.127866367757296,0.0820746500149783,0.0973333917796263,0.513976784136562,0.0274017107120152,0,0.110632893578001,0.107402866716777,0,0,0,0.0577252374854949,0.051810034902284,0.00883956021515977,0,0.0532718342025105,0.0188191649594627,0.0713775667918049,0.0435825066208415,0.356858070834289,0.00922433210036024,0,0.0830542208809986,0,0,0,0.01439117…
TCGA-FD-A6TH-01,0.0300177737608494,0.0929390566763312,0.132330819764541,0.119507810703702,0.0219661079086107,0.717370381907031,0.0834173361676266,0,0.0114827074394861,0.0260388228082826,0,0.120019872773204,0,0.0964014792983438,0,0,0,0.0445537505810689,0,0.329002537362975,0.0732717881284943,0.188150261354203,0,0,0,0.0276614440863152,0,0,0.0292163049235329,0,0.00402173333880618,0.00911990506970744,…
TCGA-FD-A6TI-01,0.0442888402655484,0.0316267709961037,0.227904070596558,0.125654701156626,0.0755752197180416,0.417223054381175,0,0.00165017644840636,0.01319041932917,0.150961211794225,0,0.0787470186235988,0,0.111641974654837,0,0,0,0.0804679175145126,0.0178159281485992,0,0.0283208370717474,0.326615549454937,0,0.0031346923871605,0,0.184669065165208,0,0.00278520940759849,0,0.000377716446933559,0.003…
TCGA-FD-A6TK-01,0.0471450210949018,0.240811087860578,0.291770087622391,0.196661136745607,0.0654155843472379,0.898187100544094,0,0,0.0336856948003955,0.173512313606538,0,0.0181833454068661,0.081780781867201,0.0998831310069152,0.000763620149383819,0.00379834940127132,0,0.0675858769374135,0,0.00428338572496679,0.127174521275262,0.346562133993144,0,0.0123824863772527,0.0220427679429613,0.008293543183…
TCGA-FJ-A3Z7-01,0.0186949636483711,0.058559299396019,0.214661311537922,0.108608051347037,0,0.31309404493301,0.137405630957021,0,0.133394953036622,0.16146155641127,0,0.0800853829302547,0,0.102228296049648,0,0,0,0.0057434369419501,0.0240022596553299,0,0.0841077231286299,0.13148835202254,0,0.015190025960386,0,0.124892382906348,0,0,0.0296058233547657,0,0.0287416708362906,0.0347889841515504,0,0.017255…
TCGA-FJ-A3Z9-01,0.0374071342048146,0.131147812961787,0.118344042754819,0.042959098560218,0,0.327409532885503,0.0698895856622401,0,0,0.00575422557899227,0.288442233258787,0,0,0.159837850795118,0,0.0114247494875541,0,0.070360054524212,0,0.180694516944697,0,0.0961955910232894,0,0.0806346793009848,0.0367665134241258,0,0,0,0.00397378017256006,0,0,0.000327173602441193,0.0164002407024139,0,0,0.009088056…
TCGA-FJ-A3ZE-01,0.055552695871347,0.10223423165549,0.0942276773565605,0.0634836444608459,0.00854525994054515,0.300275975287292,0,0.00409012987154806,0.11719904505252,0.265185861518923,0,0,0,0.125225102793152,0.133624313926798,0,0,0.0192117627932995,0,0.0268020039462029,0,0.135333720169856,0,0.0372238519637974,0.0943680576458462,0,0.0350457334967597,0.00669041682129764,0,0.000298008730068762,0.008…
TCGA-FJ-A3ZF-01,0.0509928359260198,0.0863880154160231,0.0942004058050692,0.0456191847600289,0.0109830028763958,0.2868882237496,0.0569674640240008,0,0.212923797210035,0.148931552948909,0,0,0,0.0713236231304103,0.12350550470975,0,0.0321316543263723,0.00560736794602621,0.041073810564182,0,0,0.18292490062859,0,0.0932049405300077,0,0.0314053839817162,0,0,0.00502202965403559,0,0.0187705323022304,0.0131…
TCGA-FJ-A871-01,0,0,0.438628106515873,0.0509093066418692,0.0324416968173068,0.547696771661351,0.00140322371648079,0,0,0.0554295633784417,0.0568594453399489,0.0673901581586075,0.0476000418006337,0,0,0,0.0209313360622992,0.00314619413632107,0,0.341810722373271,0,0.313191417019946,0,0.0720938583396628,0.0201440396743871,0,0,0,0.000152806175105104,0,0,0.00603608638318049,0.00619179554831467,0.0073385…
TCGA-FT-A3EE-01,0.0286677575516617,0.125883534738607,0.222420803674541,0.0806032513572693,0,0.523954503989826,0.0512907422307932,0.062224491503947,0.0767063421979552,0.0374589155541549,0,0.122095472168379,0,0.0808179777050481,0.00481114099544597,0,0,0.0404444092821151,0.00977247605721246,0,0,0.269605218860651,0,0.164496317722808,0.045873586857674,0.00784858609403087,0,0.0265543227697845,0.0112468…
TCGA-FT-A61P-01,0.0111923470746092,0.23789220193365,0,0.168681869597101,0.0144407088510155,0.603489193993182,0.00823499447997074,0,0.0147926826073652,0.104400444799204,0,0.0473778432232514,0.0396039265503171,0.133126856075692,0,0,0.0288412010005412,0.0696868854580232,0,0.10173147220736,0.107537317460648,0.317718333420572,0.0146024019418109,0,0,0.0123456407752448,0,0,0.00499805692252725,0,0.008978…
TCGA-G2-A2EC-01,0.0773222782096546,0.203352015597772,0.143448168447352,0.0710952697288389,0.068068672981566,0.505967818052097,0.01310000187241,0,0.0910433591691198,0.0733263457538157,0,0.299350410433334,0,0.0246638807491172,0.122753234953672,0,0,0.0513858359430633,0.0114668736596793,0,0.00382588162622065,0.141790537624651,0,0.0555795633424971,0.11171407487242,0,0,0,0.00627216864816073,0,0.0435907…
TCGA-G2-A2EF-01,0,0.14136565477221,0.298913204891472,0.267221125880757,0,0.817472363899418,0.00810162006178295,0,0.0124373192586435,0.158993564042666,0,0,0.158124088722955,0.0514718799390999,0,0,0,0.133873662728893,0,0.0270135590612185,0.144781464451976,0.21887972849079,0.0117753070472492,0,0,0.0745478061947247,0,0,0.0053954667558144,0,0.00828292885616921,0.105885549141867,0,0,0.105306501353063,0…
TCGA-G2-A2EJ-01,0,0.139488075682258,0.161169026579042,0.296860096967062,0,0.509947682400409,0.00349934052163982,0,0.00460040537632808,0.0870455623133805,0,0,0.0856750474243689,0.0656952076159981,0.00330691349277177,0,0,0.0640377883340597,0,0.125998223769691,0.0797192346325166,0.0736475387919417,0,0.153918621786238,0,0.250208262813811,0,0.0026478531272539,0.000810045533652479,0,0.00106492574959213…
TCGA-G2-A2EK-01,0.094110837850514,0.161224499464856,0.106718017813505,0.0791141564483921,0.0205230470102694,0.341275383969527,0.0179248987445622,0.193833266306496,0,0.110415912194981,0,0.182920919682618,0,0.0488563867356731,0.0807597027440493,0,0,0.0723700558651179,0.0213374814345495,0.014451090106114,0,0.130269754938651,0,0.0406590232045475,0.0862015080426398,0,0,0,0.00550748895478444,0.05955596…
TCGA-G2-A2EL-01,0.0770823509075717,0.133277638457456,0.0854433960410864,0.0620897545554201,0.0159611831623307,0.31816099654769,0.0826362067556112,0,0.0921508097251271,0.147464762913704,0,0,0,0.207627728257887,0.0226225566990626,0,0,0.096558315919966,0.0031268024443275,0.177963140704013,0.0525878892051846,0.0639201686902906,0.0418241621419439,0,0,0.0115174565428818,0,0,0.00841645672957467,0,0.0093…
TCGA-G2-A2EO-01,0.0682670105461063,0.1239183472054,0.279989588784173,0.106393531006646,0.0811972118318909,0.446872740947532,0,0.00976702973950268,0.0587694452043164,0.199252916403589,0,0,0.088181028563016,0.134559083049512,0.00887214915731099,0,0,0.0692611050187667,0,0.104933022929183,0.0764908000333094,0.2422833694976,0,0,0.00763005040389404,0,0,0,0,0.00474789570063545,0.028568685020561,0.096859…
TCGA-G2-A2ES-01,0.0351272318752331,0.120963032304116,0.117165612397453,0.204219283383106,0,0.447196410710302,0.00765728053121919,0,0,0.0504985803814861,0,0.179009123432896,0.0338151840780865,0.0867084327211114,0,0,0.0306358155204516,0.0406605345907397,0.0179566386415434,0.116653701578482,0.0921652046968867,0.164033350542672,0,0.0802332037462003,0,0.0947135789679022,0.00444016106847379,0.000819209…
TCGA-G2-A3IB-01,0.0221101102659546,0.108627065899137,0.173273570291438,0.137255065255651,0.00892208034216266,0.47778787054504,0,0,0.0548653720874639,0.113031286505746,0,0.0523192289268785,0.000736044109139987,0.0204277685725311,0,0,0,0.088110319192866,0.0334468428950504,0.288550403265555,0.0081846121668589,0.227200556748336,0,0.0792197067219334,0,0.0339078588076403,0,0,0,0,0.00801468139437054,0.0…
TCGA-G2-A3IE-01,0.0548279769857099,0.107883974595976,0.142399460998347,0.0426520666115351,0.0345135344500846,0.334807670024231,0,0.0183023345479566,0.15829692713731,0.105571488581502,0,0.0775591035427082,0,0.0839880287908314,0.172200871544801,0,0,0.0246768695715637,0.00213458002856719,0,0,0.296351753060689,0,0.0415450162779202,0.0193730269161517,0,0,0,0,0.00232747029651657,0.0201302951258243,0.01…
TCGA-G2-A3VY-01,0.0723672708252413,0.0848630026846366,0.12807105219225,0.0640381345926791,0.0998169076743504,0.350590448420316,0.0495057548788342,0,0.325545626779305,0.113591196150171,0.204652092685892,0,0,0,0,0,0.0303733820604118,0,0.00394570116445696,0,0,0.103065484408967,0.0242520492944153,0.0884657604397358,0,0.0566029521378102,0,0,0.00533139013841677,0,0.0350587673789405,0.0122329006889845,0…
TCGA-G2-AA3B-01,0.0801030739124068,0.0974318200794345,0.0681734221291086,0.0784857685567352,0,0.332617754684354,0,0.00647498794438623,0.0926533856129969,0.152506905621635,0,0,0.053719209863941,0.253141645266243,0.0644508823316518,0,0.00898347881374686,0.0512595152983289,0.00544503130101348,0,0.0436760251323864,0.130037085920788,0,0.0864059345566486,0,0.0512459123362343,0,0,0,0.0012658021948995,0.…
TCGA-G2-AA3C-01,0.0042407838051918,0.222930787467338,0.138776187730362,0.136908025935947,0.409608877970597,0.628740626168198,0.00282169585967351,0.00122519547640465,0,0.0299643220624973,0,0.0951186099075513,0,0.00941450345132986,0.00804254550528678,0,0.0238918261090574,0.0477665907681549,0.237652953085592,0,0.004445433295549,0.536332028582397,0,0,0.000881117961486184,0.00244317793502007,0,0,0.000…
TCGA-G2-AA3D-01,0.13497201992005,0.15877870693127,0.0264088109330181,0.0874174667822422,0,0.445293557459642,0,0.24044571815896,0.055106194241419,0.0958997126700708,0,0.0898144541332423,0,0.202132134206557,0.0401038514086102,0,0.024269628262362,0.0102484724367298,0.0347477449160783,0,0,0.100859267946456,0,0.0602676219292077,0,0.0461051996903065,0,0,0,0.0512433757934041,0.0117441368541672,0.0204379…
TCGA-G2-AA3F-01,0.057856623450441,0.1120965245712,0.126665623813378,0.0517686836886522,0.0392170269943334,0.355255016730248,0.0577151739253939,0,0.0952460523428143,0.0520929178872204,0.0872640699542531,0,0,0.000879582753590271,0.0349067273257859,0,0.0733988697227207,0.0222425059309282,0,0.0863831401587597,0.0642109330944122,0.405485342413536,0.00313441018101383,0,0,0.0170402743095711,0,0,0.009592…
TCGA-GC-A3BM-11,0,0,0.459803009362662,0.229418446099526,0,0.586379845040935,0.0537173479185095,0,0.00923514109290613,0.110005396745376,0,0.127480675996764,0,0.0397929286879749,0,0.00302730537268418,0,0.0855385702466308,0.0458608783033938,0,0.00311772315819025,0.0476923259168112,0,0.0119118523084264,0,0.453312380930585,0.00930747332174816,0,0.0242629457216936,0,0.00417131030759906,0.04968702055759…
TCGA-GC-A3BM-01,0.0716191223667348,0.0986621334548721,0.188357044618809,0.104085289267623,0.0182884307157717,0.38993215461337,0.0292637482817952,0,0.0775826307649344,0.128526932819368,0,0.091276491057202,0,0.177000113574175,0,0,0,0.048980714606757,0.0139332097711039,0,0.128942233722754,0.174450152321143,0.059662268538905,0.00683437170205563,0,0.0632703726103959,0,0.000276760229410877,0.0073330514…
TCGA-GC-A3I6-01,0.0437363402475274,0.177560394446903,0.172753467882511,0.186207125348305,0.0547668691871862,0.580438016062106,0,0,0.062883762909529,0.0635488449764182,0,0.0580311970371061,0,0.0823546585137662,0.0140384803829289,0,0,0.0771749922075013,0.00105087538403108,0.0755451085812495,0.108446637130842,0.308964685057574,0,0.105755324036724,0.0414930562030309,0,0,0.000712377579299423,0,0,0.036…
TCGA-GC-A3OO-01,0.068231491586966,0.124524406713502,0.163421242555825,0.117904132308328,0.0680900210048812,0.529186385370978,0.0152582799294216,0,0.015241418428297,0.0254939894969831,0,0.000534457980307981,0,0.120445863024947,0.0281879421513388,0,0.0213848918311239,0.000747327877511418,0,0.361375427643868,0.0270336832444091,0.300956990954717,0.00876991611356144,0,0.03688193065592,0.03768788066759…
TCGA-GC-A3RB-01,0.102219247225456,0.119432862566474,0.10159928126667,0.0860405497899451,0.0123312082830113,0.432220820479664,0.0199691929855954,0,0.0264022783237259,0.0627661738231479,0,0.0282688713640082,0.0115040327537969,0.115570554882222,0,0,0,0.0779281154057692,0,0.0547473908050344,0.057058706018039,0.275845190777567,0.206272615397719,0,0,0.0636668774633748,0,0,0.00405428884793645,0,0.005360…
TCGA-GC-A3RC-01,0.000391941179234115,0.233981191504142,0.168514556881024,0.14417718187977,0.0753745663579298,0.829544751095729,0.00136489546997979,0,0.00697984913755554,0.106303855107625,0,0.0652081041983504,0.00319345450999051,0.0724709975990163,0.0203652037362136,0,0,0.0732845840002939,0,0.239382556366665,0.0431992382813743,0.326975783650207,0.00940893475690767,0.00674876626394665,0,0.025113776…
TCGA-GC-A3RD-01,0.0729127895688687,0.0626313468120299,0.15319752123395,0.0791028540991961,0.0836476496522672,0.359025094593384,0,0.00991989008909138,0.120367890535437,0.002079432375541,0.0399697553289106,0.0140925011621292,0,0.000243497491341175,0,0,0.0412740563677349,0,0.0019941018136759,0.274108239638823,0,0.315794164884192,0,0.0961437328307275,0,0.0728859877454131,0,0.0111267497369833,0,0.0024…
TCGA-GC-A3WC-11,0.152068977622999,0.284978491446331,0.20989679309633,0.162123124959437,0.0141780575342522,0.694283784314767,0.112149915512659,0.0646838512938137,0.0479970077558033,0.0353650649437942,0,0.345651577195266,0,0.0952616747886997,0,0,0.00555802019578083,0,0.0219218577447957,0,0.00386050021314935,0.144706323517497,0,0.0225739136025028,0.0746747163672229,0.0255955768690153,0,0,0.091513159…
TCGA-GC-A3WC-01,0.0856060290045251,0.0967533414446851,0.332623392074102,0.255071981403548,0.0866885092499257,0.51495696772542,0.0219720538015594,0.0274501486593982,0.044026623572485,0.148008123649109,0,0.0611628493419565,0.003198336539754,0.0972752165120472,0.00993273865700152,0.00429995869132766,0,0.0782536471393654,0,0.00673375075685939,0.158449351041603,0.23979122750947,0.0729757374336925,0,0.…
TCGA-GC-A3YS-01,0.0285424017706531,0.136115966467976,0.235397787685044,0.128556594805717,0.213898450952832,0.488744602667324,0,0.0376172465666172,0.0130833198326067,0.0297432898475505,0,0.101463017224686,0.0124963748712274,0.0617547973522024,0.0393392172132149,0.0105417634819411,0.0263620959273542,0.0369164688398489,0,0.0383077796084796,0.0200971821818927,0.415341358309761,0.0477017118316857,0.05…
TCGA-GC-A4ZW-01,0.0672244086937413,0.138046597698888,0.149842455078171,0.119309147724696,0.0567173058973082,0.381978754716489,0.0251094710189691,0,0.158986104186916,0.184803244670207,0,0.0381717222412014,0.064133386366726,0.142741930677897,0,0,0,0.101849828624563,0.0278410879822008,0.0523726560457032,0.0385046141977318,0.146757940881433,0,0.010519876437836,0.00820813666861475,0,0,0,0.003647472296…
TCGA-GC-A6I1-01,0.0995718963636836,0.125468910261359,0.284444560412579,0.214312672640031,0.0127402963082549,0.745764564738774,0.00983677843987181,0,0.0500842235409348,0.138561065958521,0,0.067641761585247,0.0361585896655624,0.0390951570671206,0.0273873038510629,0,0,0.0318488760663692,0,0.19463234714486,0.047032914131687,0.187966533621333,0.00321463972050969,0,0,0.148177498814194,0.007838200266972…
TCGA-GC-A6I3-11,0.443066031725168,0.635297736183762,0,0.200811184186079,0,0.546047412665938,0,0.18475547806772,0.0468398334996585,0.153597194337416,0,0.150579193438345,0,0.219835981579125,0.0136858850783025,0,0,0,0.0236805121242608,0.0320483245875057,0,0.102735942204214,0,0.0522215765262968,0.00815229947281924,0.00497250909432133,0,0.00689526999001515,0,0.186399135909908,0.0472565391933877,0.1549…
TCGA-GC-A6I3-01,0.14714365728808,0.204814080800885,0.03825470882759,0.066761903853487,0,0.495685369731215,0,0.034704688827619,0.0856615047057113,0.224455059160757,0,0,0,0.157948573550631,0.0706173444051342,0.0271995640149068,0,0.0316858654299196,0.00124318362606452,0.131529636627455,0.0446154989700497,0.182896316681277,0,0.00409261821009712,0.00335014579037788,0,0,0,0,0.014042684544568,0.03466152…
TCGA-GD-A2C5-11,0.184097949692664,0.234855043799758,0.245325705525671,0.134372913811417,0.092414772881714,0.552892769829653,0.0685839139375569,0.0561841876425261,0.0870015846567287,0.107827956530537,0,0.373874020534704,0,0.0369178117365403,0.0185359471779072,0,0,0.0319607401009441,0.0280578408840099,0,0.000765476548608596,0.105417084785359,0.0276967330308638,0.0154076203270889,0.0234295750399247,…
TCGA-GD-A2C5-01,0.059541315082822,0.105315523705458,0.115740300061388,0.0909502991590569,0.0450438550034963,0.372338473244983,0,0,0.0802596573850547,0.0131813113569322,0,0.169451895620396,0,0.0750453258526211,0.0353894772232109,0,0,0.0443364711289262,0.0503148026195009,0.0137461851227391,0,0.271962897108347,0.0566984135143176,0.079464361776334,0.099332286507282,0,0,0.010816914784339,0,0,0.0203602…
TCGA-GD-A3OP-11,0.0297075002294265,0.132210121970901,0.191874302192435,0.161754398694426,0.0132001133677921,0.55163306683698,0,0,0.015379208203328,0.113995525742164,0,0.156640323259985,0,0.0459470551600004,0,0.00255799921229092,0,0.0793232423251046,0.0625170810889609,0,0.169594915037285,0.197983349883696,0.0474024563126643,0.0250454517609708,0.0192700356166854,0.064343356396866,0,0,0,0,0.00847497…
TCGA-GD-A3OP-01,0.0762658199759139,0.122690100284899,0.163326618940198,0.107579445158263,0.0697533002917704,0.39831775647292,0.0518571742384728,0,0.0635061325660228,0.110042141061508,0,0.109543064610167,0,0.0727914644000961,0.019018627682303,0.0114371584029322,0,0.0588066083915594,0,0,0.0700093330827758,0.297070233978988,0.0118303521880665,0,0.124007030026979,0,0,8.06793701284916e-05,0.0278304036…
TCGA-GD-A3OQ-11,0.00856772776083089,0.138853305678292,0.270996191369013,0.124703914331259,0.0567973513725694,0.600549481494255,0,0,0,0.256082874250121,0,0.117483468277338,0,0.0476470876825786,0.00424835081939496,0,0,0.0381197600916309,0.0303457709137424,0,0.00095145058079119,0.323363993871739,0.00288480406877652,0.0140848220805043,0.0621680926471309,0.0966185229760815,0,0.00600100174017028,0,0,0,…
TCGA-GD-A3OQ-01,0.0582782685490068,0.116770910268535,0.271153300514618,0.135265393791907,0.0027614830280999,0.621848596935295,0,0,0.00666279916946117,0.0799771840881116,0,0,0.0148451743746078,0.202998671381408,0,0,0.042327560291425,0,0.0307735684428497,0.128092871346552,0,0.251551086343241,0,0.145248768102386,0,0.078513374326759,0,0.0190089421331985,0,0,0.0016561946559561,0.0198802007258849,0,0,0…
TCGA-GD-A3OS-01,0.0261709495122612,0.265307310701781,0.0483822356166488,0.0885541075016896,0.242918576182686,0.459116806787915,0.022432295618388,0,0.0259234923933211,0.0763579622315368,0,0.0569503869193776,0,0.114511359926768,0.0925337841693386,0,0,0.0335604366743609,0.0113576154352829,0.193880636585031,0,0.301656509737621,0,0.034309783909961,0,0.0358469948531717,0,0.000678741545841273,0.01079311…
TCGA-GD-A6C6-01,0.0661124411053402,0.10984554076396,0.0572476502003772,0.0494168179291322,0,0.329551793512865,0,0.00419299932416882,0.0359611704754242,0.147372402503379,0,0,0,0.0886108689860331,0.0702508818578024,0,0,0.0550592746769485,0.0171390234730677,0,0,0.383375713923647,0,0.15095843663274,0.0457592402054117,0,0,0.00131998794137766,0,0.000299903026155189,0.00257211199331644,0.010540767137205…
TCGA-GD-A76B-01,0.103460496598183,0.164162874929347,0.0994481397587386,0.110679546846845,0.000745410628149861,0.425805190716638,0.00932879644381918,0.00171509142400443,0.209071006217473,0.151333603042295,0,0.1053617357484,0.0116305028274973,0.0687573695830023,0.069851199553772,0,0,0.0332918583394807,0.0289569752784697,0,0.111115892882385,0.159676393135859,0.0226586054015455,0.0121617457699442,0.0…
TCGA-GU-A42P-01,0.0748732494795032,0.105784540034143,0.0881601126337122,0.0629146829522213,0.0900929636535153,0.293395350498524,0.131494078235407,0,0.0531492424033197,0.0933617171871689,0,0,0,0.116017065522279,0.116771375139794,0.011562422980025,0.071898035128965,0,0.0287250758074331,0.269702548580258,0.00481818602143675,0.0253488820849818,0,0.0710954009213128,0.00605596998761878,0,0,0,0.01688466…
TCGA-GU-A42Q-01,0.0838808386309478,0.108161913725392,0.179435336125076,0.117170204645149,0.072849471590783,0.38980652445419,0,0,0.363877690536301,0.0309767968792743,0,0,0,0.0678216735895253,0.016498446004026,0,0,0.0735383902342175,0,0.285024608917346,0.0297032864010252,0.0865022486674334,0.0327843191983405,0,0,0.0132725395725106,0,0,0,0,0.0525493139975239,0.00447350708268856,0,0,0,0.0097944515808…
TCGA-GU-A42R-01,0.0855688205485158,0.0737444884736372,0.154356764889072,0.0858076331335706,0.0293334026179447,0.343973360331106,0,0,0.0772721725601522,0.142441562737105,0,0,0,0.231811544039788,0.0560390242406884,0,0.015169195630235,0,0.112230359480434,0,0,0.223503865156231,0,0.127647677301192,0.0138845988541738,0,0,0,0,0,0.0133739203371396,0.0246531454937517,0,0,0,0.0401209001960455,0.00969898245…
TCGA-GU-A762-01,0.183057527198262,0.203348959537104,0.335205727689635,0.18186930216099,0.0308203327190232,0.873636007734376,0.0246175114488592,0,0,0.234947900469616,0,0,0.181250572580114,0.0648481342125595,0,0,0.00129771011702496,0.0683792987400704,0.00958230411489983,0,0.149874387651662,0.253620246757373,0.00869926351153608,0.00288267039628584,0,0,0,0,0.0193109546475313,0,0,0.184302473461902,0,0…
TCGA-GU-A763-01,0.0642959033613284,0.101353089914858,0.0914513784883816,0.044785059598527,0,0.315346251243482,0.0116113335610901,0.0634579159908146,0,0.150465672405272,0,0,0,0.350820324879163,0,0,0.00223098158603767,0.0876051703261342,0.0186666177753747,0,0.0208705619592271,0.233666565241374,0.0279389231544391,0.0220086002872745,0.0106573328337995,0,0,0,0.00075785674966743,0.00414181624362471,0,0…
TCGA-GU-A764-01,0.101735972225583,0.192764337583274,0.194727139188501,0.159879355432415,0.0703582250474872,0.610943627097705,0,0.0337014850885168,0.129331743304024,0.0827048461200088,0,0.04289349423923,0,0.129909795354967,0,0.00718392650882705,0,0.0988226157247362,0.028102460265655,0.0638252531948253,0.113797344757858,0.234034866126075,0.0189188720037003,0,0,0.0167732973115769,0,0,0,0.02362365072…
TCGA-GU-A766-01,0,0.168488413759268,0.26417909111291,0.396718095941559,0,0.750817399961814,0.00765501840034494,0,0.00738962993146955,0.142479851462257,0,0,0.133794455744418,0.0915796555192839,0.0010086673399781,0,0.0049915790327017,0.0796384825582115,0.0627495762554953,0.00751823253525384,0.180704860672104,0.0910567900242721,0,0.151471907686041,0,0.0323098519829148,0,0.00565144085525396,0.0075202…
TCGA-GU-A767-01,0.0605725908064998,0.107464561725822,0.103835632937671,0.061762522837305,0.0347977973756921,0.310689725806378,0.0513674379430999,0,0.00991825108490868,0.0574385102696227,0,0.0580806613205481,0,0.0778272330866863,0.0831618271387763,0,0.0335219568471569,0.00745985433783723,0.137812950781819,0,0.0227492779733679,0.299598503172445,0,0.0497528131265448,0.0393100453931692,0.072000677524…
TCGA-GU-AATO-01,0.0798782351676386,0.101270887077864,0.181187098422702,0.142116634935945,0.126020293730571,0.395161206390288,0,0.029490682333485,0.173144506599694,0.177997191955465,0,0.000782118171526668,0,0.100020715663578,0.00923202514875004,0,0,0.0771453406848898,0.0460476510914953,0,0.0951854818980929,0.252710354598418,0,0,0.0187471223546658,0,0,0.0194968094999403,0,0.0129857325877289,0.07624…
TCGA-GU-AATP-01,0.124648759711241,0.138695262663933,0.083985267110306,0.126768196481985,0.110015989389234,0.44003302286069,0.0229365449971116,0,0.0147465615488076,0.100862553867341,0,0.0519005019954517,0,0.117249746420455,0.0121992600556979,0,0,0.0283336127326516,0,0.160987897840187,0.0254173219993834,0.3092504376347,0,0.123096543232237,0.0318874614848796,0,0,0.00113155619109718,0.009386633179226…
TCGA-GU-AATQ-01,0.0723532876021881,0.0984772867929237,0.18007008208594,0.0926063627527434,0.0429761299921919,0.415109027126326,0,0.00506985675439642,0.025290056747736,0.0427262789911034,0,0.0511998837479622,0,0.112376600353125,0.0346804870457918,0,0,0.0757917814591023,0.00996802720929513,0.118817471407959,0.158281804500937,0.329122747416384,0.0108204002507506,0,0,0.0258546041154568,0,0,0,0.001130…
TCGA-GV-A3JV-01,0.0743988890963328,0.10302620484892,0.196232149369143,0.0961883786319143,0.0202091001733255,0.391646191321757,0.0296505945778802,0.00175520588093048,0.0604316819473898,0.169537249057473,0,0.147385199195831,0,0.142468676933262,0.021516054304511,0,0,0.0562906192498891,0.0035428809589114,0.00376178451557311,0.0782326028845251,0.203930811935945,0.0410792490936643,0.00280007673589015,0…
TCGA-GV-A3JW-01,0.0897157664004543,0.0695464183955134,0.11702021181955,0.0533627548447588,0.0321970774985138,0.355020486725016,0,0.0386748245889834,0.255750271569771,0.205800898679405,0,0,0,0.0810910049337065,0.0384846472303762,0,0,0.0314236371304397,0.0396672975639221,0.0955742466931694,0,0.152604796933605,0,0.0172166210221146,0.0349771482191565,0,0,0.00873460543535059,0,0.00419151496599409,0.02…
TCGA-GV-A3JX-01,0.0917244477955377,0.153149203931031,0.147027512163137,0.145518210607494,0.0379026831374209,0.556977811445824,0.0245809126267168,0,0,0.163488623189041,0,0.0518618761550056,0,0.182198625055509,0,0,0.0232642739825212,0.0417300117296873,0.00136490668723269,0.0307229678062602,0.177954256664626,0.287906995681453,0.00486593748950384,0,0,0.0100606129324436,0,0,0.0148204114701031,0,0,0.09…
TCGA-GV-A3JZ-01,0.0800166867235314,0.0930808034417767,0.0991355234138508,0.0798979747131677,0.109144128039484,0.39514595173687,0.0379603393204082,0,0.0718226483470442,0.0989218766817254,0,0.0372887262356254,0,0.0687020478419468,0.0194410778436786,0,0,0.0214479223540295,0,0.164730997666523,0.0578384116905042,0.352262761771566,0.00278571514318313,0,0,0.0602801503992952,0,0.00651732470447005,0.01210…
TCGA-GV-A3QF-01,0.0928156590776513,0.0942772298567359,0.0867229893017566,0.0685158066374671,0.0522850317694639,0.346818034100608,0,0.00862811308449719,0.24894315650955,0,0.17975101060717,0,0,0.0158669734981039,0,0,0.0355932067335095,0,0.103166618280734,0.0117191316502953,0,0.0119164957384926,0,0.131626006966197,0,0.0231892281189057,0,0.229600058812545,0,0.000854666122371148,0.0246593061751983,0,0…
TCGA-GV-A3QG-01,0.321130532876836,0.494433001646483,0.196643522575395,0.237608588805115,0.0945424115013762,0.761919371244554,0.154470778275193,0.00612889409082312,0,0.120344865712624,0,0.034731280280146,0.0350099295939197,0.0368500808391859,0.0387676345149409,0.0453315612995737,0,0.0517597575124614,0,0.156284537511857,0.124370791328629,0.147948314017197,0.00157167844410952,0,0.04642989657934,0,0,…
TCGA-GV-A3QH-01,0.0841390901475098,0.110780621382205,0.0653698085947351,0.100886191129723,0.0473266018526048,0.344156775208945,0.0259226416735252,0,0.104146019218995,0.0802681095716097,0,0.0280901333310566,0,0.249082541015841,0.045832694712912,0,0,0.0861518456522278,0.0321294102428949,0.0377454583887216,0,0.0764453199154623,0,0.218995602762866,0,0.0111103129679619,0,0.00407991054592594,0.00342072…
TCGA-GV-A3QI-01,0.103814597137079,0.104843034253011,0.173758340805191,0.0678299488454797,0.0556082859415354,0.398055155981309,0.124929572001651,0,0.435538379801058,0.0300888124428469,0.0451194557796828,0,0,0,0.0628981119954363,0,0,0.0166684013215651,0,0.00818140037025559,0.00591144112028483,0.191449896812392,0,0.0431139948070099,0.0361005335478177,0,0,0,0.0192645346391372,0,0.0671613939751614,0.0…
TCGA-GV-A3QK-01,0.0672524077727181,0.128121241432226,0.109871171371091,0.0828359467699657,0,0.340063349666097,0,0.0331804708952408,0.0345005992218612,0.181586150976278,0,0.0119580774681776,0.0752954228701257,0.137520906975983,0.0656769937932872,0,0,0.0664706019638347,0.0291705953995791,0.0711086740400624,0.0285543431251245,0.10954149636253,0.0245010231336645,0.0929122789369066,0.0380223648373446,…
TCGA-GV-A40E-01,0.0359900860341044,0.139673569529508,0.146363193162207,0.173272382170489,0,0.603878595095533,0,0.0045985505683591,0,0.136865355367545,0,0,0,0.126344182130422,0.00567643982008121,0,0,0.0672905142022506,0.00607488910364662,0.0143840837815072,0,0.208432050033538,0,0.200642151344049,0,0.187189149312727,0,0.0425026343358735,0,0.00189066900361826,0,0.0562714449294294,0,0,0,0.05194572189…
TCGA-GV-A40G-01,0.0462823336747979,0.0773963223834308,0.118471814536897,0.0795707125614986,0.0599597658077757,0.311390573755756,0,0,0.0511827706914028,0.125593481189637,0,0,0,0.104362994622317,0.141604685083079,0,0,0.0758006734000859,0.0518751472800018,0.179339595977201,0,0,0,0.0916516425200031,0.17281886803879,0,0.00577014119748126,0,0,0,0.0061523732680997,0.0150968375857873,0,0,0,0.012544848385…
TCGA-GV-A6ZA-01,0.0882260132712573,0.11383559272292,0.109286297477884,0.0818073823375046,0,0.360152243811753,0,0.00501127018408521,0.0237165323310013,0.209698095000984,0,0.0440797416525875,0,0.262443014989557,0.0166891746675269,0,0,0.0753458692279466,0.00944256853591915,0.0313080063792951,0.0713269924719559,0.127008013704508,0.0121746031444832,0.0865427530913205,0.0252133646188299,0,0,0,0,0.00133…
TCGA-H4-A2HO-01,0.0224287897616219,0.122777914477784,0.165652690894621,0.0590849822523796,0.0337347285607606,0.341232011685948,0.0508814168522026,0,0.0556023142514546,0.112696142656514,0,0.255126635870424,0,0.00357868809213185,0.0377475008476517,0.0182559511613088,0,0,0.0270789146352126,0.201236613597802,0.0113394631614854,0.150305219351964,0,0.0617854917584994,0,0.0143656477633492,0,0,0.01462378…
TCGA-H4-A2HQ-01,0.150864970109216,0.113174855140936,0.176312517154225,0.112231390534869,0.0446628224231954,0.442685938582259,0,0,0.143765049283514,0.0892233793379505,0,0.00502562851462992,0,0.227106347341299,0.00608933979894265,0,0,0.0550797154053725,0.0207527191299178,0,0.0729555396186448,0.164845878814923,0,0.189629761258231,0,0.0249437137436317,0.000582927752942439,0,0,0,0.0335756958039837,0.0…
TCGA-HQ-A2OE-01,0.0202108201086048,0.0673502275820404,0.24268696804401,0.0961268734709625,0.0845731930051659,0.385760483122695,0.0191284296791852,0,0.197603213589392,0.165802990326532,0,0.0351323201573903,0.00247121213088286,0.103103646944506,0.0350135300112558,0,0.0666909888281626,0,0.0767371351193515,0,0,0.0820962842063522,0,0.0967958044845791,0,0.0890777257158087,0,0.0303467188066022,0.0047169…
TCGA-HQ-A2OF-01,0.172010863867319,0.0399448023137913,0.166122680507399,0.0687553678887232,0.08327419569558,0.362151125998581,0.0419548548653304,0,0.133987753546289,0.0656848568923267,0.024065767381886,0.0639726597195752,0,0.0066417733576981,0,0,0.0657674293655294,0,0.0266007136572412,0,0,0.38476432644703,0,0.0136474650224842,0,0.172912399744609,0,0,0.00406276713695812,0,0.0129749237271834,0.00636…
TCGA-HQ-A5ND-01,0.127742543315882,0.115191488848394,0.173227785902118,0.123113903645732,0.0356403315748715,0.458546408109977,0,0.0119435894467767,0.103840923311785,0.174313539703145,0,0.00517711517110942,0.00391726065501061,0.114344857757619,0,0,0.035002234703448,0.113262600953749,0.020615515593521,0.122992569885233,0.161081545231014,0.0158704788230019,0,0.0200694273944269,0.0914959670277388,0,0.…
TCGA-HQ-A5NE-01,0.0539896227020878,0.141821038169399,0.230758416391044,0.200542617046989,0.0128062714817964,0.712061148710973,0.0163386645099892,0,0.0480853982986025,0.00476399640627087,0,0.0515981060383514,0,0.0354018608369536,0.00440464459523064,0,0.0223123868490502,0,0.00535472900834177,0.134496697894776,0.0202235938585918,0.155780371630559,0,0.237266295158034,0,0.253329869462532,0,0.010643385…
TCGA-K4-A3WS-01,0.0424345999164953,0.236530871831097,0.199946132931718,0.121072550338522,0.0942122288810731,0.537659936378864,0.0873868950236534,0,0.0351622159178144,0.135818557283049,0,0.0331867667559703,0,0.0327993110763938,0.0496764910841069,0,0,0.0322460844652895,0.0459546436639606,0,0.19563633130459,0.268295114602383,0.0205838743284711,0,0.0529515042175368,0.0103022102767805,0,0,0.0697242034…
TCGA-K4-A3WU-01,0.169984447144625,0.306938085671304,0.226032243182387,0.123522799602072,0.116441084656952,0.53391386660537,0.172339772620084,0.107745819470994,0.0838826233275942,0.0941892449800026,0,0.196437919692697,0,0.00755755257641166,0.0313488958569289,0,0,0.027792949388557,0.00534852168350939,0.0258786255092349,0.00382646193627204,0.179382784981923,0,0.028633215629867,0.0196204577448264,0.0…
TCGA-K4-A3WV-11,0.0356081763175586,0.125236561671625,0.205044357510372,0.0864618250237298,0.0612517142047781,0.37401679507422,0.103219992040622,0,0.0457165853297941,0.262297336531134,0,0.0614014088385758,0,0.0423734399599889,0,0,0.0419123918663618,0.0158464848681515,0.0102160293113748,0,0.0160795425027943,0.269296382849357,0,0.0141690754953724,0,0.117471330406474,0,0,0.0305688539119579,0,0.013539…
TCGA-K4-A3WV-01,0.0934299686817258,0.215232726133875,0.0961776833507392,0.110240769405721,0.0681582320825328,0.461011827059878,0,0,0.239920827510398,0.0369600803566118,0,0,0,0.170741185618892,0,0,0,0.0268877167107478,0.00914796172324755,0.246897692485638,0.048599414964776,0.0452300232395892,0,0.0396523753471097,0,0.131242827542839,0,0.00471989450015103,0,0,0.0420868470918187,0.0064835273644704,0,…
TCGA-K4-A4AB-01,0.106881160355886,0.097153291376918,0.193360190108051,0.1677875226067,0.11658508745526,0.508929558286513,0,0.0708464837976519,0,0.0312731182370225,0,0.203922247301228,0,0.0722714795500973,0,0,0,0.0660877721713163,0,0,0.00345993491716778,0.338444792294227,0.0952875616207911,0.0574360383009217,0.0557102688234436,0,0,0.00526030298613328,0,0.0256009265181367,0,0.0113007838789248,0,0.0…
TCGA-K4-A4AC-01,0.0159035884729758,0.159809252991482,0.0914061596275942,0.178683029259661,0.0934674136497638,0.496035136160595,0.00810208000333308,0,0,0.0719822915555276,0,0.0417288405053195,0.0209510239662188,0.0475097430066713,0.0208288845158991,0,0.082308970417137,0,0.018000802757266,0.0534663723022888,0.0885683330988866,0.449322136397496,0.0187027286181127,0,0,0.0785277928558436,0,0,0.0023577…
TCGA-K4-A54R-11,0,0.0309773939812634,0.378919261172359,0.220969498532336,0,0.624930291830083,0,0.000957131928160516,0.0176355133220575,0.286037761952942,0,0.0571253105642921,0.0736077576908113,0.00138348283202321,0,0,0.0445493949763267,0,0.0246514971866363,0,0.00347107512164615,0.159489685232777,0,0.0533752985879147,0,0.276172764948279,0,0.00154332565613315,0,0.000412302884037978,0.00759683465804…
TCGA-K4-A54R-01,0.0122838523077293,0.140752612523599,0.193576100570214,0.170013285504097,0.0123624558097319,0.536984738151607,0,0.00232602139451219,0.0714799027949625,0.186568335489141,0,0,0.0638483083509295,0.0939652852164759,0,0,0.041028391600729,0.0942355489952384,0.0108803224578828,0.00348541603778956,0.141349540934407,0.262832376623097,0.00223714539986136,0.00528918393798593,0,0.019929065844…
TCGA-K4-A5RH-01,0.407771927987597,0.034081789451325,0.587520982530191,0.21053287474922,0.214983979221866,1.30859834284998,0,0,0.021048502963491,0.334931123424259,0,0,0.0675102409141255,0.0680845515358048,0,0.0336910578166784,0,0.0894678647024404,0,0,0.0658614542878072,0.312831324815152,0,0,0,0.00657387954024144,0,0,0,0,0.0226801080247176,0.360893792460114,0,0,0.0727433945949917,0.0733622237327228…
TCGA-K4-A5RI-11,0.13533193754522,0.336300606784095,0.341013421129213,0.236813834392178,0.122605272312003,0.757683903225994,0,0.0689680197802696,0.0348250541036514,0.122621427147527,0,0.193251453110059,0.0035627991024899,0.059665538375621,0.0554606593255968,0,0,0.0180009872875219,0.0807440976128294,0,0.0210301301926806,0.208534768989442,0,0.0435160961542155,0.0780483932463083,0,0,0.011770575571787…
TCGA-K4-A5RI-01,0.0838665951736965,0.0929658309916426,0.156890098275683,0.115206870875085,0.0752674487106304,0.415228698154368,0,0.00207490409335075,0.0605356143625489,0.003578391469003,0,0.0813041022433619,0,0.0273741670043676,0.0063490311825623,0,0.0286064693831763,0.0943224101308158,0.0714244477394943,0,0,0.242219716369676,0.104614063397863,0.0249380470055018,0.252658635618278,0,0,0,0,0.000545…
TCGA-K4-A5RJ-01,0.126052419799202,0.143184987885527,0.494145355308566,0.216962991775405,0.341501211819395,1.03578071460665,0.00178045685191285,0,0.00733746771428329,0.238498155711816,0,0,0.0533157176393285,0.0702002436636574,0.0197358882959566,0.0143914321837851,0,0.0521065913832471,0.0126162304888485,0,0.0885861718146948,0.413395296353232,0.0217626256620388,0,0,0.00627372223719927,0,0,0.00175960…
TCGA-K4-A6FZ-01,0.0607537058863815,0.11275521452052,0.156251349963526,0.225223902827669,0.0205062026654044,0.593039454123013,0,0,0.0463984751154947,0.0348407323053886,0,0.127698765132562,0,0.0387047622358823,0.00105107149863475,0,0.0133991102940181,0.0199015598820893,0.00570293990648969,0.0620813334903271,0.066086198013054,0.298666523683862,0,0.0631999725052594,0,0.195574034328112,0,0.02669452160…
TCGA-K4-A6MB-01,0.0367002326470078,0.128057560041419,0.213294210642521,0.0752960571637044,0.0355573014330171,0.426544862964658,0.00963958091515703,0,0.0658411111128089,0.0323573211503039,0,0.0433191149762766,0,0.0485290115569709,0.031009502299928,0,0.0397392324818861,0,0.0197858725936544,0.325675240652588,0.00618783785498538,0.317667172340393,0.00345870862095021,0,0,0.0567902934440975,0,0,0.00301…
TCGA-K4-A83P-01,0.527017101081568,0.421357737585036,0.0981679728089467,0.203315796260632,0.110038118868727,0.686544085516378,0.1260497643021,0.102201500087142,0.0633027115333175,0.116838860407911,0,0.147177519613903,0,0.0670863287184954,0.0508133245655371,0,0,0.00979072316181345,0.0224659682239386,0.0400891795264633,0.0510474877113373,0.17669363523413,0,0,0.0252272509100463,0,0,0.0012157460038649…
TCGA-K4-AAQO-01,0.0762247359483518,0.154763644840688,0.165548604212979,0.0928830004148618,0.0558579005236968,0.46230133944506,0.0500642453202309,0.0353904685863935,0.0534466467928882,0.0984411495253883,0,0.0474818409802618,0,0.0272944906591428,0.0370129779813617,0,0,0.0313881339658161,0.0707419295538432,0,0.0637610489228727,0.349881283365295,0.0120900847798902,0.0081413497858925,0.114864349780723…
TCGA-KQ-A41N-01,0.0379017936119454,0.094904796925623,0.134394539033975,0.0523056558020898,0.00241393486386877,0.275697678975905,0.000748157161181029,0.0724055902925715,0.0949701613611758,0.0449823613977206,0,0.00786050859771847,0,0.106851127540592,0.158057204801196,0,0.0200328324794912,0.0153479892634382,0.0301613910888202,0.118117783526608,0,0.0936370991211455,0,0.0552211111142444,0.173012767938…
TCGA-KQ-A41O-01,0.0511128470465544,0.0515208619863822,0.0865477860486011,0.0401410476993296,0,0.219330160911984,0.00732575193743974,0,0.273187656915354,0.257206150400879,0,0,0,0.0814035730195562,0.104221634210791,0,0,0.0494716483818926,0.0201637717108376,0,0.00104518886413598,0.0726048827256772,0,0.0230562629031049,0,0.101523105933069,0.00879037299726198,0,0.00018033353783135,0,0.0067248928279463…
TCGA-KQ-A41P-01,0.054627780653759,0.139090646029953,0.0564060605394796,0.064442522719713,0.0324897424301143,0.408607138306518,0.00650498222772877,0.0192628223664378,0,0.045976973528222,0,0.0343318208271253,0,0.0217584361287978,0.0061713942216646,0,0,0.0433968501324926,0,0.415587905591226,0.0202196803905211,0.327995537120685,0,0.0179342905260578,0.0408593069390406,0,0,0,0.0023724023440811,0.007025…
TCGA-KQ-A41Q-01,0.0213970849227878,0.0840366056310259,0.17874104543936,0.059193100841613,0,0.335040488743149,0,0.0302568076653582,0.0337495554570809,0.123583285414934,0.0241970628338939,0,0,0.0882181949574001,0.00422707578436387,0,0.0381578680085439,0,0.0357139301903581,0.141941348641816,0,0.229752770138586,0,0.170042992538927,0,0.0801591083687386,0,0,0,0.00384413068677956,0.0042878846715304,0.01…
TCGA-KQ-A41R-01,0.0439981653807969,0.0832611048916203,0.0392796704086687,0.0659239996364847,0,0.228031272171045,0.00150232106198532,0,0.0155526402609023,0.0394754561227467,0.0664724578910588,0.0233270891801688,0,0.0977741488163582,0.133811503332514,0,0,0.0481117944457147,0.0463606328248251,0.0347093431911563,0.0154078220259398,0.330675757869562,0,0.0310238743421115,0.115795158634957,0,0,0,0.00019…
TCGA-KQ-A41S-01,0.0451201377954518,0.121194246123336,0.173686138529981,0.0990176670922005,0.0691219935421998,0.465404242024446,0,0.00619703587440712,0.00464359428165509,0.10697108083955,0,0.163404643064386,0,0.0582593269078832,0.00276895818046798,0,0,0.0689853651586869,0.0593609297734623,0.0154334352161127,0.0150157336887953,0.409824619108695,0,0,0.0833567980254681,0,0,0.0057784798804305,0,0.0022…
TCGA-LC-A66R-01,0.119025121613483,0.0720436433273352,0.364758548270189,0.233864982612323,0.0236400067736279,0.651298908925694,0,0.0132000803172538,0.105299508942415,0.19799738764404,0,0,0.0940057289181951,0.074189162332145,0.0060356125556946,0.0234548996191331,0,0.0100083027130537,0.00370863431337937,0.0618941762163886,0.0790019914959013,0.208256421146268,0,0.0598851540665669,0,0.0558937545659944…
TCGA-LT-A5Z6-01,0.0525342094609489,0.118545158327128,0.0843738891320503,0.0680417714003352,0.0870307551089685,0.350091943434961,0.0323210931090229,0,0.108900011087463,0.252667629609902,0,0,0,0.151307349186225,0.0209483461247068,0,0,0.0757080586055812,0,0.0509449763144174,0.035928870472245,0.232119412585853,0,0.00462044336276211,0.0345338095418211,0,0,0,0.0108044796009074,0,0.0364037176701991,0.08…
TCGA-LT-A8JT-01,0.0684403833311971,0.118905800137077,0.133957017963269,0.0727951727372288,0,0.374753876412482,0,0.0698676603065429,0.0854091231271001,0.190198739082743,0,0.0184464315985217,0,0.223081523028153,0.071696955002832,0,0.00690364227235122,0,0.0255592850358553,0.0112116225101298,5.16178794207063e-05,0.172690189316953,0,0.108093722647762,0.016789488191635,0,0,0,0,0.0154038292778002,0.0188…
TCGA-MV-A51V-01,0.00704657421655718,0.0904867717699179,0.137740910732632,0.109078588642859,0,0.356706419680972,0.0955850595894442,0,0.00591244961318612,0,0,0.178661355115192,0,0.20576408773123,0,0,0,0.0705743499112413,0.0185086584407034,0,0.0277224655310938,0.128858008629991,0,0.0286037102884782,0,0.23980985514944,0,0,0.0121633438305245,0,0.000752368182169092,0,0,0.0227349284587724,0,0.0261837922…
TCGA-PQ-A6FI-01,0.0803315055673356,0.16707997676752,0.164631951381047,0.128270239545266,0,0.535093414123069,0,0,0.0169401419569281,0.156531401352862,0,0,0.024261470016458,0.148711504923192,0,0,0,0.108912109633831,0.0739477306373403,0,0.00498674317271244,0.13032837504154,0,0.301195218495416,0,0.0334153076194942,0,0.000769997150226645,0,0,0.00412642937418115,0.0381293010511062,0,0,0.005909823116670…
TCGA-PQ-A6FN-01,0.0996859642795573,0.184635852616657,0.0661227149397468,0.0628964806392691,0,0.48354811556133,0.0318387207530522,0.0203526103063385,0.09518543268151,0.112775559336789,0,0,0,0.111578211310831,0.0196659834643816,0,0,0.0168414390340776,0,0.269824041694923,0.0971209258469845,0.189895671330932,0.00496133511791166,0,0,0.0299600691222683,0,0,0.0104894711694386,0.00670529826518518,0.03135…
TCGA-R3-A69X-01,0.154751154122925,0.188934865762744,0.196720135843663,0.162307304973824,0.135743576162001,0.693658092849031,0.0332485552357573,0.0246192331448898,0.0196131898624677,0.0697570308586061,0,0.164072130783341,0,0.0556664618424648,0.025907025935851,0,0,0.0444370549147433,0.0636832806584285,0,0.0314470934637135,0.312975600537157,0.0451952770303371,0.00915421489290887,0.100223850839333,0,…
TCGA-S5-A6DX-01,0.0417049018044978,0.186386775081967,0.0961875757912138,0.0911046952343788,0.0592113969591077,0.422391305331892,0.00485543128184042,0.0045282700149585,0.0890746079846613,0.31900249566154,0,0,0.00508370142484114,0.0768034696639033,0.0631922236306444,0,0.00899241800448246,0.0134102056763441,0.0273338795656669,0,0.124750994163773,0.237028643564649,0.00371814481408446,0,0.022225514548…
TCGA-S5-AA26-01,0.0463467387738606,0.0949899234174699,0.0835323405915725,0.0506434764552094,0,0.261737131186114,0,0.0143625655625996,0.068590605616791,0.0211074898685744,0.0432773591912569,0.0969664565583165,0,0.130551541150021,0.0166850686896011,0,0,0.1246402013883,0.00756584864030705,0.0235649489829488,0.00792369221208586,0.291710349794535,0.0229485552181202,0,0.130105317126542,0,0,0,0,0.001216…
TCGA-SY-A9G0-01,0.110718943544158,0.183390554504826,0.164493504977528,0.109799722503145,0.0714379629157105,0.500744548449457,0.106475428562445,0.10240059789183,0.0684262282949532,0.0698561681314611,0,0.107192373247192,0,0.0315126556289186,0.0131249289160669,0,0,0.0864611385866213,0.01175358387365,0,0.00592754315087724,0.195291359180102,0,0.0198919610092112,0.17587854940668,0.00580748411999016,0,0…
TCGA-SY-A9G5-01,0,0.197239308264946,0.189315319989926,0.19425961836868,0,0.717611991127788,0,0,0.0261927707343826,0.208607910290602,0,0,0.066254448506045,0.167684713816747,2.59118393780493e-05,0,0,0.0658988619482209,0.0136083110184946,0.000574950547781407,0,0.241149808315783,0,0.185030209924801,0.024651314226112,0,0,0.000320788831651874,0,0,0.0181113991532178,0.144245187655242,0,0,0.0458126700202…
TCGA-UY-A78K-01,0.239778411960677,0.292376770828965,0.178818950845459,0.106199137114701,0.0309078583675674,0.583885793000809,0.0244783225203117,0.142996520955945,0.036811862425227,0.15238892097809,0,0.14537159872578,0,0.0396186451215599,0.083547263961682,0.00839788003485935,0,0.0444563259023627,0.0117396545209324,0.0367913402124921,0.0909570187181093,0.174705471872509,0,0,0.0077391740501397,0,0,0…
TCGA-UY-A78L-01,0.0219767767561348,0.262497769163541,0.0205280857323874,0.126554741418025,0.0227512491946788,0.581338574619698,0,0.00749133274532102,0.00643527949299037,0.0380134884049379,0,0.0476827851319042,0,0.0506982462002202,0.0414885956815091,0,0,0.0379311855449639,0,0.199459605453228,0.0401163617967406,0.40596842836212,0.00324463953243868,0.0304016921075451,0,0.0234387544116262,0,0.0676296…
TCGA-UY-A78M-01,0.0721620597623091,0.12387697262409,0.0696871986483574,0.055098353258365,0,0.369869737101098,0.00803643938019002,0,0.110394200782941,0.0995854174488822,0.0427692517894825,0,0,0.0336693793101175,0.0100475034309528,0,0,0.0174336601016507,0,0.401808491233421,0.0262592427021971,0.230825107239149,0,0,0.0191713065810158,0,0,0,0.000953854264764381,0,0.0131028150951565,0.0118199081269884,…
TCGA-UY-A78N-01,0.0410783150174447,0.125805806664786,0.136007719424468,0.0447227353996664,0.0330581216737437,0.298423354433858,0.0167210731421081,0,0.0111455457169003,0.114510730589287,0,0.146167135337149,0,0.0915799750032815,0.0987084321266692,0,0.0470665617535803,0,0.0922994773953473,0.0357780106613865,0,0.155496897914691,0,0.0143285970410846,0.175821115392771,0,0.000376447925743972,0,0.0025969…
TCGA-UY-A78O-01,0.0496261028682828,0.0857904094283408,0.112132628012152,0.0599015891139872,0,0.326763098676045,0.00146088150161731,0.0587019551424874,0.0908656166798339,0.0615495549936006,0,0.0826236516603847,0,0.0842050032965609,0.0565766431978417,0,0,0.0226060594560857,0,0.288393586595799,0,0.153805936851686,0,0.0703158702489362,0,0.0288952403751662,0,0,0.000287448262867451,0.011550406390902,0.…
TCGA-UY-A78P-01,0.0734822038390342,0.154371368913223,0.13462337266574,0.205358286494068,0.0319497993649656,0.657572285835011,0.0138071232728596,0,0,0.116334114215357,0,0,0.0317309543818818,0.0931365085113915,0.0242056643380735,0,0,0.0420359117478147,0,0.357558614516994,0.0617344858689536,0.218483866121183,0.0200752273608343,0,0.0029899326320925,0.016983865865942,0,0.000923731166623081,0.009329519…
TCGA-UY-A8OB-01,0.225668829425174,0.0821890097508577,0.121710443900383,0.0830744606876416,0,0.698629106399045,0,0,0.00217199264030479,0.240689791023525,0,0,0.115566990819259,0.0492239304147625,0,0,0,0.136352073790381,0.00945453937182069,0.0716609186832078,0.0412590866159163,0.152740784301954,0,0.0387455585044121,0,0.142134333834457,0,0,0,0,0.00042884346967593,0.0475223733187322,0,0,0.022817825623…
TCGA-UY-A8OC-01,0.031574984477404,0.138847721957004,0.217734671979882,0.0994131141739133,0.026469937602977,0.55212696616323,0.000407058429324438,0.00543613838046615,0.00828534136415955,0.0149442807076683,0,0.0299672891894556,0,0.102290197869174,0.0266504530436243,0,0,0.0574613901065822,0,0.564616618848894,0.0066733970333347,0.166199864907769,0,0,0,0.0141530056049772,0,0.00291496451457063,8.962884…
TCGA-UY-A8OD-01,0.0595975466551636,0.15281719452415,0.0616778023988096,0.0709438100504648,0.0123645752987335,0.389037533060061,0.0161135458915392,0.0378108455793746,0.0488617784638317,0.097355385960039,0,0.0929228466358498,0,0.0938491967808071,0.013982848839865,0.01551883826566,0,0.0392383470350519,0,0.225240979074789,0.0518754555052276,0.203574707480462,0,0,0.0636552244875037,0,0,0,0.00675163760…
TCGA-UY-A9PA-01,0.0831726348878074,0.187950870014063,0.152881524202787,0.22446870785145,0,0.570847393911411,0.00095494617210902,0,0.00112048883223492,0.220106287013001,0,0.0914137365948342,0.0171403381766773,0.15164979637381,0,0,0,0.0787305835708248,0.0113131830134727,0,0.0653399916785337,0.127839872598734,0.0052290456884188,0.115601743881886,0,0.110817578132105,0,0.00274240827335823,0.0004180526…
TCGA-UY-A9PB-01,0.0914487971832901,0.267526598018337,0.1097232645624,0.227503048838086,0.0527324624754603,0.805846947353485,0,0,0.0826260400287128,0.155279849170052,0,0.0415015124999937,0.0389568177138295,0.112794017190924,0.0323318922073875,0,0.0155277799141026,0.0327650174589122,0.00561303916258847,0.0788650526790187,0.113465455397451,0.278531874823192,0,0,0,0.0117416517538366,0,0,0,0,0.0716144…
TCGA-UY-A9PD-01,0.0127985628377751,0.123443447890143,0.191836132135789,0.0478219446356085,0.0126951091141141,0.357541327842492,0.0308265411904708,0,0.31166829635875,0.0118632925517513,0.0245730618275166,0,0,0.0845919453191214,0.0215866595190454,0.0214077676711488,0,0.01750827093407,0,0.281735324249326,0.0783183158077508,0.107923137913281,0,0,0,0.0079973866577675,0,0,0.0063045457516657,0,0.0637414…
TCGA-UY-A9PE-01,0.0376828810643839,0.0978857688600134,0.126148750865187,0.0563611760684481,0.0339545615694765,0.322106431919807,0.0202589870872905,0.0272481079894747,0.243470787947894,0.0544381291065612,0,0,0,0.0512487549574585,0.0241778409390471,0.0276118414433769,0,0,0,0.0899238710482639,0.0183496058991163,0.298395572687297,0,0.035555737544558,0,0.104450903190118,0,0.00486986015954415,0.0038818…
TCGA-UY-A9PF-01,0.0726605585208217,0.0815144396881978,0.158981694715396,0.0928937538336402,0,0.42462013829798,0.163593606105565,0,0.0248386324694647,0.0782379585111689,0,0.119586405261741,0,0.0680918619144955,0.0272966712469256,0,0,0.0750286732904113,0,0.023635461830698,0.0568385572860208,0.220327741599671,0,0.0643352387001472,0.0781891917836899,0,0,0,0.048567824899848,0,0.00737411675949114,0.023…
TCGA-UY-A9PH-01,0.121049644459917,0.18089946382542,0.124647828385822,0.173269557922526,0,0.680741957653448,0,0.00782151528800327,0.0416912665033791,0.175595880066011,0,0.0387365437916413,0,0.0718530489077662,0.0628779808713706,0,0,0.05236163514944,0.0317957904839651,0,0.0962760830730989,0.360875551836307,0,0.0380440784059721,0.0220522003899548,0,0,1.84252330905788e-05,0,0.00557843771731655,0.0297…
TCGA-XF-A8HB-01,0.0527970442916759,0.063457098175344,0.164757489353277,0.0717510974883739,0.0305534970584944,0.374456661052023,0,0,0.0280360347864949,0.0376645434755865,0,0.151421592604351,0,0.102903601791046,0.00843839256833042,0,0.0229543838505491,0.0118866804493185,0.0231023054104115,0,0.00333353442906622,0.412264175377396,0.0145792159000317,0.0765216940024687,0.10689384535495,0,0,0,0,0,0.0022…
TCGA-XF-A8HC-01,0.0418943884484502,0.0866763292841306,0.0792878275394376,0.0570934578955377,0.0136810406284067,0.285201635455899,0.106421166901758,0,0.250561961407976,0,0.193169109470363,0,0,0.00474126253137323,0,0,0.0590336206980807,0,0,0,0,0.116538046072267,0,0.11911470386734,0,0.11805826581358,0,0.0323618632372611,0.00662952856188126,0,0.0156088091122756,0,0.0120335095525605,0,0,0.000295357928…
TCGA-XF-A8HD-01,0.118447666738313,0.185076957116753,0.186513570684327,0.174141552663871,0,0.743134432428455,0.0143056372867212,0,0.0749083953752908,0.241744039608978,0,0,0.0442151824355292,0.10417403854831,0,0,0,0.13112385299055,0,0,0.0302084286630298,0.14581890198359,0,0.17443230021715,0.0287630908495718,0,0.00254458805975615,0.00776154398152382,0.00843821772188932,0,0.0441849137305329,0.1425933…
TCGA-XF-A8HE-01,0.0504042903405132,0.0979200391717532,0.206735273727728,0.288933574973125,0.0225216901105544,0.467308433669414,0.0261520032873701,0,0,0.227424158630413,0,0.0249434410283622,0.0129443514496181,0.137631574506046,0.0218568700644462,0,0.00232735276311074,0.0502437478762265,0.00375861899449496,0.0264637312761202,0.098442326775432,0.178134746928384,0,0.0119032424459794,0,0.0865654144244…
TCGA-XF-A8HF-01,0.0508257195451846,0.121920897552352,0.0725258030131551,0.0495283069300258,0.0230291000329672,0.336118782489325,0,0.0209197765356326,0.0456032040130149,0.0459223557415267,0.052314286189428,0,0,0.0805958845756375,0.0809394726055238,0.015593004323873,0,0.0483826120069656,0.0215294911725776,0,0.0476913115807617,0.454126404352539,0.00519411107595814,0.00958672729996718,0,0.06836179562…
TCGA-XF-A8HG-01,0.0292520158349882,0.0758721753984583,0.104260812969949,0.0370915037625286,0.0343696826023525,0.250017868147041,0,0.00999783846992165,0.164076520278115,0.0551157056602215,0.134871180526582,0,0,0.0148299452916909,0,0,0.0149603610383633,0.0215234154595549,0.0749146045582797,0,0.0035418850215344,0.445408170493245,0.00464010464722478,0.0292767426656128,0,0.0268435258896545,0,0,0,0.000…
TCGA-XF-A8HH-01,0.0540349170528633,0.127020605602829,0.117946294260282,0.0746848302138343,0.0646256448722333,0.355690499835546,0.0317159329228645,0,0.0257499117090775,0.048342051356542,0,0.104312098748054,0,0.0857236850687953,0.0424546692670281,0,0.00732940399385359,0.0370876636146703,0.0309165977009322,0.0250694902217328,0.0736703296274965,0.415434697280202,0.023725296862629,0,0.0484681716261222…
TCGA-XF-A8HI-01,0.0904472756839967,0.133451894218399,0.116112953820348,0.0942340121347576,0,0.429909091238747,0,0.0259674558898168,0.109084772396703,0.029873624832015,0,0.269114036029791,0,0.0572657896877828,0.0820547570354754,0,0.0261127464271341,0.0143792559678687,0.0176815094583113,0,0,0.144927633608815,0.0277704098121869,0.0548567157638284,0,0.134655258474937,0,0.00625603461533515,0,0.0064937…
TCGA-XF-A9SH-01,0.0650683470074847,0.103839257879418,0.102676174320538,0.0689283894644436,0.0135685990662198,0.307788076106498,0,0.0737037363293409,0.104281056981614,0.0427954548845923,0,0.0718754590483944,0,0.0259347697529109,0.0538874485739714,0,0,0.0438750623660063,0,0,0,0.472591187824743,0.0200359139885674,0.0456911051283321,0.0395494409502437,0,0,0.00577936417128412,0,0.0122114196253155,0.01…
TCGA-XF-A9SI-01,0.341445942340177,0.387909591259625,0.379328694442564,0.264604635512791,0.0854372628902481,0.828391506866716,0.0791873105032504,0,0.0295077673097252,0.227499643495873,0,0.18268477531386,0.00349586557844061,0.096737145225444,0.0354676159440284,0.0163291513608292,0,0.0499924595804802,0.00531440716227609,0.00953945589949802,0.153476058559895,0.106158649542423,0,0,0,0.0046096945239772…
TCGA-XF-A9SJ-01,0.0848416292587091,0.129040930484632,0.190399218527023,0.0969098792769129,0.0331575007108791,0.645581854296167,0.00695486071100658,0.0111479398530387,0.0211758992594467,0.236814856157802,0,0,0.032294660877085,0.028590551171849,0,0,0,0.0905685905203833,0,0,0.171619628151072,0.364812154765394,0.00891601809086702,0,0,0.0235472944559804,0,0.00355754598607483,0.00334220272489827,0.0053…
TCGA-XF-A9SK-01,0.150087952818759,0.190752662093043,0.0480437330967183,0.129710986483951,0.117307269188685,0.579886628484952,0,0.0650336530911643,0.0431916708625827,0.0584597046453843,0,0.0929968319701449,0,0.0453389018202445,0.0638797812754261,0,0,0.0643632494035919,0.0704327919293934,0,0.0531668737864544,0.307070264906064,0.0189992888636638,0.0800131403434493,0.0344865335417388,0,0,0.0025673135…
TCGA-XF-A9SL-01,0.215463033231257,0.383134843497944,0.0376977409004993,0.135659271612797,0.112091769873961,0.542215550701045,0.152867259405018,0,0.028148364091598,0.0968896756038888,0,0.103231803532576,0.00991000922789863,0.0390549447099244,0.0727253056835808,0,0,0.0708525564877222,0.0804643763706172,0.00873547519372548,0.00893565432629224,0.17415478669505,0,0,0.154029788672108,0,0,0,0.1366297680…
TCGA-XF-A9SM-01,0.231855694342189,0.148810766642915,0.332269391227738,0.253666102705404,0.214405829637548,0.951791669049047,0,0.000644740235212118,0.0126797164804705,0.210975313236633,0,0,0.102806317601512,0.0895711029233572,0.00784455780001192,0,0,0.0279483753271266,0.0315260729874176,0.0306464888969011,0.0700755577523174,0.366082379171382,0.00202281731794889,0,0,0.0429160029497049,0,0.004260557…
TCGA-XF-A9SP-01,0.0598453077006569,0.174514596991095,0.135909829782173,0.0840150249102671,0.0990152532703012,0.442259812793442,0.00791195837621268,0.00758059419005795,0.130351320462639,0.0857325101686803,0,0.0415005654279106,0,0.049038742685238,0.022113517233955,0,0,0.0373299184593909,0.0444655348996117,0,0.0432212740344674,0.451809383832646,0,0.0222605611235315,0.0566841191056595,0,0,0,0.0041597…
TCGA-XF-A9ST-01,0.0145634115308763,0.0630119539587116,0.237793288649071,0.0756704327837619,0.0867027735500893,0.426195237038444,0.149803319273321,0,0.144615683243231,0.0140074518844255,0,0,0,0.0724635116706277,0.0404135219906307,0,0.0355398568627174,0,0,0.328082585436695,0.00605333392992478,0.143220069887619,0,0,0,0.0658006658208082,0,0,0.00841730936218058,0,0.00812582091228853,0.0007870657102860…
TCGA-XF-A9SU-01,0.0575905386675227,0.150045878523109,0.140522096592998,0.0735393808178058,0.0891752843959461,0.395598900976594,0.0276690865285105,0,0.131174769256641,0.111791828591871,0,0,0,0.10359348953803,0.0528377892101814,0.00124391816058846,0,0.029997085166937,0.0434159949994896,0.0615770965526256,0.139638453089103,0.236778522051621,0,0,0.0602819668544015,0,0,0,0.0101812500239477,0,0.0482676…
TCGA-XF-A9SV-01,0.0303395769484669,0.0646546666340514,0.208209531243162,0.0773467924716779,0.0576510851711312,0.36404789147226,0,0.0145874689277725,0.0926959580062448,0.0459903403515775,0,0,0,0.0317616852582809,0,0.0371081133294538,0,0.00219458013401743,0,0.426199992616707,0.0298216592929001,0.268355955695075,0,0,0.0364679924450304,0.0030003703310201,0,0.0118158836119207,0,0.00286183448510175,0.0…
TCGA-XF-A9SW-01,0.0649529201145928,0.176044577822845,0.230352287100165,0.141340971438425,0.208706441120953,0.463277339436971,0.0598446804971473,0,0.0663586467400498,0.0314197217400547,0,0.0841598032639699,0,0.0249198362355791,0.00606235839931784,0.00597106896110076,0,0.0238409411253828,0.0371492718866247,0,0.00231579351064856,0.481665729215523,0,0.0485085608939478,0.123972022243745,0,0,0.00381156…
TCGA-XF-A9SX-01,0.177826084840808,0.209391537086903,0.112403670604818,0.137945760969611,0.0206800553695173,0.854338202988657,0,0.00357544838914568,0.0135157889139208,0.146131452327985,0,0.047191979668706,3.97933466458909e-05,0.08209927006073,0.128718496856307,0,0,0.052599613292053,0.024379537023544,0,0.067538503159559,0.376728110559363,0,0.0351193963232002,0.0223626100788411,0,0,0,0,0.00210835046…
TCGA-XF-A9SY-01,0,0.282320804014408,0.442997128653417,0.318013860602591,0,1.04476036856004,0.00918024548577016,0,0.0295655615721982,0.108799989302363,0,0.0529309469386194,0.0328531551030258,0.022643022220567,0.00583485560884959,0,0.0220524422036811,0.0190577088974065,0,0.206644620442817,0.153715590468911,0.215537039108628,0,0,0,0.120328320090039,0,0.000856502557124586,0.00933081629970773,0,0.0300…
TCGA-XF-A9SZ-01,0.124833697554076,0.105804089472439,0.189881560203494,0.123528378786529,0.117714704914657,0.558361214891141,0.00191059493138518,0.00354956069671499,0.0125396336486228,0.0250578831290592,0,0.0122208974930432,0,0.037110620675091,0.054892427710565,0.00475538666840557,0.0386026788506274,0,0,0.326992190821356,0.00727297563008737,0.286311497789322,0,0,0,0.153176110708962,0,0.03560754124…
TCGA-XF-A9T0-01,0.0511534294814905,0.114080118458144,0.143320537753394,0.0578077808886039,0.0610112903359597,0.402785395681714,0,0,0.190777357987652,0.140243113654925,0,0,0.0756821923757585,0.050395087998389,0.0184726830865054,0,0,0.0390559750289498,0.00406765782668468,0.117721438517374,0.0826032260432087,0.270385893914565,0.00140974846706377,0,0,0.00813077738394502,0,0.00105484771497894,0,0,0.06…
TCGA-XF-A9T2-01,0,0,0.495181495160604,0.0648563529607796,0,0.510826598152475,0.029438642079535,0,0.0134711207940208,0.0251922052758725,0,0,0,0.0398839513730774,0.0388495452619066,0.00270976396909384,0,0.0675589868688252,0,0.302898011226952,0,0.279497165447147,0,0,0.20050060770357,0,0,0,0.00750701669050415,0,0.00343521037306315,0.00642415179904144,0,0,0,0.0101706283812965,0.00990684909690089,0.000…
TCGA-XF-A9T3-01,0.0831941848708557,0.246219568966408,0.113220743734416,0.132287218954742,0.0194365483034295,0.657920037203992,0.0184793455030865,0.00901916568913719,0.0232929435127822,0.0657243288887545,0,0.0312596414795323,0,0.0778739113272613,0.0239351519425098,0,0.00294778803138946,0.0446325922928858,0,0.29246012149155,0.0830831921726525,0.260971432554,0,0,0.0663203851144576,0,0,0,0.0112882830…
TCGA-XF-A9T4-01,0.0459203427138022,0.205290393968137,0.288275840037719,0.17045952956311,0.0784898022306933,0.72082319413017,0.00159165077240457,0,0.010333308356451,0.102542948061251,0,0.149934330183567,0,0.145514129199447,0,0,0,0.11783484425901,0.0105675559895992,0.124558908369085,0.145382648913437,0.144043314010608,0.0262506270406986,0.00557647876185738,0,0,0,0.0158692560825844,0.000633802411472…
TCGA-XF-A9T5-01,0.478377754256014,0,0.234487835871318,0.133579733540897,0.00544855268753733,0.966641197844852,0.0159306033730888,0,0.0519914133273871,0.16353137679016,0,0,0.0810984943404061,0.0692010925580462,0.0269853829420446,0.0209805621146094,0,0.0293744643638975,0,0.162336092669057,0.0843610815651704,0.236625152338374,0.0284984182150699,0,0,0.0238998586949779,0,0.00518600670771052,0.01066242…
TCGA-XF-A9T6-01,0.0752116229831181,0.108195201439368,0.189710605755024,0.103334499210431,0,0.509764046083497,0,0,0.00588097303670905,0.133145447653478,0,0,0.0148626690981565,0.0449812658897384,0.0475807516033078,0,0,0.0253144662314816,0.00840358359561706,0.0311790936120992,0.000687758132407583,0.444388125446525,0.0250176337305541,0.116868119953177,0,0.0968594431935846,0,0.00483066882316493,0,0,0.…
TCGA-XF-A9T8-01,0.0144115160490104,0.136452207145861,0.265079812822736,0.234033943195158,0.100643496961498,0.608940830298178,0.0127376230075537,0,0.0270196784636979,0.170076726754883,0,0.0406586407378746,0.0303012085294904,0.104092109143996,0,0,0,0.0908947380744133,0.00817452196055335,0.0588673906390236,0.153285839791126,0.233452016999436,0.0120088435436525,0,0,0.0154113144359385,0,0.043019347918…
TCGA-XF-AAME-01,0.149362489471566,0.32111574194549,0.225818691907646,0.227803141760503,0.26674265557676,0.655617392647745,0,0.109057639901126,0.0452848674040151,0.0943946389698628,0,0.138985238877655,0.000440654841088052,0.0433345691245106,0.0306766664605463,0,0,0.00769814585827218,0.0666004877063848,0.0108122203089183,0.00742719720942294,0.326913798898053,0.0152864085077334,0.0404789134720938,0.…
TCGA-XF-AAMG-01,0.0481327764917958,0.14774583444477,0.0905560956532789,0.0877561106504297,0.112820869271647,0.35646811818657,0.00497521323793652,0,0.0734272597383831,0.0839955115447283,0,0.14412280993851,0,0.105449192690018,0.0240535953728652,0,0.0426815800117653,0,0.0641597745288078,0.0696977130591825,0.0173010157065054,0.344844469498507,0,0,0,0.0252918646727913,0,0,0.00187501264053826,0,0.02767…
TCGA-XF-AAMH-01,0,0.0802804802911759,0.197885971177946,0.0461606340706797,0,0.432054401890821,0.0198231865533877,0,0.0302115810432183,0.182678206689057,0.0529642440722556,0,0.0314029153376816,0.0228159991592906,0.0491099309607426,0,0.0558957677742796,0,0.0133849768439488,0.204581704593426,0,0.319475951022577,0,0.00550810393889948,0,0.0121474320112362,0,0,0.00223086198257471,0,0.00339995123393884,…
TCGA-XF-AAMJ-01,0.0359468386363522,0.176977147279318,0.143883314637745,0.103237558568841,0.0937711156188671,0.479366201033895,0.00447359266939533,0,0.161994944105245,0.128613983050929,0.0211425966205836,0,0,0.0996918707624003,0.0236327242657163,0,0,0.0654438819690813,0,0.184061412125273,0.0509286315110877,0.156430367213506,0,0,0.0961160412614463,0.00746995444533521,0,0,0.00213191560698928,0,0.077…
TCGA-XF-AAML-01,0.216686461953517,0.0711377854329843,0.0710916104557632,0.0726513985985814,0,0.536952645459787,0.00690755022812302,0.0100609544923912,0.133694630486111,0.115550395412494,0,0.0897505443760291,0.0635056839025021,0.084696307883125,0.073865157897251,0,0.0368992609245254,0.0225510533401229,0.0533224082913674,0,0.0203948039051479,0.105994729632012,0.00221816076491902,0.0313171275189237,…
TCGA-XF-AAMQ-01,0.0454705827607935,0.185689073380352,0.167760544823526,0.159988173746288,0.0248357598449696,0.45237769594507,0.00047365415107278,0,0.070424676770334,0.207873828041726,0,0.0421082273509084,0.0538211149586633,0.157785108442162,0.0101262122971684,0,0,0.0425616178751687,0.00784628546720708,0,0.0798975430542102,0.228474301118839,0.0214470430712679,0.0622981288629434,0.0148622585383284,…
TCGA-XF-AAMR-01,0.129218756618297,0.126690088576976,0.217241792027346,0.136742073565203,0.181906822796544,0.557124631947529,0,0.0206219801807262,0.0292603483937346,0.0189474336013939,0,0.0789535884139095,0,0.0167110861964026,0.00434266977100324,0,0,0.064348819314662,0.0269787218503267,0,0.000206693073880602,0.463188225155736,0.0344149061235323,0.00791410759424275,0.222801414244336,0,0,0.011310006…
TCGA-XF-AAMT-01,0.0789660275486899,0.175659440129481,0.174292106393997,0.153053523912828,0.1962569351325,0.496789699703633,0,0.00497139293210309,0.0442104095427199,0.0498120585430366,0,0.0419683598058961,0,0.0234634073303892,0.0121127463353686,0,0.0169766149262096,0.0563169796676844,0.0181428942293366,0.126075998419356,0.00130868613375397,0.494504359539422,0,0.0213762145711704,0.0856041255615737,…
TCGA-XF-AAMW-01,0.0379156079321765,0.171683120904727,0.325135230723996,0.176026496988316,0.10823833520224,0.685989246515355,0.00712150415686737,0.0118578883668667,0.0152051207613893,0.0185226811176571,0,0.190696807313257,0.0161188993932379,0.0489800936296196,0.0184242666397993,0,0.0168902828637472,0.00665821966801779,0.0420609368386971,0.0349861395693124,0.0885182509599177,0.3618428446789,0.05736…
TCGA-XF-AAMX-01,0.0670216094434029,0.115922048038647,0.0673311477765836,0.0728095018461939,0.0764763054556469,0.32367442808357,0,0.00598620946232725,0.0629940335372132,0.0626832944873433,0,0.17981546221175,0,0.086088946452791,0.0732404653455774,0,0,0,0,0.117196481908031,0.0367821637610235,0.291820111639142,0,0,0.0833928311948005,0,0,0,0,0.00149225655401192,0.015703302732913,0.0156258409623763,0,0…
TCGA-XF-AAMY-01,0.0379694710644235,0.129798693418227,0.139044310013548,0.100218224898495,0.0914102119909284,0.424054292127715,0,0.020874102036479,0.0186886565641492,0.0441923356476159,0,0.084055162958129,0,0.0165586979025416,0,0,0.00559245293708514,0.0182648372725664,0.107619246817193,0.0892485535150548,0.0185843134590961,0.370363303943193,0,0.0446062941376231,0.103452393861969,0.0098396556237424…
TCGA-XF-AAMZ-01,0.103584602440036,0.133314673363743,0.122332949885321,0.0730541610700919,0.000301509192189743,0.360042290948176,0.17470279909605,0,0.0700802121983511,0.0884216744265469,0,0.204232388868291,0,0.0985533406223418,0.0458296752289756,0,0,0.0166701653634811,0.0193838109692474,0.00337411982637208,0.0072308170443132,0.215238064616072,0,0.0352485865401407,0.0128268485698292,0.0045354300895…
TCGA-XF-AAN0-01,0.0521003984314214,0.145052195133237,0.16275706458474,0.114061126447967,0.0866432872074124,0.482235452927761,0.0227332238204471,0.0080016596178068,0.108411896637901,0.145948484701877,0,0.0796603815964403,0,0.117516106875185,0,0,0,0.0482486695611037,0.0229817737863862,0,0.0834130509449528,0.300411437509185,0,0,0.0220317374747794,0,0,0.0406415774739359,0.0110140468728465,0.003876733…
TCGA-XF-AAN1-01,0.0714452404881944,0.12239571967264,0.0969406066282208,0.0593515523818046,0,0.367140950147928,0,0,0.146645684847096,0.123659708075005,0.0487935098450124,0.114015992362076,0,0.0384259119050489,0,0,0,0.0602767505690659,0.0345654993469571,0,0.038174115265017,0.172167218675376,0.10279863510607,0.0758281304191744,0.0446488435841004,0,0,0,0,0,0.0196058913437984,0.016532766052082,0.00652…
TCGA-XF-AAN2-01,0.0647246604379881,0.169293541531616,0.115374604395967,0.168020951108583,0,0.572626637021432,0,0,0.0315547347170377,0.196017464317458,0,0.034863869419256,0.0304348809882089,0.108818184053467,0.0092948414195118,0,0,0.124408026929886,0.0322767320370565,0.0149202106659795,0.165637311305933,0.178253082579186,0,0.0330158663022175,0,0.03795651631403,0,0.00254827895077238,0,0,0.013806902…
TCGA-XF-AAN3-01,0.104418572500482,0.134490713197875,0.158521458001431,0.124876616797735,0.10322602283995,0.474762239506011,0,0.0326217998955526,0.0541107232157787,0.0418636976228413,0,0.0691884485298642,0,0.0512184907401526,0.0636063653562827,0,0,0.0300902562508308,0.0173069275116261,0,0.0136436238534956,0.359551841725397,0.103390933321561,0.0474078112506652,0.0949639167500536,0,0,0.0210351639758…
TCGA-XF-AAN4-01,0.0401502719906316,0.234870332419182,0.221781590853344,0.263911957194134,0.179247337775855,0.710125360132046,0,0.0188376225465155,0,0.0797408970288319,0,0.0715865193521578,0,0.0221438608335371,0.00206052292966018,0.00316277452338887,0,0.0760374621545475,0.0849282752961914,0,0.112466228315832,0.300568494562163,0,0.0215951372751887,0.206872205181986,0,0,0,0,0.0188851193069597,0,0.07…
TCGA-XF-AAN5-01,0.0472175659029641,0.144144107590616,0.303594498012328,0.222946774579795,0.0401368802066429,0.602249997008396,0,0,0.0245550070185214,0.131025206207604,0,0.0413430825757504,0.118382225384345,0.0854605330287502,0,0,0,0.0852583081317231,0.00256528802697847,0.0424154004975459,0.094966101019169,0.21886541141717,0.0064182958524921,0,0,0.13701343375432,0.00233770213730183,0.0093940049483…
TCGA-XF-AAN7-01,0.0582184938312083,0.160556222535003,0.28596791548157,0.104628680061197,0.284254334047239,0.293917757464892,0.0547532898015529,0,0.00520033985977456,0.130557486123035,0,0.119806208417165,0,0.0367471789204292,0.00212701118281595,0,0,0.0685599256651066,0.03048944598094,0.0298457382819564,0.0571089165316026,0.427385516439948,0,0,0.0374189427956739,0,0,0,0.0167486502625638,0,0.0015907…
TCGA-XF-AAN8-01,0,0.0953374723119702,0.285144566893678,0.283239000760617,0.549911441065482,0.518856362955743,0.0189784319609197,0.00303389583953388,0,0.0483062803122731,0,0.0894733209228155,0.0207152132653852,0.0101543557979822,0.00803704712003059,0,0,0.0147373761664883,0.0829216256522067,0,0.0100566706840104,0.511217147627541,0,0.0023243324923803,0.103764447831626,0,0,0.0762798543268076,0.014315…
TCGA-YC-A89H-01,0.0448442015001642,0.104811520301764,0.140284397397497,0.0716109038992426,0,0.43776816742995,0.0165283401941749,0,0.058469377032111,0.0535301447725621,0,0,0.0299921877169921,0.0336693726284128,0.00144031851580461,0,0,0.072532231615167,0,0.310728984458061,0.0668185606241293,0.211702593577338,0.0256814746964999,0,0,0.118102200482462,0,0.000804213686285399,0.00413858954446823,0,0.014…
TCGA-YC-A8S6-01,0.053689862886191,0.182646617295135,0.191320786546709,0.194833292633373,0.0090881313219211,0.621583044903856,0.00177308532947331,0,0,0.0374723281348629,0,0.130076623620955,0,0.0239866098237817,0.100957337652642,0,0,0.0286012190920988,0.12781245364933,0,0,0.209703761563727,0,0.108550345529098,0,0.210635542165903,0,0.020430693438128,0.00137366338559027,0,0,0.0290309576623565,0,0.100…
TCGA-YC-A9TC-01,0.0535781336129857,0.0623777923064002,0.106513685659469,0.0904829518803479,0,0.36227468633864,0.0293509483396963,0,0.00284290812705047,0.0863493902340675,0,0.0565235777200428,0,0.0616445222302762,0.0338138323600068,0,0,0.123434364723352,0.000450635027079701,0.062091180000779,0.00735528632411508,0.206689358929284,0,0.00423805862694436,0,0.325215937357306,0,0,0.00520070416088783,0,0…
TCGA-YF-AA3L-01,0.0450616913953633,0.0970304923518367,0.0790547959856545,0.0561138537670697,0.00851669061847385,0.291613322569472,0,0.0883680963211738,0.0242276892208193,0.0164500199161671,0,0.205158592092856,0,0.0102253829639985,0.0869756326254361,0,0.0159803334561721,0,0.0453465445025447,0,0.0139676981118232,0.327251039917896,0.134096566148641,0,0.0319524047224719,0,0,0,0,0.0105837918419873,0.0…
TCGA-YF-AA3M-01,0.0818874145507587,0.125324605636407,0.172576200022114,0.0926855437295779,0.0339158376409629,0.432464426346529,0,0,0.129119407942584,0.0893692693738468,0.0561331857054861,0,0,0.034139441733736,0.0123331620765103,0,0,0.045220529566626,0.00244125304330681,0.00578110591701478,0,0.295429993267507,0.00343808816028407,0.115715863076202,0.148541913733405,0.0475384717929712,0,0.0147983146…
TCGA-ZF-A9R0-01,0.031591151268731,0.144592005982337,0.0645972630533994,0.059153678322881,0,0.333625023162043,0.0271004568287565,0.0112971494646837,0.0175765053184207,0.0907207349785463,0,0,0,0.154857469278111,0.0199410823897435,0,0,0.0506733587178695,0,0.225933103216869,0.130544709902902,0.260777774304554,0.00421331686195478,0,0,0.00636433873758792,0,0,0.00642523486978879,0.00267843598092706,0.00…
TCGA-ZF-A9R1-01,0.137915299699831,0.137825440679528,0.161982123414989,0.0930170492104227,0.055015208427236,0.377155861205629,0.0995733071489317,0.0721270588127314,0.083082704141938,0.201293554622924,0.0915552985953833,0.0464579025355295,0,0.0870222820123853,0,0,0,0.0486629783545174,0.0249703821117438,0.0176305508657338,0.0231432041043351,0.14294688427869,0.0115125958559812,0.0112697637069373,0.03…
TCGA-ZF-A9R2-01,0.093926130424293,0.075529576612979,0.124356056609908,0.0650157847688691,0.0707783342653055,0.317645255972421,0,0.0955913189833898,0.160787610742403,0.053865931681984,0.110491079487538,0,0,0.118808464279278,0.000984648403808648,0,0,0.0737400921367108,0.0600563186010635,0,0,0.205112869943753,0,0.120561665740071,0,0,0,0,0,0.0067168389803924,0.0112979348217424,0.0037849544653691,0.00…
TCGA-ZF-A9R3-01,0.0761372148250788,0.161549422173184,0.0240138990325599,0.143711753976049,0.0352239318460484,0.385475987949548,0,0.0300680743165062,0.126306562998178,0.0928277253285436,0,0.157961627040094,0,0.0782557531763577,0.0755573696078123,0,0,0.0442696481095811,0.0208267487992199,0,0,0.155527441871746,0.116604663389659,0.0760725283280854,0.0249847519672363,0,0,0.00073710506698067,0,0.009392…
TCGA-ZF-A9R4-01,0.117047880380089,0.0860781439179013,0.133448796702475,0.0848399736707732,0.0118379566983838,0.380725897963119,0.00353376060969466,0,0.0708476189515254,0.151768996893894,0,0,0.0624045575255343,0.171514071269068,0,0,0.0222046206883799,0.113948547628191,0.00842342648375942,0,0.104023489151108,0.272524375239715,0.00191744529364873,0.0122211609754466,0,0.00466792929003528,0,0,0.000719…
TCGA-ZF-A9R5-01,0.08170879919821,0.15120869412144,0.0835847206414373,0.0839855222874187,0,0.344928439346128,0,0.106318801181541,0.127541415001451,0.166287519224167,0,0,0,0.117804861352816,0.148864794885745,0,0,0.0948053035291321,0.0453387932325619,0.0205441519844518,0.00604526974079006,0.0716923860877072,0.00107528995298665,0.0460676777387041,0.0476137360879455,0,0,0,0,0.0197555555631139,0.023699…
TCGA-ZF-A9R7-01,0.10505319209923,0.309709116922536,0.168958905396105,0.166098729764181,0,0.467719147580823,0.0070461529713241,0.0315694529291174,0.0726172236210243,0.318015890675728,0,0,0.00862666417683429,0.288236403627138,0.0124298441205561,0,0,0.0973232213737576,0.00803135362657975,0,0.0501912895127157,0.10022849390684,0,0.000424621624430296,0.0052593878339545,0,0,0,0.00571217763376403,0.02559…
TCGA-ZF-A9R9-01,0.0247970624686388,0.174835535120625,0.0945180286720947,0.0619362911887803,0.0313567717158258,0.32702619485801,0.0216645006201798,0,0.250529832593805,0.0699592433608596,0,0.0681396669745725,0,0.0747733360561392,0.0115292575371415,0.0130532779479214,0,0.04426416401206,0.0020053042597446,0,0.0865451734746992,0.333283039156753,0,0.000551388564129559,0.023701815441995,0,0,0,0.00622291…
TCGA-ZF-A9RC-01,0.0969266663283474,0.118949277923513,0.180568371827392,0.0845434968056851,0.0385032278066873,0.433434586173557,0.00832282851927321,0,0.131829912051068,0.0347184098391732,0.0956311167506949,0,0,0.10044759319602,0,0,0,0.0089158595579878,0,0.12234917851923,0.0476764391367432,0.267496287442556,0,0,0.1477177048056,0,0,0.0348946701816538,0.00184250008484555,0,0.0291843840800994,0.007685…
TCGA-ZF-A9RD-01,0.104551134811103,0.167638325280184,0.303076024822962,0.190958831390458,0,0.70557877288472,0.0717326485418497,0.0067391847316677,0.0874825136159898,0.142998396039257,0,0.033756091126709,0.0208311699857714,0.0957104873514142,0.021907405134298,0.038796740387691,0,0.0502463117328122,0.000429939744048674,0.0307313550088525,0.162648535610913,0.21487658541135,0,0,0,0.0145719966802761,0,…
TCGA-ZF-A9RE-01,0.0970387290241859,0.0615355923421762,0.173911358196265,0.121096590586294,0.0802090177546533,0.342953058300753,0,0,0.184169776574431,0.0769421721789508,0,0.0583164675214924,0,0.0878437237776423,0.015699359888988,0,0,0.107524522313667,0.0192450432416785,0.015700090816609,0.0079413164936331,0.129815541478674,0,0.226877920460135,0,0.0212277512522956,0,0.0486963140018024,0,0,0.0307100…
TCGA-ZF-A9RF-01,0.176226074651161,0.128140753809261,0.358630199301604,0.136683903508725,0.182170245027004,0.764474431618376,0.0131323018601783,0,0,0.272757299095248,0,0.0741642994531701,0.0127204021413597,0.0441433786798138,0.0140485816066973,0,0,0.0848215436235323,0.0094050479299916,0,0.0593790053120523,0.263068730373943,0.00966066181793641,0,0,0.137548933815045,0,0.00514981429103155,0.008653954…
TCGA-ZF-A9RL-01,0.0444414374603354,0.082560331776902,0.129441305584953,0.0549921952601031,0.0285425926982184,0.369365730936347,0.082045257941063,0,0.198262533224206,0.0739770988726984,0.141216556884743,0.052204808725518,0,0.0755173737491537,0,0,0,0.0680227885183944,0,0,0.0205890538076578,0.120361631237223,0.13733582968082,0.020467959559641,0,0.00999910779888132,0,0,0.00614591754123559,0,0.0148516…
TCGA-ZF-A9RM-01,0.0936244433918709,0.103331796499523,0.122321090742196,0.0853101196534048,0.0121354593853239,0.408081286178798,0.04596708917218,0,0.171311136531891,0.0585669496675658,0.199947183664347,0,0,0.0228362979577755,0.165213788189517,0,0.00991124894194665,0.0803492509547955,0.0318500750207278,0,0,0.0754972802312757,0,0.101528308049654,0,0.0370213916183244,0,0,0.00411180359306655,0,0.01532…
TCGA-ZF-A9RN-01,0.198345608404483,0.0237458345745922,0.300886169155187,0.141336089184686,0,0.644859547432164,0.0381296654430793,0,0,0.205938698671393,0,0.15268550376203,0.00962871499384779,0.163780197223677,0,0.0220515252722666,0,0.132165556281875,0.00674982288274602,0.00747349613820881,0.135743469564695,0.114042242091883,0,0,0,0.011611107674298,0,0,0.0127069096903227,0,0,0.0686301444125297,0,0.0…
TCGA-ZF-AA4N-01,0,0.094373249284809,0.299526248059065,0.168518268870938,0.107395448381714,0.523381852476835,0,0.00889873726037344,0.046223049856224,0.135546903252815,0,0.0662943206348232,0,0.0659211193977504,0.018762130667568,0,0,0.0333156559340489,0.06385313601584,0,0.0914088917417027,0.246286309070487,0.108412995055622,0.0334320028335074,0.00156400091185991,0.0800807473673788,0,0,0,0.0031523971…
TCGA-ZF-AA4R-01,0.0535689222195815,0.161069355925537,0.134309763808926,0.0888036064473583,0.114001152979886,0.454831751946016,0,0,0.0813370993949397,0.0913531088395277,0,0,0,0.0861017014218652,0.010782137172276,0,0,0.0464824045008038,0,0.363643165650683,0.194621244521463,0.0961417156631218,0,0,0.0295374228353202,0,0,0,0,0,0.0296122497813209,0.0332587601153698,0,0,0,0.0313468897719214,0.0039254330…
TCGA-ZF-AA4T-01,0.0692562385235202,0.0793189272196252,0.145841640476888,0.124171689586348,0,0.378210727882744,0.0579090590081001,0,0.0686214703828156,0.019137433164123,0.0829811366664574,0,0,0.0231333137590869,0.0370272666285563,0,0.0336643749525469,0,0,0.23788112476843,0.00713527947835632,0.0211949687879626,0,0.219864827165105,0,0.188941257178602,0,0.00250848805985677,0.00642569450384583,0,0.007…
TCGA-ZF-AA4U-01,0.0893996404739223,0.0890227901435663,0.133458130071101,0.0667332137700755,0.00566966345589155,0.354056243222294,0,0,0.120775472865801,0.13313405000196,0,0.0374607136188862,0,0.230791537077923,0.0161333480402792,0,0,0.0360451319587889,0.0142956935503823,0,0.0666403908988867,0.162968357686135,0.0600789194681082,0.0177794475376015,0.103896937295247,0,0,0,0,0,0.00853111349793203,0.00…
TCGA-ZF-AA4V-01,0.111215839355306,0.0976108122397643,0.219117878363437,0.101097352261694,0.0463717182356365,0.517982331323945,0.00108062064600935,0,0.0431256992448701,0.273192813758074,0,0,0,0.157036835002923,0.00533274211137149,0.014869383675642,0,0.113689649117403,0,0.055645545873023,0.100274772141502,0.203523453090291,0,0,0,0.0322284853388913,0,0,0.000404354485145077,0,0.0161370874960407,0.102…
TCGA-ZF-AA4W-01,0.060433889612395,0.119264728234861,0.186835441408084,0.123561306840595,0.00815297524152875,0.410745688351719,0,0,0.282709981594959,0.0559091890801995,0,0,0,0.0730781808658883,0,0,0,0.166234282651064,0.0109211041300348,0.0860965971376759,0.10379423198989,0.00944339279770967,0,0.142202714140079,0.0580499835411961,0,0.00680844190937379,0.00475190016193003,0,0,0.0517492914626314,0.01…
TCGA-ZF-AA4X-01,0.072200035426646,0.110518686900299,0.0886644701734313,0.0924799702483566,0.0124955450785326,0.366546146700164,0,0.058739645896606,0.0567143806659915,0.0920317479624624,0,0.0952913285652117,0,0.0774962294619848,0.0981637297815583,0,0,0.053608336017741,0.0205139218300372,0.0838104211179544,0,0.0509546153517922,0,0.280129958232214,0.0301705708843365,0,0.0023751142321095,0,0,0.012518…
TCGA-ZF-AA51-01,0.0549593840932799,0.192984475099652,0.0826381931057273,0.163880386570711,0.0279510055194277,0.418177005932501,0,0.00698274487954747,0.110001859099633,0.110100278087455,0,0.0853601332448574,0,0.0784257038820727,0.066459197197927,0.0296940211191959,0,0.0260558718136868,0,0.140882247428527,0.114306057364377,0.216172042837858,0,0,0,0.00932185751773673,0,0.00623798552712622,0,0.003625…
TCGA-ZF-AA52-01,0.0502252775498607,0.117553485660717,0.152019588131575,0.149225177584634,0.0612641613262929,0.577928843333227,0,0.00386286876198512,0.0105451543664197,0.0493738917152879,0.0280084589628574,0,0,0.0377867504370175,0,0.0504028215817729,0,0.0669707849918888,0,0.168565179092262,0.00655112042764386,0.39265910594181,0.00379600381802095,0,0,0.169074976720321,0,0.0124028831827135,0,0.00186…
TCGA-ZF-AA53-01,0,0.146264740366042,0.164449443297924,0.128485408866138,0.147018387947232,0.815279391834821,0,0.0694766154615481,0,0.0853541593221681,0,0,0.00480428094056563,0.0465268456171552,0.0119340713088215,0,0,0.0792093587728647,0.00146666682546761,0,0.166116052244857,0.432797966926605,0.0900369229389261,0,0,0,0,0.0122770596410207,0,0.0321667183615255,0,0.0395178030141737,0,0,0.002224316065…
TCGA-ZF-AA54-01,0.10041419846586,0.130847567477223,0.471374830479344,0.196257921457036,0.49836011366861,0.787657491718814,0,0.0144434057063676,0,0.0447599074317405,0,0,0.0151869387191182,0.0574066303081635,0.0142607071473434,0.0248344084009473,0,0,0,0.134784160388572,0.0457073974270408,0.640282743854293,0.00259188868123243,0,0,0.00574181193518065,0,0,0,0.00890286713668569,0,0.0275898577535251,0,0…
TCGA-ZF-AA56-01,0.114894757769142,0.122917010082075,0.175764185615106,0.20248828468834,0.10681808291629,0.502994777772831,0.0245832449257499,0.0410440527357214,0.10022343150782,0.0268669609768098,0,0.115056367620486,0,0.0874826782510693,0.0282042305936113,0,0,0.0323527029727872,0.0363471077865121,0.00181251487230336,0.036649942882789,0.318640964533919,0,0.0316143156424617,0.0720627197225544,0,0,0…
TCGA-ZF-AA58-01,0.036997331205965,0.206476048784657,0.297472603458396,0.378469354891258,0.0536556465040328,0.969353671446993,0,0.0104866709768114,0,0.0926938401496984,0,0,0.0944756870275327,0.0541147420046039,0.00484524896307254,0.01122004130299,0,0.0329668727218004,0,0.171261684610979,0.12707665719009,0.321609825159434,0,0,0,0.0792487298929873,0,0,0,0.0103072356854487,0,0.0911077747289785,0,0,0.…
TCGA-ZF-AA5H-01,0.00208371747351463,0.29402743666869,0.170206438258492,0.175380580962438,0.00682348020270821,0.778056309850464,0.00988378134546856,0,0.0211706734891061,0.0742954888796964,0,0.129151993251339,0.0412985170155771,0.0434634968795839,0.0260554395339875,0.0136116353820479,0,0.0601332949700697,0,0.192645702898753,0.140460900812527,0.247829075541844,0,0,0,0,0,0,0.00567209334711463,0,0.012…
TCGA-ZF-AA5N-01,0.0116388685231673,0.108187838924475,0.120112680000807,0.0734985449705073,0,0.466955035382759,0.0772224486417389,0,0.233437006681535,0.0129136561507715,0.0210402001931266,0.0236312495538614,0,0.0448037530619276,0.0346403072604881,0,0,0.0749725337557188,0,0.0549975678303691,0.0158546798978065,0.154992065817668,0,0.17888634654645,0,0.0571904056204005,0,0.015417778988139,0.0071430302…
TCGA-ZF-AA5P-01,0.101090117253635,0.167312956250915,0.166882014917838,0.160155302872667,0.0358518148426908,0.516966238281893,0.12241104430738,0.0508622969269776,0.114672530302632,0.117672960039409,0,0,0,0.10311750688433,0.0224064130951103,0,0,0.00867714682363379,0.0279555583658226,0,0.109595164722686,0.171134994069742,0,0.0342769901681489,0.0726963445904805,0.0433222005652715,0,0.0011988491383756…
TCGA-3C-AAAU-01,0.0634658162938214,0.0727713255676352,0,0.0113242334647035,0,0.149167614573014,0,0.10629954390143,0.0922476558208826,0.0619097602331011,0,0.0652125716474378,0,0.0602073327233703,0.0405222737118186,0,0.000603090207635825,0,0.0237854972931522,0.121986347759538,0.0423877844741682,0.231284577137757,0.00802733883428882,0,0.145526226255419,0,0,0,0,0.0221439181002676,0.0192166820333066,0…
TCGA-3C-AALI-01,0.106564065542284,0.22962934945111,0.0591556353825576,0.100180156931497,0,0.401310487439981,0.014913980682232,0.00824431382291765,0,0.127685470816886,0,0.109795385580156,0,0.109547604032594,0.0855560669037073,0,0,0.0221352734359062,0.0118371976483603,0.208431355490397,0.142424012259977,0.111754536205842,0,0,0.0476748031210248,0,0,0,0.00753650257502466,0.00416611055623492,0,0.06452…
TCGA-3C-AALJ-01,0.102518065356855,0.228550918980313,0.0424116737017388,0.066272736555413,0,0.508932453686689,0.0122749418858981,0.0126216531627772,0,0.0845194039078382,0,0.164407025491595,0,0.0547566365746302,0.0591842040490603,0.0496201824587784,0,0.000797811084021574,0,0.211717619652914,0.102227752164197,0.216447470904265,0,0,0.0314252986640245,0,0,0,0.00520102484472438,0.00534793014022448,0,0.…
TCGA-3C-AALK-01,0.0788031845808198,0.117634295196889,0.0448996612548267,0.0796932068351429,0.0240305586604379,0.316489766037532,0,0.00758713424308437,0.135801870505513,0.0947892339488735,0,0.13944646461188,0,0.0577919904520517,0.0567425922022313,0,0,0.0802658441835414,0.0196626967259988,0,0.0653923875619968,0.215573797751242,0.0126746565722193,0.00064924174839535,0.0807986306211747,0.032823458871…
TCGA-4H-AAAK-01,0.0586870897403972,0.134953828524834,0.103472338698362,0.109405942883602,0.153317562636608,0.346768407783461,0.0132096098763056,0,0,0.0946970912566749,0,0.116457867098454,0,0.0332244503744498,0.0890548780946554,0,0.0167120733391705,0.0137292157021131,0.0317940615699115,0.0951011741618588,0.0697242668698689,0.258452739534533,0.00527400671903898,0,0.162568565402965,0,0,0,0.005199992…
TCGA-5L-AAT0-01,0.112236852950231,0.20554083715504,0.120484292269037,0.115915111969843,0.0787459543768989,0.504377311696304,0.0128899922700706,0.0195017046726077,0,0.161592176454783,0,0.0410880701521143,0,0.12334622852426,0.0354759593390069,0,0,0.0556294299513854,0.00188505566414143,0.0702469886915374,0.13769342069741,0.177736059717441,0.0207069662815339,0,0.141204627264617,0,0,0.0010033203190910…
TCGA-5L-AAT1-01,0.203022361890948,0.209948679545135,0.40154924752234,0.223699220527467,0.248385691792733,0.724127116803833,0.013532337787338,0.00229045823264608,0,0.222860432438375,0,0.112812838799082,0,0.0731755853804669,0.0559808087522943,0,0,0.0728131505778997,0.0157436583967944,0,0.114333861736046,0.220059340110595,0.0256589363589868,0,0.0707385914294754,0,0,0,0.00851992210249209,0.0014420661…
TCGA-5T-A9QA-01,0.0812781665687223,0,0,0.00480757945466854,0,0.0745711018743433,0,0,0.0333355914141559,0,0,0.130430905996208,0,0.00904382968040305,0.0936417579701549,0,0.0243212736372011,0,0.00187348767357719,0.293728141181541,0.0246975735962582,0.352446893578546,0.0244892448325382,0,0.0119913004394161,0,0,0,0,0,0.00320574476157964,0,0,0.0125429961163933,0,0.000869707372590938,0.00900513722250798…
TCGA-A1-A0SB-01,0.0386272879120896,0.0320765443005609,0.0849548331013202,0.0237653138607092,0.0674841458382391,0.152317726876329,0,0,0.0095827774508391,0.0467892902004716,0,0.223716571688972,0,0.0925593861546668,0,0,0,0.0453995024589979,0.0385738000325526,0,0,0.411298525712768,0,0.0592845478309585,0.0727955984697733,0,0,0,0,0,0.00103439934976507,0.00505060371146351,0,0.0241487687128203,0,0.009991…
TCGA-A1-A0SD-01,0.03511709876616,0.132049811232618,0.133286445923331,0.119282988900547,0.0359420756550192,0.400769841567591,0.0740374190018069,0,0.0650500217698631,0.0392493568335984,0,0.174004112154505,0,0.0456957679569254,0.00642176749258776,0.00552315001091162,0,0.0101918252856716,0,0,0.125551434315006,0.318858372245373,0.00965557569353227,0.00396651617037029,0.121794681069849,0,0,0,0.02964641…
TCGA-A1-A0SE-01,0.0927304031346925,0.0990793466677822,0.130062341380518,0.0348001596406049,0,0.244605018381362,0.0623802738112717,0,0.114281795645696,0.152499786709023,0,0.202902379112288,0,0.00662335433506034,0.0156778022023323,0,0,0.00672090736798742,0.0154937444788092,0,0.0864051131716435,0.167483572076775,0.0119384019596132,0,0.157538159067677,0,0,5.47100618233463e-05,0.0195648984872649,0,0.0…
TCGA-A1-A0SF-01,0.142986024254376,0.148258127198798,0.285661748307888,0.059765770184008,0.0127209558712887,0.415556090217633,0.0430973307078744,0,0.120124116834299,0.221876739469453,0,0.142116086491461,0,0.0593780432670174,0,0.082680796469579,0,0.0301061749715838,0.00052035174068502,0,0.0666085844800202,0.175394887684599,0.0072665793973678,0,0.0508303084860598,0,0,0,0.017398594625117,0,0.04849466…
TCGA-A1-A0SG-01,0.179220999034644,0.172143287003329,0.0730202640552477,0.0758511526048773,0.0792654110785792,0.346256804131378,0.105380262164972,0.0877114748426335,0.025413833586198,0.0858743758296053,0,0.0834862475365914,0,0.0248473006104198,0.00642608061292575,0,0,0.0267610312918489,0.00297291396605281,0,0.0549215978357218,0.343482277279066,0.00345683984683694,0,0.149265764597128,0,0,0,0.044243…
TCGA-A1-A0SH-01,0.0745535782454458,0.110699870894526,0.205298850905596,0.128187364694935,0.227944923275336,0.435492265666516,0.0452829139165595,0,0.0611749888925775,0.0230344159402451,0,0.156894612306223,0,0.00930013582060268,0,0,0,0.00443625829454624,0.0362614716314073,0.00179809447485987,0.03028318437258,0.469465373857659,0,0,0.16206855049274,0,0,0,0.0118140311580786,0,0.0159601748731044,0.0060…
TCGA-A1-A0SI-01,0.111071096145054,0.193980080246603,0.231606399063103,0.22636816908725,0.0606414672970132,0.751589297446104,0.0083479379049652,0,0.0371328958864571,0.16035595887607,0,0.00328321165588075,0,0.129344204511058,0.019111372984694,0.0192284372419742,0,0.0259870754046592,0,0.265202374468567,0.0751889416525757,0.187189773355536,0,0,0.068636244721865,0.000991571335697574,0,0,0.005278006421…
TCGA-A1-A0SJ-01,0.0614813302585029,0.0816879900943365,0.152198983595588,0.0634888301456746,0.0865664464853064,0.328969194180486,0.0771187773928725,0,0.149948994929708,0.105037926302523,0,0.204760626890386,0,0.0224209535391876,0.0104004884204009,0,0,0.00615149925320001,0,0.00120589139287519,0.0514189737381937,0.266071773027618,0.03553928093113,0,0.0630480956258851,0,0,0.00687671855602049,0.0235628…
TCGA-A1-A0SK-01,0.52594728033438,0,0,0.0848722479519747,0,0.128859523856288,0,0.00739101782600069,0.0315831289896684,0.150377612346945,0,0.153528951979677,0,0.139454200488605,0.034340369758434,0,0,0,0,0.324507953537011,0.0293930714530045,0.0519528549447884,0.00382079485768038,0,0.0528430389271469,0,0.0208070048910394,0,0,0.000993658392143859,0.00424607840348389,0.020216968760844,0,0.0206406391058…
TCGA-A1-A0SM-01,0.116546591959478,0.106367997519577,0.121415435446421,0.0969257087562262,0.179826444635594,0.346421876170652,0.00386555800048064,0.0155612161477938,0,0.084029251348938,0,0.137584180749901,0,0.0453787341051288,0.00935388252665436,0,0,0.0233254110516769,0.0460069793033257,0.0160215869325488,0.0131676709499393,0.506469549412818,0,0,0.0992359794707947,0,0,0,0.000881702274634208,0.0035…
TCGA-A1-A0SN-01,0.131859972571031,0.131868361350285,0.238900470924107,0.161750066067532,0.090018730496084,0.500784011136078,0.0611113599224731,0,0.0308891778944151,0.161456666871376,0,0.238016678125486,0,0.0534516185555297,0.0158966062128369,0,0,0.0228480307870386,0,0,0.0891425145384925,0.277863308451428,0.00406764490824643,0,0.045256393732677,0,0,0,0.0309058800424295,0,0.0156216001055312,0.08165…
TCGA-A1-A0SO-01,0.104208106387599,0.0951733249930331,0.0858967948225571,0.0635166046527255,0.0954689762869177,0.301414203934993,0.0598444982536433,0,0.118441676928341,0.0716743386783996,0,0.10890736738378,0,0.0734896252881619,0.0137306068244179,0,0,0.0228178660324779,0.0139094785457946,0.0875673624161408,0.119912722515772,0.266123456780016,0,0,0,0.0435810003530548,0,0,0.0104004333616755,0,0.02058…
TCGA-A1-A0SP-01,0.104124699565398,0.102279504842414,0.026265325116771,0.16205100271926,0,0.583398083403341,0.00598039954173889,0,0.0652190021222518,0.0542011595106868,0,0.15835159535092,0,0.0351395182798407,0.00473055266560413,0,0,0.0537942036149805,0.031882074691261,0.182750915160408,0.0601031666300281,0.236277355852101,0.0866814102725351,0,0,0.0244526117504259,0,0.000436034557218426,0.003041903…
TCGA-A1-A0SQ-01,0.0942062371388049,0.0584669879570584,0.0633586862335067,0.0282417510000194,0.0378585413979046,0.207007387006709,0,0.0290867138864157,0.0366356176631268,0.103123836562095,0,0.147204457864016,0,0.0444774487545362,0,0,0,0.0141145620425332,0.0643734357842987,0,0,0.442841937030208,0.00480466130188442,0,0.110962518102826,0,0.00237481100806032,0,0,0.005936027352011,0.0074766104330439,0.…
TCGA-A2-A04N-01,0.0995037340052086,0.0884479419776232,0.086944347958106,0.0644200037327446,0.0891797141675967,0.280420514539115,0.0259769633261459,0.0396901649546792,0.0714646849919857,0.0679306010377622,0,0.0565260848300156,0,0.0842737113105312,0.00172218662859029,0,0,0.0269296715451909,0,0.0224889119151122,0.0378510448963351,0.418708909582151,0,0,0.1464370649815,0,0,0,0.0082966968542398,0.01267…
TCGA-A2-A04P-01,0.12567382204788,0.0947407251459526,0,0.0560993043048273,0,0.21239361812447,0.0716050529309723,0.0375052958642871,0.0961813471158819,0.0740387785041317,0,0.149476788899479,0,0.162517039633794,0.023005378526055,0.00462465930911717,0,0.0355839412772116,0.00823019854280276,0,0.127526828278686,0.177435803003375,0,0.0193600734114116,0.0129088147027938,0,0,0,0.0240784703232473,0.0126118…
TCGA-A2-A04Q-01,0.358513240691642,0.243736001545762,0.495868916401784,0.336368347037387,0,1.24552559437521,0.0306146915545826,0.0278525050985396,0.0263296409873922,0.132140115990539,0,0.116492163091198,0.0318300903123766,0.111710331966144,0.0277900003411155,0.0259834129457985,0,0.0531206109179129,0.00989651317829709,0.0837277834344266,0.112122912995686,0.182917881919981,0.0174444813565535,0,0.010…
TCGA-A2-A04R-01,0.0150683665518977,0,0.0470021461264039,0,0,0.0569033416708985,0.00103891222582344,0.00251557197564538,0.00737347487533968,0,0,0.104862763297259,0,0.0136874320054851,0.0363979205564017,0.012363774551273,0.0342665479500027,0,0,0.425202354401547,0.00296517141988982,0.145138172497274,0,0,0.214187904244058,0,0,0,0.000114716228306872,0.000277768344531493,0.000814175833328005,0,0,0.0115…
TCGA-A2-A04T-01,0.0815047170698438,0.107043490687249,0.113647483390381,0.137276683146629,0,0.414503688396203,0.00584360175793002,0,0.0224445247106053,0.145993146433747,0,0.0473634563009535,0.0161463220608384,0.115989019299164,0.00416149319812106,0.0150862205309753,0,0.0908551655515726,0.00426913699643002,0.0477970429091565,0.119640151400324,0.305778068672222,0.0200755766972432,0,0,0.0385570734807…
TCGA-A2-A04U-01,0.0721048518313306,0,0,0.00172780275497748,0,0.100904521341005,0,0,0.0929744473364823,0.0877262271165638,0,0,0.000322713122544564,0.071727838567862,0.0262718874459701,0.0149306582038052,0,0,0,0.493908509803837,0.0296516060945229,0.108207556535918,0,0,0.0742785557724934,0,0,0,0,0,0.0114921825995729,0.01084347204718,0,0,3.98892194340069e-05,0.00886597814678383,0.00324735813348625,0.…
TCGA-A2-A04V-01,0.0103495097474585,0.0460239444770083,0,0.0101138646859761,0,0.148527218406358,0.0240718096928327,0,0.000579995672014958,0.0351310730905066,0,0.139127368894209,0,0.0132101347688359,0.00505957931339971,0,0,0.0450054552816874,0.020021756712097,0.221515367366814,0.0324117173146242,0.272197671257809,0.00173814934401678,0,0.189929921291153,0,0,0,0.00503535547668381,0,0.0001213238398275…
TCGA-A2-A04W-01,0.13676499783093,0.0292185634221328,0.124568237822174,0.0590109546586831,0,0.346970118030961,0.0486735385810833,0,0.0920358447533482,0.0380030054386227,0,0.107969207278538,0,0.00707586616032795,0.00549903414292621,0,0.00765761964677263,0.00119494299142467,0,0.372359363555623,0.0328268545606963,0.233824943925482,0,0,0.0528797789651554,0,0,0,0.00852159423692814,0,0.0161133163337698,…
TCGA-A2-A04X-01,0.0931308424038355,0.144577944793214,0.132684983259991,0.131163912646163,0,0.324756380835563,0.0322230310619117,0,0.00124070055574556,0.136103578643831,0,0.00289307056268514,0.0197408186271945,0.0542179762223892,0.072333592465474,0,0.00253229440616341,0.0124284320299319,0.0268019850072884,0.0439523304713383,0.2651642866903,0.227570838955032,0.0144781671860872,0,0.0883188971146281,…
TCGA-A2-A04Y-01,0.0257929068850962,0.088645227436484,0.120020053599253,0.084902412762108,0.0121806266275753,0.379366506443535,0.00365399500928027,0.00455306324901754,0.0262021678863426,0.23992385923719,0,0.0495812664222809,0,0.0588839272285406,0.0175631460146719,0,0,0.0281351048464043,0.0185536466974696,0.00109995853054,0.114854887492175,0.380328026078869,0.0135227797395739,0,0.0431441715676449,0…
TCGA-A2-A0CK-01,0.0283090838419202,0.106471257918282,0.0882468594091141,0.0521877784078383,0.0176984820735318,0.300518922181657,0.0138780692375233,0,0.0570832610398952,0.11922066064655,0,0.249272822952265,0,0.0644880907827436,0.0028350082958405,0,0,0.066355902036234,0.0177513579707256,0.00147644417002103,0.057566018481948,0.310682651566546,0,0,0.0393897128197076,0,0,0,0.0043040280384941,0,0.01770…
TCGA-A2-A0CL-01,0.375076021400517,0.873328316622298,0.613206030575087,0.554356201171164,0.0631495804438253,1.71056169485153,0.0733425304000277,0.0102626345492562,0.0326000420422934,0.155460829913879,0,0.337933948096788,0.0377349515204555,0.0136644772465503,0.0313942723901623,0,0,0,0.0243012977246235,0.0092817891734728,0.144791326200305,0.10116410557264,0,0,0.0280677951695466,0,0,0,0.1105422346794…
TCGA-A2-A0CM-01,0,0.336178078136098,0.0245172755885789,0.351404178775546,0,0.799768557606633,0.0148549179231562,0,0,0.101856498894282,0,0.186215741592759,0.0258548067017333,0.119577941997343,0.0185670185232606,0,0,0.0425505546098875,0.0305109660920388,0.129095916296302,0.146444843277365,0.182093373187409,0.00237742090446249,0,0,0,0,0,0.00893314098687706,0,0,0.0612523387715212,0,0.111982542228045,…
TCGA-A2-A0CO-01,0.0399082802522861,0.438945517206588,0.240916511876206,0.285360137638323,0,0.723426989613262,0.0447397253330726,0.0417990795608608,0.010322395735833,0.143245551188561,0,0.133668206325621,0,0.100361544937804,0.0886586932644682,0,0,0.119568317807792,0.0259593595007497,0,0.0845142358179134,0.179210177179314,0,0.00879888317422259,0,0.019153830173789,0,0,0.0414260137421167,0.0387031710…
TCGA-A2-A0CP-01,0.0334960769312575,0.0760777899956841,0.04097517833894,0.029775393704551,0,0.209496317595181,0.00360881413395489,0.0036987592006563,0.109014568547984,0.124933272530855,0,0.0689016325825535,0,0.0571086149359562,0.0275949531055524,0,0,0.0312028169820104,0.00353094900405279,0.0532943476765386,0.0600975196702683,0.153142610648361,0.0108136798168795,0,0.293057461164377,0,0,0,0.00094652…
TCGA-A2-A0CQ-01,0.106862871676479,0.0572849432190167,0.0847636549148584,0.0560601126227047,0,0.352961699495615,0.0437145359750569,0,0.0225167056593191,0.0494051042241044,0,0.092873233034407,0,0.104736956463376,0,0,0,0.0435503903049086,0.1102188422165,0,0.0222617043323276,0.481258316060579,0,0,0.00860740766016586,0.0206966400308213,0,0.000160164038434701,0.0078337056919959,0,0.00403502499463909,0.…
TCGA-A2-A0CR-01,0.204744706611169,0.576850862460445,0.403298725949056,0.212747064763343,0,0.824117586829263,0.0260197109884785,0.0227324140291949,0,0.20612776381991,0,0,0,0.134501095827573,0.0995824126514286,0.0771961192514064,0,0.0909251040124831,0.020020668840331,0.0726928728652662,0.0826979621996221,0.0931755665414554,0.00849076231990907,0,0.0658375466529418,0,0,0,0.0204106417272986,0.01783198…
TCGA-A2-A0CS-01,0.087240967744799,0.117736523770957,0.0437327463176184,0.0356255053589943,0,0.475435399469767,0,0.00246265890651684,0,0.0250559476415014,0,0.0569601805086485,0,0.0672492230941001,0.0465297419379597,0,0,0.0261722379991553,0.0109268342719679,0,0.00148439317916248,0.27641282131408,0.277859200734945,0.037253173450828,0.171633586961135,0,0,0,0,0.000523467782366622,0,0.00532594315529554…
TCGA-A2-A0CT-01,0.0112548208761518,0,0.0641047964964933,0.0438996107205133,0.0670406046824193,0.140880830587238,0.0899678832047648,0,0.0437885778404988,0.0316230804132499,0,0.0821213586790045,0,0.0403480963617231,0,0.00580743641688173,0,0.0379272188430761,0.0595137722308961,0,0.0390503191230547,0.39233621831863,0.0108468227522927,0,0.155457575543171,0.0112116402727561,0,0,0.0185801308649964,0,0.0…
TCGA-A2-A0CU-01,0,0.260446554200625,0.426046726813749,0,0,0.276123478235168,0.121844377403529,0,0.0746719257222006,0.0588345960214745,0,0.132086642998823,0,0.0636872046643015,0.00875391704660654,0,0,0.0401372730846306,0.0324093066690016,0,0.0449557780576149,0.31973006083675,0,0,0.0604460527046921,0.041516226228752,0,0.000926638561624026,0.0316989115299273,0,0.0194265736152777,0.0153063497382991,0…
TCGA-A2-A0CV-01,0.0701887306118502,0.0672000844091483,0.193007186010834,0.159342063414105,0,0.481137462213591,0.0372075134727836,0,0.0574996146869391,0.175597573401185,0,0.131071717534777,0,0.0715011290759629,0,0.0547468778797822,0,0.0274467736683875,0.0144942410547929,0,0.0943327849719416,0.273085792396738,0,0,0,0.0630159818567088,0,0,0.0165877441421773,0,0.0256343089789755,0.078284393330844,0,0…
TCGA-A2-A0CW-01,0.169197150513755,0.144142839341157,0.0230902859267439,0.0580867594459396,0,0.445066002737694,0.0218575841420445,0,0,0.0653752352991209,0,0.140333154574394,0,0.0437656698552931,0.00523050935420634,0,0,0.0311668606345694,0.0181609860224323,0.068742931574133,0.181386295064558,0.312004659488815,0.00747973290699248,0,0.104496381083441,0,0,0,0.00652349997402401,0,0,0.019511549995833,0,…
TCGA-A2-A0CX-01,0.090740668129751,0.0351517358822926,0.137506391380809,0.111510319043293,0.0985666659744849,0.515231136119145,0.0275738087091096,0,0.025023876589482,0.0509972039620206,0,0.119200008657085,0.0010874844594593,0.0604196249647171,0.00286793342622312,0.0236828875618752,0,0.0418026601710926,0,0.109931621635079,0.0877159460810183,0.421137096588374,0,0,0.0212371192424791,0,0,0.00732272795…
TCGA-A2-A0CY-01,0.0793167419769141,0.000683771167434451,0,0.00144633655269689,0,0.00501558925949351,0.0339010167061119,0,0.00506289601836589,0.100384039791202,0,0,0,0.0931177908020509,0.00928606650630688,0,0.015469135861855,0.0150423154819936,0,0.528915219783222,0,0.18647122501572,0,0,0,0.012245556504977,0,0.000104737528194776,0.00228597412805356,0,0.000341395345494852,0.00676898040614855,0,0,0,0…
TCGA-A2-A0CZ-01,0.0740383343712398,0.134539199753625,0.134128645820998,0.0879764356416385,0.026780152527006,0.485471044162358,0.0244836926388209,0,0.0832707801530696,0.0943890577264395,0,0.10102275665292,0,0.0456543816245669,0.0143309672355861,0,0,0.0153596049346469,0,0.286153493021759,0.080123168322464,0.158404593504922,0,0,0.0968075041848063,0,0,0,0.0105404014932677,0,0.0358486552015977,0.04063…
TCGA-A2-A0D0-01,0.0259074303560948,0.00172074765251067,0.123456685563635,0.128432301648691,0,0.271040570398209,0.027357247101308,0,0,0.14994701475148,0,0.0772719059120722,0.00601704700077072,0.119627775430097,0.0359272772681807,0,0,0.0540707672647227,0.0101192388981281,0.162617717716146,0.100516580403571,0.226744147280171,0.00329321156275776,0,0,0.0248732365355966,0,0.00161683287499829,0.00694364…
TCGA-A2-A0D1-01,0.0855965145179013,0.00909845727179884,0.035074091209191,0,0,0,0.0414340970090804,0,0.0904352635619937,0.0881789171123358,0,0.126173341926669,0,0.0638740959371974,0.00612213749551269,0,0,0.0395437591674383,0,0.273452938753439,0.0369863662209798,0.228780883894588,0,0,0.00501819892076547,0,0,0,0.00527582857830769,0,0.0115151766884793,0.0112278747333032,0,0.0160657277751565,0,0.00813…
TCGA-A2-A0D2-01,0.074048210302021,0.151439012109965,0.165444772289693,0.178704038962743,0.0558855572542416,0.558146183200863,0.0471773324841046,0,0.0158371501166105,0.151840369918408,0,0.0344538907264235,0.0141728462672335,0.0635357448765672,0.0138803597824735,0,0.0125985108850871,0,0.0424860781898987,0.247107065540396,0.127524938337933,0.21910911124129,0,0,0,0.0102766016335734,0,0,0.022104690134…
TCGA-A2-A0D3-01,0.113671988027063,0.110608171327245,0.122174513142315,0.0494026063656827,0,0.230109950094987,0.0568742633035971,0,0.0951887954001178,0.187868558675915,0,0.13870409598707,0,0.0790688450821092,0.00968452130726542,0.0458251345839943,0,0.0262356023057902,0,0,0.0729871136901511,0.281333724402265,0.00583143449665947,0,0.000397910765065188,0,0,0,0.017492600041946,0,0.0292768544098852,0.0…
TCGA-A2-A0D4-01,0.0355021581611382,0.0417187885368505,0.0663218332282318,0,0,0.105127123450969,0.0603379783614145,0,0.0323567945400951,0,0,0.159774466516296,0,0.0226151272621003,0.00339374358813933,0,0.0347463339627527,0,0.0222239086656987,0.132005560289088,0.00970794680371734,0.291120137406447,0,0,0.231718002604252,0,0,0,0.00806749655619027,0,0.0043262690532652,0,0,0.0213626640035332,0,0.0030237…
TCGA-A2-A0EM-01,0.105765940235803,0.0564337661518351,0.112104334137646,0.0520763631719258,0,0.360906612876576,0,0.000127580014662435,0.0204104345166118,0.0521580879536674,0,0.11898543641233,0,0.0300718290519993,0,0.0240209539562225,0,0.0280158452328257,0.0711212441614773,0,0.0336382157896314,0.375953688548006,0.0373258055708569,0.0696200904490512,0.138550788342657,0,0,0,0,2.45117631944214e-05,0.0…
TCGA-A2-A0EN-01,0.124483866445574,0.288504832478795,0.259813580953958,0.205700008994336,0.0867554685025699,0.791649993074737,0.0189584087192545,0.0285879238174632,0,0.148181045641192,0,0.215885941972275,0,0.081013530852031,0.0457490104259302,0,0,0.0153247828701157,0.0192305202428844,0,0.0858176364711558,0.233323117060486,0.0185382703310685,0,0.0893898115961444,0,0,0,0.0141538685905365,0.021343021…
TCGA-A2-A0EO-01,0.0553328992766582,0.106776286571193,0.150298602722778,0.0963661230884411,0.194479855869561,0.291904539918878,0.00361445977094463,0.0073700067336135,0.0537027619152719,0.101451380598471,0,0.219960947680967,0,0.0141545722493561,0.0110388529741724,0,0,0.027834353262016,0.00985006070015952,0.0169217774904024,0.0970884169137463,0.308523115021022,0.0049805092290887,0,0.123508785460767,…
TCGA-A2-A0EP-01,0.195948236819218,0.708770227850597,0.31813233820674,0.479112943844798,0.0257588847190828,2.00676962298509,0.0580952228565104,0.0125258951341367,0,0.086204970582589,0,0.164970640470717,0,0.0425353267466271,0.0279574797182239,0,0,0.0432826085643169,0.0279037745828581,0.222729851956595,0.0236011411487059,0.247977905542592,0.0292796260461821,0,0.00784514578809571,0.00509041086184917,…
TCGA-A2-A0EQ-01,0.350310744581149,0.239064456516063,0.466567719665898,0.205976855189005,0,0.851929300122852,0.0597904509862589,0,0.00452804646341792,0.114675315430911,0,0.224570790181986,0.0205172188377144,0.0405029841925836,0.0192324176112018,0.0500690315243138,0,0.0241042273423317,0,0.146907173627113,0.115784048963506,0.151669571459158,0,0,0.0276487233795032,0,0,0,0.0479925078050028,0,0.0036345…
TCGA-A2-A0ER-01,0.0244676129306976,0.027564639384614,0.0936396716904373,0.0212731938241454,0.0243962107157434,0.301424207395129,0.0404766403578773,0,0.0563385768593584,0.0347637108368733,0,0.179295286411012,0,0.038733148633131,0.00112911467304952,0.00943406263988802,0,0.0128164781404761,0.0269774982298961,0.00514037266843813,0.0416464818195385,0.326512241782238,0,0.0136545233338639,0.205309542946…
TCGA-A2-A0ES-01,0.0074199464940272,0.132472772247726,0.302091236006904,0.168521203687393,0.171552844567715,0.501371533227243,0.0617551661600237,0,0.0402030996672183,0.091103174798001,0,0.23772862841716,0,0.0117445237520406,0,0.00158408692319503,0,0.0311852454723227,0.00635890303591373,0,0.0724834640901494,0.303347378394498,0.0404806115971349,0.00195323654903966,0.0364095414659036,0.06366293967739…
TCGA-A2-A0ET-01,0.0236695066214651,0.084959822286924,0.105965893564074,0.090011607502739,0,0.199897705416228,0.0249536474412639,0,0.00365094245247643,0.17045556832591,0,0.0930309824383319,0,0.0747258075187555,0.00538014843459263,0,0,0.042071903679043,0.0657580388802311,0,0.04816094064673,0.385982485544755,0.0616046045236099,0,0,0.0223521500124432,0,0.00187278010185776,0.00748803128156407,0,0.0010…
TCGA-A2-A0EU-01,0.0363072099041894,0.0424082344312117,0.0730621704384935,0.0725334323104755,0.0598644709592323,0.18782239384169,0.0197759985662392,0,0.00296542345366165,0.0584895353517504,0,0.211079219569802,0,0.0663676283696436,0,0,0,0.0365183260634559,0,0.0457426298038125,0.0933521982175594,0.213500498430596,0.0333842541074119,0.015656502645672,0.194097617797982,0,0,0.0090701676224123,0.0053157…
TCGA-A2-A0EV-01,0.151056494651201,0.138700674866153,0.175281961940085,0.100262628884182,0.106526494640274,0.623860470661692,0.0300673582339422,0,0.0558092532351959,0.0830625966314742,0,0.112619953686079,0,0.0260833189289285,0.0157550353567375,0.030990285869966,0,0,0,0.140867116458152,0.0872138834993436,0.361484637194413,0.00161258179574302,0,0.0544339791100243,0,0,0,0.0128421576187674,0,0.0238368…
TCGA-A2-A0EW-01,0.122482040667826,0.182049898984643,0.399288716668078,0.204831355984604,0.248981474542479,0.63818670966793,0.0382747216121401,0,0.0159815313296842,0.129973714664344,0,0.177850489344385,0,0.0121487512227282,0,0,0,0.0380837610581191,0.0234493936842419,0,0.0454178057726272,0.39377638432971,0,0,0.106553399312337,0.0175773744710164,0,0.000912673198667932,0.0218773468796885,0,0.00913484…
TCGA-A2-A0EX-01,0.104535938137585,0.0815426135728537,0.0596126546081408,0.0239265096976737,0.011197570743111,0.264891154012458,0.0921067116392513,0,0.0740640991545813,0.0556934371609306,0,0.230633628901511,0,0.0155942915145087,0.0203791300434526,0,0,0.0317011269404147,0.00731611208559221,0.0896968097168515,0.0300044348246134,0.204857026103431,0,0,0.147953191914861,0,0,0,0.026806561798368,0,0.0215…
TCGA-A2-A0EY-01,0.0921592021100394,0.150000952143947,0.073962092176747,0.0809558325029501,0.0626002391750509,0.427313459293511,0.0271846033541113,0,0.00727476775086726,0.0893405053129196,0,0.173610726118381,0,0.0570042932392665,0.0253899126924256,0,0,0.0497915653661248,0.0457506600756142,0.0170045801897558,0.0598937535534393,0.332272940308978,0.00533476959769173,0,0.110146922440425,0,0,0,0.012284…
TCGA-A2-A0ST-01,0.324864187826165,0.539033203459111,0.488962412379884,0.513132633469017,0,1.44072791436299,0.0225712492795921,0.0774307863325112,0.0188104731479782,0.132706103076284,0,0.157459948860288,0.0209327192607996,0.089268056497887,0.048425385468531,0.0118231066772552,0,0.0296213795482541,0,0.0862788829091759,0.159896041029129,0.0793341861197111,0.0444966483319226,0,0.0187286515509664,0,0,…
TCGA-A2-A0SU-01,0.0556071207603221,0.0878297913856315,0.0944069282630876,0.0430192174107233,0.00551725549944496,0.286921331710978,0.0474871666251671,0,0.0585532219214505,0.0972767931654141,0,0.268986245356568,0,0.0114602635322059,0.0254154699009753,0,0,0.0204030676966087,0.0156411088750619,0.034696182097909,0.0345270330978676,0.24327725492807,0.0471915002795545,0.0102324959183629,0.08485219660478…
TCGA-A2-A0SV-01,0.0671921988405465,0.112460938757225,0.0163854442325225,0.12411345877191,0.0821090379424492,0.759863216360643,0.00239985440505286,0.00107965748161731,0.00985364333852321,0.0507880214699754,0,0.0729717782977876,0,0.0589586755512671,0.0630949851243074,0,0,0.0306147531483184,0.00875096110712949,0.17270450513998,0.0346046327897438,0.444142587354672,0.00171278880517559,0,0.045278827160…
TCGA-A2-A0SW-01,0.183362481212566,0.188168346238323,0.243068573710599,0.147744725918039,0,0.596649648213276,0.00667653295262122,0,0.217461235664404,0.237886688522549,0,0.0788151764109181,0,0.0353105190466849,0.0190207881829502,0.0257875475178567,0,0.0335756312545863,0,0.000532233723399518,0.0687938172533278,0.254007478470161,0.00290401743002907,0,0.0192283335705128,0,0,0,0.00367325325369926,0,0.1…
TCGA-A2-A0SX-01,0.106693793381273,0.48980143980391,0.390989497257144,0.314846905690779,0.156334657658456,1.02970477155148,0.0283089927754479,0.0223677052036323,0.0340021278843021,0.120597900651358,0,0.166363962388163,0.0107637512147706,0.0915069202371439,0.0330594824071518,0.0147965178741159,0,0.00717707373755952,0,0.222087188920591,0.115208746586711,0.118811220150824,0.00190682030572718,0,0.0130…
TCGA-A2-A0SY-01,0.142044468721254,0.137257876170876,0.137679185213905,0.0982667208679547,0.0703320596098997,0.390011673892889,0.0602749455756165,0.013813189662954,0.0478505261608327,0.103823197849384,0,0.151681404623688,0,0.0798286361809092,0.0138870027134701,0,0,0.0428766984087266,0.0475727157704244,0.029690436294822,0.0910080685593148,0.201417564798918,0.0132890713794661,0,0.102986542021474,0,0…
TCGA-A2-A0T0-01,0.0199569924724676,0.0384988480115599,0.0439820541437881,0.109915920756091,0.00327337515435995,0.36280209831767,0.0211798960327927,0,0.0087546031205129,0.0375911160796241,0,0.158332317725449,0,0.0838722413316906,0.0296132390810278,0,0,0.0457612667982774,0,0.204125650120439,0.100736486592113,0.237499297733792,0,0,0,0.0715898846790245,0,0.000944000705255241,0.00669120818905622,0,0.0…
TCGA-A2-A0T1-01,0.133513606178412,0.212105741543029,0.275075117391488,0.153886559057777,0.0418086700640904,0.887800000138879,0.0134056374027256,0.00709475039239851,0,0.142563454253838,0,0.0815415615510178,0,0.0846853139680158,0.0639993476923572,0,0,0.0338216504447517,0,0.175832238659106,0.0996079462428047,0.267197225779308,0.00573933621444907,0,0.0245115373992276,0,0,0,0.00866803514014653,0.00458…
TCGA-A2-A0T2-01,0.0065883463984385,0.0698398854965747,0.0976876190962767,0.0281789952650486,0.0329400491027847,0.295289579082538,0.0576540756015041,0,0.0455916674976411,0.167151103689708,0,0.0411927293509088,0,0.118281455290879,0.00310524644361118,0,0,0.0473146037115608,0.0107726828487309,0.0771069225917968,0.0810134584359439,0.331600666206287,0,0,0.00470471170343553,0,0,0.0145106766279939,0.0135…
TCGA-A2-A0T3-01,0,0.0738971587643518,0.0774647580983275,0.0681858665620917,0.088088935558212,0.205340582746788,0.0730371539020636,0,0.0247123392554401,0.105602200193244,0,0.0309006862895001,0,0.0886297559776245,0.0125179347535558,0,0.0143138395924301,0,0,0.319832160075542,0.0653601123699468,0.242314795564581,0,0,0.022779022026071,0,0,0,0.0174059257854079,0,0.0058893469978416,0.0251666988804647,0,…
TCGA-A2-A0T4-01,0.022735108058817,0.0954874338997563,0.197578829795909,0.130795419851808,0.0572278604750038,0.545608679285316,0.0294405859866112,0,0.0280527985618293,0.0760555856333953,0,0.153408832510185,0,0.0376545123045343,0.00838421913002146,0.00981015816257259,0,0.0442055135212174,0.00432701580633677,0.108156390026863,0.0870270984830745,0.241168425723677,0.0075278393526617,0,0.16478102479702…
TCGA-A2-A0T5-01,0.0568234145667131,0.0761086044214643,0.0208377592701261,0.0288627351069385,0,0.166725416656755,0.00779101253650478,0.0147501967179318,0.0220982910058182,0.100476055015855,0,0.0662855500475101,0,0.159826271412376,0.0434263397834143,0,0.0155059060100218,0,0.0164850709583329,0.203398290169976,0.055014366925205,0.218182429416535,0.00665403102115539,0,0.0701061889793636,0,0,0,0.001647…
TCGA-A2-A0T6-01,0.114631813677466,0.213070579987378,0.36248718197182,0.295149491465784,0.214189999385236,0.774237010401558,0.0751470154844315,0,0.0120000933260512,0.0781617917572877,0,0.15412009561909,0,0.0630717700152491,0,0.0156519993117782,0,0.0424770221807993,0.0290063195029574,0,0.0485925558822848,0.236743763346129,0.00942177265454736,0,0.212050174011823,0.0235556269075711,0,0,0.059434158064…
TCGA-A2-A0T7-01,0.077332720273907,0.162734664503435,0.189397841276763,0.140016097722948,0.144825823770378,0.572119685398312,0.0582574396089295,0,0.022850519096466,0.108692108399271,0,0.167853126074103,0,0.0222106866803469,0.00915281573471452,0,0.00377148609674423,0.00150838776626903,0,0.131419801129101,0.0545766165619053,0.371092671557904,0,0.0027193055804292,0.045895035713816,0,0,0,0.02507977945…
TCGA-A2-A0YC-01,0.0408394950722842,0.128218118893151,0.0486884029068295,0.0995562218419388,0.0398485899410428,0.339153753070046,0.048731353971944,0,0.0266747282183162,0.0628690258439846,0,0.0912183437761885,0,0.0345214504580476,0.00950802563498346,0,0,0.0220187407860404,0.033941861799416,0.0675303993295894,0.0310316645137609,0.381152883579398,0.0404606424350589,0,0.133240630622968,0,0,0.017100249…
TCGA-A2-A0YD-01,0.130418420307681,0.224108462657447,0.209848779475921,0.269337661227882,0.0731259667459571,0.871231268474068,0.0204823668810349,0,0.0299878128286383,0.173454973228145,0,0,0,0.0964449898128246,0.0249145685524981,0,0,0,0.0277015794459984,0.0841387520833729,0.0652268540068989,0.378239406704583,0.0137461279980801,0,0.0811635174460189,0,0,0.00449905101190658,0.0143785470887692,0,0.0210…
TCGA-A2-A0YE-01,0.0626989910450252,0.048564930761035,0.192855273094868,0.0755893860821404,0.102335291387461,0.368211543653831,0.0378316196203796,0,0.141733410343704,0.0423428553573018,0,0.143230267027558,0,0.136018674358284,0,0,0,0.05974242521774,0.0105698748080949,0.0562378630423075,0.110419489147081,0.24591936483321,0,0,0.0159541562443393,0,0,0,0.0108587231847009,0,0.0406814163493237,0.01215357…
TCGA-A2-A0YF-01,0.141741737730817,0.0416452071577273,0.179417367029468,0.15204660189555,0.213724907928227,0.429833821154525,0.0465428420973479,0,0.0361410380781562,0.00140955703403618,0,0.100059020730592,0,0.0143752223029515,0,0.0070611863656559,0.00264773546629824,0,0,0.297205990003862,0.0496604317754537,0.406709096466825,0.00919010880218352,0,0.0156065709684967,0.0133911999081413,0,0,0.01314527…
TCGA-A2-A0YG-01,0.0907757984542438,0.0956991114815634,0.0834587811284643,0.0750033256272814,0.0556494314045496,0.351494896876739,0.0916856714503477,0,0.0548365049806788,0.0216795137145216,0,0.155920416787932,0.00181174598711614,0.0623620625446698,0,0,0.00876770536673877,0,0,0.0633521829613172,0.0571680500928726,0.441922389381322,0,0,0.0338966570249785,0,0,0.00659709970750487,0.0261989451218626,0,…
TCGA-A2-A0YH-01,0.00732328965295225,0.178806190087028,0.1162915939745,0.204511498908024,0.241855150214257,0.767565771978676,0.00566822760381576,0,0.0798677236378703,0.0896419477162478,0,0.0188291623491105,0.00257541131469094,0.0793478938841093,0.0249740945078286,0,0,0.0122432779371722,0.0264750263589087,0.0247882268951376,0.078933542826191,0.41164431466652,0.00222387000326503,0,0.125666740498058,…
TCGA-A2-A0YI-01,0.156179310323511,0.217115629684979,0.40528251829961,0.273025217529142,0.327653387378295,0.783515377093368,0.0280099974236088,0,0.0528059681364021,0.0443914432428038,0,0.156231024316353,0,0.0413457483028968,0.0225066428307779,0.0417176053786551,0.0127866113850339,0,0,0.0858092867390309,0.0854110970168285,0.363872620041635,0.0176669681884207,0,0.0412485763088994,0,0,0.0061964106886…
TCGA-A2-A0YJ-01,0,0.134488238926834,0.0834615965146742,0.0641160806240611,0,0.414269686900628,0.00213986325668091,0,0.0170647120325353,0.0759096838556287,0,0.12609026542443,0,0.0271806495523367,0.0113200705184997,0,0.0396748804169806,0,0,0.458961102788997,0,0.194760059162251,0.00184686180899,0,0,0.0421023794333699,0,0.00294947174929951,0.000294591031108327,0,0.0023492674578789,0.0104503462865297,…
TCGA-A2-A0YK-01,0.276756356750687,0.457067217792377,0.632990376271344,0.344476168710873,0.133381352899188,1.02152916252321,0.0952516063288091,0.00750542883697093,0.0302519582286659,0.206165891160563,0,0.189678602416514,0,0.0786176882823235,0.0166429527310835,0.0353471878911561,0,0.0159318989378418,0.000759874674811597,0,0.0928896009245522,0.138348155477462,0.0374644520654673,0,0.0532982310617128,…
TCGA-A2-A0YL-01,0.12961535872852,0.15544898696842,0.309870866697607,0.127462587177307,0.129126438427257,0.507436262158724,0.0320535351866859,0,0.0549724406260486,0.203799727928574,0,0.173434220305785,0,0.0542724852860785,0.015721495086861,0,0,0.00109267965669044,0.0327544120419944,0.0232608261579613,0.117296040299402,0.250101091870484,0.00784773491033587,0,0.0333933106430995,0,0,0,0.0167452165759…
TCGA-A2-A0YM-01,0,0.1723815598818,0,0.346688298796754,0,0.757344453533221,0.000313544606042476,0,0,0.018135839707654,0,0.0850525975693648,0,0.057178944081748,0.017715983497738,0,0,0.0112730885322915,0.0204768320780691,0.40879214207037,0.0461171844337171,0.172573426257993,0,0.0503865059573887,0,0.111983911207624,0,0,0.000184665428350385,0,0,0.010681295559121,0,0.0500926313506153,0,0.03367614686392…
TCGA-A2-A0YT-01,0.0112246737374875,0.0678999556089395,0.0623889975842154,0.053090115790859,0.0150926839705049,0.29022426932296,0.0379237918673559,0,0.050749935142951,0.13533069869859,0,0.110875565788163,0,0.0132342320373619,0.00466309279701053,0.00792409864983942,0,0.056264252209421,0.0303219544733479,0.00988141279247679,0.0592399382209812,0.413875086002315,0,0.040844621130009,0.0154770708382669,…
TCGA-A2-A1FV-01,0.00180228473793949,0.021325968554034,0.0590519322175168,0.0298197031177899,0.0566285968256833,0.0643533672015775,0.0953368752463818,0,0.070274879702261,0.0144425347597163,0,0.104330827231662,0,0.0565195972111333,0,0.0230517012184359,0,0.024976315720352,0.00656260704908624,0,0.0367240204038602,0.330718823627874,0,0,0.236006084394607,0.00105573343463086,0,0,0.01580733165058,0,0.011…
TCGA-A2-A1FW-01,0.00142567397732779,0.0374961984169912,0.173328395505675,0.0747923876054114,0.221348885874844,0.258926662210885,0.0612533628233308,0,0.113867214469575,0.0385244554617366,0,0.277188928324073,0,0.0101652985769319,0,0.00248520719393378,0,0,0.000994443063602961,0,0.119678911283521,0.312305437540826,0,0,0.0635367412624689,0,0,0,0.0178153166249621,0,0.0331178630115191,0.0112046970194047…
TCGA-A2-A1FX-01,0.0349512349336641,0.101188646444705,0.0936087454129496,0.144597262529745,0.0990342783871467,0.34530357705062,0.0246804707626165,0,0.0014350835219112,0.0812092044661365,0,0.129595081501414,0,0.0329948304520238,0,0.0132276503799264,0,0.00457813790218398,0.059405501629266,0,0.0496902903421465,0.433655699225605,0,0,0.164459724890992,0.00506832492577826,0,0,0.0104633777630932,0,0.0006…
TCGA-A2-A1FZ-01,0.105084835380988,0.169820839387453,0.229503850628454,0.152006886284732,0.361666820391776,0.722590047233978,0.00359701607244489,0,0.00971060220162336,0.0847501697311932,0,0.12705456534886,0,0.0413530551203099,0.0079244243659287,0,0,0.0232332398532987,0.0165837808093003,0.0161054643614023,0.0631730955492684,0.471820759367849,0.0583644651857124,0,0.0763293620328097,0,0,0,0.001786716…
TCGA-A2-A1G0-01,0.0920534497182088,0.164975558784229,0.236997650239281,0.164417792575573,0.0896841648985185,0.52972672612117,0.029599909960798,0,0.169634340350593,0.066507383860812,0,0.166331242877911,0,0.0391461050157301,0,0.0215506525768728,0,0.0339375607597451,0.0137410891565187,0,0.0655043662196798,0.264796854419549,0.055610227658331,0,0.0500967624629159,0.0235435046805427,0,0,0.0179200770996…
TCGA-A2-A1G1-01,0.0167940830735574,0.257894703874137,0.224553077548424,0.331468509228362,0.0605780696741581,0.886484949239494,0.0209662412469132,0,0,0.00721164291116868,0,0.177999448886147,0.0295603268816906,0.133386086008553,0,0.0192518598693125,0,0.0416495843816029,0,0,0.152310049125812,0.351568835939465,0.0106901780783114,0,0,0.0473737645371535,0,0.00803198213386987,0.0117118067587204,0,0,0.00…
TCGA-A2-A1G4-01,0.0637274704284819,0,0.114596371700415,0.00336989556952926,0.659692011699227,0,0.0663975956364606,0,0.156232835686013,0.0714584107401811,0,0,0,0.129971205557602,0,0.012597772037983,0,0.0252039731247459,0.00186878556822925,0,0.0667485860035956,0.421466924715223,0,0,0,0.0480539109299669,0,0,0.015701400197226,0,0.0369452275122219,0.0168981586416545,0,0,0,0.0307349971488308,0,0.002979…
TCGA-A2-A1G6-01,0.0366823520303446,0.0932651790815951,0.329449881153965,0.136833159565517,0.218792588461726,0.450245204180074,0.0459358987528779,0,0.121155361882959,0.138164360587567,0,0.150479281458775,0,0.0278530471128145,0.00292532391406052,0,0,0.0136736782784876,0.0298295751352433,0,0.00987051207239173,0.322147333430246,0.00394390637927553,0,0.101137184189717,0.0328845368055845,0,0,0.01974522…
TCGA-A2-A259-01,0.0494691431489258,0.199834939354535,0.103682694782984,0.187389902076179,0,0.506587028147694,0.0791927883688721,0,0.0140464327848074,0.0345044733910754,0,0.222100065945767,0,0.02044228872092,0.0319088631259694,0,0.0187228752333057,0,0.0477549247790003,0,0.0672750209220908,0.163430352393759,0.018412669047407,0.0210193474091026,0.261189897877923,0,0,0,0.0548830996606731,0,0.00973462…
TCGA-A2-A25A-01,0.123078877084515,0.195985763435216,0.377904761924732,0.212123360907398,0.155108836734916,0.717272151574185,0.0615854242520298,0,0.0388517988576299,0.119972028319545,0,0.189947610185624,0,0.0293500171069018,0,0.0196443089441802,0,0,0.000460424667951185,0,0.109274875015863,0.273536868580882,0.0250900512590329,0,0.13228659281036,0,0,0,0.0418784582447998,0,0.0264194564859394,0.081581…
TCGA-A2-A25B-01,0.0485366515659856,0.113359515773803,0.065002279020512,0.116697079296258,0.0631182420764161,0.458506298834921,0.0242566524063717,0,0.0367018938198918,0.0814429280306216,0,0.208849406275658,0,0.0452510800600644,0,0,0,0.0128712310683012,0.0680099283370556,0,0.0934747850099178,0.392855602358918,0,0.00485758537901877,0,0.0256832294608093,0,0.005745677793371,0.00846526238579576,0,0.012…
TCGA-A2-A25C-01,0.0982589068495175,0.172500755703484,0.169863415317855,0.141523289872122,0.00252923660677334,0.566413219082572,0.0998535029602528,0,0.0608479114315995,0.0350135102095384,0,0.188520273728087,0,0.0577464882567124,0,0.0145820952754601,0,0,0.0091736686494912,0,0.115691050310972,0.347456274956832,0.0142630000240934,0.00683074353746044,0.0500021929990232,0,0,1.92876604768898e-05,0.04396…
TCGA-A2-A25D-01,0.0943417251161518,0.171948717439671,0.179547572314726,0.103029035482136,0,0.463277018151618,0.0429067641370353,0,0,0.191979297980877,0,0.0832450335253098,0,0.0794864244076036,0.0374991199239048,0,0,0.012195793049638,0.0269247886560963,0,0.156792144734901,0.22550949128389,0.0203299971061673,0,0.123131145194577,0,0,0,0.0220282652102988,0,0,0.098561869576165,0,0.0427378692571443,0,0…
TCGA-A2-A25E-01,0.0976663717530123,0.053758983543205,0.109802711889035,0.0613081278869556,0.03744368399538,0.303744471225018,0.126220304941978,0,0.0609773859439984,0.0420901866690689,0,0.111736625367288,0,0.0734339297414896,0,0.029560580036477,0,0,0,0.0288939623523928,0.081359169131237,0.412187628465546,0.000488363770310225,0,0.03125344663479,0,0,0.00179841694542329,0.0356094469168677,0,0.0172030…
TCGA-A2-A25F-01,0.263239414945461,0.883584415129328,1.02893179035284,0.791051829557797,0.300282992766148,2.63706607760573,0.048556697215546,0,0,0.106691657844254,0,0.250090927538659,0.0580766358413353,0.0393202396640081,0,0.0476051211321054,0,0,0.00666593925594585,0.0984848810698959,0.100181927121141,0.20558107668279,0.0124553674479705,0,0.0244619226404162,0,0,0.00182760654593218,0.07714571494252…
TCGA-A2-A3KC-01,0.19143766077976,0.238270498938524,0.214024151678402,0.122479189660447,0.150988500797811,0.621504023137466,0.00346259143426498,0.00289392248409104,0.0525424304411462,0.0578539849081236,0,0.122533776937043,0,0.0738053229387085,0.0327613114046138,0,0.0118482706018364,0,0.00474813448080152,0.0260351515102137,0.0574328593683048,0.465122317345266,0.00567464703476166,0,0.083285279110824…
TCGA-A2-A3KD-01,0.0165975175771825,0.0818704067483784,0.0965208602195764,0.0480483201528418,0.0937345703043856,0.229698698493381,0.0985336608579551,0,0.0807361709441421,0.0599033875927213,0,0.147591077638978,0,0.0243644384059464,0.00727139829407073,0,0,0.0309825029482655,0.0268314579370796,0,0.0349607686342309,0.419020849831147,0,0,0.0118709260386011,0.0555754500823499,0,0.00235791079451255,0.030…
TCGA-A2-A3XS-01,0.0541410878033528,0.240957452436803,0.0164223772436443,0.0516769601033456,0,0.367899654112892,0.0420095301892133,0.0340399423227959,0.0178230830860627,0.121583890395961,0,0.167901423385598,0,0.113296525965481,0.0765781280376002,0,0,0.0420907291516211,0.0415038645817647,0.0315264175167957,0.0655458240264062,0.221155389038508,0.00132229325536789,0,0.0236229590468249,0,0,0,0.0209905…
TCGA-A2-A3XT-01,0.0193485626250917,0.108053419407609,0,0.395394142681002,0,0.73423569864602,0,0.0262522032983037,0,0.0338234010385758,0,0.0721846659971046,0,0.0425933903262783,0.0534422308386918,0,0,0.0462095824847444,0.0308388628375728,0.437402937429221,0.0824380768076434,0.150955357628353,0,0,0.0238592913135105,0,0,0,0,0.0130727306421639,0,0.0168429371872096,0,0.0359455808090472,0,0.02121010235…
TCGA-A2-A3XU-01,0,0,0,0,0,0.0613391142694844,0.0817390088574402,0,0.224717368170021,0.0719659416373913,0,0,0,0.120019565306754,0,0,0,0.0451259330562829,0,0.144944875048461,0.0101241174023303,0.259085909251605,0,0,0,0.0422772812697138,0,0,0.00511125948571367,0,0.0140519049070789,0.00450013533298368,0,0,0,0.00750499853399606,0,0,0,0.00282179043530954,0,0.00906361451958801,0.000633075832830208,0.016…
TCGA-A2-A3XV-01,0.00339956549105614,0,0,0,0,0,0,9.4117704103558e-05,0.00289936359622341,0.0664308415026447,0,0.0489736145160616,0,0.0814398929321032,0.0143053369318732,0.000377902177971512,0,0.073045384291956,0.00591517599160769,0.165827731476288,0.0407486219660455,0.432811172481465,0,0,0,0.0671308444316566,0,0,0,7.63783782203838e-06,0.000235289089826398,0.00539099416641588,0,0.0039743056717696,0…
TCGA-A2-A3XW-01,0.0200754944270057,0.181817630908461,0,0.0259825805684308,0,0.526009078113182,0,0.00559139220969916,0,0.127842438079506,0,0.113555624702962,0,0.0140188635240416,0.0617178635114717,0,0,0.0709112404159982,0.0248770835804829,0.112008783291122,0.0126937165807957,0.251869443752808,0.0895732535473991,0.0115348569335269,0.103805439870187,0,0,0,0,0.00212316412835227,0,0.0485443461005407,0…
TCGA-A2-A3XX-01,0.0613689474911733,0.153062789799648,0.0385038186768961,0.0706003245315587,0.0221323841746664,0.430509408691545,0.077503051387415,0,0.0674817109194023,0.0588597051440682,0,0.0220249606022448,0,0.11042126941468,0.0503730378669499,0,0,0.0207935060987036,0,0.252633541652353,0.0769691347015153,0.234873059380009,0,0,0.028067022832659,0,0,0,0.0329512478746485,0,0.0286905682254424,0.0250…
TCGA-A2-A3XY-01,0.00170020925249044,0.346699631266621,0.049301046849298,0.234868445997968,0,0.670831642771651,0.0239327559281121,0.00241142611247397,0.00988609851196813,0.0321345965849905,0,0.206666987688612,0,0.0956900626162006,0.0314374425855177,0,0.017930562783063,0,0.00204580323009554,0.260839192613161,0.130356728479111,0.175013099945645,0.000551437278150925,0,0.0111038056428977,0,0,0,0.01709…
TCGA-A2-A3XZ-01,0.449643408591032,0.447070895389888,0.0105545123805443,0.137942489561091,0,0.856976160146864,0.12082073742793,0.0298489414029415,0,0.0789745924952754,0,0.223141644086266,0.0126020502904742,0.0485394618992066,0.0558835431867521,0,0,0.0395453839321682,0,0.00863211234269224,0.0797019765986456,0.249589851526097,0.0116313873748317,0,0.0410883174367187,0,0,0,0.103908882566231,0.02567084…
TCGA-A2-A3Y0-01,0.0228269863187103,0.0900823668957241,0.00372163101951144,0.135797066012475,0,0.746953640779305,0.00852831114598533,0,0.011544435246722,0.203303991303319,0,0.101616559901387,0,0.178983434789703,0.0533366339016249,0,0,0.0754485388777816,0.00609059724205264,0.0957097867246734,0.101415218490077,0.14790135747223,0,0,0,0.0129805521050353,0,0.00314058279940905,0.00372126860846977,0,0.00…
TCGA-A2-A4RW-01,0.0907524028409587,0.207380236656985,0.126784909935368,0.0938493016430468,0.15950981097426,0.376749828340464,0.0150456802010178,0,0.0392639825326335,0.1345003698924,0,0.0910147978848538,0,0.0436997030364885,0.0143447105903072,0,0,0.0485401163074056,0.0138842884446958,0,0.0613206321011532,0.258772451868686,0.00497040711957767,0,0.274642860020781,0,0,0,0.00831321981592417,0,0.021694…
TCGA-A2-A4RX-01,0.137164278588342,0.366674514079477,0.158367132906999,0.216736161104629,0.0189506375341928,0.716333139358325,0.0471268273645272,0.0947391011475995,0.0155908661768505,0.0852891899689263,0,0.072453440842575,0,0.143931313647691,0.0361260394118723,0,0.00130841598615638,0.0103820936066647,0.000524290723271096,0.206116864456092,0.130172550657023,0.145800949709233,0,0,0,0.010438056301517…
TCGA-A2-A4RY-01,0.135747960146515,0.2869899952842,0.159464396108172,0.148611228637287,0.0757757651049102,0.568063697925782,0.115136850643161,0,0.0375705593041908,0.118643540240552,0,0.131900051884094,0,0.154817576034499,0.00473123587102704,0,0.00994982856356187,0,0.0854817926813766,0.0440148753112501,0.0721779382494053,0.149454041080547,0.00760234932397417,0,0.068519360812361,0,0,0,0.076301926249…
TCGA-A2-A4S0-01,0.0690426302945396,0.054780843262722,0.0400876505694441,0.0318728458234505,0.0154866179373038,0.20564268122906,0,0.0312075732058354,0.0454642505618756,0.01330535014483,0,0.0489692622403363,0,0.0759083437439124,0.0212434178273448,0,0.139624084447515,0,0.0454379355377134,0.0274811476354385,0,0.318034560264424,0.00336477388800435,0,0.22995930050277,0,0,0,0,0.00594957557676613,0.00866…
TCGA-A2-A4S1-01,0,0.158418502557653,0.364810147665271,0.264528015858667,0.749537385911468,0.600628513132535,0.00572734445344273,0,0,0.0413244760109023,0,0,0,0.0191702892457574,0.0229698133978154,0.0208403618771673,0.02120672889621,0,0,0.124992798109924,0.0219940534378633,0.704601196243001,0.00107969608951797,0,0.00989598271201791,0.00264468008043667,0,0.0035525794459436,0.00204531480903597,0,0,0.…
TCGA-A2-A4S2-01,0.11567617432604,0.232200522335291,0.278510002441447,0.19290854909522,0.0172755031371657,0.618064188149166,0.0269747947264646,0,0.0210275941295946,0.154816982077996,0,0.12716634961954,0,0.0592617039646178,0.0643207341021083,0,0.00358470424237433,0.0110288361142631,0.0414361160460743,0.168992202190548,0.0786489306371466,0.208253040750292,0,0,0.0344880113989801,0,0,0,0.0171596593701…
TCGA-A2-A4S3-01,0.0776511027610689,0.15309341709516,0.0113194114859411,0.0643038219008003,0,0.379596401392714,0.012037579573245,0.00785443632600535,0,0.126614534526868,0,0.111656350652237,0,0.0782412549742597,0.0936240676761588,0,0,0.0444406111766228,0.0103732830026221,0.178684419708089,0.101845533271094,0.18753448382585,0.00811730097154967,0,0.0389761443153998,0,0,0,0.00511699955770446,0.0033388…
TCGA-A7-A0CD-01,0.0407256058616397,0.0461090708034757,0.106119290158427,0.0290643792831551,0.0204169385496176,0.165460544898972,0.0444404186061901,0,0.0608358479968574,0.060312704372656,0,0.0563278127285033,0,0.011767574958673,0.0341878140531648,0,0.015485102945303,0,0.0431389292337414,0,0.0304089400997548,0.395743786048319,0.00144434176538385,0,0.245906727191453,0,0,0,0.00672161527878474,0,0.009…
TCGA-A7-A0CE-11,0,0.13722775374473,0.198323975023425,0.127306039462433,0.258511196056149,0.386844384509205,0.0295445166455542,0,0.0849330273203229,0.129975963604183,0,0.0232216530101626,0,0.0288854133038934,0.0197213788744581,0,0.0106234982449318,0.00447839857156518,0.023198011030314,0,0.0130450557672769,0.549331027381471,0,0.00512032047187816,0.0779217357739891,0,0,0,0.0151741558685346,0,0.04362…
TCGA-A7-A0CE-01,0,0.0388807403484758,0.120533713434876,0.128444628162656,0,0.272088815425563,0.0716384020106958,0,0.068606357682614,0.0831669812059987,0,0.0347626260180964,0,0.0551054822072837,0.0233402691836054,0,0.000379675821506606,0.0357429212744997,0.00894473645758095,0.150112157020456,0.0762786550110726,0.269830912609284,0,0.0570024613100939,0.0650883621872124,0,0,0,0.0194227125272513,0,0.0…
TCGA-A7-A0CG-01,0.123907257188492,0.189664066310594,0.329348516274297,0.140219721714125,0.107856428316437,0.518502612047953,0.0438550123793924,0,0.065430516930428,0.0962177172651056,0,0.245167943107362,0,0.0428721984751236,0.00552868340797113,0.0347288949205956,0,0.0219857007227283,0.00297836920829967,0.00549564522052678,0.0723974863163455,0.24457970463695,0.0104844203980472,0,0.108277707011125,0…
TCGA-A7-A0CH-11,0.0379380653241552,0.189077337924051,0.263460400450738,0.129655663815169,0.178512272447204,0.67970831355384,0.0214132023539709,0.0478776946937061,0.0708962481335847,0.0671951213666888,0,0.083960285382344,0,0.0378053570024744,0.0257478535097832,0,0,0.0916920146365911,0.0362764621380451,0.00968221414972535,0.0145685626500487,0.450961884417262,0,3.16638602694612e-05,0.038035283490939…
TCGA-A7-A0CH-01,0.0606034918236609,0.0682209560630476,0.10240642685899,0.058903396950299,0.060343490903314,0.221647797710774,0.0342459445390518,0,0.0182990075838468,0.023978014091768,0,0.140251210630293,0,0.0826533803750913,0,0.0374431748432422,0,0.0515793156268969,0.0140718328295766,0.0088837236997172,0.0430831044989237,0.437377482277619,0.0136497397585905,0.0124630905290061,0.0658882790101227,0…
TCGA-A7-A0CJ-01,0.0526450299876735,0.0315303002464309,0.0413515264861229,0.0523126608533158,0,0.108934091038919,0.0588416771878132,0,0.00348471605005945,0.11622718824807,0,0.1291859558812,0.00962597319872692,0.10355283688589,0.0270466945515181,0,0.0260713595612462,0.00670019730377508,0.0167896011831242,0.182042722167282,0.0443568590059608,0.219262541743592,0.00390261518170596,0.00722525982617912,…
TCGA-A7-A0D9-11,0,0.16425617355762,0.371789188035975,0.180079843591414,0.194024159240629,0.906419822620426,0.0371781782432994,0,0,0.0202562734318276,0,0.122796997059024,0,0,0,0,0,0.0467327713611207,0.02887055545745,0.0106860044121308,0.0213488449230324,0.556895514468157,0,0,0.0568234913516624,0.0429033043350093,0,0.0555080649572873,0.0132001191934113,0,0,0.0071919937003004,0,0.0435990969531764,0,…
TCGA-A7-A0D9-01,0.0541503569426882,0.0359512293404164,0.109346234484786,0.0134284191579585,0,0.340630170860226,0.0371752607993267,0,0.0866868691016533,0.0336926576624979,0,0.0787444386663362,0,0.0279742315492539,0.00547613495401291,0.026693798013388,0,0.00155277312161032,0,0.206470543277374,0.0202839026282087,0.441484148564825,0.00261866807541761,0.0118824979536137,0.0192640756324819,0,0,0,0.0067…
TCGA-A7-A0DA-01,0.000324272708497308,0.142278678308443,0.0291016164185507,0.121078770943842,0.0179983005291847,0.348484830357623,0.0352333385775978,0,0.0440937816051795,0.0204424276420414,0,0.0621177975392028,0,0.0314612088511909,0.00449281891059065,0,0,0.00875302402070744,0,0.397061927098341,0.0466846029782196,0.300745220419495,0,0,0,0.0489138523574343,0,0,0.00880604655763164,0,0.011020581908866…
TCGA-A7-A0DB-11,0,0.198835681656715,0.257124619615879,0.162421140821624,1.01682837806423,1.01338537611674,0.00812081499040299,0,0,0.0209155599033871,0,0.0937568476256877,0,0.00573653994884351,0,0,0,0.0408407959351151,0.0330410237675908,0,0.024337938128071,0.703684869120294,0.00591866957930927,0,0.0636469410012981,0,0,0,0.00313154186485175,0,0,0.00806544066595228,0,0.0361544369380834,0,0.002212119…
TCGA-A7-A0DB-01,0.0492952678195146,0.0883877881708386,0.0959334915787048,0.0372577592449106,0.154231844168532,0.411629288527324,0.0247888867065202,0,0.0178145012622181,0.0214731448786608,0,0.066336533719994,0,0.00485656987291378,0.00293848473222191,0,0,0.0113122634655894,0,0.310586541992448,0.0226653867319742,0.350485243796055,0.0388224030595914,0,0.127920039781813,0,0,0,0.00609009636661923,0,0.0…
TCGA-A7-A13D-01,0.0144283890906908,0.118568423709167,0,0.0522277479114954,0,0.284998004968198,0.0276736924402173,0,0.0429675666607181,0,0,0,0,0.0399016787290752,0.013871401012669,0.00916524320998147,0.00207718623649096,0,0,0.785400388358177,0.00513292835510489,0.0447854493384123,0,0.0160324972313164,0,0.012991968427837,0,0,0.00402398823728674,0,0.006247846513474,0,0,0,0,0.00580204055532723,0.0020…
TCGA-A7-A13E-11,0,0.187070032501307,0.294840806574281,0.173582273364661,0.463628934139996,0.631184505146613,0.00753539828038957,0,0.0366406982165372,0.0269370832541947,0,0.167243529962081,0,0.00793071847717672,0,0,0.00861118170860543,0.0360400496850228,0.0558819528049582,0,0.0274369931624028,0.570107493508496,0.00251906609584095,0,0.0446890307105573,0.00842680413373722,0,0,0.00326484347685434,0,0…
TCGA-A7-A13E-01,0,0.0618374601315627,0.117579277340846,0.067227377956129,0,0.332545979389194,0.0263786008396867,0,0.0648752844703039,0.0836052257844247,0,0,0,0.0465207473543806,0.0137297570731833,0,0,0.0156158670181784,0,0.503652170100587,0.0366793451893314,0.205263770347766,0,0,0.00367923182215794,0,0,0,0.00512300853101659,0,0.0125994793208843,0.0162370357523581,0,0,0,0.00903483042994442,0.00266…
TCGA-A7-A13F-11,0,0.144230873368127,0.358678538256569,0.139968687087276,0.237253881755404,0.532683834705876,0.0505041001997497,0,0.132250316064958,0.114530761932355,0,0.0685911324603122,0,0.0176921670855617,0,0,0,0.0597421287899617,0.0139563810674682,0,0.00513516632187395,0.482988284672036,0,0,0.0268109989122648,0.0277985624934584,0,0,0.0206453819586285,0,0.0540621113634639,0.0468186011978078,0,0…
TCGA-A7-A13F-01,0.0527985157996459,0.0701327706945857,0.017284726082601,0.0325692964551045,0.0383180077483654,0.295302896774353,0.00179701951759593,0.00469621953812554,0.00984514317061697,0.0268500332309855,0,0.0818898748156518,0.00561049059521157,0.0204905672116796,0.0178127890128404,0,0.0335381615865785,0,0.00907374147949392,0.0482959352280042,0,0.522124556563792,0.0162668650253783,0.0142053439…
TCGA-A7-A13G-11,0.0140269716993313,0.157249528828694,0.226741147998658,0.0626731517000936,0.210938609890596,0.414220954480098,0.0880111127619108,0,0.0218681569941302,0.0124681561397232,0,0.102144250974587,0,0.0102051316189503,0,0,0,0.0566358900082835,0.0238946944916601,0,0.0216238516485252,0.544370214891945,0,0,0.096933553453955,0.0218449870163295,0,0,0.0164066801431262,0,0.00407657449000731,0.00…
TCGA-A7-A13G-01,0.0710578038160266,0.0734302830339483,0.0317129257201781,0.0320730106653186,0,0.133949216439514,0.104299419042206,0,0.0760203212740415,0.00409966344900951,0,0.040491616063367,0,0.0683782040452637,0,0,0,0.0447893754867252,0.0741827629567925,0,0.0272909049527754,0.301845861710237,0.203859574163856,0,0.0374088144654169,0.0173334823903094,0,0,0.0144122690529942,0,0.0105046157855701,0.…
TCGA-A7-A13H-01,0.200358138078142,0.240770836004181,0.171896512154514,0.218030258178875,0.0834136309854677,1.03014368505872,0,0.00455676243827401,0.0400078795759594,0.0733477821014143,0,0.064747857041389,0,0.0203876422837316,0.0281123873851467,0.00122711072934175,0,0.0240564256680651,0.0134700279612782,0.425644783368311,0.0763008242215382,0.178978218736549,0,0,0.0491622984890018,0,0,0,0,0.0032949…
TCGA-A7-A26E-01,0.0863091158164769,0.0584939266365649,0.196615546350554,0.133209769982981,0.147071412807038,0.362081760480593,0.0586603292444534,0,0.0147693255034331,0.0364584146817381,0,0.145474028301949,0,0.0323174324603544,0,0,0,0.00552642301913072,0.152295433038177,0,0.0472628081568253,0.40424395662618,0,0,0.101772611909959,0,0,0.00121923705780026,0.016502023412104,0,0.00415483101403975,0.010…
TCGA-A7-A26F-01,0.0306168771207534,0.143470650712324,0.197151671651134,0.407352492713559,0.249536060264563,0.807416009794237,0.00910804102891261,0,0,0.0839647660836795,0,0.130607867779521,0,0.0487054307992675,0,0,0,0.0223446208960248,0.025542752947003,0,0.0733332253159567,0.435107441130239,0,0.116380746729752,0,0.035235047135791,0,0.0196700601538531,0.00658618172083243,0,0,0.0607163720298176,0,0.…
TCGA-A7-A26G-01,0.176295946311093,0.162968001209283,0.409863194080529,0.276699166799522,0.301334670057817,0.817860410647199,0.0290029536590906,0.0184536351598989,0,0.0349191048038007,0,0.225320296015568,0,0.0629512162807653,0,0.0438908744256965,0,0,0.00131473251839292,0.0196659595093349,0.166752450766581,0.312661997777183,0.023554001129446,0,0.0615127779542434,0,0,0,0.0206492793234848,0.013138464…
TCGA-A7-A26H-01,0.025711988497172,0.100320689170113,0.0910460876707162,0.117156047842506,0.0450918652474814,0.462097227388351,0.0255436319468481,0,0.0339634656380219,0.0588225651073497,0,0.166037420223436,0,0.0424837554174013,0,0,0,0.0258463743589198,0.00772349921898186,0.126053625284013,0.0946645647558145,0.366649458512028,0.020364696188465,0,0.0115019060027803,0.0203450373459409,0,0,0.010849169…
TCGA-A7-A26I-01,0.0210438182704908,0.113129512062284,0.0967431088805332,0.128933188770024,0.294250450015139,0.670011310196432,0,0.00360723231299717,0,0,0,0.13593091023093,0,0.0578343577546752,0.0300922071397738,0,0,0.0309572750203844,0,0.333340764918755,0.024889262588127,0.317314942778096,0,0,0.0660330472562614,0,0,0,0,0.00104047344415286,0,0,0,0.0392080382029225,0,0.0166817959538008,0.0086798242…
TCGA-A7-A26J-01,0.0383482479081883,0.124016867197704,0.0889267310893015,0.148157544829478,0.104543331310047,0.378295294831498,0.05239258438846,0,0.0126875318489314,0.0211748181249562,0,0.153024241495226,0,0.0574289608101121,0,0,0,0.000765139852655435,0.0919107122707784,0.046445493730127,0.055830560565027,0.466942517921025,0,0,0.037843395917172,0,0,0.00355404307552957,0.0183519067725733,0,0.004444…
TCGA-A7-A2KD-01,0.0712350812699396,0.170818581947572,0.152170098698727,0.187712695730142,0.141081636100523,0.575023835848858,0.0651971597945023,0,0.0330246227932687,0.0548091522975494,0,0.188384901109741,0,0.0567066898364149,0.0509509261400317,0.0136186239389279,0,0.0130904870671093,0.0137316987660227,0.0306779755400325,0.0844954009869786,0.35010194235051,0.00147396048106803,0,0.0424604812904544,…
TCGA-A7-A3IY-01,0,0,0.114629421263343,0.272797314888612,0.0860642853312727,0.596014130699798,0,0.001940440710589,0,0.0107072225378757,0,0.0159241050077516,0,0.0369950487098195,0.0233671400212102,0.00340860409959967,0,0.031167635990761,0.00293061055389672,0.299657714987224,0.0235500778389159,0.301137242329112,0,0,0,0.249214157213245,0,0,0,0.000718553417904445,0,0.00396492987849073,0,0.005896763564…
TCGA-A7-A3IZ-01,0.0309548300996608,0.00621125244305288,0.0401950887997181,0.0541563129131732,0.186979522750208,0.0786186152581369,0.030995273713922,0,0.0141555650121774,0.0516881185200417,0,0.0505509504213518,0,0.0229421568375682,0.00332242204444832,0,0.00618832632514764,0.00640322079542998,0,0.0419437890012581,0.00752570737989215,0.454767121018379,0,0,0.307331949247755,0,0,0.00218539968262932,0.…
TCGA-A7-A3J0-01,0.150080968370643,0.128473806518336,0.0387966441935239,0.0401731281064273,0,0.347265605076156,0.0444673886039342,0,0.00728328249076208,0.133879512269458,0,0.119535288925106,0,0.0682441272944931,0.0502262102067927,0,0,0.0515307178362213,0.00674519103047364,0.107671608212861,0.151717795888617,0.25551223073945,0,0,0.00318664650183035,0,0,0,0.0168034887895252,0,0.00275223168094107,0.0…
TCGA-A7-A3J1-01,0.271155778498677,0.451608962014077,0.279823214859528,0.227143685660108,0.149194265225975,1.00699693756895,0.0543823114190242,0.0154914502650038,0.0249927723252348,0.126518370058465,0,0.263778547259093,0,0.0429999596812938,0.0217311964499259,0,0,0.0080254067668675,0.00591897309687831,0,0.101747312573142,0.288474842303317,0,0,0.0444383431709522,0,0,0.00150051463080356,0.05257297034…
TCGA-A7-A3RF-01,0.0878982791265743,0.00456497675314645,0,0,0,0.0816542397003895,0.0318573138981633,0,0.0320264149926724,0.0477710443718487,0,0.0457647926424738,0,0.021765011597354,0.0179363561222078,0,0,0.037208754163862,0,0.271561223266909,0.0298857064833589,0.331655473884089,0,0,0.127902010857041,0.00466589772002008,0,0,0.00383341964208106,0,0.00385376773103988,0.00574833334672102,0,0.005506919…
TCGA-A7-A425-01,0.105018629353715,0.183158383772232,0,0.104937754634856,0.107397438397832,0.465071246190974,0,0.0147983115476907,0,0.0632177482008992,0,0.135127087974117,0,0.0516793881606039,0.042887412828133,0,0.0329415239665628,0,0.0786090339167418,0,0.0225964572913487,0.482653745629014,0,0,0.0749347356006139,0,0,0.000554554884275395,0,0.00654423611925975,0,0.0279566942364551,0,0.05975705856446…
TCGA-A7-A426-01,0.0601624614715921,0.186074827568818,0.151493621842403,0.0788430352779159,0.0249552900316316,0.369399866506257,0.038197923620792,0,0.0601730234444468,0.15780932605123,0,0.114376039000144,0,0.108593406674445,0,0,0,0.0678916212658944,0.0140312261053727,0,0.0324287818060037,0.216393304824461,0,0,0.190105347207211,0,0,0,0.0185527491920436,0,0.0292260653530422,0.0766480627444428,0,0.05…
TCGA-A7-A4SA-01,0.0338361700449732,0.277219464682021,0.198092970789007,0.187952734035656,0.045636052146122,0.621111721471535,0.0279071663006652,0,0.0195069392888437,0.196045281484389,0,0.188783894772382,0,0.0799419389866995,0.0499164118047881,0,0,0.0219854054419239,0.0321604594230235,0,0.074823417558429,0.239309851267002,0,0.00501792222052424,0.0646013114513289,0,0,0,0.0176366103864098,0,0.012327…
TCGA-A7-A4SB-01,0.0613645609228813,0.0714710909881028,0.061302058644136,0,0.013932224923244,0.109346415555586,0.104970684152239,0,0.114738394789334,0.117038629036999,0,0.00191423208127143,0,0.0729152162048017,0,0,0,0.044459131140083,0,0,0.0569803015519792,0.339982822411976,0,0,0.147000588631317,0,0,0,0.0183724711960448,0,0.0200820626289355,0.0204846606285643,0,0.000335038054288551,0,0.01276196988…
TCGA-A7-A4SC-01,0.0622507716568442,0.170331896629704,0.144177903989979,0.121016421718841,0.0663963063844051,0.441895345948475,0.0458855654080421,0,0.0684287571903062,0.144973014588135,0,0.17109283940302,0,0.0381003371979032,0.0147622597021272,0,0,0.0197821666964624,0.019209717854591,0,0.0471748418495161,0.327181385470904,0.00316082895521445,0,0.100248285683778,0,0,0,0.0218919988114142,0,0.0326473…
TCGA-A7-A4SD-01,0.149229192154844,0.287372071830882,0.0192845070861875,0.260008245822008,0,0.790155984075022,0.0115252377519446,0,0.0847332577806105,0.162110962760962,0,0.0598374271742703,0.0193987170244665,0.120850883619038,0.0349333289628997,0,0.0201830977491153,0.0274072449272056,0.0271116664457243,0.183761002520945,0.152691230183632,0.0775720228646474,0,0.00621310153514029,0,0.011670818699398…
TCGA-A7-A4SE-01,0.030650070777351,0.182389612593934,0.00939228643785366,0.185614434225872,0,0.588709145588582,0.0170536933345674,0,0.00917291978697315,0.0288182674386655,0,0.0159922486257074,0,0.0691900774831462,0.048858630741416,0,0.0118394281942428,0,0,0.444022734197621,0.15095535288866,0.171744348095062,0.0119802424108658,0,0.0203720568030733,0,0,0,0.00782325551074763,0,0.00420800901395498,0.0…
TCGA-A7-A4SF-01,0.14889988737655,0.127898098398942,0.0823330804233982,0.00420885751688125,0.0138826490125839,0.336129728390366,0.0482551038097842,0,0.0199225614362534,0.0797289130165726,0,0.13318306596317,0,0.0660998775012947,0.0382526870877065,0,0,0.0163761159656,0,0.17994115126291,0.0805369360947693,0.242743854384213,0.000735564839413041,0,0.0942241686383126,0,0,0,0.0157532702818443,0,0.0065038…
TCGA-A7-A56D-01,0.0185305312843571,0.0287080312244585,0,0.0158114558086143,0,0.18884150500861,0,0.0111822478557233,0.0631986085580876,0.0212685045465137,0,0,0,0.0645814249287724,0.0184710699614128,0.0029569885822926,0,0.0644036028532288,0.0175349623411541,0.329963023064941,0.0214218935234273,0.324717804137274,0,0.0283875417082373,0.0319123279389345,0,0,0,0,0.00192949707997743,0.0109049211075261,0…
TCGA-A7-A5ZV-01,0,0.0864564028386606,0.0139154913932383,0.0333648566244827,0.0958849781692176,0.473958591047126,0.00828323629673967,0,0,0.067164617854833,0,0.0275541453645168,0,0.0210251604018175,0.0108242973335667,0,0,0.0319983128648391,0.0504584368958436,0.210379304406601,0.0176413277181059,0.490098551154655,0.00998153798185045,0.0331196091018974,0.0144454390151916,0,0,0.00702602360954182,0.001…
TCGA-A7-A5ZW-01,0.0289239377103999,0.120863815761455,0.153842124255306,0.112460707036281,0.138318380424338,0.358420375472573,0,0.000645263957474388,0.023635355333859,0.11352672890641,0,0.120810829626105,0,0.0350007670639722,0.0202284180943594,0,0,0.0172711223276863,0.00329960638303637,0.104335430104984,0.0385395612430004,0.26821515728414,0.0140288252104144,0,0.240462934464559,0,0,0,0,0.0002806459…
TCGA-A7-A5ZX-01,0.0473360468244665,0.121767262643109,0.081551721548308,0.0517521573459958,0.100412858834372,0.260726888886034,0.0697669701337012,0,0.122840336108113,0.059160406578624,0,0.022636570112638,0,0.0633304348636184,0,0,0,0.0131196651511906,0,0.0368368451977005,0.0220551720316307,0.33691924196779,0,0,0.252534664743671,0,0,0.000799693111323131,0.0193145957366884,0,0.0340076604665539,0.0163…
TCGA-A7-A6VV-01,0.120547028864225,0.25353723908228,0,0.175872861040338,0.0887005052912994,0.770624460873446,0,0.00777363295462127,0.0216960763217759,0.0169167506212151,0,0.116885744930115,0,0.0254150873520823,0.0139401759217444,0,0,0.00438594608545963,0,0.464034915901805,0.086417015432707,0.225394423223483,0,0,0.0171402312549912,0,0,0,0,0.00335755694999104,0.0093708838926347,0.00730661634670573,0…
TCGA-A7-A6VW-01,0,0.00914100894845834,0,0.137999851877035,0,0.275454862659834,0.0213011269537698,0.0219900141663148,0.0188873455038859,0.0266628309413714,0,0.0238263338393832,0,0.0934937767426491,0.00932157102238342,0,0,0.0465448311169591,0.0513103322134825,0.157445976209397,0.035906027635078,0.268805290957294,0,0.160234967480058,0,0.0608188342088789,0,0.00345074100909442,0.00580472760741654,0.00…
TCGA-A7-A6VX-01,0.044332579345535,0.12943967882778,0,0.0721856311916915,0.028472539494003,0.34723679101073,0.0353222950052771,0,0.0400195885602923,0.0526916719259856,0,0.0175181092771296,0,0.0952137976789354,0.0243948568852507,0,0,0.0406795681764502,0,0.211774907905558,0.0582961527458509,0.379781431658027,0,0,0,0.0428767351441925,0,0.00143088503705108,0.0105130630378994,0,0.0119111302711869,0.015…
TCGA-A7-A6VY-01,0.300273940893684,0.11185344223888,0.0300308956862225,0.212371406240857,0,1.12623855255956,0,0.0057590686406249,0.107112770761899,0.0485811809481729,0,0.0676092566008572,0.0166023301462048,0.0857447591118496,0.0137449091058607,0,0,0.0321996049853404,0,0.215675159255549,0.103269659623192,0.260493969561381,0.00261906135814834,0,0,0.0405882699009195,0,0,0,0.00361480632751738,0.067231…
TCGA-A8-A06N-01,0.00548143617495715,0.0194397924522413,0,0.0244099181814784,0.0972845688020639,0.0465334809755462,0.00249030044277582,0,0.0256306518277462,0,0,0.117663236328098,0,0.0614886800867054,0.0172602052976463,0,0,0.092489144208643,0.0193433640030004,0.0996149022993669,0,0.407911718683086,0,0.0172226238360157,0.138885172986916,0,0,0,0.000296203014712978,0,0.00304857848074541,0,0,0.01399518…
TCGA-A8-A06O-01,0.0321083433369831,0.0706329841949744,0.00737762002222328,0.02547883849112,0.0181228714469517,0.24896962837732,0.020692927659155,0,0.0486733655344031,0.0602691731025283,0,0.102656186534354,0,0.0378967538715544,0.0180547814749232,0,0,0.0176892835474714,0,0.127372072983575,0.0463560034923606,0.49767625422531,0.0106618335858545,0,0,0.0120013639885115,0,0,0.00674917941812559,0,0.01587…
TCGA-A8-A06P-01,0.11416865944166,0.0873236568592906,0.102372622784563,0.0800957450096686,0.112645797683307,0.471768597582999,0.00020066631835711,0.0154373429396314,0.0307836179866769,0.0720753092012666,0,0.0635338773257411,0,0.0356213784168377,0.0438275892278729,0,0,0,0.00927841279552044,0.030678703577983,0.01739598148353,0.505288129140318,0.000692212279522005,0,0.173168375869277,0,0,0.0020184034…
TCGA-A8-A06Q-01,0.0591491686006139,0,0.0184710565889617,0,0,0.0179373841429534,0.0767278404051764,0,0.0226979843661541,0.03839100413869,0,0.110635709932449,0,0.0411837264302298,0,0,0.00648145085628721,0.000916608969368371,0.0175305630688092,0,0.0600649673091092,0.532029478499861,0,0,0.093340666023866,0,0,0,0.00948847318640706,0,0.0028069239914279,0.00474758590161789,0,0.0136816566400105,0,0.00509…
TCGA-A8-A06R-01,0.0265868334061117,0.106803755650047,0.0206694061471624,0.123675679455237,0.0525783088415429,0.386090061166296,0,0.00783915187483627,0.132285602597165,0.0276434640280192,0,0.0401210043487189,0,0.0633804586527494,0.0417474132467266,0.000183828916892533,0.00780969667875394,0,0,0.246667004109775,0.122516621138078,0.275452607158273,0.00364710764394547,0,0.0267154461359039,0,0,0.003990…
TCGA-A8-A06T-01,0.0339537736202053,0.0815063353875926,0.0773468373530124,0.0607153535748152,0,0.201996004995614,0.0557667705803267,0,0.0486423913293976,0.136963416210178,0,0.114054236804893,0,0.0907118837934165,0,0.040685648561476,0,0.0432739674657834,0.000748398597324725,0,0.137310633832828,0.304230297139869,0.0195609478381981,0,0,0.00805140784630798,0,0,0.0191651140869812,0,0.0167167108582824,0…
TCGA-A8-A06U-01,0.0218067412555082,0.0768972764606673,0.0983519436850885,0.0679010596518736,0.0378013981031316,0.291607809263602,0.0140251451549057,0,0,0.144449040859897,0,0.0625673514868397,0,0.0634123440969066,0.00112551559950885,0,0,0.0548833202373396,0.0348292784730279,0,0.131481038554283,0.433365110786094,0.0104142274179503,0,0.049447627333247,0,0,0,0.00487281920372779,0,0,0.0501865793535812…
TCGA-A8-A06X-01,0.067998058713114,0.0396631946156737,0.122249824286704,0.106777737973931,0.0459049361515745,0.332296760260555,0.00553480562600231,0,0.0303887963119452,0.0353129123627293,0,0,0,0.122306844760639,0.00632237323559983,0.0584289068445929,0,0.0545694313530737,0,0.170421922617538,0.0945550903869145,0.391744413020284,0,0,0,0.0304145034806811,0,0,0.00161487296557967,0,0.00886644426863331,0…
TCGA-A8-A06Y-01,0.123562572044965,0.00549205665487284,0.058717053824416,0,0,0.125881219528366,0.0927908382232501,0,0.122005315343838,0.0263366009258865,0,0,0,0.107193026783309,0,0,0,0.0400788582766041,0,0.118715540095288,0.0503194772353215,0.365768506835535,0,0.0353030348059832,0.0414888014749843,0,0,0,0.00886126853216908,0,0.011651170334431,0.00251507258149089,0,0,0,0.0102366377251337,0,0,0,0.00…
TCGA-A8-A06Z-01,0.0482286325763892,0.0210358839199937,0.0622093077460847,0,0.00769662899809624,0.191363525585129,0.00390334227446047,0.00481909556809197,0,0,0,0.278726222145158,0,0.00921433025787409,0.0540104744105315,0,0.043942141380199,0.0201259065468186,0.0287460246471887,0.169802554287957,0.011343887569734,0.326152764803503,0.00829867732043289,0,0.0409145787880507,0,0,0,0.000377056904442633,0…
TCGA-A8-A075-01,0.126764774659853,0.15571688172053,0.0791298680922058,0.125429597157695,0.0524192413166902,0.618117364338319,0.00315201951013931,0.0117484731692305,0.0895290332446668,0.102062149442751,0,0.133608272873073,0,0.0602125715700793,0.0123135945431931,0,0.0327574462273664,0.0181511935340215,0.0146040320505289,0.0634793666573748,0.100632250507474,0.326597563224833,0.0143552919831451,0,0.0…
TCGA-A8-A076-01,0.145181107551557,0.0876819716174456,0.177495192494372,0.106642734361852,0.155511799624368,0.529224199365302,0.00416082364291335,0,0.0378597963671951,0.035139825036284,0,0.0406712298596197,0,0.0364014731627512,0.0327202398724248,0,0,0.00627433112585149,0.00642522053265374,0.171526630670246,0.0389659977824858,0.523761290153169,0,0,0.0635717560410999,0,0,0.00252138575330595,0.001584…
TCGA-A8-A079-01,0.130097927163673,0.030647731831709,0.116755574325862,0,0,0.379431268511851,0.0218016371245494,0,0.0927805336948795,0.0688469574976066,0,0.10152194586505,0,0.0261772827097779,0.0299135486188388,0,0,0.0115162981532897,0.0254688333014285,0.0693808350771831,0.0579215675241364,0.4670743815383,0,0,0.0227149035144997,0.00114484008702363,0,0.00373643529343695,0.00403312782353254,0,0.0171…
TCGA-A8-A07B-01,0.0599440747524923,0.0385155743725101,0.0514396847341787,0.00803386537209312,0.0803062306908586,0.152470861222105,0.0368244040188391,0,0.0149304604443244,0.0716553473520191,0,0.0918013765065535,0,0.059473681273343,0.0197965840366074,0,0,0.025014733368711,0.0184356601242449,0,0.0700857856885942,0.457882218282104,0.00103862489000234,0.0198649078518486,0.112002709848775,0,0,0.0011935…
TCGA-A8-A07C-01,0.0917832507817278,0.104866190581109,0.139793592659262,0.167524088454658,0.159116844856856,0.538357654293099,0,0.0340781483742752,0.0526676098548431,0.0853293406360579,0,0.199485370168083,0.0138315012377839,0.0813935574548559,0,0,0,0.0229176627924901,0.0156746796362163,0.0374678981125279,0.0675367127079954,0.372936787361453,0,0.00103832576538637,0.0156424058980313,0,0,0,0,0.017878…
TCGA-A8-A07E-01,0.115786395059494,0.146237465664571,0.32860641136083,0.148403633860633,0.11828825237687,0.706052190162617,0.0114083056034111,0,0,0.172250020088564,0,0.0755109866712878,0,0.0126475064002222,0.00486485956984906,0.00900672126360182,0,0.0399191213100312,0.0332041063763605,0,0.121469797432881,0.261861928649245,0.0314613127814397,0,0.226395333853107,0,0,0,0.00619616034142741,0,0,0.09355…
TCGA-A8-A07F-01,0.147916820120611,0.168444593122827,0.144826058838844,0.144270278729968,0.150089596746644,0.621867493552045,0.0335726961863039,0,0.013723157184189,0.0805526697089049,0,0.187097301118102,0,0.0182762465551125,0.0153500037921467,0,0,0.045731596844582,0,0.0423732790095416,0.041274217394725,0.365953685769739,0.0189967100873247,0,0.135475243258204,0,0,0.00162319309112465,0.0143392423977…
TCGA-A8-A07G-01,0.0764670296640875,0.0885966231590158,0.149447351396511,0.0832034840754125,0.0929720802197725,0.42823714229354,0.0965219329323621,0,0.0826839673315421,0.0893828646212932,0,0.0893553393007788,0,0.0302065022892713,0.0201544388623654,0,0,0,0.0219201975591598,0.0402404844899763,0.074287283546492,0.39480851465136,0.000570890370909601,0,0.0535434653758915,0,0,0.00632411866859748,0.03127…
TCGA-A8-A07I-01,0.0977190671208878,0.144759227842206,0.125356590296352,0.186329494290081,0.119409691910497,0.602489887761802,0.00940648931403297,0.00427089363830376,0,0.05355636206835,0,0.0851587513430913,0,0.037352776493445,0.0659373457706974,0,0,0.0305933788379164,0,0.224948825323926,0.0998349152725582,0.327982032060594,0.00535548579428932,0,0.0556027440827951,0,0,0,0.00422212546398567,0.001917…
TCGA-A8-A07J-01,0.0408385368927382,0.206735147687621,0.257959968202351,0.234228325343469,0.434421460752985,1.03343148939664,0.0277613599770524,0,0.00615477882635533,0.0242693836104223,0,0.0686986187897227,0,0.00754719854173362,0.00795358585455169,0,0,0.00984937759201953,0.0541597926777855,0.225315556149167,0.0213969713286293,0.413947998414323,0.0199539547148902,0,0.112899401982833,0,0,9.202154051…
TCGA-A8-A07L-01,0.0185143226218126,0.0859726394547368,0,0.0170350061457789,0,0.214479872176833,0.00108218709261855,0.00916343390043229,0,0.0872017977503222,0,0.145226008759034,0,0.103658587631237,0.0305645507660269,0,0,0.0429827142716611,0.0272024836728505,0.0996724295086145,0.00777026441019067,0.366555663975488,0,0.00887261564659484,0.0700472626149296,0,0,0,0.000208080146119224,0.001761921462528…
TCGA-A8-A07O-01,0,0.0396903890181744,0,0.181441309011826,0,0.364101426306338,0,0.0131196389412967,0,0.0503847760261297,0,0.00813571032266238,0,0.0318259677926796,0.0352080437424929,0,0,0.027500913421526,0,0.658384148567257,0.0191681923806469,0.0962601756142677,0,0,0,0.0600124331910406,0,0,0,0.00431694559163239,0,0.0165788355704466,0,0.00267701108005829,0,0.0104721610081491,0.0115850146413505,0,0,…
TCGA-A8-A07P-01,0.0974686578139754,0.0203929289330129,0.0802502662414203,0.0418401007336451,0.0812606262028778,0.277229860604546,0.0196392736415031,0,0.00478103523409344,0.047954382500153,0,0.0838283007798371,0.00257245759197178,0,0.00247198255573813,0,0.00331351737505217,0.00247189015723361,0.0420470365779836,0,0.0371054575779137,0.433017796232438,0.00312226441860271,0,0.317674605357479,0,0,0,0.…
TCGA-A8-A07R-01,0.0601495316104505,0.0495074224613769,0,0.0554607587857007,0,0.30974824282172,0.127802329232593,0,0.283509127237565,0.0154409662561243,0,0.0378247263678084,0,0.0434389732243845,0.0119845749411737,0,0.00509536848970437,0.0207587143636465,0.00991004234882562,0.075024663546718,0.119823271144347,0.186404528399289,0.0138545585415097,0,0,0.0194605035290157,0,0.0296676523772947,0.0206706…
TCGA-A8-A07S-01,0.0711310437671667,0.0669496763367798,0.0782479143419897,0.052750829300728,0.0432854559328735,0.267990731054235,0.0101891565772281,0,0,0,0,0.101870227906966,0,0.0464184042385884,0.0156476494156287,0,0.0457059316713243,0.0042492363732177,0.00249230472022262,0.114109079693005,0.0240347216233928,0.524701837499297,0.0064694634973567,0,0.104111986783773,0,0,0,0.00183605687163622,0,0,0,…
TCGA-A8-A07U-01,0.192738906163464,0.29061641987675,0.188870932037945,0.332265902312333,0,0.937443748043434,0.0473776723806835,0,0.0361497622049208,0.096913513323818,0,0.1347058529156,0.0188860355289312,0.104199645429226,0.0413579726281624,0,0,0.0695065432534708,0.0284891747276081,0.0388188490354233,0.221474713401582,0.130067874422275,0.000768863952115692,0.00677969544678427,0.024503831349398,0,0,…
TCGA-A8-A07W-01,0.0802767312938951,0.0812398544130343,0.0463469018333267,0.086825496284189,0.117271624847176,0.437888693255641,0.0171813828098625,0,0.042232082822183,0.0493874838466647,0,0.110835069650733,0,0.0393051222353544,0.00447367672870772,0.00694705928598756,0,0.00318956072817022,0,0.147296877234467,0.0438341118388477,0.510156985743372,0,0,0.021493117214811,0,0,0.00366746986083909,0.006478…
TCGA-A8-A07Z-01,0.0278190830742382,0.129418640587337,0.00344295809488993,0.0335000101491446,0,0.37604071109885,0.0279886840668569,0,0,0.0977298658027194,0,0.0306677642978245,0,0.0643428075101888,0.0673367573358971,0,0.0221113134276858,0,0.0639790024348961,0,0.00623319865721061,0.472951220969234,0.00162009320129623,0.0591750370282501,0.0858642552679403,0,0,0,0.00819114386580015,0,0,0.0286015372806…
TCGA-A8-A081-01,0.0978307817381336,0.0976489441265145,0.304575330902332,0.185658474193655,0,0.660345199369256,0.0115765037814406,0,0.0202021403986813,0.183015017039851,0,0.11817535500391,0.0435385423461369,0.0478859900744845,0.00552241574610392,0,0,0.0540792732175231,0.0215245369570372,0.121799098263195,0.145569595924058,0.163350033159343,0.00510254606712227,0,0.0586589520211138,0,0,0,0.007244343…
TCGA-A8-A082-01,0.082981247733488,0.0506021588293304,0.26507542027735,0.08598872272316,0.115234755059711,0.450110879890742,0.00142364256032063,0.00276115356041955,0,0,0,0.0890249812405419,0,0.011924805272974,0.00479326910321009,0,0.0779257271299383,0,0.0154783644259285,0.0213289176149985,0.00730046276244557,0.684748804462575,0.0142111243213204,0,0.0607328965049921,0,0,0.00834585104033493,0.000235…
TCGA-A8-A083-01,0.0446918773491424,0.0294118709595582,0.0963328536276661,0.0226425447238694,0,0.165217255337751,0,0,0.10627392430135,0.0694674789913864,0,0.0691980001344142,0,0.0908506766435784,0,0,0,0.0853506551934478,0.02779385142658,0,0.0380581011975827,0.421274675534,0.0281902377715444,0,0.0548853613414477,0,0,0.0086570374646686,0,0,0.0156358979649143,0.0102206295714569,0,0.0101809816151118,0…
TCGA-A8-A084-01,0.044205701605698,0.0763798071537029,0.0604075650374818,0.0664517789861156,0,0.263027670693298,0.0964769087199661,0,0.00533673933162221,0,0,0.0374008123612151,0,0.0737696801655126,0.0110955369616924,0.00282170524670328,0,0.0114664530203598,0,0.3664863287197,0.0634899916124879,0.262777345623156,0,0,0.024024679480882,0,0,0.0448538187567024,0.0172131704782881,0,0.000952167779131872,0…
TCGA-A8-A085-01,0.0422013028798502,0.0801959331516951,0.0515177682034778,0,0,0.103302337980713,0.0217377639382423,0,0.000540050254352306,0,0,0.0823610917007321,0,0.0115751014221892,0.0302492042154969,0,0.0423795084562625,0,0,0.340449163211027,0.00775320278472172,0.359402284766958,0,0,0.103552629250018,0,0,0,0.0016460360670072,0,4.08939115902546e-05,0,0,0.00623658108730269,0,0.00087649467876825,0.…
TCGA-A8-A086-01,0.0156789430399652,0.0471223778437912,0.0497880374661219,0.0740185502774617,0.0949298094872646,0.22844245540565,0.0032155304920272,0.00481666332630392,0.0168660806716281,0.0405276249687295,0,0,0,0.0244221761315686,0.0367888102776787,0,0.0361267075551601,0,0,0.270010006252489,0.0218269485183067,0.440151202953244,0,0,0.105248248852864,0,0,0,0.000678177291504908,0.00101586711642857,0…
TCGA-A8-A08A-01,0.161572041271776,0.135368126012565,0.0278767606923441,0.0679778963285855,0.0411192697217059,0.483962548272736,0.00714996550403514,0,0.00781399829903101,0.0213142042294692,0,0.0339075672046501,0,0.0922771962684668,0.0670222178471228,0,0.00474441457556247,0.00577061151679584,0.00587897038981885,0.252187682692529,0.0356220379793676,0.394411934076398,0.0168982932112032,0,0.0550009062…
TCGA-A8-A08B-01,0.0382072990985256,0.0614449642830604,0.0256165535707382,0.0429909385276717,0,0.117692610728108,0.0158564129137703,0,0.0820112555448513,0.128184035515537,0,0.201513354644506,0,0.0333861596471068,0.00970169108594337,0,0.00195177778932476,0.0360768539264832,0,0.0785376060464852,0.10711919193644,0.237112425960659,0,0,0.0574882911481065,0.00719758821636826,0,0.00386335562441858,0.0043…
TCGA-A8-A08C-01,0.0834504764003833,0.0619055612567524,0.0632582705706844,0.0299143216346846,0,0.221201742862723,0.0597233732098483,0,0.0259351736395007,0.0732154729529302,0,0.143193325108944,0,0.0643616073453112,0.0156448408715079,0,0,0.0512198304881575,0.0501323357063264,0,0.0383928375453185,0.382877080293169,0.0248896347660223,0.0216661821005535,0.0467017098619237,0,0,0.00204659611048641,0.0111…
TCGA-A8-A08F-01,0.0288874287405936,0.141287170043781,0.0913967834872501,0.210565270686222,0.100753325879045,0.709523751840161,0.00589241977996555,0,0,0.0965915607869859,0,0.0764707094656775,0,0.0589575206470926,0.026126000998445,0,0,0.0460476181666627,0.069526572890338,0.110612767347957,0.0788417779635273,0.40653570538168,0,0,0.0145013819026054,0,0,0.00989596466906344,0.00368088574998397,0,0,0.06…
TCGA-A8-A08G-01,0.00899215349547266,0.123183171632216,0.0020143133454977,0.0848666864663,0.0614266215414676,0.371728212342655,0.0362233556728507,0,0.0431486384926267,0.0719496778870891,0,0.117534536369555,0,0.0850191034814917,0.0339989831928615,0,0.0166566687927828,0.00156416197018347,0,0.0990879433734562,0.0879204081099885,0.334528185696417,0,0,0.0517448393459923,0,0,0.0206234976147051,0.0138611…
TCGA-A8-A08H-01,0,0.308622650858976,0.283866144611958,0.408329909459381,1.19448379546154,1.55367736960737,0.0128959421708499,0,0,0.0449337187490665,0,0.0569002612799094,0.000816449590005717,0.00156666514471901,0,0,0.00787647007097065,0.00643276338910834,0.0677103797809515,0.0633766316557277,0.0163158036558038,0.599878359227021,0.00312962133300457,0,0.0980909165312611,0,0,0.0200760174216005,0.0089…
TCGA-A8-A08I-01,0.227181250972956,0.138876617029625,0.505161526728024,0.470128396532269,0,1.74928001470117,0,0,0.0170513541846206,0.179092325506917,0,0.0126573217248581,0.00927089229281116,0.0299108582950745,0.0269715353679269,0,0,0.0393941631239612,0.00509700746668936,0.404262991409,0.113504905626012,0.15750527167389,0.00528137332823851,0,0,0,0,0,0,0,0.0183413176402385,0.192640959391604,0,0.0136…
TCGA-A8-A08J-01,0,0.0634813379471482,0.0138509482483338,0.0652604656880039,0.126711377429422,0.291541460399787,0,0,0.0975721143774121,0.0441448258409769,0,0,0,0.0386924430722577,0.0439258746066758,0.0151368176989442,0,0,0,0.239756797598419,0.0376562729805009,0.463113529838828,0,0,0.0200013239859854,0,0,0,0,0,0.0301197852991874,0.0136271790857907,0,0,0,0.0119440691172234,0.0135595904698196,0.00467…
TCGA-A8-A08L-01,0.056280953109883,0.176643915763961,0.254936255881992,0.132526047962482,0,0.523975781401251,0.0570844668785153,0,0,0.135147906628562,0,0.165511489793335,0.0333040969903331,0.0717704120124237,0.00757257531344445,0,0,0.0300764692885996,0.0593202107286434,0.0296215465793191,0.119287341638267,0.230503125272083,0.0130191811119389,0,0.0477811777645356,0,0,0,0.034261917902971,0,0,0.08111…
TCGA-A8-A08O-01,0.0625259884975834,0.107869593170652,0.0770509450236655,0.0654254961657055,0.0221524957980805,0.274478069568953,0.072698440850901,0,0.09492375560025,0.0823163968388602,0,0.0734554201624475,0,0.0324470264699141,0.0273298990455318,0,0,0.0566316810691877,0.0179819713089197,0.00619028977463816,0.0602258884351472,0.335526387492818,0.00334974696869362,0,0.136923095982692,0,0,0,0.0183832…
TCGA-A8-A08P-01,0,0.223371384068444,0.118796375490744,0.202994607927206,0.105885512808003,0.85067291302833,0.0102583961091814,0,0,0.128706983250977,0,0.127545580692971,0.00839139821271974,0.0817760479856349,0.0467346328053843,0,0,0.0492685198217552,0.0258291204520691,0.0673697903125005,0.116818319152424,0.283591098159328,0.00655780239132853,0,0.0471523106537263,0,0,0,0.00705879632289668,0,0,0.088…
TCGA-A8-A08R-01,0.0436980921909585,0.217554759015763,0.179379022193304,0.268408764534133,0.0837428336897705,0.888587150410363,0.012322110708627,0.00206214727653865,0.0166218732240581,0.0453001626130191,0,0.0635808708949554,0.00887953094699228,0.0695444847169927,0.0112756503069303,0.00656311567015153,0.00522651017117498,0.0113630953648465,0,0.328409881548511,0.161348409811678,0.257502156745525,0,0…
TCGA-A8-A08S-01,0.0336023579555548,0.0575299902559841,0.0533319346746087,0.0510465784986486,0,0.196576149284381,0,0.0140795058830532,0,0.0720926114174678,0,0,0,0.054592588592627,0.0945075312344589,0.00755584948137969,0,0.0665132167690604,0.0138266924045477,0.354183538980304,0.032857712595507,0.212921638800138,0,0.000400747243887153,0.0764683665975689,0,0,0,0,0.00424585029695932,0,0.02174042456730…
TCGA-A8-A08T-01,0.0911639263969894,0.086972202378872,0.0124129971478509,0.0559635575699335,0.00674743082063676,0.256287480367757,0.015239614493967,0,0.0155354531729766,0.0440731460834663,0,0.0935606530172715,0,0.0273806804102301,0.0187489245577915,0,0.00112320551072133,0.00768421976895556,0.00286540339489228,0.296659002470212,0.0225642698165371,0.344009625912552,0,0,0.110555801390427,0,0,0,0.0041…
TCGA-A8-A08X-01,0.230814807362547,0.171834876663002,0.119964488315742,0.0736391457524791,0.02038275228168,0.646405190324594,0,0,0.329535066531615,0.0514118307629102,0,0.14097324160377,0,0.0378892667755549,0.00137197073461009,0.00719587161263727,0,0.0151308688795615,0.00362033929590057,0.0268265920892478,0.0664976587317422,0.300182697899039,0.00289770279380489,0,0.0164668922896062,0,0,0,0,0,0.1676…
TCGA-A8-A08Z-01,0.0247419173013097,0.198671285347987,0.110523886200125,0.268834382912923,0.42195859917234,0.7256464623947,0.00184713474277166,0.00240353937550567,0.0129460516321197,0.0446664264806554,0,0.0960184692802979,0,0.0313976229007834,0.0127089736589937,0,0.0130621182308769,0.0156051088567441,0.027577980263324,0.177217880992545,0.0220781185245038,0.446833744473499,0.000351678136907248,0,0.…
TCGA-A8-A090-01,0.0187997340038112,0.0941650723142032,0.0830488527670325,0.154094954782266,0.171366651731107,0.546286689375335,0.00300910050841834,0.00288099241668343,0,0.00548485318588147,0,0,0,0.0510736247415043,0.0464348600783639,0.0318679985304119,0.0156427506354534,0,0,0.343930531453093,0.0499367568798239,0.412476511396223,0.00371092888004111,0,0.0335510912941025,0,0,0,0.00129327585932268,0.…
TCGA-A8-A091-01,0.0237118957474582,0.094721780359944,0.0638573071666011,0.0552387986390922,0.115702580104918,0.200242621712128,0.0563473970754299,0,0.0653718855449522,0.0918071804032572,0,0.152782878110663,0,0.0301958661987505,0,0.0185142306127132,0,0.00252843018194682,0.00764929709575753,0,0.037495070668037,0.412136514030463,0,0,0.125171250078031,0,0,0,0.0193898649429721,0,0.022495307637498,0.03…
TCGA-A8-A092-01,0.030732231396333,0.072580166211797,0,0.0167824265230621,0.0551564968151499,0.259456166095559,0.0208179259871747,0,0.00760589647667718,0.041648381103663,0,0.0943241371447498,0,0.0437022298869523,0.0198119242696764,0,0,0.00860677141520226,0.0192602531185848,0.148002146093236,0.0596609759974409,0.44443449232269,0,0,0.0875647613102942,0,0,0.00456010487365778,0.00470291948439629,0,0.0…
TCGA-A8-A093-01,0.036606954519903,0.0715530439142755,0.0035059100368567,0.0202736918767265,0,0.119527275293247,0,0.00932186924894241,0.0328902578686028,0,0.039390508927038,0.188796744737197,0,0.0385157426513886,0.0872355211961198,0,0.0659835354972286,0,0.0204812569658652,0.138672886013031,0.0165356773302411,0.233838879176978,0.000701197632275788,0,0.127635922755091,0,0,0,0,0.00116579266948288,0.0…
TCGA-A8-A094-01,0.0392282958907376,0.0463154980006409,0.231866181226366,0.231190535739496,0.104182354963608,0.668674989443763,0.0296995517112058,0,0.0450515959341404,0.0947123914298721,0,0.0802658652345035,0.045821186637446,0.0467906845471244,0,0.0126197255475225,0,0.0520863016566614,0,0.135463107569594,0.112057300983468,0.330461294228604,0.00686552771125401,0,0,0.00627077471785027,0,0.0018346920…
TCGA-A8-A095-01,0.0611951155943307,0.133982378726163,0.10947142534305,0.0698817420502279,0.0483736809027255,0.379781876524816,0.0213532506737407,0.000488733781542275,0,0.0859542170090618,0,0.14021108870957,0,0.0928836243022608,0.00786403768642809,0.00085614806511537,0,0.0256119870708767,7.3528903196998e-05,0.0178408864695686,0.0600451125267871,0.403980826035292,0.00698390121746921,0.0015725599341…
TCGA-A8-A096-01,0.143878210806006,0.218065614758587,0.19238794511688,0.296436880282742,0.214204155467565,0.972682662760644,0.000427260697661447,0,0,0.106003209469672,0,0.214044491310001,0,0.0670724668240989,0.00750578987834163,0,0,0.0395002196775484,0.10036720707348,0,0.0748435685583404,0.356347936386731,0.00249978102816031,0,0.0307976209506449,0,0,0.000590448145319611,0.000292136820544799,0,0,0.…
TCGA-A8-A097-01,0.0466438793996675,0.103480626950484,0.0831416497089726,0.122492273642482,0.109450080878512,0.444394114016848,0.0438181124023106,0,0.00833735045120488,0.0339490151868379,0,0.0566758729609987,0,0.030499111119045,0.019384928909959,0.00704619266675604,0,0,0,0.273378796156741,0.0713431184567928,0.413428043905934,0,0,0.0354696619503726,0.00666979583304743,0,0,0.0176626677848145,0,0.003…
TCGA-A8-A099-01,0.14959714402543,0.0878802197759532,0.098229225698782,0.0698648315456644,0,0.353312309094893,0.000483451322709243,0.0015168148207212,0.0291507466491732,0.0173042130995361,0,0.199134824520707,0,0.029022650842357,0.0359456475527494,0,0,0.00926579293270267,0.0508557316783264,0,0.0717929324502131,0.460385812895006,0.0141437115231575,0,0.0809976697126418,0,0,0,0.000107362438280041,0.00…
TCGA-A8-A09A-01,0.0406153742569154,0.118959672850947,0.171443114594386,0.108077615632935,0.0945410739622105,0.358678782468955,0,0,0.0203414855958095,0.120386645824346,0,0.194554559081141,0,0.0553499227437607,0.00733268760496161,0.00715302975166938,0,0.021772135143506,0.0135639287845791,0,0.147839658487945,0.27877379034277,0.0162769289160526,0,0.11665522772346,0,0,0,0,0,0.00858521369594588,0.05080…
TCGA-A8-A09B-01,0.0444472073717621,0.0699468907994995,0.0290872849081893,0.0305012581044541,0,0.19219198095599,0.0621824855350424,0,0.0260305719269362,0.109031664837036,0,0.0876022384868836,0,0.0473539939594297,0,0,0,0.0201845381144305,0.0996346623464849,0,0.0496033793535495,0.379483337780184,0,0,0.0620008233156192,0.0484430371983586,0,0.00844926714604516,0.0146249002110741,0,0.0061222145366655,0…
TCGA-A8-A09C-01,0.0474622272394128,0.0263402169040443,0,0,0,0.135040586132218,0.0426785146300014,0,0.0169966278075358,0.0439708993567735,0,0.0781065528087395,0,0.0773629119644747,0.0119659826824887,0,0,0.0476154554498685,0.0312993757303217,0.0194535562746536,0.0545503542864176,0.429830397815588,0.0308267848207936,0,0.101236765407008,0.0132126654307196,0,0.000893155534616177,0.00730528041437947,0,…
TCGA-A8-A09D-01,0.029561185962662,0.135597808711879,0.139338857774649,0.130427954355191,0.280435524669601,0.566007432501289,0.0134720773628679,0,0.00351330855824938,0.0304548248870187,0,0.114860712719616,0,0.0127285293350975,0.0241520985691672,0,0,0.0147470889542531,0,0.166658949960326,0.0538937794192734,0.505167714997907,0.00597113322291334,0,0.0512094069793129,0,0,0.00317037503399681,0.00575062…
TCGA-A8-A09E-01,0.0419083571816586,0.0151670782692599,0,0,0,0.0612993580752914,0.0259722700864429,0,0.00643248012588437,0.116313969652349,0,0.069977115943204,0,0.118444393232389,0.0293678872939849,0,0,0.0161139712713552,0.033835815102652,0.0908757583118215,0.0906430178670785,0.26063624671142,0.00525834057084614,0,0.131839990803413,0,0.00428874302715923,0,0.00380365967149079,0,0.000942041845439757…
TCGA-A8-A09G-01,0.249838783111717,0.120571946490555,0.289975427656063,0.136964537769491,0.0807623199944571,0.494613349093638,0.0431935477085513,0,0,0.125233503604951,0,0.245343984347484,0.000342031085725167,0.0812575438492688,0.0156727738474348,0,0,0.0336596447852048,0.0338993668981987,0,0.14373450334403,0.22097374350811,0.00687124795197484,0,0.0498181090690671,0,0,0,0.0226914391696194,0,0,0.0657…
TCGA-A8-A09I-01,0.0540709914443457,0.0307763676416564,0.127495920697426,0.142382099462917,0.0080692689244856,0.575564455901577,0.0609119596971786,0,0,0.088398524768646,0,0,0,0.0940418531107329,0,0,0,0.0857269885484194,0.00913365135336678,0,0.111935167617699,0.497601933143171,0.00948822258627327,0,0,0.0353341772004891,0,0.00742752197402321,0.0286053739423799,0,0,0.0415135692486836,0,0,0,0.04416377…
TCGA-A8-A09K-01,0.0718548554367632,0.101947113511358,0.213405554906506,0.0622651376685133,0,0.318438988227511,0,0,0.0527980777500988,0.253985893008328,0,0.0985754719681524,0.0125871117433936,0.0774896261120541,0.0116770916430658,0,0,0.0568269886310413,0.00672567716126151,0.0129688679847105,0.0637905145888825,0.189391058348055,0.00423587792902469,0,0.157958066438862,0,0,0.000989676693070127,0,0,0.…
TCGA-A8-A09M-01,0.0993854297284992,0.0867752094652127,0.0787598429873449,0.0777524662958296,0,0.441592553072583,0.0313851032962972,0,0.0949423297626756,0.12955376832934,0,0.141754660742002,0,0.0669470134111852,0.0332231490745102,0.0276140873150314,0,0.0434127575989182,0.0519531626592396,0.00737741449921855,0.0656601832403151,0.304708737620138,0,0,0.00146763245112866,0,0,0,0.0137199515722605,0,0.0…
TCGA-A8-A09N-01,0.14911240160729,0.0751638408576299,0.136224550391786,0.0376816077942188,0,0.323663146928274,0.026136589569944,0,0.0219271203613712,0.138368921535359,0,0.13880571341999,0,0.0213628635044139,0.0501267284508428,0,0,0.068527753839754,0.0103811529067942,0,0.0921202143423197,0.289108227164045,0.00428182758268494,0,0.138852887322481,0,0,0,0.00805448285540293,0,0.0067572555534222,0.04264…
TCGA-A8-A09Q-01,0.175598073828394,0.126228988499776,0.106359600312954,0.107151693730548,0.191732612628345,0.609849864137524,0.0475230610674627,0,0.0520064294834663,0.05000972272044,0,0.202256239479148,0,0.0422393141030654,0.0046224914219623,0,0,0.0154438712283895,0.0009756127099162,0.0862959806277435,0.041557432549709,0.394798975309438,0.00561479779554319,0,0.051027163574129,0,0,0.005628907929585…
TCGA-A8-A09R-01,0.0351112259554412,0.183616475504453,0.0800943036791942,0.21363479158243,0.0725718495797288,0.697740926309488,0,0.00189194130308926,0.0123526612540859,0,0,0,0,0.0721144067463216,0.0124137783781585,0.0796534854948175,0,0.0219810449092536,0,0.342237569073099,0.134275770508788,0.306606766165677,0.00617925975297581,0,0.0102933164137335,0,0,0,0,0.00100673000478054,0.0065730341121432,0,…
TCGA-A8-A09T-01,0.197990222209404,0.0334788698888471,0.0561939666845411,0.0855431566524764,0.0206467927255081,0.488611170764497,0.00974952921023355,0,0,0.0266867926268799,0,0.127397475372268,0,0.0154803479668375,0,0,0,0.0474279725669789,0.00677606179620777,0,0.0426127224599009,0.628218149836492,0.00144845235661137,0,0,0.0867572843161784,0.00135897083370284,0.00608624065770849,0.00165100014033485,…
TCGA-A8-A09V-01,0.0838632697167249,0.141178697342644,0.0626891273871521,0.0950160639912159,0.0757282389190789,0.269841004465381,0.0148456924532788,0,0.0587390522000906,0,0.0334167109336392,0.171158766833209,0,0.0496578562091616,0.0223997285588285,0,0.0596241397830137,0,0.0330386082710632,0,0.00209742205919845,0.264488762857719,0,0.000373166634749341,0.284819682509585,0,0,0.00534041069646395,0.003…
TCGA-A8-A09W-01,0.179081917434848,0.036537909373535,0.148095199798266,0.0449801644697469,0.0509813697303119,0.521479161613386,0.0438974324174177,0,0.0484962712591033,0.0515753992550013,0,0.159778401816843,0,0.0262367308665993,0.00105767200672422,0.000819982967974188,0,0.00800755941896962,0.0523404341526217,0,0.0439550335569529,0.4756025778191,0,0,0.088232504462693,0,0,0,0.0105109257297507,0,0.011…
TCGA-A8-A09X-01,0.149764607370443,0.0892260444848809,0.247748721147025,0.152389454429342,0.0945905367536241,0.678372273143154,0.0152244722758055,0.0042482955890526,0.0150573102386524,0.167443926073853,0,0.155674511770801,0,0.0530099265355523,0.0388823121493879,0,0,0.0571048850120878,0.0269748035429112,0,0.0976715221644088,0.286043533988852,0.0107302993590822,0,0.0719342012995542,0,0,0,0.007785176…
TCGA-A8-A09Z-01,0.0789475622171366,0.0641922379267403,0.262958860189838,0.157988581804552,0,0.496890759106232,0.00695050100518915,0,0,0.11310561253525,0,0.216503405638031,0,0.0724923109310967,0.0355465498000102,0,0,0.0787100559611216,0.0208483690598255,0,0.105157536494088,0.274726335089725,0.00602595682799688,0,0.0699333666576661,0,0,0,0.00218785723817107,0,0,0.0356030353607989,0,0.06815027330550…
TCGA-A8-A0A1-01,0.0650637695704405,0.211374827277818,0.230657523378863,0.322123876970127,0.208545017626054,0.98683033227829,0,0.0174343046420457,0,0.0812022802963542,0,0.00536864014315712,0,0.0811496702626571,0.050550483416387,0,0,0.00642588622299622,0.0226648100213506,0.350100512540029,0.085456489020969,0.223243708517519,0,0,0.0764032149165348,0,0,0,0,0.0120126208491634,0,0.0559501640768126,0,0.…
TCGA-A8-A0A2-01,0.151605471944865,0.0680192596974233,0.146153019591342,0.0957584449966525,0.0966362078943732,0.358499415566781,0.018696924148318,0,0.131185185775444,0.105010135278706,0,0.153793355827963,0,0.0522351646695172,0,0.00896396118761665,0,0.0349283068379398,0.0386658773623652,0,0.050332231048719,0.333315432679981,0,0,0.0728734251834308,0,0,0,0.00707040015093944,0,0.049608788587355,0.0397…
TCGA-A8-A0A4-01,0.0821732928317741,0.0956847474517808,0.118240049972318,0.0311450320747685,0.049853464671024,0.251761889530963,0.0590415336912711,0,0.0633572536840043,0.0870906239160868,0,0.160576875433889,0,0.0673425869452656,0,0,0.000157333819014453,0.0304293650917859,0.0132865943262672,0,0.0635259542724707,0.360758207536178,0,0,0.0944336712837667,0,0,0,0.0174068907340511,0,0.0186792707292099,0…
TCGA-A8-A0A6-01,0.173255834608853,0.118351026772109,0.373976176024937,0.190157161784309,0.0432876211870493,0.774085436815419,0.00881540449727392,0.0343188260288204,0,0.151409925080326,0,0.188087813171829,0,0.0620367553812836,0.0168142250505356,0.0279575572586818,0,0.0433721707132619,0.00321474919701635,0,0.130983063698151,0.247906569546318,0.0139564045256905,0,0.0711265358508119,0,0,0,0.005787712…
TCGA-A8-A0A7-01,0.278123645902871,0.3034188885344,0.767838475709238,0.328941703282713,0.193539023994943,1.19125924925595,0.0188528069827222,0.0225317984239536,0.0525195754242778,0.232074424562975,0,0.133237224203958,0.00212421931158691,0.0424832432648059,0.0248132228094303,0.0967093697349334,0,0.0253895423639485,0,0.0698213658869645,0.0878237969737909,0.162449247154621,0.00084211218868548,0,0.028…
TCGA-A8-A0A9-01,0.0338984980139671,0.119011614988724,0.0587003934358451,0.0867217210105294,0,0.359770081051546,0.0244548145131716,0,0.00425607874529017,0.102953638005696,0,0.145455024017057,0,0.0585400254187373,0.0132964692151851,0,0,0.0289434256319518,0.0036236121418558,0.172440464358414,0.0664053355933177,0.350316931049201,0,0,0.0175648234753012,0.0107942106163907,0,0.000955147218430624,0.00809…
TCGA-A8-A0AB-01,0.0389763170776557,0.0880041120195638,0.0650364836056908,0.0164455604584399,0.0107075534429574,0.130179423630275,0.00109836414261875,0,0.0487751717335324,0,0,0.143347322279585,0,0.0127336957385699,0.0211561938513221,0,0.10134173224424,0,0,0.247107636518309,0,0.123984742524455,0.00652401696152743,0,0.293140112583279,0,0,0.000791011422561556,0.000143197478280215,0,0.0063589854438198…
TCGA-A8-A0AD-01,0.0603694689474782,0.0737253653778367,0.126285191325911,0.19786345536551,0.232509558057243,0.467483724810582,0.00386982663276282,0.00335872343699744,0.012226391392032,0,0,0.125536666186151,0,0.0313257617249968,0.0167353937128715,0,0.0231158204172987,0.000764352126428223,0.142338203498762,0.00827323012838608,0.00697412690329749,0.447287126704792,0.00284355404113554,0,0.167374565826…
TCGA-AC-A23C-01,0.164726207472781,0.117952807178688,0.20222934221036,0.14706823402568,0.0823004852570889,0.625542032500187,0.0629169928166543,0,0.0912607701021391,0.119277560828491,0,0.184605388686187,0,0.0387406313701093,0.00327042691621976,0.0142917455570776,0,0.00202760698025098,0,0.000685665590311148,0.115234219016939,0.32701539952014,0,0.000489404095059908,0.0353431003059674,0,0,0.0048410882…
TCGA-AC-A23E-01,0.0190826701934237,0.0585521158076118,0.130834966466523,0.150647340589467,0.211265567102754,0.397489668376674,0.0197713752970422,0,0,0.0174827209210649,0,0.030308508043594,0,0.018099578967338,0.00608391179231454,0,0,0,0,0.179117064025059,0.019914831899328,0.613449524343129,0,0,0.0873880446341528,0,0,0.00838444007697748,0.00484582873448448,0,0,0.00428489521459557,0,0.00742840783559…
TCGA-AC-A23G-01,0.019173937206482,0.157712415984919,0.156290314723102,0.165790531987037,0.132529094326979,0.686622934737339,0.0123826229124773,0,0.0220215064451967,0.0491157785092411,0,0,0,0.0501651467057732,0.0466613094431194,0.0179972575974012,0,0,0,0.413464493217443,0.0405305899173264,0.296680707005509,0,0,0.0371775130874105,0.013803075159103,0,0,0.00610173883234613,0,0.0108514554608636,0.0242…
TCGA-AC-A23H-11,0,0.0846251938638679,0.359239228827052,0.0927586615205034,0.196889416649643,0.477360249055003,0.0645607274399613,0,0.0974268184413658,0.0726965010174328,0,0.0346239768870211,0,0.000658345687333213,0,0,0.00656589865933248,0.0151560467941547,0.0129318673801804,0,0.00582476932099679,0.432373860489246,0,0,0.257181187882975,0,0,0,0.0239041089998302,0,0.0360730335589055,0.02691644213338…
TCGA-AC-A23H-01,0.134681379677783,0.0209152026452665,0.149978856236235,0.0714101755471716,0.0218123769549545,0.390290110756194,0.0356459428142469,0,0.0136236790154168,0.0218475236892837,0,0.0481737094327903,0,0.0414478583590461,0.00230357487233149,0,0,0.0145277593120217,0,0.419049347175833,0.0594098296631258,0.287177843476114,0.00890166358647496,0,0.0411626991539714,0,0,0.00672856944934337,0.0066…
TCGA-AC-A2B8-01,0.0850147837340426,0.201655436480709,0.255530182572133,0.222155077727927,0.168527627051217,0.711116840531015,0.0601655112393649,0,0.00142491012051969,0.101247339284577,0,0.196871505939047,0,0.015465184857262,0,0.0152828142411255,0,0.00938909111930103,0.0337361502631691,0.036798048925485,0.0703472888079169,0.361103624343074,0,0,0.0981685308591582,0,0,0,0.0369292876771781,0,0.000874…
TCGA-AC-A2BK-01,0.092332523171048,0.0140154110738633,0.167812854368031,0.0615836677441006,0.0350227976048441,0.350082087209099,0.05373277052921,0,0.0878008641977936,0.166716678319495,0,0,0.0245413216821784,0.0897516790045972,0,0,0,0.0632061914207828,0,0,0.108187318475086,0.335914111134527,0.0270571478431474,0.0175159357578674,0,0.0255759816353152,0,0,0.0080920486280313,0,0.0132226359384444,0.0251…
TCGA-AC-A2BM-01,0.091180124657946,0.12536676786999,0.118776969357167,0.124393849016873,0,0.451520245748049,0,0.0392938651041472,0.0231607213327933,0.155747309491824,0,0.131259918975264,0,0.0734446122194341,0.0148449696666084,0,0,0,0.0092571300139579,0.00981046762357555,0.106768644500052,0.319095125368421,0,0,0.117317235703923,0,0,0,0,0.0188399962043869,0.0111047335466786,0.0746752377729249,0,0.06…
TCGA-AC-A2FB-11,0.0536199516146982,0.179606849560059,0.407042902808307,0.145913260120659,0.291758347676242,0.826803373575992,0,0,0.103203027061717,0.0885010322511868,0,0.142152441716898,0,0.00391785458775044,0.00304633448495671,0,0.0101462868511489,0.00446225281613043,0.0732085921881799,0,0.03043049683205,0.438777488969948,0.00353990187537426,0,0.0986142903646591,0,0,0,0,0,0.0579997468678401,0.04…
TCGA-AC-A2FB-01,0.297077682150954,0.308286479019932,0.795255208722005,0.320151374698187,0.12473735349198,1.13306467527696,0.0736691066423399,0,0.0192630866712247,0.168753314559986,0,0.239257491788752,0,0.0300021459418422,0,0.0559280410901865,0,0.0471510047022014,0.00394226308527629,0,0.0997588345519316,0.122230228347704,0.0217367734813608,0.0138279889986227,0.104266638981716,0,0,0.000213081156855…
TCGA-AC-A2FE-01,0.050285434584718,0.289542808294989,0.402613523300412,0.282342282446369,0,0.894093422365545,0,0.0180226492939385,0,0.261846140621744,0,0.106391411277575,0,0.0649760622910525,0.0578593766725468,0,0,0.0837629527142662,0.0412833287124696,0,0.117066236453027,0.167609042944731,0.0187930921198697,0,0,0.0623897068987799,0,0,0,0.0157979308132563,0,0.229523814495562,0,0.0932584398151231,0,…
TCGA-AC-A2FF-11,0.0916639543758078,0.174621880888959,0.232972287617191,0.162551702220397,0.220300405518546,0.635394995412969,0.073028897507513,0,0.0900534252081115,0.0683228595028532,0,0.0922237760261226,0,0.0391393450922436,0.00384191458741308,0.0213907381775308,0,0.00327506784878892,0,0.0692165672210063,0.0275524541994449,0.448349056084422,0.0196821259970081,0,0.0439237725475425,0,0,0,0.0454718…
TCGA-AC-A2FF-01,0.128381496437884,0.259755859271539,0.349356406290212,0.16351156432791,0.190171639631994,0.704203885697135,0.0420066460955589,0,0.0985883384468626,0.104593729411205,0,0.188341196864907,0,0.0207164193538333,0.00788713680680796,0.0371965098319848,0,0.0126469016604786,0,0,0.0719028104097864,0.195914459621988,0.0524272386184925,0,0.167778612878096,0,0,0,0.0327137198161887,0,0.07677811…
TCGA-AC-A2FG-01,0.082567893261013,0.0955719557462925,0.138686452287644,0.0680103163956983,0.0159665666346623,0.34842158566548,0.0436858261561045,0,0.148865393794374,0.0679613674221537,0,0.129480467212949,0,0.0212798597306424,0,0,0,0.0077025949816142,0.0191263119519201,0,0.0146209401589948,0.318031904784661,0.0605050280177615,0,0.168740305788825,0,0,0,0.0158490346739995,0,0.0540077410823083,0.0246…
TCGA-AC-A2FK-01,0.0765869781762039,0.208293813971063,0.327717919095317,0.203652794308752,0.155055144082627,0.557180888277458,0.00388372657812154,0,0.0159857301086942,0.122388631050832,0,0.171854030326916,0,0.108175469950197,0,0.0154379685476791,0,0,0.0262056462912067,0.197944091981808,0.0402614497874932,0.166717043405509,0.0088819368600044,0,0.122264275111539,0,0,0,0.00243341144903912,0,0.0100161…
TCGA-AC-A2FM-11,0.0169753120451154,0.0408078099160152,0.137346066505576,0.102515195630396,0,0.370164284251491,0.0179704128172812,0,0.0977273215980739,0.0762560476273561,0,0.0709139967398867,0,0.0601935809829644,0,0,0,0.0540989561002394,0.0291354743330248,0,0.0048670641249009,0.367232920335999,0,0,0,0.205609050845098,0,0.0159951744951759,0.00573132103645604,0,0.0311682686316989,0.0243204145818717,…
TCGA-AC-A2FM-01,0.0139202744557363,0.0486989588899362,0,0.0156532052116346,0,0.114016230935543,0.0517751383577213,0,0.105900466279482,0.0750689402897653,0,0.176733711612317,0,0.0502949162797433,0.00338549527493862,0,0,0.0491288357319515,0.0152785317488283,0,0.0698231066903675,0.298197731180489,0,0,0.0506160471301026,0.053080369406826,0,0.000716710017468107,0.0119719498067967,0,0.0244873332458271,…
TCGA-AC-A2FO-01,0.115686665215072,0.341020701745323,0.408164904960299,0.234810145501412,0.203070003084356,0.708685649020961,0.0690094342514663,0,0.105071890112758,0.115332472870095,0,0.197750328706825,0,0.0403500466115779,0.00610191971035087,0.0195377783911621,0,0.0314978230514684,0.0166077577823375,0,0.0639129937675077,0.216653687288017,0.0424788871112029,0,0.0756949803452317,0,0,0,0.06200610729…
TCGA-AC-A2QH-01,0,0.0349295904637658,0.0418133168383867,0.103378582193628,0.221846372239065,0.233555304736683,0.000874215742293425,0.00577440767535098,0.000231674433612575,0,0,0.00207257446186302,0.00289453093463327,0.0314733803693283,0.032578325161961,0,0.036172667136704,0,0,0.497431058111077,0.00578896524749868,0.356505599213479,0,0,0.0216830878903068,0,0,0.00651951362189153,0.00013131318955110…
TCGA-AC-A2QI-01,0.139494971054134,0.203028979024098,0.225714121729286,0.179253765636865,0.189504113111858,0.592645347670181,0.0366489929988905,0,0.0355020056164357,0.109562721430663,0,0.157020881395965,0,0.0544715602181057,0.01644694834443,0.000992448472360838,0,0.00818480693096566,0,0.0486517933713344,0.111790715416606,0.341638001458078,0.000763716933408869,0,0.0783254074127572,0,0,0,0.019959094…
TCGA-AC-A2QJ-01,0,0.148243781586021,0,0.0944063507210228,0.272629883454668,0.655560430274869,0.00725913938394333,0.00366946643228237,0,0.0233566534795127,0,0,0,0.0626891542223718,0.0227645046668941,0.0388452558013797,0,0.00759800862682249,0.041630846963207,0.195650541276423,0.00897796539405265,0.568314684489653,0,0,0,0.0192437792634578,0,0,0.00178869536860461,0.000904178479778425,0,0.005755219137…
TCGA-AC-A3BB-01,0.187897973111923,0.295567296247067,0.277841915721361,0.169885567497569,0.0279415516384863,0.832558052149116,0.026761585077762,0.0242604772809454,0.0542496139534874,0.190822281208738,0,0.0737901202278833,0,0.126893555722352,0.07816660251773,0,0,0.0762313460188502,0.0337708187751954,0.0255888495398163,0.0736675766153186,0.189288910957439,0.0010629082874874,0,0.0202042084332827,0.00…
TCGA-AC-A3EH-01,0.204730724142597,0.0960339723191007,0.110906833541328,0.0161914968952231,0.0245666351187652,0.381094898107535,0.0153316238913182,0,0,0.0465248716778464,0,0.0642072299380666,0,0.0279352194085833,0.00139824125983998,0.0141016096269267,0,0.0121291693221727,0,0.379280295030134,0.0423761237696608,0.352316778865372,0,0,0.0443988372100791,0,0,0,0.00343326461513254,0,0,0.010418478615666,…
TCGA-AC-A3HN-01,0.121678240864234,0.226337405232803,0.174091035024526,0.19718989223438,0.125085581387511,0.710204148353609,0.00750241449322846,0.018511642786322,0.020774977368322,0.107302040538616,0,0.139365464199903,0,0.0328963275181328,0.00912603254450103,0,0,0.0264150346753082,0,0.229970311565092,0.0389982592103544,0.279725167865424,0,0,0.0894123272347955,0,0,0,0.00501839788374795,0.0123825188…
TCGA-AC-A3OD-01,0.00137895276241226,0.290713589295994,0.316797414830232,0.195675407402473,0.233422013157119,0.822350419158526,0.0306725535858509,0,0,0.142811684069849,0,0.157476867573988,0,0.0346086984907691,0.0533522097599812,0,0,0.019398724134471,0,0.0704213761219731,0.0869891092121734,0.327769642870605,0.0342732466177708,0,0.0422258875625677,0,0,0,0.0255332388576745,0,0,0.118882988689416,0,0.1…
TCGA-AC-A3QP-01,0.0432181222416204,0.0833585242628089,0.0575047987563791,0.093237246950693,0.101618424919934,0.349564327497272,0.010894129753426,0,0.0964359941974203,0.119264657263798,0,0.0091382103567274,0,0.0824385214928859,0.00049261014912583,0.000997447034001168,0,0.0544484602778771,0.107851137646903,0,0.0564350209679865,0.379711367218323,0,0,0.0818924436415253,0,0,0,0.00341185041025126,0,0.0…
TCGA-AC-A3QQ-01,0.0669930945968118,0.0479276496962081,0,0.0101205921766289,0,0.162762553527503,0.0341612591851775,0,0.0665038511110416,0.18220042337383,0,0.0394964824668653,0,0.121836071826226,0.0347068416062993,0,0,0.0600659028871448,0.0153703007238454,0.0659724054326609,0.053425412959343,0.279911938547011,0,0,0.0385805968721252,0.0077685130084297,0,0,0.0083404661126745,0,0.0162369048970731,0.04…
TCGA-AC-A3TM-01,0.0309314620503687,0.088733609355953,0.0185277186184913,0.00590791791765371,0,0.161303660000092,0.00168119022255806,0,0.0889150468898499,0.286001936786553,0,0.0643064914774345,0,0.115201924278763,0.00187643974269214,0,0,0.0862777634076308,0.000540338857865064,0.0161523812390473,0.0330939611682115,0.231525873699134,0,0,0.0744266522302607,0,0,0,0.000419548295369242,0,0.0221891347301…
TCGA-AC-A3TN-01,0.0612527176708593,0.0676250855001471,0.00845978816135855,0,0,0.0929720448629534,0,0.0948510267319554,0,0.125938241481308,0,0,0,0.0922980001801393,0.0105776694570535,0.0494668205740734,0,0,0.0047953613068074,0.134179151792194,0.0591528733519088,0.295494752002871,0.00819857895457562,0,0.125047524167114,0,0,0,0,0.0157231244749574,0,0.0208763438329839,0,0,0,0.0152999181518934,0.00175…
TCGA-AC-A3W5-01,0.181663428339244,0.206973661544677,0.195637421119089,0.189377618085159,0.0893053402700541,0.816105689601891,0.0178905510518269,0.0100264508735361,0,0.131970657613133,0,0.0460452616847755,0,0.0813756170673488,0.0893525150076494,0,0,0.0376503973201282,0.00774005016312539,0.220151334835043,0.106470338739096,0.189466466396083,0.0155559618322681,0,0.0463043974159863,0,0,0,0.0111779780…
TCGA-AC-A3W6-01,0.0612535124357935,0.315628630739393,0.207982306381849,0.157870385900561,0.101750723822692,0.618692761754355,0.0103502387799866,0,0,0.13617026580549,0,0.237979916038181,0,0.052404811787438,0.0838882977864314,0,0,0,0.0184038086033162,0,0.153857087076192,0.201289718256502,0.0191739906342411,0,0.0864818652322212,0,0,0,0.00644332612524069,0,0,0.0847699700263938,0,0.148149452673147,0,0…
TCGA-AC-A3W7-01,0.0909272594711718,0.17782870926999,0.0651259774928368,0.0777362048083913,0.0649369497763389,0.296846883036799,0.00577424077494471,0,0.0538712506205807,0.134068518122532,0,0.155603869501448,0,0.0794506024685093,0,0,0,0.0444193840567254,0.0123496346622969,0,0.0471565653155516,0.338735380956578,0,0,0.128570553520833,0,0,0,0.00208561010388809,0,0.0194578696979338,0.048424488501232,0,…
TCGA-AC-A3YI-01,0,0.104096487925086,0.106717591733273,0.229849322984518,0.0147712433252877,0.484106530929686,0.0502998561918837,0,0.0267338607055643,0.0825576865528575,0,0.0285678398653343,0,0.0143848859328853,0.00938044824854102,0,0,0.0347871984292031,0.0503171667856369,0.302106012551683,0.0373544649879931,0.204297911284854,0,0.0133927976066571,0.0229535832735247,0.12282780209585,0,3.84854875320…
TCGA-AC-A3YJ-01,0.0310239094375302,0.0633562021045225,0.0110786912769156,0.0421313621874171,0.0607237040639867,0.272727979836303,0.0136369100276527,0,0,0.0689587861164646,0,0.0253779848144237,0,0.059673655273455,0.00229933141524403,0,0,0.0177250048192729,0.0481761616157935,0,0.0136714589165653,0.673119621620841,0.0218901040071347,0,0.0554709813731523,0,0,0,0.00335107082047048,0,0,0.01694561124927…
TCGA-AC-A4ZE-01,0.0223797199400801,0.133460272774112,0.0541862240733159,0.0227338049215908,0.0458355661014082,0.134972408848341,0.0595883917639042,0,0.053448265350471,0.14647875765912,0,0.127744922576497,0,0.0601942828921986,0,0.053942014737295,0,0.0277844492605145,0.00369813520637006,0,0.0526837630903545,0.29272380626628,0,0,0.121713211196995,0,0,0,0.0194054391654386,0,0.0174058576016993,0.04770…
TCGA-AC-A5EH-01,0.066866798609727,0.0755644781225044,0.0966753520783787,0.132307262170653,0.0087749207218716,0.601630651318694,0.00765853223298536,0,0.00298443013778297,0.0432272154579553,0,0.000675058977647842,0,0.0728793766700947,0.0654504383108141,0.000113692328688716,0.0434844383781809,0,0,0.332710822343498,0.0402811455001785,0.312093966065176,0,0,0.0409163999866361,0.0375244836103609,0,0,0.0…
TCGA-AC-A5XS-01,0.0659813648242462,0.156014695851659,0.15525320765669,0.171587460164204,0.137292912993199,0.59069518682717,0.00164999726620754,0.0172656792300635,0.097026438137024,0.0890135856733109,0,0.0977419270117949,0,0.126082764258225,0.0113278176304087,0.0555835731900828,0,0.067337273178727,0,0,0.0590847672452287,0.322886516728959,0,0.011264665977665,0.0178284836703778,0.00976267608477724,0…
TCGA-AC-A5XU-01,0.0480177027162296,0.0937495935376396,0,0.0200857033025902,0.0419154036943246,0.246660439923649,0,0.0079537395503857,0.184045662317357,0.0873554239520387,0,0.0661260812797393,0,0.0539917232205581,0.0286091894164246,0,0,0.0260825886947467,0,0.212734835087202,0.0634589630334991,0.241983598845071,0,0,0.0276581946029784,0,0,0,0,0.00203449433583004,0.0470772087955273,0.0223447240268053…
TCGA-AC-A62V-01,0.00572769190506007,0,0,0,0,0.109364921620284,0.0194518470008696,0,0,0.0577995556214971,0,0.042378064677126,0,0.0227019480357413,0.00438864776191741,0,0,0.0166666717628475,0.0117584518265094,0.243974633069959,0.00326640041268776,0.494226411085445,0,0,0.0833873687454002,0,0,0,0.00239729116885582,0,0,0.00712335256641756,0,0.00522277191462247,0,0.00279784123016562,0.00054086722573918…
TCGA-AC-A62X-01,0,0.00940186855864437,0,0.19467947929345,0,0.089099021514822,0,0.0887763752704763,0.0101522690645085,0.000993789588992282,0,0,0,0.116021677778176,0,0.0241982982725108,0,0.0112429667506848,0.0333463015460293,0.203981057251567,0,0,0,0.32834280482958,0.175097311116796,0,0,0.00784714853067868,0,0.00994590004083529,0.00113739103444614,0.000111337412499957,0,0,0,0.0129982780467891,0,0.0…
TCGA-AC-A62Y-01,0.0153713212081283,0.101058226877812,0.0666419466434701,0.148959299065011,0.122364879521548,0.480551988721938,0.0403393189821979,0,0,0.0339281254667915,0,0.0930521956307113,0,0.0297731384803368,0,0.00341028592900501,0,0.00888689304799168,0,0.325965375995504,0.0300159725096942,0.360951736217541,0,0,0,0.0736769577402271,0,0,0.0163881190810067,0,0,0.0137835286855113,0,0.0378030790112…
TCGA-AC-A6IV-01,0.0211031000227373,0.357027447140566,0.221369948099044,0.234239404529204,0.396724358807013,0.863017365486662,0.00689912883360207,0.000474958421161334,0.0205127855537607,0.127254766431672,0,0.14976258414059,0,0.0393816196072116,0.0501263110818577,0,0,0.00709589414202005,0.0344417547454123,0.00326936466047847,0.0687780873170642,0.380941972532464,0.00896270543782736,0,0.0962441210938…
TCGA-AC-A6IW-01,0.0374542542369783,0.305355430317311,0.0551980013575487,0.345077994156359,0.111006903330747,1.02689931480157,0.0058287910279772,0.0135099313971537,0.00203220937758162,0.0980586319025206,0,0.0712071598925993,0.00413449306514835,0.136848055874394,0.0268173672146269,0.012004789399216,0,0.0722673110607915,0.0611577867349806,0,0.113465895586421,0.227877235395802,0.128188152020764,0,0,0…
TCGA-AC-A6IX-06,0.453157215556119,0.436646133209092,0.231231775727346,0.215054929215792,0,0.784404853936773,0.100899477207146,0.15884348432908,0,0.150777767239408,0,0.176620735739343,0,0.0360992201387693,0.0816320242662986,0,0,0.0546723304441463,0.0159762939657842,0,0.0506033228925104,0.144772565484042,0.000825593790007201,0,0.0282724758149577,0,0,4.70868850630834e-06,0.0938404021996392,0.1477305…
TCGA-AC-A6IX-01,0.0818257955114516,0.167449254844045,0.139932906697716,0.144822084766024,0.133340625508386,0.522494521443402,0.051261792879516,0,0.112789280782652,0.0796068497162621,0,0.155686025362328,0,0.0352768550697256,0.00806727855270748,0,0,0.0412485905027245,0.0124086599441715,0,0.0503748538388244,0.332242193126923,0,0.013841283743011,0.107196336481155,0,0,0,0.0300955474315591,0,0.06621803…
TCGA-AC-A6NO-01,0.109776640378917,0.0961814172914913,0,0.0158119582406643,0,0.175455099516231,0.0341188078323136,0.0213460672130591,0.0841503234857533,0.0988451211965626,0,0.0619905310195625,0,0.150034294172951,0.00500629072201136,0,0,0.0482908549926425,0,0.0951035846647335,0.0592437997761403,0.273746190953198,0.0188860999372047,0,0.0492380340338678,0,0,0,0.00893116984381373,0.00558769089219863,0…
TCGA-AC-A7VB-01,0.0902777220211265,0.0436992654966665,0.000437196512475994,0,0,0.0704674406719799,0.114491056594404,0,0.109430784308323,0.0792076151103413,0,0,0,0.0266280109270322,0.0424060906321667,0,0.00166957001427761,0.0150441757838831,0.00334137678560906,0.261893058969021,0.0293774589695298,0.286567338384846,0,0,0.0281096715288959,0,0,0.00183379199167039,0.0141323781298506,0,0.01350775570505…
TCGA-AC-A7VC-01,0.0597623340605393,0.116417706657217,0,0.0615082369899183,0.0442761317987613,0.330485574307335,0.0102873591052284,0,0,0,0,0,0.013497870077183,0.0597787297529867,0.0322210828760831,0.0428251005636479,0.0230477034316028,0,0.0334193192410633,0.524494234402948,0.0170165561936535,0.201478506711501,0.0152356052506038,0,0.00422969509775635,0.0224682372957431,0,0,0.00166920990196507,0,0,0…
TCGA-AC-A8OP-01,0.0248404970682607,0.113711676664104,0.0701910144376113,0.0897807649280536,0.0410307390198794,0.264305492925764,0.0568390616584269,0.00787160056518116,0.0180777118517933,0.063100433876407,0,0.125386356706625,0,0.115485988162871,0,0,0,0.0673705829807823,0.0128186454472777,0.0494383594395922,0.0648071829679053,0.300578721940159,0,0,0.0645366509505569,0.0536887034524229,0,0,0.0251435…
TCGA-AC-A8OQ-01,0.203388367698488,0.333117713998416,0,0.149806052060819,0,0.654967230021486,0.0280040104179198,0,0.172632300343297,0.0850877559219342,0,0.111926298924501,0,0.0782862649826868,0.0565125862857431,0,0,0.046746506563772,0.00456194025681395,0.0988289331830309,0.113397075337834,0.182603159584678,0,0,0.0214131681977895,0,0,0,0.0204926091815723,0,0.126327844128611,0.0622650149826194,0,0.0…
TCGA-AC-A8OR-01,0.0245005711358669,0.090485494077784,0,0.0437247664491788,0.0204325810883179,0.239741153858687,0.00339094138740087,0.0026503489515167,0.00350412619467896,0.00787100827695089,0,0.102524584299299,0,0.0163528782276025,0.0507635976242165,0,0.0452247788859023,0.0153296236578657,0.0196356779774,0.216912149422343,0.016808786664699,0.453496432281765,0.0114499103283351,0,0.0340851558200241…
TCGA-AC-A8OS-01,0.0865725485290303,0.211143382966223,0.130768170570265,0.0892979786343357,0.100216980699311,0.390901017162964,0.0251396341632404,0.00372980369810893,0.0323095765700831,0.18927187354221,0,0.116680131197463,0,0.0628275140086154,0.0060509347749044,0,0,0.0260317020719978,0.0217344463659846,0,0.0666307364986507,0.236346308010841,0,0,0.2132473390979,0,0,0,0.0136961675369007,0.0020320111…
TCGA-AN-A03X-01,0.0163296374521954,0.0130569161789419,0.0989717335257308,0.0665961106127455,0.0619638460521874,0.318955464698455,0.00342817657885257,0,0.0064820033242219,0.0320956869239276,0,0.106402120681145,0,0.0284980016677035,0,0,0,0.0144242993057043,0.00160715975252074,0,0.0377001803873321,0.506295089878736,0.00363586029026229,0,0.254877177685458,0,0,0.0045542435241359,0.000610457214140917,0…
TCGA-AN-A03Y-01,0.144212550837156,0.0345518662618397,0.13902662576595,0,0,0.160018238688847,0.0384079965555944,0,0.0484133877592157,0.17522275929666,0,0.181533164697245,0,0.102747829922474,0.00901641456837959,0,0,0.0146393922889769,0.0162379452768565,0.005233929632244,0.0795014685680092,0.266951286404094,0,0,0.0595890336433498,0,0,0.00250539138690079,0.0098878521717014,0,0.012463665492197,0.04510…
TCGA-AN-A041-01,0.0211896906939389,0.114953971207105,0.0185034472163382,0.066347451602654,0,0.343398164744023,0.0485064244070872,0,0.0644316407238181,0.0178199044249917,0,0.0800827205352675,0,0.0261146543721596,0.0208243626579795,0,0,0.0149850858991473,0.00283676223796538,0.336438531703365,0.0386657539661734,0.311128381700199,0,0,0.0381657773718459,0,0,0,0.0118256536635477,0,0.0157081516002792,0.…
TCGA-AN-A046-01,0.0296744490175666,0.0758727759915801,0.158635378653488,0.0965120727942005,0,0.34684180433184,0.00345126584758169,0,0,0.212809781751665,0,0.0155481862968065,0,0.208209891943486,0.0144978016975351,0.0300017384355288,0,0.0628177631096453,0.016435735773867,0,0.154439106659878,0.247861334359454,0.0326750333739232,0,0.00125236075062997,0,0,0,0.00123252103276688,0,0,0.0759989359183226,0…
TCGA-AN-A049-01,0.114085286663659,0.118045971936258,0.115606834569009,0.0891441953503082,0.0615094935046969,0.457591810732802,0.0730787466237248,0,0.043593593196277,0.0630668592310609,0,0.170520808771192,0,0.0329004097904021,0.00633064791032348,0,0,0.00804722323250856,0.00907862275292855,0.0495881070854847,0.0907253287125025,0.39234227415307,0.0102094801198673,0,0.046825046216312,0,0,0.0036928522…
TCGA-AN-A04A-01,0.0171139567656079,0.0340886903309421,0.0586299973876147,0.0557748807328869,0.0339730359042239,0.196986279193616,0.0787283750927479,0,0.0663819790185915,0.0637526520357716,0,0.120347763096278,0,0.0137441685218176,0,0.0138203974894875,0,0.0130273562287947,0,0.138402443633616,0.0678855908789209,0.361457689103509,0.0216712420274628,0,0.0331726021965698,0.00718328518506602,0,0.0004244…
TCGA-AN-A04C-01,0.118267868929362,0.0135199006253384,0.0521231236033472,0.000927002497597525,0,0.203631588448188,0.0471104548571198,0,0.0631484643282969,0.0663251693727154,0,0.160515350773768,0,0.11050435397321,0.00411036212906915,0,0,0.0631037025042758,0.00599778276594549,0.0337037535834792,0.0969927858692415,0.317500172920351,0,0.0125007520609451,0,0.0170750139764671,0,0.00141188088511659,0.008…
TCGA-AN-A04D-01,0.0666238042594242,0,0,0.00579795525148122,0.00985224701652189,0.14968222738421,0.0237968659850195,0,0.0086249189942912,0.121527306339962,0,0.0663180132112318,0,0.155415146738604,0.0203233925897191,0,0,0.0193258112169564,0.0515117355980599,0.0540138287269484,0.0119109477841277,0.321538497963574,0,0.00755783194490425,0.132909747812178,0,0.0052259550944245,0,0.00280240317391349,0,0.…
TCGA-AN-A0AJ-01,0.0779833983588426,0.104897737494673,0.165978857363003,0.123501923073543,0.000474343523572339,0.534156631299916,0.018056815350964,0,0,0.146010603066343,0,0.113433639399668,0,0.0708601159246229,0.0143534568383587,0.0180236521850115,0,0.0500735318292395,0.00375586789056433,0.143165913754139,0.117697934566299,0.274877451176986,0.00626394820358893,0,0.0232758225865366,0,0,0.0001512472…
TCGA-AN-A0AK-01,0.0273408754517578,0.0205458330745507,0,0.0149115648980313,0,0.206867930877763,0.0225202085994225,0,0.0383010410140513,0.0691113666781713,0,0.121556201324498,0,0.0477106124868505,0.00302595583166073,0.003817830878212,0,0.0452058013956567,0,0.106915575085581,0.06735895362999,0.474476453075906,0,0,0,0,0,0,0.00517946755735031,0,0.00880893258467016,0.0158950606506775,0,0.0279569524578…
TCGA-AN-A0AL-01,0.28605317306587,0.187113063707854,0.084207125362804,0.189672885561177,0,0.568091933786822,0.140680739863487,0,0.0656152018817473,0.030562216272473,0,0.206223711568827,0,0.067927612921757,0.018929552152987,0,0.00462351443277007,0.0239279726743974,0.00617481700273761,0.116373803089629,0.0763077175376673,0.208772128537193,0,0.0059209129573764,0.0279600991069522,0,0,0,0.0808784673881…
TCGA-AN-A0AM-01,0.0423940646609335,0.0592061830334918,0,0.126264219779028,0,0.267637567178328,0.0389762713116964,0,0.0616212572767575,0.0884087583672469,0,0.102237207103102,0,0.144990793477568,0.0177937138079589,0,0,0.0633195939820056,0,0.00234724075891549,0.147658536910875,0.317751550598603,0,0.00480823348127894,0,0.00396939571636811,0,0.00611744720762455,0.0141008363088487,0,0.022293339838905,0…
TCGA-AN-A0AR-01,0.0443155953404249,0,0,0.00523917087875145,0,0.126763136680775,0.00195073984288258,0,0.118766653933202,0.0378874855859861,0,0.0857045692508868,0,0.0370129100403211,0.0822490876874056,0,0,0.0601405700452105,0.027102377790098,0.0709017543864006,0.0298991968432425,0.272662787051997,0.133286455662861,0,0.0424354118795064,0,0,0,0.000338802828643244,0,0.0206272909470092,0.00658026611469…
TCGA-AN-A0AS-01,0,0.0884417587806316,0,0.0788701353128942,0.122048237312407,0.39386189213898,0.0237888405924274,0,0,0.0207110961587515,0,0.0251698080470285,0,0.0247081554726919,0.0229520517159449,0,0,0.00993865599915339,0,0.563252316369928,0.0208322160802132,0.259133389768795,0,0,0.0187346936597816,0.00467502184347447,0,0.0061037542918097,0.0047509634874158,0,0,0.00413629496789805,0,0.00502676196…
TCGA-AN-A0AT-01,0.0801845901730297,0.0718969853104371,0.0507800017679006,0.110948581001862,0,0.382176223637799,0.0422112577389657,0,0.0210681541004293,0.087053815940004,0,0.125608486683927,0,0.0991620717502898,0.0131584508295776,0,0,0.000393639310395192,0,0.301188828460141,0.0856881874184797,0.185538405929467,0,0,0,0.0389287018383233,0,0,0.01655368468081,0,0.00826214613035045,0.0341392674969227,0…
TCGA-AN-A0FD-01,0,0.0634280050754585,0,0.0429617281039306,0,0.204800226295283,0.00216152972618052,0,0.11998979915071,0.0734157217312617,0,0.0510326083928053,0,0.146843134505196,0.00777394576945597,0,0.020400766303495,0.0254043697288988,0,0.185168825038816,0.172332923614921,0.153917321315807,0.00815355729711493,0,0,0.0334054974253377,0,0,0.000552909718772011,0,0.0306928585345713,0.0187794160608671…
TCGA-AN-A0FF-01,0.0828104115162194,0.198770176642116,0.0854453001570972,0.117082519632058,0.0959422433912473,0.503026449282414,0.0126180938026927,0.00717286754737898,0,0.0757451069631318,0,0,0,0.0774305570766989,0.0837261783877385,0,0.0193995441901218,0,0.0117165727912081,0.238806002979121,0.105225670484675,0.317082277092615,0.0134271928492048,0,0.0376499358354145,0,0,0,0.00558698338019266,0.0031…
TCGA-AN-A0FJ-01,0.0951389994502203,0.135738585228511,0,0.158381958007868,0,0.397431368543041,0.0249121181478532,0,0.0248419835064521,0.0688428196514461,0,0.257304585731686,0,0.0514259227734131,0.00241073898424076,0,0.0186177966203119,0,0,0.275946398735327,0.0724862393877917,0.188460665120817,0.00738635410274106,0,0.00736437723792039,0,0,0,0.00677449379204533,0,0.00675542168063517,0.01872081898406…
TCGA-AN-A0FK-01,0.0599524164588605,0.069866814383118,0.025945156529962,0.00279117333812025,0,0.127647359565167,0.0868965745699867,0,0.0756853872488755,0.0506666698920631,0,0.00205632510916971,0,0.0320163184805999,0.0448999342204812,0.000581520270948248,0,0.0330637626224858,0,0.282668153661893,0.0640281845693686,0.317740898383105,0,0,0.00969627097102324,0,0,0,0.0133099235629962,0,0.011592709195999…
TCGA-AN-A0FL-01,0.0929640132655503,0,0,0,0,0.0663030430750203,0.0344268950448858,0,0.0500805472505131,0.0268017726572428,0,0.108682782905257,0,0.0199915148285975,0,0,0.0102654055123075,0.0176024279723999,0.0186873154556742,0.226503151472543,0.0259193978594186,0.364285269893241,0,0.0691045012554584,0.0276490178924606,0,0,0,0.00340854264334971,0,0.00495838154103363,0.00265359350300013,0,0.010760479…
TCGA-AN-A0FN-01,0.142650322233022,0.308171321012626,0.535134331236618,0.343201838945788,0.175478416491014,0.98122892608251,0.010809664722402,0.0314151587728644,0.046734960788571,0.0604182404985013,0,0.281260792733642,0,0.0850109502097806,0,0.0799021666135794,0,0.0477502369361503,0,0.00056054504623498,0.0977271175545796,0.165153594084412,0.00790775090144484,0,0.0741826261117885,0.00920088938148491…
TCGA-AN-A0FS-01,0.0969130330717069,0.0982497476395001,0.162139769181851,0.0688140556022765,0.0495408137208999,0.353603055283108,0.124542087281512,0,0.0974359586335288,0.0420266851244529,0,0.0688309194441514,0,0.0390215209149489,0,0,0,0.0392003600761854,0.0196114977344189,0,0.0164781890360324,0.383753500408372,0,0,0.0983640995989127,0.0707351817474847,0,0,0.0319079370497532,0,0.0249632915452391,0.…
TCGA-AN-A0FT-01,0.0433008017914326,0.0384771216377408,0,0.0043096699727084,0,0.16772338661906,0.0307990243533932,0,0.0242046026990983,0.0770687398244878,0,0.134131440753336,0,0.0521891569872335,0,0.0239567207105727,0,0.0640008382330259,0.000726244235514141,0,0.0746594145640777,0.452836531545116,0,0,0.0336968323743377,0.0297336564372134,0,0.00199679728259376,0.00512901374879844,0,0.004030833529121…
TCGA-AN-A0FV-01,0.0720663375497908,0.00922077577257057,0.108259538623783,0.0494263358154256,0.0271924885792282,0.334940240832753,0.00143417340173429,0.00630191650194198,0.00422787983902098,0.00422565193250023,0,0.0959709040102266,0,0.122577022555639,0.0274699789329774,0,0,0.000357692612158422,0,0.39379501930826,0.00216480740025402,0.292537536698367,0,0,0.0489374168069192,0,0,0,0.00022367530881275…
TCGA-AN-A0FW-01,0.0289934434385562,0.023431162130536,0.0663740005267699,0,0,0.131824092384541,0.00716414524638426,0.0131133755844954,0,0.166782243997447,0,0.111834171977343,0,0.0381796574040545,0.0242673895163506,0.0447445480626469,0,0.00258201629858902,0.0463398966518111,0,0.0950346815479372,0.3217216791091,0.0293904921875198,0,0.0988457024163215,0,0,0,0.00167322192102868,0.00306269439438485,0,0…
TCGA-AN-A0FX-01,0.0435952740094859,0.123428989301327,0.114769917236248,0.0820448663612375,0,0.356160626158627,0.0291556648769317,0,0.0461944784235689,0.0465677501969694,0,0.0321408873833492,0,0.0825656517999152,0.0301160269903604,0,0.00740146730006551,0,0,0.34302532938625,0.124258318577814,0.223371122422917,0,0,0,0.0352033026418587,0,0,0.00926309518695103,0,0.0146765252157785,0.0147951180169444,0…
TCGA-AN-A0FY-01,0.0721569185052578,0.134469718657404,0.00385742475352338,0.0370986579058286,0.0322378832071703,0.322122442738478,0.0375427719984615,0,0.00201104951940133,0.051973234467938,0,0.139639092959832,0,0.0342735566829932,0.0128657569361489,0,0,0.0164640766412309,0.00767558140972614,0.214181042167343,0.0920477189015253,0.371867442088264,0.0016403922187308,0,0.0178182840084043,0,0,0,0.00937…
TCGA-AN-A0FZ-01,0.0772628071013467,0.0956626116026616,0.0831886967231696,0.0314765365875044,0.0497211152510036,0.295918389970086,0.052396419847721,0,0.0136546503072527,0,0.0102456594590376,0.152771356229119,0,0.0281461420677552,0.0541044546992988,0,0.0801865225427255,0,0.00127778676873542,0.261594555789358,0.0345166813113016,0.266329491841926,0.0118477049180725,0,0.0329285742176971,0,0,0,0.007140…
TCGA-AN-A0G0-01,0.08260285905141,0.0124229604118531,0.0717714826051854,0.0704732399983269,0.18610505642607,0.264447281127795,0,0,0.0724781585802993,0.0394089911775032,0,0.11109647149496,0.0142906458574667,0.0773601328551774,0.0055593853343296,0,0.0148786980774565,0.0427494930583593,0.0102431102711144,0.131933759387869,0.0909005411284941,0.384287658866901,0,0,0,0.00348150344949758,0,0.001331450460…
TCGA-AN-A0XL-01,0.013573218417901,0.119562704319971,0.176781531970817,0.108880510893731,0.0975761515341942,0.400698826239392,0.0423015953383222,0,0.0159927010416132,0.0669227246567414,0,0.138672096567889,0,0.0412919136390466,0,0.00564166562099276,0,0.030661248403555,0.0532992290240678,0,0.0581492080033488,0.380585166167859,0,0,0.134723715894265,0.0317587356423002,0,0,0.0146869304675909,0,0.005552…
TCGA-AN-A0XN-01,0,0.113436245327425,0.131570747079306,0.248286219058655,0.248803183289076,0.756385880481484,0.0159892115147889,0,0.00259685361855473,0.0115412407206401,0,0.0799889072400664,0,0.0224108121112505,0.00283122943760027,0.00560532523439051,0,0,0,0.387436336933423,0.0408600598084265,0.342631072608994,0,0,0,0.0881089507718649,0,0,0.00583662733211343,0,0.000947943355026302,0.00421296078135…
TCGA-AN-A0XO-01,0.0265903566827975,0.0481404437693442,0.0344696029394633,0,0,0.147724030146143,0.00239157456735883,0.00667221409501407,0.0137143394918603,0,0,0.177662399055714,0,0.0132816587228885,0.0476114446392826,0,0.0664356564659363,0,0,0.525195354667306,0,0.0978448407987877,0,0.0318722129569068,0.0173183045389444,0,0,0,0.000342758394207679,0.000956255941265716,0.00196552724970658,0,0,0.02546…
TCGA-AN-A0XP-01,0.0280798507300369,0.102350001013556,0.0384756211046395,0.0530838098124438,0,0.183885132909568,0.0439595808944883,0,0.017327061195235,0.0411860677732139,0,0.0534014725230773,0,0.0196767629085397,0.037655235027452,0,0.00273958585468515,0.00671258481702683,0.00126274313647473,0.0244686352307108,0.0474671367901031,0.586995869678624,0,0.00790490387557726,0.102779853489479,0,0,0.006462…
TCGA-AN-A0XR-01,0.08612342688405,0.0928998788667204,0,0.0196279821637713,0,0.206629440267074,0.0365376939931029,0,0.0421146925725749,0.00968756587821525,0,0.0561877162240715,0,0.0359950264501687,0.0329825501037001,0,0.00679370978206388,0.0130322180387803,0,0.455905800198169,0.0520665535078741,0.153263359310758,0.053004687545922,0,0.0524284263946001,0,0,0,0.00633603150503418,0,0.00730314340623231,…
TCGA-AN-A0XS-01,0.143159812711692,0.227581408418345,0.214614175334228,0.14070580052024,0.0560780171760028,0.635133008598529,0.0117490377449249,0.0172713746740221,0.149395673772537,0.152111797590834,0,0.230167949937192,0,0.0401102103059572,0.0128761919441987,0,0,0.0415493397077019,0.0177409988447511,0.0127456236549414,0.065730833969238,0.205302640450728,0,0,0.0429624237983944,0,0,0.000285903604579…
TCGA-AN-A0XT-01,0.0416656042009665,0.0939104019120866,0.0829503333674818,0.0196383509418114,0,0.169387975742357,0.0280923019637762,0.00829281704805038,0.0880584799611864,0.0694059997067805,0,0.0793889933053577,0,0.0747743947094305,0.0442857974688941,0,0,0.0390048594267279,0.021675657078539,0.00314588504998364,0.0908153837197772,0.276176370206969,0,0,0.176883060354527,0,0,0,0.00545362252777376,0.0…
TCGA-AN-A0XU-01,0.0185766138471913,0.0813768483405454,0.267499959586014,0.180632791109647,0.103327056282074,0.559169887124316,0.0366340110340403,0,0.0862921577666445,0.0997236481947322,0,0.0262443974919212,0.0312372074085034,0.0979317546706833,0,0,0,0.0997447358503783,0,0.150566979590534,0.119051303785095,0.232596890345058,0.0148301772874907,0,0,0.00514673657491806,0,0,0.0177776374518577,0,0.0418…
TCGA-AN-A0XV-01,0.0499264447010888,0.131244776649551,0.20313169451261,0.0744718950658524,0.0103807301596437,0.354358048610621,0.00527376348845821,0.0136177686929428,0.0632746073040159,0.162231176292778,0,0.0761742982704893,0,0.0719286030727244,0.0218361648114799,0.0654863001734376,0,0.0438931088124009,0.0116365485637318,0.0825540268077785,0.148515235977777,0.129351149623467,0.00473227178737802,0,…
TCGA-AN-A0XW-01,0.073876139863426,0.211813926218925,0.226800205409555,0.263756552855805,0.141564844064999,0.808864891328859,0.0149090548521481,0,0.0500455000494111,0.159148398531574,0,0.0931079621120849,0.00337288366258506,0.0962852804358393,0.0350841066484519,0.000851998903283432,0,0.0547939234211819,0.0586984555327834,0,0.119825101347424,0.28998511147658,0,0,0.023892223026653,0,0,0,0.0097137713…
TCGA-AO-A03L-01,0.117054336171677,0.104416844075288,0.130402093276733,0.113167344880145,0,0.338361824818134,0.0496993702339258,0,0.067529363114615,0.116534226595244,0,0.238125432435423,0,0.072212763546015,0.00814495435253591,0,0.004423027994291,0.00390743444420265,0.0476753546283924,0,0.0922112642814389,0.224322299940137,0,0,0.0752145084337797,0,0,0,0.0207740693182577,0,0.0282269103966068,0.04871…
TCGA-AO-A03M-01,0.105997487990262,0.203815930357481,0.260300601616797,0.174427675250399,0.0580629716833866,0.619635779469363,0.0397581223447219,0,0.0301376828348898,0.127588290754491,0,0.243853173851686,0.036142185949907,0.085802915163925,0.0154709651289455,0,0.00296377124876636,0,0.0134258460021646,0.00950278182781549,0.161068406396372,0.183378839017825,0.015540173842093,0,0.0353668456363967,0,0…
TCGA-AO-A03N-01,0.0871910807232338,0.0253184515369417,0.0116450944291567,0,0,0.0584139944484081,0.045509411504478,0,0.0293394056514107,0.0265588189098957,0,0,0,0.0919161334730468,0.0267347675942719,0.00933845685419055,0,0,0,0.486137934587544,0.0535708673838682,0.177784699480452,0,0,0.0531095045608425,0,0,0,0.00575575293223893,0,0.0037106691676652,0.00335899750763407,0,0,0,0.0116249922217846,0.003…
TCGA-AO-A03O-01,0.000770814785761811,0.129045012736305,0.09909600239813,0.128140757584111,0,0.377076971627703,0.0204691031195514,0,0.0330116042060128,0.0724820594607218,0,0.162911650189533,0,0.0784077261421276,0.0296261831861284,0.00979079905204642,0,0.0383765907862775,0.0184957341130947,0.0803166836854938,0.109771681448932,0.325325674508684,0.00183832845667981,0,0.0191761816447165,0,0,0,0.008750…
TCGA-AO-A03P-01,0.0489801449136582,0,0,0,0,0.0223474171454856,0.000399402983927293,0.00623752952782022,0,0.0722463243865343,0,0.0788569419374061,0,0.0433474036478186,0.0713979520419586,0,0,0.00139558509535632,0,0.189633541409012,0.102568734934665,0.354774525371966,0.00141636244539063,0,0.0777256962181437,0,0,0,6.69473631847209e-05,0.00104552587606711,0,0.0121098266966051,0,0.0132178890593392,0,0.…
TCGA-AO-A03R-01,0.110658692899276,0.0447008212862406,0.159929650090531,0.0113660745026953,0,0.174702487238141,0.0196573578984759,0.00168352978481801,0.0759387462994202,0.16144141979162,0,0.229303007779619,0,0.118119460344638,0.0220650835135534,0,0,0.0794883602359212,0.0260315492106612,0,0.0800861649965191,0.178058056239099,0.00442014590036652,0.00370711800528877,0,0,0,0,0.00565459785530514,0.0004…
TCGA-AO-A03T-01,0.0425592329303259,0,0.0312841590179184,0,0,0.00235042084329879,0.0269771529009209,0,0.0709144743164132,0.111785722054537,0,0.149783810567455,0,0.0789971949833802,0.0210884421794017,0,0,0.0641406305156137,0.0122327970057961,0.117177364501493,0.10923932471784,0.208596993315883,0.00960237920257934,0,0.0194637137386867,0,0,0,0.00479576186769189,0,0.0126065538881407,0.0198722861953031…
TCGA-AO-A03U-01,0.0481935244066512,0,0.561925995238413,0.424337385948612,0.291614511328369,0.810966656223043,0.00545354224062522,0,0.00994631039047043,0.0473266630489675,0,0.145468351730112,0,0.0174759083813954,0.0132131899566418,0,0,0.167916117942889,0.0584649821346677,0,0.0169581754934685,0.403368219180951,0.0218642501230449,0,0.0925442893767667,0,0,0,0.0025266556461757,0,0.0046081794543535,0.0…
TCGA-AO-A03V-01,0.0877572968250015,0.119503629725046,0.119845392152791,0.0621869416889224,0,0.273036326979521,0.0698269639443465,0,0.113735437511969,0.0919579040832621,0,0.161373380003263,0,0.0487989373043476,0.0129519411557754,0,0,0.0276956049993532,0,0,0.138355565922601,0.290923624963155,0,0.0108103410532986,0.0335702990586281,0,0,0,0.0192292229219559,0,0.0313209104120142,0.02532372792926,0,0.0…
TCGA-AO-A0J2-01,0.0409801542875275,0,0.271236619469803,0.134039672586312,0,0.435295865909611,0.0492843113795931,0,0.0572852149454839,0.164061308523922,0,0.0454736691995621,0.000456372100678018,0.145122725600092,0,0,0,0.1342479726578,0.00502970200445758,0,0.141470818250722,0.249503300943339,0.00208695115552729,0.00132962300235078,0.00464803023647149,0,0,0,0.0144155697361743,0,0.0167558192005153,0.…
TCGA-AO-A0J3-01,0.012315325459008,0,0,0,0,0.0223992011597578,0.0207516049295134,0,0.0272913079992916,0.104148931223997,0,0.0997567882726171,0,0.0233720648858672,0.0104216773320885,0,0,0.0728122983158601,0.0196223840318725,0,0.0399301372940633,0.413663056306728,0,0,0.168229749408101,0,0,0,0.00285290464947065,0,0.00375197483499608,0.014318264593779,0,0.0137144382830096,0,0.00321316220153117,0.00143…
TCGA-AO-A0J4-01,0.217217227572348,0.384196797847881,0.0735388203942783,0.214049318877391,0,0.68393458664687,0.0898123765831236,0.00789887606589429,0,0.0983370084452648,0,0.152112024167756,0,0.103439632690202,0.0665564775079281,0,0.00105317506786859,0.0206964203388968,0.0250871042315066,0.124383004805497,0.151626915474482,0.114319409025073,0.00419569451883064,0,0.0404818810776766,0,0,0,0.068192572…
TCGA-AO-A0J5-01,0.0479788491020525,0.113294747842723,0.064986921235999,0.0898545358709111,0.142246496088627,0.313575895982279,0.0556338052629158,0,0.0955404432064838,0.0461739096529493,0,0.127463155652205,0,0.0194585209514322,0,0,0,0.0026518817479566,0.00880629573997362,0,0.0357343416783106,0.455128761064756,0,0,0.146356609629856,0,0,0.00705227541316066,0.0168742061980586,0,0.0289782288179154,0.0…
TCGA-AO-A0J6-01,0.0351582515208534,0.0673907360085611,0.0887366453704355,0.247333581029082,0,0.473389886582883,0,0,0.0476958784519333,0.207111303823809,0,0,0.0286378548011824,0.0928858821829995,0.00531634958193688,0,0,0.122115334836393,0.0041216981986005,0,0.0925689762503308,0.182966287360776,0,0.184567974976013,0,0.0276782791255991,0,0.00433418041042781,0,0,0.0186664424593968,0.0810558765452631,…
TCGA-AO-A0J7-01,0.0346958955687684,0,0.0217368918203117,0,0,0,0.015301165371875,0,0,0.0264001342628573,0,0.0834675631209732,0,0.0316034781060158,0.106887514137131,0,0.0939944632602129,0,0.0250023876669743,0.225017890299991,0.0168100087616809,0.15667786672107,0.00641085012503714,0,0.21242667816618,0,0,0,0.00182693070765867,0,0,0.00315212696542575,0,0.0099658719093014,0,0.003773396549705,0.01276217…
TCGA-AO-A0J8-01,0.0885900834450797,0.170901143021223,0.116414513992521,0.102229299539409,0.00249170520095437,0.525278299599595,0.0273370536271895,0,0,0.0611373409309959,0,0.11150327022971,0,0.0294981568330837,0.0347011832332542,0,0,0.0342762892277413,0,0.362481849865967,0.0873385873373688,0.153711238301993,0.00424296522418673,0,0.0937720651885089,0,0,0,0.011829955672724,0,0,0.0264568392419053,0,0…
TCGA-AO-A0J9-01,0.00400319068815227,0.112588338948566,0.130424009637634,0.0530508287889578,0.0412497883143242,0.433562059972478,0.00587063066537645,0,0,0.109228524059414,0,0.190718540810387,0,0.0213830876092282,0.0316662121206591,0,0,0.0612140547720301,0.00624188017294422,0.139156850754911,0.0527878252731082,0.335800530467579,0.00873347131805728,0,0.0371983919763047,0,0,0,0.00202943462606843,0,0,…
TCGA-AO-A0JA-01,0.149353915325759,0.164297733161912,0.128033461439219,0.153688992084083,0.210872678876514,0.552891263191226,0.067934603581418,0,0.0961025148593359,0.057251229718355,0,0.149505502680492,0,0.011960609372394,0.0117231513760686,0.0104494237259369,0,0,0.0249002988280969,0,0.0730071354830951,0.427757741489833,0,0.00113235784696722,0.0541395065048481,0,0,0.014135924533159,0.0307785935810…
TCGA-AO-A0JB-01,0.0433303401823543,0,0,0,0,0,0,0.00531099786756773,0.0875847526562104,0.131390095737287,0,0.099810061008002,0,0.107506655550127,0.0292760376846182,0,0,0.0464538688226501,0.0136655516223285,0.00217193275415608,0.0518324397774866,0.384811035595069,0,0.00479114343921786,0.0353954274852789,0,0,0,0,0.000684668959859012,0.0112910159250543,0.0169381955006174,0,0.0128670453948251,0,0.0138…
TCGA-AO-A0JC-01,1.7090801348405,2.08425964558724,1.14346312208893,0.762469775317003,0,2.47937303981726,0.13443333484495,0.168467478913243,0,0.176901369275598,0,0.166062946756564,0.00923161029635848,0.0857775307924474,0.0410022451452279,0,0,0.0432415707877402,0.000686144055558302,0.0200400375594192,0.0352073542429953,0.0977581487283614,0,0,0.0211902286015359,0,0,0,0.215595662624162,0.2701774659448…
TCGA-AO-A0JD-01,0.0605624206791233,0.00964270838243762,0.0742049383342526,0.0324195557028643,0,0.212916918955657,0.0531249236058036,0,0.0149202529943609,0.0959886801036217,0,0.115159675512577,0.0155993443108584,0.0626156891913987,0.00997441763080444,0,0,0.0382053272003285,0.0189785663664467,0.0519168703051097,0.095136810617229,0.372533828687365,0.0408012235860725,0,0,0.0148602632327215,0,0.000184…
TCGA-AO-A0JE-01,0.212370861200622,0.11923652355705,0.234393093966201,0.195395020715054,0,0.962134743847574,0.0197348403702893,0,0.0327581391426923,0.108871955427353,0,0.168980292026636,0,0.0910477242333447,0.0441542898632682,0,0,0.0403422899912386,0.00835050361450608,0,0.132170682241878,0.258122638122466,0.0236963257422747,0,0.0717703192240528,0,0,0,0.0127482468185338,0,0.0211609942249963,0.07032…
TCGA-AO-A0JF-01,0.155367915715112,0.156972922852577,0.327991388021375,0.154348113789229,0.225729149932521,0.808295241415649,0.0393225021353294,0,0.00309991377422623,0.106869315310947,0,0.196648902773025,0,0.0148591068807052,0,0.00371148817603271,0,0.0132224574081413,0.00563556163234936,0,0.0456227920688906,0.342982543032941,0.0620272111169386,0,0.165998205690475,0,0,0,0.0222282037225818,0,0.00175…
TCGA-AO-A0JG-01,0.171011525480085,0.247521663568312,0.433243062958872,0.163587261756724,0.0747749962998744,0.640708358554822,0.0664712809297917,0,0.0497244050046308,0.259003443028602,0,0.173967763465691,0,0.0755614943312223,0.0116753337499416,0.0142662824462061,0,0.0232955002246512,0.00676491526328162,0,0.0752263112591851,0.212033370250991,0.000787955707669391,0,0.0312219443381359,0,0,0,0.0455099…
TCGA-AO-A0JI-01,0.0653612486113916,0.0807615674474808,0.0218027894954613,0.00776491907161429,0,0.0686876678074115,0.0491707069702383,0,0.0693940631012833,0.0778295805087879,0,0.0955165668589189,0,0.00731623855928532,0.000461071933689144,0.0011845176872853,0,0.04118854751279,0,0,0.0366753212331683,0.0813913433991042,0,0,0.539872042235449,0,0,0,0.0114525495233809,0,0.016162853724619,0.0181276044231…
TCGA-AO-A0JJ-01,0.0952477800584981,0.244996734434272,0.338689354641167,0.217293414405167,0.212943522189026,0.714466657436197,0.00704690976816519,0.00901944853465578,0.109585419130605,0.11772447083942,0,0.2347553373019,0,0.0281198432777152,0.00437283205064317,0,0,0.0363585057002021,0.0506674185588819,0,0.0558868904863271,0.261409964540436,0.008246106900453,0,0.0768068529105959,0,0,0,0.004897020776…
TCGA-AO-A0JL-01,0,0,0,0.0173224490800524,0,0,0.064425588192706,0,0.0929874262503782,0.0618544876890848,0,0.048399254217929,0,0.0617807890977876,0.0364435225576778,0,0,0.0401918521284165,0,0.278081853090435,0.0330253804032369,0.257849911369999,0,0,0.0249599350023496,0,0,0,0.00850430301638189,0,0.0122745212225507,0.00816491274643256,0,0.00638879574378131,0,0.00815518438896073,0.004810615898264,0,0,…
TCGA-AO-A0JM-01,0.0273326608654047,0.0660943013965078,0.0660190392701358,0.0926086465510145,0,0.369134211200547,0.00392198582205079,0,0.0556044988603415,0,0,0.00407107595213223,0,0.0632452014950539,0.0619828958222617,0.0179950802505322,0.0298331087386093,0,0,0.407741278809261,0.0703144572755407,0.257206990049744,0,0,0.0280834269244729,0,0,0,0.00110229248370549,0,0.0156279048254986,0,0,0.001144194…
TCGA-AO-A124-01,0.0717358597927414,0.107086306082318,0.0348974983624242,0.15965994333443,0,0.302543490545185,0.118321038671502,0,0.0060163910709,0.120600228960942,0,0.00254608279859546,0,0.141102484735319,0,0.00223936310047073,0,0.0942143000413536,0,0.178213867935022,0.0155845797522781,0.162162091875076,0,0.0811523074705172,0,0.0761891987848575,0,0.0016580648031659,0.0380544213897226,0,0.00193499…
TCGA-AO-A125-01,0.0156807171439784,0.0422243946887717,0.0121049613983514,0,0,0,0.0260168146900101,0,0.00523022741181552,0.0184432598166045,0,0,0,0.202582378543254,0,0,0.00510313969653033,0.040148873539559,0.0115918519094831,0.103924529280396,0,0.458902943982692,0,0.0682415092519416,0,0.0586371300764556,0,0.00117734180125803,0.00203620574023349,0,0.000409343695819712,0.00144346154418388,0,0,0,0.01…
TCGA-AO-A126-01,0.072148465641318,0.0963539347882467,0.0552749843673762,0.0168016119858137,0.0241970113127752,0.266486601193201,0.015683556745539,0,0.0523445437335084,0.0842167313713963,0,0.082114694730135,0,0.104884886713121,0.0116205535297561,0.0437674399610807,0,0.0600552876815194,0,0,0.0431270740970034,0.340527811251301,0,0,0.16165742018564,0,0,0,0.00380576251880309,0,0.0127018957394023,0.020…
TCGA-AO-A128-01,0,0.408316406887763,0.61037625447546,0.826340547720708,0,1.64769115911948,0.0197775509474295,0,0,0.206655922612653,0,0.0605577838799215,0.034762733674207,0.0882408704328644,0.0197126704892285,0.00983645080268919,0,0.101933496260663,0.00327205382549204,0.0044070533533859,0.192455185371522,0.212707827270442,0.0118635826073729,0,0.0338168184721302,0,0,0,0.0252262849252229,0,0,0.26358…
TCGA-AO-A129-01,0.153783291684873,0.198628026702749,0.0998889584670404,0.183331187575199,0,0.494977014201606,0.0463269951052813,0.00813604106682598,0.080161604192183,0.126422911730697,0,0.128393392624659,0,0.115113882910653,0.027519165112447,0,0,0.0407190135312337,0.00591542273098891,0.0605398137216684,0.164470584241916,0.182494136586116,0,0,0.0137870364453305,0,0,0,0.0289092418660615,0.005077099…
TCGA-AO-A12A-01,0.14958474410377,0.166239695661081,0.157821806376539,0.109983310363912,0.00268875310156344,0.555267388378467,0.0908974666347705,0,0.0474799377657773,0.17443093764412,0,0.111814157758245,0,0.0782205746998896,0.0243143525627821,0,0,0.00517051261165,0.000117264384858145,0,0.121990399169471,0.29559725398965,0.0170316033712695,0,0.0329355394075167,0,0,0,0.0429691238191687,0,0.022444754…
TCGA-AO-A12B-01,0.0154797116193173,0,0.108718202048278,0,0,0.0927982576015676,0.0781921034183178,0,0.0493425124436232,0.0955741703726248,0,0.178169672673102,0,0.0373547120496747,0.0100248610144527,0.00873644739406366,0,2.7749865828983e-05,0.0238066168066826,0,0.0544091149940829,0.443854462137775,0,0,0.0183810515519119,0,0,0.00212652527785941,0.00945244666605543,0,0.00596489219310681,0.01155372101…
TCGA-AO-A12C-01,0.0217077023495877,0.0719961855042784,0.0137102320299742,0.0439191954848454,0.0551187972515316,0.182948088626462,0.0985389911057255,0,0.0923610461009755,0.028900045361884,0,0,0,0.014261908914838,0,0,0,0.003041862432661,0,0.303208697796275,0.033669994967745,0.340364209393483,0,0,0.085653243926413,0,0,0,0.0191106393437528,0,0.0179124894789481,0.00560487110464204,0,0,0,0.002765952792…
TCGA-AO-A12D-01,0.157641990447504,0.180008879463026,0.1454756884773,0.135745994437744,0.00139659395673375,0.520159772934528,0.0138334413846477,0,0.014645273080964,0.114454126368571,0,0.250530054170983,0.00916410666117424,0.0937659783171637,0.0232355004768074,0,0,0,0.0232855412547501,0.0103642693318207,0.100174974477489,0.313419007935091,0.000642077304974676,0.00187359131969104,0.0306120579158717,…
TCGA-AO-A12E-01,0.0582334079456611,0.126871639055822,0.0993726325744694,0.132382148939853,0.121432532335481,0.418142142912469,0,0.00346807171204025,0.034242818374235,0.076194873044866,0,0.0801198894118982,0,0.0122477824261907,0.00300318117684752,0,0.0144079272278063,0,0.0375548835575718,0,0.0323604189885839,0.478789786787968,0.000374433600480594,0,0.227235933691512,0,0,0,0,0.00121988037770459,0.0…
TCGA-AO-A12F-01,0,0.00557581829313481,0,0.111118444690037,0.0318171417464729,0.181911108372264,0.0677442276651869,0,0.102551981224946,0.0195711863558908,0,0.0743742846645398,0,0.0778755879648255,0,0,0,0.0316077559375036,0.0205375036155214,0.120280928040713,0,0.35471798506081,0,0.0352268748288622,0.0872123200998515,0.00470177917921894,0,0.00359758536213027,0.0128165243352753,0,0.0194018000986918,0…
TCGA-AO-A12G-01,0.0456141348584344,0.0493580154914915,0.0496728040161041,0,0,0.183061928146399,0.054143619406268,0,0.0581388315179726,0.0957045204324455,0,0.145151052789785,0,0.035269380289795,0.0240246308480185,0,0,0.0278350727686615,0.00428436303982971,0,0.114160799912243,0.3226189129074,0.0136353810783732,0,0.105033435009208,0,0,0,0.0119253147332411,0,0.0128052736717198,0.0210792433174257,0,0.…
TCGA-AO-A12H-01,0.0259275583125708,0.0450796096728839,0.00221719348624545,0.0165848420148318,0,0.153563988797615,0.022779156919572,0,0.0209214708164819,0.0373671910697617,0,0.0260601289857474,0,0.0245351915200141,0.00162425795044182,0,0,0.0270850481789622,0,0.00951533723552054,0.00831600898149478,0.684847378127631,0,0,0.132565847888181,0,0,0.00438298232619172,0.00331392444430984,0,0.0030436672346…
TCGA-AO-A1KO-01,0.0168142967380026,0.0312761713677537,0.171669929593035,0.0857366128230674,0.0600651015778461,0.175545458101134,0.037765882597252,0,0.21030209206898,0.105254442385977,0,0.286289590009576,0,0,0,0,0,0.0159286821072658,0.00616413825729781,0.00906977751933057,0.00216464949429373,0.275993624544829,0,0.0314894388916963,0,0.0195776821235016,0,0,0.00895548015982462,0,0.0498692492686613,0.…
TCGA-AO-A1KP-01,0.037089653614253,0,0.0121869654015731,0.0114919543424654,0,0.00520130175595816,0.125275531655737,0,0.050863092145453,0.0174541263949166,0,0.151440020654217,0,0.126084928090848,0.0332346333622478,0.0715274602184454,0,0.00458240028341394,0,0.0610658774378531,0.0182441212410429,0.177927241114987,0,0.0875017986380337,0.0525447241434701,0.00667213085847978,0.0155819137608548,0,0.01327…
TCGA-AO-A1KQ-01,0.00825300906603238,0.0290845119441665,0.243942830125996,0.0734036778758353,0,0.25857840013178,0.0096213812101631,0.0151141417064422,0,0.253999615407532,0,0,0,0.108614145215749,0.00616967726952867,0.0888257453026102,0,0.0420717576632077,0,0.147364897059149,0.111288981340678,0.175158894281197,0.00704487735761517,0,0,0.0347258861861278,0,0,0.00374677855587344,0.00588578092886623,0,0…
TCGA-AO-A1KR-01,0,0.0743741040845451,0.0169770733810279,0.0323743558250485,0,0,0.0406501786854346,0,0.0866944880277024,0.2436154039363,0,0,0.0145095035455717,0.222556561103242,0.0207514130732538,0,0,0.0921214631496823,0.0116500629368302,0,0.118056888112124,0.0964713403557582,0,0.0497392648618978,0.00318343221220285,0,0,0,0.00564866722265561,0,0.0120468920123704,0.0338523074596486,0,0,0.0020162114…
TCGA-AO-A1KS-01,0.0352234380198839,0.102815762885712,0.17531122843868,0.087818676519671,0.17813152791117,0.274947443643367,0.0727579090483505,0,0.0362169738846702,0.0340657591665529,0,0.197107175272525,0,0.0288606508690888,0,0.048456557644325,0,0.00691504517284648,0.0117553071816299,0.0441351568572892,0.0723657158577497,0.370492887398964,0.0094649700328054,0.00622336360728718,0.0601783897712538,0…
TCGA-AO-A1KT-01,0,0.0107722769200858,0.00698858120509023,0.109784950567299,0.112700902908269,0.293130103057959,0.00108355979241672,0,0.0317942047408331,0.0357869257692677,0,0.125042343750163,0,0.0441783550846749,0,0,0,0.00482791722017067,0.0176000137548653,0.0712928042589098,0.0211910800515632,0.511270266344809,0,0.0456011791275872,0.0111365177822627,0.0689878107335315,0,0.0102070215889452,0.0002…
TCGA-AQ-A04H-01,0,0.0832845953971494,0.0573902947863148,0.0720359235099482,0.162145157603365,0.200912967321845,0.0769385158820803,0,0.0529296067807727,0.0642179967688659,0,0.10975478267295,0.00505670772445547,0.0223410647600307,0.0142214959938911,0,0,0.00483300799255387,0,0.204693695589246,0.0780012249209115,0.304329408093,0,0,0.0593737772643378,0.00330871555690485,0,0,0.0201561075688133,0,0.0138…
TCGA-AQ-A04J-01,0.277351862263672,0.370294861718723,0.191881004648044,0.212058462680429,0.0537947094898812,0.665095463386363,0.181800384249216,0,0.0602117312656641,0.112918057943205,0,0.186008767010125,0,0.0448566179514897,0.0469124410882342,0.02198235452417,0,0,0.0105473431188047,0.076606179627587,0.0775533807486973,0.132281846111212,0.018662554705848,0.00980431333755896,0.0198540283181885,0,0,0…
TCGA-AQ-A04L-01,0.0352627528468289,0.0236650849394984,0.045786550272447,0,0.0534607204282868,0.356282133587517,0.0456393281448076,0,0.00543538874630241,0.0215551859570377,0,0.0499692723813339,0,0.0755472740291141,0,0,0,0.00398447194975825,0,0.316559366004699,0.0344105559256365,0.432824148032652,0,0,0,0.0140750088286586,0,0,0.00676360514688931,0,0.00080550754785854,0.0031944108865626,0,0.007405289…
TCGA-AQ-A0Y5-01,0,0.0380862015514825,0.107125437690632,0.0785374144276232,0.111515315340966,0.37772008567767,0.00212474941570639,0.000334675995044838,0.0124831479641939,0,0,0.103621663373708,0,0.0274883854615765,0.0219125065613565,0,0.0258350956506733,0.0219030270763192,0,0.358607002739658,0.00156087181368855,0.344600621221407,0,0,0.0743356932244831,0,0,0.00519255950218499,0.000422983387915898,6.…
TCGA-AQ-A1H2-01,0.045547878758972,0.0656094544977034,0.0758248933215816,0.0491421064117073,0.0324003365924876,0.23327782292481,0.00167119671540487,0,0,0.0837463041487832,0,0.11794132861958,0,0.0151602467218066,0.0212769897999592,0,0,0.00311097889527209,0.00560020245256672,0,0.0515426099373305,0.546142839362371,0,0,0.153807303346926,0,0,0,0.000359368832083855,0,0,0.0180085391718811,0,0.02536172859…
TCGA-AQ-A1H3-01,0.0330510094602644,0.180904620835645,0.190983353422501,0.137662118226448,0.0143095634146652,0.471422988149491,0.0691585354495811,0,0.0512943302195859,0.0600820584581626,0,0.19797993594845,0,0.0646544190749785,0,0.0746881554927626,0,0,0.000971939388015087,0,0.093162038228555,0.251968396372593,0.082130616533185,0,0.0308013587440509,0.0231082160900808,0,0,0.0378036449789809,0,0.02803…
TCGA-AQ-A54N-01,0.0014090428416002,0,0,0.000952146471851784,0,0.0758040073776306,0,0.0721456966577878,0.00496757544264267,0.0611253129448081,0,0.0149699900466577,0,0.414200187183611,0.00392849937381144,0,0,0.0126203264561622,0.00933678929939363,0.0474010469707769,0.0744828975668025,0.133921170189863,0,0.026749685599951,0.124150822267733,0,0,0,0,0.0078420955522625,0.000539965695654162,0.0066442014…
TCGA-AQ-A54O-01,0.0703831129671171,0.0740793056769183,0,0.000669826730622468,0,0.210090183842265,0.0261025486076962,0.0103618717758427,0,0.0841972881955775,0,0.0284486136850566,0,0.14600799837675,0.0396164412524552,0.0194713328726345,0,0.0190735927225622,0,0.279337653470771,0.0540351542347085,0.279508341522725,7.48927010917735e-05,0,0.013764270582129,0,0,0,0.00619629530671064,0.00245972983015385,…
TCGA-AQ-A7U7-01,0.301395070854005,0.692958830239972,0.612320715627291,0.463851100938738,0.11002786341262,1.42971007070501,0.0255365944849098,0.0361907738673529,0,0.182335583157966,0,0.233077066283413,0,0.0721839072783176,0.0470214717981596,0.0135150231182916,0,0.0405905520185026,0.018095121643427,0.00326309001153669,0.117467652839367,0.158940835433567,0.00811066988845307,0,0.0436716581767366,0,0,…
TCGA-AR-A0TP-01,0.135256428822501,0.0577873646282966,0.00730861254731172,0.0644715191944946,0,0.334669516760717,0,0,0.0423371095767637,0.0188126115578153,0,0.0165874246333293,0,0.039648164599789,0.0252766709939821,0,0.0399315335872077,0,0,0.608546776754031,0,0.170128980980007,0,0,0.0267417147319968,0,0.0119890125850774,0,0,0,0.00518439616697638,0.00230370075392871,0,0.00203121520455048,0,0.004855…
TCGA-AR-A0TQ-01,0.0683408825697614,0.216726130741435,0.213103375844718,0.121592042274404,0.0181149101910718,0.503898171180161,0.0345891006631794,0,0.0669850647581576,0.136929750715285,0,0.115832095308203,0,0.0466131137285449,0.0412851862460781,0.0132150623700138,0,0.0191599164418011,0.0110111499375748,0.171434914355903,0.0629263346416558,0.269916319360551,0,0,0.00845109556702883,0.001650895906023…
TCGA-AR-A0TR-01,0.0805641306340363,0.138870975539993,0.0259629334942019,0.0144709195868896,0,0.0929627486438545,0.111214833999534,0.013865383344266,0.0721889342136438,0.0934146834307997,0,0.0885544383119046,0,0.0519077757406658,0.0567690626450368,0,0,0.0567171967928244,0.000332641069144418,0,0.047741221338961,0.290214523472887,0,0.0019485190668401,0.112948096389688,0,0,0.00218269018380459,0.03214…
TCGA-AR-A0TS-01,0.543576641362358,0.953530146961857,0.271667590692634,0.35101515674065,0.176092511076637,1.15564415958936,0.204953664469676,0.0315384136049892,0,0.126213699294837,0.00418166147275238,0.0913727352512711,0.0157192961206979,0.0494792514546104,0.0638553021353069,0,0.00316204294908896,0,0.0189082824530159,0.0514023840546119,0.0885944563095503,0.247596147992358,0,0,0.00302266243723389,0…
TCGA-AR-A0TT-01,0.388613033376525,0.549516642658379,0.295341898786634,0.39283909319013,0.194633506985295,1.42875146340575,0.0459445266727009,0.00823132276313242,0,0.11978939053966,0,0.224748290114468,0.00294541980904555,0.0493588037420915,0.0638727936882282,0,0,0,0.00338790121707833,0.107549214165577,0.12470684103381,0.206901034767782,0.0127833965286016,0,0.0280130587330758,0,0,0.0017680062247499…
TCGA-AR-A0TU-01,0,0.0649780168964665,0,0.217276516134837,0,0.275423042078304,0,0.00890112532524043,0.0240019544310903,0.124168558827491,0,0,0.122669164475644,0.0846370084218517,0.000910639925587533,0.0291965173889636,0,0.0682938637827708,0.00619078547835394,0.0337064289755604,0.122552111033445,0.315827707705208,0.00883696168394084,0.0423192245179319,0,0.00778794802692099,0,0,0,0.00342069582508224…
TCGA-AR-A0TV-01,0.0370926215472396,0.12957489869957,0.0852555064301294,0.112863013688341,0,0.431451641356459,0.00956080208607498,2.35662659798903e-05,0.00983321367885968,0.12518720574605,0,0.134848474194491,0,0.0624207190963305,0.0404555138636547,0,0,0.0347571194219359,0.0110500220092891,0.177736410849559,0.136961972951941,0.229333454694697,0.00510269511171329,0,0.0227288300294239,0,0,0,0.0043068…
TCGA-AR-A0TW-01,0.0979113886768545,0.0494128147836253,0.229138375763682,0.100476253085267,0.0481914785434398,0.473364216222725,0.0147658181570621,0,0.0833424191005043,0.229803443481043,0,0.0547721126158399,0.0589652417671311,0.072971865955085,0,0,0,0.0425371447501387,0.0158957314962204,0,0.105714701016665,0.287341023577654,0.00328650897054278,0,0.0306039891121141,0,0,0,0.0063077761495772,0,0.0356…
TCGA-AR-A0TX-01,0.221958750864981,0.255651515976421,0.376616624371002,0.222399707473522,0.165309954546754,0.897253472021657,0.0200673020962955,0.00362054948050448,0.032148769360071,0.128734863401787,0,0.2075727140238,0,0.07186220970012,0.0168008094504518,0,0,0.0329131212452847,0.00353063838051911,0.0341812561824649,0.0838827226669578,0.277514737070292,0.0270157881771644,0.00121604601525338,0.0589…
TCGA-AR-A0TY-01,0.0791231750982369,0.0829196407493231,0.0298442740006794,0.00340683281580423,0,0.198143716979089,0.0147274949674643,0.0140437676118323,0.0729392228960277,0.0660441474740861,0,0.0890583348173977,0,0.0375255308479824,0.0269102320383425,0,0,0,0.00310936956399307,0.270070090706789,0.0203435190821604,0.321870342093618,0,0,0.0497524593164954,0.0136054885838109,0,0,0.00281960951654209,0.…
TCGA-AR-A0TZ-01,0.0652365594297085,0.0690588433392775,0.0599060383731951,0.113154161692065,0,0.298971088456196,0.0313311776847902,0,0,0.0534620996178401,0,0.128626874679006,0,0.0467433743155027,0.00453372701520743,0,0,0.0237999912355462,0.0498437428775153,0,0.039343926238569,0.412105288043405,0.0907298659841249,0,0,0.119479932308494,0,0,0.00692266976883399,0,0,0.0118125295041967,0,0.0284202970522…
TCGA-AR-A0U0-01,0.0445436065451083,0.20917810009107,0.163456311957156,0.362275742619266,0,0.762336835568891,0.015272496909871,0,0.0862656336487286,0.126639458534053,0,0.11022293096953,0.0167892478704251,0.100364338262054,0,0.0236853083909537,0.00435408178243841,0.0190126788199377,0,0.0556932976130979,0.197668039755502,0.229255769130401,0.00833247773869279,0,0.00644424057431546,0,0,0,0.00997752606…
TCGA-AR-A0U2-01,0.144848555775207,0.0828444550472648,0.286550929221308,0.093832567246655,0.166915895473334,0.510320683445382,0.0564043646121143,0,0.0572310562144607,0.140903294586369,0,0.146777019890885,0.028983931033733,0.014857880662391,0.0110278912083076,0,0.0304079593566925,0,0.0208773132094554,0.0794075885780928,0.0793683999182108,0.307356080644321,0.00494496426075337,0,0.021452255824213,0,0…
TCGA-AR-A0U3-01,0.125451233899134,0.0935212031823387,0.0586884704939203,0.0544155726830484,0,0.290489995302834,0.0314218011352583,0,0.00996279766294314,0.0508645066609977,0,0.093128788279553,0,0.0942436144432434,0.0505970886480424,0,0.000681930696124128,0.00525795024282829,0.00998042366909713,0.193562132519292,0.0933776009605103,0.306724512406696,0.0105208513348702,0,0.0496760013405445,0,0,0,0.01…
TCGA-AR-A0U4-01,0,0.0871205163198479,0,0.977748708375756,0,1.17165194769989,0,0.0474701070282424,0,0.0346469972266815,0,0.0629828398153937,0.00182484691144477,0.0388375420506014,0.0212366006935296,0,0.0517134579400383,0,0.035878164972298,0.401942735327681,0.118995760661173,0.138499415634184,0.0234554656169981,0,0,0.0132401136279459,0,0.0092759524937892,0,0.0325939523102281,0,0.0237893412506357,0,…
TCGA-AR-A1AH-01,0,0.0440871724978991,0.0395746810305072,0.10057818466848,0.110026869004052,0.169527030296072,0.0371331227884987,0,0.142295541748481,0.0222592306788089,0,0.0219536114450257,0,0.0479527485566349,0.0114446365861625,0.00291874586971932,0,0,0.0319183065767985,0.193526396629787,0.0181723010426214,0.335884279706524,0,0.0332048209503277,0,0.0960351214523837,0,0.00530113596822676,0.0053317…
TCGA-AR-A1AI-01,0.149815935974194,0.21150726845316,0.296232832694111,0.351652574388543,0,0.942543459528784,0.0182793321770643,0,0.132825863389623,0.145032271627091,0,0.117670073880809,0.0273798649295004,0.0793429608448945,0.00449668940497715,0,0,0.0381158745803344,0.0274919775089289,0.0605781128824823,0.092410208227007,0.210121943060625,0.00645869267319971,0.0380386469279085,0.00175748788555484,0…
TCGA-AR-A1AJ-01,0,0.586849250021456,0.317459482507801,0.559047708994373,0.206634362291373,1.63809438765669,0.0313591827627567,0.00177982623777502,0.0177057485481016,0.0593794586803212,0,0.171011310427015,0.021137353178705,0.0950747334717607,0.005733934319573,0.0527379886616281,0,0,0.00169814077429743,0.00603200235019052,0.173554393305533,0.328803220680339,0.025161436719206,0,0,0.0072707853664065,…
TCGA-AR-A1AK-01,0.0615468842759332,0.254944500542063,0.33422439409632,0.289297431283411,0.192369014462513,0.921115667841085,0.0160742937838836,0,0.0615926186873186,0.140729785376235,0,0.0858784216238177,0,0.070840575460677,0.0111241580087859,0.0158324799322939,0,0.0170356458287004,0.00246119772789405,0,0.152466796063579,0.376421903653073,0.0164104139534102,0,0.0331317099003313,0,0,0,0.01340090260…
TCGA-AR-A1AL-01,0.0726023966910101,0.220915247312178,0.260256872420212,0.199989058088861,0.0884464007175577,0.622376210827053,0.0857664210183214,0,0.0572248688833292,0.072293731979364,0,0.190626081809875,0.0107108010292126,0.00286811541282135,0,0.0219796598238885,0,0,0.018771287999834,0,0.0166847661910442,0.257930189880843,0.147661401344087,0,0.110665224335353,0.00681745029202717,0,0,0.0473611307…
TCGA-AR-A1AM-01,0.0954886789063,0.194923031961593,0.139447055006396,0.109509431480889,0.114692779536045,0.491967568729239,0.039704534173035,0,0.109968641550733,0.132713867520851,0,0.151829106200395,0,0.0270866258839638,0.0179510585911616,0,0,0.0142003445546597,0.0139492268989361,0.0407918924783717,0.047425294246111,0.302388385014452,0.00234073394511521,0,0.0996502889422131,0,0,0,0.020282197797751…
TCGA-AR-A1AN-01,0.023457074880229,0.146247758604095,0.0315813486301612,0.0757019231648973,0.0184612429444336,0.375805849872871,0.0126949602240009,0.00480729429734395,0,0.0425013037686702,0,0,0,0.0474551098707429,0.0279553460290032,0.0264757512230058,0,0.0105869727154357,0,0.440748561294772,0.0586502717009141,0.270253305103353,0.00594215270007427,0,0.0394058449686299,0.0125231261040538,0,0,0.00386…
TCGA-AR-A1AO-01,0,0.267848703590688,0.49572394526954,0.467737495204447,0.616380667523064,1.68056234048454,0.00378346785484495,0.00397776755246863,0,0.0522412957084822,0,0.106271529034406,0,0.0123565162425731,0.00123811553343025,0,0,0,0,0.52197161876369,0.04491746838386,0.220428250742837,0.00222133576599168,0,0.0305926344174161,0,0,0,0.00393800736333406,0.00414024342540495,0,0.0543751434036026,0,0…
TCGA-AR-A1AP-01,0.183197523659463,0.151735051266327,0.141844780256768,0.110992671311353,0.0703774620824466,0.571894824975003,0.0581953448786762,0,0.00701318451707671,0.0438548919804272,0,0.108599189380271,0,0.0683112723587112,0.0370953502109348,0,0,0.0115948927237087,0.0382818341737395,0.0181407095447328,0.144617108413959,0.416801027446039,0.0220507501714289,0,0.0244442697043053,0,0,0.00100017449…
TCGA-AR-A1AQ-01,0.0702174073722193,0.20043168680794,0.210858367793485,0.264991141912657,0.0122305779297227,0.754338340545549,0.0170271107005264,1.79119530100668e-05,0.124125381480609,0.104713017901708,0,0.130070022334297,0.0277765442331262,0.0913443228761383,0,0.0127319366461595,0,0.0178543560567703,0.000735384554039002,0.0626439100281142,0.114148668961437,0.237230354335631,0.0474018196859969,0,0…
TCGA-AR-A1AR-01,0.0236815810417196,0.215286164396142,0.355307828971137,0.311578748996318,0.400797147888433,1.26347324652116,0,0.0411789959650003,0,0,0,0.184479672219846,0.0133310464590092,0.0182861812063741,0.00347994335475591,0.0563929540546848,0.028634418908588,0,0.00383635096500376,0.218569651416427,0.086937661084243,0.336382208251989,0,0,0.00849091611407897,0,0,0,0,0.0338332198451903,0,0,0,0.…
TCGA-AR-A1AS-01,0.0320287472559543,0.0436353057738875,0.034263730575983,0.04385645384622,0.0142824965751236,0.267923583292946,0.000784021842350523,0.00761429741354079,0.00693385025193792,0,0.0472920314314723,0,0,0.0377619402630016,0.0255722839053726,0,0.0376528703206274,0,0,0.399076578535395,0,0.383629424819779,0,0,0,0.0536191649073583,0,6.35363091644945e-05,8.14047069680809e-05,0.000790589772166…
TCGA-AR-A1AT-01,0.108973715990158,0.161032736828705,0.290058759735178,0.166162505032553,0.0967985263424737,0.53648003220356,0.0276348123556234,0,0.00152469428062478,0.165506255885156,0,0.168268249703062,9.39692975313026e-05,0.0682889121945194,0.00433104725187552,0.0561775638975206,0,0.00967640955224474,0,0.0830499078462295,0.11979639582889,0.282224684711299,0.00332958561910822,0,0.010097511576314…
TCGA-AR-A1AU-01,0.0335764650617617,0.0983511864441086,0.111635941001393,0.074302980603838,0.0193436895595328,0.388734878681626,0.0861954445142947,0,0.0841619444865273,0.0861266759800473,0,0.130450152504055,0,0.0139120944237255,0,0,0,0.0453270266436083,0.0186097646859617,0.0303654966145605,0.0314958943030623,0.369280082506447,0,0,0.0568651588819748,0.0434919877286684,0,0.00371827672706788,0.027030…
TCGA-AR-A1AV-01,0.0895831145219252,0.128193918961558,0.0416617345616562,0.071347138583094,0.0383429101704426,0.402797327956593,0.0479638256826126,0,0.0228164393843731,0.0177016563805646,0,0.018580163676221,0,0.0499139434383471,0,0,0,0.00301825443598299,0,0.228323427272476,0.0377578586859368,0.503961318601217,0.0060795444263868,0,0.0636221119381554,0,0,0.00026145607772664,0.0100220739205646,0,0.00…
TCGA-AR-A1AW-01,0.74729239176182,0.776961665962543,0.766378385423618,0.604183353559091,0.062197381920302,1.88568219362438,0.058491797675419,0.0485868126453605,0.0502226287953679,0.115447289990167,0,0.131149949556102,0.0399839138329654,0.0329960920338802,0.0224224659469958,0.044674821906716,0,0,0,0.152085814917487,0.0973954802717977,0.206542932427741,0,0,0,0,0,0,0.0894616880478716,0.07431227024753…
TCGA-AR-A1AX-01,0.382808311994569,0.631443495442429,0.347263282494345,0.313842784437942,0.0464336637088123,0.945470227404374,0.0802835786303644,0.0141493383159354,0,0.128399309043472,0,0.190337191097561,0.0214453381344936,0.0576805767940035,0.0590674531671811,0,0,0.0232999327528161,0.0285734528457834,0.0200670083412578,0.101627642461532,0.112258276950758,0.00628678767102398,0,0.156524113793818,0,…
TCGA-AR-A1AY-01,0.0425029630167584,0.197382981273006,0,0.151339428121536,0.0410484344888406,0.469649103923082,0.000104795958060439,0.00211220038904918,0,0.0395385604649403,0,0.0564725245672544,0,0.0333603547649314,0.0148979492095934,0,0,0.0658572565829698,0,0.556368103209205,0.0474406705083447,0.141044694310471,0,0,0.0412166837778041,0,0,0.00158620625737713,2.70233257881492e-05,0.0005446648926117…
TCGA-AR-A24H-01,0.0218592764883181,0.128061034060034,0.134856982680195,0.130225191789243,0.0894271692884266,0.383866667364186,0.0327627987141399,0,0.0250681563655503,0.138957349890784,0,0.028133832174257,0.00718352202708092,0.13981513531794,0.0216277152602207,0.0269255154817043,0,0.00112129523505217,0.00410008285321241,0.0518913319781771,0.131329178873177,0.372722916428569,0.0124006972495127,0,0.…
TCGA-AR-A24K-01,0.0672550296524493,0.0458939512939491,0,0,0,0.052284507693152,0.0941413582462805,0,0.0961764180037298,0.0575278681071925,0,0.0948860625774503,0,0.0574996876815226,0,0,0,0.0153348739116865,0.0525804702364172,0,0.0305800184390544,0.4055997029273,0.0127061027213286,0.0229032571737365,0,0.0600641799743015,0,0,0.0101377568386978,0,0.010356905376148,0.00619497688564994,0,0.0102179514690…
TCGA-AR-A24L-01,0.0194772599076675,0.0886387140341706,0.128486239960139,0.144724659989711,0.223103548854042,0.287020678169469,0.0955828889956421,0,0.112054568020692,0.056084148237678,0,0.0783896134541818,0,0.0167046953202655,0.00463527687605622,0.00485823102545617,0,0.00736511254627403,0.00689752841916959,0.11049102204284,0.0413237396593338,0.391545615822833,0.00776298010752386,0,0.06447003773453…
TCGA-AR-A24M-01,0.106020370419996,0.0986162814531899,0.158730158837974,0.132479182439963,0.162657049314186,0.385274646813667,0.00090838754187382,0.0024464554019566,0.0371103568628706,0.0485453384213757,0,0.145497720235262,0,0.0252879504115315,0.0216815725607868,0,0,0,0.0106436213522828,0.0971921725285491,0.0175073790881868,0.334421056929156,0,0,0.258757988666168,0,0,0,0.000220731000214006,0.00059…
TCGA-AR-A24N-01,0.0574206423972472,0.102649977147798,0.0363809791073945,0.0710259519250506,0,0.233720566429716,0.0782902318695579,0,0.19217685199866,0.0635821684581373,0,0.137314176057896,0,0.090891675553125,0,0,0.00244825982859594,0.00746511967739667,0.0287199663594935,0,0.050557832571522,0.318110652299167,0,0.00972142174875422,0.0207216435776939,0,0,0,0.0207128157732463,0,0.050843172082601,0.01…
TCGA-AR-A24O-01,0.106778566784402,0.16207608507274,0.334978040372968,0.234436909193505,0.188198637006524,0.678602487748674,0.0766298607507451,0,0.0311903504097688,0.0861988477108874,0,0.208241665318847,0,0.029325108949313,0,0.0387625725558295,0,0.00175789839140938,0.0380005861136496,0,0.0901800296523978,0.280796090994091,0.00166851657995811,0,0.117248472573103,0,0,0,0.0484680969506773,0,0.0197277…
TCGA-AR-A24P-01,0.080506083379237,0.151197125404232,0.104673075548965,0.121869340697461,0.0653574847325174,0.402749118552781,0.0773670785954106,0,0.0533512534941262,0.0367501072777232,0,0.158757401777132,0,0.0520977821698788,0,0,0.0118375196151473,0,0.10529345722868,0,0.0528573382409104,0.390837443615335,0.00583219928427346,0,0.0550184187013831,0,0,0,0.0295346128870801,0,0.0203666552698678,0.0140…
TCGA-AR-A24Q-01,0.179206542444579,0.11207487454659,0.249082777557753,0.171489881830931,0,0.704516608281097,0.00629818478224671,0,0.102349749750741,0.138863639217804,0,0.156968620186267,0,0.0338912571962349,0.00273250931048332,0.0393846791424341,0,0.0144394721430163,0,0.221269023934818,0.0847019990914295,0.154527098840135,0.00779540945149295,0,0.0367783569528963,0,0,0,0.00340968852393452,0,0.05540…
TCGA-AR-A24R-01,0.0583997435733715,0.128130452509332,0.135083495168168,0.0822162427984439,0,0.437432689375105,0.0587273509822432,0,0.020379963027867,0.0848374384179888,0,0.108556845091007,0.0121771371841522,0.0742924381727778,0.00852619879114004,0.0245942461057186,0,0,0.00683004956387046,0.0586502180884082,0.117554125323052,0.361381784423547,0.0137414296320175,0,0.0497507751962097,0,0,0,0.0266116…
TCGA-AR-A24S-01,0.00556582055147171,0.246760687982127,0.163707983876025,0.276430029689902,0.374905113007815,0.980274396613394,0.0169417158121113,0,0,0.0197572267554752,0,0.135911914589865,0,0.0253482490536528,0.0176586255400915,0,0.00151247170249521,0,0.00774549767879595,0.143071865665181,0.0773677721253992,0.366353339090964,0.122559907374654,0,0.0560092596406378,0,0,0.00976215497067695,0.0100751…
TCGA-AR-A24T-01,0.0345561045409144,0.125517601844543,0.197714314083416,0.183723245336633,0.346282724849771,0.435460489241432,0.0152876149292447,0,0.0571920211755935,0.0513451633008816,0,0.0861388443487059,0,0.0124640385984204,0,0.0114879680861391,0,0.00669976498249223,0.04508349038402,0,0.0452515441132919,0.433573154199467,0,0,0.235476395881743,0,0,0,0.00621709664173463,0,0.0232585870608637,0.020…
TCGA-AR-A24U-01,0.0944297457598358,0.284756934357113,0.306615859250626,0.312334981724336,0.171101893208091,0.888850539216544,0.0309436532869595,0.0111156164444014,0.0557771432954523,0.048086516226724,0,0.238532015582584,0.0354602720362511,0.0325382815073355,0.00662750725548811,0,0.0216464672954346,0,0.00555688072478682,0.105760952947616,0.0698514225751529,0.271339705143758,0.0360372110733667,0,0.…
TCGA-AR-A24V-01,0,0.0459467471841965,0.123179728172303,0.228107478665605,0.260075108007776,0.571616036222526,0.0146005676909091,0,0.0128899472323466,0.033217493720906,0,0.0991109719387057,0,0.0216226494169786,0.00556725471044101,0,0.0118218674726362,0,0,0.126229275207992,0.0282715212864312,0.524122381863495,0,0,0.107800665391527,0,0,0.0147454040676312,0.0053055018109077,0,0.00468390269689996,0.01…
TCGA-AR-A24W-01,0.00470563538111558,0.0906802372033461,0.175620740133998,0.140828256586666,0.00634055187881698,0.39951276600988,0.07061913256441,0,0.148569034892472,0.0604006957245321,0,0.13828423850003,0,0.0121219405545728,0,0,0,0.00738954881053492,0,0,0,0.278662141694492,0,0.0265746203013522,0.197906370065757,0.0553386401229973,0,0.00413363676884902,0.021947625170879,0,0.0461735704108966,0.0187…
TCGA-AR-A24X-01,0.0683866676888808,0.135584550230196,0.13389782007549,0.108837312326199,0,0.29597849349207,0.103612650099785,0,0.0548476520685703,0.1004953654592,0,0.177503547317409,0,0.0921225176669091,0,0.0378155710565033,0,0.0631943839864013,0.0110463164778978,0,0.0663815040508706,0.236397483809724,0,0,0,0.0533520120988373,0,0.00323099590789279,0.0353872036546365,0,0.0187323172591372,0.0343225…
TCGA-AR-A24Z-01,0.0205235490716714,0.0498131278273261,0.0657561322091287,0.135589984799545,0.12025449396784,0.285375233484539,0.0533586479443437,0,0.00855948035458525,0.027767503662255,0,0.0600786673837657,0,0.0445665745296428,0.0012715175074759,0,0.0101780636102651,0,0,0.285892876301568,0.0234901073681603,0.482072433760386,0,0,0.00276412757755211,0,0,0,0.0145433066183627,0,0.00233295167861879,0.…
TCGA-AR-A250-01,0.0727011172500919,0.126695560368418,0.0884276966933573,0.166254552732913,0.132832670741551,0.610554768333928,0.00772717173403782,0,0.0332250557555684,0,0,0.166239721984643,0,0.0373466803059376,0.0376852715494016,0,0,0.0275604352296661,0,0.184164036349147,0.0951916089474583,0.311979989031323,0.00440850455164588,0,0.0944715245611707,0,0,0,0.00356673987908349,0,0.0153361586136554,0,…
TCGA-AR-A251-01,0.101337762376278,0.150220771231747,0.225506955770915,0.23065813736287,0.164825089615299,0.5979458463289,0.0946178386536379,0,0.0686515292538543,0.0501339235429504,0,0.160036283561004,0.0014896575278448,0.0295233139637022,0,0.0154558273532987,0,0,0.0102780586827529,0.0746010262331959,0.134566955131335,0.320388876520504,0,0.0183480267670027,0,0.0215297537480913,0,0.0003789290608258…
TCGA-AR-A252-01,0.237549937900337,0.402759483968238,0.966827799058596,0.386592476656897,0.156130420851734,1.3833448941585,0.0345221632786127,0,0.0502702448593825,0.163184997550979,0,0.195200328500284,0.0259413766177475,0.0204438625943267,0,0.141720282655511,0,0,0.00990787717832166,0,0.089727624564468,0.221422548429589,0.0164571950988254,0,0.031201498671954,0,0,0,0.0405599281602288,0,0.05906227554…
TCGA-AR-A254-01,0,0.149706642232452,0.131470985391402,0.208976829673841,0.218218026392516,0.624808732161608,0.00705014906839169,0,0,0.0843756545709453,0,0.174823354088825,0.00677307966973269,0.0485315953940178,0,0,0.0128096416802473,0,0.0051310751752447,0.023580296580638,0.116964608023587,0.509845437167329,0.00612188255362147,0,0,0.00073062901881477,0,0.00326259700860518,0.00420750337877214,0,0,0…
TCGA-AR-A255-01,0.0594202715618073,0.200532375513364,0.192182607351077,0.180245290619026,0.125405652984684,0.601425384489411,0.0230975555268349,0,0,0.074251942942328,0,0.0439161361457198,0.00321306310651292,0.0407990592137029,0.0199181659654128,0.0433388186596193,0,0,0.00465248727434104,0.0214698902091486,0.184365336196772,0.382259290574347,0.0281163543177914,0,0.130601899867469,0,0,0,0.014200009…
TCGA-AR-A256-01,0.0848344864536473,0.107332200762199,0.104264104098838,0.23675547085014,0,0.630448119258722,0.0308982000784813,0,0.00118325586559346,0.00858549426668137,0,0.0965319115938371,0,0.0854720839535553,0.0140858388536938,0,0.0179970828566235,0,0.000238544758323922,0.25085239664611,0.0480440700645341,0.287873246464086,0.0406911193608319,0.0665078834803217,0,0.0510388717573269,0,0,0.010362…
TCGA-AR-A2LE-01,0.0494295413140602,0.0285261069903842,0.143200598415533,0.00814845669104777,0,0.311334370888474,0.0925834640062623,0,0.0758572114000899,0.0681672796166777,0,0.188320635194775,0,0.00502486010225917,0,0.0153536081163848,0,0.00891464848524365,0.00346753096153582,0,0.107563581772316,0.2605436253555,0.1005860678927,0,0.0736174870962549,0,0,0,0.0187382973425425,0,0.0153530114480794,0.01…
TCGA-AR-A2LH-01,0.336589245591641,0.363731622815783,0.334858266584476,0.243109368568974,0.0428295581570238,1.05193897831693,0.0972998990719361,0,0,0.150345575923459,0,0.146747392356712,0.0145433874906558,0.0203959785202925,0.046780058005402,0,0,0.066283980359013,0.0662965863871326,0,0.075072142486269,0.224104681298465,0.00565373159585814,0,0.0864765865048047,0,0,0,0.0875547329706306,0,0,0.1352875…
TCGA-AR-A2LJ-01,0.0538957226886044,0.193272192945109,0.044666624924679,0.0619136894196514,0.157536390264073,0.712329209893431,0,0.0109073390704929,0,0.072117728483207,0,0.0877789754316105,0,0.0540215672876452,0.0266838122286834,0,0,0.0160822764537682,0.0372986394184456,0.28839320722374,0.0486926346181872,0.308618387919708,0,0,0.0494054318645117,0,0,0,0,0.0040354453952754,0,0.026681773936283,0,0.0…
TCGA-AR-A2LK-01,0.0383682598954714,0.107520401037605,0.0218717634296271,0.079502192630859,0.0970484135884223,0.389826743418658,0.00146325586460468,0.000753141866213015,0,0.0732585997255458,0,0.0718164819956077,0,0.0298678319761977,0.0290553674227712,0,0,0.0467863337531605,0.0374964878368988,0.0278297551098659,0.0271835557757053,0.485077759767421,0.00916218364810112,0,0.160249245257908,0,0,0,0.000…
TCGA-AR-A2LL-01,0.0228265141440883,0.12418203391238,0.0372893365261379,0.0559723698742287,0.171860081543758,0.489867544706055,0.0217593606123679,0.00323005760451079,0,0.060502732273497,0,0,0,0.0350415033857991,0.0420004053079644,0,0.00493722459115403,0,0.0160030866250868,0.0870176322479973,0.0182299956389183,0.525178024491562,0.0335554737689191,0,0.152544503452223,0,0,0,0.00688390374522485,0.0010…
TCGA-AR-A2LM-01,0.144862455152272,0.17735130676592,0.277777128639239,0.162491625707943,0.15987070753459,0.607203122735365,0.0548641603498303,0,0.0356286768489105,0.0900747739173908,0,0.181629718310129,0,0.0552209002583409,0,0.00318970965591452,0,0.0257564099977741,0.0240576846575541,0,0.0650831685008201,0.235378935052195,0.0213429673959563,0,0.207772895055185,0,0,0,0.0276915715665966,0,0.01798285…
TCGA-AR-A2LN-01,0.070239571281055,0.228423101870135,0.271378122523196,0.253465430427865,0.105336002696671,0.647638364492114,0.0626263726494369,0,0.0598695709836585,0.0831010140137637,0,0.107763557460321,0,0.0428138875531665,0,0,0,0.0548745780092325,0.0259468757548355,0,0.032358381987823,0.334935253879895,0,0,0.168614406876668,0.0239025989656043,0,0.00319350186559518,0.0407995504146668,0,0.0390035…
TCGA-AR-A2LO-01,0.0920598641528678,0.320055079866532,0.23731655116923,0.207427747067576,0.0264473917488845,0.651221560932845,0.0375764884624532,0.0114276500536604,0.042589085110264,0.17672095093193,0,0.182337840284866,0,0.0746164508511439,0.0706318417940546,0,0,0.0831061646272897,0.0261924047049571,0.0019092304084291,0.102844129935351,0.150168692977201,0.0111743709448674,0,0.0287046989135326,0,0,…
TCGA-AR-A2LQ-01,0.0653624870868176,0.181164350173048,0.209160717226472,0.162822317232413,0.290020144117187,0.504938182206081,0.0258295336729851,0,0.134246444694505,0.0270368157710686,0,0.0795696413169099,0,0.00152047916117856,0,0.0122164098152757,0,0.011349994207985,0,0.136994051357069,0.032531893823108,0.477479447202099,0,0,0.0612252889778166,0,0,0,0.012022474212844,0,0.0624856197537053,0.012584…
TCGA-AR-A2LR-01,0.0206681630481116,0.0291112953133859,0.261785960947404,0.0751294740141828,0.183151730130192,0.418645232851602,0.0609137980473567,0,0.022555671608053,0.046499055577666,0,0.105772371929166,0,0.0852031938367534,0,0,0,0.0283893300677492,0.0521850072624291,0,0.0534902810064137,0.480567553167616,0,0,0.0558948365726376,0,0,0.00852890092415874,0.025324018568521,0,0.00937718981475632,0.01…
TCGA-AR-A5QM-01,0.043460177792122,0.167881278797185,0.0540002479225982,0.137743785801856,0,0.605837948356981,0.025712590959427,0,0.0405504076153922,0.0553141115360081,0,0,0,0.0763341330624241,0.0246289076958822,0.0389192806131835,0.000103207182470118,0,0,0.316161706255597,0.0447053555314921,0.197177733640863,0,0,0.146392042456094,0.0340005234511667,0,0,0.013822229677847,0,0.021798544085841,0.0297…
TCGA-AR-A5QN-01,0.0990599888399272,0.130949283525644,0.102394206330215,0.132332063943241,0.0608898971847277,0.411763420420445,0.0686739281834394,0,0.072164193178236,0.107528432861548,0,0.217801287817223,0,0.0244413866532735,0,0,0,0.0044762563659709,0.00813469168175423,0,0.0815157486139197,0.312525291415155,0,0,0.0683282208115857,0.0344105624178956,0,0,0.0298296195921213,0,0.0313456720420755,0.046…
TCGA-AR-A5QP-01,0.0763414186759492,0.108114223606279,0.0822973136560427,0.0716100402997313,0.0827201713517415,0.293797523682443,0,0.00706131719715107,0.228764146875565,0.124707014043419,0,0.0756716829154396,0,0.0588863716704101,0,0,0,0.0511244579743862,0.0194794976604079,0.0393003536994089,0.0461351215255216,0.311568652698702,0.000599562341380286,0,0.0284586659373526,0.00824315546085512,0,0,0,0.0…
TCGA-AR-A5QQ-01,0,0.132100160139361,0.259483633376543,0.340895199522682,0,0.844712591866108,0.0398401153485892,0,0.0575757024498943,0.141346963053595,0,0.0738380253463003,0.00645632692984771,0.0626677847120323,0.0229169823404407,0.0281543514389953,0,0.0206925413261798,0,0.10892860015502,0.112907994615367,0.265517396928555,0.0185430715669772,0,0,0.0349421391473607,0,0.00567200464084627,0.032423372…
TCGA-B6-A0I1-01,0.0294331556013742,0.153063655153814,0,0,0,0.186775785332157,0.103571674610714,0,0.0894247313504112,0.0198630305502091,0,0,0,0.0523466226132876,0,0,0.0138439761237645,0.000702936651093048,0,0.521133221072579,0.041262637982361,0.140285992224227,0,0.00491224449074251,0.0126529323306108,0,0,0,0.0108836163677397,0,0.00939701393710389,0.00208726570485332,0,0,0,0.00550073715435455,0,0,0…
TCGA-B6-A0I2-01,0.0823031751425156,0.0231347591273695,0.311144944987027,0.165934102951839,0,0.48373918169054,0.017719436922672,0,0.0512449158643413,0.269823484595166,0,0,0.0289941043141718,0.112376078754298,0.0225215699884934,0,0,0.111530061756484,0.0206308089184365,0.0735936085219943,0.206740870500959,0.0679684294409497,0.0168566304220331,0,0,0,0,0,0.00746100426608175,0,0.0215773524603172,0.1136…
TCGA-B6-A0I5-01,0.0637650840254286,0.0336057848820664,0,0,0,0.0531811698757376,0.0711213564462764,0,0.0407529090248471,0.0748860277253633,0,0.122982394301731,0,0.0802787990491791,0.0434454907646856,0.0477245445813219,0,0,0,0.154545162886889,0.0461599375394271,0.31159442156127,0.00260593967079127,0,0.00390301644821842,0,0,0,0.0122105304571829,0,0.0069966977815248,0.0128568712416039,0,0.02111433676…
TCGA-B6-A0I6-01,0.034665055995921,0.122478499045858,0.0443358015935911,0.0984245085333151,0.0146770394768654,0.335683827280021,0,0.00390343659638639,0.016973285964951,0.074786083025193,0,0.0897900625149065,0,0.0732748310713757,0.110731039219338,0,0,0.0267797140860387,0.0223171531302724,0.325576813780047,0.0422664277076638,0.155423289967775,0.00837352521093401,0,0.0498043377251196,0,0,0,0,0.000974…
TCGA-B6-A0I8-01,0.030210055501994,0.0289831853795067,0.109789948045006,0,0.0187082460193125,0.152562671648809,0,0.0037380909927568,0.0182995197475312,0.0552253508218069,0,0.139135041160133,0,0.054291316183436,0.065100784444385,0,0.00767895878328172,0,0.0166680781028123,0.096549689997437,0.00293706142784306,0.309618062846045,0,0.00281373548133595,0.227934702155392,0,0,9.60785580405525e-06,0,0.0004…
TCGA-B6-A0I9-01,0.0520192943822839,0.0709874559047569,0.0116144257696253,0.0336668673416043,0,0.244365734941983,0.0259121539041111,0,0.09659875732234,0.0718855989196345,0,0.115148418649496,0,0.0469059642233693,0.0140554166716779,0,0,0.0312848912882301,0.0271684653779407,0.116785999407081,0.121011746034522,0.2865447492334,0,0.0266693726109066,0.0200284663572901,0,0,0,0.00776844295221667,0,0.028960…
TCGA-B6-A0IA-01,0.00907488817558931,0,0.00668314526118825,0,0,0,0.0313670363522737,0,0.00344686586923981,0,0.00877195428194003,0,0,0.139947501400149,0.0421755689908304,0.0562390049715258,0.0371831298045881,0,0,0.423135816912809,0,0.165504282321849,0,0.0660383833801742,0,0.0189832963637303,0.00720715935088994,0,0.00160588921256454,0,0.000176468208676268,0,0.00044909524114017,0,0,0.0071648523086424…
TCGA-B6-A0IB-01,0.0969130846102058,0,0.0540188954068872,0,0,0,0.106006263476437,0,0.0231480477939405,0.0831696935423234,0,0.0822931656969673,0,0.0389807326546164,0.0465555756746175,0,0,0.0700107528555799,0.00586811317977348,0.198975132697969,0.0474661676457107,0.232566265118321,0,0,0.0649600896637437,0,0,0,0.011883771746309,0,0.00259499870417551,0.00932369109007544,0,0.00922542843556907,0,0.00436…
[truncated: 10,084 more rows]
