# Supplementary material for: A Novel Prognostic Chemokine-Related lncRNAs Signature Associated with Immune Landscape in Colon Adenocarcinoma
Source: Dis Markers. 2022 Nov 3;2022:2823042. doi: 10.1155/2022/2823042 (PMC9649319; doi:10.1155/2022/2823042)
Supplement: Supplementary Materials — Supplementary Figure S1: (A) Heatmap of the expression of prognostic chemokine-related lncRNAs between tumor tissues and normal tissues. (B) Boxplot of the expression of prognostic chemokine-related prognostic lncRNAs in COAD tissues and normal tissues. (C) Barplot showed the proportion of 22 kinds of TIICs in each COAD sample. (D) Correlation between 22 kinds of TIICs was visualized. ∗p < 0.05; ∗∗p < 0.01; ∗∗∗p < 0.001. Supplementary Figure S2: Survival analysis was conducted in high-risk and low-risk patients with different clinical parameters. Supplementary Figure S3: Risk stratification showed the differences in drug susceptibility between high-risk and low-risk groups. Supplementary Table S1: Clinical information of the COAD patients. Supplementary Table S2: The 64 chemokine genes. Supplementary Table S3: Expression of 52 chemokine-related lncRNAs in COAD. Supplementary Table S4: Immune cell content of COAD samples was calculated using the CIBERSORT algorithm. Supplementary Table S5: Immune, Stromal, and ESTIMATE scores for COAD samples. Supplementary Table S6: Expression of 10 chemokine-related lncRNAs and risk score in the entire cohort. Supplementary Table S7: The immune cell infiltration status in all tumor samples in RNA-seq. Supplementary Table S8: Tumor mutation burden data of the low-risk group. Supplementary Table S9: Tumor mutation burden data of the high-risk group. Supplementary Table S10. The immunotherapy score data was obtained from the TCIA database. Supplementary Table S11: Quantitative real-time PCR primer sequences of model lncRNAs. Supplementary Table S12: The correlation values of immune cell infiltration and patient risk score. Supplementary Table S13: The correlation values of chemokine-related lncRNAs and immune cells. [file 2823042.f1.zip › Supplementary Table 10 (1).txt]

barcode	clinical_data_date_of_initial_pathologic_diagnosis	clinical_data_days_to_death	clinical_data_days_to_last_followup	clinical_data_days_to_last_known_alive	clinical_data_ethnicity	clinical_data_gender	clinical_data_hypermutated	clinical_data_methylation_subtype	clinical_data_msi_status	clinical_data_number_of_lymph_nodes	clinical_data_pathologic_stage	clinical_data_pathology_M_stage	clinical_data_pathology_N_stage	clinical_data_pathology_T_stage	clinical_data_race	clinical_data_radiation_therapy	clinical_data_residual_tumor	clinical_data_tumor_tissue_site	clinical_data_vital_status	clinical_data_years_to_birth	datasource	disease	expData	ips_ctla4_neg_pd1_neg	ips_ctla4_neg_pd1_pos	ips_ctla4_pos_pd1_neg	ips_ctla4_pos_pd1_pos	patient_uuid	slides_0
TCGA-A6-6137	2010	NA	824	NA	not hispanic or latino	male	NA	Cluster4	MSS	0	stage iiib	m0	n1c	t3	white	no	NA	colon	0	55	TCGA	COAD	1	9	8	9	8	326c1637-ea91-4006-b440-d38420af1ae5	NA
TCGA-QG-A5YX	2011	NA	1003	NA	not hispanic or latino	female	NA	NA	NA	0	stage iia	mx	n0	t3	black or african american	no	r0	colon	0	61	TCGA	COAD	1	10	8	10	8	300fff5a-0f61-402d-b845-3938ba7b1294	NA
TCGA-G4-6306	2007	NA	1359	NA	not hispanic or latino	male	0	CIMP-L	MSS	0	NA	m0	n0	t2	white	no	r0	colon	0	71	TCGA	COAD	1	10	9	10	9	303286c2-bc58-4bbb-9171-74cdb1d7f62f	NA
TCGA-AU-6004	2010	NA	824	NA	not hispanic or latino	female	1	CIMP-H	MSI-H	0	stage i	m0	n0	t2	white	NA	r0	colon	0	69	TCGA	COAD	1	9	8	9	8	32b77693-18e1-4692-8488-add1940c9e7c	NA
TCGA-AZ-4614	2008	172	NA	NA	not hispanic or latino	female	NA	CIMP-H	MSI-L	2	stage iva	m1	n1	t4a	white	no	r0	colon	1	71	TCGA	COAD	1	9	7	9	7	3334201d-a3c0-45ec-a9ed-cf48cc8c38e8	NA
TCGA-AA-3693	2008	NA	0	NA	NA	female	0	Cluster3	MSS	2	stage iv	m1	n1	t4	NA	NA	r2	colon	0	77	TCGA	COAD	1	9	7	8	6	33522271-b2ca-4da4-a942-501ab9117c51	NA
TCGA-AA-3977	2009	NA	761	NA	NA	male	1	Cluster3	MSS	0	NA	NA	n0	t2	NA	no	NA	colon	0	65	TCGA	COAD	1	8	7	8	7	33e989b9-fac4-47d8-b429-269044ac772a	NA
TCGA-CM-6161	2010	NA	457	NA	not hispanic or latino	female	0	Cluster4	MSI-L	0	stage i	m0	n0	t2	white	no	r0	colon	0	36	TCGA	COAD	1	8	7	8	6	3470b1af-689f-467a-9f9e-de74088f9b94	NA
TCGA-AA-A02E	2007	90	NA	NA	NA	female	NA	Cluster3	MSI-L	4	stage iv	m1	n1	t3	NA	NA	r2	colon	1	82	TCGA	COAD	1	10	8	9	8	35620be9-3ba5-4be7-9e00-83103e6a92e6	NA
TCGA-AA-3510	2005	NA	1946	NA	NA	male	NA	Cluster4	MSS	0	stage ii	m0	n0	t3	NA	no	r0	colon	0	70	TCGA	COAD	1	9	8	9	8	35c295c2-37d1-44b2-87a3-1039645e5bae	NA
TCGA-AY-6386	2010	NA	542	NA	not hispanic or latino	female	0	CIMP-L	MSS	1	stage iiib	m0	n1a	t3	black or african american	no	r0	colon	0	66	TCGA	COAD	1	9	8	9	7	35c9264f-34ec-4d75-ab80-aaac86108fc8	NA
TCGA-5M-AAT5	NA	NA	NA	NA	NA	NA	NA	NA	NA	NA	NA	NA	NA	NA	NA	NA	NA	NA	NA	NA	TCGA	COAD	1	9	7	9	7	515a062e-f68e-4100-a923-bd2ce0bbe071	NA
TCGA-AA-3555	2008	NA	911	NA	NA	female	1	CIMP-L	MSS	0	stage iia	m0	n0	t3	NA	no	r0	colon	0	81	TCGA	COAD	1	7	6	7	5	36eaf209-c332-4321-b6aa-51a3368ecd79	NA
TCGA-CK-5913	2008	NA	1561	NA	not hispanic or latino	female	1	CIMP-H	MSI-H	NA	stage iia	mx	n0	t3	white	no	rx	colon	0	58	TCGA	COAD	1	9	8	9	8	3758f4f7-ac2f-4f9d-bee2-526196f8129a	NA
TCGA-AA-A00L	2009	NA	1157	NA	NA	male	0	Cluster3	MSS	0	stage iia	m0	n0	t3	NA	no	r0	colon	0	66	TCGA	COAD	1	10	8	10	8	381cf7f3-cd7b-4660-8175-ff8062f7bf78	NA
TCGA-AA-3980	2009	NA	822	NA	NA	female	0	Cluster3	MSS	0	stage i	m0	n0	t2	NA	no	NA	colon	0	89	TCGA	COAD	1	9	8	9	8	384400c1-98d6-4cc3-8724-de6711f6208b	NA
TCGA-CK-5916	2003	643	NA	NA	not hispanic or latino	female	1	CIMP-H	MSI-H	NA	stage i	m0	n0	t1	white	no	rx	colon	1	71	TCGA	COAD	1	8	7	7	7	38d65618-4857-490e-86b3-0a3f772a9f60	NA
TCGA-D5-6541	2010	NA	474	NA	not hispanic or latino	male	0	Cluster4	MSS	0	stage iia	m0	n0	t3	white	no	r0	colon	0	49	TCGA	COAD	1	8	7	8	7	39aec099-a33e-47a4-a602-cbf65ddd3830	NA
TCGA-A6-6649	2010	NA	735	NA	not hispanic or latino	male	0	CIMP-H	MSS	2	stage iiib	m0	n1b	t3	white	no	NA	colon	0	66	TCGA	COAD	1	9	7	8	7	39b6ae01-c97b-4234-8a28-208fdf170432	NA
TCGA-AA-3869	2009	822	NA	NA	NA	male	0	Cluster3	MSS	14	stage iv	m1	n2	t4	NA	no	r2	colon	1	76	TCGA	COAD	1	9	8	9	8	39d3b5b3-d51e-4d77-a8aa-2977fa734fab	NA
TCGA-A6-2678	2009	NA	1286	NA	not hispanic or latino	female	0	Cluster3	MSS	2	stage iiib	m0	n1	t3	white	no	r0	colon	0	43	TCGA	COAD	1	8	7	8	6	3a785e32-7960-4c72-84c4-fb42c4dd86f1	bded5c5c-555a-492a-91c7-151492d0ee5e
TCGA-D5-6926	2011	NA	275	NA	not hispanic or latino	male	NA	Cluster4	MSS	3	stage iiib	m0	n1	t4a	white	yes	r0	colon	0	65	TCGA	COAD	1	7	7	7	6	3a8ca50f-bc9f-4250-8c8d-22893763ea46	NA
TCGA-G4-6626	2006	1422	NA	NA	not hispanic or latino	male	0	Cluster4	MSS	0	stage iia	m0	n0	t3	white	no	r0	colon	1	89	TCGA	COAD	1	10	8	9	8	3aae5316-6a5d-4b83-9020-ad691d4edf99	NA
TCGA-AZ-4308	2006	NA	3324	NA	not hispanic or latino	female	NA	Cluster4	MSS	3	stage iiib	m0	n1	t3	white	no	r0	colon	0	47	TCGA	COAD	1	10	8	9	8	3d8fd9b2-9aa2-4c81-8843-535ae66d6140	NA
TCGA-CA-5797	2010	NA	383	NA	not hispanic or latino	male	0	Cluster3	MSS	NA	stage iia	m0	n0	t3	asian	no	r0	colon	0	56	TCGA	COAD	1	9	7	8	7	3e0c34cb-fca5-4bcf-a5c1-5a7d286dd072	NA
TCGA-DM-A28K	2003	NA	2988	NA	not hispanic or latino	male	NA	CIMP-L	MSS	0	stage iia	m0	n0	t3	white	NA	NA	colon	0	75	TCGA	COAD	1	10	8	10	8	3e1886a8-2ed2-41ee-8b58-10f5321ade6f	NA
TCGA-A6-6782	2011	NA	617	NA	not hispanic or latino	male	0	Cluster4	MSS	0	stage iib	mx	n0	t4a	white	no	NA	colon	0	82	TCGA	COAD	1	9	7	8	7	3eb37b12-b8b4-40a3-bd8b-f89fc39c05fa	NA
TCGA-AA-3531	2007	NA	1035	NA	NA	female	0	Cluster3	MSI-L	0	stage iia	m0	n0	t3	NA	no	r0	colon	0	75	TCGA	COAD	1	10	9	10	8	401a37f3-6630-4400-a811-a262351e37de	NA
TCGA-CM-6676	2011	NA	337	NA	not hispanic or latino	male	0	Cluster4	MSI-L	0	stage i	m0	n0	t2	white	no	r0	colon	0	82	TCGA	COAD	1	8	6	7	5	4138aca8-e085-45fb-b353-74852efe61bf	NA
TCGA-AA-3675	2006	NA	1431	NA	NA	male	NA	NA	MSS	0	stage ii	m0	n0	t3	NA	no	r0	colon	0	84	TCGA	COAD	1	9	7	8	7	41658cf8-0de1-4a97-bb60-0f0107c84e00	NA
TCGA-G4-6294	2004	858	NA	NA	not hispanic or latino	male	NA	Cluster4	MSS	2	stage iv	m1	n1	t3	white	no	r0	colon	1	75	TCGA	COAD	1	10	8	9	7	41f8c9fd-ae52-4458-886b-faf37de77dd0	NA
TCGA-AA-3858	2009	NA	945	NA	NA	male	0	Cluster3	MSS	0	stage i	m0	n0	t2	NA	no	r0	colon	0	67	TCGA	COAD	1	9	8	9	7	44c2854e-3f8c-48e1-b4d5-1b5778d4fce4	NA
TCGA-AA-3812	2007	NA	1066	NA	NA	female	0	Cluster3	MSS	0	stage iia	m0	n0	t3	NA	no	r0	colon	0	82	TCGA	COAD	1	9	8	9	7	4563e4e0-a661-46de-ad25-9c86a621e147	NA
TCGA-AD-6963	2011	NA	834	NA	NA	male	NA	Cluster4	MSS	0	NA	mx	n0	t3	white	no	NA	colon	0	58	TCGA	COAD	1	10	9	10	9	47a8e514-904c-4867-8f43-7eb573be835b	NA
TCGA-A6-A5ZU	2013	NA	293	NA	not hispanic or latino	male	NA	NA	NA	1	stage iiib	m0	n1	t3	black or african american	no	rx	colon	0	59	TCGA	COAD	1	9	8	8	7	4881a390-c4e4-48b4-ae66-140c64a87614	NA
TCGA-NH-A50T	2012	NA	553	NA	not hispanic or latino	female	NA	NA	NA	0	stage iia	mx	n0	t3	black or african american	no	r0	colon	0	68	TCGA	COAD	1	9	7	9	7	490eabca-4575-4bd6-9604-6b6e23d069ce	NA
TCGA-A6-2684	2009	NA	1127	NA	not hispanic or latino	female	NA	Cluster4	MSI-L	0	stage i	m0	n0	t2	white	no	r0	colon	0	75	TCGA	COAD	1	8	7	8	7	49929108-023e-4d35-b26d-50ab4d3ae581	NA
TCGA-F4-6808	2011	NA	1024	NA	not hispanic or latino	female	0	Cluster4	MSS	0	stage i	m0	n0	t1	white	no	r0	colon	0	54	TCGA	COAD	1	9	7	9	7	4a785dc7-f5f6-4607-a19d-e6354b2fb5a9	NA
TCGA-CM-5868	2010	NA	518	NA	not hispanic or latino	female	0	Cluster4	MSS	1	stage iva	m1a	n1a	t4a	white	no	r0	colon	0	59	TCGA	COAD	1	9	7	9	7	4aadf2a2-ce1e-4f94-b146-59292e83e7fd	NA
TCGA-A6-6138	2010	NA	685	NA	not hispanic or latino	male	0	CIMP-L	MSS	0	stage i	m0	n0	t2	white	no	NA	colon	0	61	TCGA	COAD	1	9	9	9	9	4ad9784e-1edc-4186-9b45-4dfe0003f74b	NA
TCGA-AA-A01Q	2003	NA	31	NA	NA	female	1	CIMP-L	MSI-H	0	stage ii	m0	n0	t3	NA	NA	r0	colon	0	48	TCGA	COAD	1	8	7	8	7	4be66108-e72a-406b-bb4b-f58ff2877336	NA
TCGA-A6-5661	2010	NA	1020	NA	not hispanic or latino	female	1	CIMP-H	MSI-H	0	stage iia	m0	n0	t3	black or african american	no	r0	colon	0	80	TCGA	COAD	1	10	8	9	8	4beee9d4-ee52-4fed-bcc4-d300f5ddd4d0	NA
TCGA-A6-5665	2010	NA	671	NA	not hispanic or latino	female	1	CIMP-H	MSI-H	0	stage iia	m0	n0	t3	white	no	r0	colon	0	84	TCGA	COAD	1	8	7	8	6	4c6c8d3d-e4a3-490a-9211-cfbe7e6ee25b	NA
TCGA-A6-2686	2009	1126	NA	NA	not hispanic or latino	female	NA	CIMP-H	MSI-H	0	stage iia	m0	n0	t3	white	no	r0	colon	1	81	TCGA	COAD	1	7	7	7	7	19d1a5fc-3ce9-4e43-a364-a4150bcf911b	NA
TCGA-AA-3833	2008	NA	485	NA	NA	female	1	CIMP-H	MSI-H	0	stage iia	m0	n0	t3	NA	no	r0	colon	0	63	TCGA	COAD	1	8	7	8	7	1a09207e-9184-4f32-bd07-a9f4dc6c825d	NA
TCGA-AA-3530	2007	NA	580	NA	NA	male	0	Cluster3	MSS	0	stage i	m0	n0	t2	NA	no	r0	colon	0	80	TCGA	COAD	1	10	8	9	8	1ad0b9b9-7ded-4281-b114-9dcc6138c037	NA
TCGA-D5-5538	2010	1661	NA	NA	not hispanic or latino	female	0	Cluster3	MSS	3	stage iiib	m0	n1b	t3	white	no	r0	colon	1	60	TCGA	COAD	1	8	7	8	7	0dacc5ce-498f-4c60-9f78-7a013ffaa9ce	NA
TCGA-A6-5660	2010	NA	888	NA	not hispanic or latino	male	0	CIMP-L	MSS	11	stage iiic	m0	n2b	t3	black or african american	no	NA	colon	0	73	TCGA	COAD	1	8	6	8	6	0dc41cd5-0672-407c-9b4a-0f5f3970aa54	NA
TCGA-A6-6651	2010	NA	662	NA	not hispanic or latino	female	0	Cluster4	MSS	2	stage iiib	mx	n1b	t3	white	no	NA	colon	0	55	TCGA	COAD	1	8	7	7	6	0ec6ed47-db99-4273-9823-ffbde6a77091	NA
TCGA-AA-3851	2009	NA	1006	NA	NA	male	0	Cluster3	MSS	0	stage iia	m0	n0	t3	NA	no	r0	colon	0	74	TCGA	COAD	1	10	8	9	8	1add38c2-df6f-47c9-9373-0bec0e40baf8	NA
TCGA-DM-A1D0	2001	NA	3974	3625	not hispanic or latino	female	0	Cluster4	MSS	2	stage iia	m0	n0	t3	white	NA	NA	colon	0	79	TCGA	COAD	1	8	6	7	5	1b0b0533-7c4f-4edd-a75e-8b56f49d54ab	NA
TCGA-F4-6855	2011	NA	1442	NA	not hispanic or latino	female	0	Cluster4	MSI-L	0	stage iia	m0	n0	t3	white	no	r0	colon	0	70	TCGA	COAD	1	8	6	7	6	1c111912-c664-42f5-9802-065b1994a2f4	NA
TCGA-AD-5900	2010	NA	370	NA	not hispanic or latino	male	1	CIMP-H	MSI-H	0	stage i	mx	n0	t2	white	no	r0	colon	0	67	TCGA	COAD	1	8	7	8	7	0f008098-d8aa-46dc-8445-cca59838c582	NA
TCGA-A6-2679	2009	NA	1366	NA	not hispanic or latino	female	NA	CIMP-L	MSS	0	stage iib	NA	n0	t3	white	no	r0	colon	0	73	TCGA	COAD	1	10	10	10	10	0f74d992-00da-4728-9564-086ca1b95921	NA
TCGA-AA-3837	2008	NA	1186	NA	NA	male	0	CIMP-L	MSS	0	stage iia	m0	n0	t3	NA	no	r0	colon	0	67	TCGA	COAD	1	10	8	9	7	0f940ec0-eb0b-422a-a764-a26c8e5c216d	NA
TCGA-AA-A00A	2009	NA	1157	NA	NA	male	1	CIMP-H	MSI-H	0	stage iia	m0	n0	t3	NA	no	r0	colon	0	80	TCGA	COAD	1	9	8	9	8	10628a61-bd5e-4415-af97-631c5ca320cb	NA
TCGA-NH-A8F8	2013	511	NA	NA	not hispanic or latino	male	NA	NA	Indeterminate	15	stage iv	m1	n2b	t4a	black or african american	no	r0	colon	1	79	TCGA	COAD	1	9	7	8	7	1e0789d6-7efb-4807-8d36-cd9224675a0c	NA
TCGA-AA-A02K	2009	426	NA	NA	NA	male	NA	CIMP-L	MSS	7	stage iv	m1	n2	t4	NA	no	r2	colon	1	50	TCGA	COAD	1	9	7	8	6	10881458-55b2-41d1-8358-4ee6ccb8ec85	NA
TCGA-AA-3971	2007	NA	489	NA	NA	male	0	Cluster3	MSS	2	stage iii	m0	n1	t3	NA	no	r0	colon	0	58	TCGA	COAD	1	10	8	9	8	10994156-7c2f-420e-aeb8-11d566b3d5e4	NA
TCGA-5M-AAT4	2009	49	NA	NA	hispanic or latino	male	NA	NA	Indeterminate	0	stage iv	m1b	n0	t3	black or african american	no	r0	colon	1	74	TCGA	COAD	1	8	7	8	6	1136dd50-242a-4659-aad4-c53f9e759bb3	NA
TCGA-AZ-4313	2007	NA	2310	NA	not hispanic or latino	female	NA	Cluster4	MSI-H	0	stage i	m0	n0	t1	white	no	NA	colon	0	51	TCGA	COAD	1	10	9	10	8	1fd75c4d-e74c-410c-a150-814722c6c1cc	NA
TCGA-AA-3872	2009	NA	0	NA	NA	male	0	Cluster3	MSS	23	stage iv	m1	n2	t4	NA	NA	r2	colon	0	45	TCGA	COAD	1	9	7	8	7	20ccd267-74e5-4574-a8e1-028bcd74aaeb	NA
TCGA-AA-3562	2008	NA	608	NA	NA	male	0	Cluster3	MSS	7	stage iiic	m0	n2	t3	NA	no	r0	colon	0	82	TCGA	COAD	1	9	7	9	7	127f738d-afa1-42f6-a9a0-f33806667b84	NA
TCGA-D5-6932	2011	NA	346	NA	not hispanic or latino	male	NA	CIMP-L	MSS	0	stage iia	m0	n0	t3	white	no	r0	colon	0	69	TCGA	COAD	1	8	7	8	7	131e0571-de86-415f-b3fb-dc9f971258d3	NA
TCGA-AA-A01F	2009	NA	974	NA	NA	male	0	Cluster3	MSS	2	stage iiib	m0	n1	t3	NA	no	r0	colon	0	72	TCGA	COAD	1	9	8	9	7	132229e5-947d-43e9-a54c-a97d4be7d604	NA
TCGA-AA-3850	2009	0	NA	NA	NA	male	0	CIMP-L	MSS	0	stage i	m0	n0	t2	NA	NA	r0	colon	1	74	TCGA	COAD	1	9	8	9	8	21bdad0d-c6a2-428c-b2b4-0de282b34abc	NA
TCGA-A6-6140	2011	NA	734	NA	not hispanic or latino	male	NA	Cluster4	MSS	0	stage iia	m0	n0	t3	white	no	NA	colon	0	62	TCGA	COAD	1	9	8	9	7	21ddbfaa-1b21-4a2b-be2c-237dd69b20ff	NA
TCGA-CM-5349	2010	NA	915	NA	not hispanic or latino	female	0	CIMP-L	MSS	0	stage iia	m0	n0	t3	white	no	r0	colon	0	68	TCGA	COAD	1	8	6	7	6	227f945f-76fd-4a63-9609-d4e730a3d22a	NA
TCGA-G4-6299	2005	NA	2268	NA	not hispanic or latino	male	0	CIMP-H	MSS	8	stage iiic	m0	n2	t3	white	no	r0	colon	0	69	TCGA	COAD	1	9	8	9	8	23252dca-e836-47a0-b294-758ad60aa259	NA
TCGA-AA-3695	2009	NA	0	NA	NA	female	0	CIMP-L	MSS	6	stage iv	m1	n2	t3	NA	NA	r2	colon	0	63	TCGA	COAD	0	NA	NA	NA	NA	23d0681a-912a-408f-b19a-0bbcf5ffc2f3	NA
TCGA-AA-3821	2008	NA	31	NA	NA	female	1	CIMP-H	MSI-H	0	stage i	m0	n0	t2	NA	no	r0	colon	0	81	TCGA	COAD	1	9	8	9	8	0e87e5fd-d5bb-4c0d-952d-711a6abbf336	NA
TCGA-F4-6854	2011	NA	16	NA	not hispanic or latino	female	NA	Cluster4	MSS	0	stage iia	m0	n0	t3	white	no	r0	colon	0	77	TCGA	COAD	1	8	7	8	6	01240896-3f3f-4bf9-9799-55c87bfacf36	NA
TCGA-AA-A00E	2007	NA	913	NA	NA	male	1	CIMP-H	MSI-H	0	stage iia	m0	n0	t3	NA	no	r0	colon	0	65	TCGA	COAD	1	9	8	9	8	124b6856-f581-46da-9068-b0a49b999785	NA
TCGA-A6-5666	2010	NA	995	NA	not hispanic or latino	male	0	Cluster3	MSI-L	0	stage iic	m0	n0	t4b	white	no	NA	colon	0	78	TCGA	COAD	1	9	7	8	6	25c3201a-3dd5-4edf-ad09-104e5c10663e	NA
TCGA-G4-6303	2006	2003	NA	NA	not hispanic or latino	female	0	Cluster4	MSI-L	1	stage iv	m1	n1	t3	white	no	r0	colon	1	54	TCGA	COAD	1	8	6	7	6	264c0d45-078a-4207-a101-71f99bcd237e	NA
TCGA-AA-3552	2008	396	NA	NA	NA	male	0	Cluster3	MSS	10	stage iiic	m0	n2	t3	NA	no	r0	colon	1	85	TCGA	COAD	1	10	9	10	8	265d7b06-65fe-42c5-ad21-e6b160e94718	NA
TCGA-CA-6717	2010	NA	388	NA	not hispanic or latino	male	1	CIMP-L	MSS	NA	stage iia	m0	n0	t3	asian	no	rx	colon	0	57	TCGA	COAD	1	7	6	7	6	268c01b3-d2ce-44c0-a2fe-ea846a1253cc	NA
TCGA-AA-3527	2007	NA	0	NA	NA	female	0	CIMP-L	MSS	0	stage iia	m0	n0	t3	NA	NA	r0	colon	0	89	TCGA	COAD	1	10	10	10	9	269e8ca8-722d-449b-ace1-6545bd72bdd6	NA
TCGA-AM-5820	2010	NA	14	NA	not hispanic or latino	female	1	Cluster4	MSS	4	stage iva	m1	n2	t4a	white	NA	r0	colon	0	59	TCGA	COAD	1	8	6	7	6	26a12266-c6d8-42f9-bd4e-5093d827ac9a	NA
TCGA-CA-5254	2010	NA	386	NA	not hispanic or latino	female	NA	CIMP-H	MSI-L	NA	stage iia	m0	n0	t3	asian	no	rx	colon	0	42	TCGA	COAD	1	9	8	9	7	26a41625-4680-47b2-afa9-6a72b148e1c0	NA
TCGA-G4-6293	2002	NA	4051	NA	not hispanic or latino	female	0	CIMP-L	MSI-L	1	stage iii	m0	n1	t3	white	no	r0	colon	0	49	TCGA	COAD	1	9	8	9	8	27d9c162-11bb-48fb-a41a-aa05fcb4c1c2	NA
TCGA-CM-6172	2010	NA	335	NA	not hispanic or latino	female	0	Cluster4	MSS	1	stage iiib	m0	n1a	t3	white	no	r0	colon	0	70	TCGA	COAD	1	9	8	9	7	40c217ee-429f-41f4-adc6-db9186622b17	NA
TCGA-D5-6898	2011	NA	229	NA	not hispanic or latino	female	NA	CIMP-L	MSS	0	stage i	m0	n0	t2	white	no	r0	colon	0	51	TCGA	COAD	1	7	6	7	5	27e2438d-bd01-4c50-9102-563276ed9922	NA
TCGA-AA-3506	2004	NA	1765	NA	NA	male	NA	Cluster3	MSS	0	stage i	m0	n0	t2	NA	no	r0	colon	0	77	TCGA	COAD	1	9	7	8	7	28033279-cc74-4775-afdf-2497f6ddb55c	NA
TCGA-D5-6930	2011	NA	406	NA	not hispanic or latino	male	1	Cluster4	MSI-H	0	stage iia	m0	n0	t3	white	no	r0	colon	0	67	TCGA	COAD	1	10	9	10	9	286cbae3-8324-43b7-9b20-0f40dda1588e	NA
TCGA-A6-5667	2010	NA	887	NA	not hispanic or latino	female	0	Cluster4	MSS	1	stage iiib	mx	n1a	t3	white	no	r0	colon	0	40	TCGA	COAD	1	8	6	8	6	28d03569-8717-40da-8989-70baf2b18f9f	NA
TCGA-F4-6461	2011	338	NA	NA	not hispanic or latino	female	0	CIMP-H	MSS	5	stage iiic	m0	n2	t4b	white	no	r0	colon	1	41	TCGA	COAD	1	9	8	9	8	2900eadd-7e27-4371-94e5-7d58cdff0138	NA
TCGA-F4-6460	2011	972	NA	NA	not hispanic or latino	female	0	Cluster4	MSS	1	stage iiib	m0	n1	t3	white	no	r0	colon	1	51	TCGA	COAD	1	9	7	8	7	2a7bbafe-d499-4241-ba3d-a52ba0a5db3c	NA
TCGA-AA-A03F	2004	549	NA	NA	NA	female	0	CIMP-H	MSS	4	stage iii	m0	n2	t3	NA	no	r0	colon	1	90	TCGA	COAD	1	10	8	10	8	2a971e32-b0e7-4a3f-8c40-62d69c0307d8	NA
TCGA-AA-3712	2004	NA	0	NA	NA	male	NA	Cluster4	MSS	12	stage iii	m0	n2	t3	NA	NA	r0	colon	0	65	TCGA	COAD	1	9	8	9	7	2b94070a-21ec-457b-88af-3d2a89b97ac6	NA
TCGA-G4-6628	2006	NA	2424	NA	not hispanic or latino	male	1	CIMP-H	MSI-H	0	stage i	m0	n0	t2	white	no	r0	colon	0	78	TCGA	COAD	1	9	9	9	9	2c0a725a-e829-4d84-89d9-d0d47f6cfa37	NA
TCGA-AY-6196	2010	NA	6	NA	not hispanic or latino	male	0	Cluster4	MSI-L	12	stage iiic	NA	n2b	t3	white	NA	r0	colon	0	47	TCGA	COAD	1	8	8	8	8	2c30dc20-18a8-44f9-ab10-558c1e5634dc	NA
TCGA-AA-3688	2007	NA	578	NA	NA	male	0	Cluster3	MSI-L	2	stage iv	m1	n1	t3	NA	no	r2	colon	0	80	TCGA	COAD	1	10	8	9	8	2c9996bb-af6e-4424-881a-e81b9c9aeb78	NA
TCGA-AA-3560	2009	NA	608	NA	NA	female	0	Cluster3	MSS	5	stage iiic	m0	n2	t3	NA	no	r0	colon	0	72	TCGA	COAD	1	9	8	9	7	2d02bd7a-5beb-4e43-9ccb-18d89c9d5ca2	NA
TCGA-CM-5341	2010	NA	884	NA	not hispanic or latino	female	0	CIMP-L	MSS	1	stage iiia	m0	n1a	t2	white	no	r0	colon	0	82	TCGA	COAD	1	9	7	8	7	2d3ce817-b269-4662-a92d-392bd3662399	NA
TCGA-CK-4951	2007	2134	NA	NA	not hispanic or latino	female	NA	CIMP-H	MSI-H	0	stage iia	m0	n0	t3	white	no	r1	colon	1	79	TCGA	COAD	1	8	7	8	7	2db3c23d-c591-4ea0-b0a8-ed9c4343c80e	NA
TCGA-AA-3548	2008	NA	1034	NA	NA	female	0	Cluster3	MSS	4	stage iiic	m0	n2	t3	NA	no	r0	colon	0	71	TCGA	COAD	1	9	8	9	7	2dced66c-1f0d-4039-a5e5-54cca77c16e9	NA
TCGA-AA-A01X	2004	NA	791	NA	NA	female	0	Cluster3	MSS	2	stage iii	m0	n1	t2	NA	no	rx	colon	0	80	TCGA	COAD	1	8	6	7	5	2e386e48-b99b-4806-a3e3-081d72a606e7	NA
TCGA-AA-3561	2009	NA	424	NA	NA	male	0	Cluster3	MSS	NA	stage iia	m0	n0	t3	NA	no	r0	colon	0	72	TCGA	COAD	1	9	7	9	7	01ad5016-f691-4bca-82a0-910429d8d25b	NA
TCGA-AA-A00O	2008	NA	822	NA	NA	female	0	Cluster3	MSI-L	32	stage iiic	m0	n2	t3	NA	no	r0	colon	0	83	TCGA	COAD	1	8	7	8	6	01f493d4-229d-47a6-baa8-32a342c65d01	NA
TCGA-DM-A28F	2002	1094	NA	NA	not hispanic or latino	male	NA	Cluster3	MSS	1	stage iiib	m0	n1	t3	white	NA	NA	colon	1	73	TCGA	COAD	1	10	8	9	7	022f39e9-57ee-4b2b-8b3a-8929e3d69a37	NA
TCGA-AY-4071	2009	29	NA	NA	not hispanic or latino	female	0	Cluster3	MSS	0	stage i	NA	n0	t1	white	no	r0	NA	1	63	TCGA	COAD	1	10	9	10	9	315ef7f6-ca21-4d87-8f19-40bd455885ec	NA
TCGA-AA-3655	2005	NA	1856	NA	NA	male	0	Cluster4	MSS	0	stage ii	m0	n0	t3	NA	no	r0	colon	0	68	TCGA	COAD	1	9	7	8	7	31a3877d-3e82-450e-811f-3448b06f3950	NA
TCGA-D5-5540	2010	NA	1706	NA	not hispanic or latino	male	0	CIMP-L	MSI-L	0	stage iia	m0	n0	t3	white	no	r0	colon	0	73	TCGA	COAD	1	8	6	7	6	31d960d7-8f5b-4d22-bf5e-fae0849c4efd	NA
TCGA-AA-3866	2006	NA	518	NA	NA	female	0	Cluster3	MSI-L	0	stage i	m0	n0	t2	NA	no	r0	colon	0	78	TCGA	COAD	1	9	8	8	8	02f9668c-71e6-485f-88b1-b37dc8bdd2ab	NA
TCGA-AA-3524	2007	NA	1096	NA	NA	male	0	Cluster3	MSS	0	stage ii	m0	n0	t3	NA	no	r0	colon	0	85	TCGA	COAD	1	9	8	9	8	03efbc94-a43d-4db0-9377-e397348430a6	NA
TCGA-AA-3877	2007	NA	943	NA	NA	female	1	CIMP-H	MSI-H	0	stage i	m0	n0	t1	NA	no	r0	colon	0	83	TCGA	COAD	1	9	8	9	8	043a4745-566b-4106-b159-99cb8b394b81	NA
TCGA-AA-3986	2007	NA	580	NA	NA	male	0	CIMP-L	MSS	0	stage i	m0	n0	t2	NA	no	r0	colon	0	73	TCGA	COAD	1	9	8	9	8	04d7a52f-a89b-4114-a608-a6254b4d604f	NA
TCGA-AA-3862	2009	NA	914	NA	NA	male	NA	Cluster3	MSS	0	stage iia	m0	n0	t3	NA	no	r0	colon	0	82	TCGA	COAD	1	10	9	10	9	05ff79c5-1127-4cac-8f4c-84089a3f2cde	NA
TCGA-NH-A6GC	2013	NA	389	NA	not hispanic or latino	female	NA	NA	Indeterminate	3	stage ivb	m1b	n1b	t4b	black or african american	no	r0	colon	0	66	TCGA	COAD	1	10	8	9	7	0687bea4-911a-4ef2-9fa2-531ef6ba7910	NA
TCGA-AA-A010	2008	NA	1064	NA	NA	female	1	Cluster3	MSI-L	0	stage iib	m0	n0	t4	NA	no	r0	colon	0	46	TCGA	COAD	1	7	6	8	6	0712566e-3371-4715-95f1-5b792e72d758	NA
TCGA-A6-2675	2009	NA	1321	NA	not hispanic or latino	male	0	Cluster4	MSS	0	stage iia	mx	n0	t3	white	no	r0	colon	0	78	TCGA	COAD	1	8	7	8	7	07dc5a1d-64b7-42ba-928e-9753bd533c1e	NA
TCGA-AA-A00D	2007	NA	578	NA	NA	male	0	CIMP-H	MSS	0	stage i	m0	n0	t2	NA	no	r0	colon	0	70	TCGA	COAD	1	9	9	9	9	081a3dc7-45e1-457d-add0-c4686140a8d0	NA
TCGA-AA-A00U	2009	NA	518	NA	NA	male	0	CIMP-L	MSS	0	stage iiib	m0	n1	t3	NA	no	r0	colon	0	50	TCGA	COAD	1	9	7	8	7	091e3084-04ee-4497-893c-d46226dec78f	NA
TCGA-AA-3519	2007	NA	276	NA	NA	male	0	Cluster3	MSS	3	stage iii	m0	n1	t3	NA	no	r0	colon	0	63	TCGA	COAD	1	10	8	9	8	09942e9f-c178-44bc-9cd9-f5bfa350b23f	NA
TCGA-AA-3502	2003	NA	1065	NA	NA	male	0	CIMP-L	MSI-L	0	stage i	m0	n0	t2	NA	no	r0	colon	0	73	TCGA	COAD	1	10	8	9	7	8368d745-c74d-4236-ba75-16ca7aaeb3ca	NA
TCGA-AA-A01P	2003	1158	NA	NA	NA	female	1	CIMP-H	MSI-H	1	stage iii	m0	n1	t3	NA	no	r0	colon	1	80	TCGA	COAD	1	9	9	9	9	13ae9d83-a22f-451f-88bb-686051725cf3	NA
TCGA-AD-6888	2010	472	NA	NA	not hispanic or latino	male	0	Cluster4	MSS	2	stage iiib	m0	n1b	t3	white	no	r0	colon	1	73	TCGA	COAD	1	9	7	8	7	13eff2e5-e33a-485f-9ba4-8a7ccb3c7528	NA
TCGA-DM-A288	2001	427	NA	NA	not hispanic or latino	male	NA	CIMP-L	MSS	4	stage iiic	m0	n2	t3	white	NA	NA	colon	1	68	TCGA	COAD	1	9	7	8	6	143f2dd6-a280-41c5-9242-442ef91b73ec	NA
TCGA-G4-6310	2008	NA	1935	NA	not hispanic or latino	male	0	Cluster4	MSS	1	stage iiib	m0	n1	t3	white	yes	r0	colon	0	69	TCGA	COAD	1	9	7	8	6	14c13b05-abfe-472e-83a9-b28f60e58ad8	NA
TCGA-AY-5543	2010	NA	1004	NA	not hispanic or latino	female	0	Cluster4	MSS	1	stage iva	m1	n1a	t3	black or african american	no	r0	colon	0	65	TCGA	COAD	1	10	8	9	8	14cc6f5b-5692-471e-98b4-ae200b3d8fed	NA
TCGA-AA-3976	2009	NA	791	NA	NA	male	0	Cluster3	MSS	2	stage iiia	m0	n1	t2	NA	no	r0	colon	0	70	TCGA	COAD	1	9	7	8	7	14efca0c-882d-4fba-b15c-64af6e213b80	NA
TCGA-AZ-6605	2008	159	NA	NA	not hispanic or latino	male	0	Cluster4	MSS	1	stage iiib	m0	n1	t4	white	no	NA	colon	1	77	TCGA	COAD	1	9	8	8	7	849031de-ac8a-4012-9362-d192512997f1	NA
TCGA-DM-A1D4	1999	2821	NA	2821	not hispanic or latino	male	0	CIMP-H	MSI-L	0	stage iia	m0	n0	t3	white	NA	NA	colon	1	80	TCGA	COAD	1	10	8	9	7	849442d3-eb82-416e-9d36-2fc15dfac67a	NA
TCGA-QG-A5Z2	2012	NA	952	NA	not hispanic or latino	male	NA	NA	NA	0	stage i	m0	n0	t2	black or african american	no	r0	colon	0	61	TCGA	COAD	1	10	9	10	9	84959e50-17f5-4f2b-8e0c-5ebb139d2c3a	NA
TCGA-AA-A01S	2004	NA	31	NA	NA	female	0	Cluster3	MSI-L	1	stage iii	m0	n1	t3	NA	NA	r0	colon	0	47	TCGA	COAD	1	10	8	9	7	84e34cf2-b3bb-4a1a-8fb7-6c2c604c4008	NA
TCGA-AA-3713	2005	NA	579	NA	NA	male	1	CIMP-H	MSI-H	0	stage iv	m1	n0	t3	NA	yes	r2	colon	0	68	TCGA	COAD	1	8	7	8	7	57a2044d-20cc-4d02-b268-ce570a0fabe3	NA
TCGA-CM-6168	2010	NA	395	NA	not hispanic or latino	female	0	Cluster4	MSI-L	0	stage iia	m0	n0	t3	black or african american	no	r0	colon	0	84	TCGA	COAD	1	8	7	8	7	75c3004d-1ef4-49f9-86e0-1bb7b9553a3d	NA
TCGA-CM-6166	2010	NA	669	NA	not hispanic or latino	female	0	CIMP-L	MSS	0	stage i	m0	n0	t2	white	no	r0	colon	0	48	TCGA	COAD	1	8	6	7	5	aedde4a5-6520-40b9-9721-c9b826490b7a	NA
TCGA-A6-A567	2007	1881	NA	NA	NA	male	NA	NA	NA	3	stage iv	m1	n1	t3	black or african american	no	NA	colon	1	56	TCGA	COAD	1	9	7	8	7	857a5889-19e7-4208-8362-f1377c408037	NA
TCGA-AZ-5403	2000	1910	NA	NA	not hispanic or latino	male	0	Cluster4	MSS	0	stage ii	mx	n0	t3	white	no	NA	colon	1	43	TCGA	COAD	1	8	6	7	6	85a57cfe-f1c9-44d9-8b50-022c0d3438d1	NA
TCGA-DM-A28E	2001	NA	3648	NA	not hispanic or latino	female	NA	Cluster4	MSS	0	stage iia	m0	n0	t3	white	NA	NA	colon	0	72	TCGA	COAD	1	10	8	9	7	85bdc1ac-a1a4-46c2-bc2d-e5fabf5c89e9	NA
TCGA-AA-3492	2002	92	NA	NA	NA	female	1	CIMP-H	MSI-H	0	stage ii	m0	n0	t3	NA	no	r0	colon	1	89	TCGA	COAD	1	8	7	8	7	85e95dda-6198-464a-9187-fd0832bebb72	NA
TCGA-A6-3809	2009	NA	996	NA	not hispanic or latino	female	NA	CIMP-H	MSI-H	0	stage iib	m0	n0	t4	white	no	r0	colon	0	71	TCGA	COAD	1	8	8	8	8	8632579e-d318-4dab-9994-d3945afc42ab	NA
TCGA-AA-3543	2008	NA	30	NA	NA	male	1	CIMP-H	MSI-H	0	stage i	m0	n0	t2	NA	no	r0	colon	0	84	TCGA	COAD	1	8	8	8	7	912b61a1-6a5b-451c-b753-9c3dac03e8cb	NA
TCGA-AA-3495	2002	NA	1127	NA	NA	male	NA	CIMP-L	MSS	0	stage i	m0	n0	t2	NA	no	r0	colon	0	79	TCGA	COAD	1	9	7	8	7	15b987ba-77ab-477b-a54a-65ec5c7c399e	NA
TCGA-D5-5539	2010	NA	596	NA	not hispanic or latino	male	0	Cluster4	MSS	1	stage iiia	m0	n1	t3	white	no	r0	colon	0	60	TCGA	COAD	1	8	7	8	6	15d1b0fb-5c5f-4689-94f5-b33120a2bfae	NA
TCGA-4N-A93T	2013	NA	146	NA	not hispanic or latino	male	NA	NA	Indeterminate	NA	stage iiib	m0	n1b	t4a	black or african american	no	r0	colon	0	67	TCGA	COAD	1	10	8	9	7	92554413-9ebc-4354-8e1b-9682f3a031d9	NA
TCGA-DM-A1D8	2000	383	NA	383	not hispanic or latino	female	0	CIMP-L	MSS	1	NA	NA	n1	t3	white	NA	NA	colon	1	50	TCGA	COAD	1	10	9	10	8	92c043b6-8d53-4c1c-808a-c4be5e2926e6	NA
TCGA-AA-3967	2008	NA	943	NA	NA	male	NA	NA	MSS	2	stage iiib	m0	n1	t3	NA	no	r0	colon	0	77	TCGA	COAD	0	NA	NA	NA	NA	86a9e44f-728e-48e4-9e1b-682b023f7c0a	NA
TCGA-AA-A01I	2009	NA	943	NA	NA	male	0	CIMP-L	MSS	0	stage i	m0	n0	t2	NA	no	r0	colon	0	76	TCGA	COAD	1	10	8	10	8	86d18004-9478-4e46-83b4-4fbe445ccb70	NA
TCGA-AA-3973	2007	NA	397	NA	NA	male	0	Cluster3	MSI-L	3	stage iv	m1	n1	t4	NA	no	r2	colon	0	69	TCGA	COAD	1	9	8	9	7	e8841edf-e070-425b-b4d4-bbb2115f9dbd	NA
TCGA-A6-5656	2010	NA	1001	NA	not hispanic or latino	male	0	Cluster4	MSS	0	stage i	m0	n0	t2	white	no	NA	colon	0	74	TCGA	COAD	1	10	8	9	7	eb4e4e09-98b3-4e85-8dd2-75676ff2af14	NA
TCGA-AA-3848	2009	306	NA	NA	NA	female	0	CIMP-L	MSS	6	stage iiic	m0	n2	t3	NA	no	r0	colon	1	82	TCGA	COAD	1	10	8	9	8	0a815133-0edd-4422-89f2-2f067b6f2156	NA
TCGA-D5-6922	2011	NA	308	NA	not hispanic or latino	male	NA	Cluster4	MSS	1	stage iiia	m0	n1	t3	white	no	r0	colon	0	76	TCGA	COAD	1	8	7	8	7	0a94eecf-4db2-4846-8383-c83ff02e4a9f	NA
TCGA-G4-6588	2009	NA	796	NA	not hispanic or latino	female	1	CIMP-H	MSI-H	0	stage iia	m0	n0	t3	white	no	r0	colon	0	58	TCGA	COAD	1	9	7	8	7	93690a96-421c-4c59-85ba-fa6dd538c721	NA
TCGA-F4-6807	2011	NA	1309	NA	not hispanic or latino	female	0	Cluster4	MSS	12	stage iiic	m0	n2b	t3	white	no	r0	colon	0	51	TCGA	COAD	1	9	8	9	8	9382987c-b5b3-48fe-8194-4d83fe340cd0	NA
TCGA-AA-A029	2006	NA	1581	NA	NA	male	0	CIMP-H	MSI-L	0	stage ii	m0	n0	t3	NA	no	r0	colon	0	67	TCGA	COAD	1	10	8	9	8	93ca8937-97c0-4f6e-bdec-66d32f2a7b3d	NA
TCGA-AA-3972	2008	NA	1551	NA	NA	male	0	CIMP-L	MSI-L	3	stage iv	m1	n1	t3	NA	no	r2	colon	0	72	TCGA	COAD	1	9	7	8	7	93cd5d07-e0d3-40f8-ae7f-beadb1efb7c1	NA
TCGA-AA-3511	2005	NA	212	NA	NA	male	0	Cluster4	MSS	0	stage ii	m0	n0	t4	NA	no	r0	colon	0	64	TCGA	COAD	1	9	7	9	7	93edb105-5dc9-4a4a-9fca-c91f0161fcc7	NA
TCGA-D5-5541	2010	NA	1701	NA	not hispanic or latino	male	0	Cluster4	MSS	1	stage iiib	m0	n1a	t3	white	no	r0	colon	0	63	TCGA	COAD	1	8	7	7	6	94067eb7-98b7-4975-bab1-c09e1b454a25	NA
TCGA-A6-6780	2011	NA	612	NA	not hispanic or latino	male	1	CIMP-H	MSI-H	0	stage iia	mx	n0	t3	white	no	NA	colon	0	74	TCGA	COAD	1	8	8	8	8	88832340-46ad-449c-8f81-6a8e5b495510	NA
TCGA-CA-5256	2010	NA	379	NA	NA	female	NA	Cluster4	MSS	NA	stage iia	m0	n0	t3	asian	no	r0	colon	0	54	TCGA	COAD	1	9	8	9	7	17633a60-e12b-4a7c-bd8a-c16341ddc606	NA
TCGA-AA-3526	2007	NA	580	NA	NA	male	0	Cluster3	MSI-L	0	stage i	m0	n0	t2	NA	no	r0	colon	0	57	TCGA	COAD	1	9	8	9	8	88e64f45-adc4-4223-9838-4d7d45b8f0c0	NA
TCGA-AD-6889	2005	2532	NA	NA	NA	male	1	Cluster4	MSI-H	0	stage iia	m0	n0	t3	asian	no	r0	colon	1	NA	TCGA	COAD	1	9	8	9	7	955464c8-9c62-430c-87b8-107db5c980a8	NA
TCGA-CA-6716	2010	NA	371	NA	not hispanic or latino	male	0	CIMP-L	MSS	NA	stage iia	m0	n0	t3	asian	no	rx	colon	0	65	TCGA	COAD	1	8	6	7	5	95a54459-3fac-42d5-8ec1-ed66d971d64d	NA
TCGA-A6-4105	2010	442	NA	NA	not hispanic or latino	male	0	CIMP-H	MSS	0	stage iia	m0	n0	t3	white	no	NA	colon	1	79	TCGA	COAD	1	8	7	8	7	95d4f0c4-5997-4ffb-b876-0ddfeee972bb	NA
TCGA-A6-5662	2010	NA	718	NA	not hispanic or latino	male	0	Cluster4	MSS	7	stage iva	m1	n2	t3	white	no	NA	colon	0	46	TCGA	COAD	1	9	8	8	7	960d278c-c87d-42dc-ad28-42e010d8f0f1	NA
TCGA-AA-3856	2009	NA	30	NA	NA	male	0	Cluster3	MSS	0	stage iia	m0	n0	t3	NA	NA	r0	colon	0	59	TCGA	COAD	1	10	9	9	8	0b8de222-119a-40f3-8beb-12b9d933225b	NA
TCGA-G4-6323	2010	NA	419	NA	not hispanic or latino	male	NA	CIMP-L	MSS	0	stage ia	mx	n0	tis	black or african american	no	r0	colon	0	50	TCGA	COAD	1	10	8	9	8	0c463362-7925-4d9a-9d63-098b50af2fb9	NA
TCGA-F4-6703	2011	NA	1456	NA	not hispanic or latino	male	1	Cluster4	MSI-H	0	stage iia	m0	n0	t3	white	no	r0	colon	0	64	TCGA	COAD	1	7	7	7	7	0c53b010-4243-4da3-a059-7f54c9a850ec	NA
TCGA-AA-A01V	2004	NA	31	NA	NA	male	0	CIMP-L	MSS	0	stage i	m0	n0	t2	NA	NA	r0	colon	0	59	TCGA	COAD	1	9	9	10	9	0cb0dac8-4ce2-444a-b1ae-1550e065b4d9	NA
TCGA-AA-A00K	2009	NA	549	NA	NA	male	0	Cluster3	MSI-L	0	stage iia	m0	n0	t3	NA	NA	r0	colon	0	79	TCGA	COAD	1	9	7	9	7	0cbe9848-8eac-4ea8-a36b-fb74b4a33de7	NA
TCGA-CK-6746	2009	NA	-2	NA	not hispanic or latino	female	NA	CIMP-H	MSI-H	NA	stage iib	mx	n0	t4b	white	NA	rx	colon	0	84	TCGA	COAD	1	9	9	9	9	a6f98ee5-9638-4ebe-804b-fba54aea9f90	NA
TCGA-AA-A01K	2009	NA	943	NA	NA	female	0	Cluster3	MSS	4	stage iiic	m0	n2	t3	NA	no	r0	colon	0	74	TCGA	COAD	1	9	8	9	8	a72dd578-3a6f-4807-a843-4a942500944e	NA
TCGA-D5-6927	2011	NA	287	NA	not hispanic or latino	male	1	CIMP-L	MSI-H	0	stage iia	m0	n0	t3	white	no	r0	colon	0	34	TCGA	COAD	1	6	6	6	6	a782f174-241d-42c6-9bc4-61cc39f8b397	NA
TCGA-G4-6627	2007	NA	2275	NA	not hispanic or latino	male	NA	Cluster4	MSI-L	0	stage iia	m0	n0	t3	white	no	r0	colon	0	84	TCGA	COAD	1	9	8	9	7	19089ae0-b590-4649-9d94-a147fa506e32	NA
TCGA-AA-3819	2008	NA	761	NA	NA	female	0	Cluster3	MSI-L	0	stage iia	m0	n0	t3	NA	no	r0	colon	0	41	TCGA	COAD	1	9	7	8	6	192da41f-f0a5-494e-8eb9-96bcdae56ff8	NA
TCGA-A6-6652	2011	NA	751	NA	not hispanic or latino	male	0	Cluster4	MSS	0	stage iva	m1	n0	t3	black or african american	no	NA	colon	0	59	TCGA	COAD	1	9	7	9	7	96ac1f4b-79b0-4517-8caf-fc05abcaaf4f	NA
TCGA-CM-5860	2010	NA	974	NA	not hispanic or latino	male	0	CIMP-L	MSS	0	stage iia	m0	n0	t3	white	no	r0	colon	0	44	TCGA	COAD	1	9	8	9	8	96e013d9-8e89-46a7-8d07-bae95af36708	NA
TCGA-CM-5861	2010	NA	457	NA	not hispanic or latino	female	1	CIMP-H	MSI-H	0	stage iia	m0	n0	t3	white	no	r0	colon	0	63	TCGA	COAD	1	10	9	10	8	9743d31a-ea8f-4847-87d2-ebf77cc5983d	NA
TCGA-AA-A01R	2004	NA	1065	NA	NA	male	1	CIMP-L	MSI-H	9	stage iii	m0	n2	t3	NA	yes	r0	colon	0	47	TCGA	COAD	1	10	10	10	10	97f6c8d3-09a0-4128-8f10-41e736648a5f	NA
TCGA-CM-6677	2011	NA	337	NA	not hispanic or latino	female	0	CIMP-L	MSS	0	stage iia	m0	n0	t3	white	no	r0	colon	0	75	TCGA	COAD	1	9	7	8	7	a85e8208-a6f5-4e91-8f35-ef574f4273fc	NA
TCGA-AZ-6598	2000	1503	NA	NA	not hispanic or latino	female	1	CIMP-H	MSI-H	0	stage ii	mx	n0	t3	white	no	NA	colon	1	77	TCGA	COAD	1	8	7	7	6	a8b4284d-cbbb-43e3-897b-d04af4bfba74	NA
TCGA-3L-AA1B	2013	NA	475	NA	not hispanic or latino	female	NA	NA	Indeterminate	0	stage i	m0	n0	t2	black or african american	no	r0	colon	0	61	TCGA	COAD	1	8	7	8	6	a94e1279-a975-480a-93e9-7b1ff05cbcbf	NA
TCGA-A6-5659	2010	NA	926	NA	not hispanic or latino	male	0	CIMP-H	MSS	0	stage i	m0	n0	t2	white	no	r0	colon	0	82	TCGA	COAD	1	9	7	8	6	98d45099-feae-4dad-aa38-ec03fed6d999	NA
TCGA-DM-A285	2001	179	NA	NA	not hispanic or latino	female	0	CIMP-L	MSS	11	stage iv	m1	n2	t3	white	NA	NA	colon	1	71	TCGA	COAD	1	8	6	8	5	99c532b0-6b42-4925-a344-fc7262c415ee	NA
TCGA-AA-3975	2009	NA	1036	NA	NA	male	0	Cluster3	MSS	0	stage i	m0	n0	t2	NA	no	r0	colon	0	80	TCGA	COAD	1	9	7	9	7	a9cb21d1-4c4a-4f30-ad4d-c54bed26f187	NA
TCGA-AA-3532	2007	NA	882	NA	NA	male	0	Cluster3	MSS	0	stage iia	m0	n0	t3	NA	no	r0	colon	0	63	TCGA	COAD	1	9	9	9	9	aa85d9e8-caa6-422c-95ce-780e4ac2a5e4	NA
TCGA-AA-3696	2009	153	NA	NA	NA	female	0	Cluster3	MSS	1	stage iv	m1	n1	t3	NA	no	r2	colon	1	75	TCGA	COAD	1	8	6	7	5	aa909ffb-03e1-4e3f-8888-2212b23d90b7	NA
TCGA-DM-A28A	2001	805	NA	NA	not hispanic or latino	male	NA	CIMP-L	MSS	6	stage iiic	m0	n2	t3	white	NA	NA	colon	1	78	TCGA	COAD	1	9	7	8	7	9b2c325c-1f03-43c7-ad5c-b49c6d205635	NA
TCGA-G4-6298	2005	715	NA	NA	not hispanic or latino	male	0	Cluster4	MSI-L	1	stage iiib	mx	n1	t4a	black or african american	no	r0	colon	1	90	TCGA	COAD	1	7	5	6	5	ab9cc98a-86ae-4913-bcb2-cc3aeff8abb1	NA
TCGA-AA-3681	2006	NA	182	NA	NA	female	0	CIMP-L	MSS	2	stage iii	m0	n1	t3	NA	no	r0	colon	0	77	TCGA	COAD	1	9	8	8	7	abb0d53f-f74e-45dc-8fbb-40863016f3c6	NA
TCGA-G4-6314	2008	NA	1093	NA	not hispanic or latino	female	0	Cluster4	MSS	50	stage iv	m1	n2	t3	white	no	r0	colon	0	76	TCGA	COAD	1	8	6	8	6	abe658e0-33f9-4f57-849b-dec4d20964d6	NA
TCGA-D5-6532	2010	NA	555	NA	not hispanic or latino	male	0	Cluster3	MSI-L	0	stage iia	m0	n0	t3	white	no	r0	colon	0	61	TCGA	COAD	1	10	8	9	7	ac13d568-f79e-4ba7-b7bf-18e4354e0920	NA
TCGA-AA-3860	2009	NA	945	NA	NA	female	0	Cluster3	MSS	2	stage iiib	m0	n1	t3	NA	no	r0	colon	0	53	TCGA	COAD	1	9	8	9	8	ac6a3df9-41b1-4e5a-a15e-f44481384c23	NA
TCGA-AY-A69D	2012	NA	543	NA	not hispanic or latino	female	NA	NA	NA	0	stage iia	m0	n0	t3	black or african american	no	r0	colon	0	55	TCGA	COAD	1	9	7	8	7	acd51808-870c-4684-a2de-aa0b058729e1	NA
TCGA-AA-3538	2008	NA	791	NA	NA	female	0	Cluster3	MSS	0	stage i	m0	n0	t2	NA	no	r0	colon	0	54	TCGA	COAD	1	8	6	7	5	c594196e-49ef-4195-a6b6-4ef4a1d9ec15	NA
TCGA-AZ-4323	2002	43	NA	NA	not hispanic or latino	male	0	Cluster4	MSI-L	5	stage iv	m1	n2	t4	white	no	NA	colon	1	37	TCGA	COAD	1	9	8	9	8	c59d90a6-9cda-426d-b8ea-41f0a87033d5	NA
TCGA-AA-3518	2007	NA	31	NA	NA	female	1	CIMP-H	MSI-H	0	stage iia	m0	n0	t3	NA	NA	r0	colon	0	81	TCGA	COAD	1	10	9	9	8	c5c4a0a5-900d-483d-9282-475654d63265	NA
TCGA-AA-3678	2006	NA	1430	NA	NA	female	0	Cluster3	MSS	1	stage iii	m0	n1	t2	NA	no	r0	colon	0	60	TCGA	COAD	1	8	7	8	7	c616f95f-4ea1-4019-8c17-041878085c88	NA
TCGA-CK-5915	2007	NA	0	NA	not hispanic or latino	male	0	CIMP-L	MSS	NA	stage i	mx	n0	t2	white	NA	rx	colon	0	63	TCGA	COAD	1	8	6	7	5	c658f35d-ceeb-4189-8e3d-03e3b9706667	NA
TCGA-F4-6704	2011	NA	47	NA	not hispanic or latino	male	0	Cluster4	MSS	13	stage iiic	mx	n2b	t3	american indian or alaska native	NA	r0	colon	0	60	TCGA	COAD	1	9	8	8	7	c6ed47f4-358b-4f06-b5cd-cdf1d5c47b43	NA
TCGA-AY-A8YK	2013	NA	573	NA	not hispanic or latino	male	NA	NA	Indeterminate	6	stage iva	m1	n2a	t3	black or african american	no	r0	colon	0	44	TCGA	COAD	1	9	7	9	7	c6f6c032-5d4e-4028-aed0-24a587620354	NA
TCGA-D5-6529	2010	NA	614	NA	not hispanic or latino	male	0	CIMP-L	MSI-L	0	stage iia	m0	n0	t3	white	no	r0	colon	0	69	TCGA	COAD	1	8	8	8	7	9c34830b-4d7f-4b41-9659-fbfc36c145c9	NA
TCGA-QG-A5Z1	2011	256	NA	NA	not hispanic or latino	male	NA	NA	Indeterminate	3	stage iiib	mx	n1b	t3	black or african american	no	r0	colon	1	71	TCGA	COAD	1	8	6	7	5	9c45eaec-d854-4f51-80a3-2d80d6b4aebc	NA
TCGA-CA-6719	2011	NA	435	NA	not hispanic or latino	male	0	CIMP-L	MSI-L	NA	stage iia	m0	n0	t3	asian	no	rx	colon	0	77	TCGA	COAD	1	8	7	8	7	9cdca5d8-ea77-4df9-b2ba-0d5e8ec37bcd	NA
TCGA-AZ-6608	2009	59	NA	NA	not hispanic or latino	female	NA	Cluster3	MSI-L	2	stage iiia	m0	n1	t2	white	no	NA	colon	1	55	TCGA	COAD	1	9	7	9	7	f1e6ce83-b4a0-4643-8e8e-a1ef8a158a27	NA
TCGA-CK-5912	2006	1493	NA	NA	not hispanic or latino	male	0	Cluster3	MSS	NA	stage i	mx	n0	t2	white	no	rx	colon	1	81	TCGA	COAD	1	10	8	9	7	c085da47-d634-491a-80ea-514e5a231f70	NA
TCGA-CM-4746	2009	NA	1126	NA	not hispanic or latino	male	1	Cluster4	MSI-H	0	stage i	m0	n0	t2	black or african american	no	r0	colon	0	61	TCGA	COAD	1	8	7	8	6	c0b8c55c-b993-481d-aeea-9ebfa64ee20e	NA
TCGA-AD-6548	2011	NA	650	NA	not hispanic or latino	female	0	CIMP-L	MSI-L	0	stage i	m0	n0	t2	white	no	r0	colon	0	81	TCGA	COAD	1	9	8	8	7	c113808a-773f-4179-82d6-9083518404b5	NA
TCGA-AA-3952	2008	61	NA	NA	NA	male	0	Cluster3	MSS	6	stage iiic	m0	n2	t3	NA	NA	r0	colon	1	68	TCGA	COAD	1	9	7	8	6	c1e141af-bdd1-4176-8c0e-cf1ab0c1d9d3	NA
TCGA-AA-3811	2007	306	NA	NA	NA	female	1	Cluster3	MSI-H	5	stage iii	m0	n2	t3	NA	no	r0	colon	1	84	TCGA	COAD	1	9	8	9	8	d7ebd11a-1339-4b28-be90-a788d2cfa706	NA
TCGA-AY-A54L	2012	NA	525	NA	NA	female	NA	NA	NA	0	stage i	m0	n0	t2	black or african american	no	r0	colon	0	74	TCGA	COAD	1	9	7	8	6	d8e9ea52-ff28-4626-baa3-71350fd53ddf	NA
TCGA-A6-2677	2009	740	NA	NA	not hispanic or latino	female	0	Cluster3	MSS	5	stage iiic	m0	n2	t3	white	no	r0	colon	1	68	TCGA	COAD	1	9	7	8	6	d976782c-90c1-421d-b83c-7fc2617e2709	NA
TCGA-AA-3516	2007	396	NA	NA	NA	female	1	CIMP-H	MSI-H	7	stage iii	m0	n2	t3	NA	no	NA	colon	1	74	TCGA	COAD	1	10	10	10	10	d9d7f0d4-fa64-48f2-8037-52cbf0b34ad8	NA
TCGA-AA-3846	2009	NA	518	NA	NA	female	0	Cluster3	MSS	0	stage iia	m0	n0	t3	NA	no	r0	colon	0	74	TCGA	COAD	1	10	9	10	9	f2ef5afa-6191-43a1-a023-d53c0d985139	NA
TCGA-AA-3814	2007	NA	0	NA	NA	female	0	Cluster3	MSS	0	stage iia	m0	n0	t3	NA	NA	r0	colon	0	85	TCGA	COAD	1	9	7	8	7	f38d49b7-6cad-4460-abd0-3685a3b2d941	NA
TCGA-AA-3680	2006	335	NA	NA	NA	female	0	CIMP-L	MSI-L	12	stage iv	m1	n2	t4	NA	no	r2	colon	1	67	TCGA	COAD	1	9	7	9	7	f3b9defb-88ed-4c95-9feb-7197d869676c	NA
TCGA-AA-3663	2005	NA	212	NA	NA	male	1	CIMP-H	MSI-H	0	stage ii	m0	n0	t3	NA	no	r0	colon	0	42	TCGA	COAD	1	7	6	7	6	c21d2c68-920f-4526-b754-286579c049f3	NA
TCGA-CK-4950	2008	NA	2599	NA	not hispanic or latino	female	NA	CIMP-L	MSS	1	stage iiib	m0	n1	t3	black or african american	no	r1	colon	0	68	TCGA	COAD	1	9	8	9	8	c293a148-a88c-4fb3-b2f4-e64e918044f9	NA
TCGA-AA-3662	2005	NA	184	NA	NA	female	0	Cluster4	MSS	4	stage iv	m1	n2	t4	NA	no	r2	colon	0	80	TCGA	COAD	1	9	8	8	7	d9fb85c3-ade1-47bf-8159-170f81eb130f	NA
TCGA-G4-6320	2009	NA	804	NA	not hispanic or latino	male	1	CIMP-H	MSI-H	2	stage iii	mx	n1	t3	white	no	r0	colon	0	73	TCGA	COAD	1	10	8	9	7	da21e143-dbf6-4ac7-8872-f1d9ae39512d	NA
TCGA-AA-3984	2009	NA	0	NA	NA	female	1	Cluster3	MSS	0	stage iia	m0	n0	t3	NA	NA	r0	colon	0	61	TCGA	COAD	1	8	7	8	7	db246424-3979-4f23-b316-8d30c449ee15	NA
TCGA-DM-A1DA	1999	228	NA	228	not hispanic or latino	female	0	CIMP-H	MSI-L	5	stage iiic	m0	n2	t3	white	NA	NA	colon	1	71	TCGA	COAD	1	10	8	9	7	f4a804d3-b5c4-4da5-800f-6e5757ecfa1c	NA
TCGA-CM-6165	2010	NA	488	NA	not hispanic or latino	male	NA	Cluster4	MSS	0	stage iia	m0	n0	t3	white	no	r0	colon	0	74	TCGA	COAD	1	8	7	8	6	f4e047a5-bdb2-4bc2-aff0-e0f45bcc9062	NA
TCGA-AA-3710	2008	NA	821	NA	NA	female	1	CIMP-H	MSI-H	0	stage iia	m0	n0	t3	NA	no	r0	colon	0	80	TCGA	COAD	1	9	9	8	8	f5c3bc61-1018-4351-bb23-aacc1459365f	NA
TCGA-AA-3672	2006	NA	28	NA	NA	female	1	CIMP-H	MSI-H	4	stage iii	m0	n1	t3	NA	no	r0	colon	0	90	TCGA	COAD	1	10	10	10	10	c46971a1-cbac-425d-bac2-f4142c92522e	NA
TCGA-DM-A28M	2003	NA	2895	NA	not hispanic or latino	male	0	CIMP-L	MSS	0	stage iia	m0	n0	t3	white	NA	NA	colon	0	63	TCGA	COAD	1	10	8	9	7	c48e2ce0-3806-4675-92f3-d38ff67c5efa	NA
TCGA-AA-3517	2007	NA	1186	NA	NA	male	0	Cluster3	MSI-L	0	stage iia	m0	n0	t3	NA	no	r0	colon	0	60	TCGA	COAD	1	9	7	9	7	c4d74653-d26b-4e51-aee0-82ee3d42f883	NA
TCGA-A6-5657	2010	NA	962	NA	not hispanic or latino	male	NA	CIMP-L	MSS	1	stage iiib	m0	n1	t3	black or african american	no	r0	colon	0	65	TCGA	COAD	1	9	8	9	8	dbbee8f5-d83d-4195-85cf-f89d327da0a9	NA
TCGA-D5-6920	2011	NA	377	NA	not hispanic or latino	female	NA	CIMP-H	MSS	0	stage iia	m0	n0	t3	white	no	r0	colon	0	77	TCGA	COAD	1	9	8	9	7	dc22eba5-6fb7-4875-b30a-99fa00758301	NA
TCGA-AA-3685	2007	NA	1127	NA	NA	male	0	Cluster3	MSS	0	stage ii	m0	n0	t3	NA	no	r0	colon	0	69	TCGA	COAD	1	9	8	9	8	dca004bf-9c14-45a1-b186-ab3759f6c7fe	NA
TCGA-AY-6197	2010	NA	652	NA	not hispanic or latino	male	1	CIMP-H	MSI-H	0	stage iia	NA	n0	t3	white	no	r0	colon	0	60	TCGA	COAD	1	10	8	9	8	f6c674bf-396d-4bfe-8d08-e7266c314be3	NA
TCGA-CM-6164	2009	NA	883	NA	not hispanic or latino	female	NA	Cluster4	MSS	0	stage iia	m0	n0	t3	white	no	r0	colon	0	46	TCGA	COAD	1	9	8	9	7	6a4031c6-ee88-48be-81a5-a522720edd02	NA
TCGA-AY-4070	2007	496	NA	NA	not hispanic or latino	female	0	Cluster3	MSS	5	stage iiic	m0	n2	t3	black or african american	no	r1	colon	1	50	TCGA	COAD	1	9	7	9	7	6baf61b6-ae5b-42f0-adc9-0d26fda231f7	NA
TCGA-AA-A02F	2007	NA	1216	NA	NA	female	0	Cluster3	MSS	1	stage iv	m1	n1	t3	NA	no	r2	colon	0	68	TCGA	COAD	1	8	6	7	5	dd4be58e-da22-4bcd-bf4c-2b9e60ffda19	NA
TCGA-A6-A565	2008	494	NA	NA	NA	female	NA	NA	NA	13	stage iiic	mx	n2	t3	black or african american	no	rx	colon	1	34	TCGA	COAD	1	9	8	9	8	dd7a53ee-cb08-40c4-9935-51d1ca17e9e8	NA
TCGA-AA-3697	2003	NA	2587	NA	NA	male	1	Cluster4	MSI-L	0	stage ii	m0	n0	t3	NA	no	r0	colon	0	77	TCGA	COAD	1	9	8	9	8	dde411b2-5d2b-4638-8149-89bc1eb3c7ad	NA
TCGA-AA-3514	2006	NA	31	NA	NA	female	0	Cluster3	MSS	0	stage i	m0	n0	t2	NA	no	r0	colon	0	81	TCGA	COAD	1	9	7	9	7	ddf69ed9-4c53-48b8-9f01-495bd60c3425	NA
TCGA-AZ-4315	2006	NA	1776	NA	not hispanic or latino	male	NA	Cluster4	MSS	NA	stage iia	m0	n0	t3	white	no	r0	colon	0	61	TCGA	COAD	1	8	7	7	6	de287a25-981d-49f8-81af-fe0300e4cd31	NA
TCGA-AA-3534	2007	NA	882	NA	NA	female	0	Cluster3	MSS	0	stage iia	m0	n0	t3	NA	no	r0	colon	0	78	TCGA	COAD	1	8	6	7	5	df228c56-89ac-4122-93b3-6c0740c4ec09	NA
TCGA-DM-A28C	2001	2475	NA	NA	not hispanic or latino	male	NA	Cluster4	MSS	0	stage iia	m0	n0	t3	white	NA	NA	colon	1	74	TCGA	COAD	1	9	7	8	6	f83b909c-da90-41ed-b532-a2ef9371cff9	NA
TCGA-AA-A01T	2004	NA	1005	NA	NA	female	0	Cluster3	MSS	1	stage iii	m0	n1	t3	NA	no	r0	colon	0	63	TCGA	COAD	1	10	9	10	9	f87c6dcc-1a9e-4df5-962c-1f946e2611f8	NA
TCGA-A6-5664	2010	NA	672	NA	not hispanic or latino	male	0	Cluster4	MSS	5	stage iiic	mx	n2a	t4a	black or african american	no	NA	colon	0	80	TCGA	COAD	1	8	7	8	7	f88c0259-58ff-4bcc-a777-7705cdbd8213	NA
TCGA-D5-6530	2010	NA	621	NA	not hispanic or latino	male	NA	Cluster4	MSI-H	0	stage i	m0	n0	t2	white	no	r0	colon	0	53	TCGA	COAD	1	8	7	7	7	f89bbd17-c732-4847-b71c-a8627a702747	NA
TCGA-A6-6650	2010	NA	627	NA	not hispanic or latino	female	0	Cluster3	MSS	0	stage iia	m0	n0	t3	black or african american	no	NA	colon	0	69	TCGA	COAD	1	9	7	9	7	6cd8d2dd-5545-43b0-b796-ae0506d62eb8	NA
TCGA-AA-3488	2002	153	NA	NA	NA	male	NA	Cluster3	MSS	15	stage iv	m1	n2	t3	NA	NA	r2	colon	1	58	TCGA	COAD	1	8	7	8	6	6e9e0c2f-2ddb-40f1-8e8c-618119e62ec1	NA
TCGA-CA-6718	2010	306	NA	NA	not hispanic or latino	male	1	CIMP-H	MSS	NA	stage iia	m0	n0	t3	asian	no	rx	colon	1	46	TCGA	COAD	1	9	9	9	9	df5ab6cc-6f68-4b6b-95e2-954c6b57ba9c	NA
TCGA-AA-3660	2005	NA	2375	NA	NA	female	0	CIMP-L	MSS	0	stage ii	m0	n0	t3	NA	no	r0	colon	0	51	TCGA	COAD	1	9	7	9	7	f9b5e6a5-c2da-4a0d-9251-bb6f557b7b58	NA
TCGA-D5-6533	2010	NA	775	NA	not hispanic or latino	female	0	Cluster4	MSS	0	NA	m0	n0	t4b	white	no	r0	colon	0	68	TCGA	COAD	1	9	7	8	7	fa83dfb5-7386-4a35-9861-aa866478d5f1	NA
TCGA-AA-A00W	2008	NA	456	NA	NA	male	0	Cluster3	MSS	0	stage i	m0	n0	t1	NA	no	r0	colon	0	80	TCGA	COAD	1	10	8	9	7	fa96d094-0165-401c-8fd5-6d1ee4ef3994	NA
TCGA-AA-A01G	2009	NA	365	NA	NA	male	0	CIMP-L	MSI-L	0	stage iia	m0	n0	t3	NA	no	r0	colon	0	63	TCGA	COAD	1	10	8	9	7	6f2b5a14-569c-4084-8c67-b1a44d787897	NA
TCGA-AA-A02O	2005	NA	28	NA	NA	male	0	CIMP-H	MSS	0	stage ii	m0	n0	t3	NA	NA	r0	colon	0	82	TCGA	COAD	1	9	7	9	7	6fa41234-9077-4d05-a295-6820f3bedf5b	NA
TCGA-AZ-4681	2004	NA	3247	NA	not hispanic or latino	female	NA	Cluster3	MSS	NA	stage iia	m0	n0	t3	white	no	r0	colon	0	79	TCGA	COAD	1	10	8	9	7	6fbc2b46-6762-4778-aa7e-782162c5397c	NA
TCGA-AA-3852	2009	0	NA	NA	NA	male	0	CIMP-L	MSI-L	0	stage iia	m0	n0	t3	NA	NA	r0	colon	1	88	TCGA	COAD	1	9	8	9	7	6fc5e56a-1f5e-4ff1-948e-5ef636ebb48d	NA
TCGA-DM-A1D7	2000	405	NA	0	not hispanic or latino	male	0	Cluster4	MSS	0	stage iia	m0	n0	t3	white	NA	NA	colon	1	82	TCGA	COAD	1	9	7	9	7	fac2c617-8149-45bb-b766-fbe13dc3c425	NA
TCGA-A6-2683	2009	504	NA	NA	not hispanic or latino	female	0	CIMP-L	MSI-L	0	stage iv	m1	n0	t4	white	no	r0	colon	1	57	TCGA	COAD	1	10	8	9	8	fafd4576-0709-49e1-926f-ad1ee09907ec	NA
TCGA-AU-3779	2010	NA	441	NA	not hispanic or latino	female	0	Cluster4	MSS	0	stage iia	m0	n0	t3	white	no	r0	colon	0	80	TCGA	COAD	1	9	8	9	8	fb4cc403-694c-421f-b360-3108b6d57ad5	NA
TCGA-G4-6302	2006	2047	NA	NA	not hispanic or latino	female	1	Cluster4	MSI-H	0	stage iia	m0	n0	t3	white	no	r0	colon	1	90	TCGA	COAD	1	9	7	8	7	7144a65f-a63f-4b79-8fe2-cfe48696de03	NA
TCGA-G4-6295	2004	NA	254	NA	not hispanic or latino	female	0	Cluster3	MSI-L	0	stage ii	m0	n0	t3	white	no	NA	colon	0	70	TCGA	COAD	1	9	8	9	8	e17959bd-045d-4540-b43a-c3863e8ff3c0	NA
TCGA-CM-6680	2011	NA	366	NA	not hispanic or latino	female	0	Cluster4	MSS	4	stage iiib	m0	n2a	t3	white	no	r0	colon	0	78	TCGA	COAD	1	9	8	8	7	fb9e7684-a7f7-4f17-bc5d-1f359e1b0d42	NA
TCGA-AZ-6599	2001	206	NA	NA	not hispanic or latino	male	0	CIMP-L	MSS	0	stage i	mx	n0	t2	white	no	NA	colon	1	72	TCGA	COAD	1	10	8	9	7	fbb69964-f962-4b89-b59b-dd05f8faf61a	NA
TCGA-CM-6675	2011	NA	397	NA	not hispanic or latino	male	0	CIMP-H	MSS	12	stage ivb	m1b	n2b	t3	black or african american	no	r0	colon	0	35	TCGA	COAD	1	10	8	9	7	fce1fd5a-54d2-4260-b187-4eb7035e96e9	NA
TCGA-AA-3556	2008	NA	700	NA	NA	male	0	CIMP-L	MSS	0	stage i	m0	n0	t2	NA	no	r0	colon	0	78	TCGA	COAD	1	9	8	9	8	fd16b634-2e04-44a3-862d-fb03cd73c057	NA
TCGA-AA-3818	2007	30	NA	NA	NA	female	0	CIMP-L	MSS	0	stage iia	m0	n0	t3	NA	NA	r0	colon	1	78	TCGA	COAD	1	9	7	8	7	fdffda5f-72b2-4153-b7f1-d7043b7ca898	NA
TCGA-AA-3970	2009	NA	1096	NA	NA	male	NA	NA	MSS	0	stage iia	m0	n0	t3	NA	no	r0	colon	0	65	TCGA	COAD	1	9	8	9	8	733d8b6a-ca9d-4a69-8c9c-1f88733e8b68	NA
TCGA-AA-A02W	2006	NA	1247	NA	NA	female	0	Cluster3	MSI-L	0	stage i	m0	n0	t2	NA	no	r0	colon	0	73	TCGA	COAD	1	9	7	8	6	73448b56-a6c6-4c98-a153-ab704261e073	NA
TCGA-AA-A02J	2008	153	NA	NA	NA	female	0	Cluster3	MSS	0	stage iv	m1	n0	t3	NA	NA	r2	colon	1	70	TCGA	COAD	1	9	7	8	6	73a142e1-8ac2-4cfe-b8cf-7e9dea64f488	NA
TCGA-CK-4947	2003	NA	534	NA	not hispanic or latino	female	0	CIMP-L	MSS	3	stage iiib	m0	n1	t4	white	no	rx	colon	0	46	TCGA	COAD	1	9	8	9	8	73f9681a-f9ef-4880-bd16-93624fd117c6	NA
TCGA-A6-A56B	2008	1711	NA	NA	not hispanic or latino	male	NA	NA	NA	3	stage iiib	m0	n1	t3	black or african american	no	r0	colon	1	57	TCGA	COAD	1	8	6	7	5	74a0264d-1d31-430d-9a88-e7334c8aa96c	NA
TCGA-AA-3994	2008	NA	822	NA	NA	male	0	CIMP-H	MSS	2	stage iiib	m0	n1	t3	NA	no	r0	colon	0	69	TCGA	COAD	1	9	8	9	8	750770db-53cf-4021-a8c2-5e0ddb97fef5	NA
TCGA-CK-6747	2008	NA	2523	NA	not hispanic or latino	female	NA	CIMP-L	MSI-H	NA	stage iia	mx	n0	t3	white	no	rx	colon	0	87	TCGA	COAD	1	10	8	9	8	755d3bde-76c3-45c1-8427-8e4d5d686dc1	NA
TCGA-G4-6586	2008	NA	1089	NA	not hispanic or latino	female	1	CIMP-H	MSI-H	0	stage iia	m0	n0	t3	white	no	r0	colon	0	73	TCGA	COAD	1	8	7	8	7	7570761b-c333-40df-ac8c-9b7f94c58ef9	NA
TCGA-DM-A0X9	2001	NA	3641	NA	not hispanic or latino	female	0	CIMP-L	MSS	0	stage iia	m0	n0	t3	white	NA	NA	colon	0	71	TCGA	COAD	1	10	8	9	8	75ea63a9-357b-4566-bd78-eaa67809decd	NA
TCGA-AA-A02R	2006	670	NA	NA	NA	female	NA	CIMP-H	MSI-H	0	stage iia	m0	n0	t3	NA	NA	r0	colon	1	84	TCGA	COAD	1	9	9	9	8	764c97c9-01d3-45cb-86bd-f8a52b5468da	NA
TCGA-CM-6679	2011	NA	306	NA	not hispanic or latino	male	0	Cluster4	MSS	0	stage iia	m0	n0	t3	white	no	r0	colon	0	58	TCGA	COAD	1	9	7	8	7	76e96b5a-b565-42c7-a651-34d5132e6dde	NA
TCGA-A6-2682	2009	424	NA	NA	not hispanic or latino	male	NA	Cluster4	MSS	2	stage iv	m1	n1	t4b	white	no	r0	colon	1	70	TCGA	COAD	1	8	6	7	6	77a44132-af22-4115-9fa2-78f2f74bf687	NA
TCGA-A6-A566	2007	758	NA	NA	not hispanic or latino	female	NA	NA	NA	2	stage iiib	m0	n1	t4	black or african american	no	r0	colon	1	55	TCGA	COAD	1	7	6	7	6	790266bc-c252-43f4-85d1-1b06ee529cf8	NA
TCGA-CA-6715	2010	NA	383	NA	not hispanic or latino	male	NA	Cluster3	MSS	1	stage iiib	m0	n1	t3	asian	no	rx	colon	0	63	TCGA	COAD	1	9	7	8	6	794131b8-f4be-4f15-b3b9-6f0b10a5a38b	NA
TCGA-G4-6311	2008	NA	1199	NA	not hispanic or latino	male	0	Cluster4	MSS	1	stage iii	mx	n1	t3	white	no	r0	colon	0	80	TCGA	COAD	1	8	7	8	6	79d33c28-a7e2-4fca-8be1-a16fb6d68d49	NA
TCGA-AA-A022	2005	NA	0	NA	NA	female	1	CIMP-H	MSI-H	0	stage ii	m0	n0	t4	NA	NA	r0	colon	0	88	TCGA	COAD	1	10	10	10	10	7a481097-14a3-4916-9632-d899c25fd284	NA
TCGA-AA-3854	2009	NA	1096	NA	NA	female	0	CIMP-L	MSI-L	0	stage i	m0	n0	t2	NA	no	r0	colon	0	71	TCGA	COAD	1	9	7	8	7	7a6c54f1-f4e4-426b-b306-2ca3c4de12ca	NA
TCGA-CK-6751	2002	NA	3780	NA	not hispanic or latino	female	NA	CIMP-H	MSS	NA	stage i	mx	n0	t2	white	no	rx	colon	0	88	TCGA	COAD	1	10	8	9	8	7a70f061-9a6f-408e-a416-7f5295ceba3b	NA
TCGA-AZ-6601	2001	3042	NA	NA	not hispanic or latino	male	1	CIMP-L	MSI-H	0	stage ii	m0	n0	t3	white	no	NA	colon	1	68	TCGA	COAD	1	7	7	7	7	7ad0617e-bc4a-4869-8419-744f04d9b7a3	NA
TCGA-AA-3956	2007	NA	1035	NA	NA	male	0	CIMP-L	MSS	0	stage iia	m0	n0	t3	NA	no	r0	colon	0	65	TCGA	COAD	1	9	8	9	7	7b47489f-c3cc-4388-b5d7-c7c02790a5f6	NA
TCGA-A6-2681	2009	NA	1387	NA	not hispanic or latino	female	NA	Cluster4	MSS	0	stage iia	m0	n0	t3	white	no	r0	colon	0	73	TCGA	COAD	1	9	7	8	7	7d8eab0a-e6c8-4449-9ebf-50c41db94a06	NA
TCGA-AA-3841	2009	NA	1124	NA	NA	male	NA	Cluster3	MSS	0	stage iia	m0	n0	t3	NA	no	r0	colon	0	66	TCGA	COAD	1	9	8	9	8	7dfbc0ed-e684-4966-8b59-fb6b9e80c129	NA
TCGA-A6-2676	2009	1305	NA	NA	not hispanic or latino	female	1	CIMP-H	MSI-H	0	stage iib	m0	n0	t4	white	no	r0	colon	1	75	TCGA	COAD	1	9	9	9	9	89a6384e-1cea-440b-9f17-d57cb0805174	NA
TCGA-CK-6748	2008	NA	61	NA	not hispanic or latino	female	NA	Cluster4	MSS	NA	stage iv	m1	n1	t3	white	no	rx	colon	0	45	TCGA	COAD	1	7	6	7	5	8a84b03a-e37e-4827-98f0-4d480ec31037	NA
TCGA-CM-4752	2010	NA	396	NA	not hispanic or latino	male	0	Cluster4	MSS	0	stage iia	m0	n0	t3	black or african american	no	r0	colon	0	58	TCGA	COAD	1	10	9	10	9	7ea546ce-f48a-4d9c-96b4-a0124c692870	NA
TCGA-WS-AB45	2008	NA	2130	NA	not hispanic or latino	female	NA	NA	Indeterminate	0	stage iia	mx	n0	t3	black or african american	no	rx	colon	0	NA	TCGA	COAD	1	6	6	6	6	7f6898e2-a840-4ad1-80f7-783f8b766fcc	NA
TCGA-AD-6895	2011	NA	763	NA	not hispanic or latino	male	1	Cluster4	MSI-H	1	stage iiib	m0	n1a	t3	white	no	r0	colon	0	84	TCGA	COAD	1	10	9	9	9	4f601d7b-8db1-4c6d-9374-21dcd804980d	NA
TCGA-AA-3844	2009	NA	454	NA	NA	female	0	Cluster3	MSS	7	stage iiic	m0	n2	t3	NA	yes	r0	colon	0	78	TCGA	COAD	1	10	8	9	8	4f786107-3cf5-4ab3-bba4-f399dee23f0e	NA
TCGA-A6-3808	2009	NA	1014	NA	not hispanic or latino	male	0	Cluster3	MSI-L	0	stage iia	m0	n0	t3	white	no	r0	colon	0	73	TCGA	COAD	1	9	8	9	8	4f9775f2-b663-4daf-aa9e-50915cae9407	NA
TCGA-AA-3842	2009	NA	1126	NA	NA	male	0	CIMP-L	MSS	2	stage iiia	m0	n1	t2	NA	no	r0	colon	0	51	TCGA	COAD	1	9	8	9	7	80311cf5-7e18-4545-92ad-c4b7dd5c9677	NA
TCGA-CM-6163	2010	NA	427	NA	not hispanic or latino	male	0	Cluster4	MSS	0	stage i	m0	n0	t1	white	no	r0	colon	0	74	TCGA	COAD	1	9	7	8	7	8c043ecd-2265-411f-bc3b-dc341cf56ac2	NA
TCGA-DM-A1HB	2000	NA	4126	3786	not hispanic or latino	male	NA	CIMP-H	MSI-H	1	stage iiib	m0	n1	t3	white	NA	NA	colon	0	75	TCGA	COAD	1	7	6	7	5	8c0894fb-5e78-40ae-be0b-329ca30f758a	NA
TCGA-AA-A01C	2009	NA	457	NA	NA	male	NA	Cluster3	MSS	3	stage iiia	m0	n1	t2	NA	no	r0	colon	0	75	TCGA	COAD	1	9	8	9	7	80809d79-92e1-4d6c-ba2e-0a9589997792	NA
TCGA-AA-3509	2005	NA	1915	NA	NA	female	NA	Cluster4	MSS	0	stage ii	m0	n0	t3	NA	no	r0	colon	0	54	TCGA	COAD	1	8	7	8	6	80e677b1-5ebe-4069-a1a5-1538ffee6642	NA
TCGA-AA-3939	2009	NA	395	NA	NA	male	0	Cluster3	MSS	0	stage iia	m0	n0	t3	NA	no	r0	colon	0	83	TCGA	COAD	1	9	7	9	7	81555ac5-9cc2-49ae-9033-657f56243f20	NA
TCGA-T9-A92H	2013	NA	362	NA	not hispanic or latino	male	NA	NA	Indeterminate	NA	stage iia	m0	n0	t3	black or african american	no	r0	colon	0	82	TCGA	COAD	1	10	9	10	8	81a7184e-f9f5-4e3f-9603-5f5642386c1e	NA
TCGA-A6-6654	2011	NA	726	NA	not hispanic or latino	female	0	CIMP-L	MSS	1	stage iiib	m0	n1	t3	white	no	NA	colon	0	65	TCGA	COAD	1	7	7	7	7	81e7cca8-2d71-4446-9692-872c2fe68d0a	NA
TCGA-AA-3930	2008	61	NA	NA	NA	male	0	CIMP-L	MSI-L	24	stage iv	m1	n2	t3	NA	no	r2	colon	1	66	TCGA	COAD	1	9	8	9	7	81f6b141-2195-4091-9cd3-dfb022663949	NA
TCGA-A6-3807	2009	NA	1054	NA	not hispanic or latino	female	0	Cluster3	MSS	5	stage iiic	m0	n2	t3	white	no	r0	colon	0	53	TCGA	COAD	1	10	9	9	8	5116e3b4-2bac-40f5-8046-b9c1783faaa5	NA
TCGA-NH-A6GA	2013	302	NA	NA	not hispanic or latino	male	NA	NA	Indeterminate	4	stage iiic	mx	n2a	t4a	black or african american	no	r0	colon	1	58	TCGA	COAD	1	9	7	9	7	51dcbfac-6f04-4364-877d-0bf1bd566335	NA
TCGA-SS-A7HO	2010	NA	1829	NA	not hispanic or latino	female	NA	NA	Indeterminate	0	stage iib	m0	n0	t4a	black or african american	no	r0	colon	0	44	TCGA	COAD	1	6	5	6	5	8d0fa506-3f51-4108-8427-7dabf270bcd4	NA
TCGA-CM-6169	2010	NA	396	NA	not hispanic or latino	male	NA	Cluster4	MSS	0	stage iia	m0	n0	t3	black or african american	no	r0	colon	0	67	TCGA	COAD	1	8	7	8	7	8e87ddca-f43e-4c6f-9d5b-430b666a7f6c	NA
TCGA-AA-3941	2010	NA	730	NA	NA	female	0	CIMP-H	MSI-L	3	stage iva	m1a	n1b	t4	NA	no	r0	colon	0	84	TCGA	COAD	1	9	7	9	7	835c3e23-ac2b-4bc9-ac65-e3e81adecf77	NA
TCGA-CK-4952	2007	NA	475	NA	not hispanic or latino	female	0	CIMP-H	MSS	5	stage iiic	m0	n2	t4	white	NA	rx	colon	0	48	TCGA	COAD	1	7	6	7	5	5342e2e8-1465-4f7b-9450-ef27280f80c7	NA
TCGA-AA-3875	2007	NA	549	NA	NA	female	0	Cluster3	MSS	0	stage i	m0	n0	t1	NA	no	r0	colon	0	78	TCGA	COAD	1	9	7	8	7	5498d5ef-ad24-4034-9750-7c996c5355e1	NA
TCGA-CM-6674	2011	NA	394	NA	not hispanic or latino	male	1	Cluster4	MSI-H	0	stage iia	m0	n0	t3	white	no	r0	colon	0	39	TCGA	COAD	1	9	8	9	7	55697871-b9aa-4acd-8dbe-dcd5391db8f0	NA
TCGA-CA-5255	2010	NA	376	NA	not hispanic or latino	male	NA	CIMP-L	MSS	NA	stage iia	m0	n0	t3	asian	yes	rx	colon	0	45	TCGA	COAD	1	10	8	9	8	563d67a1-f1ba-4722-aa2d-9b35b1689468	NA
TCGA-A6-2671	2009	1331	NA	NA	not hispanic or latino	male	0	Cluster4	MSS	3	stage iv	m1	n2	t3	white	no	r0	colon	1	85	TCGA	COAD	1	8	7	8	7	565e2726-4942-4726-89d3-c5e3797f7204	NA
TCGA-G4-6304	2006	NA	1631	NA	not hispanic or latino	female	0	Cluster4	MSI-H	0	stage iib	m0	n0	t4	white	no	r0	colon	0	66	TCGA	COAD	1	9	8	9	7	567ddc8e-2b00-417d-a326-479cb02e08dd	NA
TCGA-G4-6307	2007	NA	1674	NA	not hispanic or latino	female	NA	Cluster4	MSS	2	stage iiib	m0	n1	t3	white	no	r0	colon	0	37	TCGA	COAD	1	8	6	8	6	568dbda7-88b5-4330-881f-dc5d6c7ce4ae	NA
TCGA-DM-A1HA	2000	NA	4000	3924	not hispanic or latino	male	NA	CIMP-L	MSS	4	stage iiic	m0	n2	t3	white	NA	NA	colon	0	82	TCGA	COAD	1	10	9	10	8	56c8b812-ca8e-4eb2-b0fe-f264316789bf	NA
TCGA-AZ-6603	2002	899	NA	NA	not hispanic or latino	female	0	Cluster4	MSS	0	NA	mx	n1	t2	white	no	NA	colon	1	77	TCGA	COAD	1	9	7	8	7	56d5b0b9-9093-4286-a2c6-7faa9a1680f5	NA
TCGA-AA-A00J	2009	NA	549	NA	NA	male	1	CIMP-H	MSI-H	2	stage iiib	m0	n1	t4	NA	no	r0	colon	0	80	TCGA	COAD	1	7	6	7	5	56e612e8-2c29-4782-be79-2813cc8dd2e6	NA
TCGA-CM-4747	2010	NA	761	NA	not hispanic or latino	male	0	CIMP-L	MSI-L	2	stage iva	m1a	n1b	t4a	white	no	r0	colon	0	47	TCGA	COAD	1	8	7	8	6	56eb96a4-d2c2-42fb-b26c-1a80012bcb8e	NA
TCGA-CK-5914	2008	NA	669	NA	not hispanic or latino	male	0	CIMP-L	MSS	NA	stage iiib	mx	n1	t3	white	NA	rx	colon	0	81	TCGA	COAD	1	10	9	10	8	57b0f89f-1b75-453e-922c-01cd4d44ca49	NA
TCGA-A6-2674	2009	NA	1331	NA	not hispanic or latino	male	0	Cluster3	MSS	7	stage iv	m1	n2	t3	white	no	r0	colon	0	71	TCGA	COAD	1	8	8	8	7	57cdaa1c-4e94-4a28-ab3b-300c0457555f	NA
TCGA-A6-6141	2011	NA	255	NA	not hispanic or latino	male	1	Cluster4	MSS	0	stage iia	m0	n0	t3	black or african american	no	NA	colon	0	31	TCGA	COAD	1	9	8	8	7	58facedb-fcb8-4ecf-8338-2bfa4947acef	NA
TCGA-AA-3982	2009	NA	822	NA	NA	male	0	Cluster3	MSI-L	3	stage iiib	m0	n1	t3	NA	no	NA	colon	0	75	TCGA	COAD	1	9	8	9	7	5a195baa-2d05-4273-a7c4-64cc816b0406	NA
TCGA-CM-5864	2010	NA	457	NA	not hispanic or latino	male	0	CIMP-L	MSS	0	stage i	m0	n0	t2	white	no	r0	colon	0	60	TCGA	COAD	1	9	8	9	7	5b259d18-3976-4f44-967f-fe5fa8447c8b	NA
TCGA-AA-3955	2010	NA	638	NA	NA	male	0	Cluster3	MSS	5	stage iiib	m0	n2a	t2	NA	no	r0	colon	0	38	TCGA	COAD	1	9	7	8	7	5c24435e-8e50-42c2-80c7-919b1cad0133	NA
TCGA-D5-6931	2011	NA	365	NA	not hispanic or latino	male	NA	CIMP-L	MSS	4	stage iiic	m0	n2	t4b	white	no	r0	colon	0	77	TCGA	COAD	1	9	8	8	7	5d66191d-da49-4d7e-89a4-a382db338340	NA
TCGA-CK-4948	2002	NA	4502	NA	not hispanic or latino	female	NA	Cluster4	MSI-L	3	stage iii	m0	n1	t3	white	no	r0	colon	0	45	TCGA	COAD	1	8	6	8	6	5d73b382-3da3-4220-890e-2095228bbe6c	NA
TCGA-AA-3861	2009	NA	914	NA	NA	male	NA	CIMP-L	MSI-L	0	stage iia	m0	n0	t3	NA	no	r0	colon	0	72	TCGA	COAD	1	10	8	9	8	5da56982-6de7-4994-aa9e-3b01200b2959	NA
TCGA-AD-6964	2011	331	NA	NA	not hispanic or latino	male	1	Cluster4	MSI-H	0	NA	NA	n2b	t4a	white	no	NA	colon	1	58	TCGA	COAD	1	8	8	8	8	5e7074a6-5011-4dc5-950c-41365dbc6d09	NA
TCGA-G4-6625	2004	NA	2792	NA	not hispanic or latino	female	0	Cluster4	MSS	0	stage iia	m0	n0	t3	white	no	r0	colon	0	77	TCGA	COAD	1	9	9	9	9	5eed7e8a-c219-4497-a99f-bfc48faca4d8	NA
TCGA-AA-3520	2007	NA	731	NA	NA	female	0	Cluster3	MSI-L	0	stage ii	m0	n0	t3	NA	no	r0	colon	0	86	TCGA	COAD	1	9	8	9	7	5f1399ef-8100-49e7-806f-9f532e55c0ba	NA
TCGA-RU-A8FL	2011	NA	1177	NA	not hispanic or latino	male	NA	NA	Indeterminate	5	stage iiib	mx	n2a	t3	black or african american	no	r0	colon	0	51	TCGA	COAD	1	10	8	9	7	5f6ed48b-3b5a-4d20-8fbf-c9aa3feea186	NA
TCGA-AM-5821	2010	NA	28	NA	not hispanic or latino	female	1	CIMP-H	MSI-H	NA	stage iia	m0	n0	t3	white	NA	r0	colon	0	68	TCGA	COAD	1	8	9	8	8	605baa86-79e3-484d-82d2-4de27d405ba1	NA
TCGA-AA-A00F	2007	NA	1035	NA	NA	male	0	Cluster3	MSS	7	stage iiic	m0	n2	t3	NA	no	r0	colon	0	66	TCGA	COAD	1	9	7	8	7	60ad2c8a-6bbf-43fc-ae73-cc1f6d6c163c	NA
TCGA-AD-A5EJ	2012	NA	0	NA	not hispanic or latino	female	NA	NA	NA	0	stage iia	mx	n0	t3	black or african american	NA	r0	colon	0	74	TCGA	COAD	1	6	5	6	5	613aa3e8-a70b-45a9-9c08-0c2346c8bf00	NA
TCGA-G4-6297	2005	NA	2506	NA	not hispanic or latino	female	0	Cluster4	MSS	6	stage iv	m1	n2	t3	white	no	r0	colon	0	55	TCGA	COAD	1	9	8	9	8	622cc1c4-d721-4b5c-a88b-216d6368660b	NA
TCGA-AA-3673	2006	NA	1522	NA	NA	female	0	CIMP-L	MSS	0	stage ii	m0	n0	t3	NA	no	r0	colon	0	53	TCGA	COAD	1	9	7	8	7	628408ce-0691-4e0b-b4c7-aca9a0d73bb0	NA
TCGA-AA-A00Q	2008	NA	1278	NA	NA	female	0	CIMP-L	MSS	1	stage iiib	m0	n1	t4	NA	no	r0	colon	0	66	TCGA	COAD	1	9	7	8	7	62d39be5-f029-4eb8-8b00-46470e06a755	NA
TCGA-AA-3496	2002	NA	31	NA	NA	female	NA	CIMP-L	MSI-L	0	stage ii	m0	n0	t3	NA	NA	r0	colon	0	83	TCGA	COAD	1	8	8	8	7	639e1050-088a-48fe-a0ef-4a01a3468cac	NA
TCGA-NH-A8F7	2013	NA	543	NA	not hispanic or latino	female	NA	NA	Indeterminate	0	stage iia	mx	n0	t3	black or african american	yes	r0	colon	0	53	TCGA	COAD	1	8	6	8	6	6454ff0c-26f8-4cc2-b77c-7e5abdc20acd	NA
TCGA-D5-6929	2011	NA	408	NA	not hispanic or latino	female	NA	CIMP-L	MSI-L	1	stage iv	m1	n1	t3	white	no	r0	colon	0	49	TCGA	COAD	1	10	8	9	8	64b0461f-038d-4712-948e-818dc2f10eef	NA
TCGA-F4-6856	2011	NA	1074	NA	not hispanic or latino	male	1	Cluster4	MSI-H	0	stage i	m0	n0	t2	white	no	r0	colon	0	45	TCGA	COAD	1	10	8	9	8	64bd568d-0509-48fe-8d0a-aef2a85d5c57	NA
TCGA-AZ-6607	2009	97	NA	NA	not hispanic or latino	male	0	CIMP-L	MSS	5	stage iv	m1	n2	t4	white	no	NA	colon	1	69	TCGA	COAD	1	7	7	7	7	64dcf1a5-c78c-4d3f-852c-15865b3b6189	NA
TCGA-A6-6648	2010	NA	766	NA	not hispanic or latino	male	0	Cluster4	MSS	0	stage iva	m1a	n0	t3	white	no	NA	colon	0	56	TCGA	COAD	1	9	8	9	7	65056295-8fcd-4f82-a3c9-a5acd79521fe	NA
TCGA-AA-3947	2009	NA	1004	NA	NA	female	1	CIMP-H	MSI-H	0	stage iib	m0	n0	t4	NA	no	r0	colon	0	60	TCGA	COAD	1	6	5	6	5	654c6f5c-3e5c-49f0-b53f-87cd9797d7c9	NA
TCGA-CA-5796	2010	NA	377	NA	not hispanic or latino	female	0	CIMP-L	MSS	NA	stage iia	m0	n0	t3	asian	no	r0	colon	0	52	TCGA	COAD	1	10	8	9	8	65ab030d-39f2-48ab-80ac-90cb1faa823a	NA
TCGA-DM-A280	1998	236	NA	NA	not hispanic or latino	female	NA	Cluster4	MSS	0	stage iia	m0	n0	t3	white	NA	NA	colon	1	70	TCGA	COAD	1	9	7	8	7	6775ce57-b4cf-425c-a898-061bb9a8a1a8	NA
TCGA-AA-3494	2002	NA	31	NA	NA	male	NA	Cluster4	MSS	0	stage iv	m1	n0	t3	NA	NA	r2	colon	0	55	TCGA	COAD	1	8	7	8	6	67ba29e7-f294-4dcd-9630-ad768c22c588	NA
TCGA-A6-6653	2011	NA	742	NA	not hispanic or latino	male	1	CIMP-H	MSI-H	0	stage i	m0	n0	t2	white	no	NA	colon	0	82	TCGA	COAD	1	10	9	10	8	68801d41-535f-4b38-989b-ef4fe5f00039	NA
TCGA-AA-A02H	2007	61	NA	NA	NA	female	0	Cluster3	MSS	6	stage iv	m1	n2	t3	NA	NA	r2	colon	1	74	TCGA	COAD	1	9	7	9	7	69fb431f-0caf-4cdd-9085-eda5b18ed15d	NA
TCGA-F4-6809	2011	403	NA	NA	not hispanic or latino	female	0	Cluster4	MSS	3	stage iva	m1	n1	t3	white	no	r0	colon	1	52	TCGA	COAD	1	9	8	9	7	e7af286b-3dec-4cf2-8fbd-fa64b3efdf7f	NA
TCGA-G4-6321	2009	NA	672	NA	not hispanic or latino	female	0	CIMP-H	MSI-L	3	stage iii	mx	n1	t2	white	no	r0	colon	0	60	TCGA	COAD	1	10	9	10	9	e7dbfca1-9657-4952-8e0d-dec6373dda5b	NA
TCGA-AA-3544	2008	NA	426	NA	NA	male	0	Cluster3	MSS	0	stage i	m0	n0	t2	NA	no	r0	colon	0	68	TCGA	COAD	1	9	8	9	8	e831369c-78c0-4c75-9cf3-f46ed669312e	NA
TCGA-D5-6536	2010	NA	543	NA	not hispanic or latino	male	0	Cluster4	MSS	0	stage iia	m0	n0	t3	white	no	r0	colon	0	73	TCGA	COAD	1	8	6	8	6	e83e5700-f968-4978-bb78-56a83936ce8c	NA
TCGA-AD-6890	2010	NA	746	NA	NA	male	0	CIMP-H	MSS	0	NA	mx	n0	t1	white	no	NA	colon	0	65	TCGA	COAD	1	9	8	9	8	e8e80df9-e3ba-4dec-b8fc-a5e80d8c6798	NA
TCGA-AD-A5EK	2012	NA	500	NA	not hispanic or latino	male	NA	NA	NA	0	stage i	mx	n0	t2	black or african american	no	r0	colon	0	51	TCGA	COAD	1	9	7	8	6	e8ec26bd-c88d-42b9-ac8a-ab121b8140f8	NA
TCGA-AA-3855	2009	NA	975	NA	NA	male	0	CIMP-L	MSI-L	0	stage i	m0	n0	t2	NA	no	r0	colon	0	72	TCGA	COAD	1	10	8	9	8	b4c3cf95-a27c-4bcf-9321-38723473e83b	NA
TCGA-A6-6781	2011	NA	598	NA	not hispanic or latino	male	1	Cluster4	MSI-H	2	stage iiic	mx	n1b	t4b	white	no	r0	colon	0	43	TCGA	COAD	1	8	7	7	7	b54865b6-824e-4163-b759-21a6eacc98ce	NA
TCGA-A6-2672	2009	NA	1419	NA	not hispanic or latino	female	1	CIMP-H	MSI-H	1	stage iiib	m0	n1	t3	white	no	r0	colon	0	82	TCGA	COAD	1	8	8	8	8	b612d491-7442-4119-a53c-5ebcc35c31f4	NA
TCGA-CM-5344	2010	NA	670	NA	hispanic or latino	female	0	Cluster4	MSS	3	stage iiib	m0	n1b	t3	white	no	r0	colon	0	39	TCGA	COAD	1	9	7	8	6	b6202d8d-dd3c-4fa2-9242-6e55759846af	NA
TCGA-G4-6317	2008	NA	1095	NA	not hispanic or latino	female	0	Cluster4	MSI-L	6	stage iiic	mx	n2	t3	white	no	r0	colon	0	51	TCGA	COAD	1	9	7	8	7	cee553c8-460d-436b-b55d-8f41624816cc	NA
TCGA-AA-3558	2008	NA	638	NA	NA	male	0	CIMP-L	MSS	0	stage i	m0	n0	t2	NA	no	r2	colon	0	70	TCGA	COAD	0	NA	NA	NA	NA	a56d528b-238a-4556-92c8-7645304a2da0	NA
TCGA-DM-A0XD	2000	743	NA	NA	not hispanic or latino	male	0	CIMP-H	MSI-L	0	stage iia	m0	n0	t3	white	NA	NA	colon	1	65	TCGA	COAD	1	10	8	9	7	a56f6562-d2af-47b9-bf81-94b3b4893173	NA
TCGA-4T-AA8H	2013	NA	385	NA	not hispanic or latino	female	NA	NA	Indeterminate	0	stage iia	mx	n0	t3	black or african american	no	r0	colon	0	42	TCGA	COAD	1	9	7	9	7	a5e14add-1552-4606-9ffe-3a03bcf76640	NA
TCGA-AD-6899	2011	176	NA	NA	NA	male	0	Cluster4	MSS	17	stage iiic	mx	n2b	t4a	white	no	NA	colon	1	84	TCGA	COAD	1	9	8	8	7	ea923671-3903-4a79-830d-e7e4b1eabab0	NA
TCGA-DM-A1D6	2000	1518	NA	1518	not hispanic or latino	male	0	Cluster4	MSS	0	stage iia	m0	n0	t3	white	NA	NA	colon	1	88	TCGA	COAD	1	10	8	9	7	eb191e71-4b6e-4c8d-8348-519be5a1e657	NA
TCGA-AZ-5407	2007	NA	2683	NA	not hispanic or latino	female	0	CIMP-H	MSS	0	stage i	m0	n0	t1	white	no	NA	colon	0	51	TCGA	COAD	1	9	7	9	7	b718134c-5231-4f29-a423-7bad17c93fc5	NA
TCGA-A6-3810	2009	NA	1111	NA	not hispanic or latino	male	0	Cluster3	MSS	0	stage iia	m0	n0	t3	white	no	r0	colon	0	62	TCGA	COAD	1	9	8	9	7	b728e6e8-a0e4-496b-904c-6f07c12e901f	NA
TCGA-AD-6901	2011	682	NA	NA	NA	male	0	CIMP-L	MSI-L	0	NA	mx	n0	t3	white	no	NA	colon	1	78	TCGA	COAD	1	8	7	8	7	b76d1de7-6447-474d-bf67-77e0bb2da73a	NA
TCGA-DM-A0XF	1999	1162	NA	NA	not hispanic or latino	female	0	Cluster4	MSI-L	4	stage iiic	m0	n2	t3	white	NA	NA	colon	1	68	TCGA	COAD	1	9	7	8	7	b823d6e5-54b0-43d3-95e2-9be33dc6f734	NA
TCGA-CM-5348	2010	NA	699	NA	not hispanic or latino	male	0	Cluster4	MSS	1	stage iiib	m0	n1a	t3	white	no	r0	colon	0	72	TCGA	COAD	1	8	6	7	6	b89267a4-0e6b-401e-85b0-e66775858aa6	NA
TCGA-AA-3679	2006	NA	457	NA	NA	male	0	Cluster3	MSS	5	stage iv	m1	n2	t3	NA	no	r2	colon	0	59	TCGA	COAD	1	10	8	9	7	d17a2ab0-faef-40de-a87d-1291868b200d	NA
TCGA-AA-3553	2008	NA	730	NA	NA	female	0	Cluster3	MSI-L	0	stage i	m0	n0	t2	NA	no	r0	colon	0	61	TCGA	COAD	1	9	8	9	8	d181c72b-843c-4b2d-b014-2a6dd1c3c1ec	NA
TCGA-NH-A50U	2012	334	NA	NA	not hispanic or latino	male	NA	NA	Indeterminate	0	stage iva	m1a	n0	t4a	black or african american	no	r0	colon	1	42	TCGA	COAD	1	9	7	8	7	9d68516e-7e5c-403e-8aca-ea1abe0d6014	NA
TCGA-CM-6170	2010	NA	457	NA	not hispanic or latino	female	0	Cluster4	MSS	0	stage i	m0	n0	t2	white	no	r0	colon	0	73	TCGA	COAD	1	8	7	8	7	9d8c4693-8e36-473b-bb34-a7cdc04dd223	NA
TCGA-AA-3542	2008	NA	395	NA	NA	male	0	Cluster3	MSS	4	stage iiic	m0	n2	t3	NA	no	r0	colon	0	69	TCGA	COAD	1	8	6	8	6	9dcb4e16-b582-4cd0-87cf-04f480ec2cec	NA
TCGA-AA-3521	2007	NA	NA	NA	NA	male	0	Cluster3	MSS	0	stage ii	m0	n0	t3	NA	NA	r0	colon	0	87	TCGA	COAD	1	8	7	8	6	ad440651-a2de-4bb1-90da-1e5e8975ab59	NA
TCGA-D5-6534	2010	NA	1316	NA	not hispanic or latino	female	0	Cluster4	MSS	0	stage iia	m0	n0	t3	white	no	r0	colon	0	62	TCGA	COAD	1	8	8	8	8	d259eeb2-d15e-436d-9d37-2d0b7658bc91	NA
TCGA-AA-A004	2009	NA	424	NA	NA	male	0	CIMP-L	MSI-L	0	stage iia	m0	n0	t3	NA	no	r0	colon	0	76	TCGA	COAD	1	10	9	10	9	d2c99bed-3446-4d12-99e0-00611faa37dc	NA
TCGA-D5-6537	2010	146	NA	NA	not hispanic or latino	male	0	Cluster4	MSS	1	stage iiib	mx	n1a	t3	white	no	r0	colon	1	64	TCGA	COAD	1	8	7	8	6	ebc5a6f8-34fd-48c1-a2b9-7f60f45fbf27	NA
TCGA-CM-6162	2010	NA	365	NA	not hispanic or latino	female	1	Cluster4	MSI-H	1	stage iiib	m0	n1a	t3	white	no	r0	colon	0	48	TCGA	COAD	1	8	8	8	7	ec3f3f11-75df-4fcc-ba03-f19aca907645	NA
TCGA-AA-3489	2002	214	NA	NA	NA	male	0	Cluster4	MSS	0	stage ii	m0	n0	t3	NA	no	r0	colon	1	75	TCGA	COAD	1	8	8	8	7	b95720b1-aa00-4c6a-b202-3350d035829f	NA
TCGA-D5-5537	2010	1381	NA	NA	not hispanic or latino	male	0	Cluster4	MSS	7	stage iia	mx	n2	t3	white	no	rx	colon	1	83	TCGA	COAD	1	10	8	9	7	ae6b315f-3f78-4695-adfa-48b0bbab2c89	NA
TCGA-CM-4750	2010	NA	244	NA	not hispanic or latino	female	NA	Cluster4	MSI-L	2	stage iiia	m0	n1b	t1	white	no	r0	colon	0	34	TCGA	COAD	1	10	9	10	8	c777a777-373a-4773-9566-6c373261f00a	NA
TCGA-A6-6142	2011	NA	763	NA	not hispanic or latino	female	0	Cluster4	MSS	1	stage iva	m1a	n1a	t3	white	no	NA	colon	0	56	TCGA	COAD	1	8	6	7	6	c7c5348f-5708-45bf-b40e-1bf7c9348f60	NA
TCGA-AA-3554	2008	NA	546	NA	NA	female	1	Cluster3	MSI-H	0	stage iia	m0	n0	t3	NA	no	r0	colon	0	62	TCGA	COAD	1	8	8	8	7	ba49b428-246d-46d2-b549-39a5fc8f7003	NA
TCGA-F4-6806	2011	NA	1260	NA	not hispanic or latino	female	0	CIMP-L	MSS	0	stage i	m0	n0	t2	white	no	r0	colon	0	59	TCGA	COAD	1	10	9	10	8	bab21810-f51b-421e-a87f-1f1136cbc77a	NA
TCGA-F4-6569	2011	NA	1087	NA	not hispanic or latino	male	0	Cluster4	MSS	0	stage i	m0	n0	t2	white	no	r0	colon	0	60	TCGA	COAD	1	9	7	8	7	d3062aac-4c42-41b4-a9f3-90aa72e6fb1e	NA
TCGA-NH-A50V	2012	NA	588	NA	not hispanic or latino	male	NA	NA	NA	4	stage iiib	m0	n2a	t3	black or african american	no	r0	colon	0	69	TCGA	COAD	1	8	7	8	7	d3b7ada6-5395-4212-a921-8e97c92b605d	NA
TCGA-AA-3864	2005	NA	1612	NA	NA	male	1	Cluster3	MSI-H	0	stage ii	m0	n0	t3	NA	no	r0	colon	0	71	TCGA	COAD	1	8	7	8	6	c82bbe23-0264-45a7-b1a6-82b4654108c8	NA
TCGA-QG-A5YV	2011	NA	1301	NA	not hispanic or latino	female	NA	NA	NA	1	stage iiic	mx	n1a	t4b	black or african american	no	r0	colon	0	64	TCGA	COAD	1	9	7	8	7	c83d38fc-e011-4f75-a100-96513611f3e9	NA
TCGA-AZ-6606	2009	357	NA	NA	not hispanic or latino	male	NA	CIMP-H	MSS	10	stage iv	m1	n2	t4	white	no	NA	colon	1	81	TCGA	COAD	1	10	8	9	8	c8d6fe73-3504-42a5-9723-e1916fba8208	NA
TCGA-CM-4743	2010	NA	701	NA	not hispanic or latino	male	1	CIMP-H	MSI-H	0	stage iia	m0	n0	t3	white	no	r0	colon	0	69	TCGA	COAD	1	10	10	10	10	c8d7eb0f-2502-4277-a8ef-435b08f3c863	NA
TCGA-AD-6965	2011	NA	805	NA	not hispanic or latino	male	0	CIMP-L	MSS	11	stage iiic	m0	n2b	t4a	white	no	r1	colon	0	62	TCGA	COAD	1	9	8	9	7	c8de215d-53a4-4e6c-be58-5887a8094815	NA
TCGA-CM-6167	2010	NA	456	NA	not hispanic or latino	female	NA	Cluster4	MSS	11	stage iiic	m0	n2b	t3	black or african american	no	r0	colon	0	57	TCGA	COAD	1	9	7	8	7	d42bc7f0-cfb2-4ece-ae47-521308635633	NA
TCGA-QG-A5YW	2011	NA	896	NA	not hispanic or latino	female	NA	NA	Indeterminate	11	stage iiic	mx	n2b	t3	black or african american	no	r0	colon	0	55	TCGA	COAD	1	9	8	9	7	9f45a227-1fd5-478c-a194-4a5c61b68cc3	NA
TCGA-AA-A01D	2009	334	NA	NA	NA	female	0	CIMP-L	MSS	12	stage iiic	m0	n2	t3	NA	no	r0	colon	1	47	TCGA	COAD	1	7	5	7	5	e2edbf3f-25d8-49aa-b656-2a59c3b99aeb	NA
TCGA-F4-6570	2011	188	NA	NA	not hispanic or latino	female	1	CIMP-H	MSI-H	0	stage iia	m0	n0	t3	white	no	r0	colon	1	78	TCGA	COAD	1	8	7	7	7	eeb42912-0c7a-46bb-bd95-369b2b425727	NA
TCGA-D5-6928	2011	NA	354	NA	not hispanic or latino	male	1	Cluster4	MSI-H	0	stage iia	m0	n0	t3	white	no	r0	colon	0	80	TCGA	COAD	1	8	9	8	9	eecaa5cd-0b69-4af2-a782-035025f207b6	NA
TCGA-CM-6171	2010	NA	427	NA	not hispanic or latino	female	1	CIMP-H	MSI-H	0	stage i	m0	n0	t2	white	no	r0	colon	0	77	TCGA	COAD	1	8	6	7	6	eed7405f-f8f3-41a4-a0e7-242f23087f59	NA
TCGA-AA-3845	2009	0	NA	NA	NA	female	1	CIMP-H	MSI-H	0	stage iia	m0	n0	t3	NA	NA	r0	colon	1	86	TCGA	COAD	1	9	9	8	9	bc02f801-081b-489b-87cb-d275c70299d5	NA
TCGA-AA-3966	2009	NA	61	NA	NA	female	1	CIMP-L	MSI-H	0	stage iia	m0	n0	t3	NA	NA	NA	colon	0	89	TCGA	COAD	1	7	6	7	6	bc42fe2d-1a33-428d-a601-b1871f4c8d9b	NA
TCGA-F4-6857	NA	NA	NA	NA	NA	NA	NA	NA	NA	NA	NA	NA	NA	NA	NA	NA	NA	NA	NA	NA	TCGA	COAD	0	NA	NA	NA	NA	e2fca12c-1a5a-4ba7-9233-d31560fc43be	NA
TCGA-AA-3715	2006	579	NA	NA	NA	male	1	CIMP-H	MSI-H	0	stage ii	m0	n0	t3	NA	no	r0	colon	1	77	TCGA	COAD	1	9	9	9	9	e394e9ec-7288-4ede-9ef8-41b631d100dd	NA
TCGA-NH-A6GB	2013	NA	476	NA	not hispanic or latino	female	NA	NA	NA	7	stage iiic	mx	n2b	t3	black or african american	no	r0	colon	0	71	TCGA	COAD	1	10	8	9	8	e3b0ee77-c419-4b2b-833f-90a221415489	NA
TCGA-DM-A28H	2002	NA	3561	NA	not hispanic or latino	male	0	CIMP-L	MSI-L	8	stage iiic	m0	n2	t3	white	NA	NA	colon	0	50	TCGA	COAD	1	7	6	7	5	aec0c661-afac-4f7a-8c31-154d743f2499	NA
TCGA-AZ-6600	2001	368	NA	NA	not hispanic or latino	male	0	CIMP-L	MSS	1	stage iv	m1	n1	t4	black or african american	no	NA	colon	1	64	TCGA	COAD	1	9	8	9	7	aee20b98-df51-4ead-86cc-0d5f60a74b90	NA
TCGA-AA-A017	2009	NA	457	NA	NA	female	0	Cluster3	MSS	0	stage iia	m0	n0	t3	NA	no	r0	colon	0	57	TCGA	COAD	1	8	6	8	6	af06cde0-c69a-4bb1-a234-8023b95e4835	NA
TCGA-AA-3979	2010	NA	730	NA	NA	male	0	CIMP-L	MSS	0	stage iia	m0	n0	t3	NA	no	r0	colon	0	84	TCGA	COAD	1	9	8	9	7	af17788e-a562-43aa-bd36-fd3e031f483c	NA
TCGA-AA-A00Z	2008	NA	669	NA	NA	male	0	Cluster3	MSS	0	stage iia	m0	n0	t3	NA	no	r0	colon	0	70	TCGA	COAD	1	9	8	9	7	af3a0634-4292-45bd-b948-6b6bd2d58090	NA
TCGA-AA-3692	2008	1095	NA	NA	NA	female	0	Cluster3	MSI-L	5	stage iv	m1	n2	t3	NA	yes	r2	colon	1	47	TCGA	COAD	1	8	7	8	6	bce3ce45-4fb3-4d8e-9ec7-d24427c2ba4d	NA
TCGA-AA-3831	2008	NA	547	NA	NA	male	0	CIMP-L	MSS	0	stage iia	m0	n0	t3	NA	no	r0	colon	0	66	TCGA	COAD	1	8	6	7	6	bce5579c-08c6-48e9-853e-fac85ba8cbea	NA
TCGA-AY-A71X	2013	NA	588	NA	not hispanic or latino	female	NA	NA	Indeterminate	0	stage i	m0	n0	t2	black or african american	no	r0	colon	0	54	TCGA	COAD	1	9	7	9	7	d4da3298-3a02-44a6-bdcd-d260f38e520b	NA
TCGA-AA-A024	2005	1188	NA	NA	NA	male	0	Cluster3	MSI-L	0	stage ii	m0	n0	t3	NA	no	r0	colon	1	81	TCGA	COAD	1	9	8	9	8	d4e1472a-7b5f-46f4-acb7-b961f634e28e	NA
TCGA-AA-3989	2009	242	NA	NA	NA	male	0	CIMP-L	MSS	5	stage iv	m1	n2	t3	NA	no	r2	colon	1	84	TCGA	COAD	1	9	8	8	7	d5619045-060a-4b60-86e4-6a5774994fd4	NA
TCGA-QL-A97D	2012	NA	666	NA	NA	female	NA	NA	Indeterminate	0	stage i	mx	n0	t2	black or african american	no	NA	colon	0	84	TCGA	COAD	1	10	9	10	9	d5a1f43e-25a7-47f5-b63e-43714f9f732a	NA
TCGA-D5-7000	2011	NA	312	NA	not hispanic or latino	female	NA	CIMP-H	MSS	0	stage i	m0	n0	t2	white	no	r0	colon	0	79	TCGA	COAD	1	8	7	8	7	d5a296ae-c165-413c-adcc-33c9e99ff873	NA
TCGA-A6-4107	2010	NA	987	NA	not hispanic or latino	female	NA	CIMP-H	MSS	2	stage iiib	m0	n1b	t3	white	no	r0	colon	0	57	TCGA	COAD	1	10	8	9	7	b079a153-62f9-4026-a2f8-a1390168bbb9	NA
TCGA-AA-A01Z	2004	NA	1126	NA	NA	male	0	CIMP-L	MSS	0	stage ii	m0	n0	t3	NA	no	r0	colon	0	68	TCGA	COAD	1	10	8	9	7	c9e829d9-cd08-41a9-a5a4-34f2d7d619c7	NA
TCGA-AA-A00R	2008	NA	30	NA	NA	female	1	CIMP-L	MSI-H	0	stage i	m0	n0	t2	NA	NA	r0	colon	0	64	TCGA	COAD	1	8	8	8	8	ca22edd4-eb7c-4677-84aa-6f0354459a19	NA
TCGA-AA-3667	2005	NA	426	NA	NA	female	0	Cluster3	MSI-L	0	stage i	m0	n0	t2	NA	no	r0	colon	0	36	TCGA	COAD	1	9	8	9	7	d651f9ba-8746-46c4-852c-6c2992c7d10e	NA
TCGA-D5-6539	2010	NA	380	NA	not hispanic or latino	female	0	Cluster4	MSS	0	NA	m0	n0	t3	white	no	r0	colon	0	45	TCGA	COAD	1	9	8	9	7	ef4bb5bf-4535-4bd1-8a74-aba920123ee2	NA
TCGA-G4-6315	2008	NA	1883	NA	not hispanic or latino	male	0	Cluster4	MSS	1	stage iv	m1	n1	t3	white	no	r0	colon	0	66	TCGA	COAD	1	9	7	8	6	ca5b878f-8bff-410a-8e6e-b1c133018c8d	NA
TCGA-AA-3968	2008	NA	669	NA	NA	female	NA	Cluster3	MSS	0	stage i	m0	n0	t2	NA	no	r0	colon	0	55	TCGA	COAD	1	9	8	8	7	cab7bdbc-0a11-4901-97c3-26b884f79cb5	NA
TCGA-AZ-4684	2006	NA	1977	NA	not hispanic or latino	male	NA	Cluster4	MSI-L	10	stage iva	m1	n2	t3	white	no	NA	colon	0	49	TCGA	COAD	1	9	7	8	7	cac80259-3a26-4a99-b0d3-13454068e6ed	NA
TCGA-F4-6459	2011	262	NA	NA	not hispanic or latino	female	0	Cluster4	MSS	6	stage iiib	m0	n2a	t3	white	no	r0	colon	1	61	TCGA	COAD	1	8	6	7	6	9fd08502-355b-4f5a-a25c-73ec7184f6d3	NA
TCGA-AA-3664	2005	NA	1643	NA	NA	female	0	CIMP-H	MSS	0	stage ii	m0	n0	t3	NA	no	r0	colon	0	74	TCGA	COAD	1	8	7	8	7	a06c09a8-0951-49f4-a765-5147bbcae109	NA
TCGA-D5-6924	2011	NA	435	NA	not hispanic or latino	male	0	Cluster3	MSS	0	stage iia	m0	n0	t3	white	no	r0	colon	0	68	TCGA	COAD	1	8	7	8	7	be85f845-b281-467c-8b97-bed7b7fdff64	NA
TCGA-AA-3870	2009	NA	912	NA	NA	female	0	CIMP-H	MSS	5	stage iv	m1	n2	t3	NA	NA	r0	colon	0	71	TCGA	COAD	1	9	8	8	8	beb63625-d9bf-4ccd-bc53-635b53d24240	NA
TCGA-D5-6538	2010	NA	521	NA	not hispanic or latino	female	0	CIMP-H	MSI-L	10	stage iiib	m0	n2	t3	white	no	r0	colon	0	79	TCGA	COAD	1	8	6	7	5	a117ace8-ac5a-48d8-8aee-3024d6f0f873	NA
TCGA-D5-6535	2010	NA	460	NA	not hispanic or latino	female	0	CIMP-L	MSS	1	stage iiib	mx	n1	t3	white	no	rx	colon	0	80	TCGA	COAD	1	10	9	10	9	a123dc45-e427-461e-8d60-c51307aa498c	NA
TCGA-DM-A1D9	2000	NA	4270	3920	not hispanic or latino	female	0	Cluster3	MSS	0	stage iia	m0	n0	t3	white	NA	NA	colon	0	67	TCGA	COAD	1	9	7	8	6	e3b6018c-ab2c-47c5-b183-a295d0110835	NA
TCGA-CM-4751	2009	NA	822	NA	not hispanic or latino	male	NA	CIMP-H	MSS	3	stage iiib	m0	n1b	t3	white	no	r0	colon	0	62	TCGA	COAD	1	10	9	9	9	e3ca9046-9634-4332-b19f-88b18110f941	NA
TCGA-AA-A00N	2008	122	NA	NA	NA	male	1	Cluster3	MSI-L	0	stage iib	m0	n0	t4	NA	NA	r0	colon	1	75	TCGA	COAD	1	8	7	8	7	e457344d-76fb-46bf-b362-61a6e811d131	NA
TCGA-AZ-4615	2009	NA	1002	NA	not hispanic or latino	male	NA	CIMP-H	MSI-H	1	stage iiib	m0	n1	t3	white	no	rx	colon	0	84	TCGA	COAD	1	9	9	9	8	bf69a4ce-ec7e-4752-a86d-dcc80e3c9a57	NA
TCGA-AA-3529	2007	0	NA	NA	NA	female	0	Cluster3	MSI-L	10	stage iiic	m0	n2	t3	NA	NA	r0	colon	1	78	TCGA	COAD	1	8	6	8	6	bfb07784-693b-4c25-874e-4ad6e04a5d46	NA
TCGA-AA-3867	2007	NA	731	NA	NA	male	0	Cluster3	MSS	4	stage iv	m1	n2	t3	NA	no	r2	colon	0	74	TCGA	COAD	1	8	7	8	6	d655bbf6-c710-411d-aff5-ceb0fb6e6680	NA
TCGA-CM-6678	2011	NA	335	NA	not hispanic or latino	female	0	Cluster4	MSS	0	stage iva	m1a	n1c	t4a	white	no	r0	colon	0	63	TCGA	COAD	1	9	7	8	6	d7048098-09b3-4763-ad54-9c5c6fe14bc0	NA
TCGA-DM-A1DB	2000	1348	NA	1348	not hispanic or latino	male	0	Cluster4	MSS	0	stage iia	m0	n0	t3	white	NA	NA	colon	1	68	TCGA	COAD	1	9	8	9	7	d71ae66e-2c8a-4fd8-8b4b-a5a2d456a21d	NA
TCGA-G4-6309	2007	NA	2600	NA	not hispanic or latino	female	1	Cluster4	MSI-H	2	stage iiib	m0	n1	t3	black or african american	no	r0	colon	0	40	TCGA	COAD	1	9	8	9	7	e4be17c8-0855-432c-bb80-28bb24b62f32	NA
TCGA-D5-6531	2010	NA	540	NA	not hispanic or latino	male	0	CIMP-H	MSS	0	stage iia	m0	n0	t3	white	no	r0	colon	0	75	TCGA	COAD	1	9	8	8	8	e4c0d890-a634-48bd-9108-e674532b0d2e	NA
TCGA-AZ-4682	2006	680	NA	NA	not hispanic or latino	male	NA	Cluster3	MSS	0	stage iva	m1	n0	t3	white	no	r0	colon	1	61	TCGA	COAD	1	10	8	9	7	e588714a-7753-4c3c-abb6-eaf1aab53ab3	NA
TCGA-D5-6540	2010	NA	491	NA	not hispanic or latino	male	1	CIMP-H	MSI-H	0	stage i	m0	n0	t2	white	no	r0	colon	0	66	TCGA	COAD	1	9	8	9	7	b08b5f49-9434-4653-9772-097ec29b2ca3	NA
TCGA-AA-3525	2007	NA	245	NA	NA	male	1	CIMP-H	MSI-H	2	stage iiib	m0	n1	t3	NA	no	r0	colon	0	89	TCGA	COAD	1	10	9	10	8	b107565b-7558-4745-952b-689178367e1c	NA
TCGA-AA-3815	2007	NA	1005	NA	NA	female	NA	CIMP-H	MSI-H	0	stage iia	m0	n0	t3	NA	no	r0	colon	0	65	TCGA	COAD	1	7	7	7	7	b16bb717-d1cf-4237-a554-43f3995b82f2	NA
TCGA-AA-3684	2007	NA	0	NA	NA	female	0	CIMP-L	MSS	9	stage iv	m1	n2	t4	NA	NA	r2	colon	0	65	TCGA	COAD	1	10	9	9	8	d761bc06-dee8-478a-be99-8af9c504e49c	NA
TCGA-AA-3522	2007	NA	1127	NA	NA	male	0	CIMP-L	MSS	0	stage iia	m0	n0	t3	NA	no	r0	colon	0	67	TCGA	COAD	1	10	8	9	8	d7ba64d7-b4e5-488d-9f28-bcb7bf3c0f35	NA
TCGA-AA-3949	2009	NA	791	NA	NA	female	1	CIMP-H	MSI-H	3	stage iiib	m0	n1	t3	NA	no	r0	colon	0	87	TCGA	COAD	1	8	9	8	8	cbdabbcd-d8f1-4d7c-9e18-ebd83d888c51	NA
TCGA-F4-6463	2011	NA	1087	NA	not hispanic or latino	male	0	Cluster4	MSS	0	stage iia	m0	n0	t3	white	no	r0	colon	0	51	TCGA	COAD	1	8	6	8	6	cbe23011-93b7-4e9f-b934-bd0122f91f54	NA
TCGA-CM-4744	2010	NA	609	NA	not hispanic or latino	male	0	CIMP-H	MSS	0	stage i	m0	n0	t2	white	no	r0	colon	0	69	TCGA	COAD	1	10	10	10	9	cc15469c-7bad-4e86-9da3-ae0c72e9d380	NA
TCGA-CM-5863	2010	NA	457	NA	not hispanic or latino	female	0	Cluster4	MSS	3	stage iiib	m0	n1b	t3	white	no	r0	colon	0	60	TCGA	COAD	1	9	7	8	6	cc1d6ad3-b60d-482e-8fa4-0af26823007d	NA
TCGA-NH-A5IV	2012	NA	588	NA	not hispanic or latino	female	NA	NA	NA	0	stage iia	mx	n0	t3	black or african american	no	r0	colon	0	90	TCGA	COAD	1	7	6	6	5	cc22913d-2dda-48bb-82aa-9960b73f3e44	NA
TCGA-AA-3950	2010	NA	730	NA	NA	female	NA	CIMP-H	MSI-H	0	stage iia	m0	n0	t3	NA	no	r0	colon	0	79	TCGA	COAD	1	7	7	7	7	cc53bf9e-5e27-4305-a08b-552120c10aa5	NA
TCGA-CM-5862	2010	153	NA	NA	not hispanic or latino	male	0	Cluster3	MSS	1	stage iva	m1a	n1a	t3	white	no	r0	colon	1	80	TCGA	COAD	1	8	7	8	6	a19cd9f8-482b-4b70-b7d7-06d6bb1b0260	NA
TCGA-A6-2685	2009	NA	1133	NA	not hispanic or latino	female	NA	Cluster4	MSS	0	stage iia	m0	n0	t3	black or african american	no	r0	colon	0	48	TCGA	COAD	1	8	7	8	7	e5921d6b-51cf-44be-b295-610cf7c3a69a	NA
TCGA-AA-A03J	2004	NA	1246	NA	NA	female	0	Cluster3	MSS	0	stage i	m0	n0	t2	NA	no	r0	colon	0	65	TCGA	COAD	1	10	9	10	9	e6c8c5fc-158a-4de4-b3f6-3b645584bbc7	NA
TCGA-AA-3549	2008	NA	639	NA	NA	male	0	CIMP-L	MSS	0	stage i	m0	n0	t2	NA	yes	r0	colon	0	69	TCGA	COAD	1	9	8	8	7	e6ec5a68-7555-4f26-bd7e-9cdb4c5f7004	NA
TCGA-AZ-4616	2009	156	NA	NA	not hispanic or latino	female	NA	CIMP-L	MSI-L	13	stage iv	m1	n2	t3	white	no	NA	colon	1	82	TCGA	COAD	1	10	9	9	9	e703af88-c05f-4d7b-b225-d640e4d1a2a5	NA
TCGA-D5-6923	2011	NA	378	NA	not hispanic or latino	male	NA	CIMP-H	MSS	0	stage i	m0	n0	t2	white	no	r0	colon	0	57	TCGA	COAD	1	8	6	7	6	b3c267aa-345d-40d8-a8da-f9f08c64f9c7	NA
TCGA-G4-6322	2009	NA	792	NA	not hispanic or latino	male	0	CIMP-L	MSI-L	2	stage iiib	mx	n1	t3	white	no	r0	colon	0	65	TCGA	COAD	1	10	8	9	8	b3fea9bb-53f9-4ddb-922d-b570562d7a7d	NA
TCGA-CM-4748	2010	NA	792	NA	not hispanic or latino	male	0	Cluster4	MSS	1	stage iiib	m0	n1a	t4a	white	no	r0	colon	0	53	TCGA	COAD	1	10	8	9	7	cd845618-4cc4-49c2-9055-c171d4c24ee1	NA
TCGA-5M-AAT6	2009	290	NA	NA	hispanic or latino	female	NA	NA	Indeterminate	10	stage iv	m1a	n2b	t4a	black or african american	no	r2	colon	1	40	TCGA	COAD	1	8	8	8	8	ce00896a-f7d2-4123-bb95-24cb6e53fc32	NA
TCGA-AA-A02Y	2007	NA	1216	NA	NA	male	0	CIMP-L	MSS	0	stage i	m0	n0	t2	NA	no	r0	colon	0	73	TCGA	COAD	1	10	9	9	8	a435fdf4-a89a-499e-9006-cbb5693eab26	NA
TCGA-AA-3666	2005	61	NA	NA	NA	male	0	Cluster3	MSS	2	stage iii	m0	n1	t3	NA	NA	r0	colon	1	68	TCGA	COAD	1	9	8	9	8	a512701f-88bb-4b05-8c94-fd285b9dd13e	NA
TCGA-5M-AATE	2011	NA	1200	NA	hispanic or latino	male	NA	NA	Indeterminate	0	stage iia	m0	n0	t3	black or african american	no	r0	colon	0	76	TCGA	COAD	1	9	7	9	7	a54b322b-80d3-435c-8d14-25841b741f6c	NA
TCGA-DM-A282	2000	NA	4233	NA	not hispanic or latino	female	0	Cluster4	MSS	0	stage iia	m0	n0	t3	white	NA	NA	colon	0	60	TCGA	COAD	1	9	7	8	6	e75985cb-357e-4072-b047-eea37965d70c	NA
TCGA-F4-6805	2011	NA	1047	NA	not hispanic or latino	female	0	Cluster4	MSS	NA	stage iia	m0	n0	t3	white	no	r0	colon	0	58	TCGA	COAD	1	8	7	8	7	e76258b7-e13a-4b05-855b-d792701ffba1	NA
TCGA-A6-2680	2009	NA	1068	NA	not hispanic or latino	female	NA	Cluster4	MSS	0	stage ii	m0	n0	t3	black or african american	no	r0	colon	0	72	TCGA	COAD	1	10	8	9	8	ff1407c6-9174-4bae-a19b-d34ca71b898c	NA
TCGA-DM-A28G	2001	1849	NA	NA	not hispanic or latino	male	NA	CIMP-L	MSS	0	stage iia	m0	n0	t3	white	NA	NA	colon	1	75	TCGA	COAD	1	8	7	8	6	ffa7e03a-4a3c-41f0-937a-4fb862fd2194	NA
TCGA-5M-AATA	NA	NA	NA	NA	NA	NA	NA	NA	NA	NA	NA	NA	NA	NA	NA	NA	NA	NA	NA	NA	TCGA	COAD	1	9	7	8	7	a9e4b6db-8b4b-4345-a4a1-d63175eb0174	NA
TCGA-A6-2670	NA	NA	NA	NA	NA	NA	NA	NA	NA	NA	NA	NA	NA	NA	NA	NA	NA	NA	NA	NA	TCGA	COAD	0	NA	NA	NA	NA	65bb7520-f055-43a8-b735-1152fa2c9e04	NA
