# Supplementary material for: A Novel Prognostic Chemokine-Related lncRNAs Signature Associated with Immune Landscape in Colon Adenocarcinoma
Source: Dis Markers. 2022 Nov 3;2022:2823042. doi: 10.1155/2022/2823042 (PMC9649319; doi:10.1155/2022/2823042)
Supplement: Supplementary Materials — Supplementary Figure S1: (A) Heatmap of the expression of prognostic chemokine-related lncRNAs between tumor tissues and normal tissues. (B) Boxplot of the expression of prognostic chemokine-related prognostic lncRNAs in COAD tissues and normal tissues. (C) Barplot showed the proportion of 22 kinds of TIICs in each COAD sample. (D) Correlation between 22 kinds of TIICs was visualized. ∗p < 0.05; ∗∗p < 0.01; ∗∗∗p < 0.001. Supplementary Figure S2: Survival analysis was conducted in high-risk and low-risk patients with different clinical parameters. Supplementary Figure S3: Risk stratification showed the differences in drug susceptibility between high-risk and low-risk groups. Supplementary Table S1: Clinical information of the COAD patients. Supplementary Table S2: The 64 chemokine genes. Supplementary Table S3: Expression of 52 chemokine-related lncRNAs in COAD. Supplementary Table S4: Immune cell content of COAD samples was calculated using the CIBERSORT algorithm. Supplementary Table S5: Immune, Stromal, and ESTIMATE scores for COAD samples. Supplementary Table S6: Expression of 10 chemokine-related lncRNAs and risk score in the entire cohort. Supplementary Table S7: The immune cell infiltration status in all tumor samples in RNA-seq. Supplementary Table S8: Tumor mutation burden data of the low-risk group. Supplementary Table S9: Tumor mutation burden data of the high-risk group. Supplementary Table S10. The immunotherapy score data was obtained from the TCIA database. Supplementary Table S11: Quantitative real-time PCR primer sequences of model lncRNAs. Supplementary Table S12: The correlation values of immune cell infiltration and patient risk score. Supplementary Table S13: The correlation values of chemokine-related lncRNAs and immune cells. [file 2823042.f1.zip › Supplementary Table 12.txt]

immune	cor	pvalue
B cell_TIMER	0.242546906	2.15E-07
T cell CD4+_TIMER	0.290665193	3.93E-10
T cell CD8+_TIMER	0.208891928	8.65E-06
Neutrophil_TIMER	0.317933411	6.21E-12
Macrophage_TIMER	0.260474958	2.38E-08
Myeloid dendritic cell_TIMER	0.327686282	1.27E-12
T cell CD8+_CIBERSORT	0.108509631	0.021910039
T cell gamma delta_CIBERSORT	0.13037065	0.005827895
NK cell resting_CIBERSORT	-0.194047702	3.69E-05
NK cell activated_CIBERSORT	0.10897695	0.021343433
Macrophage M0_CIBERSORT	-0.10676771	0.024138494
Macrophage M1_CIBERSORT	0.155009423	0.001022415
Macrophage M2_CIBERSORT	0.191683899	4.61E-05
Myeloid dendritic cell activated_CIBERSORT	-0.095510318	0.043799433
Mast cell resting_CIBERSORT	-0.143185548	0.002437122
Neutrophil_CIBERSORT	0.120631329	0.010780131
T cell CD8+_CIBERSORT-ABS	0.260622562	2.33E-08
T cell CD4+ memory resting_CIBERSORT-ABS	0.181605276	0.000114965
T cell follicular helper_CIBERSORT-ABS	0.22005862	2.71E-06
T cell regulatory (Tregs)_CIBERSORT-ABS	0.11523144	0.014898954
T cell gamma delta_CIBERSORT-ABS	0.130489941	0.005782694
NK cell resting_CIBERSORT-ABS	-0.118839333	0.012018634
NK cell activated_CIBERSORT-ABS	0.214303662	4.96E-06
Monocyte_CIBERSORT-ABS	0.135468085	0.004155553
Macrophage M0_CIBERSORT-ABS	0.112790423	0.017176287
Macrophage M1_CIBERSORT-ABS	0.288957092	5.02E-10
Macrophage M2_CIBERSORT-ABS	0.337131711	2.57E-13
Mast cell activated_CIBERSORT-ABS	0.096740506	0.041142272
Neutrophil_CIBERSORT-ABS	0.144155654	0.002274788
B cell_QUANTISEQ	0.183561529	9.66E-05
Macrophage M1_QUANTISEQ	0.171193301	0.000281142
Macrophage M2_QUANTISEQ	0.23481423	5.29E-07
NK cell_QUANTISEQ	-0.094863017	0.045254628
T cell CD8+_QUANTISEQ	0.206672243	1.08E-05
T cell regulatory (Tregs)_QUANTISEQ	0.336452621	2.89E-13
Myeloid dendritic cell_QUANTISEQ	0.131227999	0.005509972
uncharacterized cell_QUANTISEQ	-0.23639428	4.42E-07
T cell_MCPCOUNTER	0.223668733	1.83E-06
T cell CD8+_MCPCOUNTER	0.130963502	0.005606348
cytotoxicity score_MCPCOUNTER	0.277300258	2.57E-09
NK cell_MCPCOUNTER	0.276079374	3.03E-09
B cell_MCPCOUNTER	0.215608814	4.33E-06
Monocyte_MCPCOUNTER	0.363070687	2.42E-15
Macrophage/Monocyte_MCPCOUNTER	0.363070687	2.42E-15
Myeloid dendritic cell_MCPCOUNTER	0.286302284	7.33E-10
Endothelial cell_MCPCOUNTER	0.227181649	1.25E-06
Cancer associated fibroblast_MCPCOUNTER	0.259968869	2.53E-08
Myeloid dendritic cell activated_XCELL	0.314502504	1.07E-11
B cell_XCELL	0.191247921	4.80E-05
T cell CD4+ memory_XCELL	0.10111934	0.032761635
T cell CD4+ naive_XCELL	0.222113928	2.17E-06
T cell CD8+_XCELL	0.154137682	0.001092361
T cell CD8+ central memory_XCELL	0.217291357	3.63E-06
Class-switched memory B cell_XCELL	0.108560723	0.021847464
Myeloid dendritic cell_XCELL	0.288047845	5.72E-10
Endothelial cell_XCELL	0.144161119	0.002273902
Granulocyte-monocyte progenitor_XCELL	0.122960692	0.009339919
Macrophage_XCELL	0.255927029	4.22E-08
Macrophage M1_XCELL	0.285324749	8.42E-10
Macrophage M2_XCELL	0.136014759	0.004004839
B cell memory_XCELL	0.100341133	0.034134619
Monocyte_XCELL	0.215825368	4.24E-06
B cell naive_XCELL	0.129468086	0.006180302
T cell gamma delta_XCELL	-0.170674299	0.000293571
T cell CD4+ Th1_XCELL	-0.144922105	0.002153582
T cell CD4+ Th2_XCELL	0.165655522	0.000443221
immune score_XCELL	0.294276987	2.32E-10
stroma score_XCELL	0.169160575	0.000332815
microenvironment score_XCELL	0.327488392	1.31E-12
B cell_EPIC	0.188900315	5.96E-05
Cancer associated fibroblast_EPIC	0.266352203	1.11E-08
T cell CD4+_EPIC	0.193665632	3.83E-05
Endothelial cell_EPIC	0.191840392	4.54E-05
Macrophage_EPIC	0.358135751	6.07E-15
NK cell_EPIC	0.246788162	1.30E-07
uncharacterized cell_EPIC	-0.354817342	1.12E-14
