# Supplementary material for: A Novel Prognostic Chemokine-Related lncRNAs Signature Associated with Immune Landscape in Colon Adenocarcinoma
Source: Dis Markers. 2022 Nov 3;2022:2823042. doi: 10.1155/2022/2823042 (PMC9649319; doi:10.1155/2022/2823042)
Supplement: Supplementary Materials — Supplementary Figure S1: (A) Heatmap of the expression of prognostic chemokine-related lncRNAs between tumor tissues and normal tissues. (B) Boxplot of the expression of prognostic chemokine-related prognostic lncRNAs in COAD tissues and normal tissues. (C) Barplot showed the proportion of 22 kinds of TIICs in each COAD sample. (D) Correlation between 22 kinds of TIICs was visualized. ∗p < 0.05; ∗∗p < 0.01; ∗∗∗p < 0.001. Supplementary Figure S2: Survival analysis was conducted in high-risk and low-risk patients with different clinical parameters. Supplementary Figure S3: Risk stratification showed the differences in drug susceptibility between high-risk and low-risk groups. Supplementary Table S1: Clinical information of the COAD patients. Supplementary Table S2: The 64 chemokine genes. Supplementary Table S3: Expression of 52 chemokine-related lncRNAs in COAD. Supplementary Table S4: Immune cell content of COAD samples was calculated using the CIBERSORT algorithm. Supplementary Table S5: Immune, Stromal, and ESTIMATE scores for COAD samples. Supplementary Table S6: Expression of 10 chemokine-related lncRNAs and risk score in the entire cohort. Supplementary Table S7: The immune cell infiltration status in all tumor samples in RNA-seq. Supplementary Table S8: Tumor mutation burden data of the low-risk group. Supplementary Table S9: Tumor mutation burden data of the high-risk group. Supplementary Table S10. The immunotherapy score data was obtained from the TCIA database. Supplementary Table S11: Quantitative real-time PCR primer sequences of model lncRNAs. Supplementary Table S12: The correlation values of immune cell infiltration and patient risk score. Supplementary Table S13: The correlation values of chemokine-related lncRNAs and immune cells. [file 2823042.f1.zip › Supplementary Table 13.txt]

Gene	immune	cor	pvalue
VIM-AS1	T cell CD4+_TIMER	4.62E-01	6.34E-25
VIM-AS1	T cell CD8+_TIMER	4.25E-01	5.86E-21
VIM-AS1	Neutrophil_TIMER	6.03E-01	1.87E-45
VIM-AS1	Myeloid dendritic cell_TIMER	6.03E-01	1.51E-45
VIM-AS1	T cell CD8+_CIBERSORT-ABS	4.84E-01	1.40E-27
VIM-AS1	T cell CD4+ memory resting_CIBERSORT-ABS	4.16E-01	4.32E-20
VIM-AS1	T cell follicular helper_CIBERSORT-ABS	0.53497854	2.19E-34
VIM-AS1	Macrophage M1_CIBERSORT-ABS	0.565521738	4.64E-39
VIM-AS1	Macrophage M2_CIBERSORT-ABS	5.70E-01	1.01E-39
VIM-AS1	T cell CD8+_QUANTISEQ	0.411257057	1.25E-19
VIM-AS1	T cell regulatory (Tregs)_QUANTISEQ	0.529465681	1.36E-33
VIM-AS1	uncharacterized cell_QUANTISEQ	-0.407137226	3.09E-19
VIM-AS1	T cell_MCPCOUNTER	5.02E-01	6.98E-30
VIM-AS1	cytotoxicity score_MCPCOUNTER	0.487618235	5.13E-28
VIM-AS1	B cell_MCPCOUNTER	0.447837625	2.20E-23
VIM-AS1	Monocyte_MCPCOUNTER	0.591979675	1.60E-43
VIM-AS1	Macrophage/Monocyte_MCPCOUNTER	5.92E-01	1.60E-43
VIM-AS1	Myeloid dendritic cell_MCPCOUNTER	0.557050142	1.03E-37
VIM-AS1	Endothelial cell_MCPCOUNTER	4.13E-01	7.72E-20
VIM-AS1	Cancer associated fibroblast_MCPCOUNTER	0.414719061	5.75E-20
VIM-AS1	Myeloid dendritic cell activated_XCELL	0.597902764	1.41E-44
VIM-AS1	T cell CD8+ central memory_XCELL	0.454926153	3.63E-24
VIM-AS1	Myeloid dendritic cell_XCELL	5.21E-01	2.34E-32
VIM-AS1	Macrophage_XCELL	0.457377507	1.93E-24
VIM-AS1	Macrophage M1_XCELL	0.487465307	5.35E-28
VIM-AS1	immune score_XCELL	5.49E-01	1.67E-36
VIM-AS1	microenvironment score_XCELL	5.76E-01	9.34E-41
VIM-AS1	Cancer associated fibroblast_EPIC	0.415489046	4.83E-20
VIM-AS1	Macrophage_EPIC	0.554275219	2.78E-37
VIM-AS1	uncharacterized cell_EPIC	-5.30E-01	9.78E-34
AC004846.1	T cell CD4+_TIMER	0.417265703	3.23E-20
AC004846.1	Neutrophil_TIMER	4.18E-01	2.91E-20
AC004846.1	Myeloid dendritic cell_TIMER	0.465272603	2.43E-25
AC004846.1	Macrophage M2_CIBERSORT-ABS	5.07E-01	1.81E-30
AC004846.1	Monocyte_MCPCOUNTER	5.31E-01	8.01E-34
AC004846.1	Macrophage/Monocyte_MCPCOUNTER	0.53108276	8.01E-34
AC004846.1	Myeloid dendritic cell_MCPCOUNTER	4.83E-01	1.77E-27
AC004846.1	Endothelial cell_MCPCOUNTER	4.49E-01	1.71E-23
AC004846.1	Cancer associated fibroblast_MCPCOUNTER	0.523072795	1.09E-32
AC004846.1	Myeloid dendritic cell activated_XCELL	5.07E-01	1.83E-30
AC004846.1	Myeloid dendritic cell_XCELL	4.52E-01	7.31E-24
AC004846.1	Macrophage_XCELL	4.43E-01	6.64E-23
AC004846.1	Macrophage M1_XCELL	4.74E-01	2.36E-26
AC004846.1	immune score_XCELL	4.08E-01	2.42E-19
AC004846.1	microenvironment score_XCELL	4.82E-01	2.56E-27
AC004846.1	Cancer associated fibroblast_EPIC	4.67E-01	1.67E-25
AC004846.1	Macrophage_EPIC	4.97E-01	3.00E-29
AC004846.1	uncharacterized cell_EPIC	-5.06E-01	2.13E-30
MYOSLID	Cancer associated fibroblast_MCPCOUNTER	4.89E-01	3.41E-28
MYOSLID	Cancer associated fibroblast_EPIC	0.48945211	3.03E-28
MYOSLID	uncharacterized cell_EPIC	-4.21E-01	1.43E-20
AL161935.3	Macrophage M2_CIBERSORT-ABS	0.454822876	3.73E-24
AL161935.3	Monocyte_MCPCOUNTER	4.21E-01	1.39E-20
AL161935.3	Macrophage/Monocyte_MCPCOUNTER	0.420975245	1.39E-20
AL161935.3	Myeloid dendritic cell_MCPCOUNTER	4.02E-01	8.53E-19
