# Supplementary figures and images for: A Novel Prognostic Chemokine-Related lncRNAs Signature Associated with Immune Landscape in Colon Adenocarcinoma
Source: Hindawi journal article supplement (doi:10.1155/2022/2823042), 2022-11-03

A

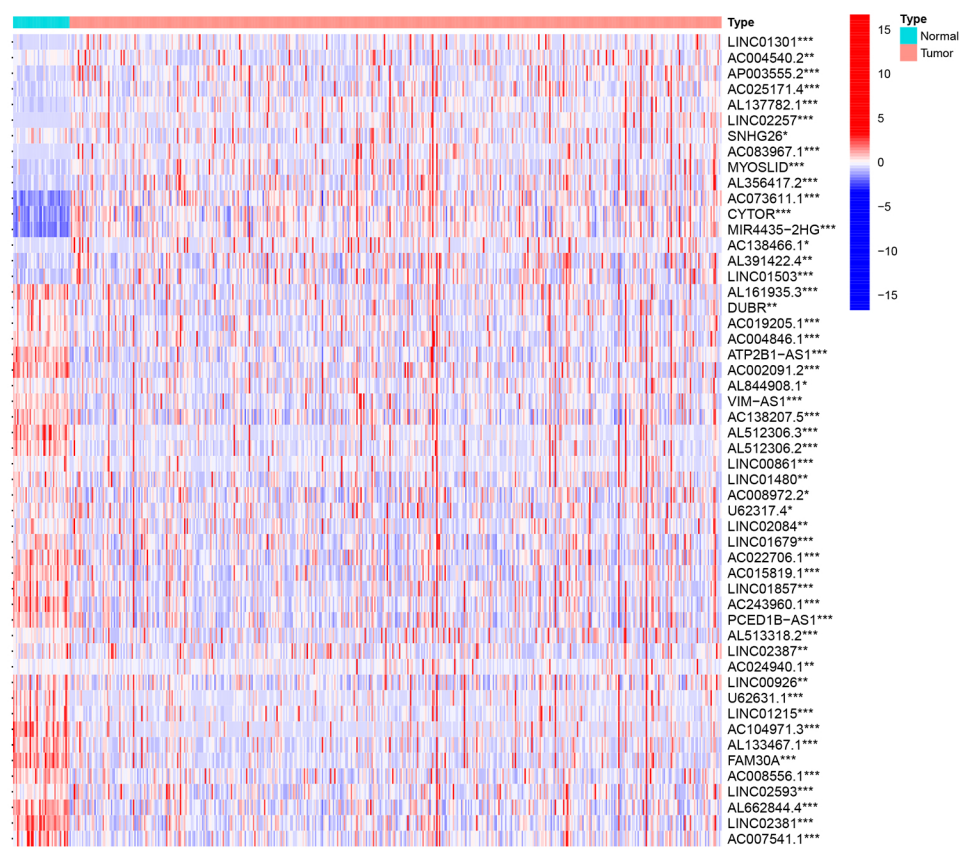

B

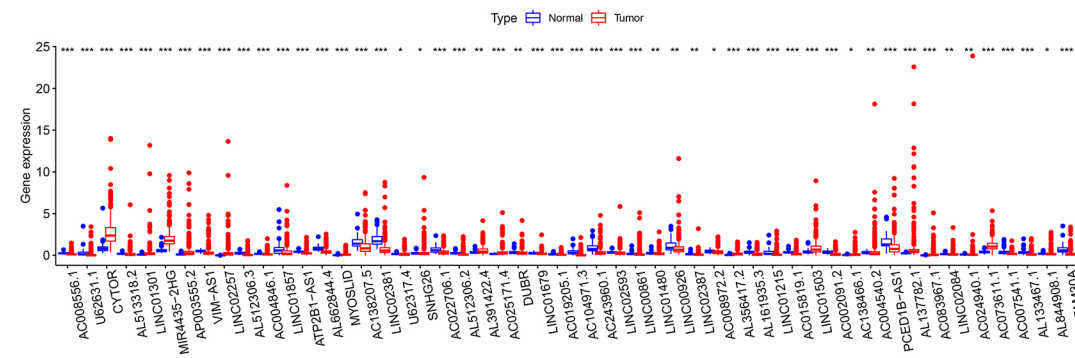

D

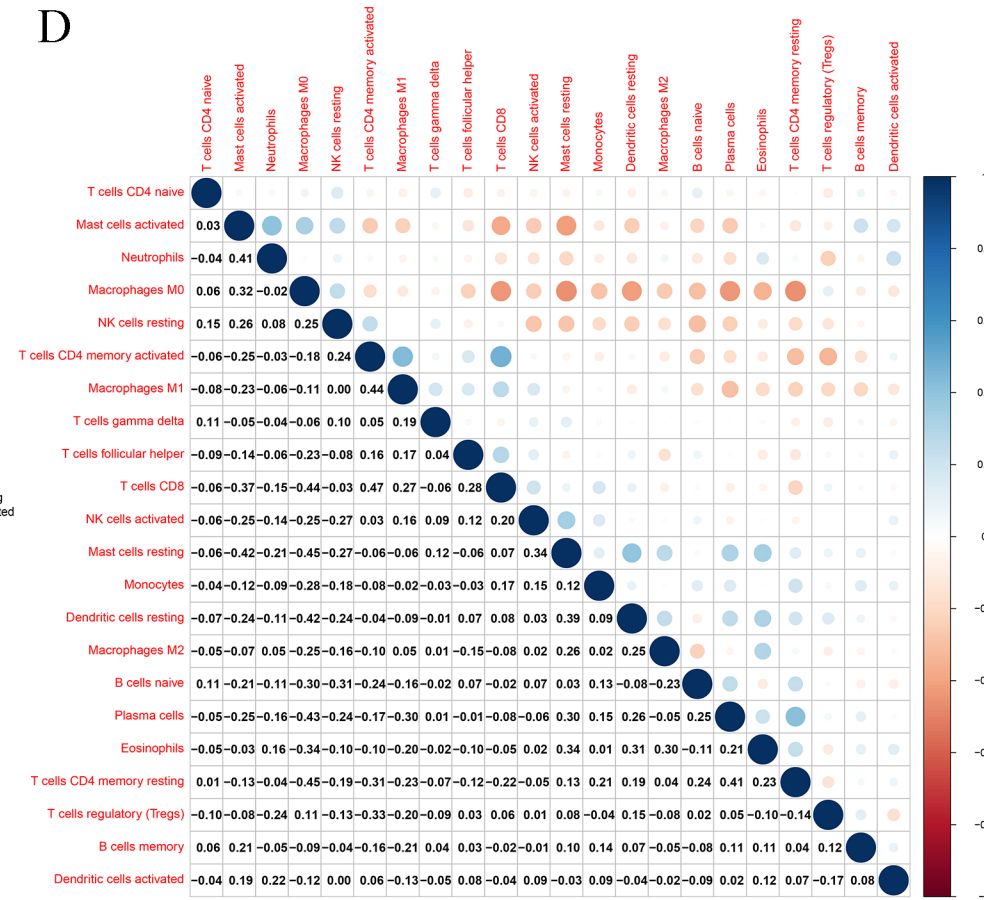

C

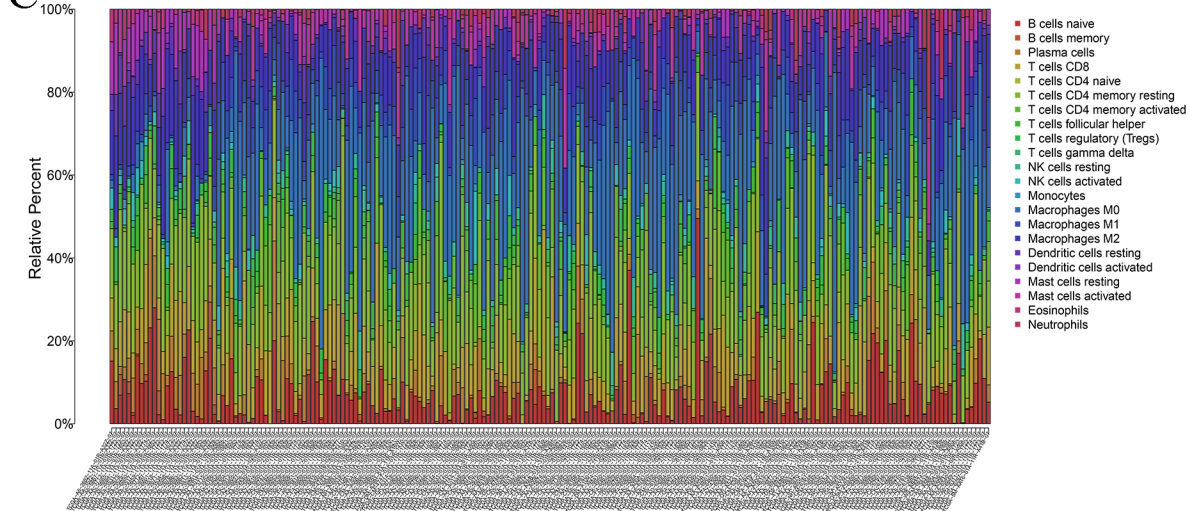

Supplement: f1 [file 2823042.f1.zip]

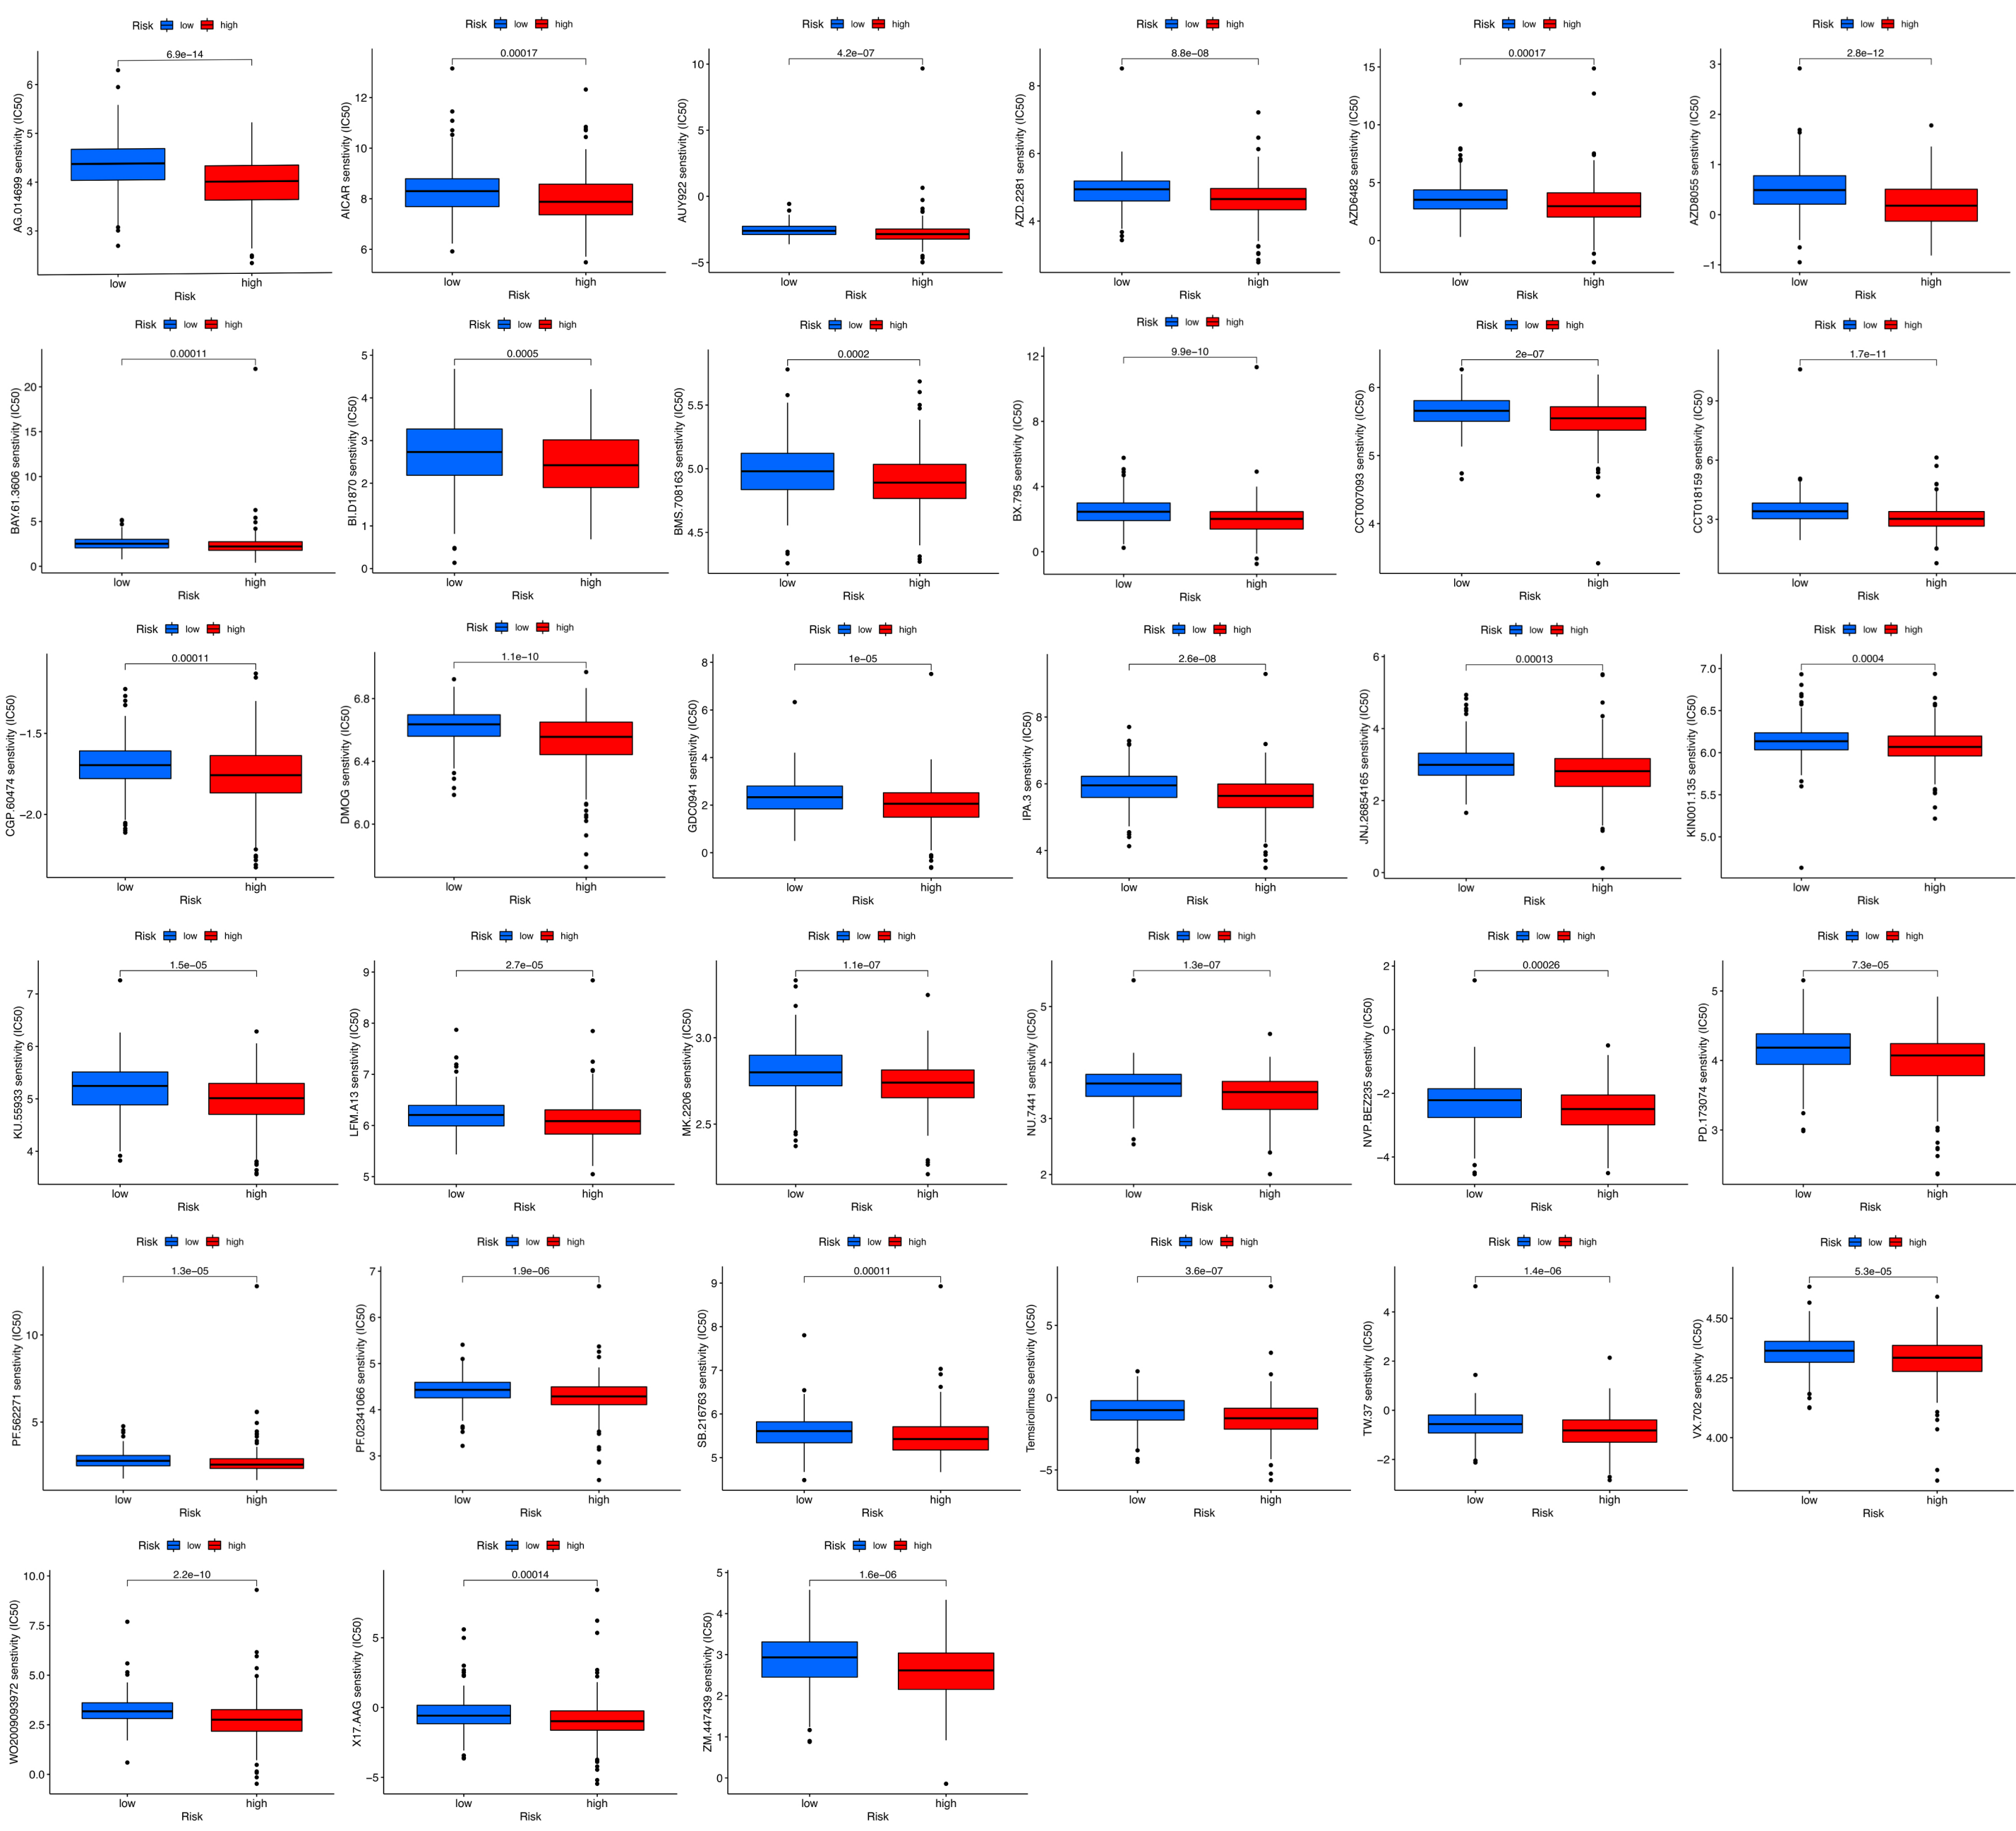

Supplement: f1 [file 2823042.f1.zip]
